# Supplementary material for: Ablation of STAT3 in Purkinje cells reorganizes cerebellar synaptic plasticity in long-term fear memory network
Source: eLife. 2021 Jan 18;10:e63291. doi: 10.7554/eLife.63291 (PMC7813544; doi:10.7554/eLife.63291)
Supplement: Figure 2—source data 2. [file elife-63291-fig2-data2.xlsx]

## Sheet: volcano_plot
Gene	baseMean	log2FoldChange	lfcSE	stat	pvalue	padj	log(padj)
ENSMUSG00000000001_Gnai3	60.9811	0.628438	0.347801	1.80689	0.0707796	0.176039	0.754392
ENSMUSG00000000028_Cdc45	4.64374	-0.120011	0.795268	-0.150906	0.88005	0.922983	0.0348062
ENSMUSG00000000031_H19	7.46949	-1.88832	0.765564	-2.46658	0.0136411	0.0635443	1.19692
ENSMUSG00000000037_Scml2	1.35014	-0.31045	0.764115	-0.406287	0.684532	1	0
ENSMUSG00000000049_Apoh	0.965168	-1.05098	0.749985	-1.40133	0.161114	1	0
ENSMUSG00000000056_Narf	115.946	0.659704	0.323673	2.03818	0.041532	0.125977	0.89971
ENSMUSG00000000058_Cav2	14.0662	-0.482424	0.594669	-0.811247	0.417224	0.558858	0.252698
ENSMUSG00000000078_Klf6	32.1613	0.32672	0.444913	0.734345	0.462738	0.599828	0.221974
ENSMUSG00000000085_Scmh1	86.2607	0.0765502	0.307492	0.24895	0.803399	0.868379	0.0612906
ENSMUSG00000000088_Cox5a	86.6097	1.0723	0.357514	2.99933	0.0027057	0.0241057	1.61788
ENSMUSG00000000093_Tbx2	5.50711	-1.8782	0.810003	-2.31876	0.0204083	0.0807542	1.09283
ENSMUSG00000000094_Tbx4	6.95802	-1.26055	0.78301	-1.60988	0.107424	0.228128	0.641822
ENSMUSG00000000103_Zfy2	1.45247	-0.671932	0.777226	-0.864526	0.387299	1	0
ENSMUSG00000000120_Ngfr	20.4375	-0.0486881	0.553148	-0.0880201	0.929861	0.956055	0.019517
ENSMUSG00000000125_Wnt3	33.8691	0.365343	0.436666	0.836664	0.402781	0.546188	0.262658
ENSMUSG00000000126_Wnt9a	6.03521	-2.90768	0.803619	-3.61823	0.000296619	0.00633729	2.1981
ENSMUSG00000000127_Fer	81.3908	0.521871	0.302505	1.72516	0.0844979	0.196246	0.707199
ENSMUSG00000000131_Xpo6	168.165	-0.422452	0.230059	-1.83628	0.0663165	0.169258	0.77145
ENSMUSG00000000134_Tfe3	42.1679	-0.0787898	0.411092	-0.19166	0.848009	0.90079	0.0453764
ENSMUSG00000000142_Axin2	41.6229	-0.276883	0.40028	-0.691723	0.489111	0.622455	0.205892
ENSMUSG00000000148_Brat1	38.6244	-0.847657	0.423909	-1.99962	0.0455413	0.133632	0.874088
ENSMUSG00000000149_Gna12	57.4033	0.807686	0.371113	2.17639	0.029526	0.101943	0.991641
ENSMUSG00000000154_Slc22a18	0.269776	-0.188905	0.604589	-0.312452	0.754697	1	0
ENSMUSG00000000157_Itgb2l	1.57565	-0.755736	0.812015	-0.930692	0.352013	1	0
ENSMUSG00000000159_Igsf5	8.34424	-1.78771	0.753796	-2.37161	0.0177106	0.0742081	1.12955
ENSMUSG00000000167_Pih1d2	8.48144	-1.16471	0.705957	-1.64983	0.0989785	0.216515	0.664512
ENSMUSG00000000168_Dlat	166.299	0.720602	0.279614	2.57713	0.00996242	0.052794	1.27742
ENSMUSG00000000171_Sdhd	78.0709	0.695728	0.327903	2.12175	0.0338588	0.110504	0.956621
ENSMUSG00000000182_Fgf23	4.18647	-0.537027	0.812918	-0.660617	0.508858	0.639952	0.193853
ENSMUSG00000000183_Fgf6	20.6265	-1.15936	0.609104	-1.90338	0.0569906	0.153387	0.814211
ENSMUSG00000000184_Ccnd2	34.8023	-1.96444	0.510123	-3.8509	0.000117683	0.00368472	2.4336
ENSMUSG00000000194_Gpr107	110.305	-0.149628	0.291965	-0.512485	0.608312	0.721982	0.141474
ENSMUSG00000000197_Nalcn	153.973	0.866695	0.247745	3.49834	0.000468161	0.00834769	2.07843
ENSMUSG00000000202_Btbd17	37.9189	0.135243	0.415718	0.325324	0.744936	0.824658	0.0837262
ENSMUSG00000000204_Slfn4	5.42237	-1.24394	0.836181	-1.48765	0.136844	0.267465	0.572733
ENSMUSG00000000214_Th	21.5862	1.58929	0.557555	2.85046	0.00436556	0.0323706	1.48985
ENSMUSG00000000215_Ins2	0.65443	-0.667739	0.661464	-1.00949	0.312741	1	0
ENSMUSG00000000216_Scnn1g	6.47374	-1.12707	0.749117	-1.50454	0.132443	0.261894	0.581874
ENSMUSG00000000223_Drp2	55.0837	0.106105	0.352836	0.300721	0.763627	0.838626	0.0764317
ENSMUSG00000000244_Tspan32	12.7618	-1.87932	0.653849	-2.87425	0.00404992	0.0311298	1.50682
ENSMUSG00000000247_Lhx2	12.7791	-2.36498	0.694019	-3.40766	0.00065522	0.010228	1.99021
ENSMUSG00000000248_Clec2g	4.6219	-1.05356	0.824876	-1.27723	0.20152	0.344387	0.462954
ENSMUSG00000000253_Gmpr	14.4078	0.451915	0.599009	0.754437	0.450587	0.589018	0.229871
ENSMUSG00000000263_Glra1	8.66596	-0.312084	0.69017	-0.452184	0.651136	0.755615	0.121699
ENSMUSG00000000266_Mid2	83.6083	0.867013	0.313539	2.76524	0.00568802	0.0380169	1.42002
ENSMUSG00000000275_Trim25	17.3004	-1.22757	0.574494	-2.13679	0.032615	0.108196	0.96579
ENSMUSG00000000276_Dgke	128.835	0.691052	0.279717	2.47054	0.0134908	0.0631584	1.19957
ENSMUSG00000000278_Scpep1	9.15772	0.552873	0.681129	0.8117	0.416964	0.558613	0.252889
ENSMUSG00000000282_Mnt	30.8762	-0.236121	0.432458	-0.545997	0.585068	0.703715	0.152603
ENSMUSG00000000290_Itgb2	5.89035	-1.4682	0.795024	-1.84673	0.0647861	0.167049	0.777155
ENSMUSG00000000295_Hddc2	14.7355	-0.40356	0.588447	-0.685804	0.492837	0.62592	0.203481
ENSMUSG00000000296_Tpd52l1	15.603	-0.23412	0.599728	-0.390377	0.696258	0.790122	0.102306
ENSMUSG00000000301_Pemt	1.18493	0.238018	0.793802	0.299846	0.764295	1	0
ENSMUSG00000000303_Cdh1	17.326	-0.2363	0.543004	-0.435172	0.663437	0.764815	0.116444
ENSMUSG00000000305_Cdh4	64.8589	0.496023	0.3351	1.48022	0.138814	0.269985	0.568661
ENSMUSG00000000308_Ckmt1	222.194	0.82545	0.256859	3.21363	0.00131067	0.0155088	1.80942
ENSMUSG00000000317_Bcl6b	11.0981	-1.06698	0.688895	-1.54883	0.121422	0.246812	0.607634
ENSMUSG00000000318_Clec10a	2.76902	-0.781183	0.848532	-0.920629	0.357244	0.503614	0.297902
ENSMUSG00000000320_Alox12	7.93846	-2.66564	0.743514	-3.58519	0.000336828	0.006901	2.16109
ENSMUSG00000000325_Arvcf	27.0331	0.0830219	0.470522	0.176446	0.859943	0.908353	0.0417452
ENSMUSG00000000326_Comt	37.0361	0.269427	0.415938	0.647758	0.517141	0.647248	0.188929
ENSMUSG00000000339_Rtca	49.7457	0.563418	0.372255	1.51353	0.130145	0.258797	0.587041
ENSMUSG00000000340_Dbt	37.2346	0.240091	0.437298	0.549034	0.582982	0.702626	0.153276
ENSMUSG00000000346_Dazap2	70.8065	0.729167	0.327504	2.22644	0.0259847	0.0944262	1.02491
ENSMUSG00000000355_Mcts1	28.0904	0.604581	0.47512	1.27248	0.203203	0.346398	0.460425
ENSMUSG00000000359_Rem1	7.62422	-3.30111	0.809611	-4.0774	4.55e-05	0.00207383	2.68323
ENSMUSG00000000365_Rnf17	11.1722	-0.235042	0.644014	-0.364964	0.715139	0.803856	0.0948217
ENSMUSG00000000374_Trappc10	74.9244	0.728002	0.317331	2.29414	0.0217823	0.0842616	1.07437
ENSMUSG00000000378_Ccm2	61.8678	-0.107677	0.330128	-0.326168	0.744297	0.824127	0.0840056
ENSMUSG00000000381_Wap	1.02135	-0.961175	0.73286	-1.31154	0.189675	1	0
ENSMUSG00000000384_Tbrg4	13.8868	0.657589	0.61837	1.06342	0.28759	0.437015	0.359503
ENSMUSG00000000385_Tmprss2	2.96407	-0.714429	0.842823	-0.847662	0.396626	0.53989	0.267695
ENSMUSG00000000386_Mx1	4.71136	-1.7329	0.796646	-2.17524	0.0296119	0.102131	0.990842
ENSMUSG00000000392_Fap	4.85154	-0.00154156	0.806559	-0.00191128	0.998475	0.998978	0.000444069
ENSMUSG00000000394_Gcg	1.4319	-0.719147	0.816425	-0.880849	0.3784	1	0
ENSMUSG00000000399_Ndufa9	88.3046	0.500051	0.286634	1.74456	0.0810612	0.191431	0.717987
ENSMUSG00000000402_Egfl6	2.30723	-0.544847	0.847873	-0.642604	0.520481	0.649915	0.187143
ENSMUSG00000000409_Lck	6.23876	-1.79506	0.793202	-2.26305	0.0236326	0.0888165	1.05151
ENSMUSG00000000411_Tssk3	3.85311	-1.31858	0.823706	-1.60078	0.109425	0.230725	0.636904
ENSMUSG00000000416_Cttnbp2	387.113	0.314183	0.209822	1.49738	0.134294	0.264098	0.578235
ENSMUSG00000000420_Galnt1	132.062	0.549987	0.260122	2.11434	0.0344862	0.111958	0.950947
ENSMUSG00000000435_Myf5	3.53376	-2.17997	0.849233	-2.56699	0.0102586	0.053813	1.26911
ENSMUSG00000000439_Mkrn2	69.1305	0.218337	0.329499	0.662634	0.507565	0.639042	0.194471
ENSMUSG00000000440_Pparg	9.6058	0.280851	0.660245	0.425374	0.670564	0.770022	0.113497
ENSMUSG00000000441_Raf1	90.8447	0.611744	0.304732	2.00748	0.0446985	0.132045	0.879279
ENSMUSG00000000486_Sept1	11.8738	-1.40491	0.628463	-2.23547	0.0253865	0.093038	1.03134
ENSMUSG00000000489_Pdgfb	8.16731	-1.34322	0.722988	-1.85788	0.0631865	0.164093	0.78491
ENSMUSG00000000530_Acvrl1	6.24599	-0.503281	0.810316	-0.621092	0.534539	0.661614	0.179395
ENSMUSG00000000531_Grasp	4.24446	-0.378826	0.819822	-0.462084	0.644021	0.750225	0.124808
ENSMUSG00000000532_Acvr1b	51.8873	0.900871	0.3703	2.43281	0.014982	0.0669355	1.17434
ENSMUSG00000000538_Tom1l2	229.741	0.672845	0.202041	3.33024	0.000867697	0.0121813	1.91431
ENSMUSG00000000544_Gpa33	5.71599	-1.60117	0.794172	-2.01616	0.0437838	0.130327	0.884967
ENSMUSG00000000552_Zfp385a	78.0772	0.378729	0.353697	1.07077	0.284272	0.433799	0.362711
ENSMUSG00000000555_Itga5	5.78499	-1.4324	0.781085	-1.83386	0.0666745	0.169692	0.770339
ENSMUSG00000000560_Gabra2	109.38	0.0476066	0.263429	0.180719	0.856588	0.906218	0.0427673
ENSMUSG00000000561_Wdr77	51.9869	0.0878082	0.380529	0.230753	0.817507	0.878918	0.0560517
ENSMUSG00000000562_Adora3	7.70676	-1.94901	0.792078	-2.46063	0.0138694	0.064117	1.19303
ENSMUSG00000000563_Atp5f1	297.059	0.764143	0.227401	3.36033	0.000778482	0.0114061	1.94286
ENSMUSG00000000567_Sox9	162.569	0.3318	0.262402	1.26447	0.20606	0.349487	0.456569
ENSMUSG00000000568_Hnrnpd	418.596	0.199987	0.234603	0.852449	0.393965	0.537564	0.26957
ENSMUSG00000000579_Dynlt1c	42.5903	-0.731474	0.40952	-1.78618	0.0740708	0.181153	0.741955
ENSMUSG00000000581_C1d	32.7695	0.48709	0.445224	1.09403	0.273941	0.42264	0.37403
ENSMUSG00000000594_Gm2a	54.8156	0.99964	0.37097	2.69466	0.007046	0.0427826	1.36873
ENSMUSG00000000600_Krit1	186.907	0.131318	0.24326	0.539827	0.589316	0.707108	0.150514
ENSMUSG00000000605_Clcn4	197.941	0.983297	0.228919	4.29539	1.74e-05	0.00112281	2.94969
ENSMUSG00000000606_Vmn2r88	1.92594	-0.514665	0.834377	-0.616825	0.53735	1	0
ENSMUSG00000000617_Grm6	8.72227	-1.50253	0.753339	-1.99449	0.0460988	0.134627	0.870869
ENSMUSG00000000627_Sema4f	36.7597	0.547484	0.43591	1.25596	0.209132	0.35259	0.45273
ENSMUSG00000000628_Hk2	71.1244	0.213703	0.323359	0.660885	0.508686	0.639905	0.193884
ENSMUSG00000000631_Myo18a	408.852	0.342102	0.19497	1.75464	0.0793205	0.188893	0.723785
ENSMUSG00000000632_Sez6	65.7302	0.608804	0.358705	1.69723	0.0896535	0.203693	0.691025
ENSMUSG00000000682_Cd52	0.657726	-0.345138	0.690664	-0.499719	0.617273	1	0
ENSMUSG00000000686_Abhd15	10.2262	-1.44476	0.702545	-2.05647	0.039737	0.122429	0.912114
ENSMUSG00000000690_Hoxb6	7.6607	-2.09914	0.729538	-2.87736	0.0040102	0.0309442	1.50942
ENSMUSG00000000693_Loxl3	15.6736	-1.19758	0.599038	-1.99918	0.0455888	0.133718	0.873809
ENSMUSG00000000701_Tcl1b5	1.13953	-0.752205	0.773288	-0.972737	0.330684	1	0
ENSMUSG00000000706_Btn1a1	10.6847	-1.72055	0.735094	-2.34059	0.0192534	0.0779479	1.1082
ENSMUSG00000000708_Kat2b	114.916	1.03326	0.285998	3.61284	0.000302862	0.0064306	2.19175
ENSMUSG00000000711_Rab5b	103.66	0.133285	0.297762	0.447623	0.654425	0.757941	0.120365
ENSMUSG00000000724_Cryba1	1.52575	-0.946596	0.82435	-1.14829	0.250847	1	0
ENSMUSG00000000730_Dnmt3l	6.12421	-1.50544	0.800941	-1.87958	0.0601649	0.158964	0.798701
ENSMUSG00000000731_Aire	7.31299	-2.38849	0.794342	-3.00688	0.00263941	0.0237363	1.62459
ENSMUSG00000000732_Icosl	17.7733	0.661819	0.549249	1.20495	0.228222	0.374291	0.426791
ENSMUSG00000000738_Spg7	98.2356	0.557286	0.292458	1.90552	0.0567119	0.152929	0.815509
ENSMUSG00000000739_Sult5a1	0.838366	-0.302802	0.724632	-0.41787	0.676042	1	0
ENSMUSG00000000740_Rpl13	78.4628	0.939434	0.31158	3.01506	0.00256928	0.0233091	1.63247
ENSMUSG00000000743_Chmp1a	27.1224	0.429911	0.461096	0.932369	0.351146	0.498199	0.302597
ENSMUSG00000000751_Rpa1	86.5314	0.509423	0.293661	1.73473	0.0827878	0.193811	0.712622
ENSMUSG00000000753_Serpinf1	7.71462	-0.81695	0.728608	-1.12125	0.262183	0.411082	0.386071
ENSMUSG00000000759_Tubgcp3	85.8067	0.273053	0.303595	0.899397	0.368441	0.514177	0.288888
ENSMUSG00000000766_Oprm1	11.8087	-1.94748	0.690978	-2.81843	0.00482586	0.0343816	1.46367
ENSMUSG00000000776_Polr3d	49.6714	0.595159	0.392889	1.51483	0.129817	0.258334	0.587819
ENSMUSG00000000782_Tcf7	3.34711	0.0496157	0.832875	0.0595716	0.952497	0.970962	0.0127979
ENSMUSG00000000787_Ddx3x	551.052	0.65497	0.194006	3.37603	0.000735391	0.0109625	1.96009
ENSMUSG00000000791_Il12rb1	2.98037	-0.760589	0.838861	-0.906693	0.364569	0.51065	0.291876
ENSMUSG00000000792_Slc5a5	4.16591	-1.91638	0.836433	-2.29113	0.0219558	0.0846968	1.07213
ENSMUSG00000000794_Kcnn3	40.4408	-1.19223	0.419654	-2.84098	0.00449757	0.032952	1.48212
ENSMUSG00000000804_Usp32	216.68	0.651388	0.237997	2.73696	0.00620102	0.0398703	1.39935
ENSMUSG00000000805_Car4	32.5604	0.465269	0.438208	1.06175	0.288348	0.437572	0.35895
ENSMUSG00000000811_Txnrd3	10.2276	0.687313	0.680296	1.01031	0.312345	0.460851	0.33644
ENSMUSG00000000817_Fasl	7.23248	-2.90386	0.775547	-3.74428	0.000180912	0.00468973	2.32885
ENSMUSG00000000823_Zfp512b	59.8774	0.049116	0.3719	0.132068	0.894931	0.932567	0.03032
ENSMUSG00000000826_Dnajc5	201.634	0.723475	0.235221	3.07572	0.00209993	0.0206619	1.68483
ENSMUSG00000000827_Tpd52l2	75.6931	0.567034	0.325547	1.74179	0.0815458	0.192164	0.716327
ENSMUSG00000000838_Fmr1	251.924	0.266991	0.211021	1.26523	0.205789	0.349097	0.457054
ENSMUSG00000000861_Bcl11a	149.575	0.210422	0.254673	0.826245	0.408665	0.551127	0.258748
ENSMUSG00000000869_Il4	0.62712	-0.643976	0.655002	-0.983167	0.325525	1	0
ENSMUSG00000000876_Pxmp4	16.9715	-0.14292	0.57797	-0.24728	0.804692	0.86921	0.0608753
ENSMUSG00000000881_Dlg3	125.777	0.487031	0.267089	1.82348	0.0682312	0.172088	0.76425
ENSMUSG00000000884_Gnb1l	8.46065	-1.53924	0.69346	-2.21964	0.0264429	0.0953266	1.02079
ENSMUSG00000000889_Dbh	3.52389	-0.966768	0.845241	-1.14378	0.252716	0.40153	0.396282
ENSMUSG00000000901_Mmp11	7.52505	-1.60249	0.743008	-2.15676	0.031024	0.105216	0.977918
ENSMUSG00000000902_Smarcb1	214.153	-0.36909	0.259162	-1.42416	0.154399	0.28963	0.538156
ENSMUSG00000000903_Vpreb3	1.11049	-1.02465	0.745431	-1.37458	0.169263	1	0
ENSMUSG00000000915_Hip1r	133.546	0.0650038	0.263647	0.246556	0.805252	0.869523	0.060719
ENSMUSG00000000916_Nsun5	26.617	-0.128646	0.476978	-0.26971	0.787383	0.856698	0.0671722
ENSMUSG00000000934_Top1mt	16.0674	0.615366	0.564578	1.08996	0.275732	0.424565	0.372055
ENSMUSG00000000938_Hoxa10	4.02565	-1.57993	0.832805	-1.89712	0.0578116	0.15486	0.810059
ENSMUSG00000000942_Hoxa4	1.65646	0.20797	0.823658	0.252496	0.800658	1	0
ENSMUSG00000000948_Gm38393	206.924	0.621896	0.280654	2.21588	0.0266998	0.0958838	1.01825
ENSMUSG00000000957_Mmp14	33.3085	-0.160025	0.42964	-0.372464	0.709548	0.800211	0.0967955
ENSMUSG00000000958_Slc7a7	2.97566	-0.477287	0.844881	-0.564917	0.57213	0.693351	0.159047
ENSMUSG00000000959_Oxa1l	37.4484	0.014498	0.414076	0.0350129	0.972069	0.983381	0.00727797
ENSMUSG00000000976_Heatr6	39.8788	0.070781	0.407481	0.173704	0.862098	0.909885	0.0410135
ENSMUSG00000000982_Ccl3	0.441153	0.277164	0.609813	0.454506	0.649464	1	0
ENSMUSG00000000983_Wfdc18	0.774172	-0.492939	0.721115	-0.683579	0.494241	1	0
ENSMUSG00000001014_Icam4	1.14282	-0.434	0.768919	-0.564429	0.572462	1	0
ENSMUSG00000001016_Ilf2	96.6633	0.193271	0.306057	0.631487	0.527722	0.655628	0.183343
ENSMUSG00000001017_Chtop	98.1199	0.759067	0.290655	2.61158	0.00901255	0.0498276	1.30253
ENSMUSG00000001018_Snapin	54.5218	1.10939	0.384748	2.88342	0.00393385	0.0306297	1.51386
ENSMUSG00000001021_S100a3	23.9679	-2.65747	0.574328	-4.6271	3.71e-06	0.000423648	3.37299
ENSMUSG00000001025_S100a6	7.09467	-0.0338629	0.728156	-0.046505	0.962908	0.97783	0.00973685
ENSMUSG00000001027_Scn4a	17.6844	-2.87505	0.616652	-4.66235	3.13e-06	0.000385105	3.41442
ENSMUSG00000001029_Icam2	4.88146	-0.519393	0.789808	-0.657619	0.510783	0.641591	0.192741
ENSMUSG00000001034_Mapk7	34.8758	-0.646872	0.424792	-1.5228	0.12781	0.25551	0.592591
ENSMUSG00000001036_Epn2	73.6566	0.916319	0.379003	2.41771	0.0156187	0.0687199	1.16292
ENSMUSG00000001039_B9d1	7.93554	0.0856435	0.703025	0.121821	0.903041	0.938065	0.0277671
ENSMUSG00000001052_Sec24b	112.145	0.533592	0.291544	1.83023	0.0672154	0.170525	0.768211
ENSMUSG00000001053_N4bp3	40.5873	-0.148451	0.426466	-0.348095	0.727769	0.81222	0.0903261
ENSMUSG00000001054_Rmnd5b	32.9608	0.848427	0.476566	1.78029	0.0750282	0.182641	0.738403
ENSMUSG00000001056_Nhp2	19.1082	0.394904	0.533134	0.740721	0.458863	0.596214	0.224598
ENSMUSG00000001062_Vps9d1	37.5289	-0.175025	0.429183	-0.40781	0.683413	0.779892	0.107966
ENSMUSG00000001065_Zfp276	27.4814	-0.427977	0.452014	-0.946822	0.34373	0.490806	0.30909
ENSMUSG00000001082_Mfsd10	12.7695	-1.02647	0.618305	-1.66013	0.0968879	0.213789	0.670014
ENSMUSG00000001089_Luzp1	354.015	0.335274	0.199932	1.67694	0.0935538	0.209294	0.679242
ENSMUSG00000001095_Slc13a2	6.57244	-2.68019	0.770045	-3.48057	0.000500356	0.00871706	2.05963
ENSMUSG00000001098_Kctd10	26.9848	0.0946906	0.478001	0.198097	0.842969	0.897399	0.0470144
ENSMUSG00000001100_Poldip2	58.3587	0.656948	0.362669	1.81143	0.0700748	0.17496	0.757061
ENSMUSG00000001103_Sebox	10.9227	-1.08746	0.662957	-1.64032	0.100939	0.219077	0.659404
ENSMUSG00000001105_Ift20	56.6231	0.569189	0.359068	1.58518	0.112925	0.235243	0.628483
ENSMUSG00000001119_Col6a1	16.6777	-0.466546	0.559889	-0.833282	0.404685	0.547994	0.261224
ENSMUSG00000001120_Pcbp3	41.7452	0.521434	0.416576	1.25171	0.210675	0.354474	0.450415
ENSMUSG00000001123_Lgals9	3.51391	0.364464	0.822057	0.443356	0.657508	0.760276	0.119029
ENSMUSG00000001127_Araf	132.682	0.673399	0.250227	2.69116	0.00712048	0.0430412	1.36612
ENSMUSG00000001128_Cfp	5.10203	0.436805	0.80938	0.539678	0.589419	0.707176	0.150472
ENSMUSG00000001131_Timp1	0.444137	-0.0452832	0.632731	-0.0715678	0.942946	1	0
ENSMUSG00000001134_Uxt	5.7989	1.20208	0.793186	1.51551	0.129643	0.258194	0.588054
ENSMUSG00000001138_Cnnm3	27.7855	0.554981	0.464769	1.1941	0.232438	0.378727	0.421673
ENSMUSG00000001143_Lman2l	62.8654	0.207809	0.337216	0.616249	0.53773	0.664583	0.177451
ENSMUSG00000001150_Mcm3ap	78.9078	0.395068	0.312876	1.2627	0.206698	0.350064	0.455852
ENSMUSG00000001151_Pcnt	215.65	0.218176	0.22267	0.979815	0.327177	0.475053	0.323258
ENSMUSG00000001155_Ftcd	5.25398	-2.18427	0.810138	-2.69617	0.00701426	0.0426915	1.36966
ENSMUSG00000001156_Mxd1	60.5496	-0.197796	0.330845	-0.597852	0.549939	0.674691	0.170895
ENSMUSG00000001157_Gmcl1	54.1852	-0.301566	0.375153	-0.803848	0.421485	0.562277	0.25005
ENSMUSG00000001158_Snrnp27	155.745	-0.115664	0.308993	-0.374327	0.708161	0.799259	0.0973126
ENSMUSG00000001166_Oas1c	1.30886	-1.18943	0.77281	-1.5391	0.123781	1	0
ENSMUSG00000001168_Oas1h	1.5088	-1.3369	0.79226	-1.68746	0.0915155	1	0
ENSMUSG00000001173_Ocrl	166.741	0.333526	0.25832	1.29113	0.196657	0.338997	0.469805
ENSMUSG00000001175_Calm1	3008.94	0.810719	0.158923	5.10132	3.37e-07	0.000106203	3.97386
ENSMUSG00000001211_Agpat3	254.963	0.751728	0.215627	3.48624	0.000489868	0.00857865	2.06658
ENSMUSG00000001225_Slc26a3	6.58873	-1.78844	0.783167	-2.2836	0.022395	0.0858906	1.06605
ENSMUSG00000001227_Sema6b	31.5546	0.401474	0.45579	0.880831	0.378409	0.523644	0.280964
ENSMUSG00000001228_Uhrf1	4.15524	-0.707468	0.832652	-0.849656	0.395516	0.538968	0.268437
ENSMUSG00000001229_Dpp9	31.0121	0.470538	0.460883	1.02095	0.307278	0.456116	0.340925
ENSMUSG00000001240_Ramp2	28.528	-0.237521	0.468784	-0.506675	0.612383	0.725201	0.139542
ENSMUSG00000001247_Lsr	11.1937	-0.54668	0.684991	-0.798083	0.424822	0.565502	0.247566
ENSMUSG00000001248_Gramd1a	68.69	0.0655159	0.327602	0.199987	0.841491	0.896327	0.0475334
ENSMUSG00000001249_Hpn	6.16394	-2.17048	0.783602	-2.76987	0.0056078	0.0377543	1.42303
ENSMUSG00000001260_Gabrg1	57.4108	0.611584	0.342046	1.78802	0.0737733	0.180614	0.743249
ENSMUSG00000001270_Ckb	1240.05	0.884311	0.17743	c	6.23e-07	0.00014975	3.82463
ENSMUSG00000001280_Sp1	111.851	-0.489879	0.269905	-1.815	0.0695238	0.174013	0.759417
ENSMUSG00000001281_Itgb7	2.19547	0.568805	0.848439	0.670414	0.502594	0.634578	0.197515
ENSMUSG00000001285_Myg1	26.8637	0.996098	0.507112	1.96425	0.0495007	0.140736	0.851594
ENSMUSG00000001288_Rarg	12.1102	-0.163482	0.658721	-0.24818	0.803995	0.868747	0.0611069
ENSMUSG00000001289_Pfdn5	90.512	0.554966	0.306139	1.81279	0.069864	0.174552	0.758075
ENSMUSG00000001300_Efnb2	114.063	0.312856	0.281511	1.11134	0.266421	0.415075	0.381874
ENSMUSG00000001305_Rrp15	30.5846	-0.104186	0.437385	-0.238202	0.811725	0.874667	0.0581574
ENSMUSG00000001313_Rnd2	61.2914	0.271949	0.353869	0.768501	0.44219	0.581425	0.235506
ENSMUSG00000001323_Srr	88.0548	0.39248	0.309612	1.26765	0.204923	0.348314	0.458029
ENSMUSG00000001333_Sync	7.91427	-2.79993	0.75994	-3.68441	0.000229234	0.00541006	2.2668
ENSMUSG00000001334_Fndc5	173.625	0.648105	0.230094	2.81669	0.00485209	0.0345018	1.46216
ENSMUSG00000001348_Acp5	2.81704	-1.338	0.845497	-1.5825	0.113536	0.236154	0.626805
ENSMUSG00000001349_Cnn1	2.16826	-1.13584	0.841635	-1.34956	0.177157	0.316432	0.49972
ENSMUSG00000001366_Fbxo9	62.003	0.800006	0.331336	2.41449	0.0157574	0.0690263	1.16099
ENSMUSG00000001376_Vps50	97.5926	0.451678	0.311168	1.45156	0.146625	0.279882	0.553025
ENSMUSG00000001380_Hars	84.5189	0.812459	0.298821	2.71888	0.00655033	0.0409697	1.38754
ENSMUSG00000001383_Zmat2	273.375	0.302298	0.201392	1.50104	0.133344	0.26279	0.58039
ENSMUSG00000001403_Ube2c	8.96856	-1.74458	0.780091	-2.23638	0.0253266	0.0929369	1.03181
ENSMUSG00000001415_Smg5	102.592	0.174234	0.279418	0.623562	0.532915	0.660163	0.180349
ENSMUSG00000001416_Cct3	111.757	0.637419	0.279466	2.28085	0.0225573	0.0861423	1.06478
ENSMUSG00000001418_Glmp	51.6385	-0.614458	0.369081	-1.66483	0.095946	0.212734	0.672163
ENSMUSG00000001419_Mef2d	162.356	0.526956	0.251764	2.09306	0.0363441	0.115705	0.936648
ENSMUSG00000001420_Tmem79	4.17173	-1.44863	0.832678	-1.73973	0.0819068	0.192641	0.715251
ENSMUSG00000001424_Snd1	72.3899	0.349343	0.323687	1.07926	0.280472	0.430197	0.366333
ENSMUSG00000001435_Col18a1	313.533	0.425039	0.236122	1.80008	0.0718476	0.177702	0.750307
ENSMUSG00000001436_Slc19a1	15.4763	-0.32545	0.574749	-0.566248	0.571225	0.692834	0.159371
ENSMUSG00000001440_Kpnb1	220.553	0.581337	0.223226	2.60425	0.00920745	0.0504943	1.29676
ENSMUSG00000001441_Npepps	194.071	0.614759	0.22957	2.67787	0.00740927	0.0442414	1.35417
ENSMUSG00000001444_Tbx21	6.30671	-2.73015	0.810289	-3.36935	0.00075345	0.0111307	1.95348
ENSMUSG00000001445_Mrpl10	23.3491	0.310823	0.51755	0.600566	0.548129	0.673175	0.171872
ENSMUSG00000001467_Cyp51	70.5383	0.588136	0.358038	1.64266	0.100453	0.218279	0.660988
ENSMUSG00000001472_Tcf25	423.43	0.593403	0.180789	3.28231	0.00102962	0.0134601	1.87095
ENSMUSG00000001473_Tubb6	3.8523	-0.460691	0.815321	-0.565042	0.572045	0.69328	0.159091
ENSMUSG00000001482_Def8	65.7871	0.891738	0.351731	2.53529	0.0112356	0.056471	1.24817
ENSMUSG00000001493_Meox1	4.1846	-1.17599	0.827434	-1.42125	0.155244	0.290483	0.536879
ENSMUSG00000001494_Sost	7.61888	-2.25357	0.77587	-2.90457	0.00367762	0.0293154	1.5329
ENSMUSG00000001496_Nkx2-1	6.25793	-0.89053	0.822511	-1.0827	0.278943	0.42828	0.368273
ENSMUSG00000001497_Pax9	16.6939	-2.34036	0.595696	-3.92879	8.54e-05	0.00307005	2.51285
ENSMUSG00000001504_Irx2	8.9639	-0.60753	0.679438	-0.894165	0.371233	0.516775	0.286699
ENSMUSG00000001506_Col1a1	11.0434	-1.34596	0.662015	-2.03313	0.0420393	0.126919	0.896472
ENSMUSG00000001507_Itga3	60.4491	0.4227	0.381222	1.1088	0.267515	0.416081	0.380822
ENSMUSG00000001508_Sgca	2.85156	-1.5541	0.849098	-1.83029	0.0672062	0.170518	0.768229
ENSMUSG00000001510_Dlx3	10.0993	-1.29077	0.707915	-1.82333	0.0682528	0.172108	0.764198
ENSMUSG00000001517_Foxm1	18.5118	-2.27178	0.615109	-3.6933	0.000221366	0.00527526	2.27776
ENSMUSG00000001518_Itfg2	48.495	0.071924	0.366855	0.196056	0.844567	0.898429	0.0465164
ENSMUSG00000001520_Nrip2	28.6018	-0.396089	0.45074	-0.878752	0.379536	0.524488	0.280265
ENSMUSG00000001521_Tulp3	79.5688	0.0584727	0.299107	0.195491	0.845009	0.898644	0.0464123
ENSMUSG00000001524_Gtf2h4	22.1191	-0.264891	0.500333	-0.52943	0.596507	0.712563	0.147177
ENSMUSG00000001525_Tubb5	157.754	0.555033	0.247953	2.23847	0.0251907	0.0925966	1.0334
ENSMUSG00000001542_Ell2	48.6451	0.445019	0.405518	1.09741	0.272463	0.421216	0.375495
ENSMUSG00000001552_Jup	77.3686	0.505022	0.335545	1.50508	0.132304	0.261733	0.582141
ENSMUSG00000001555_Fkbp10	9.55222	-0.0218578	0.675921	-0.0323377	0.974203	0.984421	0.00681915
ENSMUSG00000001558_Klhl10	2.0777	-0.528576	0.84539	-0.625245	0.53181	0.659279	0.180931
ENSMUSG00000001566_Mnx1	2.86522	-1.44411	0.848086	-1.70279	0.088608	0.202082	0.694472
ENSMUSG00000001569_Nom1	102.047	0.0833093	0.268787	0.309945	0.756603	0.83325	0.0792244
ENSMUSG00000001576_Ergic1	120.558	0.495946	0.275675	1.79903	0.0720144	0.177944	0.749716
ENSMUSG00000001583_Tnk1	1.25597	-0.846176	0.786482	-1.0759	0.281972	1	0
ENSMUSG00000001588_Acap1	20.068	-2.61424	0.587312	-4.4512	8.54e-06	0.000743896	3.12849
ENSMUSG00000001604_Tcea3	0.244279	0.139894	0.605779	0.230932	0.817367	1	0
ENSMUSG00000001622_Csn3	7.7801	-1.55425	0.776977	-2.00038	0.0454592	0.133492	0.874544
ENSMUSG00000001627_Ifrd1	66.9617	0.0280946	0.338676	0.0829543	0.933888	0.958387	0.0184592
ENSMUSG00000001630_Stk38l	58.3213	0.666936	0.362073	1.84199	0.0654761	0.16799	0.774716
ENSMUSG00000001632_Brpf1	122.425	0.253849	0.271562	0.934772	0.349906	0.496986	0.303656
ENSMUSG00000001642_Akr1b3	35.396	-0.437688	0.50093	-0.873751	0.382254	0.526875	0.278293
ENSMUSG00000001655_Hoxc13	3.32598	-2.19077	0.845949	-2.58972	0.0096055	0.0516999	1.28651
ENSMUSG00000001656_Hoxc11	9.16355	-1.64228	0.746807	-2.19906	0.0278733	0.0985354	1.00641
ENSMUSG00000001657_Hoxc8	10.9408	-1.82246	0.757326	-2.40644	0.0161088	0.069866	1.15573
ENSMUSG00000001661_Hoxc6	11.7614	-1.85657	0.697384	-2.66219	0.00776339	0.0455656	1.34136
ENSMUSG00000001663_Gstt1	12.4606	-0.440504	0.637328	-0.691173	0.489457	0.622679	0.205736
ENSMUSG00000001665_Gstt3	17.5788	-2.47452	0.678479	-3.64716	0.000265158	0.00593251	2.22676
ENSMUSG00000001666_Ddt	67.2566	0.456354	0.408163	1.11807	0.263538	0.41238	0.384702
ENSMUSG00000001670_Tat	1.57629	-1.00464	0.833796	-1.2049	0.228242	1	0
ENSMUSG00000001672_Marveld3	6.74403	-1.70244	0.767381	-2.21851	0.0265202	0.0954718	1.02012
ENSMUSG00000001674_Ddx18	28.3334	0.671098	0.496986	1.35034	0.176908	0.316178	0.500069
ENSMUSG00000001687_Ubl3	545.644	0.501128	0.185587	2.70023	0.00692924	0.0423479	1.37317
ENSMUSG00000001700_Gramd3	29.5775	0.451392	0.464529	0.971719	0.331191	0.478646	0.319986
ENSMUSG00000001707_Eef1e1	13.83	0.561756	0.62191	0.903275	0.36638	0.512186	0.290572
ENSMUSG00000001729_Akt1	61.3205	0.807402	0.367765	2.19543	0.0281326	0.099152	1.0037
ENSMUSG00000001739_Cldn15	2.45498	-1.03044	0.847561	-1.21577	0.224074	0.369649	0.43221
ENSMUSG00000001741_Il16	154.099	0.601726	0.263978	2.27945	0.0226403	0.0862801	1.06409
ENSMUSG00000001750_Tcirg1	6.42628	-0.60458	0.73571	-0.821764	0.411211	0.553548	0.256844
ENSMUSG00000001751_Naglu	8.5732	-0.902063	0.720918	-1.25127	0.210836	0.354628	0.450227
ENSMUSG00000001755_Coasy	14.195	-0.274198	0.620838	-0.441658	0.658737	0.761219	0.11849
ENSMUSG00000001761_Smo	48.9608	-0.0301939	0.370626	-0.0814673	0.93507	0.95899	0.0181858
ENSMUSG00000001763_Tspan33	23.8275	0.13617	0.489717	0.278058	0.780968	0.851656	0.0697359
ENSMUSG00000001767_Crnkl1	103.199	0.43369	0.274719	1.57867	0.114412	0.237346	0.624618
ENSMUSG00000001768_Rin2	26.3988	0.114148	0.486381	0.234688	0.814451	0.876837	0.0570811
ENSMUSG00000001773_Folh1	33.8415	0.580566	0.463698	1.25204	0.210557	0.354322	0.450602
ENSMUSG00000001774_Chordc1	126.275	0.513143	0.265616	1.9319	0.0533721	0.147523	0.831139
ENSMUSG00000001783_Rtcb	160.957	0.378286	0.234543	1.61286	0.106774	0.227196	0.643598
ENSMUSG00000001785_Pwp1	30.0884	1.19909	0.467619	2.56424	0.0103403	0.0540773	1.26698
ENSMUSG00000001786_Fbxo7	52.666	-0.126356	0.348674	-0.362389	0.717061	0.804948	0.0942322
ENSMUSG00000001794_Capns1	87.9117	0.27691	0.296009	0.935477	0.349542	0.496579	0.304011
ENSMUSG00000001802_Lrp3	35.4169	0.448568	0.435457	1.03011	0.30296	0.451884	0.344973
ENSMUSG00000001804_Dsg4	8.19685	-1.62011	0.779345	-2.07881	0.0376347	0.118167	0.927503
ENSMUSG00000001815_Evx2	3.88358	-1.41101	0.843126	-1.67355	0.0942193	0.210221	0.677325
ENSMUSG00000001819_Hoxd13	4.46537	-0.796494	0.81544	-0.976765	0.328685	0.476519	0.32192
ENSMUSG00000001823_Hoxd12	3.57239	-1.31761	0.838546	-1.57131	0.116111	0.239543	0.620617
ENSMUSG00000001827_Folr1	4.11893	-1.27049	0.821631	-1.54631	0.122031	0.247678	0.606112
ENSMUSG00000001829_Clpb	55.8306	0.381603	0.356672	1.0699	0.284666	0.434179	0.362331
ENSMUSG00000001833_Sept7	1765.28	0.267875	0.177364	1.51031	0.130964	0.259911	0.585175
ENSMUSG00000001844_Zdhhc4	22.1897	-0.134401	0.493086	-0.272571	0.785183	0.855061	0.068003
ENSMUSG00000001847_Rac1	306.764	0.908899	0.223525	4.0662	4.78e-05	0.00214569	2.66843
ENSMUSG00000001855_Nup214	80.9656	-0.26412	0.323262	-0.817044	0.413903	0.555868	0.255028
ENSMUSG00000001864_Aif1l	16.8288	-0.957049	0.563636	-1.69799	0.0895092	0.203436	0.691571
ENSMUSG00000001865_Cpa3	2.0813	-1.68949	0.824164	-2.04994	0.0403703	0.123644	0.907826
ENSMUSG00000001870_Ltbp1	40.064	-1.125	0.442016	-2.54516	0.0109228	0.0557643	1.25364
ENSMUSG00000001891_Ugp2	76.116	0.850981	0.322396	2.63955	0.00830157	0.0472899	1.32523
ENSMUSG00000001901_Kcnh6	5.9981	-1.46796	0.774936	-1.89429	0.0581863	0.155519	0.808217
ENSMUSG00000001909_Trmt1	37.8465	-0.000377031	0.418456	-0.000901004	0.999281	0.999436	0.000244816
ENSMUSG00000001910_Nacc1	164.021	0.711655	0.251916	2.82497	0.00472848	0.0340543	1.46783
ENSMUSG00000001911_Nfix	269.914	0.440314	0.237413	1.85463	0.0636492	0.164946	0.782658
ENSMUSG00000001918_Slc1a5	11.6042	-2.54578	0.660495	-3.85435	0.000116037	0.00366254	2.43622
ENSMUSG00000001924_Uba1	287.156	1.02907	0.203627	5.05369	4.33e-07	0.000119032	3.92434
ENSMUSG00000001930_Vwf	31.6262	-1.95622	0.583838	-3.35062	0.000806307	0.0116432	1.93393
ENSMUSG00000001942_Siae	15.2595	-0.187377	0.587934	-0.318704	0.749951	0.828151	0.0818907
ENSMUSG00000001943_Vsig2	0.65443	-0.667739	0.661464	-1.00949	0.312741	1	0
ENSMUSG00000001946_Esam	9.56428	-0.676926	0.67635	-1.00085	0.316898	0.46506	0.332491
ENSMUSG00000001948_Spa17	4.48753	0.36514	0.805674	0.453211	0.650397	0.755029	0.122036
ENSMUSG00000001962_Fam50a	50.9083	-0.280174	0.354241	-0.790911	0.428996	0.569268	0.244683
ENSMUSG00000001964_Emd	22.2191	0.00403119	0.534406	0.00754332	0.993981	0.99625	0.00163154
ENSMUSG00000001983_Taco1	21.1616	0.584376	0.508094	1.15014	0.250088	0.398754	0.399295
ENSMUSG00000001985_Grik3	122.621	-0.00633499	0.252387	-0.0251004	0.979975	0.987867	0.00530164
ENSMUSG00000001986_Gria3	630.144	0.660843	0.209537	3.15383	0.00161145	0.0176372	1.75357
ENSMUSG00000001988_Npas1	0.881677	-0.855501	0.709776	-1.20531	0.228083	1	0
ENSMUSG00000001995_Sipa1l2	54.0193	-0.0692533	0.364261	-0.19012	0.849215	0.901558	0.0450065
ENSMUSG00000001998_Ap4e1	39.9144	0.156284	0.430472	0.363053	0.716565	0.804758	0.0943347
ENSMUSG00000001999_Blvra	19.4098	0.963218	0.540973	1.78053	0.0749894	0.182604	0.738489
ENSMUSG00000002006_Pdzd4	56.978	0.5038	0.346368	1.45452	0.145802	0.278818	0.554679
ENSMUSG00000002007_Srpk3	4.01276	-0.609714	0.834148	-0.730942	0.464815	0.601707	0.220615
ENSMUSG00000002010_Idh3g	96.4811	1.00563	0.292686	3.43586	0.000590674	0.00966975	2.01458
ENSMUSG00000002012_Pnck	6.37478	1.4497	0.777064	1.86561	0.0620958	0.162355	0.789535
ENSMUSG00000002014_Ssr4	34.4709	0.0923829	0.463058	0.199506	0.841867	0.896489	0.0474551
ENSMUSG00000002015_Bcap31	48.8471	0.612536	0.384104	1.59472	0.110776	0.232247	0.63405
ENSMUSG00000002017_Fam98a	56.8254	-0.0774219	0.365412	-0.211876	0.832204	0.889791	0.050712
ENSMUSG00000002020_Ltbp2	19.5654	-0.417554	0.544004	-0.767557	0.44275	0.581749	0.235264
ENSMUSG00000002028_Kmt2a	513.54	0.387832	0.192663	2.01301	0.0441139	0.130947	0.882904
ENSMUSG00000002031_Ift46	64.0092	0.147627	0.335213	0.440398	0.659649	0.761932	0.118084
ENSMUSG00000002032_Tmem25	63.4478	0.23045	0.326236	0.70639	0.479945	0.614943	0.211165
ENSMUSG00000002033_Cd3g	0.537985	-0.470718	0.626119	-0.751802	0.45217	1	0
ENSMUSG00000002043_Trappc6a	4.97004	0.158901	0.817055	0.19448	0.8458	0.899181	0.0461527
ENSMUSG00000002052_Supt6	627.722	0.349232	0.194573	1.79486	0.0726756	0.179064	0.746992
ENSMUSG00000002055_Spag5	114.112	0.592876	0.284238	2.08584	0.0369929	0.11692	0.932111
ENSMUSG00000002057_Foxn1	8.58742	-2.53616	0.739576	-3.42921	0.000605336	0.00980653	2.00848
ENSMUSG00000002058_Unc119	15.4587	-0.857464	0.610285	-1.40502	0.160015	0.296563	0.527882
ENSMUSG00000002059_Rab34	19.7135	-0.378029	0.541638	-0.697936	0.485217	0.619086	0.208249
ENSMUSG00000002064_Sdf2	27.856	0.759068	0.468273	1.62099	0.105019	0.224628	0.648536
ENSMUSG00000002068_Ccne1	19.7893	0.140369	0.521923	0.268947	0.787971	0.857265	0.0668848
ENSMUSG00000002076_Hsf2bp	5.49982	-1.93898	0.783853	-2.47365	0.0133739	0.0628621	1.20161
ENSMUSG00000002083_Bbc3	1.86369	-0.672821	0.845576	-0.795695	0.426209	1	0
ENSMUSG00000002100_Mybpc3	25.1156	0.320978	0.501014	0.640657	0.521746	0.650645	0.186656
ENSMUSG00000002102_Psmc3	208.022	0.556015	0.229053	2.42745	0.0152054	0.0674852	1.17079
ENSMUSG00000002103_Acp2	111.448	0.398328	0.261289	1.52447	0.127391	0.254969	0.593512
ENSMUSG00000002105_Slc39a13	44.8992	-0.284233	0.388795	-0.73106	0.464742	0.601674	0.220639
ENSMUSG00000002107_Celf2	468.575	0.504105	0.200697	2.51177	0.0120128	0.0588027	1.2306
ENSMUSG00000002108_Nr1h3	5.95512	-0.070028	0.74571	-0.0939078	0.925182	0.9529	0.0209529
ENSMUSG00000002109_Ddb2	11.3452	0.435775	0.639078	0.681881	0.495314	0.627966	0.202064
ENSMUSG00000002111_Spi1	4.26416	-1.51715	0.828465	-1.83128	0.0670584	0.170338	0.768687
ENSMUSG00000002129_Sf3a1	167.26	0.473814	0.235581	2.01125	0.0442986	0.131284	0.881789
ENSMUSG00000002147_Stat6	7.57033	0.411891	0.72315	0.569579	0.568964	0.690627	0.160756
ENSMUSG00000002190_Clgn	23.554	-0.138381	0.507109	-0.272883	0.784943	0.854872	0.0680988
ENSMUSG00000002204_Napsa	2.9295	-1.06619	0.844669	-1.26226	0.206856	0.350217	0.455663
ENSMUSG00000002205_Vrk3	33.9273	-0.923782	0.424889	-2.17417	0.0296921	0.102242	0.990372
ENSMUSG00000002210_Smg9	39.6165	-0.619583	0.414853	-1.4935	0.135306	0.265501	0.575933
ENSMUSG00000002221_Paxip1	65.7334	-0.436528	0.334127	-1.30647	0.191392	0.333056	0.477483
ENSMUSG00000002222_Rmnd5a	227.981	0.996904	0.287954	3.46202	0.000536132	0.00913689	2.0392
ENSMUSG00000002227_Mov10	12.3158	-1.46138	0.642887	-2.27314	0.0230176	0.0872288	1.05934
ENSMUSG00000002228_Ppm1j	7.44516	-1.48396	0.772031	-1.92215	0.0545871	0.149448	0.825509
ENSMUSG00000002233_Rhoc	17.9162	-0.581634	0.554331	-1.04925	0.294061	0.443375	0.353228
ENSMUSG00000002240_Prr27	4.72432	-0.533092	0.82536	-0.645891	0.51835	0.648227	0.188273
ENSMUSG00000002249_Tead3	4.35034	-0.573722	0.794911	-0.721744	0.470452	0.606724	0.217009
ENSMUSG00000002250_Ppard	44.2628	0.29485	0.386289	0.763288	0.445292	0.58416	0.233468
ENSMUSG00000002257_Def6	2.80987	-0.560594	0.843599	-0.664526	0.506354	0.637785	0.195326
ENSMUSG00000002265_Peg3	1509.43	0.313071	0.15768	1.98549	0.0470903	0.136303	0.865494
ENSMUSG00000002266_Zim1	34.6582	-0.859235	0.445537	-1.92854	0.0537882	0.148312	0.828823
ENSMUSG00000002274_Metrn	49.1115	0.461737	0.375842	1.22854	0.219243	0.364357	0.438473
ENSMUSG00000002279_Lmf1	50.9444	-1.30529	0.368164	-3.54539	0.000392025	0.00747701	2.12627
ENSMUSG00000002280_Narfl	30.112	-0.431063	0.440874	-0.977746	0.3282	0.476083	0.322318
ENSMUSG00000002289_Angptl4	9.21888	-1.12201	0.684455	-1.63928	0.101155	0.219288	0.658984
ENSMUSG00000002297_Dbf4	14.5383	-1.3469	0.621044	-2.16876	0.0301008	0.103142	0.986566
ENSMUSG00000002307_Daxx	36.0161	-0.505216	0.432275	-1.16874	0.242509	0.390528	0.408348
ENSMUSG00000002308_Cd320	15.1397	-0.780505	0.603234	-1.29387	0.195711	0.337884	0.471232
ENSMUSG00000002319_Ipo4	54.715	0.764359	0.369138	2.07066	0.0383905	0.119812	0.9215
ENSMUSG00000002320_Tm9sf1	57.8127	-0.24948	0.358537	-0.695829	0.486536	0.620339	0.207371
ENSMUSG00000002324_Rec8	5.63314	-1.46986	0.795481	-1.84776	0.0646372	0.16677	0.777882
ENSMUSG00000002325_Irf9	20.6506	-0.740409	0.506877	-1.46073	0.14409	0.276579	0.55818
ENSMUSG00000002326_Gmpr2	17.1824	-0.259647	0.576054	-0.450734	0.652181	0.756522	0.121178
ENSMUSG00000002329_Mdp1	26.7951	0.339911	0.472418	0.719514	0.471824	0.607886	0.216178
ENSMUSG00000002332_Dhrs1	50.4099	0.0118825	0.370126	0.0321039	0.974389	0.984494	0.00678702
ENSMUSG00000002341_Ncan	31.12	-0.203725	0.442639	-0.46025	0.645337	0.751046	0.124333
ENSMUSG00000002342_Tmem161a	26.7605	-0.552553	0.510569	-1.08223	0.27915	0.428525	0.368023
ENSMUSG00000002343_Armc6	12.6369	-0.598033	0.637768	-0.937697	0.3484	0.495393	0.30505
ENSMUSG00000002345_Borcs8	19.0904	0.90526	0.54588	1.65835	0.0972472	0.214326	0.668926
ENSMUSG00000002346_Slc25a42	34.6971	-0.178687	0.477387	-0.374302	0.70818	0.799259	0.0973126
ENSMUSG00000002365_Snx9	32.8252	0.698785	0.447153	1.56274	0.118113	0.242259	0.61572
ENSMUSG00000002372_Ranbp3	44.0635	0.141291	0.382328	0.369555	0.711714	0.801422	0.0961386
ENSMUSG00000002379_Ndufa11	65.1168	0.519598	0.350629	1.4819	0.138366	0.269456	0.569512
ENSMUSG00000002384_Bmp8b	3.68491	-1.43833	0.848373	-1.6954	0.0900003	0.204157	0.690035
ENSMUSG00000002393_Nr2f6	17.5461	1.0865	0.582225	1.86611	0.0620258	0.162254	0.789805
ENSMUSG00000002395_Use1	42.3493	0.0357659	0.399689	0.0894842	0.928697	0.955241	0.019887
ENSMUSG00000002396_Ocel1	31.9981	-1.01443	0.472938	-2.14496	0.0319559	0.10708	0.970293
ENSMUSG00000002409_Dyrk1b	21.4638	0.71742	0.516681	1.38852	0.164979	0.302208	0.519694
ENSMUSG00000002413_Braf	325.656	0.511597	0.205851	2.48528	0.0129449	0.0616308	1.2102
ENSMUSG00000002416_Ndufb2	74.466	0.232216	0.315937	0.735007	0.462335	0.599519	0.222197
ENSMUSG00000002428_Hltf	98.3594	0.614711	0.28141	2.1844	0.028933	0.100807	0.996508
ENSMUSG00000002455_Prpf6	146.66	0.442595	0.244563	1.80973	0.0703369	0.175445	0.755859
ENSMUSG00000002458_Rgs19	7.49343	0.0648425	0.723268	0.089652	0.928564	0.955201	0.0199053
ENSMUSG00000002459_Rgs20	24.6467	0.97468	0.493777	1.97393	0.04839	0.138928	0.857209
ENSMUSG00000002475_Abhd3	171.758	0.590728	0.266131	2.21969	0.0264401	0.0953266	1.02079
ENSMUSG00000002477_Snrpd1	68.4197	0.603031	0.336352	1.79286	0.072996	0.179494	0.745951
ENSMUSG00000002486_Tchp	70.0433	-0.465852	0.342216	-1.36128	0.173424	0.31227	0.505469
ENSMUSG00000002489_Tiam1	270.734	0.461562	0.232475	1.98543	0.0470967	0.136306	0.865483
ENSMUSG00000002496_Tsc2	103.616	0.797355	0.303876	2.62395	0.00869174	0.0486577	1.31285
ENSMUSG00000002504_Slc9a3r2	40.7977	0.783896	0.396242	1.97833	0.047892	0.137838	0.860631
ENSMUSG00000002524_Puf60	158.777	0.609448	0.267904	2.27488	0.0229133	0.0870383	1.06029
ENSMUSG00000002546_Golga2	226.534	0.16104	0.236557	0.680766	0.49602	0.628555	0.201656
ENSMUSG00000002550_Uck1	31.6735	-0.0185305	0.433593	-0.0427371	0.965911	0.979633	0.00893673
ENSMUSG00000002565_Scin	14.6546	-1.32701	0.596702	-2.22391	0.0261545	0.0948032	1.02318
ENSMUSG00000002578_Ikzf4	31.1081	-0.972838	0.488772	-1.99037	0.0465502	0.135414	0.868336
ENSMUSG00000002580_Mien1	19.1677	0.855318	0.55365	1.54487	0.122378	0.248181	0.605232
ENSMUSG00000002588_Pon1	2.14251	-1.15187	0.843262	-1.36596	0.17195	0.310743	0.507599
ENSMUSG00000002602_Axl	54.9634	0.841732	0.360332	2.33599	0.0194916	0.0784822	1.10523
ENSMUSG00000002603_Tgfb1	12.1755	-0.936222	0.701092	-1.33538	0.181753	0.321852	0.492344
ENSMUSG00000002608_Ccdc97	50.0157	0.0573971	0.364803	0.157337	0.874979	0.919308	0.0365387
ENSMUSG00000002617_Zfp40	43.0972	-0.112378	0.481219	-0.233529	0.815351	0.877513	0.0567463
ENSMUSG00000002625_Akap8l	160.199	0.186642	0.235276	0.793291	0.427608	0.568098	0.245577
ENSMUSG00000002633_Shh	26.2054	0.483035	0.487439	0.990966	0.321702	0.469825	0.328064
ENSMUSG00000002635_Pdcd2l	12.2154	-0.0523504	0.63764	-0.0821003	0.934567	0.958834	0.0182566
ENSMUSG00000002658_Gtf2f1	121.359	0.289799	0.289884	0.999709	0.317451	0.465486	0.332094
ENSMUSG00000002660_Clpp	27.9213	1.01173	0.470992	2.14809	0.0317064	0.106844	0.971251
ENSMUSG00000002661_Alkbh7	18.2459	0.303155	0.579746	0.522909	0.601037	0.716378	0.144858
ENSMUSG00000002664_Pspn	1.50941	0.110933	0.798494	0.138927	0.889507	1	0
ENSMUSG00000002668_Dennd1c	1.24005	-0.361223	0.799479	-0.451824	0.651396	1	0
ENSMUSG00000002679_Med6	19.1555	1.78796	0.595005	3.00495	0.00265623	0.0238377	1.62274
ENSMUSG00000002688_Prkd1	18.4561	0.189997	0.535217	0.35499	0.722597	0.808631	0.0922496
ENSMUSG00000002699_Lcp2	7.82619	-1.69474	0.75415	-2.24722	0.0246258	0.0911952	1.04003
ENSMUSG00000002718_Cse1l	108.449	0.900885	0.289703	3.10969	0.00187286	0.0192805	1.71488
ENSMUSG00000002728_Naa20	58.8342	0.682704	0.371976	1.83535	0.0664544	0.169477	0.770889
ENSMUSG00000002731_Prkra	16.7368	0.328353	0.558116	0.588324	0.556315	0.679832	0.167598
ENSMUSG00000002732_Fkbp7	8.2746	-1.24476	0.733043	-1.69807	0.089494	0.203436	0.691571
ENSMUSG00000002733_Plekha3	51.4957	1.09316	0.37866	2.88692	0.0038903	0.0304467	1.51646
ENSMUSG00000002741_Ykt6	46.8362	0.373855	0.378204	0.9885	0.322908	0.471025	0.326956
ENSMUSG00000002748_Baz1b	626.667	0.291618	0.16155	1.80512	0.0710558	0.176488	0.753286
ENSMUSG00000002763_Pex6	24.4153	0.748351	0.488977	1.53044	0.125907	0.253039	0.596813
ENSMUSG00000002767_Mrpl2	16.2242	0.43273	0.588187	0.7357	0.461913	0.599063	0.222528
ENSMUSG00000002768_Mea1	43.069	0.218533	0.38869	0.562229	0.57396	0.695079	0.157966
ENSMUSG00000002769_Gnmt	1.80859	-0.787748	0.842719	-0.934769	0.349907	1	0
ENSMUSG00000002771_Grin2d	14.6184	-0.123001	0.5899	-0.208511	0.83483	0.891565	0.049847
ENSMUSG00000002778_Kdelr1	19.1868	0.697587	0.54757	1.27397	0.202674	0.345721	0.461274
ENSMUSG00000002781_Tmem143	14.7992	-0.299793	0.588445	-0.509467	0.610425	0.723556	0.140528
ENSMUSG00000002791_Pdxk-ps	5.09473	-1.13431	0.780838	-1.45268	0.146313	0.279496	0.553625
ENSMUSG00000002797_Ggct	48.298	0.114024	0.373726	0.3051	0.76029	0.835956	0.0778166
ENSMUSG00000002799_Jag2	9.90149	-0.330486	0.690569	-0.478571	0.632244	0.740784	0.130309
ENSMUSG00000002803_Btbd6	19.0128	-0.107882	0.527503	-0.204515	0.837951	0.893679	0.0488186
ENSMUSG00000002804_Nudt14	3.33427	1.41671	0.844759	1.67706	0.0935307	0.209261	0.679312
ENSMUSG00000002808_Epdr1	77.4549	0.644158	0.343585	1.87482	0.0608181	0.159991	0.795903
ENSMUSG00000002812_Flii	112.427	0.605569	0.279007	2.17044	0.0299732	0.102855	0.987777
ENSMUSG00000002814_Top3a	15.5432	-0.206504	0.571176	-0.361541	0.717695	0.805414	0.0939806
ENSMUSG00000002820_Atg4d	17.0308	0.692288	0.589896	1.17358	0.240565	0.388244	0.410895
ENSMUSG00000002825_Qtrt1	2.31093	-0.0828946	0.84896	-0.0976425	0.922216	0.950793	0.0219142
ENSMUSG00000002831_Plin4	12.8441	-0.404458	0.627284	-0.644777	0.519071	0.648814	0.18788
ENSMUSG00000002833_Hdgfrp2	107.906	0.292163	0.290818	1.00463	0.315077	0.463531	0.333921
ENSMUSG00000002835_Chaf1a	10.79	-1.29624	0.723307	-1.7921	0.0731165	0.179704	0.745441
ENSMUSG00000002844_Adprh	50.8378	0.889997	0.381973	2.33	0.0198061	0.0793194	1.10062
ENSMUSG00000002845_Tmem39a	13.2514	-0.49726	0.612122	-0.812354	0.416589	0.558284	0.253145
ENSMUSG00000002846_Timmdc1	34.1522	0.567426	0.437843	1.29596	0.19499	0.337075	0.472274
ENSMUSG00000002847_Pla1a	0.62712	-0.643976	0.655002	-0.983167	0.325525	1	0
ENSMUSG00000002870_Mcm2	17.7618	-1.42673	0.555481	-2.56847	0.0102149	0.0536492	1.27044
ENSMUSG00000002871_Tpra1	27.1026	-0.216173	0.475333	-0.454782	0.649266	0.754123	0.122558
ENSMUSG00000002881_Nab1	142.85	0.85429	0.259691	3.28964	0.00100315	0.013289	1.87651
ENSMUSG00000002885_Adgre5	6.817	-0.0649443	0.740886	-0.0876577	0.930149	0.956108	0.0194932
ENSMUSG00000002897_Il17ra	40.4574	-0.803849	0.387871	-2.07246	0.0382222	0.119503	0.92262
ENSMUSG00000002900_Lamb1	110.97	0.202178	0.276236	0.731905	0.464227	0.601233	0.220957
ENSMUSG00000002908_Kcnn1	15.5746	-1.04618	0.607087	-1.72329	0.0848366	0.196668	0.706267
ENSMUSG00000002910_Arrdc2	5.53994	-0.402765	0.810311	-0.49705	0.619154	0.730718	0.13625
ENSMUSG00000002930_Ppp1r17	862.404	0.761644	0.211845	3.59528	0.000324042	0.00674712	2.17088
ENSMUSG00000002944_Cd36	1.25016	-0.818731	0.786443	-1.04106	0.297849	1	0
ENSMUSG00000002948_Map2k7	109.054	0.246252	0.270278	0.911107	0.362239	0.508407	0.293789
ENSMUSG00000002949_Timm44	116.269	0.413104	0.261212	1.58149	0.113766	0.236453	0.626254
ENSMUSG00000002957_Ap2a2	266.935	0.750865	0.21576	3.4801	0.000501231	0.00872054	2.05946
ENSMUSG00000002963_Pnkp	16.6624	0.0834028	0.589962	0.14137	0.887578	0.927876	0.0325101
ENSMUSG00000002968_Med25	57.5586	-0.0692952	0.34691	-0.19975	0.841676	0.896392	0.0475019
ENSMUSG00000002980_Bcam	3.79393	0.313878	0.814645	0.385294	0.700019	0.793023	0.100714
ENSMUSG00000002981_Clptm1	119.792	0.718476	0.273883	2.62329	0.00870846	0.0486987	1.31248
ENSMUSG00000002983_Relb	15.1926	-1.72729	0.60594	-2.85061	0.00436361	0.0323654	1.48992
ENSMUSG00000002984_Tomm40	59.4897	0.18209	0.35039	0.519679	0.603287	0.717771	0.144014
ENSMUSG00000002985_Apoe	2110.94	0.850789	0.203523	4.18031	2.91e-05	0.00153706	2.81331
ENSMUSG00000002992_Apoc2	0.881677	-0.855501	0.709776	-1.20531	0.228083	1	0
ENSMUSG00000002996_Hbp1	57.4701	0.773761	0.346551	2.23275	0.0255656	0.093456	1.02939
ENSMUSG00000002997_Prkar2b	39.8278	0.411213	0.405561	1.01394	0.310613	0.459399	0.33781
ENSMUSG00000003031_Cdkn1b	118.432	0.78502	0.261454	3.00252	0.00267755	0.0239459	1.62077
ENSMUSG00000003032_Klf4	15.0208	-1.50591	0.585175	-2.57344	0.0100693	0.0531971	1.27411
ENSMUSG00000003033_Ap1m1	71.7936	0.59919	0.313897	1.90888	0.056278	0.152327	0.817224
ENSMUSG00000003037_Rab8a	67.8568	0.187465	0.324134	0.578358	0.563023	0.685272	0.164137
ENSMUSG00000003038_Hmgn2	74.0924	0.291361	0.318287	0.915404	0.35998	0.506061	0.295797
ENSMUSG00000003039_Fam32a	154.53	-0.22677	0.298999	-0.758431	0.448193	0.586769	0.231533
ENSMUSG00000003051_Elf3	2.19635	-0.505263	0.849111	-0.595049	0.551811	0.676186	0.169934
ENSMUSG00000003053_Cyp2c29	5.31498	-1.13537	0.815487	-1.39226	0.163844	0.30096	0.521491
ENSMUSG00000003062_Stard3nl	38.2539	-0.240509	0.404184	-0.595048	0.551811	0.676186	0.169934
ENSMUSG00000003068_Stk11	59.6575	0.404848	0.367103	1.10282	0.270106	0.418927	0.377862
ENSMUSG00000003070_Efna2	7.46934	-0.386916	0.716655	-0.539892	0.589272	0.707108	0.150514
ENSMUSG00000003072_Atp5d	91.7928	0.869341	0.350173	2.4826	0.0130427	0.0618683	1.20853
ENSMUSG00000003099_Ppp5c	83.0291	0.499274	0.29633	1.68486	0.0920155	0.207272	0.68346
ENSMUSG00000003119_Cdk12	164.708	-0.104701	0.231162	-0.452934	0.650596	0.755192	0.121943
ENSMUSG00000003123_Lipe	20.3025	-0.563269	0.531057	-1.06066	0.288847	0.437994	0.358531
ENSMUSG00000003131_Pafah1b2	369.822	0.7684	0.199851	3.84487	0.000120615	0.00372705	2.42864
ENSMUSG00000003134_Tbc1d8	30.4566	0.177389	0.442035	0.401301	0.688199	0.784313	0.105511
ENSMUSG00000003135_Cnot11	31.0756	0.208912	0.438495	0.47643	0.633768	0.74191	0.129649
ENSMUSG00000003153_Slc2a3	180.611	0.438234	0.230246	1.90333	0.0569975	0.15339	0.814204
ENSMUSG00000003154_Foxj2	76.9903	0.285178	0.330182	0.863701	0.387752	0.532237	0.273895
ENSMUSG00000003161_Sri	98.7177	0.136988	0.284682	0.481196	0.630377	0.739133	0.131277
ENSMUSG00000003166_Dgcr2	122.022	0.362771	0.275139	1.3185	0.187337	0.328671	0.483239
ENSMUSG00000003184_Irf3	27.6031	-0.0449859	0.455153	-0.0988368	0.921268	0.95008	0.0222396
ENSMUSG00000003190_Bcl2l12	3.72003	-0.877845	0.828266	-1.05986	0.289209	0.438441	0.358089
ENSMUSG00000003198_Zfp959	7.14266	0.494604	0.719835	0.687108	0.492014	0.625194	0.203985
ENSMUSG00000003199_Mpnd	41.1455	0.0713026	0.408522	0.174538	0.861443	0.909507	0.0411941
ENSMUSG00000003200_Sh3gl1	25.2808	0.637843	0.500424	1.27461	0.202449	0.345429	0.461642
ENSMUSG00000003206_Ebi3	0.380577	-0.188905	0.604589	-0.312452	0.754697	1	0
ENSMUSG00000003208_Ccdc94	11.531	0.349858	0.628508	0.556648	0.577768	0.698477	0.155848
ENSMUSG00000003226_Ranbp2	654.737	0.683153	0.187053	3.65218	0.00026002	0.00585305	2.23262
ENSMUSG00000003227_Edar	2.34418	-0.989349	0.846828	-1.1683	0.242686	0.390667	0.408193
ENSMUSG00000003228_Grk5	41.0864	0.368474	0.391129	0.942079	0.346152	0.493147	0.307023
ENSMUSG00000003233_Dvl3	93.8467	0.467179	0.287363	1.62575	0.104003	0.223259	0.651191
ENSMUSG00000003234_Abcf3	75.0459	0.459232	0.312316	1.47041	0.141451	0.273445	0.563131
ENSMUSG00000003235_Eif2b5	57.1898	0.27259	0.355641	0.766474	0.443395	0.582477	0.234721
ENSMUSG00000003269_Cyth2	42.2629	-0.193907	0.432536	-0.448302	0.653935	0.757589	0.120567
ENSMUSG00000003271_Sult2b1	0.821418	-0.445613	0.697537	-0.638838	0.522928	1	0
ENSMUSG00000003273_Car11	35.1445	-0.00390353	0.427488	-0.0091313	0.992714	0.995452	0.00197977
ENSMUSG00000003279_Dlgap1	551.024	0.593681	0.174118	3.40965	0.000650456	0.0101877	1.99193
ENSMUSG00000003282_Plag1	22.4336	-1.17047	0.492792	-2.37518	0.0175405	0.073915	1.13127
ENSMUSG00000003283_Hck	2.35344	-1.62652	0.848298	-1.9174	0.0551876	0.150416	0.822706
ENSMUSG00000003299_Mrpl4	13.777	1.16601	0.624849	1.86606	0.0620329	0.162256	0.7898
ENSMUSG00000003308_Keap1	54.0582	0.0723752	0.351266	0.206041	0.836759	0.892849	0.0492219
ENSMUSG00000003309_Ap1m2	2.54617	-1.86637	0.834321	-2.23699	0.0252871	0.0928486	1.03222
ENSMUSG00000003316_Glg1	533.405	0.75684	0.18264	4.14389	3.41e-05	0.00169541	2.77072
ENSMUSG00000003341_Atp8b3	5.81927	-2.55727	0.820092	-3.11827	0.00181913	0.0188779	1.72405
ENSMUSG00000003344_Btbd2	35.2076	-0.280833	0.419905	-0.668802	0.503622	0.635612	0.196808
ENSMUSG00000003345_Csnk1g2	44.2217	0.455689	0.409106	1.11387	0.265337	0.414066	0.38293
ENSMUSG00000003346_Abhd17a	30.858	0.421924	0.447613	0.942609	0.345881	0.492978	0.307173
ENSMUSG00000003348_Mob3a	6.90407	0.275356	0.763109	0.360835	0.718223	0.805727	0.0938123
ENSMUSG00000003352_Cacnb3	20.7757	1.03882	0.530253	1.9591	0.0501007	0.141897	0.848027
ENSMUSG00000003354_Ccdc65	3.81235	-0.356631	0.812963	-0.43868	0.660893	0.76296	0.117498
ENSMUSG00000003355_Fkbp11	2.08367	-1.70011	0.843874	-2.01465	0.0439417	0.130631	0.883954
ENSMUSG00000003360_Ddx23	163.146	0.37949	0.252579	1.50246	0.132978	0.26257	0.580754
ENSMUSG00000003363_Pld3	37.7538	1.01174	0.421934	2.39786	0.0164912	0.0709406	1.1491
ENSMUSG00000003378_Grik5	40.9883	-0.0443841	0.383405	-0.115763	0.90784	0.94121	0.0263137
ENSMUSG00000003379_Cd79a	1.7304	-1.63237	0.820853	-1.98863	0.046742	1	0
ENSMUSG00000003380_Rabac1	36.9528	0.764936	0.454044	1.68472	0.0920433	0.207316	0.683367
ENSMUSG00000003382_Etv3	110.35	-0.221096	0.291895	-0.75745	0.44878	0.587281	0.231154
ENSMUSG00000003402_Prkcsh	92.683	0.432009	0.304932	1.41674	0.15656	0.292067	0.534517
ENSMUSG00000003410_Elavl3	287.145	0.437205	0.219694	1.99007	0.0465836	0.135459	0.868191
ENSMUSG00000003411_Rab3b	6.92705	0.0148633	0.723773	0.0205359	0.983616	0.990109	0.00431705
ENSMUSG00000003418_St8sia6	14.2246	-1.45287	0.699378	-2.07737	0.0377674	0.118454	0.926448
ENSMUSG00000003420_Fcgrt	13.2951	0.420506	0.602132	0.698361	0.484951	0.61893	0.208358
ENSMUSG00000003421_Nosip	50.9026	0.41168	0.38435	1.07111	0.284121	0.433717	0.362793
ENSMUSG00000003423_Pih1d1	2.96759	0.0260855	0.844406	0.0308921	0.975356	0.985085	0.00652641
ENSMUSG00000003429_Rps11	40.6522	0.893552	0.417401	2.14075	0.0322943	0.107758	0.96755
ENSMUSG00000003435_Supt5	211.96	0.086243	0.247293	0.348748	0.727278	0.812022	0.0904324
ENSMUSG00000003436_Dll3	6.86165	-2.42474	0.795144	-3.04943	0.00229276	0.0217876	1.66179
ENSMUSG00000003437_Paf1	144.073	0.216466	0.259145	0.835309	0.403544	0.546934	0.262065
ENSMUSG00000003438_Timm50	13.6665	0.409951	0.59844	0.685032	0.493324	0.626334	0.203194
ENSMUSG00000003444_Med29	24.3724	0.937252	0.490052	1.91256	0.0558047	0.151602	0.819296
ENSMUSG00000003452_Bicd1	326.023	0.430191	0.203135	2.11775	0.0341961	0.11131	0.953467
ENSMUSG00000003458_Ncstn	29.809	0.221213	0.499648	0.442737	0.657956	0.760589	0.11885
ENSMUSG00000003464_Pex19	64.3896	0.732877	0.342759	2.13817	0.0325029	0.108102	0.966166
ENSMUSG00000003469_Phyhip	258.44	0.992777	0.212707	4.66735	3.05e-06	0.000384269	3.41536
ENSMUSG00000003476_Crhr2	7.45715	-1.59602	0.743546	-2.14649	0.0318337	0.106964	0.970761
ENSMUSG00000003477_Inmt	3.78377	-1.95643	0.841802	-2.3241	0.0201202	0.0800259	1.09677
ENSMUSG00000003484_Cyp4f18	0.374298	-0.139322	0.605133	-0.230233	0.817911	1	0
ENSMUSG00000003500_Impdh1	36.0188	0.454198	0.426206	1.06568	0.28657	0.436053	0.360461
ENSMUSG00000003505_Psg18	12.9013	-1.76682	0.682696	-2.588	0.00965337	0.0517741	1.28589
ENSMUSG00000003518_Dusp3	73.6542	0.529639	0.313043	1.6919	0.0906644	0.205195	0.687833
ENSMUSG00000003526_Prodh	37.333	0.229858	0.406606	0.56531	0.571863	0.693189	0.159148
ENSMUSG00000003527_Dgcr14	24.4729	0.0764546	0.526536	0.145203	0.884551	0.926133	0.0333268
ENSMUSG00000003528_Slc25a1	15.8728	0.750348	0.607954	1.23422	0.217121	0.361825	0.441501
ENSMUSG00000003531_Dgcr6	34.6647	0.789581	0.469925	1.68023	0.0929131	0.208487	0.68092
ENSMUSG00000003534_Ddr1	40.355	0.15395	0.410189	0.375316	0.707425	0.79896	0.0974751
ENSMUSG00000003541_Ier3	7.52004	-0.397916	0.732426	-0.543285	0.586934	0.705315	0.151617
ENSMUSG00000003545_Fosb	26.352	-2.43755	0.592258	-4.11569	3.86e-05	0.00185943	2.73062
ENSMUSG00000003546_Klc4	18.2128	0.464633	0.56131	0.827765	0.407804	0.550313	0.25939
ENSMUSG00000003549_Ercc1	16.4737	-0.344634	0.576938	-0.597351	0.550273	0.674973	0.170714
ENSMUSG00000003555_Cyp17a1	3.43224	-1.31967	0.842692	-1.56602	0.117344	0.241104	0.617795
ENSMUSG00000003559_As3mt	7.68329	0.296706	0.741724	0.400023	0.68914	0.785004	0.105128
ENSMUSG00000003573_Homer3	458.994	0.656905	0.228131	2.8795	0.00398301	0.0308173	1.51121
ENSMUSG00000003575_Crtc1	86.4757	0.390987	0.32011	1.22141	0.221929	0.367331	0.434943
ENSMUSG00000003581_Rnf215	18.8406	0.120991	0.531241	0.227751	0.81984	0.880478	0.0552816
ENSMUSG00000003585_Sec14l2	22.6013	-0.0617122	0.525044	-0.117537	0.906434	0.940345	0.0267129
ENSMUSG00000003604_Aven	30.5329	-0.56512	0.463281	-1.21982	0.222532	0.368022	0.434127
ENSMUSG00000003617_Cp	23.5803	-0.315802	0.499698	-0.631985	0.527396	0.655408	0.183488
ENSMUSG00000003623_Crot	76.6137	0.107778	0.352279	0.305945	0.759646	0.835391	0.0781103
ENSMUSG00000003644_Rps6ka1	36.4255	0.606562	0.420054	1.44401	0.148736	0.28268	0.548704
ENSMUSG00000003657_Calb2	78.8708	0.80306	0.339104	2.36818	0.0178757	0.0745851	1.12735
ENSMUSG00000003660_Snrnp200	322.715	0.662025	0.196443	3.37006	0.000751506	0.0111307	1.95348
ENSMUSG00000003662_Ciao1	41.918	1.02986	0.421512	2.44326	0.0145553	0.0657115	1.18236
ENSMUSG00000003665_Has1	7.70789	0.0621522	0.708767	0.0876906	0.930123	0.956108	0.0194932
ENSMUSG00000003680_Taf6l	23.1243	-0.324915	0.499697	-0.650224	0.515548	0.645942	0.189806
ENSMUSG00000003721_Insig2	55.4829	0.48823	0.35129	1.38982	0.164583	0.301674	0.520463
ENSMUSG00000003731_Kpna6	145.131	0.383023	0.240199	1.59461	0.1108	0.23226	0.634025
ENSMUSG00000003746_Man1a	60.0218	0.585694	0.353403	1.6573	0.0974587	0.214554	0.668464
ENSMUSG00000003752_Itpkc	20.6282	-0.825813	0.541887	-1.52396	0.127519	0.255206	0.593109
ENSMUSG00000003762_Adck4	31.0318	-0.763657	0.473247	-1.61366	0.106602	0.22687	0.644222
ENSMUSG00000003778_Brd8	269.888	0.3167	0.21904	1.44586	0.148217	0.282035	0.549697
ENSMUSG00000003779_Kif20a	0.946347	0.292919	0.744687	0.393346	0.694064	1	0
ENSMUSG00000003808_Farsa	39.5532	-0.337115	0.445326	-0.757007	0.449046	0.58748	0.231007
ENSMUSG00000003809_Gcdh	22.0055	0.714662	0.510332	1.40039	0.161398	0.298121	0.525608
ENSMUSG00000003810_Mast2	78.7103	0.48353	0.308607	1.56681	0.117158	0.240927	0.618115
ENSMUSG00000003812_Dnase2a	21.7378	-0.162296	0.503214	-0.322518	0.74706	0.825912	0.0830663
ENSMUSG00000003813_Rad23a	58.4022	0.61053	0.375495	1.62594	0.103963	0.223259	0.651191
ENSMUSG00000003814_Calr	914.025	0.242424	0.185896	1.30409	0.192205	0.333997	0.476257
ENSMUSG00000003824_Syce2	6.42181	-0.862111	0.768464	-1.12186	0.26192	0.410805	0.386365
ENSMUSG00000003847_Nfat5	476.827	0.475003	0.185338	2.5629	0.0103801	0.0541479	1.26642
ENSMUSG00000003848_Nob1	27.6887	0.226444	0.465251	0.486713	0.626462	0.736348	0.132917
ENSMUSG00000003849_Nqo1	8.02763	0.533718	0.754998	0.706913	0.47962	0.614679	0.211352
ENSMUSG00000003863_Ppfia3	86.3865	0.519725	0.311874	1.66646	0.0956221	0.212394	0.672858
ENSMUSG00000003865_Gys1	25.9847	0.805433	0.495658	1.62498	0.104167	0.223547	0.650631
ENSMUSG00000003868_Ruvbl2	16.7895	0.85213	0.5904	1.44331	0.148933	0.282979	0.548246
ENSMUSG00000003872_Lin7b	0.946853	-0.108902	0.791362	-0.137614	0.890546	1	0
ENSMUSG00000003873_Bax	10.9687	0.383395	0.643311	0.595972	0.551194	0.675685	0.170256
ENSMUSG00000003882_Il7r	5.06297	-2.0494	0.827612	-2.47628	0.013276	0.0625791	1.20357
ENSMUSG00000003923_Tfam	72.8915	-0.00872554	0.308947	-0.0282428	0.977469	0.986524	0.0058923
ENSMUSG00000003929_Zfp81	83.3854	0.812104	0.322059	2.52161	0.0116821	0.0578369	1.2378
ENSMUSG00000003934_Efnb3	19.5672	-1.55218	0.560784	-2.76787	0.00564238	0.0378392	1.42206
ENSMUSG00000003948_Mmd	54.2766	0.173911	0.349666	0.497363	0.618933	0.730564	0.136341
ENSMUSG00000003949_Hlf	161.4	0.66179	0.248021	2.66829	0.00762393	0.0451266	1.34557
ENSMUSG00000003955_Fam162a	41.7485	0.211433	0.404856	0.522243	0.601501	0.716681	0.144674
ENSMUSG00000003970_Rpl8	166.44	0.656854	0.227155	2.89166	0.00383211	0.0301626	1.52053
ENSMUSG00000003974_Grm3	67.2886	0.343486	0.359701	0.954921	0.339618	0.486813	0.312638
ENSMUSG00000003992_Ssbp2	99.3264	0.210961	0.282306	0.74728	0.454895	0.592992	0.226951
ENSMUSG00000004018_Fancl	5.5465	-0.0794867	0.771946	-0.102969	0.917987	0.947947	0.023216
ENSMUSG00000004031_Brinp2	94.3201	0.0865693	0.28175	0.307256	0.758649	0.834703	0.0784682
ENSMUSG00000004032_Gstm5	45.3335	1.02594	0.449747	2.28115	0.0225393	0.0861116	1.06494
ENSMUSG00000004035_Gstm7	7.41748	-0.353237	0.716102	-0.493278	0.621816	0.732769	0.135033
ENSMUSG00000004038_Gstm3	1.33947	-0.998976	0.811907	-1.23041	0.218545	1	0
ENSMUSG00000004040_Stat3	50.7762	-0.591902	0.364967	-1.6218	0.104847	0.224372	0.649031
ENSMUSG00000004043_Stat5a	24.8233	-1.73051	0.519001	-3.33431	0.000855108	0.0120448	1.9192
ENSMUSG00000004044_Ptrf	25.7237	0.0573223	0.507036	0.113054	0.909988	0.942741	0.0256078
ENSMUSG00000004054_Map3k11	12.9314	0.0958767	0.601192	0.159478	0.873293	0.917947	0.0371822
ENSMUSG00000004056_Akt2	148.371	0.709612	0.246022	2.88435	0.00392228	0.0305765	1.51461
ENSMUSG00000004069_Dnaja3	90.0169	0.511494	0.312248	1.6381	0.1014	0.21969	0.65819
ENSMUSG00000004070_Hmox2	89.6378	0.75813	0.308774	2.45529	0.0140771	0.0644314	1.1909
ENSMUSG00000004071_Cdip1	131.679	0.406955	0.267776	1.51976	0.128572	0.256677	0.590614
ENSMUSG00000004085_Zak	45.5696	-0.778403	0.457892	-1.69997	0.089136	0.202874	0.692774
ENSMUSG00000004096_Cwc15	141.469	0.454027	0.247069	1.83765	0.0661133	0.168941	0.772265
ENSMUSG00000004098_Col5a3	28.0047	0.00477488	0.47636	0.0100237	0.992002	0.995008	0.00217328
ENSMUSG00000004099_Dnmt1	114.473	0.490592	0.259899	1.88763	0.0590759	0.157317	0.803225
ENSMUSG00000004100_Ppan	14.2144	-0.509701	0.614457	-0.829516	0.406813	0.549346	0.260154
ENSMUSG00000004105_Angptl2	33.1237	-0.63715	0.443554	-1.43647	0.15087	0.285327	0.544657
ENSMUSG00000004110_Cacna1e	379.642	0.151645	0.1814	0.835969	0.403172	0.546545	0.262374
ENSMUSG00000004113_Cacna1b	66.5828	0.544114	0.337716	1.61116	0.107145	0.227799	0.642449
ENSMUSG00000004127_Trmt10a	35.8568	-0.642479	0.439357	-1.46231	0.143655	0.276011	0.559074
ENSMUSG00000004151_Etv1	214.307	0.828691	0.241989	3.4245	0.000615938	0.00990835	2.004
ENSMUSG00000004187_Kifc2	79.8854	0.585596	0.305784	1.91507	0.0554841	0.150985	0.821067
ENSMUSG00000004207_Psap	682.117	0.846222	0.193646	4.36994	1.24e-05	0.000922067	3.03524
ENSMUSG00000004221_Ikbkg	64.7143	0.0446409	0.328067	0.136072	0.891764	0.930544	0.031263
ENSMUSG00000004231_Pax2	27.1366	-1.67834	0.49555	-3.38681	0.000707093	0.0107115	1.97015
ENSMUSG00000004233_Wars2	44.6396	0.0186797	0.405669	0.0460467	0.963273	0.978085	0.00962338
ENSMUSG00000004263_Atn1	208.821	0.699235	0.26346	2.65404	0.00795336	0.046182	1.33553
ENSMUSG00000004264_Phb2	34.159	0.472659	0.421663	1.12094	0.262313	0.411162	0.385987
ENSMUSG00000004266_Ptpn6	1.53061	-0.413922	0.825489	-0.501426	0.616071	1	0
ENSMUSG00000004267_Eno2	363.448	0.801472	0.212863	3.76521	0.000166412	0.00450376	2.34643
ENSMUSG00000004268_Emg1	52.5606	-0.320347	0.350745	-0.913331	0.361068	0.507177	0.29484
ENSMUSG00000004270_Lpcat3	25.8079	0.209668	0.472878	0.443387	0.657486	0.760276	0.119029
ENSMUSG00000004285_Atp6v1f	161.466	0.102672	0.277757	0.369648	0.711645	0.801422	0.0961386
ENSMUSG00000004296_Il12b	3.35329	-2.18513	0.846211	-2.58225	0.00981577	0.0522567	1.28186
ENSMUSG00000004317_Clcn5	36.047	0.418092	0.419817	0.99589	0.319304	0.467458	0.330257
ENSMUSG00000004319_Clcn3	484.808	0.453113	0.194909	2.32474	0.0200857	0.0799434	1.09722
ENSMUSG00000004328_Hif3a	43.2533	-0.392304	0.41537	-0.944469	0.34493	0.491949	0.30808
ENSMUSG00000004344_Gpx5	2.5278	-1.4415	0.848799	-1.69828	0.0894543	0.203383	0.691685
ENSMUSG00000004347_Pde1c	401.294	0.496111	0.185459	2.67505	0.00747185	0.0444814	1.35182
ENSMUSG00000004356_Utp20	69.2898	0.491488	0.315321	1.55869	0.119069	0.243562	0.61339
ENSMUSG00000004359_Spic	7.1244	-2.12807	0.754578	-2.82021	0.00479919	0.0342769	1.465
ENSMUSG00000004360_9330159F19Rik	200.213	0.511104	0.213401	2.39504	0.0166184	0.071357	1.14656
ENSMUSG00000004364_Cul3	374.319	0.748231	0.200482	3.73215	0.00018985	0.0048323	2.31585
ENSMUSG00000004366_Sst	3.12767	-1.22163	0.84018	-1.45401	0.145942	0.279001	0.554394
ENSMUSG00000004371_Il11	3.34592	-2.56311	0.84916	-3.0184	0.00254111	0.0231366	1.6357
ENSMUSG00000004383_Large	255.148	0.63145	0.228487	2.76362	0.00571648	0.0381084	1.41898
ENSMUSG00000004393_Ddx56	15.9004	-0.349893	0.577395	-0.605985	0.544525	0.670182	0.173807
ENSMUSG00000004394_Tmed4	73.9043	0.821805	0.332698	2.47012	0.0135068	0.0631881	1.19936
ENSMUSG00000004415_Col26a1	23.2928	-1.8765	0.846582	-2.21656	0.0266534	0.0957778	1.01874
ENSMUSG00000004446_Bid	6.98372	-2.06343	0.793266	-2.60119	0.00929016	0.0507431	1.29462
ENSMUSG00000004451_Ralb	35.2699	0.00707096	0.433665	0.0163051	0.986991	0.992183	0.00340833
ENSMUSG00000004455_Ppp1cc	279.505	0.520484	0.220534	2.36011	0.0182695	0.0757249	1.12076
ENSMUSG00000004460_Dnajb11	82.8617	0.365865	0.327343	1.11768	0.263702	0.412563	0.384509
ENSMUSG00000004462_Tbccd1	21.183	0.605124	0.528588	1.1448	0.252294	0.401086	0.396762
ENSMUSG00000004473_Clec11a	18.5159	-0.728264	0.551018	-1.32167	0.186278	0.327489	0.484803
ENSMUSG00000004500_Zfp324	19.038	-0.00669696	0.526055	-0.0127305	0.989843	0.993696	0.00274657
ENSMUSG00000004508_Gab2	63.8153	-0.601182	0.345765	-1.7387	0.0820872	0.192866	0.714743
ENSMUSG00000004530_Coro1c	114.098	0.323165	0.281011	1.15001	0.25014	0.398763	0.399286
ENSMUSG00000004535_Tax1bp1	548.706	0.547457	0.195583	2.7991	0.00512445	0.0357024	1.4473
ENSMUSG00000004540_Psg17	5.28458	-2.05583	0.829666	-2.4779	0.0132158	0.0624169	1.2047
ENSMUSG00000004542_Psg19	11.1309	-2.19607	0.728503	-3.01449	0.00257411	0.0233442	1.63182
ENSMUSG00000004552_Ctse	2.09999	-0.991136	0.842991	-1.17574	0.2397	0.387236	0.412024
ENSMUSG00000004558_Ndrg2	367.617	0.945999	0.203557	4.64734	3.36e-06	0.000400057	3.39788
ENSMUSG00000004561_Mettl17	18.5857	-0.0871416	0.542731	-0.160561	0.872439	0.917349	0.0374655
ENSMUSG00000004562_Arhgef40	71.4598	-0.572129	0.336216	-1.70167	0.0888168	0.202373	0.693848
ENSMUSG00000004565_Pnpla6	60.2621	0.211621	0.351552	0.601963	0.547199	0.67232	0.172424
ENSMUSG00000004567_Mcoln1	98.1296	-0.269489	0.290068	-0.929054	0.352861	0.499699	0.301291
ENSMUSG00000004568_Arhgef18	97.2212	0.347675	0.289176	1.20229	0.22925	0.375452	0.425446
ENSMUSG00000004591_Pkn2	136.421	0.532036	0.284297	1.87141	0.0612885	0.160765	0.793809
ENSMUSG00000004609_Cd33	32.2983	-1.9847	0.543015	-3.65497	0.000257215	0.00581019	2.23581
ENSMUSG00000004610_Etfb	54.2477	0.462	0.360521	1.28148	0.200025	0.342902	0.46483
ENSMUSG00000004612_Nkg7	0.65443	-0.667739	0.661464	-1.00949	0.312741	1	0
ENSMUSG00000004613_Lim2	0.454493	-0.430788	0.604654	-0.712454	0.476184	1	0
ENSMUSG00000004626_Stxbp2	25.0512	-0.204144	0.516347	-0.395362	0.692576	0.787459	0.103772
ENSMUSG00000004630_Pcp2	640.184	0.814576	0.25304	3.21915	0.0012857	0.0153399	1.81418
ENSMUSG00000004631_Sgce	61.6379	0.163292	0.360277	0.45324	0.650376	0.755029	0.122036
ENSMUSG00000004633_Chn2	422.409	0.885143	0.184738	4.79135	1.66e-06	0.000254603	3.59414
ENSMUSG00000004637_Wwox	94.0476	-0.359752	0.309797	-1.16125	0.24554	0.393792	0.404733
ENSMUSG00000004642_Slbp	66.77	0.274185	0.323226	0.848276	0.396284	0.53967	0.267872
ENSMUSG00000004651_Tyr	11.3649	-1.22039	0.746538	-1.63474	0.102104	0.220676	0.656246
ENSMUSG00000004654_Ghrhr	5.10771	-3.1861	0.839318	-3.79605	0.000147018	0.00420563	2.37617
ENSMUSG00000004655_Aqp1	3.04256	-2.04568	0.848279	-2.41156	0.0158843	0.0693469	1.15897
ENSMUSG00000004661_Arid3b	22.6358	-1.59195	0.521159	-3.05464	0.0022533	0.0215953	1.66564
ENSMUSG00000004665_Cnn2	6.69593	-0.804951	0.78224	-1.02903	0.303464	0.452506	0.344375
ENSMUSG00000004667_Polr2e	26.7252	0.668923	0.491695	1.36044	0.173689	0.312652	0.504939
ENSMUSG00000004668_Abca13	24.9428	-1.76251	0.56236	-3.13414	0.00172358	0.0183813	1.73562
ENSMUSG00000004677_Myo9b	60.7769	-0.0790427	0.370425	-0.213384	0.831028	0.88902	0.0510887
ENSMUSG00000004698_Hdac9	42.6359	0.598332	0.431473	1.38672	0.165527	0.302929	0.518659
ENSMUSG00000004707_Ly9	3.26101	-1.39061	0.839334	-1.65681	0.0975586	0.214646	0.668278
ENSMUSG00000004709_Cd244	8.51948	-1.07515	0.767475	-1.4009	0.161245	0.298019	0.525756
ENSMUSG00000004730_Adgre1	6.73977	-0.84826	0.74868	-1.13301	0.257211	0.406198	0.391262
ENSMUSG00000004748_Mtfp1	27.997	0.0968399	0.456026	0.212356	0.831829	0.889611	0.0507996
ENSMUSG00000004768_Rab23	86.2308	-0.11317	0.292164	-0.387351	0.698496	0.791894	0.101333
ENSMUSG00000004771_Rab11a	118.141	0.809409	0.311768	2.59619	0.00942636	0.0511193	1.29141
ENSMUSG00000004788_Eif2b2	24.45	0.607169	0.542266	1.11969	0.262847	0.411663	0.385458
ENSMUSG00000004789_Dlst	165.576	0.540779	0.251086	2.15376	0.0312592	0.10575	0.975721
ENSMUSG00000004791_Pgf	2.83854	-1.58537	0.846937	-1.87189	0.0612222	0.160704	0.793974
ENSMUSG00000004798_Ulk2	101.941	0.916517	0.319482	2.86876	0.0041209	0.031395	1.50314
ENSMUSG00000004814_Ccl24	1.87745	-1.36345	0.838006	-1.62702	0.103733	1	0
ENSMUSG00000004815_Dgkq	37.3327	0.19352	0.431735	0.448239	0.653981	0.757589	0.120567
ENSMUSG00000004837_Grap	2.89738	-1.19996	0.847145	-1.41648	0.156635	0.292082	0.534496
ENSMUSG00000004842_Pou1f1	14.2814	-1.43731	0.710237	-2.02371	0.0430004	0.128841	0.889944
ENSMUSG00000004843_Chmp2b	63.069	0.636545	0.34621	1.83861	0.0659727	0.168681	0.772934
ENSMUSG00000004846_Plod3	27.5255	-0.324236	0.499036	-0.649724	0.51587	0.646189	0.18964
ENSMUSG00000004849_Ap1s1	47.892	0.143076	0.388645	0.368141	0.712768	0.802256	0.095687
ENSMUSG00000004864_Mapk13	0.688809	0.201946	0.66829	0.302183	0.762513	1	0
ENSMUSG00000004865_Srpk1	119.352	0.101886	0.263549	0.386594	0.699056	0.79235	0.101083
ENSMUSG00000004872_Pax3	50.3587	-0.0675834	0.359281	-0.188108	0.850792	0.902483	0.0445612
ENSMUSG00000004880_Lbr	24.9878	0.139672	0.474776	0.294185	0.768616	0.842707	0.0743234
ENSMUSG00000004885_Crabp2	6.65889	-1.79097	0.794333	-2.25468	0.0241534	0.090001	1.04575
ENSMUSG00000004891_Nes	50.6901	-1.1231	0.387632	-2.89735	0.00376333	0.0297962	1.52584
ENSMUSG00000004892_Bcan	168.408	0.620469	0.236923	2.61887	0.0088222	0.0491562	1.30842
ENSMUSG00000004894_Hapln2	7.27099	-0.389713	0.756141	-0.515397	0.606275	0.72036	0.14245
ENSMUSG00000004895_Prcc	36.4031	0.459997	0.432196	1.06433	0.287181	0.436648	0.359869
ENSMUSG00000004896_Rrnad1	54.1162	-0.340281	0.350016	-0.972187	0.330958	0.47847	0.320145
ENSMUSG00000004897_Hdgf	142.925	0.268798	0.260837	1.03052	0.302767	0.451623	0.345224
ENSMUSG00000004902_Slc25a18	87.5914	0.824867	0.323855	2.54702	0.0108647	0.0555551	1.25528
ENSMUSG00000004929_Thop1	35.4147	-0.251578	0.420718	-0.597973	0.549858	0.674624	0.170938
ENSMUSG00000004931_Apba3	11.8412	-0.0986762	0.665167	-0.148348	0.882068	0.924725	0.0339876
ENSMUSG00000004933_Matk	28.6839	-0.0105236	0.493636	-0.0213186	0.982992	0.989738	0.00447965
ENSMUSG00000004934_Pias4	36.6157	-0.218141	0.43335	-0.503383	0.614695	0.727151	0.138375
ENSMUSG00000004936_Map2k1	111.478	0.970364	0.277477	3.4971	0.000470352	0.00837519	2.07701
ENSMUSG00000004937_Sgta	58.0925	0.750875	0.366343	2.04965	0.0403986	0.123716	0.907573
ENSMUSG00000004939_Nmrk2	1.97882	-0.773188	0.836996	-0.923766	0.355608	1	0
ENSMUSG00000004945_Tmem242	25.4497	-0.031328	0.483019	-0.0648588	0.948286	0.967926	0.0141578
ENSMUSG00000004947_Dtx2	17.9888	-0.590912	0.532618	-1.10945	0.267238	0.415937	0.380972
ENSMUSG00000004948_Zp3	1.51837	-1.32065	0.823727	-1.60326	0.108877	1	0
ENSMUSG00000004951_Hspb1	6.55605	0.848981	0.776204	1.09376	0.27406	0.422748	0.373918
ENSMUSG00000004952_Rasa4	35.7542	-0.208478	0.424796	-0.490773	0.623587	0.734139	0.134222
ENSMUSG00000004961_Syt5	3.42943	0.0602561	0.82921	0.0726669	0.942071	0.964217	0.0158252
ENSMUSG00000004980_Hnrnpa2b1	1012.81	0.51245	0.16377	3.12909	0.00175348	0.0185527	1.73159
ENSMUSG00000004988_Fxyd4	5.06646	-0.415933	0.813023	-0.511588	0.608939	0.722395	0.141225
ENSMUSG00000004994_Ccdc130	20.9485	0.313473	0.521315	0.601312	0.547632	0.672628	0.172225
ENSMUSG00000004996_Mri1	11.4117	-0.823259	0.620191	-1.32743	0.184367	0.325015	0.488097
ENSMUSG00000005034_Prkacb	221.399	0.744818	0.217529	3.424	0.000617058	0.00992019	2.00348
ENSMUSG00000005043_Sgsh	18.223	-0.253161	0.539222	-0.469493	0.638717	0.746066	0.127223
ENSMUSG00000005045_Chd5	111.01	-0.0104001	0.3312	-0.0314014	0.974949	0.984879	0.00661728
ENSMUSG00000005054_Cstb	24.3703	1.07333	0.51113	2.09992	0.0357356	0.11463	0.940702
ENSMUSG00000005057_Sh2b2	19.2495	-1.40198	0.528986	-2.65032	0.00804157	0.0464201	1.33329
ENSMUSG00000005069_Pex5	34.3972	0.602906	0.436596	1.38092	0.167303	0.30517	0.515458
ENSMUSG00000005078_Jkamp	30.8001	0.739635	0.483952	1.52832	0.126432	0.253719	0.595647
ENSMUSG00000005087_Cd44	23.6648	-1.53286	0.49092	-3.12243	0.00179364	0.0187463	1.72708
ENSMUSG00000005089_Slc1a2	2591.37	0.934295	0.179163	5.21478	1.84e-07	7.66e-05	4.11577
ENSMUSG00000005102_Eif2ak4	34.3275	0.0671118	0.432662	0.155114	0.876732	0.920326	0.0360584
ENSMUSG00000005103_Wdr1	225.151	0.337581	0.222775	1.51534	0.129686	0.258223	0.588006
ENSMUSG00000005107_Slc2a9	10.6946	-0.95568	0.723285	-1.32131	0.1864	0.327592	0.484667
ENSMUSG00000005124_Wisp1	12.7996	-1.00293	0.618446	-1.6217	0.104868	0.224398	0.64898
ENSMUSG00000005125_Ndrg1	35.544	-0.836363	0.419596	-1.99326	0.0462331	0.134835	0.870198
ENSMUSG00000005131_4930550C14Rik	1.50238	-0.467346	0.822486	-0.568212	0.569891	1	0
ENSMUSG00000005142_Man2b1	27.5177	0.17031	0.464463	0.366683	0.713856	0.803025	0.0952707
ENSMUSG00000005148_Klf5	14.2669	-1.98377	0.744549	-2.6644	0.00771267	0.0454317	1.34264
ENSMUSG00000005150_Wdr83	17.7177	0.0309346	0.585972	0.0527919	0.957898	0.974467	0.0112331
ENSMUSG00000005161_Prdx2	151.316	0.479191	0.269474	1.77824	0.0753641	0.183019	0.737505
ENSMUSG00000005198_Polr2a	230.778	0.541989	0.223	2.43045	0.0150802	0.0672229	1.17248
ENSMUSG00000005204_Senp3	64.0849	-0.186133	0.357211	-0.521075	0.602315	0.717073	0.144437
ENSMUSG00000005220_Corin	59.1931	0.861125	0.3703	2.32548	0.0200463	0.0799134	1.09738
ENSMUSG00000005225_Plekha8	49.4501	0.593373	0.383222	1.54838	0.12153	0.246915	0.607453
ENSMUSG00000005232_G6pc2	0.948532	-0.325035	0.746805	-0.435234	0.663392	1	0
ENSMUSG00000005233_Spc25	3.43603	-1.81648	0.83598	-2.17287	0.0297898	0.102402	0.989691
ENSMUSG00000005237_Dnah2	15.3319	-2.60761	0.64545	-4.03998	5.35e-05	0.00229647	2.63894
ENSMUSG00000005251_Ripk4	3.87704	-1.75876	0.83782	-2.09921	0.0357986	0.114769	0.940176
ENSMUSG00000005262_Ufd1l	77.9969	0.500733	0.312908	1.60025	0.109542	0.230841	0.636686
ENSMUSG00000005267_Zfp287	50.4768	-0.0955195	0.362111	-0.263785	0.791945	0.860123	0.0654395
ENSMUSG00000005268_Prlr	28.0063	-1.73086	0.578567	-2.99164	0.00277486	0.0244631	1.61149
ENSMUSG00000005299_Letm1	206.123	0.23758	0.212459	1.11823	0.263467	0.41232	0.384766
ENSMUSG00000005312_Ubqln1	330.222	0.844278	0.256455	3.29212	0.000994368	0.0132406	1.87809
ENSMUSG00000005320_Fgfr4	2.95672	-1.52015	0.849227	-1.79003	0.0734485	0.180126	0.744424
ENSMUSG00000005338_Cadm3	353.313	0.954484	0.214771	4.44419	8.82e-06	0.000754242	3.12249
ENSMUSG00000005354_Txn2	72.1056	0.600759	0.342178	1.75569	0.0791412	0.188605	0.724447
ENSMUSG00000005355_Casp14	13.938	-2.39922	0.673294	-3.5634	0.000366081	0.00720602	2.1423
ENSMUSG00000005357_Slc1a6	393.637	0.586301	0.249466	2.35022	0.0187621	0.0770267	1.11336
ENSMUSG00000005360_Slc1a3	5393.08	0.723634	0.145521	4.97271	6.6e-07	0.00015391	3.81273
ENSMUSG00000005362_Crbn	97.1981	0.52411	0.294643	1.7788	0.075273	0.182949	0.737669
ENSMUSG00000005364_Il5ra	6.56207	-1.23797	0.807085	-1.53387	0.125061	0.252006	0.59859
ENSMUSG00000005370_Msh6	73.1822	-0.0241434	0.319532	-0.0755586	0.93977	0.962549	0.0165773
ENSMUSG00000005371_Fbxo11	323.176	0.662179	0.178589	3.70783	0.000209046	0.00507529	2.29454
ENSMUSG00000005373_Mlxipl	13.0593	-1.5899	0.686425	-2.31621	0.020547	0.0811665	1.09062
ENSMUSG00000005374_Tbl2	53.0573	-0.462218	0.351087	-1.31653	0.187995	0.329432	0.482234
ENSMUSG00000005378_Wbscr22	17.1705	0.0840945	0.611542	0.137512	0.890626	0.929688	0.0316625
ENSMUSG00000005397_Nid1	53.7815	0.186833	0.354293	0.527341	0.597957	0.713778	0.146437
ENSMUSG00000005410_Mcm5	5.76612	0.772366	0.771263	1.00143	0.316619	0.464953	0.332591
ENSMUSG00000005413_Hmox1	5.75306	-0.0489874	0.764665	-0.0640638	0.948919	0.968424	0.0139346
ENSMUSG00000005417_Mprip	2133.51	0.566323	0.160249	3.53402	0.000409289	0.00769791	2.11363
ENSMUSG00000005442_Cic	154.627	0.68925	0.265103	2.59993	0.00932417	0.050843	1.29377
ENSMUSG00000005447_Pafah1b3	6.16315	-0.572098	0.813672	-0.703106	0.48199	0.61669	0.209933
ENSMUSG00000005465_Il27ra	1.59558	-1.19026	0.828413	-1.43679	0.150777	1	0
ENSMUSG00000005469_Prkaca	146.219	0.672875	0.293557	2.29214	0.0218976	0.0845735	1.07277
ENSMUSG00000005470_Asf1b	5.95879	-1.50344	0.795297	-1.89042	0.0587023	0.156639	0.805101
ENSMUSG00000005474_Myl10	0.937858	-1.03089	0.746265	-1.3814	0.167155	1	0
ENSMUSG00000005481_Ddx39	19.8971	-0.960503	0.52539	-1.82817	0.0675236	0.171038	0.766907
ENSMUSG00000005483_Dnajb1	41.1526	0.434965	0.391017	1.11239	0.265969	0.414802	0.382159
ENSMUSG00000005493_Msh4	9.28617	-1.24695	0.783623	-1.59126	0.111551	0.233229	0.632218
ENSMUSG00000005501_Usp40	79.4828	0.34233	0.310791	1.10148	0.270687	0.419424	0.377347
ENSMUSG00000005503_Evx1	5.51614	-1.58743	0.778357	-2.03946	0.0414044	0.125762	0.900449
ENSMUSG00000005505_Kbtbd4	43.9696	0.476953	0.391391	1.21861	0.222993	0.368665	0.433368
ENSMUSG00000005506_Celf1	231.932	0.814	0.213793	3.80743	0.000140419	0.00412424	2.38466
ENSMUSG00000005510_Ndufs3	137.035	0.752667	0.257222	2.92614	0.00343198	0.0279704	1.5533
ENSMUSG00000005514_Por	85.1845	0.541013	0.298064	1.81509	0.06951	0.174013	0.759417
ENSMUSG00000005533_Igf1r	251.267	0.325685	0.228165	1.42741	0.153461	0.288581	0.539732
ENSMUSG00000005534_Insr	175.232	0.173005	0.250229	0.691387	0.489323	0.622571	0.205811
ENSMUSG00000005540_Fcer2a	11.5947	-0.440141	0.683904	-0.643572	0.519853	0.649351	0.18752
ENSMUSG00000005547_Cyp2a5	2.10328	-0.796897	0.847631	-0.940146	0.347142	0.494176	0.306118
ENSMUSG00000005553_Atp4a	4.12261	-2.37771	0.843716	-2.81814	0.00483028	0.0344001	1.46344
ENSMUSG00000005566_Trim28	78.2163	0.595338	0.304241	1.9568	0.0503716	0.142369	0.846584
ENSMUSG00000005575_Ube2m	73.9189	0.667677	0.342235	1.95093	0.0510656	0.14367	0.842633
ENSMUSG00000005580_Adcy9	125.133	0.236551	0.280989	0.84185	0.399872	0.543241	0.265008
ENSMUSG00000005583_Mef2c	238.168	0.397034	0.215855	1.83936	0.065862	0.168499	0.773403
ENSMUSG00000005609_Ctr9	129.813	0.558621	0.262232	2.13025	0.0331507	0.10909	0.962216
ENSMUSG00000005610_Eif4g2	717.977	1.1029	0.195285	5.64767	1.63e-08	2.1e-05	4.67778
ENSMUSG00000005611_Mrvi1	10.2191	-1.54	0.753822	-2.04293	0.0410597	0.125	0.903092
ENSMUSG00000005615_Pcyt1a	83.4417	-0.112312	0.299798	-0.374625	0.70794	0.799144	0.097375
ENSMUSG00000005621_Zfp592	74.0507	0.11703	0.305518	0.383053	0.70168	0.794417	0.0999514
ENSMUSG00000005625_Psmd4	207.485	0.666102	0.219967	3.02819	0.00246024	0.0227256	1.64348
ENSMUSG00000005628_Tmod4	0.380577	-0.188905	0.604589	-0.312452	0.754697	1	0
ENSMUSG00000005640_Insrr	12.9609	-2.20095	0.719231	-3.06015	0.00221228	0.0213608	1.67038
ENSMUSG00000005649_Cabp5	4.85801	-2.77545	0.827762	-3.35296	0.000799527	0.0115713	1.93662
ENSMUSG00000005656_Snx6	77.0122	0.781438	0.316756	2.46701	0.0136248	0.0635349	1.19699
ENSMUSG00000005667_Mthfd2	11.4304	0.45506	0.641011	0.70991	0.47776	0.613208	0.212392
ENSMUSG00000005672_Kit	199.757	0.72429	0.236926	3.05703	0.0022354	0.0214657	1.66826
ENSMUSG00000005674_Tomm40l	42.4842	0.171398	0.420263	0.407834	0.683395	0.779892	0.107966
ENSMUSG00000005677_Nr1i3	9.84865	-3.05036	0.776836	-3.92665	8.61e-05	0.00309321	2.50959
ENSMUSG00000005681_Apoa2	0.286729	0.175506	0.606605	0.289324	0.772333	1	0
ENSMUSG00000005682_Pan2	28.4555	0.0905713	0.471496	0.192094	0.847669	0.900574	0.0454806
ENSMUSG00000005683_Cs	183.389	0.806952	0.238693	3.38071	0.000722983	0.0108338	1.96522
ENSMUSG00000005686_Ampd3	38.6327	-0.192173	0.400496	-0.479839	0.631342	0.740063	0.130732
ENSMUSG00000005687_Bcas2	86.5584	0.645412	0.308648	2.09109	0.0365198	0.116035	0.935409
ENSMUSG00000005696_Sh2d1a	4.03586	0.576761	0.841165	0.685668	0.492922	0.625927	0.203476
ENSMUSG00000005698_Ctcf	117.327	0.450332	0.265913	1.69353	0.0903542	0.20465	0.688989
ENSMUSG00000005699_Pard6a	11.188	0.696775	0.673423	1.03468	0.30082	0.449944	0.346842
ENSMUSG00000005716_Pvalb	1047.38	0.804726	0.179582	4.4811	7.43e-06	0.000702318	3.15347
ENSMUSG00000005718_Tfap4	7.16752	-0.407397	0.734975	-0.554301	0.579373	0.69973	0.15507
ENSMUSG00000005732_Ranbp1	117.981	0.408899	0.278291	1.46932	0.141746	0.27379	0.562583
ENSMUSG00000005763_Cd247	18.9123	-0.774694	0.576973	-1.34269	0.179374	0.319071	0.496113
ENSMUSG00000005774_Rfx5	40.6501	0.230122	0.391304	0.58809	0.556472	0.679992	0.167496
ENSMUSG00000005779_Psmb4	38.8231	0.387946	0.418958	0.92598	0.354456	0.501282	0.299918
ENSMUSG00000005800_Mmp8	10.9665	-1.89128	0.761191	-2.48463	0.0129685	0.0616938	1.20976
ENSMUSG00000005802_Slc30a4	71.6287	0.53312	0.348565	1.52947	0.126148	0.253385	0.596219
ENSMUSG00000005803_Sqrdl	16.138	0.481473	0.562871	0.855387	0.392337	0.536108	0.270748
ENSMUSG00000005804_Bloc1s6	28.6023	0.10205	0.448176	0.227701	0.819879	0.880478	0.0552816
ENSMUSG00000005813_Metap1	66.9103	0.350518	0.338613	1.03516	0.300595	0.449742	0.347037
ENSMUSG00000005823_Gpr108	12.6272	0.324915	0.672134	0.483407	0.628807	0.737861	0.132025
ENSMUSG00000005824_Tnfsf14	6.01637	-1.43162	0.788413	-1.81582	0.0693975	0.173925	0.759638
ENSMUSG00000005836_Gata6	3.40658	-1.40076	0.839698	-1.66817	0.095283	0.211987	0.673691
ENSMUSG00000005846_Rsl1d1	81.5487	0.334899	0.318794	1.05052	0.293479	0.442757	0.353835
ENSMUSG00000005864_Cnga2	4.15384	-1.16151	0.829608	-1.40007	0.161492	0.298253	0.525416
ENSMUSG00000005871_Apc	796.759	0.59546	0.165327	3.60171	0.000316126	0.00662504	2.17881
ENSMUSG00000005873_Reep5	124.848	1.15019	0.291722	3.94274	8.06e-05	0.00298398	2.5252
ENSMUSG00000005881_Ergic3	41.8207	1.23455	0.414233	2.98032	0.00287949	0.0250406	1.60135
ENSMUSG00000005882_Uqcc1	91.0198	-0.392609	0.307398	-1.2772	0.201531	0.344387	0.462954
ENSMUSG00000005883_Spo11	4.74217	-1.12545	0.83284	-1.35134	0.176587	0.315828	0.500549
ENSMUSG00000005886_Ncoa2	278.016	0.609365	0.1917	3.17875	0.00147911	0.0168001	1.77469
ENSMUSG00000005892_Trh	2.18819	-1.54332	0.844678	-1.82711	0.0676828	0.171139	0.766651
ENSMUSG00000005893_Nr2c2	139.173	0.530057	0.259134	2.04549	0.0408063	0.124434	0.905063
ENSMUSG00000005897_Nr2c1	27.768	-0.0787206	0.458187	-0.171809	0.863588	0.910899	0.04053
ENSMUSG00000005899_Smpd4	85.2564	0.240938	0.287765	0.837274	0.402439	0.545952	0.262845
ENSMUSG00000005907_Pex1	59.8769	-0.334108	0.366111	-0.912588	0.361459	0.507588	0.294488
ENSMUSG00000005917_Otx1	24.2953	-2.89786	0.584926	-4.95424	7.26e-07	0.000156236	3.80622
ENSMUSG00000005936_Kctd20	63.4511	0.577867	0.339576	1.70173	0.0888058	0.202373	0.693848
ENSMUSG00000005947_Itgae	5.49471	-2.41201	0.799802	-3.01576	0.00256334	0.023284	1.63294
ENSMUSG00000005949_Ctns	17.5358	-0.112399	0.554345	-0.20276	0.839323	0.894772	0.0482877
ENSMUSG00000005950_P2rx5	1.89958	0.280362	0.84318	0.332506	0.739507	1	0
ENSMUSG00000005951_Shpk	9.19182	-0.721625	0.687191	-1.05011	0.293668	0.442964	0.353631
ENSMUSG00000005952_Trpv1	7.18295	-1.98805	0.761675	-2.6101	0.00905147	0.0499893	1.30112
ENSMUSG00000005958_Ephb3	7.00855	-1.8719	0.774524	-2.41684	0.0156557	0.0687872	1.16249
ENSMUSG00000005968_Tuft1	11.7811	-0.276406	0.713059	-0.387635	0.698286	0.791755	0.101409
ENSMUSG00000005973_Rcn1	14.1329	0.0969853	0.579005	0.167503	0.866974	0.91325	0.0394103
ENSMUSG00000005980_Dnase1	11.1625	-0.663505	0.711755	-0.93221	0.351228	0.498225	0.302575
ENSMUSG00000005981_Trap1	109.627	0.896025	0.297817	3.00864	0.00262421	0.0236501	1.62617
ENSMUSG00000005982_Naa60	63.0252	0.2114	0.328078	0.644357	0.519344	0.648967	0.187778
ENSMUSG00000005983_1700037C18Rik	4.4427	-0.914599	0.802836	-1.13921	0.254615	0.403431	0.394231
ENSMUSG00000005986_Ankrd13d	17.6251	0.997638	0.575478	1.73358	0.0829927	0.194076	0.712029
ENSMUSG00000005994_Tyrp1	6.94112	-1.23146	0.77308	-1.59293	0.111177	0.232785	0.633046
ENSMUSG00000006005_Tpr	973.193	0.445911	0.158501	2.81331	0.00490351	0.0347158	1.45947
ENSMUSG00000006007_Pdc	6.37606	-1.92449	0.794454	-2.42241	0.0154179	0.0680772	1.167
ENSMUSG00000006010_BC003331	172.747	0.244004	0.230178	1.06007	0.289115	0.438324	0.358205
ENSMUSG00000006014_Prg4	13.1726	-1.83408	0.685685	-2.67481	0.00747721	0.0445025	1.35162
ENSMUSG00000006019_Dhx34	15.8797	-1.32641	0.590924	-2.24463	0.0247919	0.0916789	1.03773
ENSMUSG00000006021_Kptn	8.08932	-0.337139	0.729585	-0.462097	0.644012	0.750225	0.124808
ENSMUSG00000006024_Napa	99.3533	0.787319	0.288899	2.72524	0.0064255	0.0406099	1.39137
ENSMUSG00000006050_Sra1	49.5839	0.267463	0.400781	0.667355	0.504546	0.636295	0.196342
ENSMUSG00000006056_Calcoco2	4.13846	-2.88093	0.845891	-3.4058	0.000659715	0.0102493	1.98931
ENSMUSG00000006057_Atp5g1	67.0643	0.268428	0.330154	0.813039	0.416195	0.557976	0.253384
ENSMUSG00000006058_Snf8	56.9666	-0.0336531	0.424193	-0.0793345	0.936767	0.960082	0.0176918
ENSMUSG00000006095_Tbcb	40.4773	0.557732	0.418204	1.33364	0.182322	0.322644	0.491276
ENSMUSG00000006127_Inpp5k	69.8735	0.434306	0.31749	1.36794	0.171332	0.310007	0.508628
ENSMUSG00000006134_Crkl	86.2387	1.11986	0.32395	3.4569	0.000546425	0.00920076	2.03618
ENSMUSG00000006143_Upk3bl	0.971764	-0.0827911	0.775116	-0.106811	0.914939	1	0
ENSMUSG00000006154_Eps8l1	19.3821	-0.465057	0.541003	-0.859619	0.389999	0.53387	0.272564
ENSMUSG00000006169_Clint1	161.2	0.312534	0.240278	1.30072	0.193355	0.335331	0.474526
ENSMUSG00000006179_Prss16	3.47984	-0.712272	0.833887	-0.854159	0.393017	0.536705	0.270264
ENSMUSG00000006191_Cdkal1	75.594	0.096516	0.31716	0.304314	0.760889	0.836366	0.0776038
ENSMUSG00000006200_Rhox6	1.19917	-0.164826	0.775556	-0.212526	0.831697	1	0
ENSMUSG00000006204_5430419D17Rik	11.0174	-2.61187	0.754417	-3.46211	0.000535966	0.00913689	2.0392
ENSMUSG00000006205_Htra1	205.197	0.766137	0.253041	3.02772	0.00246406	0.0227375	1.64326
ENSMUSG00000006215_Zbtb17	25.8026	0.264167	0.469093	0.563143	0.573338	0.69452	0.158315
ENSMUSG00000006216_Clcnkb	5.18846	-1.35381	0.812486	-1.66625	0.0956629	0.212427	0.67279
ENSMUSG00000006218_Fam131c	2.50379	-1.11062	0.849166	-1.3079	0.190908	0.332556	0.478135
ENSMUSG00000006219_Fblim1	6.97943	-1.43638	0.774549	-1.85447	0.0636722	0.164973	0.782588
ENSMUSG00000006221_Hspb7	6.97349	-1.04531	0.792852	-1.31842	0.187363	0.328681	0.483226
ENSMUSG00000006235_Epor	4.42433	-0.64334	0.802195	-0.801975	0.422568	0.563402	0.249182
ENSMUSG00000006241_Ccdc159	4.0422	0.132743	0.80357	0.165192	0.868793	0.914744	0.0387002
ENSMUSG00000006262_Mob1b	112.506	-0.113859	0.302673	-0.376178	0.706785	0.798481	0.0977355
ENSMUSG00000006269_Atp6v1b1	11.2009	-1.27575	0.684519	-1.86371	0.0623621	0.162688	0.788643
ENSMUSG00000006270_Vax1	0.399874	-0.430788	0.604654	-0.712454	0.476184	1	0
ENSMUSG00000006273_Atp6v1b2	268.044	1.10196	0.213007	5.17334	2.3e-07	8.57e-05	4.06702
ENSMUSG00000006276_Eps15l1	86.8555	1.11478	0.317901	3.5067	0.0004537	0.0082344	2.08437
ENSMUSG00000006281_Tep1	14.706	-0.27824	0.620326	-0.448538	0.653765	0.75754	0.120594
ENSMUSG00000006288_Ttc5	75.8392	-0.0460215	0.376249	-0.122316	0.902648	0.937893	0.0278465
ENSMUSG00000006289_Osgep	30.3855	-0.0307759	0.437402	-0.0703607	0.943907	0.965292	0.0153413
ENSMUSG00000006299_Aamp	417.694	-0.202235	0.54636	-0.370149	0.711272	0.801201	0.0962586
ENSMUSG00000006301_Tmbim1	80.942	-0.812637	0.314137	-2.58689	0.00968474	0.0518346	1.28538
ENSMUSG00000006304_Arpc2	136.781	0.574203	0.256285	2.24048	0.0250596	0.0922724	1.03493
ENSMUSG00000006307_Kmt2b	110.836	0.114623	0.266161	0.430651	0.666722	0.767322	0.115022
ENSMUSG00000006310_Zbtb32	6.92633	-1.10603	0.790272	-1.39955	0.161647	0.298475	0.525092
ENSMUSG00000006311_Etv2	0.454493	-0.430788	0.604654	-0.712454	0.476184	1	0
ENSMUSG00000006313_Upk1a	1.47584	-1.48295	0.808319	-1.83461	0.0665629	1	0
ENSMUSG00000006315_Tmem147	14.6574	1.07776	0.632857	1.703	0.088568	0.202033	0.694578
ENSMUSG00000006333_Rps9	90.4151	0.768885	0.303382	2.53438	0.0112646	0.0565321	1.2477
ENSMUSG00000006335_Tfpt	27.3686	-0.227599	0.492042	-0.462559	0.64368	0.749952	0.124966
ENSMUSG00000006342_Susd2	6.43507	-0.872552	0.733605	-1.1894	0.234281	0.381081	0.418982
ENSMUSG00000006344_Ggt5	21.9932	-2.19068	0.617279	-3.54893	0.000386802	0.00741042	2.13016
ENSMUSG00000006345_Ggt1	7.76184	-2.34194	0.765982	-3.05743	0.00223244	0.0214512	1.66855
ENSMUSG00000006356_Crip2	12.5057	-0.0349187	0.648951	-0.0538078	0.957088	0.973893	0.0114886
ENSMUSG00000006360_Crip1	6.96302	-2.04836	0.786193	-2.60541	0.00917644	0.0503563	1.29795
ENSMUSG00000006362_Cbfa2t3	39.515	0.28629	0.403379	0.70973	0.477872	0.61329	0.212334
ENSMUSG00000006369_Fbln1	6.8481	-0.273568	0.733427	-0.372999	0.709149	0.800019	0.0968999
ENSMUSG00000006373_Pgrmc1	88.4303	1.29657	0.359312	3.60848	0.000307997	0.00652352	2.18552
ENSMUSG00000006378_Gcat	8.95448	-0.946832	0.689031	-1.37415	0.169395	0.307611	0.511997
ENSMUSG00000006386_Tek	19.5112	-0.513845	0.554951	-0.925929	0.354483	0.501282	0.299918
ENSMUSG00000006389_Mpl	7.01393	-1.75097	0.78592	-2.22793	0.0258853	0.0942345	1.02579
ENSMUSG00000006390_Elovl1	15.7819	-0.587808	0.614309	-0.956861	0.338638	0.485873	0.313477
ENSMUSG00000006392_Med8	58.9081	0.145348	0.334311	0.43477	0.663729	0.764997	0.11634
ENSMUSG00000006395_Hyi	10.4216	-0.666514	0.667938	-0.997869	0.318343	0.466369	0.33127
ENSMUSG00000006398_Cdc20	4.71364	-0.453179	0.796415	-0.569024	0.56934	0.690877	0.160599
ENSMUSG00000006403_Adamts4	45.0081	0.543783	0.484278	1.12287	0.261492	0.410373	0.386821
ENSMUSG00000006411_Pvrl4	17.3289	0.171814	0.554644	0.309773	0.756734	0.833324	0.0791863
ENSMUSG00000006412_Pfdn2	69.2674	0.354287	0.345436	1.02562	0.30507	0.454139	0.342811
ENSMUSG00000006418_Rnf114	36.7795	0.0550936	0.413787	0.133145	0.894079	0.931978	0.0305944
ENSMUSG00000006423_C330007P06Rik	113.658	0.233464	0.264166	0.883778	0.376816	0.521943	0.282377
ENSMUSG00000006435_Neurl1a	31.5069	0.491432	0.467186	1.0519	0.292847	0.442259	0.354324
ENSMUSG00000006442_Srm	11.2043	0.799968	0.666968	1.19941	0.230369	0.376616	0.424101
ENSMUSG00000006445_Epha2	6.00555	-2.54167	0.802104	-3.16876	0.00153093	0.0171633	1.7654
ENSMUSG00000006456_Rbm14	39.9164	0.600049	0.42089	1.42567	0.153964	0.28919	0.538816
ENSMUSG00000006457_Actn3	1.20938	0.908641	0.758094	1.19859	0.230689	1	0
ENSMUSG00000006462_A530013C23Rik	14.3191	-1.46989	0.685432	-2.14447	0.0319956	0.107115	0.970149
ENSMUSG00000006463_Zdhhc24	47.6724	-0.666942	0.401168	-1.6625	0.0964122	0.213287	0.671037
ENSMUSG00000006464_Bbs1	31.2663	-0.256515	0.46636	-0.550035	0.582295	0.702045	0.153635
ENSMUSG00000006469_Slc34a3	0.780451	-0.636495	0.718366	-0.886032	0.3756	1	0
ENSMUSG00000006471_Ndor1	24.8395	-0.871285	0.492037	-1.77077	0.0765986	0.184711	0.733508
ENSMUSG00000006476_Nsmf	44.8396	0.969107	0.387901	2.49834	0.0124778	0.0601276	1.22093
ENSMUSG00000006494_Pdk1	45.8521	-0.545059	0.371238	-1.46822	0.142044	0.274181	0.561963
ENSMUSG00000006498_Ptbp1	35.3452	-0.123123	0.428451	-0.287368	0.77383	0.846734	0.0722532
ENSMUSG00000006517_Mvd	5.262	1.08459	0.82112	1.32087	0.186544	0.327735	0.484478
ENSMUSG00000006519_Cyba	1.26544	-0.0270642	0.807062	-0.0335342	0.973249	1	0
ENSMUSG00000006522_Itih3	183.067	0.950168	0.225818	4.20768	2.58e-05	0.00142644	2.84575
ENSMUSG00000006526_Tmem110	22.4343	0.56609	0.501321	1.1292	0.258815	0.407833	0.389518
ENSMUSG00000006527_Sfmbt1	75.4509	0.220176	0.333938	0.659332	0.509682	0.640696	0.193348
ENSMUSG00000006529_Itih1	2.06075	-0.825749	0.840677	-0.982243	0.32598	0.473912	0.324302
ENSMUSG00000006538_Ihh	3.44243	-2.25064	0.844788	-2.66415	0.00771828	0.0454317	1.34264
ENSMUSG00000006542_Prkag3	9.67264	-1.89028	0.684482	-2.76162	0.00575161	0.0381394	1.41863
ENSMUSG00000006546_Cryba2	1.04866	-1.10905	0.760154	-1.45897	0.144572	1	0
ENSMUSG00000006567_Atp7b	11.6318	-0.450749	0.621522	-0.725234	0.468308	0.60497	0.218266
ENSMUSG00000006570_Defb2	0.454493	-0.430788	0.604654	-0.712454	0.476184	1	0
ENSMUSG00000006574_Slc4a1	4.38599	-2.04037	0.813977	-2.50667	0.0121875	0.0592778	1.22711
ENSMUSG00000006575_Rundc3a	182.725	0.579933	0.23571	2.46037	0.0138793	0.064117	1.19303
ENSMUSG00000006576_Slc4a3	130.704	-0.00103989	0.314867	-0.00330263	0.997365	0.998326	0.000727515
ENSMUSG00000006585_Cdt1	4.33166	-0.87769	0.831878	-1.05507	0.291393	0.44051	0.356044
ENSMUSG00000006586_Runx1t1	64.3623	-0.432044	0.319945	-1.35037	0.176896	0.316178	0.500069
ENSMUSG00000006587_Snai3	1.98087	-1.71332	0.826322	-2.07342	0.0381328	1	0
ENSMUSG00000006589_Aprt	4.77714	-0.357128	0.797848	-0.447614	0.654432	0.757941	0.120365
ENSMUSG00000006599_Gtf2h1	67.4829	0.44	0.318815	1.38011	0.167552	0.305424	0.515097
ENSMUSG00000006611_Hfe	14.4172	0.140378	0.597918	0.234778	0.814381	0.876799	0.0571001
ENSMUSG00000006638_Abhd1	3.04723	1.25716	0.848698	1.48128	0.138531	0.269684	0.569145
ENSMUSG00000006641_Slc5a6	15.0316	-0.0975772	0.57933	-0.168431	0.866244	0.912928	0.0395633
ENSMUSG00000006642_Tcf23	12.4829	-1.38446	0.652259	-2.12257	0.0337903	0.110346	0.957243
ENSMUSG00000006649_Nphs1	6.56551	-1.73102	0.748118	-2.31383	0.020677	0.0814404	1.08916
ENSMUSG00000006651_Aplp1	286.615	0.839933	0.262429	3.20062	0.00137134	0.0159705	1.79668
ENSMUSG00000006673_Qrich1	154.407	0.54553	0.250424	2.17843	0.0293743	0.101626	0.992996
ENSMUSG00000006675_P4htm	37.5721	-0.114468	0.410047	-0.279158	0.780123	0.851162	0.0699877
ENSMUSG00000006676_Usp19	148.744	0.519587	0.26251	1.97931	0.0477816	0.137674	0.861147
ENSMUSG00000006678_Pola1	42.3712	-0.168854	0.405761	-0.416142	0.677306	0.775184	0.110595
ENSMUSG00000006699_Cdc42	238.062	0.803383	0.270004	2.97545	0.00292558	0.0252881	1.59708
ENSMUSG00000006705_Pknox1	40.9895	-0.198822	0.386938	-0.513835	0.607367	0.721319	0.141873
ENSMUSG00000006711_D130043K22Rik	24.0038	-0.00756152	0.513548	-0.0147241	0.988252	0.99279	0.00314277
ENSMUSG00000006715_Gmnn	5.92468	1.25735	0.783058	1.60569	0.108343	0.229437	0.639336
ENSMUSG00000006717_Acot13	98.8239	0.532209	0.310084	1.71634	0.0861002	0.198307	0.702662
ENSMUSG00000006720_Zfp184	9.82815	-0.849529	0.691549	-1.22844	0.21928	0.364371	0.438456
ENSMUSG00000006724_Cyp27b1	5.02241	-1.18826	0.787617	-1.50868	0.131382	0.260353	0.584437
ENSMUSG00000006728_Cdk4	25.791	0.0243992	0.496001	0.0491918	0.960766	0.976269	0.0104303
ENSMUSG00000006731_B4galnt1	35.1643	0.665643	0.436428	1.52521	0.127207	0.254759	0.593871
ENSMUSG00000006732_Mettl1	9.71137	-0.33139	0.678899	-0.488128	0.625459	0.735681	0.133311
ENSMUSG00000006736_Tspan31	28.3449	1.03831	0.484411	2.14345	0.0320772	0.107308	0.969369
ENSMUSG00000006740_Kif5b	720.442	0.594907	0.182116	3.26664	0.00108834	0.0137971	1.86021
ENSMUSG00000006763_Saal1	28.8897	-0.113073	0.445075	-0.254055	0.799453	0.866061	0.0624515
ENSMUSG00000006764_Tph2	3.55692	-1.01009	0.839491	-1.20322	0.228891	0.375078	0.425878
ENSMUSG00000006777_Krt23	0.657726	-0.345138	0.690664	-0.499719	0.617273	1	0
ENSMUSG00000006782_Cnp	210.299	0.910622	0.245681	3.70652	0.000210126	0.00508935	2.29334
ENSMUSG00000006784_Ttc25	14.0346	-1.7874	0.625325	-2.85836	0.00425841	0.0320107	1.4947
ENSMUSG00000006800_Sulf2	21.8575	-0.392079	0.514385	-0.76223	0.445923	0.584757	0.233024
ENSMUSG00000006818_Sod2	244.163	0.833209	0.212257	3.92548	8.66e-05	0.00309958	2.5087
ENSMUSG00000006850_Tmco6	4.24912	0.437021	0.821932	0.5317	0.594934	0.711271	0.147965
ENSMUSG00000006906_Stambp	81.6082	-0.0963789	0.338555	-0.284677	0.775891	0.848125	0.0715401
ENSMUSG00000006920_Ezh1	101.521	0.371432	0.269177	1.37988	0.167623	0.305532	0.514943
ENSMUSG00000006930_Hap1	51.7499	0.325919	0.384462	0.847726	0.396591	0.53989	0.267695
ENSMUSG00000006931_P3h4	5.28315	-0.192898	0.775754	-0.248659	0.803625	0.868586	0.0611872
ENSMUSG00000006932_Ctnnb1	366.262	1.04093	0.258428	4.02794	5.63e-05	0.0023546	2.62808
ENSMUSG00000006941_Eif1b	85.4127	0.5952	0.309335	1.92412	0.054339	0.149094	0.826539
ENSMUSG00000006948_Klk4	3.72414	-1.86064	0.84883	-2.19201	0.0283791	0.0995137	1.00212
ENSMUSG00000006958_Chrd	18.1471	-0.652267	0.571757	-1.14081	0.253948	0.402818	0.394892
ENSMUSG00000006998_Psmd2	274.109	0.668253	0.200141	3.33891	0.000841081	0.0119245	1.92356
ENSMUSG00000007021_Syngr3	37.8125	0.69075	0.417551	1.65429	0.098069	0.215237	0.667084
ENSMUSG00000007029_Vars	37.4263	0.399127	0.424897	0.93935	0.347551	0.494512	0.305823
ENSMUSG00000007030_Vwa7	13.3231	-0.57479	0.594059	-0.967564	0.333262	0.480636	0.318184
ENSMUSG00000007033_Hspa1l	3.63279	-0.993056	0.845745	-1.17418	0.240323	0.387952	0.411222
ENSMUSG00000007034_Slc44a4	3.3839	-1.75131	0.847115	-2.06739	0.0386979	0.120378	0.919452
ENSMUSG00000007035_Msh5	6.09686	-0.814643	0.749398	-1.08706	0.277009	0.425999	0.370591
ENSMUSG00000007036_Abhd16a	42.4446	0.611889	0.402887	1.51876	0.128822	0.257025	0.590025
ENSMUSG00000007038_Neu1	43.9695	-0.137764	0.388872	-0.354267	0.723139	0.809062	0.0920183
ENSMUSG00000007039_Ddah2	13.8938	0.199936	0.610777	0.327346	0.743406	0.823364	0.0844079
ENSMUSG00000007041_Clic1	18.8485	0.746769	0.545645	1.3686	0.171125	0.309767	0.508965
ENSMUSG00000007050_Lsm2	11.4469	-0.696798	0.654837	-1.06408	0.287293	0.436739	0.359778
ENSMUSG00000007080_Pole	12.3286	-1.64259	0.672948	-2.44088	0.0146514	0.065995	1.18049
ENSMUSG00000007097_Atp1a2	1696.37	0.648443	0.1811	3.58057	0.000342839	0.00695347	2.1578
ENSMUSG00000007107_Atp1a4	0.965168	-1.05098	0.749985	-1.40133	0.161114	1	0
ENSMUSG00000007122_Casq1	1.42466	-0.174353	0.818158	-0.213104	0.831246	1	0
ENSMUSG00000007207_Stx1a	6.44361	-0.11497	0.767311	-0.149835	0.880894	0.923607	0.0345129
ENSMUSG00000007209_Ceacam9	3.07388	-0.224842	0.844089	-0.266372	0.789952	0.858842	0.0660867
ENSMUSG00000007216_Zfp775	15.2885	-1.52652	0.616546	-2.47592	0.0132893	0.0626238	1.20326
ENSMUSG00000007279_Scube2	4.80903	-0.820509	0.801219	-1.02408	0.305799	0.454792	0.342187
ENSMUSG00000007338_Mrpl49	41.3436	0.297327	0.400698	0.742022	0.458074	0.595564	0.225071
ENSMUSG00000007379_Dennd2c	19.6759	-1.2143	0.583383	-2.08147	0.0373905	0.117711	0.929182
ENSMUSG00000007411_Mark3	124.063	0.753857	0.274821	2.74308	0.00608656	0.0393561	1.40499
ENSMUSG00000007415_Gatad1	87.1408	0.544043	0.295602	1.84046	0.0657006	0.168253	0.774038
ENSMUSG00000007440_Pcdha11	14.8661	-0.514759	0.58668	-0.877411	0.380263	0.52514	0.279725
ENSMUSG00000007457_2310003L06Rik	5.71599	-1.73342	0.80719	-2.14747	0.0317556	0.106883	0.971092
ENSMUSG00000007458_M6pr	146.752	0.501046	0.242568	2.06559	0.0388672	0.120759	0.918079
ENSMUSG00000007476_Lrrc8a	193.089	0.384294	0.232195	1.65505	0.0979151	0.2151	0.667359
ENSMUSG00000007480_Mc5r	5.30726	-1.49348	0.786446	-1.89902	0.057562	0.154458	0.81119
ENSMUSG00000007564_Ppp2r1a	208.677	0.973717	0.22685	4.29233	1.77e-05	0.00113556	2.94479
ENSMUSG00000007570_Fance	8.25432	-0.101322	0.702029	-0.144328	0.885242	0.926434	0.0331855
ENSMUSG00000007589_Tinf2	27.4033	0.233667	0.462052	0.505716	0.613056	0.725811	0.139176
ENSMUSG00000007591_Tssk4	3.9337	-0.853485	0.823894	-1.03592	0.300242	0.449518	0.347253
ENSMUSG00000007594_Hapln4	167.239	0.681028	0.265706	2.56309	0.0103744	0.0541453	1.26644
ENSMUSG00000007603_Dus3l	33.5039	0.701013	0.475631	1.47386	0.14052	0.272174	0.565153
ENSMUSG00000007610_Gtpbp3	30.439	-0.602881	0.439742	-1.37099	0.170379	0.308855	0.510246
ENSMUSG00000007613_Tgfbr1	28.8129	0.22261	0.458031	0.486015	0.626957	0.736594	0.132772
ENSMUSG00000007617_Homer1	111.58	0.523292	0.270082	1.93753	0.0526804	0.146285	0.834801
ENSMUSG00000007646_Rad51c	10.3024	-0.636072	0.653128	-0.973885	0.330114	0.477749	0.3208
ENSMUSG00000007653_Gabrb2	352.18	0.673954	0.208469	3.23287	0.00122553	0.0148833	1.8273
ENSMUSG00000007655_Cav1	5.58261	-0.44098	0.767494	-0.574572	0.565581	0.687419	0.162778
ENSMUSG00000007656_Arpp19	187.659	0.396923	0.219885	1.80514	0.0710533	0.176488	0.753286
ENSMUSG00000007659_Bcl2l1	137.909	0.470039	0.270221	1.73946	0.0819536	0.192693	0.715134
ENSMUSG00000007670_Khsrp	93.2736	0.659583	0.314427	2.09773	0.0359289	0.114979	0.939382
ENSMUSG00000007682_Dio2	76.3329	0.672144	0.306482	2.19309	0.0283008	0.0993763	1.00272
ENSMUSG00000007721_Ccdc124	103.681	0.362512	0.348793	1.03933	0.29865	0.447888	0.348831
ENSMUSG00000007739_Cct4	71.1017	0.582262	0.356296	1.63421	0.102215	0.220733	0.656133
ENSMUSG00000007777_0610009B22Rik	10.495	0.90354	0.668739	1.35111	0.17666	0.315915	0.50043
ENSMUSG00000007783_Cpt1c	23.8416	0.494586	0.519674	0.951723	0.341238	0.488166	0.311433
ENSMUSG00000007805_Twist2	3.7735	-1.38997	0.819093	-1.69696	0.0897044	0.203737	0.690931
ENSMUSG00000007812_Zfp655	79.2196	0.350757	0.313907	1.11739	0.263827	0.412658	0.38441
ENSMUSG00000007815_Rhoa	191.127	0.464889	0.238739	1.94727	0.0515021	0.144411	0.840401
ENSMUSG00000007817_Zmiz1	241.578	0.671946	0.211185	3.18178	0.00146371	0.016685	1.77767
ENSMUSG00000007827_Ankrd26	137.599	0.375857	0.263348	1.42722	0.153516	0.288662	0.53961
ENSMUSG00000007833_Aldh16a1	2.65823	0.441309	0.849089	0.519745	0.603241	0.717771	0.144014
ENSMUSG00000007836_Hnrnpa0	98.0226	1.06349	0.28877	3.6828	0.000230682	0.00543173	2.26506
ENSMUSG00000007837_Prrg2	4.31409	-0.215589	0.821653	-0.262384	0.793025	0.860987	0.0650037
ENSMUSG00000007850_Hnrnph1	406.596	0.468221	0.181155	2.58464	0.00974808	0.0520381	1.28368
ENSMUSG00000007867_Ift43	6.2725	-0.563999	0.796225	-0.708341	0.478734	0.613999	0.211832
ENSMUSG00000007872_Id3	4.75383	-0.513889	0.794839	-0.646532	0.517935	0.64789	0.188499
ENSMUSG00000007877_Tcap	3.10425	-0.459152	0.841361	-0.545725	0.585255	0.70381	0.152544
ENSMUSG00000007880_Arid1a	330.789	0.231795	0.205353	1.12877	0.258996	0.407988	0.389353
ENSMUSG00000007888_Crlf1	0.82173	0.212873	0.724732	0.293726	0.768967	1	0
ENSMUSG00000007891_Ctsd	125.824	0.863947	0.284046	3.04158	0.00235343	0.0221287	1.65504
ENSMUSG00000007892_Rplp1	147.37	0.560218	0.267574	2.09369	0.0362873	0.115581	0.937112
ENSMUSG00000007907_Cabs1	1.41657	-0.407289	0.839659	-0.485065	0.62763	1	0
ENSMUSG00000007908_Hmgcll1	26.0885	0.939993	0.573922	1.63784	0.101455	0.219762	0.658047
ENSMUSG00000007944_Ttc9b	12.031	0.25421	0.62808	0.404742	0.685667	0.781946	0.106823
ENSMUSG00000007946_Phox2a	4.24235	-2.05679	0.841138	-2.44525	0.0144753	0.0654533	1.18407
ENSMUSG00000007950_Abhd8	40.2635	1.04356	0.465994	2.23944	0.0251276	0.0924178	1.03424
ENSMUSG00000007987_Ift22	35.3651	0.00699705	0.434584	0.0161006	0.987154	0.992222	0.00339113
ENSMUSG00000007989_Fzd3	80.3444	0.354118	0.2961	1.19594	0.231719	0.377985	0.422525
ENSMUSG00000008028_1700008O03Rik	13.3908	-2.05476	0.684941	-2.99991	0.0027006	0.0240936	1.6181
ENSMUSG00000008035_Mid1ip1	178.886	0.702413	0.270594	2.59582	0.00943652	0.0511422	1.29122
ENSMUSG00000008036_Ap2s1	30.5489	0.643593	0.470457	1.36802	0.171307	0.309993	0.508649
ENSMUSG00000008090_Fgfrl1	20.5876	0.342444	0.541003	0.63298	0.526747	0.654763	0.183916
ENSMUSG00000008129_4930432K21Rik	7.96608	-2.01131	0.748027	-2.68882	0.00717059	0.0432059	1.36446
ENSMUSG00000008136_Fhl2	4.46943	-2.21469	0.828748	-2.67233	0.00753255	0.0447602	1.34911
ENSMUSG00000008140_Emc10	34.4883	2.03167	0.478715	4.24401	2.2e-05	0.00130005	2.88604
ENSMUSG00000008153_Clstn3	699.793	0.93035	0.209988	4.43048	9.4e-06	0.00077807	3.10898
ENSMUSG00000008167_Fbxw9	12.8496	-0.037056	0.647174	-0.0572581	0.95434	0.972034	0.0123185
ENSMUSG00000008193_Spib	4.81932	-0.921099	0.803452	-1.14643	0.251619	0.400242	0.397677
ENSMUSG00000008200_Fnbp4	186.353	0.0597907	0.225147	0.265563	0.790576	0.859122	0.0659453
ENSMUSG00000008206_Cers4	179.464	-0.610787	0.228379	-2.67444	0.00748532	0.0445102	1.35154
ENSMUSG00000008226_Scrn3	66.3438	-0.135452	0.320157	-0.423079	0.672237	0.77112	0.112878
ENSMUSG00000008301_Phax	56.8881	0.609559	0.366525	1.66308	0.0962967	0.213207	0.671198
ENSMUSG00000008305_Tle1	55.491	-0.18606	0.354486	-0.524872	0.599672	0.715048	0.145665
ENSMUSG00000008307_1700109H08Rik	16.6629	0.0433148	0.60058	0.0721216	0.942505	0.964312	0.0157824
ENSMUSG00000008318_Relt	15.7283	-0.0809129	0.598192	-0.135262	0.892404	0.930836	0.0311267
ENSMUSG00000008333_Snrpb2	50.7433	0.400591	0.384006	1.04319	0.29686	0.446059	0.350608
ENSMUSG00000008348_Ubc	545.142	1.10824	0.210791	5.25751	1.46e-07	6.8e-05	4.16749
ENSMUSG00000008373_Prpf31	105	-0.260044	0.298238	-0.871934	0.383244	0.527733	0.277586
ENSMUSG00000008384_Sertad1	6.7178	-0.609361	0.74647	-0.816323	0.414315	0.556219	0.254754
ENSMUSG00000008393_Carhsp1	14.2804	0.196369	0.632743	0.310345	0.756298	0.833041	0.0793339
ENSMUSG00000008398_Elk3	20.0868	-0.0641504	0.519974	-0.123372	0.901812	0.93743	0.028061
ENSMUSG00000008429_Herpud2	71.4202	0.701913	0.358099	1.96011	0.0499833	0.141706	0.848611
ENSMUSG00000008435_Rdh13	28.9237	-0.621047	0.498905	-1.24482	0.213198	0.357251	0.447026
ENSMUSG00000008438_Adam21	5.81612	-0.93514	0.81108	-1.15296	0.248928	0.397568	0.400589
ENSMUSG00000008450_Nutf2	35.7897	0.401686	0.445431	0.901791	0.367168	0.513038	0.289851
ENSMUSG00000008461_Fut1	12.4984	-2.11463	0.685533	-3.08465	0.00203793	0.0202686	1.69318
ENSMUSG00000008475_Arpc5	23.364	0.203353	0.497432	0.408806	0.682682	0.779509	0.108179
ENSMUSG00000008482_Rnf151	1.21831	-0.442861	0.803933	-0.550868	0.581724	1	0
ENSMUSG00000008489_Elavl2	42.7936	0.199065	0.402898	0.494084	0.621247	0.732218	0.135359
ENSMUSG00000008496_Pou2f2	20.227	-1.49289	0.519687	-2.87267	0.00407021	0.0311836	1.50607
ENSMUSG00000008540_Mgst1	17.9631	0.93111	0.565119	1.64763	0.0994277	0.216948	0.663645
ENSMUSG00000008575_Nfib	350.268	0.708877	0.210605	3.36591	0.000762916	0.0112366	1.94937
ENSMUSG00000008590_Htr3b	9.87263	-1.94222	0.751124	-2.58576	0.00971659	0.051962	1.28431
ENSMUSG00000008601_Rab25	1.71203	-1.28415	0.833982	-1.53978	0.123613	1	0
ENSMUSG00000008604_Ubqln4	69.2613	-0.0203285	0.324305	-0.0626834	0.950019	0.969124	0.0136206
ENSMUSG00000008658_Rbfox1	155.386	0.336905	0.230375	1.46242	0.143625	0.275992	0.559104
ENSMUSG00000008668_Rps18	83.7688	0.541188	0.298292	1.81429	0.0696332	0.174128	0.759131
ENSMUSG00000008682_Rpl10	79.4835	0.878	0.331419	2.64922	0.00806787	0.0465099	1.33245
ENSMUSG00000008683_Rps15a	72.2752	0.0672988	0.325876	0.206517	0.836387	0.892601	0.0493428
ENSMUSG00000008690_Ncaph2	63.6461	0.141111	0.330379	0.42712	0.669292	0.768957	0.114098
ENSMUSG00000008730_Hipk1	337.249	0.634452	0.192995	3.2874	0.00101118	0.0133475	1.8746
ENSMUSG00000008734_Gprc5b	479.929	0.537155	0.183274	2.93088	0.00338001	0.0277043	1.55745
ENSMUSG00000008763_Man1a2	321.858	0.447226	0.194595	2.29824	0.0215483	0.0835871	1.07786
ENSMUSG00000008789_Ceacam5	4.48278	-1.16769	0.841407	-1.38779	0.165202	0.302525	0.519239
ENSMUSG00000008822_Acyp1	23.303	0.498377	0.502487	0.991821	0.321285	0.469355	0.328499
ENSMUSG00000008843_Cldn13	3.93032	-1.18861	0.833501	-1.42605	0.153854	0.289109	0.538938
ENSMUSG00000008845_Cd163	10.8368	-0.916277	0.656332	-1.39606	0.162697	0.299599	0.52346
ENSMUSG00000008855_Hdac5	104.099	0.456909	0.310718	1.47049	0.141429	0.273442	0.563134
ENSMUSG00000008859_Rala	143.545	0.745322	0.238822	3.12083	0.00180343	0.0187904	1.72606
ENSMUSG00000008874_Clec3a	1.33209	-1.18142	0.771635	-1.53106	0.125755	1	0
ENSMUSG00000008892_Vdac3	195.187	0.813812	0.239292	3.40091	0.000671617	0.0103649	1.98444
ENSMUSG00000008932_Slc1a7	2.8795	-1.73678	0.848503	-2.04687	0.0406706	0.124196	0.905893
ENSMUSG00000008958_Vps72	69.6904	-0.447869	0.368093	-1.21673	0.223708	0.369359	0.432552
ENSMUSG00000008976_Gabpa	149.253	0.551299	0.246232	2.23895	0.0251595	0.092505	1.03383
ENSMUSG00000008999_Bmp7	12.6235	-1.81354	0.707752	-2.5624	0.0103953	0.0541479	1.26642
ENSMUSG00000009013_Dynll1	148.348	0.65873	0.244794	2.69095	0.00712479	0.0430506	1.36602
ENSMUSG00000009030_Pdcl	193.771	0.188326	0.226622	0.831013	0.405966	0.548891	0.260514
ENSMUSG00000009035_Tmem184b	144.879	0.692876	0.272306	2.54448	0.0109442	0.0558164	1.25324
ENSMUSG00000009047_Gm5965	0.588204	0.355094	0.611878	0.580334	0.561689	1	0
ENSMUSG00000009070_Rsph14	6.29338	-1.7692	0.800195	-2.21096	0.0270387	0.0966565	1.01477
ENSMUSG00000009073_Nf2	94.1715	0.263476	0.305504	0.862433	0.388449	0.532684	0.273531
ENSMUSG00000009075_Cabp7	70.197	0.142328	0.318319	0.447124	0.654785	0.758282	0.120169
ENSMUSG00000009076_Zmat5	4.57631	0.811486	0.796748	1.0185	0.308441	0.457339	0.339762
ENSMUSG00000009079_Ewsr1	349.392	0.329488	0.185521	1.77601	0.0757308	0.183544	0.73626
ENSMUSG00000009090_Ap1b1	198.156	0.599089	0.261389	2.29194	0.0219091	0.084602	1.07262
ENSMUSG00000009092_Derl3	3.90352	-1.52141	0.830423	-1.83209	0.0669382	0.17014	0.769195
ENSMUSG00000009097_Tbx1	4.59273	-1.17059	0.808859	-1.44722	0.147837	0.281614	0.550346
ENSMUSG00000009108_Gnat2	2.7643	-0.673685	0.849125	-0.793387	0.427552	0.568082	0.245589
ENSMUSG00000009112_Bcl2l13	73.6125	-0.0695541	0.318169	-0.218607	0.826956	0.885647	0.0527393
ENSMUSG00000009114_2610028H24Rik	0.374298	-0.139322	0.605133	-0.230233	0.817911	1	0
ENSMUSG00000009115_Spatc1l	1.06232	-0.862033	0.762869	-1.12999	0.258481	1	0
ENSMUSG00000009145_Dqx1	4.05402	-1.08203	0.830486	-1.30289	0.192612	0.334435	0.475688
ENSMUSG00000009207_Lnp	124.368	0.0889483	0.284618	0.312519	0.754646	0.831991	0.0798813
ENSMUSG00000009210_Prr29	2.07001	-1.84059	0.833822	-2.20741	0.0272853	0.097192	1.01237
ENSMUSG00000009214_Tmem8c	1.10434	-0.31708	0.787067	-0.402863	0.687049	1	0
ENSMUSG00000009216_Fam163b	19.0314	-0.82451	0.540602	-1.52517	0.127216	0.254759	0.593871
ENSMUSG00000009246_Trpm5	9.81626	-2.09548	0.758027	-2.76439	0.00570289	0.0380768	1.41934
ENSMUSG00000009248_Ascl2	3.56689	-2.10559	0.840032	-2.50656	0.0121912	0.0592778	1.22711
ENSMUSG00000009281_Rarres2	13.7736	-0.467677	0.611152	-0.765239	0.444129	0.583027	0.234312
ENSMUSG00000009291_Pttg1ip	59.5777	0.539153	0.385153	1.39984	0.161561	0.298336	0.525294
ENSMUSG00000009292_Trpm2	85.1612	0.0754298	0.28819	0.261736	0.793525	0.86138	0.0648053
ENSMUSG00000009293_Ube2g2	28.3594	0.31617	0.489652	0.645703	0.518471	0.648315	0.188214
ENSMUSG00000009350_Mpo	9.7798	-2.66777	0.760748	-3.50677	0.000453583	0.0082344	2.08437
ENSMUSG00000009356_Lpo	6.19279	-1.7219	0.79972	-2.15313	0.0313086	0.105847	0.97532
ENSMUSG00000009376_Met	11.0664	-1.46532	0.699372	-2.0952	0.0361536	0.115369	0.937911
ENSMUSG00000009378_Slc16a12	7.22423	-1.31632	0.71809	-1.83309	0.0667899	0.169846	0.769944
ENSMUSG00000009394_Syn2	166.631	0.718631	0.240208	2.9917	0.00277426	0.0244631	1.61149
ENSMUSG00000009406_Elk1	54.5638	0.449524	0.359272	1.25121	0.21086	0.354628	0.450227
ENSMUSG00000009418_Nav1	197.956	0.172449	0.216179	0.797715	0.425036	0.565612	0.247482
ENSMUSG00000009470_Tnpo1	220.103	0.863283	0.23973	3.60107	0.000316912	0.00663614	2.17808
ENSMUSG00000009471_Myod1	4.14269	-1.72704	0.825328	-2.09255	0.036389	0.115791	0.936326
ENSMUSG00000009487_Otog	10.3691	-3.19807	0.763976	-4.18608	2.84e-05	0.00151086	2.82078
ENSMUSG00000009535_Rnmt	117.827	0.358476	0.263654	1.35965	0.173941	0.312874	0.504631
ENSMUSG00000009545_Kcnq1	8.54088	-1.99334	0.743394	-2.68141	0.00733127	0.0439179	1.35736
ENSMUSG00000009549_Srp14	178.35	0.805189	0.231563	3.47719	0.000506703	0.00878025	2.05649
ENSMUSG00000009551_6330409D20Rik	1.73236	-0.319289	0.844488	-0.378086	0.705366	1	0
ENSMUSG00000009555_Cdk9	51.5148	-0.151393	0.36566	-0.414027	0.678854	0.776577	0.109816
ENSMUSG00000009563_Tor2a	18.3759	-0.861834	0.566748	-1.52067	0.128344	0.25634	0.591183
ENSMUSG00000009566_Fpgs	11.4393	-1.02646	0.628393	-1.63346	0.102372	0.220942	0.655721
ENSMUSG00000009569_Mkl2	133.238	0.769961	0.275697	2.79278	0.0052257	0.0362208	1.44104
ENSMUSG00000009575_Cbx5	308.193	0.36981	0.204438	1.80891	0.0704652	0.175595	0.755488
ENSMUSG00000009580_Odam	0.346988	-0.139322	0.605133	-0.230233	0.817911	1	0
ENSMUSG00000009585_Apobec3	9.01034	-0.652985	0.727597	-0.897454	0.369476	0.515037	0.288162
ENSMUSG00000009588_St6galnac1	10.6116	-2.9734	0.73544	-4.04302	5.28e-05	0.00227449	2.64312
ENSMUSG00000009596_Taf7l	0.599811	-0.527023	0.609664	-0.864449	0.387341	1	0
ENSMUSG00000009614_Sardh	20.7218	-0.192511	0.54988	-0.350097	0.726266	0.81119	0.0908774
ENSMUSG00000009621_Vav2	30.207	-0.39308	0.458996	-0.85639	0.391782	0.535548	0.271202
ENSMUSG00000009628_Tex15	18.272	-1.40093	0.591501	-2.36843	0.0178637	0.0745592	1.1275
ENSMUSG00000009630_Ppp2cb	108.95	0.876874	0.281421	3.11587	0.001834	0.0189813	1.72167
ENSMUSG00000009633_G0s2	12.6106	0.60057	0.631475	0.951059	0.341574	0.488566	0.311077
ENSMUSG00000009640_Dmap1	26.4872	-0.775729	0.473177	-1.6394	0.101129	0.219287	0.658988
ENSMUSG00000009646_Pla2g12b	1.53376	-1.01065	0.80807	-1.2507	0.211045	1	0
ENSMUSG00000009647_Mcu	39.3401	-0.0379498	0.411883	-0.0921373	0.926589	0.95393	0.0204837
ENSMUSG00000009654_Oit3	1.93603	-1.44722	0.839593	-1.72372	0.0847582	1	0
ENSMUSG00000009681_Bcr	123.684	0.663486	0.264004	2.51316	0.0119654	0.0586967	1.23139
ENSMUSG00000009687_Fxyd5	13.285	-1.36691	0.649202	-2.10552	0.0352457	0.113538	0.944858
ENSMUSG00000009731_Kcnd1	19.4584	0.0892053	0.550156	0.162146	0.871191	0.9165	0.0378674
ENSMUSG00000009733_Tfcp2	24.6418	0.591317	0.527563	1.12085	0.262353	0.4112	0.385947
ENSMUSG00000009734_Pou6f2	21.3636	-1.6628	0.644361	-2.58054	0.00986469	0.0524498	1.28026
ENSMUSG00000009739_Pou6f1	54.4672	-0.327018	0.347487	-0.941094	0.346656	0.493756	0.306487
ENSMUSG00000009741_Ubp1	87.588	0.51078	0.364203	1.40246	0.160779	0.297467	0.526562
ENSMUSG00000009772_Nuak2	10.3389	-1.76075	0.689956	-2.55197	0.0107116	0.055103	1.25882
ENSMUSG00000009828_Ick	73.115	-0.461287	0.353097	-1.30641	0.191415	0.333065	0.477471
ENSMUSG00000009863_Sdhb	92.2334	0.786438	0.302113	2.60312	0.0092379	0.0505852	1.29598
ENSMUSG00000009876_Cox4i2	4.16864	0.893292	0.8282	1.07859	0.280769	0.430499	0.366028
ENSMUSG00000009894_Snap47	170.761	0.867624	0.274125	3.16507	0.00155047	0.0172326	1.76365
ENSMUSG00000009900_Wnt3a	9.59136	-2.24792	0.752142	-2.98868	0.00280182	0.0245804	1.60941
ENSMUSG00000009905_Kdsr	136.122	0.537621	0.257368	2.08892	0.036715	0.116277	0.934507
ENSMUSG00000009907_Vps4b	90.7223	0.474419	0.287874	1.64801	0.0993511	0.216889	0.663763
ENSMUSG00000009927_Rps25	27.4285	0.85693	0.538837	1.59033	0.11176	0.233514	0.631687
ENSMUSG00000009941_Nxf2	0.374298	-0.139322	0.605133	-0.230233	0.817911	1	0
ENSMUSG00000009995_Taz	49.8972	0.283273	0.379264	0.746902	0.455123	0.593194	0.226803
ENSMUSG00000010021_Kif19a	3.71316	-1.31494	0.833203	-1.57818	0.114524	0.237521	0.624298
ENSMUSG00000010025_Aldh3a2	58.7921	0.724362	0.337472	2.14643	0.0318385	0.106966	0.970752
ENSMUSG00000010044_Zmynd10	1.13215	-1.02025	0.744551	-1.3703	0.170595	1	0
ENSMUSG00000010045_Tmem115	28.4127	-0.0442928	0.468346	-0.0945728	0.924654	0.952469	0.021149
ENSMUSG00000010047_Hyal2	15.9626	-0.588248	0.592104	-0.993487	0.320472	0.468656	0.329146
ENSMUSG00000010048_Ifrd2	4.55096	0.367689	0.817579	0.449729	0.652906	0.756954	0.12093
ENSMUSG00000010051_Hyal1	16.128	-0.595039	0.557141	-1.06802	0.285511	0.435056	0.361454
ENSMUSG00000010054_Tusc2	55.2417	0.304803	0.38608	0.789481	0.429831	0.569995	0.244129
ENSMUSG00000010057_Nprl2	14.5118	0.86736	0.626705	1.384	0.166358	0.303982	0.517153
ENSMUSG00000010064_Slc38a3	33.5556	-0.174311	0.44338	-0.393142	0.694215	0.788662	0.103109
ENSMUSG00000010066_Cacna2d2	575.481	0.737776	0.202976	3.6348	0.0002782	0.00614971	2.21115
ENSMUSG00000010067_Rassf1	16.531	0.252202	0.575865	0.437953	0.66142	0.763339	0.117282
ENSMUSG00000010080_Epn3	7.27569	-0.334413	0.735685	-0.454559	0.649426	0.754241	0.12249
ENSMUSG00000010086_Rnf112	102.333	0.209392	0.275379	0.760379	0.447028	0.5857	0.232325
ENSMUSG00000010095_Slc3a2	101.021	0.567809	0.311226	1.82443	0.0680875	0.17186	0.764826
ENSMUSG00000010097_Nxf1	117.571	0.589334	0.30062	1.96039	0.0499501	0.141659	0.848756
ENSMUSG00000010110_Stx5a	66.661	0.000567491	0.362451	0.00156571	0.998751	0.999138	0.000374643
ENSMUSG00000010122_Slc47a1	2.80495	-1.44414	0.847138	-1.70472	0.0882458	0.201612	0.695484
ENSMUSG00000010142_Tnfrsf13b	6.28521	-1.50204	0.752341	-1.99649	0.0458806	0.134274	0.87201
ENSMUSG00000010154_Spire2	12.2139	0.45563	0.654536	0.696111	0.48636	0.620176	0.207485
ENSMUSG00000010175_Prox1	69.8711	0.0643662	0.330618	0.194684	0.84564	0.899093	0.0461952
ENSMUSG00000010205_Raver1	45.1513	0.383639	0.377734	1.01563	0.309804	0.458528	0.338634
ENSMUSG00000010277_2610507B11Rik	397.082	0.730317	0.185721	3.93234	8.41e-05	0.00305921	2.51439
ENSMUSG00000010290_AI597479	73.548	0.591058	0.337421	1.75169	0.0798269	0.189657	0.722031
ENSMUSG00000010307_Tmem86a	5.56266	-0.341215	0.771529	-0.442258	0.658303	0.760829	0.118713
ENSMUSG00000010311_Optc	6.7933	-2.15993	0.750826	-2.87675	0.00401799	0.0309858	1.50884
ENSMUSG00000010342_Tex14	8.2711	-0.902538	0.701821	-1.28599	0.198445	0.341031	0.467206
ENSMUSG00000010358_Ifi35	4.57758	-0.793428	0.787642	-1.00735	0.313769	0.46237	0.33501
ENSMUSG00000010362_Rdm1	1.8919	-0.212119	0.837921	-0.253149	0.800153	1	0
ENSMUSG00000010376_Nedd8	127.747	0.246124	0.25275	0.973785	0.330163	0.477749	0.3208
ENSMUSG00000010392_Gosr1	79.3453	0.30487	0.307869	0.990261	0.322047	0.470141	0.327772
ENSMUSG00000010406_Mrpl52	15.4935	0.340006	0.578848	0.587384	0.556946	0.680249	0.167332
ENSMUSG00000010453_Kansl3	111.43	0.393533	0.271597	1.44896	0.147349	0.280935	0.551393
ENSMUSG00000010461_Eya4	3.54741	-0.659315	0.84675	-0.778642	0.436191	0.575561	0.239908
ENSMUSG00000010476_Ebf3	57.2751	0.111769	0.346335	0.322719	0.746908	0.825815	0.0831173
ENSMUSG00000010492_Uckl1os	13.9875	-1.20891	0.591889	-2.04245	0.0411065	0.125112	0.9027
ENSMUSG00000010505_Myt1	144.479	0.10706	0.260569	0.410872	0.681167	0.778463	0.108762
ENSMUSG00000010517_Faf1	80.3253	0.688452	0.321335	2.14248	0.0321553	0.107495	0.968611
ENSMUSG00000010529_Gm266	8.30782	-0.454327	0.692075	-0.65647	0.511521	0.642238	0.192304
ENSMUSG00000010538_Tsacc	1.00312	0.121182	0.783381	0.154691	0.877065	1	0
ENSMUSG00000010554_Mettl16	128.574	-0.184294	0.247095	-0.745844	0.455762	0.593619	0.226492
ENSMUSG00000010592_Dazl	8.23248	-2.27481	0.75344	-3.01923	0.00253419	0.0231039	1.63631
ENSMUSG00000010601_Apol7a	6.91713	-1.89507	0.753441	-2.51522	0.011896	0.0585366	1.23257
ENSMUSG00000010607_Pigyl	41.3385	0.040201	0.436539	0.0920902	0.926626	0.95393	0.0204835
ENSMUSG00000010608_Rbm25	863.661	-0.0740463	0.165478	-0.447468	0.654537	0.758029	0.120314
ENSMUSG00000010609_Psen2	34.992	-0.332313	0.427127	-0.778021	0.436557	0.575897	0.239655
ENSMUSG00000010651_Acaa1b	1.05604	-0.612166	0.735798	-0.831977	0.405422	1	0
ENSMUSG00000010660_Plcd1	3.77424	0.38576	0.818146	0.471505	0.63728	0.744847	0.127933
ENSMUSG00000010663_Fads1	98.2091	0.730946	0.298062	2.45233	0.0141934	0.0648027	1.18841
ENSMUSG00000010721_Lmbr1	56.826	0.0470371	0.353273	0.133147	0.894078	0.931978	0.0305944
ENSMUSG00000010751_Tnfrsf22	17.6833	-2.14343	0.650633	-3.29437	0.000986412	0.0131713	1.88037
ENSMUSG00000010755_Cars	54.9178	0.30022	0.346014	0.867654	0.385584	0.530106	0.275638
ENSMUSG00000010760_Phlda2	1.07597	-0.997993	0.740252	-1.34818	0.177601	1	0
ENSMUSG00000010796_Asz1	0.974108	-0.65083	0.754717	-0.862351	0.388495	1	0
ENSMUSG00000010797_Wnt2	4.24141	-0.771794	0.842463	-0.916116	0.359606	0.505683	0.296121
ENSMUSG00000010803_Gabra1	2113.05	0.708261	0.198216	3.57318	0.000352677	0.00705874	2.15127
ENSMUSG00000010825_Grid2ip	279.995	0.408566	0.228989	1.78421	0.0743889	0.181587	0.740915
ENSMUSG00000010830_Kdelr3	1.36038	-0.352016	0.828229	-0.425022	0.670821	1	0
ENSMUSG00000010911_Apip	28.5958	0.505463	0.470749	1.07374	0.282939	0.432456	0.364058
ENSMUSG00000010914_Pdhx	130.497	0.420529	0.263986	1.593	0.111161	0.23277	0.633073
ENSMUSG00000010936_Vac14	34.4416	0.560653	0.434993	1.28888	0.19744	0.339941	0.468596
ENSMUSG00000011008_Mcoln2	5.04478	-1.50484	0.836388	-1.79922	0.0719842	0.177904	0.749815
ENSMUSG00000011034_Slc5a1	58.4727	0.33153	0.351524	0.943124	0.345618	0.492685	0.307431
ENSMUSG00000011096_Akt1s1	21.0515	-0.387745	0.530532	-0.73086	0.464864	0.601711	0.220612
ENSMUSG00000011114_Tbrg1	24.2296	0.011483	0.47737	0.0240548	0.980809	0.988389	0.00507225
ENSMUSG00000011118_Panx3	4.2122	-1.1011	0.843914	-1.30475	0.191979	0.333728	0.476608
ENSMUSG00000011148_Adssl1	11.9099	0.571051	0.636193	0.897605	0.369396	0.514952	0.288233
ENSMUSG00000011154_Cfap161	9.99653	0.113565	0.697611	0.162792	0.870682	0.916174	0.0380223
ENSMUSG00000011158_Brf1	34.6503	0.314084	0.434842	0.722294	0.470114	0.606378	0.217257
ENSMUSG00000011171_Vipr2	19.0496	0.53445	0.543881	0.982659	0.325775	0.473843	0.324365
ENSMUSG00000011179_Odc1	59.4368	1.00471	0.356465	2.81854	0.00482425	0.0343796	1.4637
ENSMUSG00000011254_Thg1l	13.9738	-0.325975	0.580672	-0.561375	0.574542	0.695587	0.157648
ENSMUSG00000011256_Adam19	41.6934	-0.699082	0.411703	-1.69803	0.0895028	0.203436	0.691571
ENSMUSG00000011257_Pabpc4	31.619	0.522051	0.4453	1.17236	0.241053	0.388887	0.410176
ENSMUSG00000011263_Exoc3l2	10.7621	-2.08604	0.727479	-2.86749	0.00413747	0.0314562	1.50229
ENSMUSG00000011267_Zfp296	5.19481	-1.744	0.822051	-2.12153	0.0338774	0.110551	0.956437
ENSMUSG00000011305_Plin5	2.34418	-0.989349	0.846828	-1.1683	0.242686	0.390667	0.408193
ENSMUSG00000011306_Sugp1	54.9675	0.339535	0.375411	0.904434	0.365765	0.511631	0.291043
ENSMUSG00000011350_Gm5893	5.12796	-2.25272	0.820981	-2.74394	0.00607064	0.0393396	1.40517
ENSMUSG00000011382_Dhdh	32.4314	-0.397645	0.465096	-0.854973	0.392566	0.536271	0.270616
ENSMUSG00000011427_Zfp790	47.8831	0.232372	0.365738	0.63535	0.5252	0.653438	0.184796
ENSMUSG00000011463_Cpb1	4.03343	-0.724748	0.834555	-0.868424	0.385162	0.529667	0.275997
ENSMUSG00000011486_Slc25a41	1.07597	-0.997993	0.740252	-1.34818	0.177601	1	0
ENSMUSG00000011589_Fsd1	8.87554	0.237671	0.683693	0.347629	0.728119	0.812311	0.0902778
ENSMUSG00000011632_Pinlyp	0.537985	-0.470718	0.626119	-0.751802	0.45217	1	0
ENSMUSG00000011658_Fuz	33.4128	-0.337652	0.414879	-0.813857	0.415727	0.557506	0.253751
ENSMUSG00000011751_Sptbn4	266.081	0.306441	0.202733	1.51155	0.130649	0.259514	0.585839
ENSMUSG00000011752_Pgam1	264.811	0.987547	0.231498	4.2659	1.99e-05	0.00122683	2.91122
ENSMUSG00000011831_Evi5	149.551	0.5456	0.235428	2.31748	0.0204775	0.0809785	1.09163
ENSMUSG00000011832_Evi5l	94.2026	0.136476	0.307197	0.444264	0.656852	0.759857	0.119268
ENSMUSG00000011837_Snapc2	10.5425	0.458503	0.648762	0.706735	0.479731	0.61476	0.211294
ENSMUSG00000011877_Git1	76.1699	0.495555	0.304808	1.62579	0.103994	0.223259	0.651191
ENSMUSG00000011884_Gltp	14.9064	0.242492	0.58133	0.417133	0.676581	0.774526	0.110964
ENSMUSG00000011958_Bnip2	65.2864	0.690054	0.336799	2.04886	0.0404758	0.123835	0.907156
ENSMUSG00000011960_Ccnt1	119.522	0.0860943	0.265166	0.324681	0.745423	0.824932	0.0835816
ENSMUSG00000012017_Scarf2	1.07754	-0.772159	0.790153	-0.977227	0.328457	1	0
ENSMUSG00000012042_4930579F01Rik	5.05794	-2.84399	0.824886	-3.44774	0.000565301	0.00940406	2.02668
ENSMUSG00000012076_Brms1l	186.919	0.220087	0.216302	1.0175	0.308917	0.457756	0.339366
ENSMUSG00000012114_Med15	73.4613	0.939841	0.343693	2.73453	0.00624687	0.0400318	1.3976
ENSMUSG00000012117_Dhdds	46.723	0.336853	0.37826	0.890535	0.373179	0.518461	0.285284
ENSMUSG00000012123_Aim1l	11.8304	-2.16913	0.698869	-3.10377	0.00191072	0.01953	1.7093
ENSMUSG00000012126_Ubxn11	15.6461	-1.15886	0.591296	-1.95987	0.0500113	0.141739	0.84851
ENSMUSG00000012187_Mogat1	3.73748	-0.998309	0.838498	-1.19059	0.233814	0.380524	0.419618
ENSMUSG00000012211_Tex22	4.36045	-1.63897	0.835609	-1.96141	0.0498312	0.141424	0.849476
ENSMUSG00000012282_Wnt8a	3.44229	-1.12915	0.843341	-1.33891	0.180601	0.320477	0.494203
ENSMUSG00000012296_Tjap1	21.108	0.111318	0.543213	0.204925	0.837631	0.893521	0.048895
ENSMUSG00000012350_Ehf	17.875	-1.5479	0.612163	-2.52857	0.0114528	0.0571621	1.24289
ENSMUSG00000012396_Nanog	5.20383	-1.58226	0.811223	-1.95046	0.0511214	0.143749	0.842395
ENSMUSG00000012405_Rpl15	109.161	0.478759	0.289217	1.65536	0.0978514	0.214997	0.667568
ENSMUSG00000012422_Tmem167	108.927	0.327526	0.318418	1.0286	0.303666	0.452754	0.344137
ENSMUSG00000012428_Steap4	11.7668	-2.48435	0.708978	-3.50412	0.000458117	0.00825506	2.08328
ENSMUSG00000012429_Mplkip	28.1559	-0.0903591	0.480714	-0.187969	0.850901	0.902483	0.0445612
ENSMUSG00000012443_Kif11	7.89078	-0.72869	0.713741	-1.02094	0.307281	0.456116	0.340925
ENSMUSG00000012483_Rpa3	6.27689	0.242891	0.749953	0.323875	0.746033	0.825201	0.0834403
ENSMUSG00000012519_Mlkl	4.57833	-1.08749	0.809508	-1.3434	0.179143	0.31881	0.496469
ENSMUSG00000012520_Phox2b	6.92677	-2.25129	0.785746	-2.86516	0.00416797	0.0316323	1.49987
ENSMUSG00000012535_Tnpo3	126.022	0.281722	0.255281	1.10357	0.269778	0.418593	0.378208
ENSMUSG00000012609_Ttll5	754.05	0.373923	0.180887	2.06717	0.0387184	0.120413	0.919326
ENSMUSG00000012640_Zfp715	45.6427	0.304496	0.390847	0.779067	0.43594	0.575349	0.240069
ENSMUSG00000012705_Retn	4.13654	-1.43259	0.815613	-1.75646	0.0790103	0.188415	0.724885
ENSMUSG00000012777_Acpt	1.0543	-1.00627	0.741916	-1.35632	0.174998	1	0
ENSMUSG00000012819_Cdh23	23.4564	-1.73996	0.531063	-3.27636	0.00105154	0.0135885	1.86683
ENSMUSG00000012848_Rps5	31.3004	1.15525	0.446986	2.58453	0.0097513	0.0520399	1.28366
ENSMUSG00000012889_Podnl1	7.40199	-1.81459	0.758934	-2.39097	0.0168041	0.0718823	1.14338
ENSMUSG00000013033_Adgrl1	272.004	0.72628	0.209304	3.46997	0.000520521	0.00895132	2.04811
ENSMUSG00000013076_Amotl1	66.1174	-0.14962	0.327377	-0.457027	0.647652	0.752959	0.123229
ENSMUSG00000013083_2200002J24Rik	1.11551	-0.41819	0.76618	-0.545811	0.585196	1	0
ENSMUSG00000013089_Etv5	129.525	0.766326	0.253952	3.0176	0.00254789	0.0231725	1.63503
ENSMUSG00000013091_Tmem190	0.624856	0.0578056	0.686413	0.084214	0.932886	1	0
ENSMUSG00000013150_Gfod2	37.3815	-0.376482	0.400415	-0.940228	0.3471	0.494171	0.306123
ENSMUSG00000013155_Enkd1	5.09818	-0.431421	0.781579	-0.551986	0.580958	0.700989	0.154289
ENSMUSG00000013158_4933405L10Rik	2.99925	-1.21748	0.84628	-1.43863	0.150256	0.284584	0.54579
ENSMUSG00000013160_Atp6v0d1	125.399	0.880096	0.255551	3.44392	0.000573351	0.00949542	2.02249
ENSMUSG00000013236_Ptprs	289.139	0.856026	0.227439	3.76376	0.000167381	0.0045167	2.34518
ENSMUSG00000013275_Slc41a1	79.9724	0.237723	0.307943	0.77197	0.440132	0.5794	0.237022
ENSMUSG00000013338_Fer1l4	12.4849	-3.21468	0.71726	-4.48189	7.4e-06	0.000702288	3.15348
ENSMUSG00000013353_4931406B18Rik	25.1512	-2.14873	0.56171	-3.82533	0.000130594	0.00390709	2.40815
ENSMUSG00000013367_Iglon5	43.6084	-0.194714	0.391837	-0.496927	0.61924	0.730721	0.136248
ENSMUSG00000013415_Igf2bp1	20.0958	-3.14121	0.626048	-5.01752	5.23e-07	0.00013873	3.85783
ENSMUSG00000013418_B4galnt2	1.47914	-0.981426	0.804982	-1.21919	0.222772	1	0
ENSMUSG00000013419_Zfp651	63.4665	-0.619408	0.358936	-1.72568	0.0844051	0.1961	0.707522
ENSMUSG00000013465_Nelfb	33.3295	0.646121	0.449824	1.43639	0.150892	0.285327	0.544657
ENSMUSG00000013483_Card14	5.7764	-1.45452	0.826644	-1.75955	0.0784836	0.187627	0.726705
ENSMUSG00000013495_Tmem175	38.2127	0.365717	0.423758	0.863032	0.38812	0.532458	0.273715
ENSMUSG00000013523_Bcas1	37.5256	0.118924	0.444003	0.267846	0.788818	0.857964	0.066531
ENSMUSG00000013539_Tango2	54.3804	-0.571127	0.356077	-1.60394	0.108727	0.229833	0.638587
ENSMUSG00000013562_4833413E03Rik	1.28516	-0.0105743	0.804571	-0.0131428	0.989514	1	0
ENSMUSG00000013584_Aldh1a2	3.76554	0.423549	0.834386	0.507617	0.611722	0.72463	0.139884
ENSMUSG00000013593_Ndufs2	191.72	0.875148	0.263991	3.31507	0.000916194	0.0126161	1.89907
ENSMUSG00000013611_Snx31	2.3594	-0.92101	0.848913	-1.08493	0.277953	0.427162	0.369407
ENSMUSG00000013622_Atraid	21.9106	1.18628	0.528691	2.2438	0.0248453	0.0918256	1.03704
ENSMUSG00000013629_Cad	27.4986	0.190919	0.456361	0.418352	0.67569	0.773814	0.111363
ENSMUSG00000013643_Lypd8	0.968464	-0.614051	0.749605	-0.819166	0.412692	1	0
ENSMUSG00000013646_Sh3bp5l	59.1432	-0.147253	0.356492	-0.413062	0.679562	0.777179	0.109479
ENSMUSG00000013653_1810065E05Rik	0.841027	0.000891585	0.69736	0.00127851	0.99898	1	0
ENSMUSG00000013662_Atad1	119.048	0.966482	0.300502	3.21623	0.00129888	0.0154139	1.81209
ENSMUSG00000013663_Pten	350.403	0.868936	0.223521	3.88749	0.000101288	0.00337095	2.47225
ENSMUSG00000013668_4933402N03Rik	6.47554	-2.35538	0.796406	-2.95751	0.00310131	0.0263107	1.57987
ENSMUSG00000013698_Pea15a	774.406	0.262698	0.229938	1.14247	0.253258	0.402071	0.395697
ENSMUSG00000013701_Timm23	86.2633	0.504136	0.305399	1.65075	0.0987905	0.216269	0.665006
ENSMUSG00000013707_Tnfaip8l2	2.94165	-0.889523	0.845716	-1.0518	0.292892	0.442259	0.354324
ENSMUSG00000013736_Trnt1	111.431	0.728156	0.261253	2.78717	0.00531707	0.0366478	1.43595
ENSMUSG00000013766_Ly6g6e	2.13201	-1.36362	0.834335	-1.63438	0.10218	0.220676	0.656246
ENSMUSG00000013787_Ehmt2	78.4381	0.00638069	0.359506	0.0177485	0.985839	0.991484	0.00371409
ENSMUSG00000013822_Elof1	12.4777	0.408622	0.616642	0.662657	0.50755	0.639042	0.194471
ENSMUSG00000013833_Med16	28.3978	-0.996874	0.51697	-1.9283	0.0538176	0.148342	0.828737
ENSMUSG00000013846_St3gal1	20.5528	-1.89121	0.539604	-3.5048	0.000456942	0.00825506	2.08328
ENSMUSG00000013858_Tmem259	53.5124	0.599543	0.368546	1.62678	0.103784	0.223073	0.651553
ENSMUSG00000013878_Rnf170	91.536	0.52552	0.303563	1.73117	0.0834211	0.194602	0.710854
ENSMUSG00000013921_Clip3	594.253	0.741731	0.220993	3.35636	0.000789769	0.0114879	1.93976
ENSMUSG00000013928_Thap8	6.23904	-1.08901	0.747514	-1.45684	0.14516	0.277991	0.555969
ENSMUSG00000013936_Myl2	0.427184	-0.430788	0.604654	-0.712454	0.476184	1	0
ENSMUSG00000013973_Dedd	19.1688	0.193025	0.550179	0.350841	0.725708	0.810847	0.0910613
ENSMUSG00000013974_Mcemp1	5.27282	-0.322706	0.813839	-0.396523	0.69172	0.786797	0.104137
ENSMUSG00000013997_Nit1	27.7293	0.478313	0.466401	1.02554	0.305108	0.45417	0.342781
ENSMUSG00000014030_Pax5	17.221	-2.35177	0.607521	-3.8711	0.000108344	0.00352159	2.45326
ENSMUSG00000014039_Prdm15	38.2325	-0.236997	0.39597	-0.598522	0.549491	0.674366	0.171104
ENSMUSG00000014074_Rnf168	84.6486	0.286383	0.295947	0.967683	0.333203	0.480636	0.318184
ENSMUSG00000014075_Tctex1d2	14.863	0.02734	0.634607	0.0430818	0.965636	0.979522	0.00898595
ENSMUSG00000014077_Chp1	64.9427	0.44364	0.340172	1.30416	0.192178	0.333973	0.476288
ENSMUSG00000014104_Sval2	0.574235	-0.319799	0.673232	-0.475021	0.634772	1	0
ENSMUSG00000014158_Trpv4	5.18155	-1.19295	0.819473	-1.45575	0.145462	0.278425	0.555292
ENSMUSG00000014164_Klhl3	33.127	0.314849	0.43515	0.72354	0.469348	0.605753	0.217704
ENSMUSG00000014177_Tvp23b	20.7695	0.32803	0.511196	0.641691	0.521074	0.650239	0.186927
ENSMUSG00000014195_Dnajc7	314.409	0.617971	0.185699	3.32782	0.000875298	0.0122483	1.91192
ENSMUSG00000014198_Zfp385c	113.72	0.519573	0.274938	1.88978	0.0587874	0.156768	0.804741
ENSMUSG00000014226_Cacybp	207.712	0.616002	0.219215	2.81004	0.00495353	0.0349774	1.45621
ENSMUSG00000014232_Cluap1	63.8705	0.522074	0.349801	1.49249	0.135571	0.26586	0.575347
ENSMUSG00000014243_Zswim7	5.03382	0.0527597	0.782152	0.0674545	0.94622	0.966662	0.0147253
ENSMUSG00000014245_Pigl	8.58238	-0.174999	0.70394	-0.248599	0.803671	0.8686	0.0611803
ENSMUSG00000014294_Ndufa2	63.3734	0.906673	0.332592	2.72608	0.00640908	0.0405649	1.39185
ENSMUSG00000014301_Pam16	21.9698	0.740965	0.521309	1.42135	0.155214	0.29046	0.536914
ENSMUSG00000014303_Glis2	14.3687	-0.396905	0.6162	-0.644116	0.5195	0.649067	0.18771
ENSMUSG00000014313_Cox6c	1008.89	0.939193	0.148877	6.30852	2.82e-10	6.65e-07	6.17718
ENSMUSG00000014329_Bicc1	17.336	-1.34443	0.582133	-2.30949	0.0209166	0.0819618	1.08639
ENSMUSG00000014349_Ube2z	58.7441	0.596653	0.347845	1.71528	0.0862937	0.198599	0.702023
ENSMUSG00000014353_Tmem87b	70.735	0.985538	0.329014	2.99543	0.00274058	0.0242741	1.61486
ENSMUSG00000014355_Anapc1	211.716	0.48191	0.221657	2.17413	0.0296956	0.102242	0.990372
ENSMUSG00000014361_Mertk	72.1224	0.758553	0.321165	2.36188	0.0181824	0.0754501	1.12234
ENSMUSG00000014402_Tsg101	79.0908	0.643543	0.331072	1.94382	0.0519176	0.144962	0.838747
ENSMUSG00000014418_Hps5	44.564	-0.00740771	0.377947	-0.0195999	0.984363	0.990501	0.00414522
ENSMUSG00000014426_Map3k4	121.754	0.556955	0.273564	2.03592	0.0417583	0.126416	0.898197
ENSMUSG00000014444_Piezo1	22.2268	-1.35527	0.556173	-2.43677	0.014819	0.0664025	1.17782
ENSMUSG00000014453_Blk	1.74107	-0.810971	0.815296	-0.994695	0.319885	1	0
ENSMUSG00000014470_Rnf166	31.9343	0.191426	0.451249	0.424214	0.67141	0.77065	0.113143
ENSMUSG00000014496_Ankrd28	76.4786	0.580713	0.329184	1.7641	0.0777157	0.186516	0.729284
ENSMUSG00000014498_Ankrd52	97.4408	0.382608	0.281094	1.36114	0.17347	0.312309	0.505416
ENSMUSG00000014503_Pkd2l2	1.32959	0.345527	0.791972	0.436286	0.662629	1	0
ENSMUSG00000014504_Srp19	58.8291	1.05917	0.372632	2.8424	0.00447759	0.0328683	1.48322
ENSMUSG00000014529_Tmbim7	1.88639	-1.02232	0.838452	-1.21929	0.222733	1	0
ENSMUSG00000014542_Clec4f	4.3114	-1.76015	0.827632	-2.12673	0.0334422	0.109686	0.959851
ENSMUSG00000014543_Klra17	0.469713	-0.327785	0.606419	-0.540526	0.588834	1	0
ENSMUSG00000014547_Wdfy2	8.44123	0.944389	0.719225	1.31306	0.189161	0.330824	0.480403
ENSMUSG00000014550_Rbsn	119.336	-0.0560748	0.249377	-0.22486	0.822088	0.881872	0.0545945
ENSMUSG00000014551_Mrps25	186.9	0.621805	0.265804	2.33934	0.0193179	0.078079	1.10747
ENSMUSG00000014554_Dguok	26.1871	0.359179	0.478253	0.751022	0.452639	0.590864	0.228513
ENSMUSG00000014592_Camta1	388.233	0.560137	0.183641	3.05017	0.00228713	0.0217659	1.66222
ENSMUSG00000014599_Csf1	22.4855	-1.44053	0.500264	-2.87954	0.00398262	0.0308173	1.51121
ENSMUSG00000014601_Strip1	57.1952	0.456383	0.34384	1.32731	0.184405	0.325061	0.488036
ENSMUSG00000014602_Kif1a	1343.9	0.807383	0.169379	4.76671	1.87e-06	0.000276272	3.55866
ENSMUSG00000014603_Alx3	1.9319	-1.38082	0.841456	-1.64099	0.1008	1	0
ENSMUSG00000014606_Slc25a11	36.816	0.465869	0.430203	1.08291	0.27885	0.428193	0.36836
ENSMUSG00000014609_Chrne	2.76697	-2.07498	0.849233	-2.44336	0.0145512	0.0657044	1.18241
ENSMUSG00000014633_Cmc2	11.3543	0.0319307	0.669018	0.0477277	0.961933	0.97707	0.0100741
ENSMUSG00000014668_Chfr	59.3769	0.248164	0.35464	0.699763	0.484075	0.618332	0.208779
ENSMUSG00000014686_Ceacam16	1.02465	-0.441381	0.800606	-0.551309	0.581422	1	0
ENSMUSG00000014704_Hoxa2	5.37545	-1.80075	0.832036	-2.16427	0.0304438	0.103823	0.983705
ENSMUSG00000014725_Adam28	2.54741	-0.821123	0.846948	-0.969509	0.332291	0.479644	0.319081
ENSMUSG00000014747_Ankrd53	4.19266	-0.223463	0.813637	-0.274647	0.783588	0.853684	0.0687031
ENSMUSG00000014748_Tex261	128.054	0.678544	0.269794	2.51505	0.0119016	0.0585441	1.23252
ENSMUSG00000014763_Fam120b	115.99	0.73144	0.308322	2.37232	0.0176765	0.0741134	1.1301
ENSMUSG00000014767_Tbp	100.341	-0.103877	0.270106	-0.384577	0.700551	0.793521	0.100441
ENSMUSG00000014769_Psmb1	94.8839	1.00007	0.313707	3.1879	0.00143309	0.0164157	1.78474
ENSMUSG00000014771_Pdcd2	11.854	1.08372	0.647563	1.67354	0.0942202	0.210221	0.677325
ENSMUSG00000014773_Dll1	17.2382	-1.0352	0.546078	-1.8957	0.0579991	0.155211	0.809077
ENSMUSG00000014776_Nol3	17.0506	-1.23121	0.56119	-2.19393	0.0282401	0.0992961	1.00307
ENSMUSG00000014778_Fhod1	13.671	-2.67476	0.659128	-4.05803	4.95e-05	0.00218422	2.6607
ENSMUSG00000014782_Plekhg4	9.28631	-0.721069	0.698976	-1.03161	0.302256	0.451043	0.345782
ENSMUSG00000014786_Slc9a5	36.3408	-0.179985	0.422926	-0.425571	0.670421	0.769931	0.113548
ENSMUSG00000014791_Elmo3	5.36724	0.45655	0.778673	0.586317	0.557662	0.68077	0.167
ENSMUSG00000014813_Stc1	11.5287	-2.72261	0.719423	-3.78443	0.00015406	0.00430019	2.36651
ENSMUSG00000014837_4931428F04Rik	25.6481	-0.250653	0.481595	-0.520465	0.602739	0.717415	0.14423
ENSMUSG00000014846_Tppp3	29.9719	0.647668	0.470455	1.37669	0.168609	0.306745	0.513222
ENSMUSG00000014850_Msh3	87.8098	-0.122317	0.309868	-0.394738	0.693036	0.787913	0.103522
ENSMUSG00000014852_Adamts13	3.48999	-1.45598	0.840185	-1.73293	0.0831084	0.194232	0.71168
ENSMUSG00000014856_Tmem208	13.3615	0.386591	0.677307	0.570777	0.568151	0.689888	0.161221
ENSMUSG00000014859_E2f4	44.3686	0.47647	0.410577	1.16049	0.245849	0.394089	0.404406
ENSMUSG00000014867_Surf4	55.8572	0.691948	0.366103	1.89004	0.0587532	0.156726	0.804859
ENSMUSG00000014873_Surf2	51.5276	-0.0809563	0.355332	-0.227833	0.819776	0.880478	0.0552816
ENSMUSG00000014905_Dnajb9	70.2418	1.01596	0.324867	3.1273	0.00176422	0.0186148	1.73014
ENSMUSG00000014907_Naf1	25.2399	0.647215	0.476455	1.3584	0.174338	0.313369	0.503944
ENSMUSG00000014932_Yes1	86.7895	0.511548	0.315953	1.61906	0.105433	0.225142	0.647544
ENSMUSG00000014956_Ppp1cb	421.504	0.880608	0.198812	4.42935	9.45e-06	0.000779665	3.10809
ENSMUSG00000014959_Gorasp2	64.7231	0.447893	0.333634	1.34247	0.179444	0.319126	0.496038
ENSMUSG00000014980_Tsen15	38.4262	0.0426125	0.400911	0.106289	0.915353	0.94615	0.02404
ENSMUSG00000015001_Oc90	2.63624	-1.68708	0.84886	-1.98747	0.0468706	0.135892	0.866807
ENSMUSG00000015002_Efr3a	659.99	0.591096	0.225916	2.61645	0.00888504	0.0493825	1.30643
ENSMUSG00000015013_Trappc2l	8.57095	1.15179	0.715671	1.60939	0.107531	0.228261	0.641568
ENSMUSG00000015016_Acsf3	16.4464	0.131415	0.585813	0.224329	0.822502	0.882231	0.0544179
ENSMUSG00000015023_Ddx19a	64.5696	0.384767	0.386587	0.995294	0.319593	0.467806	0.329934
ENSMUSG00000015027_Galns	4.81552	-0.0977313	0.785559	-0.12441	0.900991	0.93684	0.0283345
ENSMUSG00000015053_Gata2	11.9565	-1.50514	0.630586	-2.38689	0.0169917	0.0724659	1.13987
ENSMUSG00000015083_C8g	1.38859	-0.0720787	0.827993	-0.0870523	0.93063	1	0
ENSMUSG00000015085_Entpd2	9.97781	-1.00093	0.702796	-1.42422	0.154384	0.28963	0.538156
ENSMUSG00000015087_Rabl6	282.254	0.497418	0.210667	2.36116	0.018218	0.0755614	1.1217
ENSMUSG00000015090_Ptgds	29.3305	1.19738	0.495597	2.41604	0.0156904	0.0688731	1.16195
ENSMUSG00000015092_Edf1	211.67	0.224233	0.321339	0.697808	0.485297	0.619127	0.20822
ENSMUSG00000015093_Clic3	1.76995	-0.943997	0.835026	-1.1305	0.258265	1	0
ENSMUSG00000015094_Npdc1	72.1035	0.664805	0.3271	2.03242	0.0421108	0.127105	0.895837
ENSMUSG00000015095_Fbxw5	39.144	0.427668	0.434958	0.983239	0.32549	0.473508	0.324673
ENSMUSG00000015112_Slc25a13	5.86003	-1.04487	0.76121	-1.37264	0.169865	0.30816	0.511224
ENSMUSG00000015120_Ube2i	84.8904	0.247134	0.32485	0.760764	0.446798	0.585548	0.232437
ENSMUSG00000015126_Tsr3	16.4368	0.136969	0.575114	0.238159	0.811757	0.874667	0.0581574
ENSMUSG00000015127_Unkl	40.0244	0.22578	0.434209	0.519981	0.603077	0.717654	0.144085
ENSMUSG00000015133_Lrrk1	15.4947	-0.87826	0.58469	-1.50209	0.133073	0.262574	0.580748
ENSMUSG00000015134_Aldh1a3	9.30685	-0.349295	0.703296	-0.496654	0.619433	0.730848	0.136173
ENSMUSG00000015143_Actn1	24.1886	0.402572	0.498841	0.807013	0.419659	0.560885	0.251126
ENSMUSG00000015149_Sirt2	74.293	0.334212	0.303249	1.1021	0.270416	0.419149	0.377632
ENSMUSG00000015165_Hnrnpl	211.128	0.344423	0.232728	1.47994	0.13889	0.270071	0.568522
ENSMUSG00000015176_Nolc1	117.627	0.0893021	0.281006	0.317794	0.750641	0.828735	0.0815843
ENSMUSG00000015189_Casd1	107.917	0.688502	0.275028	2.50339	0.0123011	0.0596342	1.2245
ENSMUSG00000015202_Cnksr3	57.392	0.476082	0.360311	1.32131	0.186398	0.327592	0.484667
ENSMUSG00000015214_Mtmr1	64.3653	0.822808	0.421275	1.95314	0.0508036	0.143202	0.844051
ENSMUSG00000015217_Hmgb3	51.6723	-0.0872079	0.378547	-0.230376	0.8178	0.87916	0.0559322
ENSMUSG00000015222_Map2	1343.13	0.610299	0.151305	4.03358	5.49e-05	0.00233276	2.63213
ENSMUSG00000015224_Cyp2j9	189.956	0.830463	0.262594	3.16254	0.001564	0.0173011	1.76193
ENSMUSG00000015243_Abca1	201.562	0.469588	0.250414	1.87524	0.060759	0.159896	0.796163
ENSMUSG00000015247_Nipsnap3b	2.15101	0.522455	0.832723	0.627405	0.530394	0.657965	0.181797
ENSMUSG00000015289_Lage3	8.78831	-0.341985	0.706265	-0.484217	0.628232	0.737421	0.132284
ENSMUSG00000015290_Ubl4a	43.735	0.982336	0.396257	2.47903	0.0131739	0.0623188	1.20538
ENSMUSG00000015291_Gdi1	515.126	0.680793	0.201134	3.38478	0.00071235	0.0107431	1.96887
ENSMUSG00000015305_Sash1	184.493	0.491518	0.229829	2.13862	0.0324663	0.108091	0.966209
ENSMUSG00000015312_Gadd45b	5.14403	-0.0875349	0.789488	-0.110876	0.911715	0.943849	0.0250973
ENSMUSG00000015314_Slamf6	31.038	-1.94552	0.508211	-3.82818	0.000129096	0.00388876	2.41019
ENSMUSG00000015316_Slamf1	17.0221	-1.58563	0.659278	-2.4051	0.0161679	0.0700166	1.1548
ENSMUSG00000015335_Zdhhc12	8.9243	-1.66084	0.743649	-2.23337	0.0255248	0.0933594	1.02984
ENSMUSG00000015337_Endog	6.05234	1.16404	0.79399	1.46606	0.142632	0.274905	0.560818
ENSMUSG00000015340_Cybb	5.00045	-0.506812	0.810732	-0.62513	0.531886	0.659341	0.18089
ENSMUSG00000015341_Golga7	78.8171	0.42044	0.305882	1.37452	0.169281	0.307577	0.512047
ENSMUSG00000015342_Xk	67.9002	0.72386	0.335532	2.15735	0.0309781	0.105143	0.978219
ENSMUSG00000015354_Pcolce2	8.7295	-0.934183	0.700853	-1.33292	0.182557	0.322861	0.490985
ENSMUSG00000015355_Cd48	1.11501	0.137899	0.770095	0.179068	0.857884	1	0
ENSMUSG00000015357_Clpx	81.7767	0.644101	0.318434	2.02272	0.0431022	0.129087	0.889118
ENSMUSG00000015363_Trabd	30.3945	0.100766	0.441058	0.228463	0.819286	0.880121	0.0554576
ENSMUSG00000015365_Mov10l1	2.64424	-1.83026	0.849168	-2.15535	0.0311343	0.10541	0.977118
ENSMUSG00000015377_Dennd6b	45.7655	-0.143784	0.388089	-0.370493	0.711015	0.800982	0.0963775
ENSMUSG00000015396_Cd83	6.83663	-0.441955	0.74134	-0.596157	0.55107	0.675626	0.170294
ENSMUSG00000015401_Tmem27	0.427184	-0.430788	0.604654	-0.712454	0.476184	1	0
ENSMUSG00000015405_Ace2	5.28705	-0.755829	0.788899	-0.95808	0.338022	0.485287	0.314002
ENSMUSG00000015437_Gzmb	2.99719	-0.801386	0.848116	-0.944902	0.344709	0.491824	0.308191
ENSMUSG00000015441_Gzmf	0.457789	-0.139322	0.605133	-0.230233	0.817911	1	0
ENSMUSG00000015443_Gzmn	1.3594	-1.33771	0.792693	-1.68755	0.0914975	1	0
ENSMUSG00000015451_C4a	3.06579	-1.69072	0.844791	-2.00135	0.045355	0.133359	0.874979
ENSMUSG00000015452_Ager	2.96236	-1.6006	0.848774	-1.88578	0.0593245	0.157636	0.802344
ENSMUSG00000015461_Atf6b	34.1746	-0.0367975	0.434491	-0.0846912	0.932507	0.957464	0.0188774
ENSMUSG00000015467_Egfl8	3.4564	-1.09234	0.843008	-1.29576	0.195057	0.337138	0.472192
ENSMUSG00000015468_Notch4	14.013	-1.75211	0.638928	-2.74227	0.00610167	0.0394143	1.40435
ENSMUSG00000015474_Ppt2	23.1618	0.191619	0.515264	0.371884	0.709979	0.800314	0.0967397
ENSMUSG00000015476_Prrt1	123.904	0.916918	0.307887	2.9781	0.00290042	0.0251607	1.59928
ENSMUSG00000015478_Rnf5	55.5369	0.064201	0.406929	0.15777	0.874638	0.919036	0.0366673
ENSMUSG00000015484_Fam163a	14.2375	-2.29553	0.645547	-3.55594	0.000376624	0.00732246	2.13534
ENSMUSG00000015488_Cacfd1	30.6965	0.212003	0.455582	0.465345	0.641685	0.748346	0.125898
ENSMUSG00000015501_Hivep2	397.169	0.51484	0.191219	2.69241	0.00709381	0.0429337	1.3672
ENSMUSG00000015519_2310057J18Rik	1.19571	-0.875009	0.798915	-1.09525	0.273409	1	0
ENSMUSG00000015522_Arnt	100.872	0.190034	0.297962	0.637779	0.523618	0.652129	0.185666
ENSMUSG00000015533_Itga2	2.96457	-1.1985	0.845513	-1.41748	0.156341	0.291787	0.534935
ENSMUSG00000015536_Mocs2	79.3996	0.0980263	0.297645	0.329339	0.741899	0.822391	0.0849217
ENSMUSG00000015542_Nat9	13.9237	-0.529941	0.625746	-0.846895	0.397054	0.540351	0.267324
ENSMUSG00000015568_Lpl	13.5035	-1.58108	0.635081	-2.48957	0.0127899	0.0612181	1.21312
ENSMUSG00000015575_Atp6v0e	40.9642	-0.0987962	0.389549	-0.253617	0.799791	0.866188	0.0623879
ENSMUSG00000015579_Nkx2-5	2.1353	-1.02596	0.833267	-1.23125	0.218228	0.363231	0.439817
ENSMUSG00000015597_Zfp318	186.24	0.229719	0.244706	0.938756	0.347856	0.494865	0.305514
ENSMUSG00000015599_Ttbk1	85.6356	0.0442817	0.321007	0.137946	0.890283	0.929573	0.0317163
ENSMUSG00000015605_Srf	23.3857	0.0620045	0.49915	0.12422	0.901141	0.936959	0.0282796
ENSMUSG00000015619_Gata3	5.18512	-1.80704	0.794712	-2.27383	0.0229763	0.0871734	1.05962
ENSMUSG00000015627_Gata5	5.94189	-1.46179	0.786368	-1.85892	0.0630386	0.163857	0.785535
ENSMUSG00000015647_Lama5	8.78101	1.17752	0.702784	1.6755	0.0938362	0.209672	0.67846
ENSMUSG00000015652_Steap1	1.96485	-1.79995	0.831566	-2.16453	0.0304236	1	0
ENSMUSG00000015653_Steap2	481.504	0.620616	0.197971	3.13488	0.00171924	0.0183653	1.736
ENSMUSG00000015656_Hspa8	4859.36	0.902384	0.171248	5.26946	1.37e-07	6.67e-05	4.17587
ENSMUSG00000015659_Serac1	43.8176	-0.174862	0.417123	-0.419209	0.675064	0.773303	0.11165
ENSMUSG00000015665_Awat1	0.801481	-0.511046	0.725684	-0.704226	0.481292	1	0
ENSMUSG00000015668_Pdzd11	35.4678	0.849533	0.427126	1.98895	0.0467065	0.135648	0.867588
ENSMUSG00000015671_Psma2	53.7071	0.947154	0.419841	2.25598	0.0240717	0.0898002	1.04672
ENSMUSG00000015672_Mrpl32	25.7611	0.439277	0.53125	0.826874	0.408309	0.550761	0.259037
ENSMUSG00000015697_Setdb1	80.3503	0.439172	0.314611	1.39592	0.162738	0.299653	0.523381
ENSMUSG00000015702_Anxa9	5.92184	-1.23265	0.765256	-1.61077	0.107229	0.227895	0.642265
ENSMUSG00000015709_Arnt2	100.557	0.421101	0.296744	1.41907	0.155879	0.291366	0.535561
ENSMUSG00000015711_Prune	29.8606	0.00971083	0.438225	0.0221595	0.982321	0.989333	0.00465752
ENSMUSG00000015714_Cers2	30.4408	-0.349458	0.432865	-0.807315	0.419485	0.56075	0.251231
ENSMUSG00000015721_Nlrp5	12.6997	-2.26013	0.745638	-3.03114	0.00243633	0.0226423	1.64508
ENSMUSG00000015733_Capza2	283.856	0.680562	0.208748	3.26021	0.00111331	0.0139944	1.85405
ENSMUSG00000015745_Plekho1	59.0599	0.4032	0.375968	1.07243	0.283527	0.433191	0.36332
ENSMUSG00000015747_Vps45	42.116	0.601657	0.421039	1.42898	0.15301	0.288066	0.540508
ENSMUSG00000015748_Prpf3	66.1193	-0.175112	0.316384	-0.553478	0.579936	0.700115	0.15483
ENSMUSG00000015749_Anp32e	215.538	-0.0206145	0.217174	-0.0949218	0.924377	0.952296	0.0212279
ENSMUSG00000015750_Aph1a	28.3105	-0.823936	0.469813	-1.75375	0.0794731	0.189134	0.72323
ENSMUSG00000015755_Tab2	141.74	0.584239	0.237994	2.45485	0.0140945	0.0644995	1.19044
ENSMUSG00000015757_Ppil4	132.285	0.439986	0.261113	1.68504	0.0919801	0.207246	0.683513
ENSMUSG00000015759_Cnih1	49.4285	0.650216	0.381891	1.70262	0.0886389	0.202117	0.694398
ENSMUSG00000015766_Eps8	235.236	0.576671	0.210661	2.73744	0.00619199	0.0398284	1.39981
ENSMUSG00000015776_Med22	30.5139	-0.193155	0.492627	-0.392091	0.694991	0.78912	0.102857
ENSMUSG00000015787_Abo	3.04429	-1.42869	0.847305	-1.68616	0.0917648	0.206815	0.684418
ENSMUSG00000015790_Surf1	30.6185	0.366108	0.46188	0.792648	0.427983	0.568391	0.245353
ENSMUSG00000015804_Med28	90.9531	0.436644	0.302831	1.44187	0.149339	0.283454	0.547517
ENSMUSG00000015806_Qdpr	56.0796	0.317283	0.385633	0.82276	0.410644	0.553132	0.257171
ENSMUSG00000015812_Gnrh1	0.580831	0.401827	0.644589	0.623385	0.533032	1	0
ENSMUSG00000015829_Tnr	298.387	0.472731	0.20573	2.29783	0.0215717	0.0836403	1.07758
ENSMUSG00000015837_Sqstm1	157.071	0.807817	0.258813	3.12123	0.00180097	0.0187799	1.72631
ENSMUSG00000015839_Nfe2l2	33.799	0.542629	0.434677	1.24835	0.211903	0.355626	0.449007
ENSMUSG00000015843_Rxrg	2.76572	-1.17053	0.849078	-1.37859	0.168021	0.306054	0.514202
ENSMUSG00000015846_Rxra	29.6483	-0.164805	0.46676	-0.353083	0.724026	0.809844	0.0915986
ENSMUSG00000015850_Adamtsl4	9.40757	-1.37756	0.707591	-1.94684	0.0515544	0.144489	0.840166
ENSMUSG00000015852_Fcrls	5.49692	-1.4563	0.776337	-1.87587	0.0606738	0.159799	0.796427
ENSMUSG00000015854_Cd5l	5.80591	-0.793111	0.795619	-0.996847	0.318839	0.466972	0.330709
ENSMUSG00000015869_Prpsap1	52.4614	0.456775	0.369738	1.2354	0.216681	0.361425	0.441982
ENSMUSG00000015879_Fam184b	98.8234	0.128683	0.286713	0.448823	0.653559	0.757406	0.120671
ENSMUSG00000015880_Ncapg	7.57365	-0.944722	0.724218	-1.30447	0.192073	0.333814	0.476496
ENSMUSG00000015882_Lcorl	76.0355	-0.134787	0.33536	-0.401918	0.687744	0.783877	0.105752
ENSMUSG00000015889_Lta4h	55.274	0.753834	0.361734	2.08394	0.0371652	0.117222	0.930992
ENSMUSG00000015890_Amdhd1	1.36536	-0.297212	0.813524	-0.365339	0.714858	1	0
ENSMUSG00000015932_Dstn	183.2	0.846759	0.252819	3.34928	0.000810233	0.0116657	1.93309
ENSMUSG00000015937_H2afy	141.486	0.141612	0.25572	0.553777	0.579731	0.699967	0.154923
ENSMUSG00000015942_Gtf2ird2	35.6272	-0.144776	0.415326	-0.348583	0.727402	0.812058	0.0904129
ENSMUSG00000015943_Bola1	15.2648	-0.19198	0.600762	-0.31956	0.749302	0.827823	0.0820626
ENSMUSG00000015944_Gatsl2	113.193	0.402609	0.297073	1.35525	0.175337	0.314246	0.50273
ENSMUSG00000015947_Fcgr1	5.40821	-0.284089	0.786694	-0.361118	0.718011	0.805599	0.093881
ENSMUSG00000015950_Ncf1	8.1349	-1.4697	0.724096	-2.02971	0.0423865	0.127535	0.894371
ENSMUSG00000015957_Wnt11	4.17925	-1.07688	0.844577	-1.27506	0.20229	0.345271	0.46184
ENSMUSG00000015961_Adss	131.242	0.660884	0.263351	2.50952	0.0120896	0.0589731	1.22935
ENSMUSG00000015966_Il17rb	9.87444	-0.864565	0.663621	-1.3028	0.192644	0.334467	0.475646
ENSMUSG00000015968_Cacna1d	108.583	0.508014	0.275888	1.84138	0.0655666	0.168076	0.774494
ENSMUSG00000015970_Chdh	16.4064	-0.929097	0.557977	-1.66512	0.0958894	0.212677	0.67228
ENSMUSG00000015971_Actr8	51.0489	0.641644	0.372615	1.722	0.0850689	0.196968	0.705604
ENSMUSG00000015980_Lrrc27	10.0971	-0.472049	0.674011	-0.700358	0.483704	0.618005	0.209008
ENSMUSG00000015981_Stk32c	3.97854	-1.51088	0.838853	-1.80113	0.0716823	0.177446	0.750933
ENSMUSG00000015994_Fnta	91.0579	0.396524	0.294356	1.34709	0.177952	0.317412	0.498377
ENSMUSG00000016018_Skiv2l2	156.433	0.860293	0.26193	3.28444	0.00102184	0.0134161	1.87237
ENSMUSG00000016024_Lbp	8.27178	-2.49909	0.780015	-3.20391	0.00135576	0.0158399	1.80025
ENSMUSG00000016028_Celsr1	8.66262	-1.17097	0.738141	-1.58638	0.112654	0.234849	0.629211
ENSMUSG00000016087_Fli1	6.81725	-1.4535	0.770062	-1.88751	0.0590916	0.157336	0.803172
ENSMUSG00000016128_Stard13	58.2475	0.0239845	0.33279	0.0720708	0.942546	0.964312	0.0157824
ENSMUSG00000016150_Tenm1	272.929	0.898339	0.255842	3.51131	0.000445908	0.00813933	2.08941
ENSMUSG00000016179_Camk1g	13.0144	-0.122575	0.610969	-0.200624	0.840993	0.896071	0.0476575
ENSMUSG00000016181_Diexf	35.6435	0.337073	0.415234	0.811767	0.416925	0.55859	0.252907
ENSMUSG00000016194_Hsd11b1	99.0709	0.762594	0.30017	2.54054	0.0110681	0.0560587	1.25136
ENSMUSG00000016200_Syt14	116.983	0.150704	0.284935	0.528908	0.596869	0.712764	0.147054
ENSMUSG00000016206_H2-M3	2.22037	-0.722605	0.84855	-0.851577	0.394449	0.538033	0.269191
ENSMUSG00000016239_Lonrf3	33.9919	0.0851324	0.420019	0.202687	0.83938	0.894795	0.0482763
ENSMUSG00000016252_Atp5e	30.4189	0.0745557	0.438164	0.170155	0.864888	0.911898	0.0400538
ENSMUSG00000016253_Nelfcd	29.2339	0.292364	0.455562	0.641767	0.521025	0.650239	0.186927
ENSMUSG00000016255_Tubb1	1.66716	-0.707933	0.828606	-0.854367	0.392902	1	0
ENSMUSG00000016256_Ctsz	20.4729	0.118025	0.523399	0.225497	0.821593	0.881659	0.0546996
ENSMUSG00000016257_Slmo2	39.9119	0.669354	0.401794	1.66591	0.0957305	0.212507	0.672627
ENSMUSG00000016262_Sertad4	17.3349	-0.613734	0.554951	-1.10593	0.268759	0.417589	0.379251
ENSMUSG00000016283_H2-M2	6.38732	-0.788114	0.769245	-1.02453	0.305586	0.45466	0.342313
ENSMUSG00000016308_Ube2a	34.2182	1.05774	0.449511	2.3531	0.0186178	0.0766827	1.1153
ENSMUSG00000016319_Slc25a5	156.505	0.97632	0.304034	3.21122	0.00132171	0.0156108	1.80657
ENSMUSG00000016327_Atp1b4	7.88347	-2.7712	0.764789	-3.62349	0.00029066	0.0062747	2.20241
ENSMUSG00000016344_Ppdpf	29.9586	1.19275	0.482812	2.47041	0.0134957	0.06317	1.19949
ENSMUSG00000016346_Kcnq2	211.928	-0.0355587	0.207571	-0.171309	0.863981	0.911164	0.0404033
ENSMUSG00000016349_Eef1a2	872.703	0.925868	0.175713	5.26921	1.37e-07	6.67e-05	4.17587
ENSMUSG00000016356_Col20a1	2.03165	-0.25919	0.847976	-0.305657	0.759866	0.835561	0.0780219
ENSMUSG00000016382_Pls3	294.973	0.920066	0.20684	4.4482	8.66e-06	0.000749049	3.12549
ENSMUSG00000016386_Mpped2	21.0661	0.248409	0.528723	0.469829	0.638478	0.745977	0.127274
ENSMUSG00000016409_Nkap	47.1317	0.542362	0.375974	1.44255	0.149147	0.28322	0.547877
ENSMUSG00000016427_Ndufa1	53.2993	0.891503	0.365165	2.44137	0.0146318	0.0659412	1.18084
ENSMUSG00000016458_Wt1	6.39578	-1.20286	0.788895	-1.52474	0.127323	0.254873	0.593676
ENSMUSG00000016477_E2f3	28.4688	-0.151166	0.454466	-0.332624	0.739418	0.820637	0.0858487
ENSMUSG00000016481_Cr1l	68.3314	-0.0934184	0.347462	-0.268859	0.788038	0.857266	0.0668844
ENSMUSG00000016487_Ppfibp1	38.729	-1.39498	0.446903	-3.12143	0.00179976	0.0187782	1.72634
ENSMUSG00000016493_Cd46	32.5853	-0.014684	0.459462	-0.031959	0.974505	0.984533	0.0067695
ENSMUSG00000016494_Cd34	35.6592	-2.0071	0.495828	-4.04798	5.17e-05	0.00224796	2.64821
ENSMUSG00000016495_Plgrkt	25.9065	0.22385	0.513541	0.435895	0.662913	0.764472	0.116639
ENSMUSG00000016496_Cd274	9.14917	-1.69692	0.720972	-2.35366	0.0185896	0.0766827	1.1153
ENSMUSG00000016498_Pdcd1lg2	4.2356	-0.93297	0.844244	-1.1051	0.269118	0.417972	0.378853
ENSMUSG00000016503_Gtf3a	14.598	0.303152	0.585933	0.517383	0.604889	0.719209	0.143145
ENSMUSG00000016510_Mtif3	42.7435	-0.0786244	0.404567	-0.194342	0.845908	0.899181	0.0461527
ENSMUSG00000016520_Lnx2	31.2308	0.395413	0.445159	0.888251	0.374406	0.519636	0.284301
ENSMUSG00000016524_Il19	0.356568	0.233822	0.608476	0.384274	0.700775	1	0
ENSMUSG00000016526_Dyrk3	18.0671	-0.255212	0.566851	-0.450227	0.652547	0.756694	0.12108
ENSMUSG00000016528_Mapkapk2	55.7331	0.66593	0.363427	1.83236	0.0668979	0.170087	0.769328
ENSMUSG00000016529_Il10	0.521349	0.0204257	0.620451	0.0329207	0.973738	1	0
ENSMUSG00000016534_Lamp2	157.428	0.509473	0.324087	1.57202	0.115945	0.239257	0.621135
ENSMUSG00000016541_Atxn10	176.929	0.763745	0.300839	2.53872	0.0111259	0.0561314	1.25079
ENSMUSG00000016552_Foxred2	32.8625	-0.455746	0.420065	-1.08494	0.277948	0.427162	0.369407
ENSMUSG00000016554_Eif3d	106.56	0.766082	0.30479	2.51348	0.0119547	0.0586839	1.23148
ENSMUSG00000016559_H3f3b	213.003	0.725528	0.222584	3.25957	0.0011158	0.0140112	1.85352
ENSMUSG00000016619_Nup50	99.6053	0.12767	0.277983	0.459274	0.646037	0.751624	0.123999
ENSMUSG00000016624_Phf21b	25.5261	-0.254697	0.467864	-0.544381	0.586179	0.704785	0.151943
ENSMUSG00000016626_Nlrp14	3.30761	-1.76228	0.846715	-2.08132	0.0374049	0.117732	0.929105
ENSMUSG00000016637_Ift27	39.7906	0.686944	0.397713	1.72723	0.0841258	0.195732	0.708337
ENSMUSG00000016664_Pacsin2	115.977	0.296849	0.290231	1.0228	0.306402	0.455203	0.341794
ENSMUSG00000016756_Cmah	26.3628	-1.83754	0.606036	-3.03207	0.00242886	0.0226066	1.64577
ENSMUSG00000016757_Ttll12	16.9634	0.322611	0.60329	0.534753	0.592821	0.709829	0.148846
ENSMUSG00000016758_Bik	1.40303	-0.630296	0.795829	-0.791999	0.428361	1	0
ENSMUSG00000016763_Scube1	16.7258	-1.34066	0.588567	-2.27783	0.0227367	0.0865328	1.06282
ENSMUSG00000016831_Tox4	78.848	0.417622	0.33406	1.25014	0.211248	0.354947	0.449837
ENSMUSG00000016833_Mrps18c	20.0137	0.848355	0.536878	1.58016	0.11407	0.236913	0.625412
ENSMUSG00000016918_Sulf1	106.361	0.219887	0.287541	0.764715	0.444442	0.583348	0.234072
ENSMUSG00000016921_Srsf6	120.415	0.53272	0.282607	1.88502	0.0594267	0.157718	0.802118
ENSMUSG00000016933_Plcg1	168.122	-0.0033536	0.235213	-0.0142577	0.988624	0.993047	0.00302999
ENSMUSG00000016940_Kctd2	75.2971	0.8471	0.330955	2.55956	0.0104805	0.0543474	1.26482
ENSMUSG00000016942_Tmprss6	1.11501	0.137899	0.770095	0.179068	0.857884	1	0
ENSMUSG00000016946_Kctd5	66.6607	0.125959	0.358218	0.351627	0.725118	0.81052	0.0912364
ENSMUSG00000016982_Pom121l2	7.64479	-1.16008	0.781282	-1.48484	0.137587	0.268585	0.570918
ENSMUSG00000016984_Etaa1	36.6245	0.49065	0.437681	1.12102	0.262279	0.411156	0.385994
ENSMUSG00000016995_Matn4	22.1819	-1.98424	0.588477	-3.37182	0.000746746	0.011087	1.95519
ENSMUSG00000016998_Svs4	0.828791	-0.459075	0.698506	-0.657224	0.511037	1	0
ENSMUSG00000017002_Slpi	0.68174	-0.583703	0.630822	-0.925306	0.354807	1	0
ENSMUSG00000017003_Svs3a	0.599811	-0.527023	0.609664	-0.864449	0.387341	1	0
ENSMUSG00000017004_Svs5	2.03706	-1.38333	0.841356	-1.64417	0.10014	0.217875	0.661792
ENSMUSG00000017007_Rbpjl	17.8068	-2.73322	0.624258	-4.37834	1.2e-05	0.000903519	3.04406
ENSMUSG00000017009_Sdc4	214.858	0.359596	0.218405	1.64647	0.0996678	0.217213	0.663114
ENSMUSG00000017049_Ccdc70	2.5278	-1.4415	0.848799	-1.69828	0.0894543	0.203383	0.691685
ENSMUSG00000017057_Il13ra1	4.05294	-1.05696	0.808641	-1.30708	0.191185	0.332886	0.477704
ENSMUSG00000017064_Prl5a1	2.42171	-1.84191	0.846928	-2.17481	0.0296444	0.102157	0.990732
ENSMUSG00000017119_Nbr1	352.554	0.735169	0.18776	3.91547	9.02e-05	0.00316524	2.49959
ENSMUSG00000017132_Cyth1	89.0445	-0.0966096	0.320123	-0.301789	0.762813	0.838021	0.0767452
ENSMUSG00000017144_Rnd3	11.5608	-0.622296	0.702834	-0.885411	0.375935	0.52117	0.283021
ENSMUSG00000017146_Brca1	29.6554	-1.25998	0.560856	-2.24653	0.0246698	0.0913322	1.03938
ENSMUSG00000017167_Cntnap1	109.53	0.864724	0.289586	2.98607	0.0028259	0.0247161	1.60702
ENSMUSG00000017176_Nt5c3b	38.6687	0.598397	0.428907	1.39517	0.162965	0.299916	0.523
ENSMUSG00000017188_Coa3	14.7514	1.06329	0.594379	1.7889	0.0736302	0.1804	0.743763
ENSMUSG00000017195_Zpbp2	2.14017	-0.671693	0.848046	-0.792048	0.428333	0.56868	0.245132
ENSMUSG00000017204_Gsdma	1.62289	-1.22136	0.83102	-1.46971	0.141641	1	0
ENSMUSG00000017210_Med24	54.8331	0.545811	0.362453	1.50588	0.132097	0.26143	0.582644
ENSMUSG00000017211_Gsdma2	5.34585	-1.85145	0.805722	-2.29788	0.0215686	0.0836403	1.07758
ENSMUSG00000017221_Psmd3	72.2981	0.586197	0.345496	1.69668	0.0897568	0.203802	0.690792
ENSMUSG00000017264_Exosc10	54.225	0.372573	0.347957	1.07075	0.284284	0.433799	0.362711
ENSMUSG00000017286_Glod4	49.0989	0.875085	0.366671	2.38657	0.0170064	0.0725061	1.13963
ENSMUSG00000017288_Vps53	76.9408	0.384312	0.313291	1.22669	0.219938	0.365181	0.437491
ENSMUSG00000017291_Taok1	904.96	0.676048	0.169045	3.99922	6.36e-05	0.00254692	2.59398
ENSMUSG00000017299_Dnttip1	17.4586	0.595456	0.589501	1.0101	0.312446	0.460936	0.33636
ENSMUSG00000017300_Tnnc2	0.43378	0.279139	0.609871	0.457702	0.647166	1	0
ENSMUSG00000017307_Acot8	9.1146	-0.520269	0.671411	-0.774888	0.438406	0.577789	0.23823
ENSMUSG00000017309_Cd300lg	9.52638	-1.19584	0.69698	-1.71574	0.0862088	0.198433	0.702386
ENSMUSG00000017311_Pyy	1.51383	-0.683923	0.802634	-0.852099	0.394159	1	0
ENSMUSG00000017314_Mpp2	29.1734	0.116088	0.467082	0.248539	0.803717	0.868609	0.0611756
ENSMUSG00000017344_Vtn	19.2663	0.389658	0.587103	0.663697	0.506884	0.638309	0.194969
ENSMUSG00000017376_Nlk	109.178	0.257505	0.301391	0.854387	0.39289	0.536608	0.270343
ENSMUSG00000017386_Traf4	31.083	0.0140635	0.432385	0.0325254	0.974053	0.984421	0.00681915
ENSMUSG00000017390_Aldoc	3085.16	1.04628	0.20806	5.02874	4.94e-07	0.000132784	3.87685
ENSMUSG00000017400_Stac2	23.0349	0.214794	0.525532	0.408718	0.682747	0.779509	0.108179
ENSMUSG00000017404_Rpl19	191.26	0.643818	0.235238	2.73688	0.0062025	0.0398703	1.39935
ENSMUSG00000017405_Nek8	9.68895	0.333273	0.683182	0.487825	0.625674	0.735757	0.133266
ENSMUSG00000017412_Cacnb4	681.024	0.792643	0.197559	4.01218	6.02e-05	0.00246164	2.60878
ENSMUSG00000017417_Plxdc1	117.221	0.954733	0.306958	3.1103	0.00186897	0.0192558	1.71544
ENSMUSG00000017418_Arl5b	56.1628	-0.0582576	0.339721	-0.171486	0.863841	0.911129	0.0404203
ENSMUSG00000017421_Zfp207	308.592	0.69763	0.246769	2.82705	0.00469784	0.033913	1.46963
ENSMUSG00000017428_Psmd11	102.793	0.3169	0.278144	1.13934	0.254561	0.40337	0.394296
ENSMUSG00000017446_C1qtnf1	10.7776	-3.5152	0.771021	-4.55915	5.14e-06	0.000533488	3.27288
ENSMUSG00000017453_Pipox	5.80866	-0.265963	0.750117	-0.354562	0.722918	0.808849	0.0921324
ENSMUSG00000017466_Timp2	26.8912	-0.603639	0.496806	-1.21504	0.22435	0.369962	0.431842
ENSMUSG00000017478_Zc3h18	116.173	-0.392289	0.315732	-1.24248	0.214061	0.358281	0.445776
ENSMUSG00000017485_Top2b	581.194	0.652753	0.1691	3.86015	0.000113318	0.00360316	2.44332
ENSMUSG00000017491_Rarb	20.1387	0.797408	0.525463	1.51753	0.129132	0.257417	0.589363
ENSMUSG00000017493_Igfbp4	12.8352	-1.58017	0.641549	-2.46305	0.0137759	0.0638334	1.19495
ENSMUSG00000017499_Cdc6	9.90335	-1.80516	0.736745	-2.45018	0.0142785	0.0650242	1.18692
ENSMUSG00000017548_Suz12	121.794	0.730493	0.289745	2.52116	0.0116968	0.0578655	1.23758
ENSMUSG00000017550_Atad5	39.0257	0.276357	0.400322	0.690336	0.489983	0.623227	0.205354
ENSMUSG00000017561_Crlf3	47.8437	0.33098	0.367173	0.90143	0.36736	0.513167	0.289742
ENSMUSG00000017588_Krt27	2.57441	-1.66547	0.848819	-1.9621	0.0497504	0.141232	0.850067
ENSMUSG00000017607_Tns4	10.112	-1.98122	0.6865	-2.88597	0.00390208	0.0304742	1.51607
ENSMUSG00000017615_Tnfaip1	39.8634	0.107187	0.410381	0.26119	0.793946	0.86166	0.0646639
ENSMUSG00000017631_Abr	413.98	0.70284	0.218116	3.22233	0.00127154	0.0152202	1.81758
ENSMUSG00000017639_Rab11fip4	532.406	0.406275	0.180403	2.25205	0.0243194	0.0904676	1.04351
ENSMUSG00000017652_Cd40	8.89634	-2.82292	0.74327	-3.79798	0.00014588	0.00420563	2.37617
ENSMUSG00000017664_Slc35c2	38.8569	-0.515642	0.411966	-1.25166	0.210693	0.354482	0.450405
ENSMUSG00000017667_Zfp334	65.6481	-0.119371	0.326445	-0.365669	0.714612	0.803491	0.095019
ENSMUSG00000017670_Elmo2	268.895	0.845912	0.214214	3.94892	7.85e-05	0.00291646	2.53514
ENSMUSG00000017677_Wsb1	73.3254	0.571455	0.330775	1.72762	0.0840556	0.195617	0.708594
ENSMUSG00000017679_Ttpal	67.0603	0.259904	0.325888	0.797525	0.425146	0.565729	0.247391
ENSMUSG00000017686_Rhot1	128.068	0.792788	0.254198	3.11878	0.00181603	0.0188684	1.72426
ENSMUSG00000017688_Hnf4g	2.03469	-1.66119	0.841841	-1.97328	0.0484635	0.139015	0.856937
ENSMUSG00000017692_Rhbdl3	20.0514	-1.0669	0.549055	-1.94316	0.0519971	0.145076	0.838405
ENSMUSG00000017697_Ada	2.03416	-0.848826	0.838849	-1.01189	0.311589	0.460156	0.337095
ENSMUSG00000017707_Serinc3	158.471	0.847695	0.262506	3.22924	0.00124119	0.0150099	1.82362
ENSMUSG00000017713_Tha1	9.93536	-1.59672	0.699744	-2.28187	0.0224973	0.0860278	1.06536
ENSMUSG00000017715_Pgs1	31.3359	0.172261	0.443068	0.388791	0.697431	0.791028	0.101808
ENSMUSG00000017716_Birc5	11.712	-1.62746	0.681544	-2.3879	0.0169449	0.0723139	1.14078
ENSMUSG00000017718_Afmid	4.47445	-1.89693	0.833478	-2.27593	0.0228505	0.0868685	1.06114
ENSMUSG00000017720_Trp53tg5	2.21941	-1.97601	0.839777	-2.35301	0.018622	0.0766827	1.1153
ENSMUSG00000017721_Pigt	114.546	0.756527	0.293432	2.5782	0.0099317	0.0527084	1.27812
ENSMUSG00000017724_Etv4	20.8976	0.441797	0.56635	0.780078	0.435345	0.574857	0.24044
ENSMUSG00000017734_Dbndd2	244.333	0.464673	0.225531	2.06035	0.039365	0.121706	0.914689
ENSMUSG00000017737_Mmp9	5.36185	-1.32526	0.781144	-1.69656	0.0897801	0.203815	0.690763
ENSMUSG00000017740_Slc12a5	994.353	0.559741	0.170789	3.27738	0.00104776	0.01356	1.86774
ENSMUSG00000017747_Ghdc	15.6693	-0.674099	0.562115	-1.19922	0.230442	0.376673	0.424036
ENSMUSG00000017754_Pltp	60.1569	1.07392	0.364452	2.94666	0.00321224	0.0268649	1.57081
ENSMUSG00000017756_Slc12a7	10.3403	-2.46918	0.70205	-3.5171	0.000436291	0.00801706	2.09598
ENSMUSG00000017760_Ctsa	61.8581	0.345692	0.344993	1.00203	0.31633	0.464792	0.332741
ENSMUSG00000017764_Zswim1	19.9205	-0.0725367	0.516598	-0.140412	0.888334	0.928278	0.0323218
ENSMUSG00000017765_Slc12a4	49.7135	0.861325	0.377409	2.28221	0.022477	0.0860002	1.0655
ENSMUSG00000017767_Spata25	1.78658	-1.69471	0.825395	-2.05321	0.0400524	1	0
ENSMUSG00000017774_Myo1c	17.1952	0.185868	0.552158	0.336621	0.736403	0.81851	0.0869758
ENSMUSG00000017776_Crk	153.881	0.661135	0.26743	2.47217	0.0134294	0.0629737	1.20084
ENSMUSG00000017778_Cox7c	112.678	0.727756	0.279915	2.59992	0.00932458	0.050843	1.29377
ENSMUSG00000017781_Pitpna	299.404	0.564021	0.193845	2.90965	0.00361836	0.0289503	1.53835
ENSMUSG00000017801_Mlx	21.0575	0.36608	0.520953	0.702712	0.482235	0.616774	0.209874
ENSMUSG00000017802_Fam134c	52.6442	0.489335	0.388309	1.26017	0.207608	0.350928	0.454782
ENSMUSG00000017817_Jph2	4.42849	-1.64728	0.823536	-2.00025	0.0454729	0.133492	0.874544
ENSMUSG00000017830_Dhx58	7.6368	-0.89128	0.736107	-1.2108	0.225972	0.371803	0.429687
ENSMUSG00000017831_Rab5a	199.302	0.254414	0.238085	1.06859	0.285256	0.434719	0.361791
ENSMUSG00000017837_Nkiras2	33.7425	0.0617083	0.451876	0.13656	0.891379	0.930292	0.0313806
ENSMUSG00000017843_Ppp2r5c	108.301	0.894777	0.286653	3.12146	0.00179957	0.0187782	1.72634
ENSMUSG00000017858_Ift52	37.1526	0.36325	0.415785	0.873648	0.38231	0.526924	0.278252
ENSMUSG00000017861_Mybl2	13.7723	-1.85777	0.680825	-2.72871	0.00635833	0.0403951	1.39367
ENSMUSG00000017868_Sgk2	4.41058	-1.14433	0.844013	-1.35582	0.175158	0.314055	0.502994
ENSMUSG00000017897_Eya2	4.45084	-0.913498	0.809162	-1.12894	0.258922	0.407902	0.389444
ENSMUSG00000017929_B4galt5	60.0722	0.587942	0.370257	1.58793	0.112302	0.234419	0.630008
ENSMUSG00000017943_Gdap1l1	55.2098	0.0861461	0.344929	0.24975	0.802781	0.86805	0.0614554
ENSMUSG00000017950_Hnf4a	10.4574	-1.74247	0.765004	-2.27772	0.0227431	0.0865445	1.06276
ENSMUSG00000017969_Ptgis	2.81874	-0.964264	0.848995	-1.13577	0.256053	0.404988	0.392558
ENSMUSG00000017978_Cadps2	273.836	0.825684	0.232731	3.5478	0.000388457	0.00742382	2.12937
ENSMUSG00000017999_Ddx27	79.7751	0.213701	0.31766	0.672733	0.501117	0.63326	0.198418
ENSMUSG00000018001_Cyth3	305.81	0.615058	0.217021	2.8341	0.00459551	0.033489	1.4751
ENSMUSG00000018008_Cyth4	4.62624	-0.272838	0.80182	-0.340273	0.733651	0.816541	0.0880217
ENSMUSG00000018012_Rac3	7.86189	-0.162819	0.71502	-0.227712	0.81987	0.880478	0.0552816
ENSMUSG00000018040_Rrp7a	47.2489	0.0403316	0.401794	0.100379	0.920044	0.949348	0.0225744
ENSMUSG00000018042_Cyb5r3	83.3892	-0.364005	0.32133	-1.13281	0.257296	0.406207	0.391252
ENSMUSG00000018068_Ints2	59.8019	0.18203	0.336992	0.540162	0.589085	0.707108	0.150514
ENSMUSG00000018076_Med13l	156.07	0.079356	0.239434	0.331431	0.740319	0.821307	0.0854943
ENSMUSG00000018102_Hist1h2bc	57.1015	0.399034	0.36609	1.08999	0.275719	0.424565	0.372055
ENSMUSG00000018126_Baiap2l2	1.41966	-1.40123	0.799855	-1.75185	0.0797998	1	0
ENSMUSG00000018143_Mafk	10.8686	-1.70047	0.684091	-2.48574	0.0129283	0.0615857	1.21052
ENSMUSG00000018160_Med1	146.836	0.0571279	0.237075	0.240969	0.809579	0.872866	0.0590525
ENSMUSG00000018166_Erbb3	7.32387	-1.2259	0.744455	-1.64671	0.0996172	0.217151	0.663238
ENSMUSG00000018167_Stard3	15.0243	0.0236043	0.585936	0.0402847	0.967866	0.980897	0.00837677
ENSMUSG00000018168_Ikzf3	29.4582	-2.37322	0.541477	-4.38287	1.17e-05	0.000892057	3.04961
ENSMUSG00000018169_Mfng	3.23551	-1.30621	0.843337	-1.54886	0.121415	0.246812	0.607634
ENSMUSG00000018171_Vmp1	136.448	0.452049	0.257379	1.75635	0.0790283	0.188422	0.724868
ENSMUSG00000018189_Uchl5	91.3202	0.362317	0.301631	1.20119	0.229677	0.375849	0.424987
ENSMUSG00000018196_Glrx2	93.5984	0.105497	0.277893	0.379633	0.704218	0.79643	0.0988526
ENSMUSG00000018199_Trove2	361.101	0.664958	0.243513	2.73069	0.00632016	0.0402616	1.39511
ENSMUSG00000018209_Stk4	107.859	0.0169288	0.267673	0.0632442	0.949572	0.968822	0.0137562
ENSMUSG00000018217_Pmp22	27.0946	0.627037	0.466821	1.34321	0.179205	0.31889	0.496359
ENSMUSG00000018238_Gdf9	8.31667	-1.76434	0.730361	-2.4157	0.0157048	0.0689122	1.1617
ENSMUSG00000018239_Zcchc10	14.5589	0.320766	0.61082	0.525141	0.599485	0.714963	0.145716
ENSMUSG00000018263_Tbx5	14.6528	-1.7058	0.698292	-2.44283	0.0145728	0.0657674	1.18199
ENSMUSG00000018286_Psmb6	60.6723	0.462159	0.349889	1.32087	0.186544	0.327735	0.484478
ENSMUSG00000018287_Spag7	129.384	0.731463	0.252586	2.89589	0.00378084	0.0298997	1.52433
ENSMUSG00000018293_Pfn1	62.6418	0.724884	0.356329	2.03431	0.04192	0.126684	0.89728
ENSMUSG00000018322_Tomm34	36.9507	1.05003	0.413207	2.54118	0.0110479	0.056037	1.25152
ENSMUSG00000018326_Ywhab	300.317	0.698869	0.244428	2.8592	0.00424714	0.0319916	1.49496
ENSMUSG00000018334_Ksr1	38.0292	-0.301126	0.445547	-0.675857	0.499132	0.631317	0.199752
ENSMUSG00000018339_Gpx3	4.16592	-1.49333	0.822057	-1.81658	0.0692812	0.173735	0.760114
ENSMUSG00000018340_Anxa6	117.067	0.925299	0.274118	3.37554	0.0007367	0.0109757	1.95957
ENSMUSG00000018341_Il12rb2	2.34088	-1.27141	0.846671	-1.50165	0.133187	0.262574	0.580748
ENSMUSG00000018347_Zkscan6	11.6283	-0.211048	0.616804	-0.342164	0.732227	0.815499	0.0885763
ENSMUSG00000018362_Kpna2	25.5561	0.326145	0.516979	0.630867	0.528128	0.655974	0.183114
ENSMUSG00000018363_Smurf2	53.5372	0.450754	0.392843	1.14742	0.25121	0.399728	0.398236
ENSMUSG00000018372_Cep95	37.1901	-0.217388	0.416049	-0.522505	0.601319	0.716515	0.144774
ENSMUSG00000018377_Vezf1	106.23	0.521732	0.282464	1.84707	0.0647369	0.166994	0.777299
ENSMUSG00000018378_Cuedc1	30.1252	0.039499	0.460645	0.0857472	0.931667	0.956937	0.0191165
ENSMUSG00000018379_Srsf1	286.349	0.619124	0.23842	2.59678	0.00941033	0.0510431	1.29206
ENSMUSG00000018381_Abi3	11.6394	-2.0211	0.745318	-2.71172	0.00669343	0.0414989	1.38196
ENSMUSG00000018387_Shroom1	9.87507	-1.42391	0.662993	-2.14769	0.0317381	0.106876	0.971119
ENSMUSG00000018395_Kif3a	449.012	0.235554	0.177333	1.32832	0.184074	0.324632	0.488609
ENSMUSG00000018398_Sept8	523.93	0.463245	0.185255	2.50058	0.0123992	0.0599053	1.22253
ENSMUSG00000018401_Mtmr4	163.081	0.557328	0.247016	2.25625	0.0240552	0.0897775	1.04683
ENSMUSG00000018405_Mrm1	11.0227	0.29282	0.667924	0.438404	0.661093	0.763056	0.117444
ENSMUSG00000018411_Mapt	383.988	0.563289	0.198046	2.84423	0.00445189	0.0327809	1.48438
ENSMUSG00000018412_Kansl1	144.669	0.617239	0.267854	2.30439	0.0212009	0.0827067	1.08246
ENSMUSG00000018415_Gid4	57.9061	0.024249	0.345069	0.0702729	0.943976	0.965325	0.0153264
ENSMUSG00000018417_Myo1b	80.8038	0.341195	0.29383	1.1612	0.24556	0.393792	0.404733
ENSMUSG00000018425_Dhx40	70.1958	0.0066805	0.326222	0.0204784	0.983662	0.990109	0.00431705
ENSMUSG00000018427_Ypel2	37.1578	-0.0299491	0.402115	-0.074479	0.940629	0.963237	0.0162666
ENSMUSG00000018428_Akap1	82.3001	0.128911	0.31544	0.408672	0.682781	0.779509	0.108179
ENSMUSG00000018433_Nol11	73.9403	0.709438	0.346399	2.04804	0.0405561	0.124022	0.906501
ENSMUSG00000018442_Derl2	58.6707	-0.59872	0.332536	-1.80046	0.0717873	0.177587	0.750589
ENSMUSG00000018446_C1qbp	41.0982	0.285546	0.433288	0.659022	0.509882	0.640788	0.193286
ENSMUSG00000018449_Rpain	8.86708	0.0177075	0.694509	0.0254965	0.979659	0.987731	0.00536132
ENSMUSG00000018451_6330403K07Rik	15.8149	0.416206	0.595915	0.698431	0.484908	0.618905	0.208376
ENSMUSG00000018459_Slc13a3	26.0615	0.0028255	0.481148	0.00587241	0.995315	0.997014	0.00129892
ENSMUSG00000018470_Kcnab3	56.0226	0.524607	0.398266	1.31723	0.187763	0.329132	0.48263
ENSMUSG00000018474_Chd3	323.266	0.183598	0.22662	0.810158	0.417849	0.559277	0.252373
ENSMUSG00000018476_Kdm6b	72.7056	-0.0498201	0.325322	-0.153141	0.878287	0.921584	0.0354651
ENSMUSG00000018479_1700125H20Rik	0.848722	-0.788117	0.696982	-1.13076	0.258158	1	0
ENSMUSG00000018481_Appbp2	180.475	0.619595	0.245192	2.52698	0.0115047	0.0572994	1.24185
ENSMUSG00000018486_Wnt9b	18.2922	-1.7582	0.603087	-2.91534	0.00355298	0.0286491	1.54289
ENSMUSG00000018500_Adora2b	5.96392	-0.716399	0.781199	-0.91705	0.359116	0.505325	0.296429
ENSMUSG00000018501_Ncor1	781.046	0.544572	0.18077	3.01251	0.00259098	0.0234231	1.63036
ENSMUSG00000018507_Trpv2	19.0018	-1.21313	0.574986	-2.10984	0.0348725	0.112767	0.947819
ENSMUSG00000018509_Cenpv	5.6612	0.365631	0.776511	0.470864	0.637738	0.745259	0.127693
ENSMUSG00000018537_Pcgf2	18.0045	-0.667338	0.546066	-1.22208	0.221676	0.367187	0.435112
ENSMUSG00000018541_Cwc25	41.5684	-0.171072	0.411932	-0.415292	0.677928	0.775708	0.110302
ENSMUSG00000018547_Pip4k2b	93.2859	0.213504	0.289925	0.736413	0.46148	0.598651	0.222827
ENSMUSG00000018548_Trim37	602.038	0.679226	0.182303	3.72582	0.000194685	0.00491356	2.3086
ENSMUSG00000018554_Ybx2	4.03677	-0.767251	0.83383	-0.920153	0.357493	0.503772	0.297766
ENSMUSG00000018559_Ctdnep1	18.7991	0.107267	0.523773	0.204796	0.837731	0.893581	0.0488662
ENSMUSG00000018565_Elp5	40.7481	-0.0129	0.394645	-0.0326877	0.973924	0.984389	0.00683312
ENSMUSG00000018566_Slc2a4	12.8698	-1.19232	0.671143	-1.77655	0.0756416	0.183431	0.736527
ENSMUSG00000018567_Gabarap	75.5411	0.781501	0.338125	2.31128	0.0208174	0.0817094	1.08773
ENSMUSG00000018569_Cldn7	2.2836	-1.83257	0.84716	-2.16319	0.0305267	0.104035	0.982821
ENSMUSG00000018570_2810408A11Rik	4.31204	-1.56245	0.831222	-1.8797	0.060149	0.158955	0.798726
ENSMUSG00000018572_Phf23	65.3549	0.012963	0.375889	0.0344862	0.972489	0.983614	0.00717546
ENSMUSG00000018574_Acadvl	46.6664	0.443575	0.384561	1.15346	0.248723	0.397289	0.400894
ENSMUSG00000018581_Dnah11	71.099	0.0476269	0.337013	0.141321	0.887617	0.927876	0.0325101
ENSMUSG00000018583_G3bp1	97.4709	0.351994	0.303224	1.16084	0.245708	0.39392	0.404592
ENSMUSG00000018585_Atox1	17.8334	1.52313	0.592534	2.57053	0.0101544	0.0534945	1.27169
ENSMUSG00000018589_Glra2	2.03165	-0.0927826	0.848205	-0.109387	0.912896	0.944612	0.0247464
ENSMUSG00000018593_Sparc	518.049	0.621922	0.198454	3.13384	0.00172537	0.0183909	1.7354
ENSMUSG00000018595_Glra4	3.35486	-1.85978	0.83903	-2.21658	0.0266519	0.0957778	1.01874
ENSMUSG00000018599_Mief2	14.325	-0.00425274	0.576684	-0.00737448	0.994116	0.99625	0.00163154
ENSMUSG00000018604_Tbx3	16.0191	-1.53165	0.602328	-2.54289	0.0109941	0.0558773	1.25276
ENSMUSG00000018620_Mmp20	3.84197	-0.679474	0.816679	-0.831996	0.405411	0.548619	0.260729
ENSMUSG00000018623_Mmp7	0.68174	-0.583703	0.630822	-0.925306	0.354807	1	0
ENSMUSG00000018634_Crhr1	24.5862	1.02045	0.531547	1.91977	0.0548873	0.149921	0.824138
ENSMUSG00000018648_Dusp14	15.0637	-0.544998	0.571053	-0.954373	0.339895	0.487028	0.312446
ENSMUSG00000018651_Tada2a	30.7937	0.444401	0.462705	0.960441	0.336833	0.484226	0.314952
ENSMUSG00000018654_Ikzf1	8.67122	-1.09645	0.725984	-1.5103	0.130967	0.259911	0.585175
ENSMUSG00000018656_Tcaf3	7.03241	-1.55398	0.789338	-1.96872	0.0489857	0.139907	0.85416
ENSMUSG00000018659_Pnpo	34.2945	0.145167	0.434998	0.333719	0.738591	0.81999	0.0861914
ENSMUSG00000018661_Cog1	56.6006	0.645008	0.365011	1.76709	0.0772132	0.185742	0.73109
ENSMUSG00000018666_Cbx1	145.656	0.2737	0.280563	0.975539	0.329293	0.476918	0.321556
ENSMUSG00000018669_Cdk5rap3	21.4582	0.0119376	0.49929	0.0239092	0.980925	0.98839	0.0050717
ENSMUSG00000018672_Copz2	7.12532	-0.75708	0.776157	-0.975421	0.329351	0.476976	0.321504
ENSMUSG00000018677_Slc25a39	26.4431	1.06539	0.477233	2.23243	0.0255865	0.0935059	1.02916
ENSMUSG00000018678_Sp2	26.85	-0.362088	0.466589	-0.776031	0.43773	0.57718	0.238689
ENSMUSG00000018697_Aatf	157.583	0.0313392	0.274975	0.113971	0.909261	0.942176	0.0258679
ENSMUSG00000018698_Lhx1	100.77	0.569492	0.278544	2.04453	0.0409011	0.124678	0.904209
ENSMUSG00000018707_Dync1h1	1250.66	0.853332	0.165828	5.14588	2.66e-07	9.43e-05	4.02549
ENSMUSG00000018727_Cpsf4l	10.1483	-0.530174	0.65348	-0.811309	0.417188	0.558858	0.252698
ENSMUSG00000018733_Pex12	22.4071	-0.950054	0.519123	-1.83011	0.067233	0.170536	0.768183
ENSMUSG00000018736_Ndel1	119.843	0.598163	0.278574	2.14723	0.0317748	0.106914	0.970967
ENSMUSG00000018740_Slc25a35	30.9338	-1.23284	0.476829	-2.5855	0.00972386	0.0519794	1.28417
ENSMUSG00000018750_Zbtb4	247.421	0.321066	0.200184	1.60386	0.108746	0.229839	0.638577
ENSMUSG00000018752_Tnfsfm13	2.94394	-0.0178933	0.847738	-0.0211072	0.98316	0.989831	0.00443901
ENSMUSG00000018761_Mpdu1	24.4703	0.00138878	0.474841	0.00292472	0.997666	0.998517	0.000644434
ENSMUSG00000018765_Fxr2	138.811	0.700764	0.256715	2.72974	0.00633841	0.0403463	1.3942
ENSMUSG00000018770_Atp5g3	90.5314	0.755854	0.337593	2.23895	0.0251591	0.092505	1.03383
ENSMUSG00000018774_Cd68	3.25068	0.154368	0.832494	0.185429	0.852893	0.903648	0.0440005
ENSMUSG00000018776_Slc35g3	9.08356	-2.43211	0.735232	-3.30794	0.00093984	0.0127857	1.89327
ENSMUSG00000018796_Acsl1	58.1258	-0.452817	0.332618	-1.36137	0.173396	0.312241	0.50551
ENSMUSG00000018800_Abca5	153.359	0.69173	0.275526	2.51058	0.0120534	0.0588937	1.22993
ENSMUSG00000018809_Smyd4	25.9733	-0.35014	0.520746	-0.672383	0.50134	0.633459	0.198282
ENSMUSG00000018819_Lsp1	16.8473	-2.5219	0.680861	-3.70398	0.000212241	0.00512616	2.29021
ENSMUSG00000018820_Zfyve27	80.9125	-0.0467803	0.300091	-0.155887	0.876122	0.919941	0.0362398
ENSMUSG00000018821_Avpi1	5.73175	0.787379	0.774375	1.01679	0.309252	0.457938	0.339194
ENSMUSG00000018822_Sfrp5	1.45183	-0.794586	0.833631	-0.953162	0.340508	1	0
ENSMUSG00000018830_Myh11	13.4711	-0.60387	0.600409	-1.00576	0.314529	0.463069	0.334355
ENSMUSG00000018841_Rad51d	21.7345	0.256163	0.500464	0.511852	0.608754	0.722242	0.141317
ENSMUSG00000018844_Fndc8	4.83143	-0.545213	0.796226	-0.684747	0.493503	0.626369	0.20317
ENSMUSG00000018845_Unc45b	7.00175	-1.91037	0.775912	-2.46209	0.0138128	0.0639611	1.19408
ENSMUSG00000018846_Pank3	156.324	0.561444	0.262725	2.137	0.032598	0.108181	0.965849
ENSMUSG00000018848_Rars	68.5086	0.162874	0.317175	0.513513	0.607592	0.721327	0.141868
ENSMUSG00000018849_Wwc1	60.7763	0.0869597	0.36453	0.238553	0.811452	0.874411	0.0582844
ENSMUSG00000018858_Ict1	45.1653	0.0444115	0.382946	0.115973	0.907674	0.941174	0.0263301
ENSMUSG00000018861_Fdxr	19.7341	-0.253071	0.51889	-0.487717	0.625751	0.735813	0.133232
ENSMUSG00000018862_Otop3	2.0245	-1.07612	0.84052	-1.28031	0.200437	0.34329	0.464339
ENSMUSG00000018865_Sult4a1	117.981	0.445362	0.270204	1.64824	0.0993034	0.216889	0.663763
ENSMUSG00000018868_Pnpla5	0.721286	-0.155386	0.705842	-0.220143	0.82576	1	0
ENSMUSG00000018882_Mrpl45	71.6129	0.370303	0.307861	1.20283	0.229044	0.375257	0.425671
ENSMUSG00000018893_Mb	1.88639	-1.02232	0.838452	-1.21929	0.222733	1	0
ENSMUSG00000018899_Irf1	8.89621	-1.70265	0.725314	-2.34746	0.0189018	0.0772539	1.11208
ENSMUSG00000018900_Slc22a5	9.27398	-1.31983	0.690448	-1.91155	0.055934	0.151841	0.818611
ENSMUSG00000018906_P4ha2	36.6428	-0.628572	0.417529	-1.50545	0.132207	0.261608	0.58235
ENSMUSG00000018907_Alox12e	5.63863	-2.42823	0.810011	-2.99777	0.00271962	0.0241645	1.61682
ENSMUSG00000018909_Arrb1	288.063	0.431521	0.202213	2.13399	0.0328439	0.108531	0.964447
ENSMUSG00000018914_Il3	0.854367	-0.846161	0.707658	-1.19572	0.231806	1	0
ENSMUSG00000018916_Csf2	0.574235	-0.319799	0.673232	-0.475021	0.634772	1	0
ENSMUSG00000018919_Tm4sf5	0.828791	-0.459075	0.698506	-0.657224	0.511037	1	0
ENSMUSG00000018920_Cxcl16	6.50081	-0.353249	0.780219	-0.452756	0.650724	0.755307	0.121876
ENSMUSG00000018921_Pelp1	63.8483	-0.362188	0.330961	-1.09435	0.2738	0.422524	0.374148
ENSMUSG00000018923_Med11	7.73274	-1.0292	0.725025	-1.41954	0.155742	0.291173	0.535849
ENSMUSG00000018924_Alox15	0.346988	-0.139322	0.605133	-0.230233	0.817911	1	0
ENSMUSG00000018925_Heatr9	1.24295	-0.934874	0.72787	-1.2844	0.199003	1	0
ENSMUSG00000018927_Ccl6	2.22103	-1.30436	0.848871	-1.53658	0.124397	0.25098	0.60036
ENSMUSG00000018931_Natd1	25.1904	-0.840351	0.500262	-1.67982	0.0929922	0.208598	0.68069
ENSMUSG00000018932_Map2k3	6.92679	0.188977	0.744217	0.253928	0.799551	0.866069	0.0624477
ENSMUSG00000018965_Ywhah	4513.76	0.419732	0.363749	1.1539	0.24854	0.397113	0.401086
ENSMUSG00000018973_Hoxb1	10.3291	-2.62555	0.744673	-3.52578	0.000422239	0.00784866	2.1052
ENSMUSG00000018974_Sart3	94.2433	-0.299863	0.292871	-1.02387	0.305895	0.454792	0.342187
[truncated: 32,542 more rows]

## Sheet: TPM
Gene	KO1-ssv2	KO2-ssv2	KO3-ssv2	KO_median	WT1-ssv2	WT2-ssv2	WT3-ssv2	WT_median
ENSMUSG00000000001_Gnai3	13.32	14.5	11.67	13.32	13.18	12.56	8.09	12.56
ENSMUSG00000000003_Pbsn	0	0	0	0	0	0	0	0
ENSMUSG00000000028_Cdc45	0.96	2.04	3.53	2.04	4.58	1.68	6.44	4.58
ENSMUSG00000000031_H19	0.77	0.8	2.41	0.8	2.36	6.74	16.54	6.74
ENSMUSG00000000037_Scml2	0	0.32	0	0	0	0.99	0	0
ENSMUSG00000000049_Apoh	0	0	0	0	4.22	6.95	1.46	4.22
ENSMUSG00000000056_Narf	19.39	18.83	31.58	19.39	21.97	26.74	18.14	21.97
ENSMUSG00000000058_Cav2	1.47	4.68	4.16	4.16	6.26	10.23	16.42	10.23
ENSMUSG00000000078_Klf6	6.72	4.37	3.39	4.37	5.23	5.05	5.44	5.23
ENSMUSG00000000085_Scmh1	52.64	27.16	25.87	27.16	43.07	36.13	49.69	43.07
ENSMUSG00000000088_Cox5a	171.74	114.5	122.4	122.4	110.96	86.3	38.1	86.3
ENSMUSG00000000093_Tbx2	0.07	0.57	0	0.07	1.18	1.87	3.4	1.87
ENSMUSG00000000094_Tbx4	0	0.71	1.07	0.71	2.05	3.1	3.69	3.1
ENSMUSG00000000103_Zfy2	0.27	0	0	0	0	0	2.23	0
ENSMUSG00000000120_Ngfr	5.42	3.01	1.59	3.01	3.23	6.91	4.49	4.49
ENSMUSG00000000125_Wnt3	6.94	5.6	8.84	6.94	8.42	7.43	6.58	7.43
ENSMUSG00000000126_Wnt9a	0.07	0.16	0	0.07	1.29	4.45	2.8	2.8
ENSMUSG00000000127_Fer	20.2	18.44	17.07	18.44	18.97	18.63	14.74	18.63
ENSMUSG00000000131_Xpo6	29.72	21.17	17.45	21.17	26.79	56.22	52.39	52.39
ENSMUSG00000000134_Tfe3	9.65	9.62	3.69	9.62	5.8	10.69	16.32	10.69
ENSMUSG00000000142_Axin2	7.71	11.05	8.6	8.6	11.33	33.25	21.02	21.02
ENSMUSG00000000148_Brat1	4.87	6.26	3.39	4.87	6.94	12.42	18.65	12.42
ENSMUSG00000000149_Gna12	14.69	12.81	15.57	14.69	11.63	13.47	6.53	11.63
ENSMUSG00000000154_Slc22a18	0.2	0	0	0	0.68	0	0	0
ENSMUSG00000000157_Itgb2l	0	0.37	0	0	0.93	1.23	0	0.93
ENSMUSG00000000159_Igsf5	1.22	3.56	0	1.22	7.52	11.85	11.79	11.79
ENSMUSG00000000167_Pih1d2	2.24	7.68	4.62	4.62	13.13	10.77	10.49	10.77
ENSMUSG00000000168_Dlat	33.01	29.28	31.03	31.03	37.54	18.63	30.77	30.77
ENSMUSG00000000171_Sdhd	43.46	55.37	47.3	47.3	49.26	37.2	30.67	37.2
ENSMUSG00000000182_Fgf23	1.02	0.3	1.6	1.02	1	3.96	2.7	2.7
ENSMUSG00000000183_Fgf6	0.72	2.95	0.58	0.72	2	4.8	8.5	4.8
ENSMUSG00000000184_Ccnd2	1.08	6.23	0.71	1.08	5.09	9.08	12.52	9.08
ENSMUSG00000000194_Gpr107	42.26	28.88	24.02	28.88	34.72	87.19	60.26	60.26
ENSMUSG00000000197_Nalcn	16.01	13.67	16.45	16.01	12.18	10.36	12.23	12.18
ENSMUSG00000000202_Btbd17	21.61	14.53	12.59	14.53	10.83	13.14	7.31	10.83
ENSMUSG00000000204_Slfn4	0	0.97	0	0	0.46	2.27	2.91	2.27
ENSMUSG00000000214_Th	16.91	7.59	10.2	10.2	3.16	6.54	5.44	5.44
ENSMUSG00000000215_Ins2	0	0	0	0	9.87	5.98	0	5.98
ENSMUSG00000000216_Scnn1g	0.25	1.05	0.66	0.66	2.02	3.06	2.61	2.61
ENSMUSG00000000223_Drp2	4.61	5.04	7.15	5.04	6.49	11.84	7.11	7.11
ENSMUSG00000000244_Tspan32	0.93	1.41	0.18	0.93	4.17	4.35	6.58	4.35
ENSMUSG00000000247_Lhx2	0.58	2.33	0	0.58	4.82	11.61	10.57	10.57
ENSMUSG00000000248_Clec2g	0	2.53	1.07	1.07	2.28	2.91	1.98	2.28
ENSMUSG00000000253_Gmpr	11.12	12.74	9.93	11.12	6.39	17.18	3.16	6.39
ENSMUSG00000000263_Glra1	1.2	1.84	2.53	1.84	4.51	2.44	3.32	3.32
ENSMUSG00000000266_Mid2	12.05	12.56	14.56	12.56	11.62	10.19	7.11	10.19
ENSMUSG00000000275_Trim25	0.77	1.54	2.4	1.54	2.6	3.4	6.96	3.4
ENSMUSG00000000276_Dgke	13.13	13.08	15.25	13.13	13.93	10.81	9.96	10.81
ENSMUSG00000000278_Scpep1	3.08	3.35	3.11	3.11	2.12	1.69	4.6	2.12
ENSMUSG00000000282_Mnt	3.76	3.44	4.01	3.76	4.61	10.93	7.03	7.03
ENSMUSG00000000290_Itgb2	1.28	1.06	0	1.06	1.75	3.52	2.63	2.63
ENSMUSG00000000295_Hddc2	11.49	7.57	8.86	8.86	8.96	11.22	17.21	11.22
ENSMUSG00000000296_Tpd52l1	12.31	4.59	4.85	4.85	8.99	18.95	8.15	8.99
ENSMUSG00000000301_Pemt	0	0.9	9.21	0.9	1.05	5.06	0	1.05
ENSMUSG00000000303_Cdh1	1.64	1.96	2.35	1.96	3.44	3.03	3.45	3.44
ENSMUSG00000000305_Cdh4	7.79	5.36	8.31	7.79	13.2	7.6	17.56	13.2
ENSMUSG00000000308_Ckmt1	123.18	100.51	122.76	122.76	124.35	77.43	90.12	90.12
ENSMUSG00000000317_Bcl6b	0.44	5.59	0.93	0.93	1.02	15.06	8.23	8.23
ENSMUSG00000000318_Clec10a	0.22	3.02	0	0.22	0.38	7.53	4.36	4.36
ENSMUSG00000000320_Alox12	0.11	0.46	0.26	0.26	5.05	4.02	5.5	5.05
ENSMUSG00000000325_Arvcf	6.36	9.99	2.54	6.36	13.42	5.2	8.35	8.35
ENSMUSG00000000326_Comt	18.47	13.57	16.35	16.35	18	13.55	16.49	16.49
ENSMUSG00000000339_Rtca	30.34	23.4	25.14	25.14	15.53	40.36	24.79	24.79
ENSMUSG00000000340_Dbt	11.3	10.29	5.49	10.29	10.15	8.95	4.75	8.95
ENSMUSG00000000346_Dazap2	31.94	27.64	29.06	29.06	28.16	20.33	22.34	22.34
ENSMUSG00000000355_Mcts1	41.35	37.62	25.9	37.62	38.72	21.95	25.39	25.39
ENSMUSG00000000359_Rem1	0	0.39	0	0	1.29	10.27	24.9	10.27
ENSMUSG00000000365_Rnf17	0.98	1.38	0.89	0.98	1.14	1.3	3.24	1.3
ENSMUSG00000000374_Trappc10	11.45	10.56	9.19	10.56	9.35	6.83	9.32	9.32
ENSMUSG00000000378_Ccm2	20.82	24.61	20.41	20.82	25.16	42.52	43.3	42.52
ENSMUSG00000000381_Wap	0	0	0	0	2.25	0	4.09	2.25
ENSMUSG00000000384_Tbrg4	7.49	13.65	8.1	8.1	19.23	7.94	22.56	19.23
ENSMUSG00000000385_Tmprss2	0.39	0.16	0.37	0.37	0.27	2.53	0.49	0.49
ENSMUSG00000000386_Mx1	0.19	0.39	0.3	0.3	1.94	2.99	4.66	2.99
ENSMUSG00000000392_Fap	0.17	1.6	4.43	1.6	1.31	1.2	1.93	1.31
ENSMUSG00000000394_Gcg	0	1.1	0	0	3.68	1.87	1.63	1.87
ENSMUSG00000000399_Ndufa9	59.8	50.73	51.95	51.95	48.28	57.34	53.63	53.63
ENSMUSG00000000402_Egfl6	0.28	0.39	0.29	0.29	0.64	0.43	1.74	0.64
ENSMUSG00000000409_Lck	0.25	5.83	0	0.25	5.3	24.5	20.51	20.51
ENSMUSG00000000411_Tssk3	0.22	0.91	1.03	0.91	2.22	6.9	4.03	4.03
ENSMUSG00000000416_Cttnbp2	82.39	63.79	41.27	63.79	76.51	65.95	59.81	65.95
ENSMUSG00000000420_Galnt1	43.94	28.79	33.63	33.63	22.87	30.59	19	22.87
ENSMUSG00000000435_Myf5	0.12	0	0	0	3.42	0	4.63	3.42
ENSMUSG00000000439_Mkrn2	6.33	8.26	6.18	6.33	9.11	12.09	9.42	9.42
ENSMUSG00000000440_Pparg	2.79	3.8	2.59	2.79	4.7	5.19	5.89	5.19
ENSMUSG00000000441_Raf1	26.89	22.68	32.1	26.89	32.64	28.78	29.52	29.52
ENSMUSG00000000486_Sept1	5.76	8	3.63	5.76	19.12	34.22	24.73	24.73
ENSMUSG00000000489_Pdgfb	0.34	1.08	0.81	0.81	1.48	5.89	3.21	3.21
ENSMUSG00000000530_Acvrl1	0.42	6.01	0	0.42	0.49	7.78	1.77	1.77
ENSMUSG00000000531_Grasp	0.78	0.27	1.83	0.78	0.44	2.94	3.21	2.94
ENSMUSG00000000532_Acvr1b	9.64	6.83	9.44	9.44	6.33	5.83	6.57	6.33
ENSMUSG00000000538_Tom1l2	55.15	50.23	41.6	50.23	39.41	50.72	49.36	49.36
ENSMUSG00000000544_Gpa33	0.3	3.42	0	0.3	2.78	8.89	3.59	3.59
ENSMUSG00000000552_Zfp385a	34.83	15.88	17.99	17.99	18.87	31.64	22.26	22.26
ENSMUSG00000000555_Itga5	0.33	0.35	0.18	0.33	0.39	3.07	1.74	1.74
ENSMUSG00000000560_Gabra2	17.47	14.28	10.92	14.28	19.55	18.65	21.19	19.55
ENSMUSG00000000561_Wdr77	7.05	10.24	7.65	7.65	14.98	13.51	16.4	14.98
ENSMUSG00000000562_Adora3	0.11	1.9	0	0.11	1.48	12.98	4.29	4.29
ENSMUSG00000000563_Atp5f1	143.74	167.05	182.11	167.05	178.09	124.93	125.12	125.12
ENSMUSG00000000567_Sox9	32.86	19.46	21.91	21.91	29.17	26.61	25.18	26.61
ENSMUSG00000000568_Hnrnpd	231.28	169.66	189.13	189.13	183.22	324.11	188.44	188.44
ENSMUSG00000000579_Dynlt1c	11.31	11.66	15.99	11.66	15.81	35.42	21.62	21.62
ENSMUSG00000000581_C1d	16.77	20.96	26.73	20.96	31.31	71.37	21.42	31.31
ENSMUSG00000000594_Gm2a	8.94	8.57	12.48	8.94	5.56	8.16	6.68	6.68
ENSMUSG00000000600_Krit1	26.99	38.98	31.64	31.64	42.83	34.72	39.22	39.22
ENSMUSG00000000605_Clcn4	36.66	26.62	33.15	33.15	20.13	23.19	24.3	23.19
ENSMUSG00000000606_Vmn2r88	0	0.76	0	0	1.25	0.45	0.61	0.61
ENSMUSG00000000617_Grm6	0	1.63	0.83	0.83	3.09	3.78	3.75	3.75
ENSMUSG00000000627_Sema4f	5.48	5.81	8.8	5.81	5.83	22.01	4.62	5.83
ENSMUSG00000000628_Hk2	12.77	11.65	12.2	12.2	16.13	12.49	18.19	16.13
ENSMUSG00000000631_Myo18a	52.67	61.1	47.37	52.67	49.34	64.44	99	64.44
ENSMUSG00000000632_Sez6	21.9	12.82	20.38	20.38	13.54	18.7	22.71	18.7
ENSMUSG00000000673_Haao	0	0	0	0	0	0	0	0
ENSMUSG00000000682_Cd52	0	2.76	0	0	4.1	0	7.7	4.1
ENSMUSG00000000686_Abhd15	1.63	13.09	0.45	1.63	4.53	7.47	5.91	5.91
ENSMUSG00000000690_Hoxb6	0.53	0.86	0.66	0.66	3.19	9.47	10.35	9.47
ENSMUSG00000000693_Loxl3	1.45	2.8	2.85	2.8	8.71	5.66	6.2	6.2
ENSMUSG00000000701_Tcl1b5	0	0.58	0	0	0	3.8	1.72	1.72
ENSMUSG00000000706_Btn1a1	0.29	1.51	0.11	0.29	4.07	10.93	1.36	4.07
ENSMUSG00000000708_Kat2b	112.35	74.78	56.08	74.78	79.95	45.14	64.86	64.86
ENSMUSG00000000711_Rab5b	22.43	17.83	18.67	18.67	28.2	17.28	27.99	27.99
ENSMUSG00000000724_Cryba1	0.2	0.42	0	0.2	2.04	3.62	0	2.04
ENSMUSG00000000730_Dnmt3l	0	3.71	1.62	1.62	4.68	13.68	24.93	13.68
ENSMUSG00000000731_Aire	0	1.09	0	0	7.45	5.15	8.05	7.45
ENSMUSG00000000732_Icosl	3.73	4.77	5.48	4.77	4.1	3.34	3.99	3.99
ENSMUSG00000000738_Spg7	39.58	28.65	19.04	28.65	23.16	27.69	29.33	27.69
ENSMUSG00000000739_Sult5a1	0.54	0.57	0	0.54	0	0	7.13	0
ENSMUSG00000000740_Rpl13	106.54	84.4	94.56	94.56	50.33	81.24	53.46	53.46
ENSMUSG00000000743_Chmp1a	12.56	9.01	9.87	9.87	9.65	11.21	9.57	9.65
ENSMUSG00000000751_Rpa1	33.96	17.94	21.06	21.06	18	17.13	31.03	18
ENSMUSG00000000753_Serpinf1	2.5	3.39	9.81	3.39	6.84	8.49	7.73	7.73
ENSMUSG00000000759_Tubgcp3	12.96	17.62	25.98	17.62	20.47	15.61	23.89	20.47
ENSMUSG00000000766_Oprm1	0.84	2.86	0.3	0.84	5.76	9.27	11.82	9.27
ENSMUSG00000000776_Polr3d	24.11	14.85	14.17	14.85	10.44	22.76	15.08	15.08
ENSMUSG00000000782_Tcf7	0.31	1.62	0.97	0.97	1.06	1.41	0.64	1.06
ENSMUSG00000000787_Ddx3x	187.21	216.34	194.55	194.55	225.12	219.1	185.26	219.1
ENSMUSG00000000791_Il12rb1	0.09	0.55	0.41	0.41	1.21	1.2	1.09	1.2
ENSMUSG00000000792_Slc5a5	0.09	0.36	0	0.09	2.07	0.39	3.74	2.07
ENSMUSG00000000794_Kcnn3	2.85	3.28	1.33	2.85	4.45	8.43	10.1	8.43
ENSMUSG00000000804_Usp32	114.89	66.19	119.73	114.89	99.28	74.16	155.47	99.28
ENSMUSG00000000805_Car4	29.02	21.3	19.22	21.3	22.03	23.35	16.47	22.03
ENSMUSG00000000811_Txnrd3	2.82	4.26	1.12	2.82	1.22	3.08	2.21	2.21
ENSMUSG00000000817_Fasl	0.14	0.56	0	0.14	4.17	6.67	7.53	6.67
ENSMUSG00000000823_Zfp512b	17.45	6.09	16.04	16.04	19.34	42.35	21.75	21.75
ENSMUSG00000000826_Dnajc5	33.84	27.3	38.6	33.84	33.16	23.84	22.81	23.84
ENSMUSG00000000827_Tpd52l2	49.25	54.37	50.62	50.62	41.01	57.89	19.22	41.01
ENSMUSG00000000838_Fmr1	46.17	45.44	66.61	46.17	63.05	125.35	65.52	65.52
ENSMUSG00000000861_Bcl11a	38.92	24.56	26.9	26.9	28.96	42.68	20.15	28.96
ENSMUSG00000000869_Il4	0	0	0	0	4.19	3.18	0	3.18
ENSMUSG00000000876_Pxmp4	2.33	5.57	4.27	4.27	5.86	7.01	6.75	6.75
ENSMUSG00000000881_Dlg3	20.88	19.97	19.76	19.97	18.13	25.19	27.11	25.19
ENSMUSG00000000884_Gnb1l	0.62	3.39	0.84	0.84	2.69	5.19	3.52	3.52
ENSMUSG00000000889_Dbh	0.1	1.04	0	0.1	0.69	0.91	3.71	0.91
ENSMUSG00000000901_Mmp11	2.12	1.66	2.51	2.12	2.1	11.22	8.35	8.35
ENSMUSG00000000902_Smarcb1	59.49	40.26	55.73	55.73	39.17	74.6	77.14	74.6
ENSMUSG00000000903_Vpreb3	0	0	0	0	7.34	0	3.37	3.37
ENSMUSG00000000915_Hip1r	32.51	20.03	21.15	21.15	25.56	42.32	38.45	38.45
ENSMUSG00000000916_Nsun5	9.08	7.16	15.49	9.08	19.27	11.98	7.91	11.98
ENSMUSG00000000934_Top1mt	6.48	6.88	5.64	6.48	4.25	7.51	4.27	4.27
ENSMUSG00000000938_Hoxa10	0	0.99	0.3	0.3	2.53	2.64	5.19	2.64
ENSMUSG00000000942_Hoxa4	0	0.35	1.86	0.35	0.58	1.53	0	0.58
ENSMUSG00000000948_Gm38393	36.29	56.23	41.14	41.14	52.8	36.11	22.57	36.11
ENSMUSG00000000957_Mmp14	9.96	7.24	5.85	7.24	11.63	20.7	11.73	11.73
ENSMUSG00000000958_Slc7a7	1.86	4.35	2.41	2.41	3.44	7.69	0	3.44
ENSMUSG00000000959_Oxa1l	13.51	15.73	7.54	13.51	11.6	28.42	17.78	17.78
ENSMUSG00000000976_Heatr6	4.25	4.5	4.63	4.5	9.01	33.2	27.41	27.41
ENSMUSG00000000982_Ccl3	0	2.6	0	0	0	0	0	0
ENSMUSG00000000983_Wfdc18	0	1.54	0	0	2.21	1.48	0	1.48
ENSMUSG00000001014_Icam4	0	1.39	0	0	0	1.5	4.08	1.5
ENSMUSG00000001016_Ilf2	29.6	44.96	21.69	29.6	32.85	39.27	26.89	32.85
ENSMUSG00000001017_Chtop	35.7	31.67	38.24	35.7	31.54	27.63	26.37	27.63
ENSMUSG00000001018_Snapin	29.4	18.32	38.85	29.4	15.56	17.61	17.8	17.61
ENSMUSG00000001020_S100a4	0	0	0	0	0	0	0	0
ENSMUSG00000001021_S100a3	1.84	2.03	0.88	1.84	7.43	14.3	14.21	14.21
ENSMUSG00000001023_S100a5	0	0	0	0	0	0	0	0
ENSMUSG00000001025_S100a6	8.02	7.44	12.63	8.02	6	9.15	31.73	9.15
ENSMUSG00000001027_Scn4a	0.22	0.38	0.17	0.22	1.39	5.01	5.24	5.01
ENSMUSG00000001029_Icam2	1.1	4.88	1.71	1.71	3.32	15.87	4.19	4.19
ENSMUSG00000001034_Mapk7	13.23	7.8	12.22	12.22	5.72	16.45	10.88	10.88
ENSMUSG00000001036_Epn2	23.1	27.32	16.01	23.1	23.69	8.99	16.48	16.48
ENSMUSG00000001039_B9d1	9.49	8.86	17.03	9.49	10.99	16.23	4.18	10.99
ENSMUSG00000001052_Sec24b	26.88	17.86	19.2	19.2	49.01	66.97	23.76	49.01
ENSMUSG00000001053_N4bp3	13.99	7.66	6.81	7.66	12	12.31	27.05	12.31
ENSMUSG00000001054_Rmnd5b	15.04	13.73	13.74	13.74	13.81	4.28	15.46	13.81
ENSMUSG00000001056_Nhp2	15.8	12.37	15.27	15.27	11.34	12.16	21.64	12.16
ENSMUSG00000001062_Vps9d1	18.05	14.34	8.69	14.34	12.37	15.58	31.38	15.58
ENSMUSG00000001065_Zfp276	3.8	3.02	7.52	3.8	7.28	16.39	11.24	11.24
ENSMUSG00000001076_C1ql4	0	0	0	0	0	1.57	0	0
ENSMUSG00000001082_Mfsd10	4.13	7.91	5.97	5.97	8.39	23.82	431.56	23.82
ENSMUSG00000001089_Luzp1	53.69	49.72	34.21	49.72	64.65	49.29	47.61	49.29
ENSMUSG00000001095_Slc13a2	0.21	0.22	0.17	0.21	3.43	5.1	4.14	4.14
ENSMUSG00000001098_Kctd10	11.67	3.78	5.45	5.45	5.14	13.29	21.95	13.29
ENSMUSG00000001100_Poldip2	34.39	19.51	20.56	20.56	17.91	33.64	43.18	33.64
ENSMUSG00000001103_Sebox	2.17	3.56	3.36	3.36	3.63	14.51	14.49	14.49
ENSMUSG00000001105_Ift20	72.62	88.76	53.63	72.62	44.22	92.86	58.74	58.74
ENSMUSG00000001119_Col6a1	3.56	3.71	3.11	3.56	5.05	3.01	8.09	5.05
ENSMUSG00000001120_Pcbp3	29.77	21.87	61.81	29.77	24.88	32.5	43.12	32.5
ENSMUSG00000001123_Lgals9	1.61	3.3	1.4	1.61	1.82	2.42	2.65	2.42
ENSMUSG00000001127_Araf	56.86	60.42	50.36	56.86	50.48	41.05	48.02	48.02
ENSMUSG00000001128_Cfp	1.81	4.76	0.77	1.81	2.79	10.11	0	2.79
ENSMUSG00000001131_Timp1	0.39	0.78	0	0.39	0	1.67	0	0
ENSMUSG00000001134_Uxt	8.78	13.15	10.01	10.01	6.2	1.57	0	1.57
ENSMUSG00000001138_Cnnm3	8.1	2.93	3.25	3.25	3.02	6.6	4.45	4.45
ENSMUSG00000001143_Lman2l	15.53	14.76	18.82	15.53	13.95	35.19	24.91	24.91
ENSMUSG00000001150_Mcm3ap	9.85	6.46	6.97	6.97	7.47	7.78	9.44	7.78
ENSMUSG00000001151_Pcnt	14.99	11.07	13.57	13.57	12.77	16.7	18.77	16.7
ENSMUSG00000001155_Ftcd	0.17	0.36	0	0.17	0.89	3.54	3.76	3.54
ENSMUSG00000001156_Mxd1	7.44	7.65	12.91	7.65	10.85	13.11	17.2	13.11
ENSMUSG00000001157_Gmcl1	8.55	19.4	11.18	11.18	25.52	33.78	38.03	33.78
ENSMUSG00000001158_Snrnp27	172.76	95.62	105.71	105.71	91.92	248.59	205.51	205.51
ENSMUSG00000001166_Oas1c	0	0	0	0	1.31	2.04	0	1.31
ENSMUSG00000001168_Oas1h	0	0	0	0	1.6	2.84	0	1.6
ENSMUSG00000001173_Ocrl	25.09	23.43	26.69	25.09	35.08	22.77	27.57	27.57
ENSMUSG00000001175_Calm1	685.87	719.54	704.84	704.84	907.28	671.81	617.1	671.81
ENSMUSG00000001211_Agpat3	86.32	55.1	66.72	66.72	53.43	54.88	57.21	54.88
ENSMUSG00000001225_Slc26a3	0.66	1.21	0	0.66	1.24	7.8	1.97	1.97
ENSMUSG00000001227_Sema6b	7.45	5.52	3.65	5.52	4.34	7.62	4.94	4.94
ENSMUSG00000001228_Uhrf1	1.63	1.24	0	1.24	3.21	2.76	0.46	2.76
ENSMUSG00000001229_Dpp9	4.62	6.34	6.79	6.34	6.83	6.46	3.52	6.46
ENSMUSG00000001240_Ramp2	23.5	18.25	10.85	18.25	22.78	36.76	30.24	30.24
ENSMUSG00000001247_Lsr	1.87	1.41	4.27	1.87	1.89	4.5	11.99	4.5
ENSMUSG00000001248_Gramd1a	15.6	9.75	11.23	11.23	21.35	20.98	24.65	21.35
ENSMUSG00000001249_Hpn	0.14	1.61	0.41	0.41	11.23	10.82	22.57	11.23
ENSMUSG00000001260_Gabrg1	9.05	9.24	10.31	9.24	9.02	8.03	13.34	9.02
ENSMUSG00000001270_Ckb	859.04	527.94	662.2	662.2	484.45	530.55	491.39	491.39
ENSMUSG00000001280_Sp1	24.22	16.29	51.04	24.22	13.33	18.88	31.67	18.88
ENSMUSG00000001281_Itgb7	1.32	0.59	0.15	0.59	0.33	5.45	0	0.33
ENSMUSG00000001285_Myg1	29.11	16.15	34.48	29.11	12.91	18.45	23.59	18.45
ENSMUSG00000001288_Rarg	4.26	3.78	1.02	3.78	3.21	20.94	17.21	17.21
ENSMUSG00000001289_Pfdn5	136.1	147.02	113.55	136.1	153.99	105.01	146.93	146.93
ENSMUSG00000001300_Efnb2	19.42	14.31	11.75	14.31	12.71	22.17	19.6	19.6
ENSMUSG00000001305_Rrp15	13.05	10.61	10.35	10.61	12.65	18.61	14.37	14.37
ENSMUSG00000001313_Rnd2	32.24	22.69	34.99	32.24	36.95	26.36	37.65	36.95
ENSMUSG00000001323_Srr	22.94	27.39	21.79	22.94	33.83	18.65	15.59	18.65
ENSMUSG00000001333_Sync	0.11	0.46	0.2	0.2	2.3	5.51	9.47	5.51
ENSMUSG00000001334_Fndc5	50.78	42.08	41	42.08	40.59	38.32	37.48	38.32
ENSMUSG00000001348_Acp5	0	0.85	0	0	0	6.2	3.79	3.79
ENSMUSG00000001349_Cnn1	0	0.45	0	0	0.37	2.95	0.67	0.67
ENSMUSG00000001366_Fbxo9	24.64	29.63	18.87	24.64	26.7	30.59	45.55	30.59
ENSMUSG00000001376_Vps50	20.47	33.3	13.27	20.47	23.32	26.57	13.3	23.32
ENSMUSG00000001380_Hars	36.24	31.57	30.38	31.57	21.91	31.4	21.96	21.96
ENSMUSG00000001383_Zmat2	84.69	71.44	79.99	79.99	70.06	92.33	105.35	92.33
ENSMUSG00000001403_Ube2c	0	1.47	1.93	1.47	0.81	9.64	7.3	7.3
ENSMUSG00000001415_Smg5	20.29	23.48	23.69	23.48	28.83	22.15	41.57	28.83
ENSMUSG00000001416_Cct3	45.62	41.89	38.6	41.89	43.83	38.3	28.88	38.3
ENSMUSG00000001418_Glmp	17.27	10.9	17.47	17.27	11.88	22.54	16.18	16.18
ENSMUSG00000001419_Mef2d	40.22	24.59	41.4	40.22	29.86	67.62	38.29	38.29
ENSMUSG00000001420_Tmem79	1.26	0.92	0	0.92	1.26	8.45	2.47	2.47
ENSMUSG00000001424_Snd1	35.95	36.22	28.01	35.95	24.51	48.23	22.49	24.51
ENSMUSG00000001435_Col18a1	55.95	36.67	52.05	52.05	45.53	45.21	70.82	45.53
ENSMUSG00000001436_Slc19a1	4.14	12.18	2.44	4.14	5.65	6.47	14.43	6.47
ENSMUSG00000001440_Kpnb1	44.02	57.88	60.73	57.88	61.43	27.21	40.07	40.07
ENSMUSG00000001441_Npepps	58.39	43.33	65.63	58.39	64.86	50.36	55.15	55.15
ENSMUSG00000001444_Tbx21	0	0.43	0	0	1.41	5.6	5.09	5.09
ENSMUSG00000001445_Mrpl10	12.97	7.45	10.94	10.94	5.02	14.14	12.52	12.52
ENSMUSG00000001467_Cyp51	17.81	11.03	18.03	17.81	16.6	24.69	7.46	16.6
ENSMUSG00000001472_Tcf25	121.35	92.73	96.73	96.73	86.35	92.54	105.25	92.54
ENSMUSG00000001473_Tubb6	1.21	0.31	1.42	1.21	2.06	2.05	2.8	2.06
ENSMUSG00000001482_Def8	51.5	32.29	52.35	51.5	32.67	22.6	27.59	27.59
ENSMUSG00000001493_Meox1	0.46	0.96	0	0.46	0.79	3.16	3.59	3.16
ENSMUSG00000001494_Sost	0.5	0.79	0	0.5	1.72	11.43	3.9	3.9
ENSMUSG00000001496_Nkx2-1	0	2.63	0.18	0.18	4.05	1.04	3.71	3.71
ENSMUSG00000001497_Pax9	0.47	0.86	0.46	0.47	3.26	8.43	9.35	8.43
ENSMUSG00000001504_Irx2	1.97	2.87	0.76	1.97	4.93	14.14	17.29	14.14
ENSMUSG00000001506_Col1a1	8.05	3.98	0.26	3.98	3.46	28.48	8.52	8.52
ENSMUSG00000001507_Itga3	26.19	21.66	12.76	21.66	8.04	23.29	25	23.29
ENSMUSG00000001508_Sgca	0	2.41	0	0	3.97	10.11	8.51	8.51
ENSMUSG00000001510_Dlx3	0.77	1.22	1.23	1.22	0.67	7.54	6.65	6.65
ENSMUSG00000001517_Foxm1	0.8	7.09	0.6	0.8	6.96	23.4	37.09	23.4
ENSMUSG00000001518_Itfg2	21.35	16.76	13.45	16.76	44.76	28.04	29.87	29.87
ENSMUSG00000001520_Nrip2	4.42	5.23	5	5	8.19	8.75	12.4	8.75
ENSMUSG00000001521_Tulp3	16.06	19.24	14.05	16.06	25.59	23.2	27.52	25.59
ENSMUSG00000001524_Gtf2h4	16.49	18.75	18.05	18.05	17.79	33.19	17.03	17.79
ENSMUSG00000001525_Tubb5	48.44	50.51	38.54	48.44	50.9	69.75	59.79	59.79
ENSMUSG00000001542_Ell2	9.39	9.2	8.02	9.2	11.72	9.61	4.23	9.61
ENSMUSG00000001552_Jup	29.65	14.65	26.44	26.44	21.32	42.04	25.11	25.11
ENSMUSG00000001555_Fkbp10	5.43	2.55	3.52	3.52	3.16	4.86	3.66	3.66
ENSMUSG00000001558_Klhl10	0.13	2.68	0	0.13	1.08	2.35	1.97	1.97
ENSMUSG00000001566_Mnx1	0.13	0.54	0	0.13	1.33	4.11	0.8	1.33
ENSMUSG00000001569_Nom1	6.61	5.73	14.98	6.61	7.19	8.3	9.22	8.3
ENSMUSG00000001576_Ergic1	46.32	42.34	27.18	42.34	39.7	32.37	31.32	32.37
ENSMUSG00000001583_Tnk1	0	0.6	0	0	0.5	5.71	0	0.5
ENSMUSG00000001588_Acap1	0.5	2.13	0.53	0.53	5.24	12.56	18.88	12.56
ENSMUSG00000001604_Tcea3	0	0	1.75	0	0	0	0	0
ENSMUSG00000001622_Csn3	0	0.93	3.3	0.93	7.37	7.43	12.26	7.43
ENSMUSG00000001627_Ifrd1	50.23	62.35	76.37	62.35	56.89	86.71	103.88	86.71
ENSMUSG00000001630_Stk38l	10.69	9.69	7.08	9.69	6.29	10.49	6.03	6.29
ENSMUSG00000001632_Brpf1	23.78	19.5	17.2	19.5	25.3	26.79	17.17	25.3
ENSMUSG00000001642_Akr1b3	16.24	16.32	4.06	16.24	20.2	11.33	12.15	12.15
ENSMUSG00000001655_Hoxc13	0	0.22	0	0	1.43	2.36	2.57	2.36
ENSMUSG00000001656_Hoxc11	0.39	2.15	0.41	0.41	1.32	5.86	11.97	5.86
ENSMUSG00000001657_Hoxc8	0.12	2.92	0	0.12	4.38	8.44	7.91	7.91
ENSMUSG00000001661_Hoxc6	0.68	1.82	2.94	1.82	4.57	21.78	16.67	16.67
ENSMUSG00000001663_Gstt1	4.34	8.78	6.64	6.64	10.21	6.06	21.7	10.21
ENSMUSG00000001665_Gstt3	0.56	3.77	0	0.56	11.24	30.76	34.24	30.76
ENSMUSG00000001666_Ddt	68.19	62.54	152.83	68.19	60.51	119.95	103.05	103.05
ENSMUSG00000001670_Tat	0.11	0.22	0	0.11	0.37	0.49	2.01	0.49
ENSMUSG00000001672_Marveld3	0.1	0.65	1.96	0.65	5.03	8.02	6.13	6.13
ENSMUSG00000001674_Ddx18	13.96	7.86	8.46	8.46	19.75	4.55	5.81	5.81
ENSMUSG00000001687_Ubl3	194.53	134.88	137.56	137.56	116.06	195.99	180.21	180.21
ENSMUSG00000001700_Gramd3	7.93	6.7	8.28	7.93	6.7	4.88	11.5	6.7
ENSMUSG00000001707_Eef1e1	16.58	12.96	4.45	12.96	6.69	10.22	12.17	10.22
ENSMUSG00000001729_Akt1	23.29	12.63	24.74	23.29	13.3	13	21.94	13.3
ENSMUSG00000001739_Cldn15	0	0.89	0	0	0.97	5.66	2.64	2.64
ENSMUSG00000001741_Il16	28	20.28	31.07	28	18.29	23.76	23.49	23.49
ENSMUSG00000001750_Tcirg1	2.18	1.05	6.95	2.18	8.15	13.05	2.9	8.15
ENSMUSG00000001751_Naglu	0.69	1.86	1.09	1.09	1.37	7.69	2.47	2.47
ENSMUSG00000001755_Coasy	4.65	4.67	1.14	4.65	3.74	5.86	7.32	5.86
ENSMUSG00000001761_Smo	8.57	8.66	6.33	8.57	7.39	13.43	15.26	13.43
ENSMUSG00000001763_Tspan33	9.74	5.19	4.11	5.19	7.97	7.31	7.89	7.89
ENSMUSG00000001767_Crnkl1	17.36	20.4	28.91	20.4	27.49	31.46	32.76	31.46
ENSMUSG00000001768_Rin2	6.37	7.73	5.54	6.37	17.95	7.25	37.28	17.95
ENSMUSG00000001773_Folh1	8.24	6.5	7.94	7.94	10.79	4.75	5.03	5.03
ENSMUSG00000001774_Chordc1	42.19	41.15	36.99	41.15	44.56	32.46	36.27	36.27
ENSMUSG00000001783_Rtcb	53.56	52.37	57.33	53.56	49.35	70.82	56.75	56.75
ENSMUSG00000001785_Pwp1	8.83	7.82	12.13	8.83	4.08	8.12	6.14	6.14
ENSMUSG00000001786_Fbxo7	8.82	11.44	6.88	8.82	22.8	9.14	19.02	19.02
ENSMUSG00000001794_Capns1	59.51	42.14	40.62	42.14	63.57	44.78	50.23	50.23
ENSMUSG00000001802_Lrp3	10.25	11.97	7.06	10.25	18.9	35.51	4.63	18.9
ENSMUSG00000001804_Dsg4	0	1.04	0.34	0.34	0.99	3.26	5.33	3.26
ENSMUSG00000001815_Evx2	0	0.49	0	0	1.31	1.61	1.1	1.31
ENSMUSG00000001819_Hoxd13	0.1	0.43	1.29	0.43	2.12	1.4	2.55	2.12
ENSMUSG00000001823_Hoxd12	0.6	0.21	0	0.21	0.69	2.74	2.49	2.49
ENSMUSG00000001827_Folr1	0.64	6.14	1.69	1.69	4.7	21.36	5.47	5.47
ENSMUSG00000001829_Clpb	29.16	21.13	13.25	21.13	20.96	20.74	19.07	20.74
ENSMUSG00000001833_Sept7	409.04	546.85	382.06	409.04	573.09	455.65	484.64	484.64
ENSMUSG00000001844_Zdhhc4	13.19	11.01	10.84	11.01	15.05	29.95	17.6	17.6
ENSMUSG00000001847_Rac1	170.92	154.7	144.68	154.7	122.97	93.54	89.1	93.54
ENSMUSG00000001855_Nup214	19.48	11.21	21.07	19.48	24.47	35.79	34.28	34.28
ENSMUSG00000001864_Aif1l	2.23	4.54	3.44	3.44	4.54	14.63	16.92	14.63
ENSMUSG00000001865_Cpa3	0	0	0	0	4.49	2.56	0	2.56
ENSMUSG00000001870_Ltbp1	2.58	4.97	1.74	2.58	7.16	19.45	22.13	19.45
ENSMUSG00000001891_Ugp2	29.78	22.34	24.94	24.94	23.93	21.97	15.77	21.97
ENSMUSG00000001901_Kcnh6	0.15	0.31	0.85	0.31	1.78	3.71	1.58	1.78
ENSMUSG00000001909_Trmt1	10.56	48	23.46	23.46	33.05	27.72	29.81	29.81
ENSMUSG00000001910_Nacc1	33.49	20.79	25.6	25.6	21.07	21.89	24.53	21.89
ENSMUSG00000001911_Nfix	69.2	41.19	45.46	45.46	48.93	84.65	51.81	51.81
ENSMUSG00000001918_Slc1a5	0.94	0.38	0.72	0.72	9.24	19.31	13.45	13.45
ENSMUSG00000001924_Uba1	100.18	78.25	90.36	90.36	75.83	62.74	59.43	62.74
ENSMUSG00000001930_Vwf	1.97	5.59	0.15	1.97	9.68	22.93	23.97	22.93
ENSMUSG00000001942_Siae	1.22	3.32	2.51	2.51	3	4.29	4.05	4.05
ENSMUSG00000001943_Vsig2	0	0	0	0	0.82	2.19	0	0.82
ENSMUSG00000001946_Esam	1.55	2.64	4.4	2.64	8.11	10.16	6.11	8.11
ENSMUSG00000001948_Spa17	10.34	2.01	6.09	6.09	4.81	8.65	2.94	4.81
ENSMUSG00000001962_Fam50a	22.49	16.91	20.3	20.3	27.77	32.8	33.84	32.8
ENSMUSG00000001964_Emd	31.41	10.06	13.53	13.53	5.49	22.07	25.45	22.07
ENSMUSG00000001983_Taco1	12.33	11.1	11.91	11.91	8.79	9	13.48	9
ENSMUSG00000001985_Grik3	6.82	7.55	7.89	7.55	9.24	10.73	11.47	10.73
ENSMUSG00000001986_Gria3	98.2	81.85	91.87	91.87	104.76	64.71	80.53	80.53
ENSMUSG00000001988_Npas1	0	0	0	0	0.43	1.69	0	0.43
ENSMUSG00000001995_Sipa1l2	5.56	3.87	4.24	4.24	7.62	5.2	7.1	7.1
ENSMUSG00000001998_Ap4e1	8.32	9.62	11.04	9.62	16.89	11.85	7.75	11.85
ENSMUSG00000001999_Blvra	12.93	14.05	15.55	14.05	10.32	11.08	5.32	10.32
ENSMUSG00000002006_Pdzd4	10.48	9.42	10.3	10.3	7.19	10.91	10.64	10.64
ENSMUSG00000002007_Srpk3	1.5	1.6	0	1.5	3	0.85	3.48	3
ENSMUSG00000002010_Idh3g	86.26	72.97	103.25	86.26	44.39	41.8	45.5	44.39
ENSMUSG00000002012_Pnck	5.98	4.47	5.69	5.69	1.86	0	2.18	1.86
ENSMUSG00000002014_Ssr4	29.69	37.88	28.07	29.69	65.6	35.28	23.09	35.28
ENSMUSG00000002015_Bcap31	34.76	34.58	26.87	34.58	35.25	24.01	21.32	24.01
ENSMUSG00000002017_Fam98a	14.96	21.49	8.79	14.96	16.64	20.29	48.23	20.29
ENSMUSG00000002020_Ltbp2	3.69	2.53	0.96	2.53	4.48	11.61	5.57	5.57
ENSMUSG00000002028_Kmt2a	31.42	23.44	22.06	23.44	31.49	44.15	54.1	44.15
ENSMUSG00000002031_Ift46	75.59	48.97	54.12	54.12	51.51	60.92	80.92	60.92
ENSMUSG00000002032_Tmem25	16.19	13.45	13.72	13.72	15.89	19.41	15.08	15.89
ENSMUSG00000002033_Cd3g	0	0	0	0	0	1.29	1.76	1.29
ENSMUSG00000002043_Trappc6a	4.67	7.63	7.17	7.17	1.51	18.69	0	1.51
ENSMUSG00000002052_Supt6	76.85	53.51	50.65	53.51	48.93	79.14	71.28	71.28
ENSMUSG00000002055_Spag5	29.07	53.61	15.39	29.07	40.68	43.58	66.67	43.58
ENSMUSG00000002057_Foxn1	0.08	0.49	0.24	0.24	1.87	5.67	4.35	4.35
ENSMUSG00000002058_Unc119	9.15	4.9	2.59	4.9	9.36	31.6	16.57	16.57
ENSMUSG00000002059_Rab34	12.58	9.91	5.94	9.91	16.55	28.17	32.99	28.17
ENSMUSG00000002064_Sdf2	19.78	18.9	16.76	18.9	11.97	9.96	20.35	11.97
ENSMUSG00000002068_Ccne1	7.61	9.7	6.59	7.61	15.01	18.76	16.62	16.62
ENSMUSG00000002076_Hsf2bp	0.17	0.8	0.28	0.28	1.81	2	4.37	2
ENSMUSG00000002083_Bbc3	1.8	0	0.23	0.23	1	4.67	2.12	2.12
ENSMUSG00000002100_Mybpc3	3.5	2.34	5.39	3.5	3.67	4.04	4.78	4.04
ENSMUSG00000002102_Psmc3	101.16	136.1	133.22	133.22	88.5	168.34	142.73	142.73
ENSMUSG00000002103_Acp2	26.46	30.01	21.85	26.46	13.96	32.32	26.86	26.86
ENSMUSG00000002104_Rapsn	0	0	0	0	0	0.85	0	0
ENSMUSG00000002105_Slc39a13	13.66	13.18	12.85	13.18	29.63	54.72	48.23	48.23
ENSMUSG00000002107_Celf2	105.05	95.63	65.77	95.63	100.55	79.82	92.3	92.3
ENSMUSG00000002108_Nr1h3	2.14	2.66	6	2.66	5.71	5.85	2.96	5.71
ENSMUSG00000002109_Ddb2	4.18	5.71	2.44	4.18	3.49	3.14	5.93	3.49
ENSMUSG00000002111_Spi1	0.13	1.07	0	0.13	5.09	7.43	3.17	5.09
ENSMUSG00000002129_Sf3a1	47.4	35.37	23.66	35.37	21.96	28.53	44.27	28.53
ENSMUSG00000002147_Stat6	2.28	1.21	2.16	2.16	4.83	1.49	3.44	3.44
ENSMUSG00000002190_Clgn	6.07	5.37	3.02	5.37	4.25	6.12	9.74	6.12
ENSMUSG00000002204_Napsa	0.55	0.63	0.54	0.55	2.37	9.02	1.13	2.37
ENSMUSG00000002205_Vrk3	9.35	9.35	6.18	9.35	10.48	16.95	20.54	16.95
ENSMUSG00000002210_Smg9	13.74	9.37	10.71	10.71	19.81	44.69	26.7	26.7
ENSMUSG00000002221_Paxip1	11.67	16.13	13.66	13.66	20.57	14.05	37.42	20.57
ENSMUSG00000002222_Rmnd5a	43.16	41.32	34.31	41.32	42.66	32.76	26.7	32.76
ENSMUSG00000002227_Mov10	0.5	2.92	0.68	0.68	7.19	8.27	11.72	8.27
ENSMUSG00000002228_Ppm1j	12.37	2.47	0	2.47	14.25	25.75	36.42	25.75
ENSMUSG00000002233_Rhoc	7.89	9.77	5.17	7.89	9.56	30.44	14.45	14.45
ENSMUSG00000002240_Prr27	0	2.2	2.66	2.2	2.87	6.69	2.6	2.87
ENSMUSG00000002249_Tead3	1.51	0.6	4.9	1.51	1.13	3.95	1.29	1.29
ENSMUSG00000002250_Ppard	12.59	9.66	7.93	9.66	7.47	14.33	14.37	14.33
ENSMUSG00000002257_Def6	0.56	0.71	0.18	0.56	0.39	1.03	2.8	1.03
ENSMUSG00000002265_Peg3	147.71	109.56	122.76	122.76	145.11	118.04	149.33	145.11
ENSMUSG00000002266_Zim1	2.18	4.11	1.67	2.18	6.26	8.28	7.54	7.54
ENSMUSG00000002274_Metrn	30.91	23.62	26.89	26.89	25.44	19.54	33.89	25.44
ENSMUSG00000002279_Lmf1	8.23	7.7	5.89	7.7	13.78	34.21	23.54	23.54
ENSMUSG00000002280_Narfl	7.92	8.42	4.73	7.92	18.58	31.35	13.24	18.58
ENSMUSG00000002289_Angptl4	1.98	1.46	0.89	1.46	4.34	4.54	6.12	4.54
ENSMUSG00000002297_Dbf4	1.04	5.62	2.03	2.03	5.83	15.42	8.17	8.17
ENSMUSG00000002307_Daxx	17.81	5.7	11.06	11.06	14.39	39.46	32.48	32.48
ENSMUSG00000002308_Cd320	3.45	5.58	7.91	5.58	9.29	9.47	9.41	9.41
ENSMUSG00000002319_Ipo4	23.91	12.24	27.71	23.91	10.75	22.49	24.43	22.49
ENSMUSG00000002320_Tm9sf1	35.19	16.1	17.39	17.39	16.2	35.49	30.13	30.13
ENSMUSG00000002324_Rec8	1.79	1.47	0	1.47	4.97	19.31	9.8	9.8
ENSMUSG00000002325_Irf9	3.28	5.06	5.23	5.06	14.59	7.54	8.23	8.23
ENSMUSG00000002326_Gmpr2	5.11	7.28	6.33	6.33	7.16	19.04	5.4	7.16
ENSMUSG00000002329_Mdp1	8.14	10.52	13.01	10.52	9.43	13.21	11.37	11.37
ENSMUSG00000002332_Dhrs1	25.65	18.44	17.75	18.44	14.73	18.16	31.28	18.16
ENSMUSG00000002341_Ncan	2.46	2.02	2.05	2.05	2.2	3.97	4.8	3.97
ENSMUSG00000002342_Tmem161a	11.89	8.95	18.13	11.89	9.2	35.6	18.12	18.12
ENSMUSG00000002343_Armc6	3.71	4.67	3.07	3.71	6.24	7.09	22.13	7.09
ENSMUSG00000002345_Borcs8	23.23	25.8	21.93	23.23	12.23	25.02	9.45	12.23
ENSMUSG00000002346_Slc25a42	5.66	5.22	11.46	5.66	5.61	14.78	16.18	14.78
ENSMUSG00000002365_Snx9	9.6	8.17	12.18	9.6	9.11	9.17	5.92	9.11
ENSMUSG00000002372_Ranbp3	12.9	10.56	8.94	10.56	10.46	17.09	13.22	13.22
ENSMUSG00000002379_Ndufa11	20.7	16.46	13.78	16.46	15.07	22.12	10.65	15.07
ENSMUSG00000002384_Bmp8b	0.17	0.36	0	0.17	0	1.89	5.54	1.89
ENSMUSG00000002393_Nr2f6	10.45	6.97	4.25	6.97	5.66	8.11	17.25	8.11
ENSMUSG00000002395_Use1	44.03	45.74	22.03	44.03	46.42	59.34	40.27	46.42
ENSMUSG00000002396_Ocel1	2.68	3.42	3	3	3.79	12.33	7.95	7.95
ENSMUSG00000002409_Dyrk1b	8.89	5.64	8.32	8.32	5.71	4.69	7.2	5.71
ENSMUSG00000002413_Braf	37.98	33.09	36.31	36.31	35.93	49.15	46.27	46.27
ENSMUSG00000002416_Ndufb2	82.78	51.59	62.46	62.46	62.12	87.6	53.91	62.12
ENSMUSG00000002428_Hltf	22.76	24.18	18.11	22.76	28.31	18.56	28.7	28.31
ENSMUSG00000002455_Prpf6	39.26	32.08	49.44	39.26	46.9	52.43	49.88	49.88
ENSMUSG00000002458_Rgs19	3.92	6.77	10.08	6.77	5.37	7.06	2.3	5.37
ENSMUSG00000002459_Rgs20	19.38	16.4	17.77	17.77	12.53	6.28	14.57	12.53
ENSMUSG00000002475_Abhd3	71.3	68.74	51.95	68.74	73.01	51.45	43.72	51.45
ENSMUSG00000002477_Snrpd1	71.63	78.62	65.89	71.63	75.69	51.59	54.31	54.31
ENSMUSG00000002486_Tchp	17.43	10.61	12.84	12.84	26.81	33.94	26.19	26.81
ENSMUSG00000002489_Tiam1	34.85	23.73	31.76	31.76	30.86	51.4	38.64	38.64
ENSMUSG00000002496_Tsc2	14.76	10.37	11.45	11.45	11.87	8.9	7.59	8.9
ENSMUSG00000002500_Rpl3l	0	0	0	0	0.95	0	0	0
ENSMUSG00000002504_Slc9a3r2	14.77	16.42	15.58	15.58	10.79	13.58	13.66	13.58
ENSMUSG00000002524_Puf60	74.74	46.06	63.33	63.33	37.25	65.71	65.61	65.61
ENSMUSG00000002546_Golga2	50.54	37.82	75.32	50.54	67.19	72.32	57.48	67.19
ENSMUSG00000002550_Uck1	11.11	10.11	11.14	11.11	9.36	14.18	18.34	14.18
ENSMUSG00000002565_Scin	0.85	1.99	1.8	1.8	3.75	8.26	7.12	7.12
ENSMUSG00000002578_Ikzf4	2.53	3.45	2.94	2.94	2.98	9.85	20.31	9.85
ENSMUSG00000002580_Mien1	22.85	30.56	23.12	23.12	7.19	23.22	23.67	23.22
ENSMUSG00000002588_Pon1	0	0.74	0	0	2.98	0.79	2.16	2.16
ENSMUSG00000002602_Axl	27.27	13.05	35.95	27.27	13.69	26.62	28.16	26.62
ENSMUSG00000002603_Tgfb1	2.65	9.93	0.19	2.65	3.06	16.19	3.93	3.93
ENSMUSG00000002608_Ccdc97	12.5	11.71	14.57	12.5	12.02	18.16	14.91	14.91
ENSMUSG00000002617_Zfp40	12.64	11.8	9.24	11.8	28.6	3.83	15.06	15.06
ENSMUSG00000002625_Akap8l	54.43	42.19	49.79	49.79	50.63	60.3	68.24	60.3
ENSMUSG00000002633_Shh	6.49	7.47	4.94	6.49	8.19	4.75	4.55	4.75
ENSMUSG00000002635_Pdcd2l	8.78	9.34	5.95	8.78	7.07	15.8	28.02	15.8
ENSMUSG00000002658_Gtf2f1	56.2	35.11	50.64	50.64	35.45	66.04	61.27	61.27
ENSMUSG00000002660_Clpp	20.93	17.01	23.52	20.93	14.27	12.68	11.51	12.68
ENSMUSG00000002661_Alkbh7	15.34	8.05	22.77	15.34	9.95	14.8	30.28	14.8
ENSMUSG00000002664_Pspn	0	0	9.59	0	2.78	7.63	0	2.78
ENSMUSG00000002668_Dennd1c	0	0.21	0.32	0.21	0	0.46	1.25	0.46
ENSMUSG00000002679_Med6	20.32	16.54	40.24	20.32	9.95	9.68	4.41	9.68
ENSMUSG00000002688_Prkd1	3.68	2.59	2.57	2.59	2.71	3.28	4.89	3.28
ENSMUSG00000002699_Lcp2	0.4	0.85	0	0.4	1.88	5.91	4.23	4.23
ENSMUSG00000002718_Cse1l	33.79	31.05	59.67	33.79	42.68	43.19	32.98	42.68
ENSMUSG00000002728_Naa20	81.75	64.94	41.61	64.94	47.52	37.76	28.1	37.76
ENSMUSG00000002731_Prkra	7.56	7.82	7.84	7.82	14.57	8.76	11.84	11.84
ENSMUSG00000002732_Fkbp7	3.34	7.81	0.56	3.34	12.08	10.95	24.95	12.08
ENSMUSG00000002733_Plekha3	17.56	12.13	18.96	17.56	13.78	14.9	18.12	14.9
ENSMUSG00000002741_Ykt6	12.53	12.11	13.55	12.53	9.99	17.44	16.16	16.16
ENSMUSG00000002748_Baz1b	67.54	64.09	66.64	66.64	74.97	73.37	91.24	74.97
ENSMUSG00000002763_Pex6	6.95	5.11	4.56	5.11	4.31	8.08	3.31	4.31
ENSMUSG00000002767_Mrpl2	25.65	10.61	14.94	14.94	11.48	17.75	15.67	15.67
ENSMUSG00000002768_Mea1	38.91	33.75	46.43	38.91	40.76	53.01	42.8	42.8
ENSMUSG00000002769_Gnmt	0	1.17	0.44	0.44	2.16	4.86	2.2	2.2
ENSMUSG00000002771_Grin2d	2.32	1.87	1.14	1.87	1.55	3.07	3.83	3.07
ENSMUSG00000002778_Kdelr1	10.54	9.96	9.48	9.96	11.49	5.63	5.48	5.63
ENSMUSG00000002781_Tmem143	4.4	2.98	3.38	3.38	8.61	5.97	3.7	5.97
ENSMUSG00000002791_Pdxk-ps	0.33	0.68	0.86	0.68	1.88	5.19	5.03	5.03
ENSMUSG00000002797_Ggct	20.67	38.35	28.38	28.38	19.94	27.04	30.2	27.04
ENSMUSG00000002799_Jag2	1.86	0.38	1.24	1.24	1.26	3.6	1.89	1.89
ENSMUSG00000002803_Btbd6	7.26	4.73	4.16	4.73	6.93	9.61	7.83	7.83
ENSMUSG00000002804_Nudt14	5.86	4.14	6.27	5.86	2.66	0	0	0
ENSMUSG00000002808_Epdr1	29.55	22.78	18.39	22.78	26.16	14.16	19.3	19.3
ENSMUSG00000002812_Flii	30.75	18.67	19.35	19.35	28.39	33.99	30.31	30.31
ENSMUSG00000002814_Top3a	2.48	2.29	2.5	2.48	7.67	9.2	6.62	7.67
ENSMUSG00000002820_Atg4d	3.25	3.63	7.65	3.63	2.51	4.11	5.38	4.11
ENSMUSG00000002825_Qtrt1	2.34	0.87	0	0.87	1.43	0.95	2.59	1.43
ENSMUSG00000002831_Plin4	0.91	1.23	0.93	0.93	0.73	2.12	3.41	2.12
ENSMUSG00000002833_Hdgfrp2	32.91	24.52	35.61	32.91	26.3	45.26	34.75	34.75
ENSMUSG00000002835_Chaf1a	2.18	0.32	0.12	0.32	2.48	5.84	3.62	3.62
ENSMUSG00000002844_Adprh	36.73	21.21	20.84	21.21	17.97	19.26	18.89	18.89
ENSMUSG00000002845_Tmem39a	10.91	8.43	2.98	8.43	14.22	17.53	11.93	14.22
ENSMUSG00000002846_Timmdc1	18.42	13.17	17.22	17.22	15.77	17.85	9.51	15.77
ENSMUSG00000002847_Pla1a	0	0	0	0	0.91	0.6	0	0.6
ENSMUSG00000002870_Mcm2	3.87	7.16	3.79	3.87	5.22	24.36	16.85	16.85
ENSMUSG00000002871_Tpra1	24.27	8.83	16.16	16.16	17.98	65.95	16.61	17.98
ENSMUSG00000002881_Nab1	40.08	26.26	26.7	26.7	26.62	19.36	23.74	23.74
ENSMUSG00000002885_Adgre5	1.28	1.46	2.16	1.46	2.2	11.04	1.33	2.2
ENSMUSG00000002897_Il17ra	4.76	2.79	3.47	3.47	4.71	6.6	7.78	6.6
ENSMUSG00000002900_Lamb1	15.47	14.89	11.5	14.89	18.92	40.31	22.2	22.2
ENSMUSG00000002908_Kcnn1	1.38	2.03	0.58	1.38	2.95	7.23	2.65	2.95
ENSMUSG00000002910_Arrdc2	1.97	1.38	0	1.38	0.76	2.51	4.1	2.51
ENSMUSG00000002930_Ppp1r17	431.36	390.39	315.44	390.39	387.3	267	236.97	267
ENSMUSG00000002944_Cd36	0.2	0	0	0	3.04	0	2.86	2.86
ENSMUSG00000002948_Map2k7	32.93	29.23	48.05	32.93	34.7	36.08	31.96	34.7
ENSMUSG00000002949_Timm44	63.96	54.82	44.53	54.82	55.37	53.66	67.69	55.37
ENSMUSG00000002957_Ap2a2	54.23	44.22	34.21	44.22	38.65	40.1	36.04	38.65
ENSMUSG00000002963_Pnkp	6.07	15.19	5.66	6.07	4.24	20.68	5.65	5.65
ENSMUSG00000002968_Med25	26.8	39.12	17.26	26.8	14.86	45.49	24.91	24.91
ENSMUSG00000002980_Bcam	2.09	0.88	1.78	1.78	2.38	1.71	0.65	1.71
ENSMUSG00000002981_Clptm1	27.48	22.37	24.59	24.59	26.36	36.47	16.71	26.36
ENSMUSG00000002983_Relb	1.37	0.73	1.49	1.37	2.99	16.04	9.84	9.84
ENSMUSG00000002984_Tomm40	32.26	22.42	18.74	22.42	22.41	42.11	30.1	30.1
ENSMUSG00000002985_Apoe	1700.43	1009.18	1170.8	1170.8	753.34	1315.93	993.79	993.79
ENSMUSG00000002992_Apoc2	0	0	0	0	2.1	8.56	0	2.1
ENSMUSG00000002996_Hbp1	19.75	18.99	18.31	18.99	14.79	23.01	9.33	14.79
ENSMUSG00000002997_Prkar2b	15.73	10.82	11.01	11.01	11.57	11.61	7.78	11.57
ENSMUSG00000003031_Cdkn1b	31.21	21.76	26.07	26.07	19.26	23.58	17.3	19.26
ENSMUSG00000003032_Klf4	1.31	1.72	0.91	1.31	3.71	7.17	7.72	7.17
ENSMUSG00000003033_Ap1m1	35.38	31.22	36.57	35.38	36.56	36.15	43.81	36.56
ENSMUSG00000003037_Rab8a	20.28	29.67	13.19	20.28	20.8	10.14	15.69	15.69
ENSMUSG00000003038_Hmgn2	49.34	44.32	43.59	44.32	37.54	64.69	54.5	54.5
ENSMUSG00000003039_Fam32a	42.27	35.42	55.05	42.27	39.95	101.02	81.59	81.59
ENSMUSG00000003051_Elf3	0.55	0.77	0	0.55	0.94	1.25	8.5	1.25
ENSMUSG00000003053_Cyp2c29	0	1.12	0.42	0.42	2.15	3.66	1.11	2.15
ENSMUSG00000003062_Stard3nl	9.36	16.46	8.94	9.36	15.65	18.1	21.33	18.1
ENSMUSG00000003068_Stk11	30.56	18.77	35.65	30.56	29.44	22.92	21.74	22.92
ENSMUSG00000003070_Efna2	2.18	2.28	0.76	2.18	2.92	2.76	4.52	2.92
ENSMUSG00000003072_Atp5d	91.25	61.88	104.74	91.25	94.81	49.72	54.52	54.52
ENSMUSG00000003099_Ppp5c	44.88	30.23	26.81	30.23	52.36	46.04	69.89	52.36
ENSMUSG00000003119_Cdk12	25.21	17.26	16.72	17.26	25.36	31.83	33.93	31.83
ENSMUSG00000003123_Lipe	2.97	3.95	5.04	3.95	6.37	15.34	13.17	13.17
ENSMUSG00000003131_Pafah1b2	67.69	54.54	63.26	63.26	50.82	57.37	41.47	50.82
ENSMUSG00000003134_Tbc1d8	10.85	7.42	4.46	7.42	4.07	5.28	11.1	5.28
ENSMUSG00000003135_Cnot11	6.89	6.59	4.48	6.59	10.26	6.13	7.86	7.86
ENSMUSG00000003153_Slc2a3	34.01	33.98	32.46	33.98	31.25	33.93	37.9	33.93
ENSMUSG00000003154_Foxj2	16.05	8.82	12.79	12.79	7.5	10.93	14.03	10.93
ENSMUSG00000003161_Sri	38.27	23.45	31.07	31.07	35.96	33.33	49.22	35.96
ENSMUSG00000003166_Dgcr2	20.49	12.37	19.96	19.96	16.67	16.33	20.25	16.67
ENSMUSG00000003184_Irf3	22.06	11.56	25.05	22.06	30.06	39.52	35.4	35.4
ENSMUSG00000003190_Bcl2l12	0.17	2.26	2.77	2.26	1.97	7.89	10.55	7.89
ENSMUSG00000003198_Zfp959	2.43	2.67	2.62	2.62	2.2	2.92	1.59	2.2
ENSMUSG00000003199_Mpnd	33.37	27.7	20.56	27.7	20.47	36.9	51.26	36.9
ENSMUSG00000003200_Sh3gl1	11.38	5.22	10.25	10.25	8.16	6.84	7.77	7.77
ENSMUSG00000003206_Ebi3	0.25	0	0	0	0	0	1.49	0
ENSMUSG00000003208_Ccdc94	8.58	6.61	4.33	6.61	6.48	6.71	6.52	6.52
ENSMUSG00000003226_Ranbp2	48.44	48.06	43.28	48.06	46.82	33.54	38.85	38.85
ENSMUSG00000003227_Edar	0	0.43	0	0	0.71	0.93	0.85	0.85
ENSMUSG00000003228_Grk5	8.84	7.9	8.45	8.45	6.53	10.8	9.82	9.82
ENSMUSG00000003233_Dvl3	27.72	20.87	26.29	26.29	22.86	22.13	27.13	22.86
ENSMUSG00000003234_Abcf3	26.46	20.39	14.54	20.39	18.23	25.91	47.29	25.91
ENSMUSG00000003235_Eif2b5	14.52	11.93	7.65	11.93	13.5	13.59	13.17	13.5
ENSMUSG00000003269_Cyth2	14.93	5.88	6.35	6.35	11.79	14.24	18.16	14.24
ENSMUSG00000003271_Sult2b1	0.51	0	0	0	0	3.41	0	0
ENSMUSG00000003273_Car11	17.5	13.88	11.32	13.88	13.18	27.87	18.44	18.44
ENSMUSG00000003279_Dlgap1	112.84	78.04	91.15	91.15	83.68	95.31	99.05	95.31
ENSMUSG00000003282_Plag1	1.58	1.93	1.47	1.58	5.31	6.79	4.85	5.31
ENSMUSG00000003283_Hck	0.25	0	0	0	1.28	1.69	2.31	1.69
ENSMUSG00000003299_Mrpl4	16.06	8.12	6.14	8.12	3.68	6.87	5.34	5.34
ENSMUSG00000003308_Keap1	12.48	8.66	8.26	8.66	10.03	20.42	13.69	13.69
ENSMUSG00000003309_Ap1m2	0	0	0	0	0	2.09	5.67	2.09
ENSMUSG00000003316_Glg1	98.15	76.37	87.66	87.66	73.91	71.75	64.75	71.75
ENSMUSG00000003341_Atp8b3	0	0.23	0	0	0.58	2.03	3.46	2.03
ENSMUSG00000003344_Btbd2	11.86	7.8	7.05	7.8	19.87	14.52	16.08	16.08
ENSMUSG00000003345_Csnk1g2	18.5	8.91	11.29	11.29	10.09	12.95	14.32	12.95
ENSMUSG00000003346_Abhd17a	22.99	10.8	17.2	17.2	17.53	23.09	22.88	22.88
ENSMUSG00000003348_Mob3a	2.62	0.71	1.78	1.78	3.75	0.89	0.87	0.89
ENSMUSG00000003352_Cacnb3	6.5	5	6.33	6.33	2.89	3.03	5.56	3.03
ENSMUSG00000003354_Ccdc65	0.97	1.16	0.87	0.97	1.9	3.15	0.86	1.9
ENSMUSG00000003355_Fkbp11	0.47	0	0	0	2.96	5.98	8.12	5.98
ENSMUSG00000003360_Ddx23	43.16	37.19	29.47	37.19	26.59	45.41	46.79	45.41
ENSMUSG00000003363_Pld3	22.89	17.31	35.81	22.89	7.78	24.22	18.99	18.99
ENSMUSG00000003378_Grik5	12.64	14.27	7.81	12.64	25.68	58.69	29.95	29.95
ENSMUSG00000003379_Cd79a	0	0	0	0	0.64	3.39	2.31	2.31
ENSMUSG00000003380_Rabac1	37.3	28.99	44.6	37.3	24.68	46.08	18.55	24.68
ENSMUSG00000003382_Etv3	13.52	11.7	6.65	11.7	15.06	19.82	17.96	17.96
ENSMUSG00000003402_Prkcsh	39.5	23.25	32.37	32.37	25.47	37.13	35.63	35.63
ENSMUSG00000003410_Elavl3	47.06	29.79	33.26	33.26	37.04	40.96	34.43	37.04
ENSMUSG00000003411_Rab3b	3.39	2.87	3.02	3.02	3.08	13.38	6.15	6.15
ENSMUSG00000003418_St8sia6	0.28	1.12	0	0.28	1.53	2.31	2.95	2.31
ENSMUSG00000003420_Fcgrt	6.28	6.35	3.84	6.28	3.65	6.93	5.67	5.67
ENSMUSG00000003421_Nosip	20.07	14.97	14.83	14.97	12.12	25.37	14.08	14.08
ENSMUSG00000003423_Pih1d1	1.87	1.67	2.11	1.87	5.19	1.18	0	1.18
ENSMUSG00000003429_Rps11	96.49	76.07	55.75	76.07	46.02	70.81	32.03	46.02
ENSMUSG00000003435_Supt5	46.15	27.66	33.33	33.33	36.43	62.56	60.82	60.82
ENSMUSG00000003436_Dll3	0.38	2.08	0	0.38	3.22	14.25	17.01	14.25
ENSMUSG00000003437_Paf1	133.06	119.81	126.15	126.15	84.51	240.15	240.55	240.15
ENSMUSG00000003438_Timm50	14.74	19.22	9.44	14.74	7.24	4.86	29.59	7.24
ENSMUSG00000003444_Med29	20.09	13.13	16.08	16.08	10.35	11.81	10.72	10.72
ENSMUSG00000003452_Bicd1	63.03	55.52	71.01	63.03	49.62	64.08	66.71	64.08
ENSMUSG00000003458_Ncstn	9.01	19.17	4.96	9.01	18.76	21.14	19.59	19.59
ENSMUSG00000003464_Pex19	42.36	27.53	56.87	42.36	19.18	78.1	42.66	42.66
ENSMUSG00000003469_Phyhip	73.53	67.95	76.72	73.53	46.78	67.51	55.16	55.16
ENSMUSG00000003476_Crhr2	0.34	3.54	1.25	1.25	8.44	18.79	2.28	8.44
ENSMUSG00000003477_Inmt	0	1.12	0	0	4.22	7.12	10.04	7.12
ENSMUSG00000003484_Cyp4f18	0	1.22	0	0	0	2.62	0	0
ENSMUSG00000003500_Impdh1	19.15	13.33	29.39	19.15	14.57	27.51	39.1	27.51
ENSMUSG00000003505_Psg18	0.78	6.21	1.17	1.17	7.82	24.55	17.45	17.45
ENSMUSG00000003518_Dusp3	15.02	11.42	10.15	11.42	10.2	20.67	20.76	20.67
ENSMUSG00000003526_Prodh	10.25	10.01	22.74	10.25	17.71	17.4	25.27	17.71
ENSMUSG00000003527_Dgcr14	7.54	5.96	2.25	5.96	5.24	10.19	5	5.24
ENSMUSG00000003528_Slc25a1	19.87	18.92	37.36	19.87	6.77	18.84	16.16	16.16
ENSMUSG00000003531_Dgcr6	40.91	24.47	16.72	24.47	30.87	15.92	17.63	17.63
ENSMUSG00000003534_Ddr1	11.76	6.73	7.54	7.54	7.95	8.1	32.24	8.1
ENSMUSG00000003541_Ier3	7.23	2.1	1.59	2.1	5.14	10.28	6.22	6.22
ENSMUSG00000003545_Fosb	0.48	2.16	0.54	0.54	2.85	13.53	14.8	13.53
ENSMUSG00000003546_Klc4	5.94	3.22	6.95	5.94	5.31	3.52	6.86	5.31
ENSMUSG00000003549_Ercc1	10.36	7.7	6.88	7.7	6.03	27.29	15.25	15.25
ENSMUSG00000003555_Cyp17a1	0.15	0	0.91	0.15	13.97	14.21	0.9	13.97
ENSMUSG00000003559_As3mt	4.1	4.1	1.19	4.1	5.69	1.37	1.87	1.87
ENSMUSG00000003573_Homer3	285.5	138.24	176.08	176.08	129.84	232.46	150.75	150.75
ENSMUSG00000003575_Crtc1	14.1	14.77	13.92	14.1	17.93	38.27	18.95	18.95
ENSMUSG00000003581_Rnf215	7.3	8.21	9.77	8.21	7.75	10.43	16.07	10.43
ENSMUSG00000003585_Sec14l2	5.63	4.13	6.63	5.63	11.22	36.29	5.11	11.22
ENSMUSG00000003604_Aven	8.07	7.35	5.66	7.35	12.61	9.73	22.15	12.61
ENSMUSG00000003617_Cp	3.01	6.82	13.94	6.82	13.78	6.08	16.59	13.78
ENSMUSG00000003623_Crot	18.68	17.72	10.98	17.72	25.43	15.82	31.92	25.43
ENSMUSG00000003644_Rps6ka1	12.87	12.67	7.28	12.67	9.84	32.41	10.16	10.16
ENSMUSG00000003657_Calb2	54.8	47.31	33.06	47.31	43.61	31.17	24.77	31.17
ENSMUSG00000003660_Snrnp200	70.42	48.79	45.03	48.79	44.88	55.21	61.66	55.21
ENSMUSG00000003662_Ciao1	91.34	37.44	46.33	46.33	41.69	34.04	39.61	39.61
ENSMUSG00000003665_Has1	1.86	2.58	2.34	2.34	3.83	1.69	3.08	3.08
ENSMUSG00000003680_Taf6l	9.71	9.82	12.87	9.82	10.58	12.54	13.5	12.54
ENSMUSG00000003721_Insig2	73.07	32.59	33.92	33.92	50.8	53.17	57.36	53.17
ENSMUSG00000003731_Kpna6	39.21	60.74	36.06	39.21	49.04	134.12	82.23	82.23
ENSMUSG00000003746_Man1a	11.34	10.78	6.29	10.78	10.03	5.88	13.36	10.03
ENSMUSG00000003752_Itpkc	2.89	4.85	1.26	2.89	6.48	6.58	10.93	6.58
ENSMUSG00000003762_Adck4	4.49	4.77	10.89	4.77	8.66	16.97	14.58	14.58
ENSMUSG00000003778_Brd8	85.29	54.05	59.17	59.17	70.45	80.75	85.33	80.75
ENSMUSG00000003779_Kif20a	0	0.17	0.48	0.17	0	0	0.47	0
ENSMUSG00000003808_Farsa	12.18	11.32	4.8	11.32	10.53	16.94	15.7	15.7
ENSMUSG00000003809_Gcdh	13.73	8.46	24.87	13.73	8.48	22.2	25.41	22.2
ENSMUSG00000003810_Mast2	19.31	25.1	30.5	25.1	35.5	27.37	26.59	27.37
ENSMUSG00000003812_Dnase2a	5.51	6.71	5.15	5.51	5.37	8.25	14.82	8.25
ENSMUSG00000003813_Rad23a	50.99	30.15	35.31	35.31	21.06	55.01	33.13	33.13
ENSMUSG00000003814_Calr	773.97	468.34	459.52	468.34	624.69	723.8	700.35	700.35
ENSMUSG00000003824_Syce2	3.88	3.83	0.77	3.83	3.77	9.71	15.19	9.71
ENSMUSG00000003847_Nfat5	48.69	43.03	39.52	43.03	45.71	32.83	50.76	45.71
ENSMUSG00000003848_Nob1	9.48	18.56	9.4	9.48	12.43	23.4	10.42	12.43
ENSMUSG00000003849_Nqo1	2.27	3.97	5.74	3.97	7.11	0.79	1.07	1.07
ENSMUSG00000003863_Ppfia3	15.36	8.99	10.82	10.82	10.4	12.83	10.62	10.62
ENSMUSG00000003865_Gys1	5.65	3.22	6.56	5.65	3.71	4.6	3.35	3.71
ENSMUSG00000003868_Ruvbl2	8.47	5.96	9.77	8.47	5.98	2.17	8.86	5.98
ENSMUSG00000003872_Lin7b	0.98	0.96	0.72	0.96	0	2.05	2.79	2.05
ENSMUSG00000003873_Bax	15.06	9.54	7.21	9.54	11.83	9.51	8.62	9.51
ENSMUSG00000003882_Il7r	0	0.49	0	0	1.34	1.78	3.87	1.78
ENSMUSG00000003923_Tfam	39.03	26.94	42.18	39.03	29.69	52.88	37.39	37.39
ENSMUSG00000003929_Zfp81	7.42	8.7	10.46	8.7	7.55	7.64	5.21	7.55
ENSMUSG00000003934_Efnb3	1.24	2.78	0.86	1.24	4.33	8.95	9.76	8.95
ENSMUSG00000003948_Mmd	13.25	14.42	14.21	14.21	18.34	18.7	16.61	18.34
ENSMUSG00000003949_Hlf	25.24	24.95	21.05	24.95	25.07	15.45	22.42	22.42
ENSMUSG00000003955_Fam162a	63.58	39.65	68.62	63.58	62.82	58.24	72.47	62.82
ENSMUSG00000003970_Rpl8	195.74	157.18	157.04	157.18	130.4	157	141.61	141.61
ENSMUSG00000003974_Grm3	15.8	12.84	13.97	13.97	18.13	8.62	18.91	18.13
ENSMUSG00000003992_Ssbp2	37.68	40.31	20.63	37.68	19.49	29.38	52.08	29.38
ENSMUSG00000004018_Fancl	2.74	0.81	3.6	2.74	2.24	2.2	0.58	2.2
ENSMUSG00000004031_Brinp2	14.8	13.81	10.36	13.81	13.8	30.68	17.29	17.29
ENSMUSG00000004032_Gstm5	42.13	57.07	41.82	42.13	51.84	26.71	9.69	26.71
ENSMUSG00000004035_Gstm7	5.11	3.07	4.08	4.08	6.11	11.49	2.46	6.11
ENSMUSG00000004038_Gstm3	0	0.44	0	0	0.72	2.87	1.3	1.3
ENSMUSG00000004040_Stat3	14.31	17.72	8.22	14.31	38.66	51.08	28.4	38.66
ENSMUSG00000004043_Stat5a	3.02	5.56	1.33	3.02	8.4	12.07	8.81	8.81
ENSMUSG00000004044_Ptrf	4.76	2.82	5.71	4.76	3.44	9.09	5.84	5.84
ENSMUSG00000004054_Map3k11	2.57	1.9	1.53	1.9	2.02	2.97	2.83	2.83
ENSMUSG00000004056_Akt2	73.38	41.2	57.09	57.09	43.03	69.05	55.99	55.99
ENSMUSG00000004069_Dnaja3	34.07	24.07	17.67	24.07	25.76	29.95	27.23	27.23
ENSMUSG00000004070_Hmox2	59.16	48.6	29.4	48.6	38.48	42.13	39.23	39.23
ENSMUSG00000004071_Cdip1	36.67	24.83	26.7	26.7	25.32	31.22	24.09	25.32
ENSMUSG00000004085_Zak	3.05	10.88	1.37	3.05	3.7	13.2	7.06	7.06
ENSMUSG00000004096_Cwc15	114.96	91.39	89.03	91.39	97.08	106.19	84.19	97.08
ENSMUSG00000004098_Col5a3	3.39	1.87	2.74	2.74	2.32	5.16	5.65	5.16
ENSMUSG00000004099_Dnmt1	15	13.08	13.31	13.31	12.26	12.77	15.67	12.77
ENSMUSG00000004100_Ppan	7.82	4.92	11.45	7.82	8.67	29.43	9.94	9.94
ENSMUSG00000004105_Angptl2	4.4	5.51	4.29	4.4	8.93	7.5	17.37	8.93
ENSMUSG00000004110_Cacna1e	23.99	28.02	24.04	24.04	34.89	39.99	36.05	36.05
ENSMUSG00000004113_Cacna1b	4.85	3.92	8.6	4.85	7.2	4.22	4.63	4.63
ENSMUSG00000004127_Trmt10a	22.81	22	14.39	22	22.98	56.05	7.6	22.98
ENSMUSG00000004151_Etv1	59.87	54.93	47.71	54.93	50.26	39.13	28.66	39.13
ENSMUSG00000004187_Kifc2	19.77	14.92	17.91	17.91	16.18	16.33	15.34	16.18
ENSMUSG00000004207_Psap	228.95	163.2	185.06	185.06	167.25	131.33	138.15	138.15
ENSMUSG00000004221_Ikbkg	16.28	18.04	19.24	18.04	17.75	14.9	21.27	17.75
ENSMUSG00000004231_Pax2	2.98	3.08	1.66	2.98	6.46	16.6	20.43	16.6
ENSMUSG00000004233_Wars2	6.36	5.21	5.51	5.51	4.23	12.32	8.5	8.5
ENSMUSG00000004263_Atn1	75.85	37.2	95.32	75.85	44.36	49.91	60.54	49.91
ENSMUSG00000004264_Phb2	22.58	23.57	21.04	22.58	17.85	19.67	29.44	19.67
ENSMUSG00000004266_Ptpn6	2.13	1.91	0	1.91	1.53	0.69	0	0.69
ENSMUSG00000004267_Eno2	150.53	99.59	116.18	116.18	91.97	86.06	117.51	91.97
ENSMUSG00000004268_Emg1	21.57	21.52	25.41	21.57	27.32	33.71	32.79	32.79
ENSMUSG00000004270_Lpcat3	13.12	14.54	11.13	13.12	7.77	23.97	12.04	12.04
ENSMUSG00000004285_Atp6v1f	200.2	161.4	191.01	191.01	135.48	340.24	217.06	217.06
ENSMUSG00000004296_Il12b	0	0.29	0	0	1.45	3.85	3.5	3.5
ENSMUSG00000004317_Clcn5	2.24	5.22	3.12	3.12	2.97	5.29	4.27	4.27
ENSMUSG00000004319_Clcn3	66.83	64.92	56.96	64.92	77.99	50.97	57.67	57.67
ENSMUSG00000004328_Hif3a	2.45	4.48	2.78	2.78	3.52	6.2	8.47	6.2
ENSMUSG00000004341_Gpx6	0	0	0	0	0.76	0	0	0
ENSMUSG00000004344_Gpx5	0.33	0.34	0	0.33	1.12	2.89	3.05	2.89
ENSMUSG00000004347_Pde1c	53.61	60.73	45.27	53.61	55.12	40.65	46.34	46.34
ENSMUSG00000004356_Utp20	5.34	4.97	4.78	4.97	4.79	4.46	5.58	4.79
ENSMUSG00000004359_Spic	0.22	1.01	0.18	0.22	3.47	6.03	5.81	5.81
ENSMUSG00000004360_9330159F19Rik	24.98	24.53	20.09	24.53	21.11	21.4	25.18	21.4
ENSMUSG00000004364_Cul3	134.19	138.1	115.86	134.19	127.19	168.47	233.64	168.47
ENSMUSG00000004366_Sst	2.59	1.24	0.94	1.24	1.95	13.21	14.34	13.21
ENSMUSG00000004371_Il11	0	0	0	0	1.84	1.83	4.99	1.84
ENSMUSG00000004383_Large	51.3	42.73	37.73	42.73	47.3	35.55	34.27	35.55
ENSMUSG00000004393_Ddx56	8.53	5.6	6.78	6.78	5.95	15.12	22.79	15.12
ENSMUSG00000004394_Tmed4	60.35	22.57	44.62	44.62	26.24	20.92	31.65	26.24
ENSMUSG00000004415_Col26a1	0.09	3.27	0	0.09	6.91	28.9	29.1	28.9
ENSMUSG00000004446_Bid	0.12	0.49	0.56	0.49	1.17	1.67	10.94	1.67
ENSMUSG00000004451_Ralb	14.09	8.93	7.16	8.93	14.85	11.8	11.09	11.8
ENSMUSG00000004455_Ppp1cc	98.43	70.13	98.83	98.43	76.15	99.82	106.14	99.82
ENSMUSG00000004460_Dnajb11	37.33	33.21	21.34	33.21	37.24	29.83	32.8	32.8
ENSMUSG00000004462_Tbccd1	5.3	6.83	4.86	5.3	6.77	4.27	2.91	4.27
ENSMUSG00000004473_Clec11a	1.59	3.51	2.65	2.65	3.78	7.69	7.86	7.69
ENSMUSG00000004500_Zfp324	3.09	1.9	2.33	2.33	2.84	3.4	3.65	3.4
ENSMUSG00000004508_Gab2	6.08	6.9	4.11	6.08	6.65	12.36	11.52	11.52
ENSMUSG00000004530_Coro1c	90.03	20.28	29.9	29.9	78.52	34.25	37.13	37.13
ENSMUSG00000004535_Tax1bp1	116.35	133.14	101.02	116.35	128.88	96.97	92.88	96.97
ENSMUSG00000004540_Psg17	0	0.77	0	0	1.27	2.81	7.65	2.81
ENSMUSG00000004542_Psg19	0.12	2.61	0.25	0.25	4.14	12.71	9.43	9.43
ENSMUSG00000004552_Ctse	0.17	0.6	0	0.17	1.64	3.71	0	1.64
ENSMUSG00000004558_Ndrg2	142.42	126.84	138.08	138.08	109.59	92.58	82.22	92.58
ENSMUSG00000004561_Mettl17	6.42	15.12	5.38	6.42	18.57	8.39	11.48	11.48
ENSMUSG00000004562_Arhgef40	22.05	18.31	21.94	21.94	24.38	73.2	94.53	73.2
ENSMUSG00000004565_Pnpla6	34.22	18.45	25.7	25.7	30.25	35.59	32.25	32.25
ENSMUSG00000004567_Mcoln1	70.07	57.86	52.4	57.86	48.27	115.98	186.45	115.98
ENSMUSG00000004568_Arhgef18	15.45	11.19	18.41	15.45	23.63	20.11	42.74	23.63
ENSMUSG00000004591_Pkn2	34.64	33.91	31.74	33.91	51.89	33.28	31.57	33.28
ENSMUSG00000004609_Cd33	0.29	8.06	1.32	1.32	5.75	13.59	8.87	8.87
ENSMUSG00000004610_Etfb	67.57	52	41.08	52	59.45	83.01	52.82	59.45
ENSMUSG00000004612_Nkg7	0	0	0	0	1.61	3.12	0	1.61
ENSMUSG00000004613_Lim2	0	0	0	0	0	3.18	0	0
ENSMUSG00000004626_Stxbp2	8.92	8.59	17.07	8.92	16.96	14.86	38.04	16.96
ENSMUSG00000004630_Pcp2	2556.71	987.88	1241.55	1241.55	805.09	1607.48	898.79	898.79
ENSMUSG00000004631_Sgce	14.24	15.36	24.65	15.36	15.31	16.74	19.42	16.74
ENSMUSG00000004633_Chn2	140.9	122.53	146.48	140.9	109.82	119.09	128.47	119.09
ENSMUSG00000004637_Wwox	33.45	25.91	27.18	27.18	37.92	75.03	41.53	41.53
ENSMUSG00000004642_Slbp	34.85	50.24	27.85	34.85	51.94	47.99	30.17	47.99
ENSMUSG00000004651_Tyr	0	2.86	0.32	0.32	2.24	9.35	3.43	3.43
ENSMUSG00000004654_Ghrhr	0	0	0	0	1.02	6.2	3.08	3.08
ENSMUSG00000004655_Aqp1	0	0.2	0	0	1	2.64	1.8	1.8
ENSMUSG00000004661_Arid3b	1.2	3.1	2.11	2.11	5.64	10.6	16.1	10.6
ENSMUSG00000004665_Cnn2	2.67	1.96	0	1.96	2.5	4.72	1.93	2.5
ENSMUSG00000004667_Polr2e	17	11.5	23.15	17	16.92	14.03	13.17	14.03
ENSMUSG00000004668_Abca13	0.42	1.53	0.19	0.42	1.94	3.98	4.77	3.98
ENSMUSG00000004677_Myo9b	5.17	3.99	4.22	4.22	4.21	5.48	10.82	5.48
ENSMUSG00000004698_Hdac9	6.67	5.89	7.24	6.67	8.81	4.3	3.8	4.3
ENSMUSG00000004707_Ly9	0.51	0.51	0	0.51	2.08	3.85	1.53	2.08
ENSMUSG00000004709_Cd244	0	1.89	1.61	1.61	2.46	4.65	7.51	4.65
ENSMUSG00000004730_Adgre1	0.32	0.83	1.09	0.83	1.06	3.65	2.49	2.49
ENSMUSG00000004748_Mtfp1	13.73	10.5	17.32	13.73	17.44	31.14	31.29	31.14
ENSMUSG00000004768_Rab23	54.05	31.93	44.17	44.17	41.45	80.89	79.93	79.93
ENSMUSG00000004771_Rab11a	100.42	98.6	91.64	98.6	115.58	48.86	111.07	111.07
ENSMUSG00000004788_Eif2b2	62.88	15.36	22.3	22.3	11.07	49.27	23.57	23.57
ENSMUSG00000004789_Dlst	54.23	36.5	33.32	36.5	39.27	39.09	37.99	39.09
ENSMUSG00000004791_Pgf	0.34	0.35	0	0.34	1.16	3.08	4.2	3.08
ENSMUSG00000004798_Ulk2	14.69	14.02	21.46	14.69	20.27	12.31	12.52	12.52
ENSMUSG00000004814_Ccl24	0	0.45	0	0	0.73	3.89	2.65	2.65
ENSMUSG00000004815_Dgkq	11.58	6.78	8.1	8.1	9.56	13.63	17.52	13.63
ENSMUSG00000004821_Tmed11	0	0	0	0	0	0	0	0
ENSMUSG00000004837_Grap	0.16	1	0	0.16	2.74	1.46	2.98	2.74
ENSMUSG00000004842_Pou1f1	0	3.92	2.24	2.24	5.94	9.35	11.54	9.35
ENSMUSG00000004843_Chmp2b	24.82	20.88	30.2	24.82	23.54	20.83	21.29	21.29
ENSMUSG00000004846_Plod3	6.81	5.79	5.63	5.79	6.69	11.18	24.7	11.18
ENSMUSG00000004849_Ap1s1	24.38	28.49	20.53	24.38	26.34	49.19	31.67	31.67
ENSMUSG00000004864_Mapk13	1.4	0	0	0	1.34	0	0	0
ENSMUSG00000004865_Srpk1	16.6	16.22	30.67	16.6	29.69	24.87	56.96	29.69
ENSMUSG00000004872_Pax3	10.01	7.74	6.94	7.74	9.5	10.95	13.29	10.95
ENSMUSG00000004880_Lbr	4.03	12.05	6.46	6.46	10.72	26.65	17.98	17.98
ENSMUSG00000004885_Crabp2	0	2.42	2.03	2.03	3.88	22.29	18.45	18.45
ENSMUSG00000004891_Nes	4	2.89	1.74	2.89	6.19	11.63	13.64	11.63
ENSMUSG00000004892_Bcan	63.54	51.55	59.3	59.3	64.95	75.2	79.25	75.2
ENSMUSG00000004894_Hapln2	0.65	0.96	2.76	0.96	0.75	4.49	4.08	4.08
ENSMUSG00000004895_Prcc	10.6	9.26	15.93	10.6	12.29	10.67	12.25	12.25
ENSMUSG00000004896_Rrnad1	10.82	9.46	7.76	9.46	14.53	20.45	15.56	15.56
ENSMUSG00000004897_Hdgf	98.11	63.06	71.1	71.1	59.04	153.98	173.69	153.98
ENSMUSG00000004902_Slc25a18	51.02	29.4	26.97	29.4	24.9	31.78	24.63	24.9
ENSMUSG00000004929_Thop1	9.29	11.89	7.9	9.29	14.81	19.18	32.45	19.18
ENSMUSG00000004931_Apba3	3.19	2.56	3.68	3.19	0.84	6.72	7.63	6.72
ENSMUSG00000004933_Matk	6.06	5.85	12.31	6.06	5.78	14.42	9.66	9.66
ENSMUSG00000004934_Pias4	11.11	5.78	7.48	7.48	16.03	20.15	16.99	16.99
ENSMUSG00000004936_Map2k1	49.16	36.28	32.49	36.28	36.82	26.51	33.29	33.29
ENSMUSG00000004937_Sgta	22.26	19.6	24.62	22.26	13.18	14.47	27.11	14.47
ENSMUSG00000004939_Nmrk2	0	0.76	0	0	2.45	0.65	0.89	0.89
ENSMUSG00000004945_Tmem242	18.02	20.33	19	19	29.37	16.33	33.33	29.37
ENSMUSG00000004947_Dtx2	4.69	1.72	2.66	2.66	5.23	3.98	3.78	3.98
ENSMUSG00000004948_Zp3	0.21	0	0	0	2.14	0.95	2.58	2.14
ENSMUSG00000004951_Hspb1	9.9	2.93	8.82	8.82	4.76	6.91	0	4.76
ENSMUSG00000004952_Rasa4	9.97	11.2	4.48	9.97	18.85	10.84	21.33	18.85
ENSMUSG00000004961_Syt5	1.21	1.58	5.96	1.58	0.52	7.98	7.08	7.08
ENSMUSG00000004980_Hnrnpa2b1	542.23	452.55	435.96	452.55	498.23	409.4	450.89	450.89
ENSMUSG00000004988_Fxyd4	1.16	3.05	4.49	3.05	1.61	5.38	12.58	5.38
ENSMUSG00000004994_Ccdc130	11.6	7.5	17.76	11.6	6.19	18.21	16.89	16.89
ENSMUSG00000004996_Mri1	1.51	2.64	1.55	1.55	8.43	4.9	7.32	7.32
ENSMUSG00000005034_Prkacb	58.21	64.39	35.57	58.21	42.63	29.16	48.56	42.63
ENSMUSG00000005043_Sgsh	1.78	3.97	3.19	3.19	2.17	4.95	4.38	4.38
ENSMUSG00000005045_Chd5	21.27	15.61	4.95	15.61	14.1	11.77	27.09	14.1
ENSMUSG00000005054_Cstb	52.55	35.85	54.3	52.55	35.1	18.49	25.09	25.09
ENSMUSG00000005057_Sh2b2	2.35	2.48	1.45	2.35	14.74	21.24	14.53	14.74
ENSMUSG00000005069_Pex5	8.8	5.88	8.6	8.6	8.66	15	11.08	11.08
ENSMUSG00000005078_Jkamp	17.08	21.82	13.03	17.08	18.78	24.29	6.42	18.78
ENSMUSG00000005087_Cd44	1.48	1.54	2.51	1.54	6.73	11.1	11.1	11.1
ENSMUSG00000005089_Slc1a2	372.8	312.98	310.41	312.98	262.3	252.68	281.79	262.3
ENSMUSG00000005102_Eif2ak4	4.86	6.65	3.63	4.86	3.35	12.63	8.1	8.1
ENSMUSG00000005103_Wdr1	61.87	65.16	69.26	65.16	77.26	105.04	83.67	83.67
ENSMUSG00000005107_Slc2a9	0.08	5.09	5.81	5.09	13.88	4.4	8.23	8.23
ENSMUSG00000005124_Wisp1	1.23	0.97	0.83	0.97	3	1.92	8.09	3
ENSMUSG00000005125_Ndrg1	7.54	4.75	4.04	4.75	6.85	17.1	20.16	17.1
ENSMUSG00000005131_4930550C14Rik	0.92	0.47	0	0.47	0	2.05	2.79	2.05
ENSMUSG00000005142_Man2b1	3.92	3.07	4.29	3.92	3.14	5.44	5.65	5.44
ENSMUSG00000005148_Klf5	0.15	4.18	0	0.15	4.75	18.92	13.37	13.37
ENSMUSG00000005150_Wdr83	7.07	10.22	11.47	10.22	4.4	19.57	10.95	10.95
ENSMUSG00000005161_Prdx2	137.16	98.18	82.7	98.18	144.96	155.63	103.12	144.96
ENSMUSG00000005198_Polr2a	28.43	23.58	30.48	28.43	47.29	59.04	45.73	47.29
ENSMUSG00000005202_Shbg	0	0	0	0	0	0.87	0	0
ENSMUSG00000005204_Senp3	35.34	16.75	18.4	18.4	51.57	26.04	50.84	50.84
ENSMUSG00000005220_Corin	10.15	9.78	8.63	9.78	10.66	7.22	6.63	7.22
ENSMUSG00000005225_Plekha8	5.57	5.68	5.74	5.68	7.42	2.94	8.93	7.42
ENSMUSG00000005232_G6pc2	0	1.65	0	0	0.52	3.46	0	0.52
ENSMUSG00000005233_Spc25	0.77	0.37	1.08	0.77	4.31	1.74	6.74	4.31
ENSMUSG00000005237_Dnah2	0.37	3.99	4.09	3.99	4.39	15.68	34.1	15.68
ENSMUSG00000005251_Ripk4	0	0.29	0.11	0.11	0.48	2.56	1.74	1.74
ENSMUSG00000005262_Ufd1l	38.38	28.57	31.73	31.73	26.32	41.02	43.55	41.02
ENSMUSG00000005267_Zfp287	10.23	9.14	8.56	9.14	12.19	13.05	21.43	13.05
ENSMUSG00000005268_Prlr	0.55	4.3	0.7	0.7	10.6	8.63	6.13	8.63
ENSMUSG00000005299_Letm1	27.36	24.19	27.21	27.21	28.32	34.48	37.45	34.48
ENSMUSG00000005312_Ubqln1	86.17	46.41	66.18	66.18	40.72	71.6	40.68	40.72
ENSMUSG00000005320_Fgfr4	0	0.31	0	0	3.18	6.09	11.93	6.09
ENSMUSG00000005338_Cadm3	83.87	72.11	97.82	83.87	67.08	45.73	72.09	67.08
ENSMUSG00000005339_Fcer1a	0	0	0	0	0	1.69	0	0
ENSMUSG00000005354_Txn2	45.28	33.32	42.76	42.76	42.31	40.59	26.52	40.59
ENSMUSG00000005355_Casp14	0.22	0.92	1.21	0.92	3.4	7.52	15.71	7.52
ENSMUSG00000005357_Slc1a6	198.71	114	96.31	114	102.64	166.58	102.37	102.64
ENSMUSG00000005360_Slc1a3	1784.67	1280.7	1174.89	1280.7	911.06	1377.87	910.28	911.06
ENSMUSG00000005362_Crbn	47.06	58.62	34.93	47.06	57.93	46.37	40.91	46.37
ENSMUSG00000005364_Il5ra	0	1.65	0.18	0.18	2.72	3.42	3.51	3.42
ENSMUSG00000005370_Msh6	11.56	9.62	7.54	9.62	11.17	12.39	17.61	12.39
ENSMUSG00000005371_Fbxo11	65.52	77.4	54.63	65.52	65.08	63.08	102.31	65.08
ENSMUSG00000005373_Mlxipl	0.83	4.84	0.11	0.83	7.42	15.82	11.33	11.33
ENSMUSG00000005374_Tbl2	8.63	5.82	11.8	8.63	7.53	6.45	9.26	7.53
ENSMUSG00000005378_Wbscr22	11.14	17.62	5.34	11.14	14.45	41.1	2.38	14.45
ENSMUSG00000005397_Nid1	6.02	4.59	5.1	5.1	6.65	5.49	6.98	6.65
ENSMUSG00000005410_Mcm5	1.29	0.76	1.83	1.29	0.75	1.33	0.45	0.75
ENSMUSG00000005413_Hmox1	4.64	2.78	3.9	3.9	7.22	10.74	4.01	7.22
ENSMUSG00000005417_Mprip	231.82	175.82	172.51	175.82	179.8	167.39	173.37	173.37
ENSMUSG00000005442_Cic	73.72	38.74	64.14	64.14	52.87	84.51	78.48	78.48
ENSMUSG00000005447_Pafah1b3	10.22	1.01	0	1.01	7.54	13.24	9.83	9.83
ENSMUSG00000005465_Il27ra	0	0.2	0	0	0.98	0.43	1.18	0.98
ENSMUSG00000005469_Prkaca	62.01	29.16	47.41	47.41	29.62	43.33	47.95	43.33
ENSMUSG00000005470_Asf1b	0	3.49	0.93	0.93	3.82	5.37	6.93	5.37
ENSMUSG00000005474_Myl10	0	0	0	0	3.21	3.49	2.94	3.21
ENSMUSG00000005481_Ddx39	4.07	4.7	4.57	4.57	8.32	11.24	9.82	9.82
ENSMUSG00000005483_Dnajb1	14.26	13.25	10.01	13.25	12.49	13.45	11.28	12.49
ENSMUSG00000005493_Msh4	0.1	3.07	0	0.1	4.62	4.9	5.27	4.9
ENSMUSG00000005501_Usp40	14.02	13.52	13.43	13.52	22.43	12.45	18.98	18.98
ENSMUSG00000005503_Evx1	0.17	0.73	0.28	0.28	2.11	2.79	6.9	2.79
ENSMUSG00000005505_Kbtbd4	12.66	10.28	14.18	12.66	11.49	32.44	9.76	11.49
ENSMUSG00000005506_Celf1	56.79	50.55	40.11	50.55	29.29	65.32	44.91	44.91
ENSMUSG00000005510_Ndufs3	102.54	133.23	107.55	107.55	74	112.62	96.81	96.81
ENSMUSG00000005514_Por	34.31	30.27	27.83	30.27	27.62	40.46	59.81	40.46
ENSMUSG00000005533_Igf1r	17.7	21.22	23.39	21.22	22.53	24.21	32.27	24.21
ENSMUSG00000005534_Insr	15.62	11.2	11.59	11.59	22.45	13.61	19.74	19.74
ENSMUSG00000005540_Fcer2a	1.12	2.76	4.98	2.76	4.04	7.85	13.94	7.85
ENSMUSG00000005547_Cyp2a5	0.13	0.81	0	0.13	2.08	4	4.2	4
ENSMUSG00000005553_Atp4a	0	0.2	0	0	2.38	15.88	1.05	2.38
ENSMUSG00000005566_Trim28	26.01	28.61	32.93	28.61	45.23	39.08	34.41	39.08
ENSMUSG00000005575_Ube2m	49.71	40.06	56.56	49.71	53.36	45.44	68.87	53.36
ENSMUSG00000005580_Adcy9	21.88	12.51	14.48	14.48	18.2	18.83	21.23	18.83
ENSMUSG00000005583_Mef2c	134.8	80.02	76.64	80.02	124.46	119.6	125.66	124.46
ENSMUSG00000005609_Ctr9	25.53	20.81	32.06	25.53	37.27	22.95	30.69	30.69
ENSMUSG00000005610_Eif4g2	145.99	160.28	110.44	145.99	133.6	117.32	132.15	132.15
ENSMUSG00000005611_Mrvi1	0	1.15	0.22	0.22	5.93	1.46	2.7	2.7
ENSMUSG00000005615_Pcyt1a	20.69	11.46	10.95	11.46	22.02	17.11	19.37	19.37
ENSMUSG00000005621_Zfp592	5.4	9.33	8.19	8.19	10.2	11.58	7.6	10.2
ENSMUSG00000005625_Psmd4	189.9	151.69	182.88	182.88	125.39	186.4	158.87	158.87
ENSMUSG00000005628_Tmod4	0.44	0	0	0	0	0	3.06	0
ENSMUSG00000005640_Insrr	0.19	1.67	0	0.19	3.19	6.12	6.3	6.12
ENSMUSG00000005649_Cabp5	0	0.31	0	0	3.81	3.71	6.45	3.81
ENSMUSG00000005656_Snx6	35.03	32.51	24.35	32.51	19.54	21.6	31.96	21.6
ENSMUSG00000005667_Mthfd2	4.35	11.23	10.52	10.52	8.58	20.51	10.42	10.42
ENSMUSG00000005672_Kit	44.58	28.9	37.38	37.38	32.45	59.66	68.1	59.66
ENSMUSG00000005674_Tomm40l	34.29	13.86	8.38	13.86	5.38	21.45	23.35	21.45
ENSMUSG00000005677_Nr1i3	0	0.46	0	0	1.11	6.29	8.85	6.29
ENSMUSG00000005681_Apoa2	2.03	1.56	0	1.56	0	0	0	0
ENSMUSG00000005682_Pan2	4.56	3.21	3.38	3.38	6.47	3.52	4.12	4.12
ENSMUSG00000005683_Cs	54.81	43.08	45.87	45.87	42.05	35.75	33.24	35.75
ENSMUSG00000005686_Ampd3	16.31	6.89	6.84	6.89	14.52	9.74	9.36	9.74
ENSMUSG00000005687_Bcas2	40.61	58.3	29.74	40.61	39.5	43.69	34.99	39.5
ENSMUSG00000005696_Sh2d1a	0.36	3.73	0.18	0.36	0.89	2.65	0	0.89
ENSMUSG00000005698_Ctcf	40.96	47.19	29.97	40.96	39.49	66.87	29.6	39.49
ENSMUSG00000005699_Pard6a	6.05	5.49	10.4	6.05	8.19	5.98	1.36	5.98
ENSMUSG00000005705_Agrp	0	1.04	0	0	0	0	0	0
ENSMUSG00000005716_Pvalb	1139.07	889.78	806.45	889.78	811.86	702.49	621.1	702.49
ENSMUSG00000005718_Tfap4	1.71	1.79	1.35	1.71	1.26	2.23	6.84	2.23
ENSMUSG00000005732_Ranbp1	101.64	86.9	63.2	86.9	70.18	113.41	77.31	77.31
ENSMUSG00000005763_Cd247	3.42	3.46	7.76	3.46	10.65	16.61	15.59	15.59
ENSMUSG00000005774_Rfx5	7.83	6.49	8.04	7.83	7.03	11.49	10.86	10.86
ENSMUSG00000005779_Psmb4	29.76	36.77	25.79	29.76	49.29	33.71	18.78	33.71
ENSMUSG00000005800_Mmp8	0	2.17	0.16	0.16	3.93	10.42	4.52	4.52
ENSMUSG00000005802_Slc30a4	9.37	9.27	7.56	9.27	11.24	6.31	6.38	6.38
ENSMUSG00000005803_Sqrdl	6.82	6.95	5.99	6.82	10.14	14.51	6.61	10.14
ENSMUSG00000005804_Bloc1s6	13.46	7.55	7.03	7.55	8.95	11.39	10.01	10.01
ENSMUSG00000005813_Metap1	14.43	17.12	15.63	15.63	22.92	18.77	27.04	22.92
ENSMUSG00000005823_Gpr108	6.79	4.9	0.78	4.9	2.55	4.5	6.14	4.5
ENSMUSG00000005824_Tnfsf14	0.57	1.77	0	0.57	3.39	4.5	5.26	4.5
ENSMUSG00000005836_Gata6	0	0.33	0.25	0.25	1.08	1.78	1.46	1.46
ENSMUSG00000005846_Rsl1d1	35.27	35.33	26.65	35.27	42.57	36.92	35.89	36.92
ENSMUSG00000005864_Cnga2	0.65	2.96	0	0.65	1.97	2.61	0.51	1.97
ENSMUSG00000005871_Apc	156.5	112.58	153.82	153.82	122.46	82.76	94.74	94.74
ENSMUSG00000005873_Reep5	34.74	30.25	38.45	34.74	26.35	19.02	16.21	19.02
ENSMUSG00000005881_Ergic3	46.52	39.06	22.64	39.06	16.72	17.95	33.82	17.95
ENSMUSG00000005882_Uqcc1	74.16	40.73	47.1	47.1	42.81	48.16	87.58	48.16
ENSMUSG00000005883_Spo11	0	0.14	0.75	0.14	0.95	0.74	3.41	0.95
ENSMUSG00000005886_Ncoa2	46.64	47.43	35.33	46.64	40.92	79.77	104.22	79.77
ENSMUSG00000005891_Prl4a1	0	0	0	0	0	0	0	0
ENSMUSG00000005892_Trh	0	0.41	0	0	0.68	3.6	3.67	3.6
ENSMUSG00000005893_Nr2c2	27.67	33.58	19.47	27.67	28.27	23.65	34.21	28.27
ENSMUSG00000005897_Nr2c1	4.06	3.18	5.65	4.06	5.82	7.38	6.6	6.6
ENSMUSG00000005899_Smpd4	17.28	13.23	15.06	15.06	17.36	17.82	22.39	17.82
ENSMUSG00000005907_Pex1	21.69	55.57	7.08	21.69	53.27	65	105.87	65
ENSMUSG00000005917_Otx1	0.99	0.77	0.14	0.77	4.35	14.62	12.93	12.93
ENSMUSG00000005936_Kctd20	19.16	20	16.89	19.16	13.77	13.71	25.55	13.77
ENSMUSG00000005947_Itgae	0.19	0.13	0	0.13	1.78	1.77	2.81	1.78
ENSMUSG00000005949_Ctns	4.93	3.5	4.24	4.24	4.08	16.74	8.71	8.71
ENSMUSG00000005950_P2rx5	0.42	1.33	0	0.42	0.37	0.49	0.66	0.49
ENSMUSG00000005951_Shpk	0.62	1.31	1.98	1.31	2.47	4.5	3.35	3.35
ENSMUSG00000005952_Trpv1	0.48	0.79	0.15	0.48	1.31	12	6.49	6.49
ENSMUSG00000005958_Ephb3	1.22	0.38	0	0.38	1.23	4.77	7.05	4.77
ENSMUSG00000005968_Tuft1	5.82	5.67	0.19	5.67	7.42	8.46	11.25	8.46
ENSMUSG00000005973_Rcn1	3.32	3.6	3.67	3.6	4.22	5.42	4.35	4.35
ENSMUSG00000005980_Dnase1	4.16	6.05	0.14	4.16	1.56	10.38	18.68	10.38
ENSMUSG00000005981_Trap1	42.82	26.94	39.15	39.15	34.84	36.18	48.01	36.18
ENSMUSG00000005982_Naa60	25.32	18.84	56.35	25.32	31.85	20.12	32.39	31.85
ENSMUSG00000005983_1700037C18Rik	0.7	2.12	1.52	1.52	1.13	3.17	6	3.17
ENSMUSG00000005986_Ankrd13d	9.77	8	7.36	8	16.43	3.87	7.39	7.39
ENSMUSG00000005994_Tyrp1	0.1	2.65	1.37	1.37	1.86	13.16	11.85	11.85
ENSMUSG00000006005_Tpr	129.79	139.56	183.21	139.56	242.29	210.1	213.39	213.39
ENSMUSG00000006007_Pdc	0.07	0.78	0	0.07	2.83	2.73	2.32	2.73
ENSMUSG00000006010_BC003331	65.96	37.68	28.7	37.68	62.94	49.78	65.14	62.94
ENSMUSG00000006014_Prg4	0.07	1.44	0.89	0.89	6.06	4.21	4.66	4.66
ENSMUSG00000006019_Dhx34	1.63	1.01	0.72	1.01	1.97	5.75	8.49	5.75
ENSMUSG00000006021_Kptn	4	4.67	1.88	4	8.65	5.74	10.12	8.65
ENSMUSG00000006024_Napa	51.16	32.9	49.15	49.15	45.46	36.91	50.79	45.46
ENSMUSG00000006050_Sra1	34.12	24.11	32.74	32.74	38.24	15.64	28.48	28.48
ENSMUSG00000006056_Calcoco2	0	0	0	0	1.69	8.79	10.95	8.79
ENSMUSG00000006057_Atp5g1	64.97	72.62	54.95	64.97	57.75	29.53	43.31	43.31
ENSMUSG00000006058_Snf8	52.01	23.51	36.63	36.63	22.09	120.82	87.04	87.04
ENSMUSG00000006095_Tbcb	35.23	16.77	20.3	20.3	18.43	27.54	13.12	18.43
ENSMUSG00000006127_Inpp5k	22.02	21.6	18.07	21.6	26.74	26.23	24.72	26.23
ENSMUSG00000006134_Crkl	20.06	14.51	17.6	17.6	12.57	7.58	11.93	11.93
ENSMUSG00000006143_Upk3bl	1.08	2.09	0	1.08	0	2.22	1.57	1.57
ENSMUSG00000006154_Eps8l1	6.69	4.22	4.49	4.49	11.65	26.58	35.54	26.58
ENSMUSG00000006169_Clint1	34.31	24.79	27.56	27.56	28.29	30.89	32.57	30.89
ENSMUSG00000006179_Prss16	0.51	1.55	0.95	0.95	0.41	5.87	7.96	5.87
ENSMUSG00000006191_Cdkal1	18.96	39.67	32.74	32.74	32.11	30.91	51.25	32.11
ENSMUSG00000006200_Rhox6	0	0	1.83	0	1.96	0	1.78	1.78
ENSMUSG00000006204_5430419D17Rik	0	1.09	0	0	3.55	8.44	5.87	5.87
ENSMUSG00000006205_Htra1	111.74	87.26	80.16	87.26	89.59	74.37	102.8	89.59
ENSMUSG00000006215_Zbtb17	7.05	5.19	5.3	5.3	10.79	6.71	7.38	7.38
ENSMUSG00000006216_Clcnkb	2.92	3.79	3.78	3.78	3.74	20.73	54.46	20.73
ENSMUSG00000006218_Fam131c	0.38	0.79	0	0.38	1.95	0.86	4.71	1.95
ENSMUSG00000006219_Fblim1	0.33	3.84	0.26	0.33	1.99	9.08	0.51	1.99
ENSMUSG00000006221_Hspb7	0	0.76	1.44	0.76	1.26	4.57	3.4	3.4
ENSMUSG00000006235_Epor	0.72	0.9	1.36	0.9	2.47	4.58	0.89	2.47
ENSMUSG00000006241_Ccdc159	1.78	1.84	1.67	1.78	2.38	1.6	2.18	2.18
ENSMUSG00000006262_Mob1b	10.26	12.57	6.19	10.26	16.2	11.36	10.99	11.36
ENSMUSG00000006269_Atp6v1b1	2.13	6.99	0.27	2.13	14.5	13.25	17.08	14.5
ENSMUSG00000006270_Vax1	0	0	0	0	1.89	0	0	0
ENSMUSG00000006273_Atp6v1b2	92.81	79.87	75.54	79.87	69.85	53.65	57.17	57.17
ENSMUSG00000006276_Eps15l1	22.07	19.41	24.06	22.07	15.37	15.25	9.41	15.25
ENSMUSG00000006281_Tep1	1.09	1.35	0.23	1.09	1.32	1.48	1.83	1.48
ENSMUSG00000006288_Ttc5	17.75	22.63	31.95	22.63	16.65	42.23	48.72	42.23
ENSMUSG00000006289_Osgep	18.15	13.26	17.23	17.23	18.08	19.19	9.61	18.08
ENSMUSG00000006299_Aamp	175.98	102.44	113.94	113.94	73.82	379.14	210.86	210.86
ENSMUSG00000006301_Tmbim1	7.06	11.32	4.73	7.06	16.3	21.26	12.71	16.3
ENSMUSG00000006304_Arpc2	87.31	62.38	67.85	67.85	69.17	62.25	65.01	65.01
ENSMUSG00000006307_Kmt2b	14.71	16.98	17.34	16.98	15.65	27.35	12.27	15.65
ENSMUSG00000006310_Zbtb32	4.09	0.93	0	0.93	1.53	8.9	17.68	8.9
ENSMUSG00000006311_Etv2	0	0	0	0	0	2.51	0	0
ENSMUSG00000006313_Upk1a	0	0	0	0	1.31	1.74	2.38	1.74
ENSMUSG00000006315_Tmem147	28.75	13.92	11.08	13.92	10.98	15.83	4.23	10.98
ENSMUSG00000006333_Rps9	122.42	110.74	131.85	122.42	92.07	83.12	69.96	83.12
ENSMUSG00000006335_Tfpt	22.27	10.64	9.58	10.64	13.21	50.95	28.48	28.48
ENSMUSG00000006342_Susd2	0.61	0.72	0.96	0.72	2.39	2.77	2.16	2.39
ENSMUSG00000006344_Ggt5	0.57	1.51	3.35	1.51	5.31	27.24	13.46	13.46
ENSMUSG00000006345_Ggt1	1.19	1.69	0	1.19	4.52	14.79	11.4	11.4
ENSMUSG00000006356_Crip2	9.86	4.79	3.88	4.79	3.88	23.85	12.47	12.47
ENSMUSG00000006360_Crip1	1.14	3.53	0	1.14	3.49	6.63	10.72	6.63
ENSMUSG00000006362_Cbfa2t3	7.54	7.43	14.17	7.54	6.55	19.31	19.82	19.31
ENSMUSG00000006369_Fbln1	1.46	1.75	1.07	1.46	0.93	1.24	2.95	1.24
ENSMUSG00000006373_Pgrmc1	41.25	29.78	52.36	41.25	30.55	18.02	15.78	18.02
ENSMUSG00000006378_Gcat	0.91	1.06	3.07	1.06	4.38	6	8.28	6
ENSMUSG00000006386_Tek	1.22	1.91	2.78	1.91	2.64	2.96	6.7	2.96
ENSMUSG00000006389_Mpl	0	0.54	0.67	0.54	1.48	5.85	2.66	2.66
ENSMUSG00000006390_Elovl1	2.13	14.1	16.65	14.1	14.8	48.36	32.93	32.93
ENSMUSG00000006392_Med8	60.9	47.69	57.48	57.48	51.51	50.08	70.06	51.51
ENSMUSG00000006395_Hyi	5.76	7.36	2.99	5.76	3.65	15.63	13.25	13.25
ENSMUSG00000006398_Cdc20	0.74	4.57	0.93	0.93	8.6	13.42	6.01	8.6
ENSMUSG00000006403_Adamts4	11.76	7.52	2.11	7.52	5.55	10.43	4.87	5.55
ENSMUSG00000006411_Pvrl4	2.85	2.6	4.27	2.85	2.96	3.91	4.85	3.91
ENSMUSG00000006412_Pfdn2	74.01	61.19	119.26	74.01	77.8	97.55	129.53	97.55
ENSMUSG00000006418_Rnf114	7.57	10.96	10.43	10.43	12.63	10.17	14.75	12.63
ENSMUSG00000006423_C330007P06Rik	22.18	24.46	20.36	22.18	26.08	24.36	29.73	26.08
ENSMUSG00000006435_Neurl1a	5.83	4.66	4.98	4.98	2.44	5.37	7.97	5.37
ENSMUSG00000006442_Srm	12.35	6.45	2.92	6.45	5.31	7.31	5.1	5.31
ENSMUSG00000006445_Epha2	0.06	0.77	0	0.06	7.07	11.33	13.94	11.33
ENSMUSG00000006456_Rbm14	9.41	7.53	20.95	9.41	9.63	5	7.25	7.25
ENSMUSG00000006457_Actn3	1.36	1.88	0	1.36	0	0	0	0
ENSMUSG00000006462_A530013C23Rik	0.2	2.43	1.25	1.25	2.11	7.72	7.79	7.72
ENSMUSG00000006463_Zdhhc24	9.03	9.36	8.2	9.03	17.29	13.91	35.15	17.29
ENSMUSG00000006464_Bbs1	4.06	3.08	1.37	3.08	4.51	5.16	4.61	4.61
ENSMUSG00000006469_Slc34a3	0.12	0	0	0	0.81	0	0.73	0.73
ENSMUSG00000006471_Ndor1	6.65	4.39	1.38	4.39	16.75	22.88	26.75	22.88
ENSMUSG00000006476_Nsmf	31.64	21.85	28.34	28.34	17.14	26.06	32.26	26.06
ENSMUSG00000006488_Prl7a1	0	0	0	0	0	1.49	0	0
ENSMUSG00000006490_Prl8a9	0	0	0	0	0	0	0	0
ENSMUSG00000006494_Pdk1	5.94	4.48	5.58	5.58	9.79	12.45	11.85	11.85
ENSMUSG00000006498_Ptbp1	18.01	13.25	20.06	18.01	15.31	33.32	18.36	18.36
ENSMUSG00000006517_Mvd	6.03	1.88	0.71	1.88	0	2.73	0.93	0.93
ENSMUSG00000006519_Cyba	3.13	0	0.67	0.67	1.41	3.79	0	1.41
ENSMUSG00000006522_Itih3	72.09	50.2	46.13	50.2	42.26	50.47	29.82	42.26
ENSMUSG00000006526_Tmem110	8.07	7.06	10.36	8.07	4.63	5.5	5.62	5.5
ENSMUSG00000006527_Sfmbt1	8.89	9.43	11.98	9.43	15.25	12.69	4.4	12.69
ENSMUSG00000006529_Itih1	0	0.51	0	0	5.01	1.48	0.51	1.48
ENSMUSG00000006538_Ihh	0	0.41	0	0	1.78	4.11	2.51	2.51
ENSMUSG00000006542_Prkag3	0.35	0.91	0.84	0.84	4.43	6.27	3.48	4.43
ENSMUSG00000006546_Cryba2	0	0	0	0	1.1	1.47	3.99	1.47
ENSMUSG00000006567_Atp7b	0.91	0.85	0.76	0.85	1.28	1.36	2.31	1.36
ENSMUSG00000006570_Defb2	0	0	0	0	0	18.36	0	0
ENSMUSG00000006574_Slc4a1	0.11	0.11	0.08	0.11	0.93	2.21	1.01	1.01
ENSMUSG00000006575_Rundc3a	83.01	61.3	67.66	67.66	51.53	77.35	70.95	70.95
ENSMUSG00000006576_Slc4a3	46.02	23.88	55.58	46.02	17.65	77.57	54.92	54.92
ENSMUSG00000006585_Cdt1	0.71	1.23	0	0.71	0.4	4.83	2.19	2.19
ENSMUSG00000006586_Runx1t1	9.03	14.67	7.99	9.03	16.25	18.32	15.35	16.25
ENSMUSG00000006587_Snai3	0	0	0	0	0.58	0.77	5.23	0.77
ENSMUSG00000006589_Aprt	1.48	2.21	5.57	2.21	3.56	4.78	10.83	4.78
ENSMUSG00000006599_Gtf2h1	21.02	18.38	30.55	21.02	23.74	27.27	28.21	27.27
ENSMUSG00000006611_Hfe	5.78	4.22	4.89	4.89	2.76	4.97	7.65	4.97
ENSMUSG00000006638_Abhd1	1.61	2.15	7.54	2.15	4.75	0	0	0
ENSMUSG00000006641_Slc5a6	2.93	4.59	7.65	4.59	5.59	8.73	2.39	5.59
ENSMUSG00000006642_Tcf23	0.53	1.49	0.47	0.53	1.65	5.73	3.72	3.72
ENSMUSG00000006649_Nphs1	0.29	0.55	0.33	0.33	3.22	4.55	4.58	4.55
ENSMUSG00000006651_Aplp1	261.82	106.14	126.33	126.33	131.68	179.11	74.55	131.68
ENSMUSG00000006673_Qrich1	47.04	44.66	59.44	47.04	50.36	73.71	66.75	66.75
ENSMUSG00000006675_P4htm	17.21	11.04	22.61	17.21	20.58	16.58	23.83	20.58
ENSMUSG00000006676_Usp19	33.48	28.38	23.48	28.38	20.36	37.69	41.97	37.69
ENSMUSG00000006678_Pola1	2.87	5.18	4.64	4.64	5.9	6.67	16.65	6.67
ENSMUSG00000006699_Cdc42	108.62	121.26	100.4	108.62	121.87	60.97	76.34	76.34
ENSMUSG00000006705_Pknox1	6.63	9.25	13.43	9.25	17.83	20.55	27.5	20.55
ENSMUSG00000006711_D130043K22Rik	3.77	7.53	1.54	3.77	2.1	5.71	5.04	5.04
ENSMUSG00000006715_Gmnn	9.57	3.86	6.32	6.32	1.04	5.5	4.68	4.68
ENSMUSG00000006717_Acot13	120.5	134.06	120.75	120.75	144.78	87.32	96.56	96.56
ENSMUSG00000006720_Zfp184	1.67	2.42	1.23	1.67	7.56	11.38	4.79	7.56
ENSMUSG00000006724_Cyp27b1	0.32	1.12	0.34	0.34	1.85	3.43	2.67	2.67
ENSMUSG00000006728_Cdk4	11.44	8.65	12.22	11.44	13.58	20.09	12.52	13.58
ENSMUSG00000006731_B4galnt1	11.37	7.08	12.16	11.37	6.73	8.92	10.88	8.92
ENSMUSG00000006732_Mettl1	2.77	5.64	4.65	4.65	2.02	17.21	8.85	8.85
ENSMUSG00000006736_Tspan31	21.02	12.01	14.95	14.95	7.85	6.9	15.44	7.85
ENSMUSG00000006740_Kif5b	166.19	147.32	151.09	151.09	190.34	144.75	220.7	190.34
ENSMUSG00000006763_Saal1	3.38	4.01	2.54	3.38	4.49	4.99	5.51	4.99
ENSMUSG00000006764_Tph2	0	0.8	0.3	0.3	1.33	1.32	2.4	1.33
ENSMUSG00000006777_Krt23	0	0.36	0	0	0.59	0	1.06	0.59
ENSMUSG00000006782_Cnp	79.9	54.04	67.49	67.49	60.33	42.85	44.34	44.34
ENSMUSG00000006784_Ttc25	0.65	3.45	1.55	1.55	5.17	15.16	18.75	15.16
ENSMUSG00000006800_Sulf2	4.04	3.93	2.37	3.93	5.85	14.38	14.05	14.05
ENSMUSG00000006818_Sod2	45.48	47.64	46.15	46.15	36.34	40.97	29.35	36.34
ENSMUSG00000006850_Tmco6	2.62	1.81	0.91	1.81	2.48	0	1.8	1.8
ENSMUSG00000006906_Stambp	18.83	12.18	20.71	18.83	10.19	35.13	31	31
ENSMUSG00000006920_Ezh1	20.08	20.51	16.16	20.08	18.72	30.96	22.33	22.33
ENSMUSG00000006930_Hap1	26.68	19.12	12.33	19.12	11.46	26.51	26.99	26.51
ENSMUSG00000006931_P3h4	2.13	1.23	0.56	1.23	2.03	1.62	2.94	2.03
ENSMUSG00000006932_Ctnnb1	100.75	93.95	70.49	93.95	81.62	60.66	39.21	60.66
ENSMUSG00000006941_Eif1b	99.88	75.94	63.65	75.94	77.39	71.05	56.38	71.05
ENSMUSG00000006948_Klk4	0.23	0.47	0	0.23	1.52	0	13.81	1.52
ENSMUSG00000006958_Chrd	2.55	3.01	0.7	2.55	6.72	3.28	3.81	3.81
ENSMUSG00000006998_Psmd2	82.18	75.99	66.48	75.99	62.31	98.87	70.66	70.66
ENSMUSG00000007021_Syngr3	17.27	11.62	14.22	14.22	8.2	15.11	13.18	13.18
ENSMUSG00000007029_Vars	12.44	14.71	7.14	12.44	23.52	23.48	52.63	23.52
ENSMUSG00000007030_Vwa7	1.46	1.29	1.33	1.33	1.94	3.91	3.04	3.04
ENSMUSG00000007033_Hspa1l	0.56	0.55	0	0.55	3	0	2.3	2.3
ENSMUSG00000007034_Slc44a4	0	0.34	0	0	0.57	1.87	2.55	1.87
ENSMUSG00000007035_Msh5	8.53	3.84	0.72	3.84	2.97	6.42	3.46	3.46
ENSMUSG00000007036_Abhd16a	32.6	23.68	30.93	30.93	20.25	36.37	43.76	36.37
ENSMUSG00000007038_Neu1	9.71	7.73	7.8	7.8	7.09	16.41	11.54	11.54
ENSMUSG00000007039_Ddah2	14.31	8.02	11.57	11.57	4.55	25.53	14.89	14.89
ENSMUSG00000007041_Clic1	11.42	7.34	11.97	11.42	9.54	5.89	11.41	9.54
ENSMUSG00000007050_Lsm2	13.9	6.44	10.45	10.45	11.36	22.92	21.19	21.19
ENSMUSG00000007080_Pole	0.58	1.88	0.69	0.69	2.86	13.96	4.85	4.85
ENSMUSG00000007097_Atp1a2	227.53	187.03	192.34	192.34	198.78	137.8	213.29	198.78
ENSMUSG00000007107_Atp1a4	0	0	0	0	0.25	8.41	0.45	0.45
ENSMUSG00000007122_Casq1	0.92	0	1.41	0.92	0	1.34	6.67	1.34
ENSMUSG00000007207_Stx1a	1.43	2.77	2.26	2.26	2.21	5.44	2.28	2.28
ENSMUSG00000007209_Ceacam9	1.04	5.34	2.85	2.85	0.67	11.85	5.08	5.08
ENSMUSG00000007216_Zfp775	1.31	1.08	0.47	1.08	3.23	5.78	6.76	5.78
ENSMUSG00000007279_Scube2	0.62	2.25	0.77	0.77	3.59	6.88	2.67	3.59
ENSMUSG00000007338_Mrpl49	16.56	14.77	17.47	16.56	21.63	16.81	14.31	16.81
ENSMUSG00000007379_Dennd2c	0.75	2.81	2.01	2.01	8.48	2.78	7.64	7.64
ENSMUSG00000007411_Mark3	27.24	23.26	28.32	27.24	24.92	19.1	19.19	19.19
ENSMUSG00000007415_Gatad1	54.03	46.62	36.17	46.62	56.38	42.35	55.64	55.64
ENSMUSG00000007440_Pcdha11	1.7	1.21	0.77	1.21	3.34	1.98	2.35	2.35
ENSMUSG00000007457_2310003L06Rik	0.17	1.74	0	0.17	4.57	3.8	7.24	4.57
ENSMUSG00000007458_M6pr	39.78	35.07	42.19	39.78	36.03	40.7	35.62	36.03
ENSMUSG00000007476_Lrrc8a	35.66	24.87	25.91	25.91	27.11	29.38	35.18	29.38
ENSMUSG00000007480_Mc5r	1	1.53	0.77	1	2.49	12.16	6.02	6.02
ENSMUSG00000007564_Ppp2r1a	78.27	65.11	67.83	67.83	52.01	47.71	49.6	49.6
ENSMUSG00000007570_Fance	4.91	3.15	1.67	3.15	6.46	42.03	7.15	7.15
ENSMUSG00000007589_Tinf2	10.27	9.54	11.3	10.27	8.36	12.49	16.08	12.49
ENSMUSG00000007591_Tssk4	0.19	0.99	1.24	0.99	1.62	5.01	1.95	1.95
ENSMUSG00000007594_Hapln4	44.89	27.16	26.85	27.16	30.63	25.94	27.18	27.18
ENSMUSG00000007603_Dus3l	12.87	8.82	10.88	10.88	12.64	9.13	3.46	9.13
ENSMUSG00000007610_Gtpbp3	12.41	7.01	7.46	7.46	10.61	25.23	21.94	21.94
ENSMUSG00000007613_Tgfbr1	5.25	4.29	2.9	4.29	7.93	7.05	3.15	7.05
ENSMUSG00000007617_Homer1	30.03	34.36	26.81	30.03	20.94	27.71	26.62	26.62
ENSMUSG00000007646_Rad51c	1.32	1.95	4	1.95	3.89	2	3.74	3.74
ENSMUSG00000007653_Gabrb2	68.04	69.53	56.06	68.04	64.53	45.92	55.37	55.37
ENSMUSG00000007655_Cav1	0.89	1.89	0.58	0.89	4.65	8.32	3.25	4.65
ENSMUSG00000007656_Arpp19	100.05	104.22	85.6	100.05	66.11	95.18	112.01	95.18
ENSMUSG00000007659_Bcl2l1	74.31	40.03	41.89	41.89	39.73	64.81	62.32	62.32
ENSMUSG00000007670_Khsrp	18.96	13	16.72	16.72	12.16	19.73	10.38	12.16
ENSMUSG00000007682_Dio2	9.47	10.25	7.35	9.47	6.92	7.81	8.57	7.81
ENSMUSG00000007721_Ccdc124	113.17	64.17	93.42	93.42	46.82	153.73	87.3	87.3
ENSMUSG00000007739_Cct4	50.88	38.83	24.87	38.83	39.03	78.69	50.15	50.15
ENSMUSG00000007777_0610009B22Rik	10.49	20.83	7.88	10.49	7.73	8.64	7.05	7.73
ENSMUSG00000007783_Cpt1c	8.24	3.2	6.11	6.11	5.29	7.41	3.93	5.29
ENSMUSG00000007805_Twist2	0.31	0.77	0.26	0.31	1.71	3.56	1.88	1.88
ENSMUSG00000007812_Zfp655	12.78	15.85	13.49	13.49	18.77	26.79	21.89	21.89
ENSMUSG00000007815_Rhoa	101.46	61.48	76.65	76.65	117.2	101.53	119.42	117.2
ENSMUSG00000007817_Zmiz1	33.83	23.17	39.56	33.83	18.11	33.22	24.7	24.7
ENSMUSG00000007827_Ankrd26	19.3	16.57	12.58	16.57	16.96	11.44	20.07	16.96
ENSMUSG00000007833_Aldh16a1	1.18	1.24	0	1.18	0.73	0.45	0.62	0.62
ENSMUSG00000007836_Hnrnpa0	29.19	27.37	30.21	29.19	20.5	18.52	16.45	18.52
ENSMUSG00000007837_Prrg2	0.22	2.68	2.7	2.68	1.46	5.83	2.65	2.65
ENSMUSG00000007850_Hnrnph1	178.14	149.82	161.9	161.9	179.65	165.72	193.33	179.65
ENSMUSG00000007867_Ift43	6.92	4.27	1.94	4.27	0	20.26	12.52	12.52
ENSMUSG00000007872_Id3	0.66	1.82	2.75	1.82	2.94	4.94	5.38	4.94
ENSMUSG00000007877_Tcap	0.33	2.62	1.98	1.98	1.06	7.1	3.86	3.86
ENSMUSG00000007880_Arid1a	33.95	28.64	35.62	33.95	64.87	36.96	44.74	44.74
ENSMUSG00000007888_Crlf1	0.16	2.81	0	0.16	0	0	1.01	0
ENSMUSG00000007891_Ctsd	46.52	43.31	46.89	46.52	45.24	38.89	50.92	45.24
ENSMUSG00000007892_Rplp1	372.27	273.57	375.1	372.27	327.35	266.36	259.8	266.36
ENSMUSG00000007907_Cabs1	0.54	0.37	0.28	0.37	1.23	0.82	1.11	1.11
ENSMUSG00000007908_Hmgcll1	4.83	6.14	11.3	6.14	9.73	1.52	3.41	3.41
ENSMUSG00000007944_Ttc9b	4.22	3.87	3.59	3.87	6.08	3.92	2.49	3.92
ENSMUSG00000007946_Phox2a	0	0.69	0	0	1.71	9.07	2.06	2.06
ENSMUSG00000007950_Abhd8	19.3	12.31	18.61	18.61	16.22	9.56	4.07	9.56
ENSMUSG00000007987_Ift22	5.57	8.24	7.96	7.96	7.44	11.53	20.51	11.53
ENSMUSG00000007989_Fzd3	12.43	12.57	11.73	12.43	11.03	15.93	12.89	12.89
ENSMUSG00000008028_1700008O03Rik	0.43	4.76	3.6	3.6	16.36	18.63	24.74	18.63
ENSMUSG00000008035_Mid1ip1	84.4	53.22	70.58	70.58	37.56	78.54	51.92	51.92
ENSMUSG00000008036_Ap2s1	35.15	25.97	35.63	35.15	12.43	31.75	34.21	31.75
ENSMUSG00000008090_Fgfrl1	7.78	5.07	5.05	5.07	10.87	10.22	9.53	10.22
ENSMUSG00000008129_4930432K21Rik	0.22	0.45	0.94	0.45	1.64	7.88	5.37	5.37
ENSMUSG00000008136_Fhl2	4.28	0.4	0	0.4	5.02	8.34	1.19	5.02
ENSMUSG00000008140_Emc10	29.95	24.49	27.84	27.84	11.75	5.31	11.47	11.47
ENSMUSG00000008153_Clstn3	174.4	114.45	116.19	116.19	122.02	134.21	86.08	122.02
ENSMUSG00000008167_Fbxw9	6.56	4.59	5.4	5.4	3.7	21.52	7.79	7.79
ENSMUSG00000008193_Spib	0.36	0.57	0.71	0.57	1.31	3.71	2.25	2.25
ENSMUSG00000008200_Fnbp4	81.94	63.58	62.69	63.58	88.77	122.55	72.33	88.77
ENSMUSG00000008206_Cers4	16.53	15.91	13.35	15.91	24.4	27.48	44.62	27.48
ENSMUSG00000008226_Scrn3	20.97	18.8	15.32	18.8	33.61	35.31	42.57	35.31
ENSMUSG00000008301_Phax	30.46	41.76	44.78	41.76	48.68	42.33	26.33	42.33
ENSMUSG00000008305_Tle1	9.74	8.66	12.35	9.74	11.12	14.09	23.78	14.09
ENSMUSG00000008307_1700109H08Rik	6.7	11.4	16.05	11.4	21.33	3.16	20.27	20.27
ENSMUSG00000008318_Relt	5.17	2.94	1.35	2.94	4.26	6.17	3.84	4.26
ENSMUSG00000008333_Snrpb2	13.71	22.83	20.76	20.76	19.45	21.97	14.84	19.45
ENSMUSG00000008348_Ubc	216.77	141.71	141.82	141.82	102.68	129.34	83.06	102.68
ENSMUSG00000008373_Prpf31	53.37	53.49	43.28	53.37	48.76	107.53	86.48	86.48
ENSMUSG00000008384_Sertad1	2.55	4.92	1.79	2.55	1.55	9.27	14.43	9.27
ENSMUSG00000008393_Carhsp1	2.54	3.32	3.48	3.32	0.91	7.25	3.3	3.3
ENSMUSG00000008398_Elk3	2.41	3.52	3.58	3.52	5.8	3.2	4.36	4.36
ENSMUSG00000008429_Herpud2	22.2	19.76	15.07	19.76	21.87	12.17	11.44	12.17
ENSMUSG00000008435_Rdh13	6.66	6.68	1.56	6.66	14.35	9.12	10.17	10.17
ENSMUSG00000008438_Adam21	0.17	1.8	0	0.17	2.38	2.36	2.15	2.36
ENSMUSG00000008450_Nutf2	7.48	17.36	12.67	12.67	10.88	12.54	14.7	12.54
ENSMUSG00000008461_Fut1	0.2	1.03	1.08	1.03	2.71	5.83	12.23	5.83
ENSMUSG00000008475_Arpc5	9.27	10.14	10.07	10.07	10.82	18.13	6.62	10.82
ENSMUSG00000008482_Rnf151	0.24	0.99	0	0.24	1.61	2.15	0	1.61
ENSMUSG00000008489_Elavl2	5.98	15.65	10.43	10.43	8	11.98	16.55	11.98
ENSMUSG00000008496_Pou2f2	1.26	1.93	0.86	1.26	2.83	3.44	7.55	3.44
ENSMUSG00000008540_Mgst1	17.12	16.87	7.66	16.87	8.7	6.97	13.72	8.7
ENSMUSG00000008575_Nfib	52.37	39	55.61	52.37	45.2	37.88	33.18	37.88
ENSMUSG00000008590_Htr3b	0	1.55	0.5	0.5	2.55	5.79	9.21	5.79
ENSMUSG00000008601_Rab25	0	0.74	0	0	4.4	3.19	2.17	3.19
ENSMUSG00000008604_Ubqln4	17.65	13.01	11.82	13.01	15.22	24.31	28.54	24.31
ENSMUSG00000008658_Rbfox1	27.35	24.38	32.06	27.35	27.95	27.23	31.07	27.95
ENSMUSG00000008668_Rps18	167.22	119.52	134.47	134.47	97.52	131.46	133.8	131.46
ENSMUSG00000008682_Rpl10	90.77	102.05	95.7	95.7	83.48	52.49	57.09	57.09
ENSMUSG00000008683_Rps15a	275.21	209.17	41.39	209.17	168.78	88.49	81.81	88.49
ENSMUSG00000008690_Ncaph2	16.79	19.54	17.2	17.2	19.02	41.35	26.49	26.49
ENSMUSG00000008730_Hipk1	63.61	56.14	46.5	56.14	49.42	45.83	44.82	45.83
ENSMUSG00000008734_Gprc5b	114.14	104.25	81.93	104.25	111.72	84.12	94.97	94.97
ENSMUSG00000008763_Man1a2	113.13	110.22	140.46	113.13	136.9	181.28	163.03	163.03
ENSMUSG00000008789_Ceacam5	0	0.95	0	0	0.79	1.74	2.84	1.74
ENSMUSG00000008813_Tppp2	0	0	0	0	0	0	0	0
ENSMUSG00000008822_Acyp1	36	47.1	21.64	36	27.91	34.87	41.21	34.87
ENSMUSG00000008843_Cldn13	0	1.7	1.28	1.28	2.75	8.58	5.01	5.01
ENSMUSG00000008845_Cd163	1.02	1.88	0.44	1.02	2.27	4.13	4.14	4.13
ENSMUSG00000008855_Hdac5	92.74	44.41	36.23	44.41	27.05	45.83	53.01	45.83
ENSMUSG00000008859_Rala	42.51	38.51	36.22	38.51	29.54	35.67	30.47	30.47
ENSMUSG00000008874_Clec3a	0	0	0	0	3.98	0	10.97	3.98
ENSMUSG00000008892_Vdac3	140.29	94.63	98.09	98.09	89.99	88.65	74.72	88.65
ENSMUSG00000008932_Slc1a7	0.14	0.17	0	0.14	0.48	1.9	3.72	1.9
ENSMUSG00000008958_Vps72	69.04	40.86	34.45	40.86	20.65	93.72	113.61	93.72
ENSMUSG00000008976_Gabpa	31.77	29.3	25.22	29.3	32.81	16.72	30.99	30.99
ENSMUSG00000008999_Bmp7	0.98	1.26	0	0.98	3.43	15.41	6.64	6.64
ENSMUSG00000009013_Dynll1	80.83	61.89	80.4	80.4	59.43	68.87	70.45	68.87
ENSMUSG00000009030_Pdcl	146.58	120.05	89.36	120.05	94.13	175.38	192.05	175.38
ENSMUSG00000009035_Tmem184b	39.29	25.92	26.35	26.35	17.88	33.45	27.65	27.65
ENSMUSG00000009047_Gm5965	0	5.09	0	0	0	0	0	0
ENSMUSG00000009070_Rsph14	0.56	2.21	0	0.56	1.97	12.62	8.61	8.61
ENSMUSG00000009073_Nf2	35.21	28.3	45.89	35.21	31.26	26.61	35.87	31.26
ENSMUSG00000009075_Cabp7	19.85	14.24	14.66	14.66	17.9	19.78	23.98	19.78
ENSMUSG00000009076_Zmat5	8.15	5.93	5.43	5.93	5.31	5.26	3.58	5.26
ENSMUSG00000009079_Ewsr1	459.64	420.11	1049.92	459.64	567.37	1195.64	619.37	619.37
ENSMUSG00000009090_Ap1b1	46.14	28.03	49.95	46.14	29.36	87.48	49.6	49.6
ENSMUSG00000009092_Derl3	0.42	1.29	0	0.42	2.82	6.56	3.83	3.83
ENSMUSG00000009093_Gstt4	0	0	0	0	1.07	0	0	0
ENSMUSG00000009097_Tbx1	0.3	0.31	1.4	0.31	2.04	2.7	5.53	2.7
ENSMUSG00000009108_Gnat2	0.25	2.25	0	0.25	3.05	0.46	8.18	3.05
ENSMUSG00000009112_Bcl2l13	12.21	15.49	4.65	12.21	8.38	22.16	9.12	9.12
ENSMUSG00000009114_2610028H24Rik	0	0.45	0	0	0	0.93	0	0
ENSMUSG00000009115_Spatc1l	0.21	0	0	0	0	2.82	1.68	1.68
ENSMUSG00000009145_Dqx1	0	0.48	0.48	0.48	1.58	2.53	5.18	2.53
ENSMUSG00000009185_Ccl8	0	0	0	0	0	0	0	0
ENSMUSG00000009207_Lnp	35.58	38.1	15.01	35.58	33.7	27.57	32.3	32.3
ENSMUSG00000009210_Prr29	0	0	0	0	3.83	1.13	6.15	3.83
ENSMUSG00000009214_Tmem8c	0	0	1.1	0	0.68	0.9	1.23	0.9
ENSMUSG00000009216_Fam163b	1.51	3.54	2.67	2.67	7.02	6.58	6.33	6.58
ENSMUSG00000009246_Trpm5	0	1.2	1.28	1.2	2.25	4.7	6.28	4.7
ENSMUSG00000009248_Ascl2	0.17	0.35	0	0.17	1.71	6.07	3.1	3.1
ENSMUSG00000009281_Rarres2	11.21	8.08	5.62	8.08	4.59	12.24	17.5	12.24
ENSMUSG00000009291_Pttg1ip	44.31	27.88	29.85	29.85	52	39.49	25.52	39.49
ENSMUSG00000009292_Trpm2	12.86	10.94	12.02	12.02	10.28	14.92	14.96	14.92
ENSMUSG00000009293_Ube2g2	11.85	9.34	25.98	11.85	12.9	12.51	18.26	12.9
ENSMUSG00000009350_Mpo	0	0.88	0.17	0.17	1.58	8.46	15.76	8.46
ENSMUSG00000009356_Lpo	0.34	22.53	0	0.34	0.59	3.13	5.34	3.13
ENSMUSG00000009376_Met	0.72	0.85	0.5	0.72	2.05	1.44	4.53	2.05
ENSMUSG00000009378_Slc16a12	0.42	0.51	0.48	0.48	1.47	2.77	2.27	2.27
ENSMUSG00000009394_Syn2	38.13	33.86	38.01	38.01	32.86	37.74	27.1	32.86
ENSMUSG00000009406_Elk1	13.38	10.3	10.39	10.39	7.83	12.91	15.51	12.91
ENSMUSG00000009418_Nav1	14.19	11.09	11.66	11.66	21.47	21.46	33.89	21.47
ENSMUSG00000009470_Tnpo1	26.31	26.08	26.56	26.31	23.09	16.67	20.22	20.22
ENSMUSG00000009471_Myod1	0.43	0.59	0	0.43	2.91	5.16	1.76	2.91
ENSMUSG00000009487_Otog	0	0.15	0	0	0.49	2.39	1.78	1.78
ENSMUSG00000009535_Rnmt	31.09	39.3	18.95	31.09	48.79	47.2	66.07	48.79
ENSMUSG00000009545_Kcnq1	0.35	2.57	0	0.35	19.85	7.01	22.59	19.85
ENSMUSG00000009549_Srp14	229.83	210.4	192.05	210.4	125.45	205.53	150.65	150.65
ENSMUSG00000009551_6330409D20Rik	0.52	1.46	1.4	1.4	2.6	2.31	0	2.31
ENSMUSG00000009555_Cdk9	21.3	13.78	21.42	21.3	23.51	28.4	31.94	28.4
ENSMUSG00000009563_Tor2a	4.2	7.8	1.75	4.2	15.87	6.06	12.72	12.72
ENSMUSG00000009566_Fpgs	3.7	3.61	4.68	3.7	15.4	23.85	22.64	22.64
ENSMUSG00000009569_Mkl2	20.67	18.62	15.78	18.62	19.6	18.6	14.98	18.6
ENSMUSG00000009575_Cbx5	73.89	72.16	69.8	72.16	91.72	50.69	74.79	74.79
ENSMUSG00000009580_Odam	0	0.73	0	0	1.18	0	0	0
ENSMUSG00000009585_Apobec3	3.5	3.88	0.83	3.5	5.42	18.29	5.46	5.46
ENSMUSG00000009588_St6galnac1	0.11	0.67	0.17	0.17	1.84	9.06	10.27	9.06
ENSMUSG00000009596_Taf7l	0	0	0	0	1.7	0	0	0
ENSMUSG00000009614_Sardh	9.79	3.27	2.15	3.27	5.15	5.04	16.28	5.15
ENSMUSG00000009621_Vav2	1.89	5.06	6.93	5.06	15.08	19.62	17.65	17.65
ENSMUSG00000009628_Tex15	0.61	1.4	0.39	0.61	3.78	3	3.54	3.54
ENSMUSG00000009630_Ppp2cb	58.54	44.42	38.83	44.42	36.07	30.82	36.64	36.07
ENSMUSG00000009633_G0s2	8.79	15.36	13.83	13.83	4.72	12.65	15.05	12.65
ENSMUSG00000009640_Dmap1	18.82	9.48	13.95	13.95	19.75	48.18	48.14	48.14
ENSMUSG00000009646_Pla2g12b	0	0.55	0	0	0	3.51	4.87	3.51
ENSMUSG00000009647_Mcu	11.98	12.52	5.1	11.98	9.91	21.02	20.04	20.04
ENSMUSG00000009654_Oit3	0	0	0.15	0	0.32	1.27	7.48	1.27
ENSMUSG00000009670_Tex11	0	0	0	0	0.34	0	0	0
ENSMUSG00000009681_Bcr	14	10.77	13.59	13.59	11.12	10.63	11.74	11.12
ENSMUSG00000009687_Fxyd5	3.29	3.1	9.48	3.29	1.44	26.42	9.6	9.6
ENSMUSG00000009731_Kcnd1	6.17	5.29	5.25	5.29	1.32	17.28	3.44	3.44
ENSMUSG00000009733_Tfcp2	7.29	3.52	5.2	5.2	6.35	5.25	1.91	5.25
ENSMUSG00000009734_Pou6f2	0.04	1.69	1.77	1.69	6.61	12.8	7.83	7.83
ENSMUSG00000009739_Pou6f1	9.86	11.17	5.27	9.86	17.69	22.42	35.27	22.42
ENSMUSG00000009741_Ubp1	16.61	13.54	18.65	16.61	18.71	18.35	7.63	18.35
ENSMUSG00000009772_Nuak2	0.68	1.6	0.4	0.68	2.47	11.96	7.01	7.01
ENSMUSG00000009828_Ick	7.06	7.81	11.51	7.81	17.04	23.19	24.95	23.19
ENSMUSG00000009863_Sdhb	80.97	64.34	59.85	64.34	62.03	50.14	43.04	50.14
ENSMUSG00000009876_Cox4i2	12.27	1.86	5.59	5.59	2.98	5.96	0	2.98
ENSMUSG00000009894_Snap47	89.76	63.02	92.49	89.76	74.03	52.55	46.76	52.55
ENSMUSG00000009900_Wnt3a	0	0.38	0.86	0.38	1.89	6.67	6.82	6.67
ENSMUSG00000009905_Kdsr	33.91	48.67	25.01	33.91	27.45	25.41	16.86	25.41
ENSMUSG00000009907_Vps4b	28.5	35.5	31.67	31.67	36.48	14.08	36.3	36.3
ENSMUSG00000009927_Rps25	34.06	43.82	47.25	43.82	50.12	13.13	14.86	14.86
ENSMUSG00000009941_Nxf2	0	0.3	0	0	0	0.66	0	0
ENSMUSG00000009995_Taz	17.82	10.95	29.47	17.82	20.25	21.61	15.15	20.25
ENSMUSG00000010021_Kif19a	0.58	3.35	0	0.58	1.96	3.92	6.23	3.92
ENSMUSG00000010025_Aldh3a2	15.49	18.2	13.39	15.49	11.56	14.42	16	14.42
ENSMUSG00000010044_Zmynd10	0	0	0	0	1.9	0	5.93	1.9
ENSMUSG00000010045_Tmem115	10.43	6.37	5.74	6.37	8.48	9.1	15.32	9.1
ENSMUSG00000010047_Hyal2	6.1	10.72	7.57	7.57	4.5	11.29	15.9	11.29
ENSMUSG00000010048_Ifrd2	2.52	5.57	4.78	4.78	0	2.3	7.24	2.3
ENSMUSG00000010051_Hyal1	3.55	3	2.42	3	6.83	7.96	8.64	7.96
ENSMUSG00000010054_Tusc2	24.47	17.01	35.29	24.47	16.43	20.37	39.65	20.37
ENSMUSG00000010057_Nprl2	8.99	11.47	7.64	8.99	17.52	1.39	5.9	5.9
ENSMUSG00000010064_Slc38a3	7.18	8.53	8.31	8.31	18.59	16.87	11.67	16.87
ENSMUSG00000010066_Cacna2d2	108.41	65.52	70.92	70.92	74.92	54.96	64.87	64.87
ENSMUSG00000010067_Rassf1	3.34	15.18	15.53	15.18	8.08	9.65	16.47	9.65
ENSMUSG00000010080_Epn3	0.77	0.93	1.94	0.93	0.66	5.14	6.74	5.14
ENSMUSG00000010086_Rnf112	26.58	25.7	27.92	26.58	24.51	29.73	32.5	29.73
ENSMUSG00000010095_Slc3a2	45.5	45.75	59.43	45.75	76.55	51.9	26.6	51.9
ENSMUSG00000010097_Nxf1	56.11	28.63	45.72	45.72	37.18	28.17	39.38	37.18
ENSMUSG00000010110_Stx5a	27.78	38.67	32.35	32.35	30.63	23.63	60.96	30.63
ENSMUSG00000010122_Slc47a1	0.1	0.4	0	0.1	0.87	1.65	1.57	1.57
ENSMUSG00000010136_Pifo	0	0	0	0	0	0	1.91	0
ENSMUSG00000010142_Tnfrsf13b	0.59	0.41	0.63	0.59	3.42	3.04	4.32	3.42
ENSMUSG00000010154_Spire2	6.9	2.29	1.9	2.29	3.78	2.5	4.1	3.78
ENSMUSG00000010175_Prox1	8.17	5.44	8.63	8.17	8.23	8.55	7.82	8.23
ENSMUSG00000010205_Raver1	10.29	7.23	7.96	7.96	8.23	9.23	9.43	9.23
ENSMUSG00000010277_2610507B11Rik	53.83	54.8	41.76	53.83	51.2	53.11	52.35	52.35
ENSMUSG00000010290_AI597479	19.61	13.32	11.31	13.32	15.12	13.44	10.73	13.44
ENSMUSG00000010307_Tmem86a	0.87	1.2	2.49	1.2	2.46	4.58	1.78	2.46
ENSMUSG00000010311_Optc	0.79	0.35	0.54	0.54	6.61	8.5	5.26	6.61
ENSMUSG00000010342_Tex14	0.35	1.5	0.89	0.89	1.24	3.95	2.56	2.56
ENSMUSG00000010358_Ifi35	1.02	2.39	1.27	1.27	3.72	4.54	6.81	4.54
ENSMUSG00000010362_Rdm1	4.49	3.77	0	3.77	1.33	4.6	0	1.33
ENSMUSG00000010376_Nedd8	194.46	199.26	190.13	194.46	175.5	259.64	202.85	202.85
ENSMUSG00000010392_Gosr1	74.48	72.72	30.9	72.72	41.92	28.3	53.42	41.92
ENSMUSG00000010406_Mrpl52	70.39	39.98	27.59	39.98	41.32	56.77	34.16	41.32
ENSMUSG00000010435_Spaca7	0	0	0	0	0	0	0	0
ENSMUSG00000010453_Kansl3	22.46	16.76	20.92	20.92	24.77	19.97	26.33	24.77
ENSMUSG00000010461_Eya4	0.07	0.88	0	0.07	1.66	0.32	0.89	0.89
ENSMUSG00000010476_Ebf3	6.98	5.81	7.62	6.98	9.17	8.21	9.33	9.17
ENSMUSG00000010492_Uckl1os	3.96	6.59	5.56	5.56	10.73	34.31	37.8	34.31
ENSMUSG00000010505_Myt1	16.54	14.41	16.77	16.54	26.19	16.94	34.32	26.19
ENSMUSG00000010517_Faf1	30.84	28.2	21.78	28.2	26.5	21.69	13.75	21.69
ENSMUSG00000010529_Gm266	4.49	3.87	2.56	3.87	8.67	8.4	4.29	8.4
ENSMUSG00000010538_Tsacc	2	0	2.92	2	1.95	2.74	0	1.95
ENSMUSG00000010554_Mettl16	24.75	16.04	20.35	20.35	17.92	32.07	27.26	27.26
ENSMUSG00000010592_Dazl	0.17	0.89	0	0.17	3.83	3.89	4.25	3.89
ENSMUSG00000010601_Apol7a	0.77	1.19	0.6	0.77	1.56	4.65	10.59	4.65
ENSMUSG00000010607_Pigyl	58.65	52.69	31.6	52.69	30.11	100.39	55.13	55.13
ENSMUSG00000010608_Rbm25	240.16	150.37	169.39	169.39	214.89	302.98	337.24	302.98
ENSMUSG00000010609_Psen2	10.95	10.92	6.37	10.92	16.5	18.88	30.39	18.88
ENSMUSG00000010651_Acaa1b	0	1.3	0	0	0	4.77	0	0
ENSMUSG00000010660_Plcd1	0.76	1	1.2	1	0.33	1.31	1.19	1.19
ENSMUSG00000010663_Fads1	21.47	18.43	21.05	21.05	19.59	17.06	12.53	17.06
ENSMUSG00000010721_Lmbr1	9.04	5.98	12.25	9.04	8.15	11.77	14.01	11.77
ENSMUSG00000010751_Tnfrsf22	1.21	3.02	0	1.21	10.72	12.24	7.14	10.72
ENSMUSG00000010755_Cars	20.31	22.11	20.86	20.86	28.08	19.53	31.24	28.08
ENSMUSG00000010760_Phlda2	0	0	0	0	0	11.63	11.02	11.02
ENSMUSG00000010796_Asz1	0	1.05	0	0	7.67	2.26	0	2.26
ENSMUSG00000010797_Wnt2	0	1.19	0.72	0.72	2.35	4.15	0	2.35
ENSMUSG00000010803_Gabra1	457.21	438.23	415.46	438.23	424.64	288.09	280.56	288.09
ENSMUSG00000010825_Grid2ip	81.39	56.1	40.09	56.1	80.91	55.46	61.34	61.34
ENSMUSG00000010830_Kdelr3	0.59	0.4	0.3	0.4	0.66	2.63	0	0.66
ENSMUSG00000010841_1700006E09Rik	0	0	0	0	1.58	0	0	0
ENSMUSG00000010911_Apip	33.37	35.41	20.92	33.37	31.64	24.88	16.92	24.88
ENSMUSG00000010914_Pdhx	40.67	32.03	32.85	32.85	33.76	45.94	29.17	33.76
ENSMUSG00000010936_Vac14	10.17	5.69	7.69	7.69	7.42	6.42	7.72	7.42
ENSMUSG00000011008_Mcoln2	0	5.1	0	0	2.93	16.71	11.55	11.55
ENSMUSG00000011034_Slc5a1	10.77	9.49	6.89	9.49	11.18	9.3	8.59	9.3
ENSMUSG00000011052_1700049J03Rik	0	0	0	0	0	0	0	0
ENSMUSG00000011096_Akt1s1	12.03	6.43	5.19	6.43	8.94	47.34	9.37	9.37
ENSMUSG00000011114_Tbrg1	8.77	8.18	10.56	8.77	11.56	10.05	14.92	11.56
ENSMUSG00000011118_Panx3	0	1.26	0	0	3.56	1.84	3.43	3.43
ENSMUSG00000011148_Adssl1	7.25	3.38	4.41	4.41	4.55	5.36	2.74	4.55
ENSMUSG00000011154_Cfap161	3.22	6.48	1.81	3.22	2.12	4.68	3.27	3.27
ENSMUSG00000011158_Brf1	9.87	5.63	8.8	8.8	8.52	7.52	10.82	8.52
ENSMUSG00000011171_Vipr2	13.37	12.73	23.96	13.37	5.38	8.25	14.11	8.25
ENSMUSG00000011179_Odc1	18.34	20.8	16.31	18.34	13.33	14.55	7.94	13.33
ENSMUSG00000011254_Thg1l	4.36	3.46	4.62	4.36	5.87	7.95	11.1	7.95
ENSMUSG00000011256_Adam19	3.23	2.51	2.68	2.68	4.52	6.87	16.93	6.87
ENSMUSG00000011257_Pabpc4	6.38	7.76	8.71	7.76	9.89	7.59	10.29	9.89
ENSMUSG00000011263_Exoc3l2	0.35	0.73	1.11	0.73	0.8	7.98	10.91	7.98
ENSMUSG00000011267_Zfp296	0.18	1.47	0	0.18	1.45	9.82	8.72	8.72
ENSMUSG00000011305_Plin5	0	0.82	0	0	1.35	1.79	1.63	1.63
ENSMUSG00000011306_Sugp1	14.99	17.78	15.02	15.02	10.42	26.59	15.33	15.33
ENSMUSG00000011349_Dmrtc2	0	0.34	0	0	0	0	0	0
ENSMUSG00000011350_Gm5893	0.14	0.58	0	0.14	6.21	6.7	4.98	6.21
ENSMUSG00000011382_Dhdh	8.24	4.04	5.08	5.08	5.72	14.3	13.76	13.76
ENSMUSG00000011427_Zfp790	9.11	9.74	7.69	9.11	14.39	16.88	30.79	16.88
ENSMUSG00000011463_Cpb1	0	1.16	2.94	1.16	2.07	2.64	5.21	2.64
ENSMUSG00000011486_Slc25a41	0	0	0	0	0	2.19	2.98	2.19
ENSMUSG00000011589_Fsd1	5.17	2.21	2.86	2.86	3.63	4.13	3.75	3.75
ENSMUSG00000011632_Pinlyp	0	0	0	0	0	1.65	2.24	1.65
ENSMUSG00000011658_Fuz	11.27	7.71	8.07	8.07	11.12	17.08	13.38	13.38
ENSMUSG00000011751_Sptbn4	36.66	29.25	36.78	36.66	32.9	51.16	37.85	37.85
ENSMUSG00000011752_Pgam1	130.21	99.14	121.1	121.1	93.09	79.09	64.14	79.09
ENSMUSG00000011831_Evi5	48.06	37.73	49.57	48.06	49.24	44.79	51.91	49.24
ENSMUSG00000011832_Evi5l	29.95	30.05	20.74	29.95	24.46	64.54	44.41	44.41
ENSMUSG00000011837_Snapc2	8.72	4.19	7.55	7.55	4.83	5.37	5.85	5.37
ENSMUSG00000011877_Git1	16.27	15.6	15.52	15.6	16.76	23.29	18.38	18.38
ENSMUSG00000011884_Gltp	8.43	3.75	5.91	5.91	6.68	6.82	5.58	6.68
ENSMUSG00000011958_Bnip2	33.39	26.13	36.67	33.39	24.64	24.26	33.02	24.64
ENSMUSG00000011960_Ccnt1	15.99	20.21	20.62	20.21	15.64	21.82	38.96	21.82
ENSMUSG00000012017_Scarf2	0.15	0	0	0	0.52	0.34	0.47	0.47
ENSMUSG00000012042_4930579F01Rik	0	0.35	0	0	4.19	3.48	6.64	4.19
ENSMUSG00000012076_Brms1l	50.38	46.82	40.06	46.82	48.03	53.23	62.12	53.23
ENSMUSG00000012114_Med15	23.05	12.15	15.76	15.76	12.54	11.94	10.94	11.94
ENSMUSG00000012117_Dhdds	15.24	15.14	9.18	15.14	12.14	9.86	15.01	12.14
ENSMUSG00000012123_Aim1l	0.05	4.62	0.54	0.54	3.73	5.97	29	5.97
ENSMUSG00000012126_Ubxn11	4.85	6.84	2.54	4.85	6.64	23.61	29.57	23.61
ENSMUSG00000012187_Mogat1	2.64	12.17	0	2.64	2.83	14.36	26.24	14.36
ENSMUSG00000012211_Tex22	0	1.05	0.8	0.8	0.75	4.99	10.86	4.99
ENSMUSG00000012282_Wnt8a	1.07	0.32	0	0.32	0.52	4.14	3.76	3.76
ENSMUSG00000012296_Tjap1	5.06	4.94	5.13	5.06	2.23	8.95	9.64	8.95
ENSMUSG00000012350_Ehf	1.01	2.71	1.38	1.38	6.01	16.02	27.21	16.02
ENSMUSG00000012396_Nanog	0	1.09	0.37	0.37	2	4.24	3.62	3.62
ENSMUSG00000012405_Rpl15	58.76	76.99	36.98	58.76	61.5	53.63	65.33	61.5
ENSMUSG00000012422_Tmem167	7.94	8.67	7.2	7.94	14.97	6.71	13.08	13.08
ENSMUSG00000012428_Steap4	0	0.66	0.62	0.62	4.1	7.59	4.44	4.44
ENSMUSG00000012429_Mplkip	7.72	5.92	4.01	5.92	5.54	7.17	14.13	7.17
ENSMUSG00000012443_Kif11	0.25	0.84	0.8	0.8	1.75	1.62	1.58	1.62
ENSMUSG00000012483_Rpa3	12.39	7.33	5.55	7.33	11.62	4.5	9.16	9.16
ENSMUSG00000012519_Mlkl	1.32	1.21	0.62	1.21	3.61	2.4	11.12	3.61
ENSMUSG00000012520_Phox2b	0.25	0.69	0	0.25	3.31	7.75	7.75	7.75
ENSMUSG00000012535_Tnpo3	23.74	22.03	21.79	22.03	36.56	27.31	30.75	30.75
ENSMUSG00000012609_Ttll5	222.97	162.9	153.9	162.9	217.59	149.79	249.17	217.59
ENSMUSG00000012640_Zfp715	11.36	12.95	7.72	11.36	16.09	24.22	11.83	16.09
ENSMUSG00000012705_Retn	0.26	1.46	1.18	1.18	3.4	7.68	6.76	6.76
ENSMUSG00000012777_Acpt	0	0	0	0	1.68	1.7	0	1.68
ENSMUSG00000012819_Cdh23	0.97	4.67	0.67	0.97	4.83	18.27	9.49	9.49
ENSMUSG00000012848_Rps5	48.07	43.76	41.1	43.76	19.94	34.45	32.65	32.65
ENSMUSG00000012889_Podnl1	0.58	0.69	0	0.58	2.01	3.04	5.18	3.04
ENSMUSG00000013033_Adgrl1	28.41	32.86	27.65	28.41	31.89	33.02	17.47	31.89
ENSMUSG00000013076_Amotl1	4.9	4.49	3.45	4.49	4.72	5.5	13.24	5.5
ENSMUSG00000013083_2200002J24Rik	0	7.4	0	0	2.04	0	10.54	2.04
ENSMUSG00000013089_Etv5	27.05	23.77	19.13	23.77	16.06	20.94	19.69	19.69
ENSMUSG00000013091_Tmem190	0.67	0	3.61	0.67	0	0	6.72	0
ENSMUSG00000013150_Gfod2	16.21	7.01	7.73	7.73	6.38	8.75	9.51	8.75
ENSMUSG00000013155_Enkd1	1.78	2.74	1.73	1.78	5.96	4.96	1.35	4.96
ENSMUSG00000013158_4933405L10Rik	0.71	0.97	0	0.71	0.79	6.31	4.29	4.29
ENSMUSG00000013160_Atp6v0d1	63.75	58.49	62.82	62.82	42.66	51.45	41.66	42.66
ENSMUSG00000013236_Ptprs	40.3	29.8	33.94	33.94	30.47	29.25	24.53	29.25
ENSMUSG00000013275_Slc41a1	11.89	8.67	10.32	10.32	10.07	15.21	11.34	11.34
ENSMUSG00000013338_Fer1l4	0.12	1.02	0	0.12	3.11	8.04	16.83	8.04
ENSMUSG00000013353_4931406B18Rik	0.75	2.19	2.6	2.19	5.26	12.51	23.79	12.51
ENSMUSG00000013367_Iglon5	15.31	10.28	8.52	10.28	19.41	16.31	27.25	19.41
ENSMUSG00000013415_Igf2bp1	0.11	1.38	0.05	0.11	1.41	4.84	7.03	4.84
ENSMUSG00000013418_B4galnt2	0	0.32	0	0	1.05	0	2.86	1.05
ENSMUSG00000013419_Zfp651	5.19	4.04	3.59	4.04	5.13	12.16	11.61	11.61
ENSMUSG00000013465_Nelfb	16.78	12.17	8.28	12.17	17.06	17.6	13.33	17.06
ENSMUSG00000013483_Card14	0.09	0	0.91	0.09	0.35	4.53	1.78	1.78
ENSMUSG00000013495_Tmem175	11.61	12.86	21.81	12.86	12.66	15.66	23.28	15.66
ENSMUSG00000013523_Bcas1	13.22	7.65	13.62	13.22	18.35	29.32	16.36	18.35
ENSMUSG00000013539_Tango2	25.15	20	27.13	25.15	22.41	37.77	53	37.77
ENSMUSG00000013562_4833413E03Rik	0.5	2.2	0	0.5	3.1	2.09	0	2.09
ENSMUSG00000013584_Aldh1a2	0.79	0.24	2.5	0.79	0.39	2.07	0.7	0.7
ENSMUSG00000013593_Ndufs2	259.14	103.65	186.08	186.08	110.74	166.91	177.53	166.91
ENSMUSG00000013611_Snx31	0.09	0.59	0	0.09	1.62	0.5	1.36	1.36
ENSMUSG00000013622_Atraid	19.7	14.72	23.04	19.7	11.4	11.42	9.16	11.4
ENSMUSG00000013629_Cad	4.47	9.29	2.74	4.47	12.66	19.68	24.76	19.68
ENSMUSG00000013643_Lypd8	0	0.55	0	0	0.89	0	3.24	0.89
ENSMUSG00000013646_Sh3bp5l	11.87	9.93	7.73	9.93	8.05	15.61	16.59	15.61
ENSMUSG00000013653_1810065E05Rik	0	2.03	0	0	2.18	0	0	0
ENSMUSG00000013662_Atad1	28.19	36.23	33.58	33.58	29.02	21.25	15.6	21.25
ENSMUSG00000013663_Pten	41.08	35.1	30.7	35.1	45.46	23.12	28.64	28.64
ENSMUSG00000013668_4933402N03Rik	0	0.3	0.68	0.3	2.47	9.84	4.47	4.47
ENSMUSG00000013698_Pea15a	327.45	287.23	276.27	287.23	193.45	807	386.25	386.25
ENSMUSG00000013701_Timm23	65.51	65.54	42.23	65.51	58.92	54.37	99.15	58.92
ENSMUSG00000013707_Tnfaip8l2	0.52	2.12	0	0.52	2.59	3.46	4.71	3.46
ENSMUSG00000013736_Trnt1	45.71	39.73	38.44	39.73	37.79	38.84	35.7	37.79
ENSMUSG00000013766_Ly6g6e	0	1.88	0	0	0	9.68	9.5	9.5
ENSMUSG00000013787_Ehmt2	19.59	10.5	12.3	12.3	21.77	56.4	31.37	31.37
ENSMUSG00000013822_Elof1	17	11.07	8.37	11.07	11.9	8.3	10.83	10.83
ENSMUSG00000013833_Med16	3.84	4.19	3.81	3.84	4.86	37.98	36.72	36.72
ENSMUSG00000013846_St3gal1	0.77	1.12	0.69	0.77	2.87	7.59	5.48	5.48
ENSMUSG00000013858_Tmem259	18.49	14.31	21.9	18.49	16.38	13.29	11.07	13.29
ENSMUSG00000013878_Rnf170	23.16	21.44	23.01	23.01	20.96	21.41	23.89	21.41
ENSMUSG00000013921_Clip3	454.69	227.65	335.98	335.98	201.49	302.71	228.31	228.31
ENSMUSG00000013928_Thap8	1.25	2.57	0.97	1.25	4.32	7.62	6.76	6.76
ENSMUSG00000013936_Myl2	0	0	0	0	2.85	3.88	0	2.85
ENSMUSG00000013973_Dedd	13.68	5.05	4.04	5.05	4.99	28.14	5.42	5.42
ENSMUSG00000013974_Mcemp1	2.56	3.02	0	2.56	2.48	1.65	6.73	2.48
ENSMUSG00000013997_Nit1	12.99	12.83	9.77	12.83	6.56	16.68	13.21	13.21
ENSMUSG00000014030_Pax5	0.15	0.56	0.24	0.24	8.77	11.27	2.43	8.77
ENSMUSG00000014039_Prdm15	9.34	5.06	16.65	9.34	11.4	10.38	11.9	11.4
ENSMUSG00000014074_Rnf168	15.22	15.71	15.13	15.22	14.18	26.37	16.51	16.51
ENSMUSG00000014075_Tctex1d2	9.69	8.86	14.52	9.69	8.82	2.21	14.95	8.82
ENSMUSG00000014077_Chp1	43.02	30.53	40.42	40.42	39.18	47.22	28.89	39.18
ENSMUSG00000014104_Sval2	0	1.28	0	0	2.02	2.36	0	2.02
ENSMUSG00000014158_Trpv4	0	3.04	0.35	0.35	0.96	3.05	8.37	3.05
ENSMUSG00000014164_Klhl3	7.06	7.26	5.74	7.06	4.92	6.86	10.84	6.86
ENSMUSG00000014177_Tvp23b	7.72	10.74	8.63	8.63	11.41	10.22	24.14	11.41
ENSMUSG00000014195_Dnajc7	125.23	117.18	104.47	117.18	116.14	105.38	114.81	114.81
ENSMUSG00000014198_Zfp385c	59.28	40.67	54.19	54.19	28.95	53.26	43.33	43.33
ENSMUSG00000014226_Cacybp	97.55	78.18	60.71	78.18	74.49	59.57	71.24	71.24
ENSMUSG00000014232_Cluap1	22.94	27.54	27.44	27.44	31.94	22.95	18.4	22.95
ENSMUSG00000014243_Zswim7	7.07	6.47	2.8	6.47	2.96	9.95	8.11	8.11
ENSMUSG00000014245_Pigl	2.84	1.24	2.24	2.24	2.04	2.16	6.83	2.16
ENSMUSG00000014294_Ndufa2	142.57	111.48	124.64	124.64	68.81	99.06	88.3	88.3
ENSMUSG00000014301_Pam16	63.5	27.47	34.91	34.91	33.39	23.34	28.89	28.89
ENSMUSG00000014303_Glis2	2.59	7.01	1.59	2.59	8.68	9.76	4.52	8.68
ENSMUSG00000014313_Cox6c	2787.23	2550.4	2068.94	2550.4	1542.11	1679.54	1506.74	1542.11
ENSMUSG00000014329_Bicc1	1.39	1.44	0.66	1.39	2.21	7.31	6.55	6.55
ENSMUSG00000014349_Ube2z	9.19	9.76	10.96	9.76	7.45	8.16	11.9	8.16
ENSMUSG00000014351_Gip	0	0	0	0	0	0	0	0
ENSMUSG00000014353_Tmem87b	15.64	19.44	23.46	19.44	9.34	9.56	11.58	9.56
ENSMUSG00000014355_Anapc1	27.43	48.55	34.36	34.36	49.95	25.42	54.54	49.95
ENSMUSG00000014361_Mertk	11.2	10.82	13.63	11.2	8.28	10.06	11.37	10.06
ENSMUSG00000014402_Tsg101	39.02	31.34	27.19	31.34	38.78	26.23	35.15	35.15
ENSMUSG00000014418_Hps5	25.03	8.91	29.47	25.03	18.11	34.24	15.11	18.11
ENSMUSG00000014426_Map3k4	18.04	11.65	15.8	15.8	11.89	15.72	15.71	15.71
ENSMUSG00000014444_Piezo1	1.57	7.66	1.05	1.57	3.11	18	26.28	18
ENSMUSG00000014453_Blk	0	0.43	0	0	0	2.35	0.64	0.64
ENSMUSG00000014470_Rnf166	16.83	11.11	8.63	11.11	8.12	18.18	16.52	16.52
ENSMUSG00000014496_Ankrd28	8.24	11.83	9.45	9.45	10.46	6.8	9.28	9.28
ENSMUSG00000014498_Ankrd52	11.24	9.9	9.58	9.9	11.71	11.8	11.86	11.8
ENSMUSG00000014503_Pkd2l2	0	0.68	0.65	0.65	0.83	0	0	0
ENSMUSG00000014504_Srp19	67.93	90.27	59.43	67.93	34.52	71.1	27.82	34.52
ENSMUSG00000014529_Tmbim7	0	0.72	0	0	2.24	3.65	1.81	2.24
ENSMUSG00000014542_Clec4f	0.1	0.64	0	0.1	1.42	2.35	3.84	2.35
ENSMUSG00000014543_Klra17	0.24	0	0	0	1.65	0	0	0
ENSMUSG00000014547_Wdfy2	2.76	2.43	5.3	2.76	2.98	1.37	1.21	1.37
ENSMUSG00000014550_Rbsn	12.53	13.29	12.17	12.53	18	31.23	29.72	29.72
ENSMUSG00000014551_Mrps25	32.9	30.43	29.38	30.43	18.73	35.77	23.24	23.24
ENSMUSG00000014554_Dguok	14.82	12.63	12.48	12.63	10.12	7.67	17.31	10.12
ENSMUSG00000014592_Camta1	81.68	51.1	56.24	56.24	54.41	84.37	72.73	72.73
ENSMUSG00000014599_Csf1	3.8	4.3	1.15	3.8	15.63	18.53	11.19	15.63
ENSMUSG00000014601_Strip1	14.31	18.08	18.11	18.08	18.72	15.57	23.12	18.72
ENSMUSG00000014602_Kif1a	198.59	169.82	258.99	198.59	169.49	123.75	117.37	123.75
ENSMUSG00000014603_Alx3	0.28	0	0	0	1.92	1.91	0.87	1.91
ENSMUSG00000014606_Slc25a11	21.95	17.54	10.11	17.54	16.25	20.5	17.3	17.3
ENSMUSG00000014609_Chrne	0.84	0	0	0	12.1	6.6	10.53	10.53
ENSMUSG00000014633_Cmc2	3.01	11.84	14.69	11.84	12.07	13.17	6.91	12.07
ENSMUSG00000014668_Chfr	45.53	42.61	41.8	42.61	26.73	41.63	83.84	41.63
ENSMUSG00000014686_Ceacam16	0.33	0.34	0	0.33	0.56	0.74	1.01	0.74
ENSMUSG00000014704_Hoxa2	0	1.24	0	0	1.02	4.74	8.3	4.74
ENSMUSG00000014725_Adam28	0	0.67	0	0	1.13	0.38	1.55	1.13
ENSMUSG00000014747_Ankrd53	2.48	2.35	0.35	2.35	1.57	4.07	2.78	2.78
ENSMUSG00000014748_Tex261	61.1	66.1	52.78	61.1	47.54	36.11	42.43	42.43
ENSMUSG00000014763_Fam120b	24.04	14.34	15.78	15.78	16.11	10.15	18.23	16.11
ENSMUSG00000014767_Tbp	29.63	31.36	27.12	29.63	41.82	21.51	23.12	23.12
ENSMUSG00000014769_Psmb1	63.38	93.2	91.31	91.31	55.18	44.48	64	55.18
ENSMUSG00000014771_Pdcd2	22.82	24.85	8.7	22.82	22.51	8.99	7.54	8.99
ENSMUSG00000014773_Dll1	2.35	5.46	5.6	5.46	14.21	25.44	34.76	25.44
ENSMUSG00000014776_Nol3	2.7	1.86	1.17	1.86	5.27	8.74	6.9	6.9
ENSMUSG00000014778_Fhod1	1.74	1.78	0.18	1.74	5.63	6.05	10.13	6.05
ENSMUSG00000014782_Plekhg4	1.08	1.04	1.13	1.08	0.7	18.42	1.89	1.89
ENSMUSG00000014786_Slc9a5	3.35	4.85	2.79	3.35	6.44	6.17	4.35	6.17
ENSMUSG00000014791_Elmo3	0.73	1.71	1.29	1.29	0.85	1.87	0.51	0.85
ENSMUSG00000014813_Stc1	0.07	0.69	0.1	0.1	1.82	4.52	7.4	4.52
ENSMUSG00000014837_4931428F04Rik	3.93	3.93	4.06	3.93	5.89	10.17	4.12	5.89
ENSMUSG00000014846_Tppp3	16.25	19.97	27.96	19.97	21.19	15.7	15.61	15.7
ENSMUSG00000014850_Msh3	35.92	30.39	22.21	30.39	23.22	58.37	47.3	47.3
ENSMUSG00000014852_Adamts13	0.64	1.52	0	0.64	2.42	1.4	11.1	2.42
ENSMUSG00000014856_Tmem208	9.98	20.4	12.22	12.22	22.32	15.9	0	15.9
ENSMUSG00000014859_E2f4	22.23	14.44	10.71	14.44	11.67	21.42	12.98	12.98
ENSMUSG00000014867_Surf4	15.42	12.03	9.09	12.03	11.01	7.97	11.34	11.01
ENSMUSG00000014873_Surf2	26.31	31.89	22.74	26.31	23.95	23.36	22.79	23.36
ENSMUSG00000014905_Dnajb9	29.34	33.45	29.49	29.49	22.2	17.93	20.07	20.07
ENSMUSG00000014907_Naf1	6.65	5.77	5.68	5.77	4.63	6.51	4.17	4.63
ENSMUSG00000014932_Yes1	19.11	22.32	22.97	22.32	26	15.71	19.09	19.09
ENSMUSG00000014956_Ppp1cb	96.61	142.43	99.98	99.98	102.17	73.7	86.14	86.14
ENSMUSG00000014959_Gorasp2	29.72	17.98	19.34	19.34	16.58	33.11	23.1	23.1
ENSMUSG00000014980_Tsen15	22.51	22.28	24.05	22.51	30.11	28.37	21.62	28.37
ENSMUSG00000015001_Oc90	0.55	0.35	0	0.35	6.65	6.77	2.07	6.65
ENSMUSG00000015002_Efr3a	280.45	191.47	149.6	191.47	186.51	153.77	134.58	153.77
ENSMUSG00000015013_Trappc2l	19.03	14.54	18.35	18.35	1.91	12.95	10.55	10.55
ENSMUSG00000015016_Acsf3	6.52	3.89	3.68	3.89	6.82	7.98	2.17	6.82
ENSMUSG00000015023_Ddx19a	22.32	18.29	16.92	18.29	22.17	33.62	16.09	22.17
ENSMUSG00000015027_Galns	0.98	0.82	1.24	0.98	0.68	1.79	2.44	1.79
ENSMUSG00000015053_Gata2	1.1	1.19	1	1.1	3.93	8.09	11.52	8.09
ENSMUSG00000015083_C8g	0.9	2.38	0	0.9	0.84	1.12	2.24	1.12
ENSMUSG00000015085_Entpd2	0.9	1.54	3.5	1.54	2.54	8.75	9.17	8.75
ENSMUSG00000015087_Rabl6	80.74	54.46	95.79	80.74	60.92	99.17	72.72	72.72
ENSMUSG00000015090_Ptgds	50.1	45.67	32.5	45.67	33.93	10.35	15.02	15.02
ENSMUSG00000015092_Edf1	276.59	186.6	261.55	261.55	154.9	498.19	181.74	181.74
ENSMUSG00000015093_Clic3	0	1.84	0	0	2.21	3.96	4.02	3.96
ENSMUSG00000015094_Npdc1	57.09	51.65	44.28	51.65	49.54	39.86	33.25	39.86
ENSMUSG00000015095_Fbxw5	16.74	11.85	12.98	12.98	9.1	13.89	24.54	13.89
ENSMUSG00000015112_Slc25a13	0.99	1.98	2.8	1.98	4.06	1.49	10.64	4.06
ENSMUSG00000015120_Ube2i	82.18	49.6	61.73	61.73	62.46	43.72	89.01	62.46
ENSMUSG00000015126_Tsr3	10.63	12.8	5.6	10.63	15.23	9.65	8.76	9.65
ENSMUSG00000015127_Unkl	9.35	8.04	3.89	8.04	15.89	8.45	19.8	15.89
ENSMUSG00000015133_Lrrk1	1.83	4.63	0.82	1.83	3.47	25.42	8.87	8.87
ENSMUSG00000015134_Aldh1a3	1.04	3.82	1.31	1.31	2.23	4.61	1.35	2.23
ENSMUSG00000015143_Actn1	5.39	4.18	4.41	4.41	3.27	3.75	7.67	3.75
ENSMUSG00000015149_Sirt2	39.76	41.48	34.76	39.76	40.23	40.58	46.6	40.58
ENSMUSG00000015165_Hnrnpl	90.68	59.09	71.41	71.41	96.36	87.24	94.53	94.53
ENSMUSG00000015176_Nolc1	23.31	16.48	17.06	17.06	19.53	33.59	21.64	21.64
ENSMUSG00000015189_Casd1	28.36	25.43	30.49	28.36	24.74	28.59	18.06	24.74
ENSMUSG00000015202_Cnksr3	10.28	9.9	13.99	10.28	12.45	9.53	11.22	11.22
ENSMUSG00000015214_Mtmr1	27.09	30.61	26.67	27.09	37.42	29.52	16.08	29.52
ENSMUSG00000015217_Hmgb3	27.65	25.89	20.76	25.89	19.94	48.43	23.91	23.91
ENSMUSG00000015222_Map2	288.52	233.79	237.15	237.15	257.16	274.47	258.05	258.05
ENSMUSG00000015224_Cyp2j9	79.03	59.01	75.34	75.34	66.29	39.64	53.34	53.34
ENSMUSG00000015242_Nipsnap3a	0	0.54	0	0	0	0	0	0
ENSMUSG00000015243_Abca1	13.26	13.66	10.68	13.26	15.55	11.69	9.43	11.69
ENSMUSG00000015247_Nipsnap3b	3.15	2.39	0	2.39	6.55	0	0	0
ENSMUSG00000015289_Lage3	3.73	0.82	4.92	3.73	6.86	3.67	11.82	6.86
ENSMUSG00000015290_Ubl4a	19.17	15.31	12.19	15.31	13.52	20.76	9.42	13.52
ENSMUSG00000015291_Gdi1	226.11	176.26	198.38	198.38	187.55	275.6	165.59	187.55
ENSMUSG00000015305_Sash1	18.84	13.74	16.82	16.82	14.15	17.74	17.31	17.31
ENSMUSG00000015312_Gadd45b	4.93	0.92	1.74	1.74	5.25	2.99	2.72	2.99
ENSMUSG00000015314_Slamf6	0.77	5.73	1.28	1.28	17.63	31.32	62.09	31.32
ENSMUSG00000015316_Slamf1	0.09	2.4	1.53	1.53	5.47	6.3	9.08	6.3
ENSMUSG00000015335_Zdhhc12	3.23	1.52	0	1.52	4.56	10.75	13.57	10.75
ENSMUSG00000015337_Endog	5.31	7.27	4.73	5.31	0	1.8	6.83	1.8
ENSMUSG00000015340_Cybb	0.1	1.07	0.16	0.16	2.36	0.7	5.25	2.36
ENSMUSG00000015341_Golga7	35.99	25.75	28.91	28.91	27.44	37.61	35.19	35.19
ENSMUSG00000015342_Xk	9.78	9.7	8.69	9.7	9.46	6.36	6.88	6.88
ENSMUSG00000015354_Pcolce2	0.54	1.27	0.26	0.54	1.53	2.52	2.41	2.41
ENSMUSG00000015355_Cd48	0	1.36	1.54	1.36	0	2.94	0	0
ENSMUSG00000015357_Clpx	27.88	22.65	20.32	22.65	32.53	17.86	17.03	17.86
ENSMUSG00000015363_Trabd	8.07	6.8	10.92	8.07	10.37	8.41	11.63	10.37
ENSMUSG00000015365_Mov10l1	0	0.76	0	0	18.39	2.65	35.34	18.39
ENSMUSG00000015377_Dennd6b	4.29	5.86	5.68	5.68	9.73	7.27	6.95	7.27
ENSMUSG00000015396_Cd83	1.68	1.76	1.14	1.68	4.97	1.1	2.99	2.99
ENSMUSG00000015401_Tmem27	0	0	0	0	0.75	1	0	0.75
ENSMUSG00000015405_Ace2	0.14	0.76	0.8	0.76	2.26	1.66	1.92	1.92
ENSMUSG00000015437_Gzmb	0.19	2.01	0	0.19	3.94	2.62	1.19	2.62
ENSMUSG00000015441_Gzmf	0	0.69	0	0	0	0	2.04	0
ENSMUSG00000015443_Gzmn	0	0	0	0	1.05	1.41	5.75	1.41
ENSMUSG00000015451_C4a	0.4	0.88	0	0.4	2.82	8.84	7.43	7.43
ENSMUSG00000015452_Ager	0	0.69	0	0	1.61	3.71	3.06	3.06
ENSMUSG00000015461_Atf6b	11.18	12.98	7.01	11.18	14.31	9.47	8	9.47
ENSMUSG00000015467_Egfl8	0.66	2.29	0	0.66	3.05	9.82	1.14	3.05
ENSMUSG00000015468_Notch4	1.81	3.58	1.81	1.81	10.7	4.73	11.03	10.7
ENSMUSG00000015474_Ppt2	14.84	7.4	11.64	11.64	9.37	19.49	10.24	10.24
ENSMUSG00000015476_Prrt1	65.14	32.37	57.28	57.28	30.22	52.94	35.03	35.03
ENSMUSG00000015478_Rnf5	40.89	25.47	31.58	31.58	21.96	101.47	42.91	42.91
ENSMUSG00000015484_Fam163a	0.38	1.06	0.2	0.38	2.41	6.67	6.33	6.33
ENSMUSG00000015488_Cacfd1	17.39	10.9	4.67	10.9	7.97	11.83	8.71	8.71
ENSMUSG00000015501_Hivep2	31.39	27.78	39.07	31.39	35.14	37.67	32.86	35.14
ENSMUSG00000015519_2310057J18Rik	0	0.58	0	0	0.94	1.26	2.33	1.26
ENSMUSG00000015522_Arnt	30.17	25.79	17.65	25.79	37.61	18.89	30.07	30.07
ENSMUSG00000015533_Itga2	0.29	0.12	0	0.12	0.4	1.33	1.09	1.09
ENSMUSG00000015536_Mocs2	31.98	56.81	37.33	37.33	32.7	31.06	25.62	31.06
ENSMUSG00000015542_Nat9	5.06	4.88	8.53	5.06	16.38	21.83	4.33	16.38
ENSMUSG00000015568_Lpl	0.8	2.17	1	1	6.27	5.72	8.64	6.27
ENSMUSG00000015575_Atp6v0e	28.93	30.01	22.21	28.93	36.13	33.29	26.62	33.29
ENSMUSG00000015579_Nkx2-5	0	0.74	0	0	0	3.22	3.29	3.22
ENSMUSG00000015597_Zfp318	42.94	22.79	38.58	38.58	50.94	44.6	46.46	46.46
ENSMUSG00000015599_Ttbk1	9.11	5.84	5.66	5.84	6.35	12.34	9.71	9.71
ENSMUSG00000015605_Srf	4.57	2.25	3.03	3.03	4.57	4.39	4.12	4.39
ENSMUSG00000015619_Gata3	0.15	0.89	0.12	0.15	2.9	6.13	5.31	5.31
ENSMUSG00000015627_Gata5	0.08	0.48	0.6	0.48	0.79	3.12	3.31	3.12
ENSMUSG00000015647_Lama5	0.53	1.82	0.72	0.72	5.75	0.38	0.13	0.38
ENSMUSG00000015652_Steap1	0	0	0	0	9.19	2.07	1.41	2.07
ENSMUSG00000015653_Steap2	64.11	53.28	45.18	53.28	49.66	43.83	41.94	43.83
ENSMUSG00000015656_Hspa8	1971.61	1853.59	1700.89	1853.59	1375.95	1326.39	1284.59	1326.39
ENSMUSG00000015659_Serac1	10.75	17.06	11.78	11.78	11.51	21.2	25.52	21.2
ENSMUSG00000015665_Awat1	0	0.41	0	0	0.67	1.79	0	0.67
ENSMUSG00000015668_Pdzd11	28.99	27.17	19.56	27.17	17.55	31.74	9.43	17.55
ENSMUSG00000015671_Psma2	48.82	58.66	51.85	51.85	55.45	27.11	17.47	27.11
ENSMUSG00000015672_Mrpl32	26.75	32.01	29.46	29.46	47.16	13.05	17.74	17.74
ENSMUSG00000015697_Setdb1	12.6	13.1	17.38	13.1	16.77	18.18	21.87	18.18
ENSMUSG00000015702_Anxa9	0.43	0.89	1.34	0.89	2.43	3.87	6.16	3.87
ENSMUSG00000015709_Arnt2	16.3	12.32	19.93	16.3	18.85	46.11	14.07	18.85
ENSMUSG00000015711_Prune	5.66	7.09	4.89	5.66	12.08	13.99	14.21	13.99
ENSMUSG00000015714_Cers2	8.78	8.79	6.59	8.78	12.65	19.36	24.5	19.36
ENSMUSG00000015721_Nlrp5	0.11	1.96	0	0.11	3.09	6.62	14.35	6.62
ENSMUSG00000015733_Capza2	81.12	94.87	72.24	81.12	69.85	55.24	77.62	69.85
ENSMUSG00000015745_Plekho1	31.51	21.19	32.95	31.51	22.58	35.95	25.99	25.99
ENSMUSG00000015747_Vps45	16.01	19.94	39.3	19.94	40.98	11.05	6.21	11.05
ENSMUSG00000015748_Prpf3	20.81	13.47	30.68	20.81	26.49	20.21	23.94	23.94
ENSMUSG00000015749_Anp32e	146.13	142.11	115.52	142.11	124.85	229.75	215.79	215.79
ENSMUSG00000015750_Aph1a	4.07	4.03	4.57	4.07	6.2	27.24	34.95	27.24
ENSMUSG00000015755_Tab2	33.08	33.64	31.79	33.08	31.55	36.94	41.55	36.94
ENSMUSG00000015757_Ppil4	36.89	30.61	24.93	30.61	30.79	26.6	30.57	30.57
ENSMUSG00000015759_Cnih1	25.76	26.98	22.62	25.76	24.84	24.16	13.16	24.16
ENSMUSG00000015766_Eps8	71.83	49.46	59.35	59.35	37.95	92.22	45	45
ENSMUSG00000015776_Med22	8.75	3.98	6.17	6.17	5.2	9.31	21.03	9.31
ENSMUSG00000015787_Abo	0	0.61	0	0	0	5.29	2.76	2.76
ENSMUSG00000015790_Surf1	34.13	22.39	20.51	22.39	17.71	31.6	56.94	31.6
ENSMUSG00000015804_Med28	88.31	41.67	44.27	44.27	55.7	59.11	29.18	55.7
ENSMUSG00000015806_Qdpr	43.12	27.36	16.61	27.36	23.73	36.32	49.96	36.32
ENSMUSG00000015812_Gnrh1	1.66	4.62	0	1.66	0	0	0	0
ENSMUSG00000015829_Tnr	22.6	18.4	29.36	22.6	17.19	19.22	21.14	19.22
ENSMUSG00000015837_Sqstm1	104.31	94.35	114.62	104.31	88.2	136.17	130.41	130.41
ENSMUSG00000015839_Nfe2l2	9.22	10.79	10.1	10.1	10.98	10.37	6.4	10.37
ENSMUSG00000015843_Rxrg	0	0.77	0	0	0.84	1.68	4.06	1.68
ENSMUSG00000015846_Rxra	3.87	3.32	3.59	3.59	2.75	5.32	7.44	5.32
ENSMUSG00000015850_Adamtsl4	7.37	0.27	0.91	0.91	0.88	8.64	3.99	3.99
ENSMUSG00000015852_Fcrls	0.23	0.96	0.71	0.71	2.33	6.4	4.21	4.21
ENSMUSG00000015854_Cd5l	0.13	1.6	1.41	1.41	0.88	5.23	3.96	3.96
ENSMUSG00000015869_Prpsap1	37.34	49.75	28.3	37.34	40.37	34.86	46.74	40.37
ENSMUSG00000015879_Fam184b	16.2	12.68	10.58	12.68	16.35	14.65	15.8	15.8
ENSMUSG00000015880_Ncapg	0.91	3.28	0.35	0.91	3.89	5.97	6.02	5.97
ENSMUSG00000015882_Lcorl	17.42	21.46	23.58	21.46	21.74	20.8	35.79	21.74
ENSMUSG00000015889_Lta4h	20.95	16.75	22.74	20.95	17.68	16.01	14.02	16.01
ENSMUSG00000015890_Amdhd1	0.1	0.66	0	0.1	0.73	0.96	0	0.73
ENSMUSG00000015932_Dstn	77.21	84.22	63.64	77.21	67.65	56.09	41.62	56.09
ENSMUSG00000015937_H2afy	79.4	44.45	46.05	46.05	63.81	82.33	56.42	63.81
ENSMUSG00000015942_Gtf2ird2	7.59	12.46	5.62	7.59	11.9	11.96	8.91	11.9
ENSMUSG00000015943_Bola1	22.88	11.73	8.22	11.73	10.43	22.51	18.18	18.18
ENSMUSG00000015944_Gatsl2	8.91	7.28	15.78	8.91	9.72	10.89	11.8	10.89
ENSMUSG00000015947_Fcgr1	0.88	1.16	1.54	1.16	0.34	2.68	3.05	2.68
ENSMUSG00000015950_Ncf1	1.02	1.99	0.59	1.02	4.31	16.45	3.15	4.31
ENSMUSG00000015957_Wnt11	0	2.04	0	0	3.18	0.66	9.88	3.18
ENSMUSG00000015961_Adss	35.99	37.46	36.07	36.07	34.81	26.13	44.12	34.81
ENSMUSG00000015962_1700016C15Rik	0	0	0	0	0	0	0	0
ENSMUSG00000015966_Il17rb	1.88	2.05	0.81	1.88	4.41	4.13	4.9	4.41
ENSMUSG00000015968_Cacna1d	7.51	6.88	8.65	7.51	5.99	8.16	9	8.16
ENSMUSG00000015970_Chdh	1.27	0.99	1.49	1.27	2.24	15.22	2.6	2.6
ENSMUSG00000015971_Actr8	19.85	15.25	17.67	17.67	12.57	21.1	12.11	12.57
ENSMUSG00000015980_Lrrc27	2.12	2.49	5.31	2.49	7.32	3.92	11.58	7.32
ENSMUSG00000015981_Stk32c	0.82	0	0	0	1.61	2.66	4.32	2.66
ENSMUSG00000015994_Fnta	42.08	33.56	25.36	33.56	32.16	38.22	33.85	33.85
ENSMUSG00000016018_Skiv2l2	35.77	39.7	30.11	35.77	32.2	24.05	21.08	24.05
ENSMUSG00000016024_Lbp	0	0	1	0	6.92	8.83	10.56	8.83
ENSMUSG00000016028_Celsr1	0.17	0.27	0.2	0.2	0.07	1.38	1.34	1.34
ENSMUSG00000016087_Fli1	0.07	0.31	0.95	0.31	3.44	8.28	10.38	8.28
ENSMUSG00000016128_Stard13	9.04	14.29	7.08	9.04	22.61	33.2	33.82	33.2
ENSMUSG00000016150_Tenm1	48.11	41.34	52.1	48.11	37.95	27.02	30.5	30.5
ENSMUSG00000016179_Camk1g	4.31	2.59	2.11	2.59	5.91	4.22	5.13	5.13
ENSMUSG00000016181_Diexf	5.6	6.04	8.2	6.04	11.15	19.39	8.92	11.15
ENSMUSG00000016194_Hsd11b1	43.25	51.16	62.44	51.16	45.65	36.24	60.36	45.65
ENSMUSG00000016200_Syt14	12.21	11.58	8.3	11.58	16.4	13.58	10.19	13.58
ENSMUSG00000016206_H2-M3	0.77	0.79	0	0.77	0.65	4.3	1.17	1.17
ENSMUSG00000016239_Lonrf3	8.4	7.54	6.81	7.54	10.67	11.03	7.46	10.67
ENSMUSG00000016252_Atp5e	92.8	75.89	47.01	75.89	56.06	57.34	84.99	57.34
ENSMUSG00000016253_Nelfcd	10.72	7.89	13.16	10.72	14.09	19.8	11.19	14.09
ENSMUSG00000016255_Tubb1	0.2	0.81	0	0.2	0	2.65	2.41	2.41
ENSMUSG00000016256_Ctsz	13	7.49	7.45	7.49	9.03	10.3	16.36	10.3
ENSMUSG00000016257_Slmo2	25.41	35.08	36.26	35.08	25.97	41.1	41.26	41.1
ENSMUSG00000016262_Sertad4	2	2.7	2.11	2.11	2.79	6.28	7.56	6.28
ENSMUSG00000016283_H2-M2	0.35	2.9	1.64	1.64	2.38	4.73	7.9	4.73
ENSMUSG00000016308_Ube2a	22.14	20	28.64	22.14	14.51	20.61	11.13	14.51
ENSMUSG00000016319_Slc25a5	97.06	117.86	118.09	117.86	103.15	70.02	43.18	70.02
ENSMUSG00000016327_Atp1b4	0.23	0.12	0	0.12	1.62	2.14	4.75	2.14
ENSMUSG00000016344_Ppdpf	69.82	62.5	39.96	62.5	42	34.44	22.93	34.44
ENSMUSG00000016346_Kcnq2	24.27	23.62	23.22	23.62	25.44	35.12	36.99	35.12
ENSMUSG00000016349_Eef1a2	389.69	266.19	325.73	325.73	223.33	264.97	219.94	223.33
ENSMUSG00000016356_Col20a1	0.55	0.12	0.2	0.2	1.74	0	0.79	0.79
ENSMUSG00000016382_Pls3	91.18	75.02	67.16	75.02	64.39	46.94	63.11	63.11
ENSMUSG00000016386_Mpped2	7.73	5.71	2.97	5.71	9.08	6.45	5.5	6.45
ENSMUSG00000016409_Nkap	27.52	30.08	47.5	30.08	33.99	49.85	27.3	33.99
ENSMUSG00000016427_Ndufa1	177.01	170	204.24	177.01	106.29	127.81	121.66	121.66
ENSMUSG00000016458_Wt1	0.09	1.44	0.28	0.28	2.9	1.79	7.68	2.9
ENSMUSG00000016477_E2f3	15.65	2.82	91.71	15.65	3.95	57.17	38.49	38.49
ENSMUSG00000016481_Cr1l	23.66	23.85	13.47	23.66	34.26	21.26	30.24	30.24
ENSMUSG00000016487_Ppfibp1	3.59	10.57	7.92	7.92	25.7	15.99	38.07	25.7
ENSMUSG00000016493_Cd46	3.75	5.35	3.36	3.75	7	2.6	7.36	7
ENSMUSG00000016494_Cd34	1.98	6.11	2.57	2.57	14.27	20.49	24.23	20.49
ENSMUSG00000016495_Plgrkt	13.83	26.48	21.96	21.96	17.51	41.2	15.18	17.51
ENSMUSG00000016496_Cd274	0.14	1	0.43	0.43	2.83	1.87	5.11	2.83
ENSMUSG00000016498_Pdcd1lg2	0	2.37	0	0	1.67	4.42	4.02	4.02
ENSMUSG00000016503_Gtf3a	7.8	6.49	8.17	7.8	8.59	6.14	4.91	6.14
ENSMUSG00000016510_Mtif3	28.77	17.83	10.61	17.83	21.65	26.56	18.69	21.65
ENSMUSG00000016520_Lnx2	11.63	9.29	20.11	11.63	9.59	5.89	3.68	5.89
ENSMUSG00000016524_Il19	1.08	0.6	0	0.6	0	0	0	0
ENSMUSG00000016526_Dyrk3	5.49	4.16	1.37	4.16	6.53	6.49	5.9	6.49
ENSMUSG00000016528_Mapkapk2	16.45	11.4	14.03	14.03	12.16	14.48	8.78	12.16
ENSMUSG00000016529_Il10	0	0.88	0	0	0	0.96	0	0
ENSMUSG00000016534_Lamp2	44.71	56.39	30.48	44.71	56.98	26.66	32.01	32.01
ENSMUSG00000016541_Atxn10	58.67	58.36	46.41	58.36	63.73	29.74	32.04	32.04
ENSMUSG00000016552_Foxred2	4.15	4.05	4.05	4.05	8	9.28	8.95	8.95
ENSMUSG00000016554_Eif3d	52.56	32.84	42.53	42.53	36.66	39.91	23.8	36.66
ENSMUSG00000016559_H3f3b	100.78	86.97	99.08	99.08	93.34	92.42	99.41	93.34
ENSMUSG00000016619_Nup50	13.45	11.6	11.6	11.6	12.82	14.59	19.9	14.59
ENSMUSG00000016624_Phf21b	8.91	6.24	4.39	6.24	14.68	8.66	18.56	14.68
ENSMUSG00000016626_Nlrp14	0	0.32	0	0	2.58	1.56	1.42	1.56
ENSMUSG00000016637_Ift27	37.91	32.59	30.13	32.59	25.45	32.71	23.14	25.45
ENSMUSG00000016664_Pacsin2	24.09	18.41	20.77	20.77	32.32	17.74	20.44	20.44
ENSMUSG00000016756_Cmah	0.18	1.38	0.2	0.2	1.5	4.3	4.92	4.3
ENSMUSG00000016757_Ttll12	5.14	4.14	1.07	4.14	6.87	5.07	2.41	5.07
ENSMUSG00000016758_Bik	0	1.32	0	0	1.07	5.72	0	1.07
ENSMUSG00000016763_Scube1	0.44	0.94	1.14	0.94	1.35	3.77	2.89	2.89
ENSMUSG00000016831_Tox4	11.59	11.23	8.75	11.23	13.13	8.31	27.89	13.13
ENSMUSG00000016833_Mrps18c	42.41	26.51	65.62	42.41	27.63	29.71	24.57	27.63
ENSMUSG00000016918_Sulf1	21.95	24.03	10.72	21.95	26.87	18.56	37.82	26.87
ENSMUSG00000016921_Srsf6	29.5	23.53	27.47	27.47	31.66	21.77	19.17	21.77
ENSMUSG00000016933_Plcg1	46.45	25.38	20.05	25.38	48.57	77.54	58.94	58.94
ENSMUSG00000016940_Kctd2	47.4	32.18	42.97	42.97	31.49	37.92	22.47	31.49
ENSMUSG00000016942_Tmprss6	0	0.33	0.37	0.33	0	0.71	0	0
ENSMUSG00000016946_Kctd5	25.35	14.59	12.66	14.59	18.32	25.1	22.7	22.7
ENSMUSG00000016982_Pom121l2	0	1.34	1.07	1.07	1.17	4.28	5.83	4.28
ENSMUSG00000016984_Etaa1	6.02	4.89	6.47	6.02	7.51	3.75	5.12	5.12
ENSMUSG00000016995_Matn4	0.24	2.03	1.04	1.04	4.62	6.88	11.25	6.88
ENSMUSG00000016998_Svs4	0	0.93	0	0	0	5.98	0	0
ENSMUSG00000017000_Svs6	0	0	0	0	0	3.14	0	0
ENSMUSG00000017002_Slpi	0	0	0	0	0	7.89	0	0
ENSMUSG00000017003_Svs3a	0	0	0	0	2.16	0	0	0
ENSMUSG00000017004_Svs5	1.2	0	0	0	1.82	4.93	13.39	4.93
ENSMUSG00000017007_Rbpjl	0.15	1.32	0.23	0.23	2.95	9.49	10.75	9.49
ENSMUSG00000017009_Sdc4	106.35	71.34	69.18	71.34	60.81	92.51	85.64	85.64
ENSMUSG00000017049_Ccdc70	0.64	0.57	0	0.57	2.09	5.58	5.69	5.58
ENSMUSG00000017057_Il13ra1	0.33	0.14	0.42	0.33	1.15	1.52	1.24	1.24
ENSMUSG00000017064_Prl5a1	0.28	0	0	0	0.92	4.94	6.72	4.94
ENSMUSG00000017119_Nbr1	68.39	74.46	59.92	68.39	65.49	62.24	61.43	62.24
ENSMUSG00000017132_Cyth1	24.63	12.98	27.54	24.63	52.63	24.05	29.82	29.82
ENSMUSG00000017144_Rnd3	1.41	3.65	0.27	1.41	5.42	4.71	1.61	4.71
ENSMUSG00000017146_Brca1	3.95	19.81	0.29	3.95	6.87	16.72	29.24	16.72
ENSMUSG00000017165_Gast	0	0	0	0	0	0	0	0
ENSMUSG00000017167_Cntnap1	15.28	11.35	17.22	15.28	9.73	12.48	12.8	12.48
ENSMUSG00000017176_Nt5c3b	25.09	23.36	27.78	25.09	27.91	33.57	33.57	33.57
ENSMUSG00000017188_Coa3	21.8	15.02	13.53	15.02	9.23	17.53	6.31	9.23
ENSMUSG00000017195_Zpbp2	0.34	1.41	0	0.34	1.16	1.02	3.16	1.16
ENSMUSG00000017204_Gsdma	0	0.19	0	0	0.64	0.85	1.15	0.85
ENSMUSG00000017210_Med24	14.93	23.39	10.67	14.93	17.32	31.42	22.38	22.38
ENSMUSG00000017211_Gsdma2	0	2.72	0.89	0.89	8.65	11.3	13.3	11.3
ENSMUSG00000017221_Psmd3	32.72	20.37	17.74	20.37	15.4	19.35	23.98	19.35
ENSMUSG00000017264_Exosc10	13.49	14.55	13.66	13.66	15.54	16.07	13.49	15.54
ENSMUSG00000017286_Glod4	42.13	39.4	51.85	42.13	28.57	36.31	33.05	33.05
ENSMUSG00000017288_Vps53	39.02	26.58	26.88	26.88	41.04	31.55	40.85	40.85
ENSMUSG00000017291_Taok1	52.58	51.64	48.8	51.64	49.15	38.4	44.48	44.48
ENSMUSG00000017299_Dnttip1	12.89	8.88	3.53	8.88	6.82	11.27	15.86	11.27
ENSMUSG00000017300_Tnnc2	1.01	1.97	0	1.01	0	0	0	0
ENSMUSG00000017307_Acot8	3.86	4.76	3.37	3.86	11.01	10.79	10.93	10.93
ENSMUSG00000017309_Cd300lg	0.39	1.59	1.53	1.53	5.24	6.44	2.7	5.24
ENSMUSG00000017310_Spint4	0	0	0	0	1.43	0	0	0
ENSMUSG00000017311_Pyy	0	3.01	0	0	0	12.77	7.86	7.86
ENSMUSG00000017314_Mpp2	3.86	3.01	5.49	3.86	3.95	7.62	15.84	7.62
ENSMUSG00000017316_Ppy	0	0	0	0	0	0	0	0
ENSMUSG00000017344_Vtn	11.13	4.21	10.36	10.36	8.77	34.59	8.05	8.77
ENSMUSG00000017376_Nlk	31.33	37.62	17.82	31.33	34.71	21.41	24.94	24.94
ENSMUSG00000017386_Traf4	7.85	6.57	9.68	7.85	8.63	11.04	12.08	11.04
ENSMUSG00000017390_Aldoc	1742.64	1257.95	1159.87	1257.95	1042.23	1126.37	970.29	1042.23
ENSMUSG00000017400_Stac2	6.42	3.59	8.51	6.42	2.27	6.74	8.17	6.74
ENSMUSG00000017404_Rpl19	314.03	210.89	197.55	210.89	189.51	221.18	192.4	192.4
ENSMUSG00000017405_Nek8	1.51	6.37	3.73	3.73	1.37	2.7	16.07	2.7
ENSMUSG00000017412_Cacnb4	434.31	498.25	349.01	434.31	398.27	242.81	80.14	242.81
ENSMUSG00000017417_Plxdc1	44.3	32.39	25.16	32.39	31.74	44.75	26.2	31.74
ENSMUSG00000017418_Arl5b	7.89	6.34	9.5	7.89	8.23	20.54	16.84	16.84
ENSMUSG00000017421_Zfp207	88.58	94.67	77.38	88.58	92.53	48.57	63.3	63.3
ENSMUSG00000017428_Psmd11	41.6	32.79	29.34	32.79	37.76	27.23	38.02	37.76
ENSMUSG00000017446_C1qtnf1	0	0.42	0	0	1.39	16.92	15.93	15.93
ENSMUSG00000017453_Pipox	2.55	1.92	3.12	2.55	2.68	4.33	9.08	4.33
ENSMUSG00000017466_Timp2	6.84	3.56	2.87	3.56	3.22	9.74	8.72	8.72
ENSMUSG00000017478_Zc3h18	23.78	14.58	10.94	14.58	24.36	46.55	42.97	42.97
ENSMUSG00000017485_Top2b	74.27	85.97	105.24	85.97	86.05	57.16	74.71	74.71
ENSMUSG00000017491_Rarb	5.08	5.34	4.42	5.08	3.42	2.64	5.14	3.42
ENSMUSG00000017493_Igfbp4	5.38	5.03	3.18	5.03	1.78	4.71	6.42	4.71
ENSMUSG00000017499_Cdc6	0	1.55	0.5	0.5	1.83	7.19	3.3	3.3
ENSMUSG00000017548_Suz12	18.87	23.99	20.71	20.71	22.37	13.89	20.23	20.23
ENSMUSG00000017550_Atad5	3.93	2.97	2.87	2.97	3.9	3.63	3.51	3.63
ENSMUSG00000017561_Crlf3	23.51	13.14	14.23	14.23	13.49	19.38	19.74	19.38
ENSMUSG00000017588_Krt27	0.18	0.36	0	0.18	1.78	3.95	2.15	2.15
ENSMUSG00000017607_Tns4	0.56	0.43	0.08	0.43	8.83	6.77	10.65	8.83
ENSMUSG00000017615_Tnfaip1	6.35	8.11	4.34	6.35	5.74	8.16	10.76	8.16
ENSMUSG00000017631_Abr	160.46	89.04	77.98	89.04	78.3	90.48	88.76	88.76
ENSMUSG00000017639_Rab11fip4	100.99	57.12	61.15	61.15	48.17	69.6	67.51	67.51
ENSMUSG00000017652_Cd40	0.17	0.53	0	0.17	7.19	8.41	5.23	7.19
ENSMUSG00000017664_Slc35c2	12.69	12.84	14.43	12.84	18.6	24.76	39.35	24.76
ENSMUSG00000017667_Zfp334	4.04	4.38	4.09	4.09	4.55	6.68	8.2	6.68
ENSMUSG00000017670_Elmo2	70.69	66.14	69.11	69.11	64.35	36.44	55.77	55.77
ENSMUSG00000017677_Wsb1	33.19	27.99	41.32	33.19	31.65	28.52	35.82	31.65
ENSMUSG00000017679_Ttpal	14.89	10.6	11.68	11.68	11.8	10.72	32.5	11.8
ENSMUSG00000017686_Rhot1	31.24	29.75	32.49	31.24	22.31	23.16	24.21	23.16
ENSMUSG00000017688_Hnf4g	0.12	0	0	0	2.39	1.05	0.72	1.05
ENSMUSG00000017692_Rhbdl3	2.84	4.91	1.22	2.84	10.86	9.13	21.65	10.86
ENSMUSG00000017697_Ada	0	0.33	0.5	0.33	2.75	0	13.2	2.75
ENSMUSG00000017707_Serinc3	33	42.69	42.54	42.54	33.26	18.09	26.17	26.17
ENSMUSG00000017713_Tha1	0.56	1.77	0.3	0.56	2.59	7.3	4.68	4.68
ENSMUSG00000017715_Pgs1	5.91	5.92	9.33	5.92	6.67	10.8	8.65	8.65
ENSMUSG00000017716_Birc5	0.15	0.78	1.41	0.78	3.86	4.43	5.11	4.43
ENSMUSG00000017718_Afmid	0	1.07	0	0	4.44	5.44	4.23	4.44
ENSMUSG00000017720_Trp53tg5	0	0	0	0	5.4	5.78	1.97	5.4
ENSMUSG00000017721_Pigt	44.09	25.85	33.57	33.57	33.77	37.03	26.87	33.77
ENSMUSG00000017723_Wfdc2	0	0	0	0	0	0	0	0
ENSMUSG00000017724_Etv4	25.67	8.23	14.44	14.44	7.53	25.19	14.62	14.62
ENSMUSG00000017733_Eppin	0	0	0	0	0	0	0	0
ENSMUSG00000017734_Dbndd2	79.71	56.85	46.2	56.85	50.53	68.72	42.84	50.53
ENSMUSG00000017737_Mmp9	1.05	1.89	7.17	1.89	3.45	6.89	9.39	6.89
ENSMUSG00000017740_Slc12a5	348.34	264.96	271.12	271.12	282.92	333.16	417.66	333.16
ENSMUSG00000017747_Ghdc	6.92	4.79	2.94	4.79	7.29	18.31	7.08	7.29
ENSMUSG00000017754_Pltp	39.78	24.19	23.29	24.19	22.5	20.52	15.31	20.52
ENSMUSG00000017756_Slc12a7	0.14	0.4	0.15	0.15	1.31	2.6	4.73	2.6
ENSMUSG00000017760_Ctsa	19.49	25.24	16.36	19.49	21.58	44.53	15.54	21.58
ENSMUSG00000017764_Zswim1	4.54	4.87	7.27	4.87	4.18	14.54	7.44	7.44
ENSMUSG00000017765_Slc12a4	22.86	29.77	11.68	22.86	15.41	25.94	11.97	15.41
ENSMUSG00000017767_Spata25	0	0	0	0	2.69	3.62	8.37	3.62
ENSMUSG00000017774_Myo1c	4.9	2.44	3.35	3.35	4.48	11.44	6.62	6.62
ENSMUSG00000017776_Crk	37.35	32.83	28.31	32.83	51.52	40.22	30.72	40.22
ENSMUSG00000017778_Cox7c	251.82	313.86	174.71	251.82	187.51	189.45	161.88	187.51
ENSMUSG00000017781_Pitpna	104.91	75.97	81.54	81.54	82.6	90.07	90.39	90.07
ENSMUSG00000017801_Mlx	20.53	16.17	15.85	16.17	19.69	6.8	15.01	15.01
ENSMUSG00000017802_Fam134c	22.81	10.38	13.18	13.18	8.71	14.18	11.3	11.3
ENSMUSG00000017817_Jph2	0.23	0.25	0	0.23	0.41	1.86	2.21	1.86
ENSMUSG00000017830_Dhx58	1.16	2.7	4.34	2.7	3.12	11.93	15.42	11.93
ENSMUSG00000017831_Rab5a	68.12	50.36	44.37	50.36	47.33	79.63	62.7	62.7
ENSMUSG00000017832_Hspb9	0	0	0	0	0	2.34	0	0
ENSMUSG00000017837_Nkiras2	17.4	7.45	18.42	17.4	19.11	24.81	26.87	24.81
ENSMUSG00000017843_Ppp2r5c	20.47	20.24	17.25	20.24	16.96	11.76	13.05	13.05
ENSMUSG00000017858_Ift52	13.17	14.74	11.8	13.17	23.36	21.94	16.18	21.94
ENSMUSG00000017861_Mybl2	1.32	2.59	0.21	1.32	5.78	4.95	10.02	5.78
ENSMUSG00000017868_Sgk2	0	1.03	0	0	4.89	3.01	0.58	3.01
ENSMUSG00000017897_Eya2	0.64	1.3	0.98	0.98	6.12	2.83	8.81	6.12
ENSMUSG00000017922_Prl3c1	0	0	0	0	0	0	0	0
ENSMUSG00000017929_B4galt5	38.04	31.58	30.12	31.58	9.66	27.34	55.52	27.34
ENSMUSG00000017943_Gdap1l1	19.77	16.16	13.78	16.16	15.58	21.58	15.35	15.58
ENSMUSG00000017950_Hnf4a	0.06	1.88	0	0.06	1.75	4.37	3.51	3.51
ENSMUSG00000017969_Ptgis	0.12	0.26	0.58	0.26	0	2.44	3.81	2.44
ENSMUSG00000017978_Cadps2	49.29	43.58	49.66	49.29	48.94	29.95	46.2	46.2
ENSMUSG00000017999_Ddx27	26.76	22.92	17.2	22.92	27.54	29.08	26.83	27.54
ENSMUSG00000018001_Cyth3	68.77	53.82	49.28	53.82	74.81	50.07	43.83	50.07
ENSMUSG00000018008_Cyth4	0.45	1.51	0.57	0.57	0.62	2.88	1.12	1.12
ENSMUSG00000018012_Rac3	9.26	2.8	3.81	3.81	9.54	8.49	7.35	8.49
ENSMUSG00000018040_Rrp7a	10.05	6.08	20.21	10.05	17.49	31.47	12.07	17.49
ENSMUSG00000018042_Cyb5r3	19.51	16.99	15.77	16.99	17.7	37.6	40.97	37.6
ENSMUSG00000018068_Ints2	6.95	9.26	6.33	6.95	13.03	12.03	10.43	12.03
ENSMUSG00000018076_Med13l	10.61	17.86	9.43	10.61	14.25	39.42	25.73	25.73
ENSMUSG00000018102_Hist1h2bc	79.64	70.35	54.65	70.35	70.88	87.47	40.43	70.88
ENSMUSG00000018126_Baiap2l2	0	0	0	0	0.42	4.17	1.69	1.69
ENSMUSG00000018143_Mafk	2.6	2.37	0.14	2.37	2.79	6.83	12.21	6.83
ENSMUSG00000018160_Med1	14.42	13.24	24.4	14.42	26.53	36.61	22.78	26.53
ENSMUSG00000018166_Erbb3	0.28	0.67	0.06	0.28	0.97	1.84	1.5	1.5
ENSMUSG00000018167_Stard3	4.24	9.3	4.54	4.54	3.5	18.78	7.57	7.57
ENSMUSG00000018168_Ikzf3	0.51	3.31	4.17	3.31	5.76	14.71	21.21	14.71
ENSMUSG00000018169_Mfng	0	0.59	1.47	0.59	3.45	4.14	7.36	4.14
ENSMUSG00000018171_Vmp1	85.96	74.28	179.24	85.96	120.37	102.93	89.31	102.93
ENSMUSG00000018189_Uchl5	44.52	44.68	33.26	44.52	48.64	57.01	45.8	48.64
ENSMUSG00000018196_Glrx2	91.16	42.67	57.8	57.8	37.41	58.89	46.73	46.73
ENSMUSG00000018199_Trove2	30.92	31.9	24.75	30.92	38.08	22.15	25.94	25.94
ENSMUSG00000018209_Stk4	21.1	15.01	25.36	21.1	17.07	38.14	27.81	27.81
ENSMUSG00000018211_Wfdc15b	0	0	0	0	0	0	0	0
ENSMUSG00000018217_Pmp22	12.89	19.38	8.54	12.89	11.68	13.46	16.46	13.46
ENSMUSG00000018238_Gdf9	1.33	6.49	0.23	1.33	4.35	26.53	40.78	26.53
ENSMUSG00000018239_Zcchc10	7.61	13.3	4.51	7.61	8.99	4.99	12.22	8.99
ENSMUSG00000018259_Prl8a2	0	0	0	0	0	0	0	0
ENSMUSG00000018263_Tbx5	0.12	2.46	0.2	0.2	3.8	7.33	11.19	7.33
ENSMUSG00000018286_Psmb6	61.08	65.54	85.13	65.54	67.18	73.17	57.57	67.18
ENSMUSG00000018287_Spag7	97.02	107.37	77.21	97.02	73	85.7	69.45	73
ENSMUSG00000018293_Pfn1	90.67	43.9	57.68	57.68	38.48	39.39	45.71	39.39
ENSMUSG00000018322_Tomm34	16.86	14.78	14.08	14.78	7.89	10.53	10	10
ENSMUSG00000018326_Ywhab	105.24	88.15	80.19	88.15	118.95	119.6	44.99	118.95
ENSMUSG00000018334_Ksr1	10.27	3.32	4.42	4.42	5.02	19.04	30.36	19.04
ENSMUSG00000018339_Gpx3	0.85	0.95	0	0.85	2.88	6.09	3.12	3.12
ENSMUSG00000018340_Anxa6	41.94	37.6	30.89	37.6	29.35	25.81	22.25	25.81
ENSMUSG00000018341_Il12rb2	0	0.35	0	0	1.16	2.23	0.6	1.16
ENSMUSG00000018347_Zkscan6	2.71	3.07	2.5	2.71	3.5	4.64	5.62	4.64
ENSMUSG00000018362_Kpna2	10.13	10.57	9.23	10.13	4.51	6.89	17.51	6.89
ENSMUSG00000018363_Smurf2	10.46	9.24	11.33	10.46	8.21	3.95	19.28	8.21
ENSMUSG00000018372_Cep95	11.85	11.48	12.32	11.85	52.51	30.22	43.1	43.1
ENSMUSG00000018377_Vezf1	19.05	15.3	13.69	15.3	16.87	15.22	15.69	15.69
ENSMUSG00000018378_Cuedc1	7.81	8.02	10.7	8.02	14.35	8.6	16.5	14.35
ENSMUSG00000018379_Srsf1	123.14	95.08	112.12	112.12	134.6	74.12	97.92	97.92
ENSMUSG00000018381_Abi3	0	4.41	0.88	0.88	0.99	30.95	14.84	14.84
ENSMUSG00000018387_Shroom1	0.77	0.9	0.42	0.77	1.86	2.7	3.35	2.7
ENSMUSG00000018395_Kif3a	140.55	119.61	99.3	119.61	116.73	170.4	159.93	159.93
ENSMUSG00000018398_Sept8	170.86	137.6	115.91	137.6	115.62	137.59	200.43	137.59
ENSMUSG00000018401_Mtmr4	22.7	15.19	19.36	19.36	19.3	21.56	16.02	19.3
ENSMUSG00000018405_Mrm1	2.66	5.06	8.8	5.06	6.46	3.75	0.64	3.75
ENSMUSG00000018411_Mapt	126.3	112.23	125.2	125.2	138.7	122.5	119.54	122.5
ENSMUSG00000018412_Kansl1	20.05	18.81	20.18	20.05	19.95	13.83	17.3	17.3
ENSMUSG00000018415_Gid4	10	8.77	7.13	8.77	9.31	9.16	13.25	9.31
ENSMUSG00000018417_Myo1b	15.1	13.81	23.87	15.1	15.37	23.91	28.26	23.91
ENSMUSG00000018425_Dhx40	9.92	14.32	9.59	9.92	18.8	15.37	10.89	15.37
ENSMUSG00000018427_Ypel2	3.97	4.2	4.52	4.2	6.09	6.21	5.65	6.09
ENSMUSG00000018428_Akap1	11.77	13.41	15.33	13.41	15.94	21.53	28.06	21.53
ENSMUSG00000018433_Nol11	17.66	15.01	25.78	17.66	16.75	17.46	8.46	16.75
ENSMUSG00000018442_Derl2	10.53	10.27	12.96	10.53	14.16	32.41	26.15	26.15
ENSMUSG00000018446_C1qbp	34.96	28.42	11.59	28.42	23.39	25.87	27.8	25.87
ENSMUSG00000018449_Rpain	10.32	6.7	7.95	7.95	15.01	11.19	5.49	11.19
ENSMUSG00000018451_6330403K07Rik	5.86	4.53	12.28	5.86	6.81	9.05	6.73	6.81
ENSMUSG00000018459_Slc13a3	5.68	11.62	2.89	5.68	8.12	31.97	6.06	8.12
ENSMUSG00000018470_Kcnab3	20.91	10.65	16.09	16.09	6.89	19.17	18.67	18.67
ENSMUSG00000018474_Chd3	41.91	24.88	31.1	31.1	38.05	63.26	44.71	44.71
ENSMUSG00000018476_Kdm6b	12.33	4.76	14.58	12.33	11.48	9.94	12.82	11.48
ENSMUSG00000018479_1700125H20Rik	0	0	0	0	0	2.17	5.9	2.17
ENSMUSG00000018481_Appbp2	17.25	17.98	20.81	17.98	19.13	16.29	14.4	16.29
ENSMUSG00000018486_Wnt9b	0.85	1.58	0.26	0.85	2.25	6.68	6.75	6.68
ENSMUSG00000018500_Adora2b	0.57	0.89	2.24	0.89	0.98	3.24	7.07	3.24
ENSMUSG00000018501_Ncor1	200.31	158.32	239.16	200.31	153.73	170.2	233.66	170.2
ENSMUSG00000018507_Trpv2	3.68	2.82	0.89	2.82	2.56	19.47	25.77	19.47
ENSMUSG00000018509_Cenpv	5.89	2.94	8.46	5.89	6.75	11.13	5.29	6.75
ENSMUSG00000018537_Pcgf2	9.55	7.66	3.44	7.66	17.21	15.71	6.78	15.71
ENSMUSG00000018541_Cwc25	9.37	5.71	7.96	7.96	8.38	13.44	16.91	13.44
ENSMUSG00000018543_1700001P01Rik	0	0	0	0	1.84	0	0	0
ENSMUSG00000018547_Pip4k2b	14.84	15.1	11.84	14.84	22.44	24.08	22.98	22.98
ENSMUSG00000018548_Trim37	89.5	85.56	91.77	89.5	92.95	92.43	87.24	92.43
ENSMUSG00000018554_Ybx2	4.64	2.27	0	2.27	1.64	12.45	19.63	12.45
ENSMUSG00000018559_Ctdnep1	10.46	7.64	6.67	7.64	10.26	10.22	10.25	10.25
ENSMUSG00000018565_Elp5	18.68	34.77	47.11	34.77	25.74	51.8	54.81	51.8
ENSMUSG00000018566_Slc2a4	1.5	6.82	9.19	6.82	0.81	18.11	5.35	5.35
ENSMUSG00000018567_Gabarap	49.24	43	66.49	49.24	50.09	37.28	30.27	37.28
ENSMUSG00000018569_Cldn7	0.39	0	0	0	6.19	8.52	3.83	6.19
ENSMUSG00000018570_2810408A11Rik	0.74	2.09	0	0.74	0.4	4.29	6.25	4.29
ENSMUSG00000018572_Phf23	22.13	21.82	30.17	22.13	25.82	56.34	21.6	25.82
ENSMUSG00000018574_Acadvl	27.13	13.16	19.21	19.21	17.93	24.92	43.73	24.92
ENSMUSG00000018581_Dnah11	3.91	2.18	4.25	3.91	3.48	7.81	8.06	7.81
ENSMUSG00000018583_G3bp1	11.43	17.85	13.29	13.29	11.48	10.08	10.84	10.84
ENSMUSG00000018585_Atox1	47.21	32.89	73.02	47.21	9.06	39.39	12.54	12.54
ENSMUSG00000018589_Glra2	0.63	0.17	0.25	0.25	0.55	1.09	0	0.55
ENSMUSG00000018593_Sparc	195.4	140.58	177.57	177.57	170.27	146.23	136.42	146.23
ENSMUSG00000018595_Glra4	0.35	0.36	0	0.35	2.98	3.95	3.23	3.23
ENSMUSG00000018599_Mief2	2.81	3.78	8.48	3.78	4.16	6.19	5.01	5.01
ENSMUSG00000018604_Tbx3	0.77	2.94	0.77	0.77	2.06	8.25	3.96	3.96
ENSMUSG00000018620_Mmp20	0.3	0.63	0.36	0.36	0.79	0.69	2.37	0.79
ENSMUSG00000018623_Mmp7	0	0	0	0	0	3.67	0	0
ENSMUSG00000018634_Crhr1	5.88	5.83	11.91	5.88	4.28	3.31	7.73	4.28
ENSMUSG00000018648_Dusp14	7.24	3.92	4.67	4.67	10.27	12.08	10.76	10.76
ENSMUSG00000018651_Tada2a	11.72	7.36	17.5	11.72	9.9	8.2	15.7	9.9
ENSMUSG00000018654_Ikzf1	0.14	0.98	0.49	0.49	2.12	2.79	6.38	2.79
ENSMUSG00000018656_Tcaf3	0	1.32	1.95	1.32	1.11	4.89	8.31	4.89
ENSMUSG00000018659_Pnpo	14.56	10.28	10.06	10.28	12.93	27.67	14.22	14.22
ENSMUSG00000018661_Cog1	19.84	18.34	27.8	19.84	16.18	10.05	22.15	16.18
ENSMUSG00000018666_Cbx1	73.96	44.79	41.44	44.79	50.21	89.3	70.28	70.28
ENSMUSG00000018669_Cdk5rap3	14.21	13.29	7.02	13.29	10.1	17.07	16.27	16.27
ENSMUSG00000018672_Copz2	6.88	7.55	0	6.88	7.69	15.34	7.24	7.69
ENSMUSG00000018677_Slc25a39	20.08	15.32	13.93	15.32	11.96	16.19	13.69	13.69
ENSMUSG00000018678_Sp2	3.77	4.13	5.79	4.13	5.98	10.55	8.71	8.71
ENSMUSG00000018697_Aatf	72.4	48.31	39.66	48.31	50.27	87.23	87.57	87.23
ENSMUSG00000018698_Lhx1	23.9	19.28	16.27	19.28	17.71	17.87	26.72	17.87
ENSMUSG00000018707_Dync1h1	83.98	61.28	69.14	69.14	66.51	55.62	46.98	55.62
ENSMUSG00000018727_Cpsf4l	5.47	4.61	3.21	4.61	5.4	11.99	15.78	11.99
ENSMUSG00000018733_Pex12	2.88	5.41	5.52	5.41	7.15	17.96	11.57	11.57
ENSMUSG00000018736_Ndel1	54.03	60.95	55.66	55.66	72.56	43.79	75.83	72.56
ENSMUSG00000018740_Slc25a35	4.09	4.2	2.95	4.09	4.4	17.05	12.5	12.5
ENSMUSG00000018750_Zbtb4	29.17	18.18	20.21	20.21	22.53	45.22	75.89	45.22
ENSMUSG00000018752_Tnfsfm13	0	1.2	1.04	1.04	0.68	1.16	1.59	1.16
ENSMUSG00000018761_Mpdu1	10.58	13.3	13.96	13.3	15.93	21.61	26.24	21.61
ENSMUSG00000018765_Fxr2	53.99	52.06	44.35	52.06	38.41	67.75	48.73	48.73
ENSMUSG00000018770_Atp5g3	118.86	105.52	133.32	118.86	119.82	82.9	53.05	82.9
ENSMUSG00000018774_Cd68	0.7	3.5	3.67	3.5	1.97	2.63	2.81	2.63
ENSMUSG00000018776_Slc35g3	0.67	1.38	0	0.67	7.92	12.77	5.12	7.92
ENSMUSG00000018796_Acsl1	6.18	13.2	10.85	10.85	10.69	13.14	11.22	11.22
ENSMUSG00000018800_Abca5	13.51	14.01	18.25	14.01	18.28	15.08	20.44	18.28
[truncated: 45,644 more rows]

## Sheet: up_pathway_top20
p-value	log(pval)	T	Q	Q&T	Q&T/Q	Q&T/T	term ID	t type	t name
1.39e-47	46.857	4459	1421	526	0.37	0.118	GO:0051234	BP	establishment of localization
5.81e-47	46.2358	2314	1421	339	0.239	0.146	GO:0051641	BP	cellular localization
1.14e-46	45.9431	5603	1421	613	0.431	0.109	GO:0051179	BP	localization
1.9e-45	44.7212	5673	1421	615	0.433	0.108	GO:0071840	BP	cellular component organization or biogenesis
2.42e-44	43.6162	5515	1421	600	0.422	0.109	GO:0016043	BP	cellular component organization
5e-42	41.301	15975	1421	1250	0.88	0.078	GO:0009987	BP	cellular process
3.57e-39	38.4473	2123	1421	304	0.214	0.143	GO:0007399	BP	nervous system development
1.24e-38	37.9066	3202	1421	399	0.281	0.125	GO:0065008	BP	regulation of biological quality
1.05e-36	35.9788	2314	1421	316	0.222	0.137	GO:0008104	BP	protein localization
4.22e-36	35.3747	1816	1421	268	0.189	0.148	GO:0051649	BP	establishment of localization in cell
6.37e-35	34.1959	6357	1421	635	0.447	0.1	GO:1901564	BP	organonitrogen compound metabolic process
7.47e-34	33.1267	1528	1421	235	0.165	0.154	GO:0046907	BP	intracellular transport
1.96e-33	32.7077	2616	1421	335	0.236	0.128	GO:0033036	BP	macromolecule localization
7.26e-29	28.1391	9889	1421	857	0.603	0.087	GO:0044237	BP	cellular metabolic process
7.58e-29	28.1203	1497	1421	221	0.156	0.148	GO:0034613	BP	cellular protein localization
2.25e-28	27.6478	1508	1421	221	0.156	0.147	GO:0070727	BP	cellular macromolecule localization
1.17e-27	26.9318	3384	1421	384	0.27	0.113	GO:0006996	BP	organelle organization
1.53e-27	26.8153	4666	1421	485	0.341	0.104	GO:0044267	BP	cellular protein metabolic process
7.31e-26	25.1361	532	1421	112	0.079	0.211	GO:0099536	BP	synaptic signaling
7.31e-26	25.1361	532	1421	112	0.079	0.211	GO:0099537	BP	trans-synaptic signaling

## Sheet: up_filtered_top10
p-value	log(pval)	T	Q	Q&T	Q&T/Q	Q&T/T	term ID	t type	t name
7.31e-26	25.1361	532	1421	112	0.079	0.211	GO:0099536	BP	synaptic signaling
7.31e-26	25.1361	532	1421	112	0.079	0.211	GO:0099537	BP	trans-synaptic signaling
2.12e-25	24.6737	530	1421	111	0.078	0.209	GO:0098916	BP	anterograde trans-synaptic signaling
2.12e-25	24.6737	530	1421	111	0.078	0.209	GO:0007268	BP	chemical synaptic transmission
1.76e-20	19.7545	474	1421	96	0.068	0.203	GO:0051640	BP	organelle localization
4.34e-20	19.3625	328	1421	77	0.054	0.235	GO:0006091	BP	generation of precursor metabolites and energy
2.35e-18	17.6289	196	1421	56	0.039	0.286	GO:0051648	BP	vesicle localization
3.28e-18	17.4841	304	1421	71	0.05	0.234	GO:0050804	BP	modulation of chemical synaptic transmission
2.32e-17	16.6345	123	1421	43	0.03	0.35	GO:0097479	BP	synaptic vesicle localization
8.73e-17	16.059	210	1421	56	0.039	0.267	GO:0046034	BP	ATP metabolic process

## Sheet: down_pathway_top20
p-value	log(pval)	T	Q	Q&T	Q&T/Q	Q&T/T	term ID	t type	t name
5.16e-12	11.2874	2298	1764	289	0.164	0.126	GO:0007186	BP	G-protein coupled receptor signaling pathway
1.5e-11	10.8239	2781	1764	334	0.189	0.12	GO:0003008	BP	system process
6.59e-10	9.18111	7756	1764	767	0.435	0.099	GO:0032501	BP	multicellular organismal process
6.22e-09	8.20621	1828	1764	230	0.13	0.126	GO:0007600	BP	sensory perception
1.84e-07	6.73518	6701	1764	662	0.375	0.099	GO:0023052	BP	signaling
4.84e-07	6.31515	6758	1764	664	0.376	0.098	GO:0007154	BP	cell communication
7.47e-07	6.12668	2180	1764	255	0.145	0.117	GO:0050877	BP	nervous system process
1.4e-06	5.85387	6279	1764	620	0.351	0.099	GO:0007165	BP	signal transduction
2.97e-06	5.52724	588	1764	91	0.052	0.155	GO:0006954	BP	inflammatory response
5.26e-06	5.27901	4924	1764	499	0.283	0.101	GO:0042221	BP	response to chemical
1.58e-05	4.80134	1338	1764	167	0.095	0.125	GO:0051606	BP	detection of stimulus
4.35e-05	4.36151	7570	1764	718	0.407	0.095	GO:0051716	BP	cellular response to stimulus
5.27e-05	4.27819	9076	1764	842	0.477	0.093	GO:0050896	BP	response to stimulus
6.62e-05	4.17914	938	1764	124	0.07	0.132	GO:0009887	BP	animal organ morphogenesis
0.000145	3.83863	140	1764	32	0.018	0.229	GO:0050953	BP	sensory perception of light stimulus
0.000154	3.81248	412	1764	66	0.037	0.16	GO:0019221	BP	cytokine-mediated signaling pathway
0.000229	3.64016	487	1764	74	0.042	0.152	GO:0031347	BP	regulation of defense response
0.000369	3.43297	3244	1764	338	0.192	0.104	GO:0048513	BP	animal organ development
0.00066	3.18046	1249	1764	151	0.086	0.121	GO:0050906	BP	detection of stimulus involved in sensory perception
0.000665	3.17718	724	1764	98	0.056	0.135	GO:0071345	BP	cellular response to cytokine stimulus

## Sheet: pathway_graph
log(pval)	t name		log(pval)	t name
25.1361	synaptic signaling		11.2874	G-protein coupled receptor signaling pathway
25.1361	trans-synaptic signaling		10.8239	system process
24.6737	anterograde trans-synaptic signaling		9.18111	multicellular organismal process
24.6737	chemical synaptic transmission		8.20621	sensory perception
19.7545	organelle localization		6.73518	signaling
19.3625	generation of precursor metabolites and energy		6.31515	cell communication
17.6289	vesicle localization		6.12668	nervous system process
17.4841	modulation of chemical synaptic transmission		5.85387	signal transduction
16.6345	synaptic vesicle localization		5.52724	inflammatory response
16.059	ATP metabolic process		5.27901	response to chemical

## Sheet: synaptic_signaling_heatmap
bin	group	NAME	symbol	KO2.ssv2	KO1.ssv2	KO3.ssv2	WT1.ssv2	WT2.ssv2	WT3.ssv2
1	KOup	ENSMUSG00000020932	Gfap	0.029209	0.028392	0.005438	-0.0637	0.038375	-0.046117
2	KOup	ENSMUSG00000028964	Park7	0.043529	0.017779	0.024846	-0.050689	0.025088	-0.057129
3	KOup	ENSMUSG00000019969	Psen1	0.01775	0.036756	0.011319	-0.003047	0.013999	-0.071153
4	KOup	ENSMUSG00000046191	Pcdhb20	0.030414	0.038448	-0.006543	-0.020944	0.026856	-0.064721
5	KOup	ENSMUSG00000015668	Pdzd11	0.067291	0.031005	0.013267	-0.031638	-0.004704	-0.057398
6	KOup	ENSMUSG00000021071	Trim9	0.051429	0.036867	0.019978	-0.015456	-0.018489	-0.057325
7	KOup	ENSMUSG00000022789	Dnm1l	0.039098	0.049762	0.009335	-0.011356	-0.024303	-0.050384
8	KOup	ENSMUSG00000027562	Car2	0.068473	0.040131	0.003167	-0.011052	-0.027634	-0.049318
9	KOup	ENSMUSG00000013089	Etv5	0.05838	0.044092	0.011942	-0.050346	-0.023897	-0.031334
10	KOup	ENSMUSG00000024268	Celf4	0.051162	0.035613	0.027818	-0.03267	-0.047521	-0.021024
11	KOup	ENSMUSG00000020122	Egfr	0.058439	0.044335	0.007879	-0.026739	-0.046838	-0.021073
12	KOup	ENSMUSG00000022494	Shisa9	0.058539	0.041105	0.014883	-0.041359	-0.043072	-0.017715
13	KOup	ENSMUSG00000031302	Nlgn3	0.049717	0.050826	0.004664	-0.042708	-0.036958	-0.018398
14	KOup	ENSMUSG00000006024	Napa	0.038197	0.053721	0.009168	-0.027477	-0.031738	-0.034709
15	KOup	ENSMUSG00000038910	Plcl2	0.032205	0.051071	0.016577	-0.027729	-0.043028	-0.023367
16	KOup	ENSMUSG00000006476	Nsmf	0.039094	0.021147	0.049011	-0.058612	-0.014009	-0.034257
17	KOup	ENSMUSG00000026385	Dbi	0.052216	0.035588	0.028705	-0.053444	-0.020659	-0.035314
18	KOup	ENSMUSG00000029053	Prkcz	0.046761	0.029722	0.038879	-0.051309	-0.020375	-0.037087
19	KOup	ENSMUSG00000028969	Cdk5	0.052706	0.024623	0.034486	-0.066937	-0.004717	-0.036406
20	KOup	ENSMUSG00000028756	Pink1	0.028854	0.032935	0.044539	-0.042854	-0.022342	-0.038752
21	KOup	ENSMUSG00000030806	Stx1b	0.027611	0.034256	0.043968	-0.045486	-0.034962	-0.024015
22	KOup	ENSMUSG00000029071	Dvl1	0.043739	0.034143	0.034871	-0.029937	-0.025011	-0.04654
23	KOup	ENSMUSG00000031980	Agt	0.032792	0.039494	0.031955	-0.033829	-0.015915	-0.049375
24	KOup	ENSMUSG00000025551	Fgf14	0.076698	0.016489	0.033464	-0.026041	-0.032696	-0.041791
25	KOup	ENSMUSG00000022523	Fgf12	0.078276	0.021629	0.024616	-0.020377	-0.047964	-0.028282
26	KOup	ENSMUSG00000025958	Creb1	0.079495	0.024451	0.021037	-0.032458	-0.04692	-0.021164
27	KOup	ENSMUSG00000049044	Rapgef4	0.07555	0.014928	0.035172	-0.040021	-0.043127	-0.020433
28	KOup	ENSMUSG00000062232	Rapgef2	0.064799	-0.000841	0.046871	-0.002671	-0.053203	-0.024516
29	KOup	ENSMUSG00000036104	Rab3gap1	0.077065	0.00879	0.031559	-0.068935	-0.001836	-0.033636
30	KOup	ENSMUSG00000019899	Lama2	0.033855	0.044734	-0.004872	0.03215	-0.057169	-0.026125
31	KOup	ENSMUSG00000025372	Baiap2	0.003754	0.051905	0.004326	0.030308	-0.052022	-0.027764
32	KOup	ENSMUSG00000027296	Itpka	0.022521	0.048117	-0.004459	0.038269	-0.035994	-0.049242
33	KOup	ENSMUSG00000020308	Tpgs1	0.008726	0.037559	0.023793	0.034182	-0.032462	-0.056611
34	KOup	ENSMUSG00000034275	Igsf9b	0.021988	0.040242	0.012468	0.036011	-0.036453	-0.054211
35	KOup	ENSMUSG00000028613	Lrp8	0.012617	0.041538	0.021874	0.028199	-0.047091	-0.042037
36	KOup	ENSMUSG00000026452	Syt2	0.009979	0.043798	0.024232	0.00885	-0.058704	-0.019294
37	KOup	ENSMUSG00000017765	Slc12a4	0.062291	0.038277	0.008496	0.000468	-0.048833	-0.034944
38	KOup	ENSMUSG00000030265	Kras	0.045572	0.045075	0.012475	-0.003505	-0.046554	-0.035037
39	KOup	ENSMUSG00000001260	Gabrg1	0.067239	0.023261	0.027469	-0.008257	-0.052546	-0.029802
40	KOup	ENSMUSG00000020716	Nf1	0.055311	0.021993	0.036126	-0.002734	-0.04943	-0.036337
41	KOup	ENSMUSG00000005360	Slc1a3	0.040291	0.04028	0.025476	-0.007198	-0.042088	-0.04077
42	KOup	ENSMUSG00000028657	Ppt1	0.053059	0.035113	0.025445	-0.010757	-0.043958	-0.03867
43	KOup	ENSMUSG00000037996	Slc24a2	0.050438	0.032008	0.033987	-0.022604	-0.038447	-0.038967
44	KOup	ENSMUSG00000024109	Nrxn1	0.044569	0.02926	0.03331	0.002804	-0.043146	-0.045156
45	KOup	ENSMUSG00000034593	Myo5a	0.040277	0.028002	0.038362	-0.000887	-0.041388	-0.045081
46	KOup	ENSMUSG00000019906	Lin7a	0.06207	0.006415	0.050555	-0.023747	-0.03822	-0.034172
47	KOup	ENSMUSG00000017686	Rhot1	0.04279	0.023268	0.046166	-0.023329	-0.046092	-0.02812
48	KOup	ENSMUSG00000025920	Stau2	0.049708	0.014028	0.051375	-0.022815	-0.039468	-0.034695
49	KOup	ENSMUSG00000030774	Pak1	0.040012	0.016322	0.053462	-0.018373	-0.04024	-0.035478
50	KOup	ENSMUSG00000042453	Reln	0.031596	0.018698	0.055868	-0.022728	-0.037547	-0.034734
51	KOup	ENSMUSG00000035864	Syt1	0.042778	0.025226	0.044267	-0.017466	-0.036363	-0.04254
52	KOup	ENSMUSG00000026825	Dnm1	0.020477	0.040791	0.036944	-0.018655	-0.045169	-0.028558
53	KOup	ENSMUSG00000026024	Als2	0.037586	0.032347	0.040564	-0.024646	-0.042086	-0.032399
54	KOup	ENSMUSG00000020524	Gria1	0.029761	0.034159	0.042595	-0.025169	-0.038813	-0.034397
55	KOup	ENSMUSG00000048076	Arf1	0.024479	0.03611	0.041845	-0.019546	-0.0398	-0.03551
56	KOup	ENSMUSG00000063077	Kif1b	0.024636	0.031705	0.043036	-0.016301	-0.052105	-0.021815
57	KOup	ENSMUSG00000002413	Braf	0.039255	0.024526	0.027354	0.002391	-0.069047	-0.004731
58	KOup	ENSMUSG00000006740	Kif5b	0.047259	0.025587	0.026275	0.01053	-0.063753	-0.020868
59	KOup	ENSMUSG00000057614	Gnai1	0.043224	0.032281	0.029713	-0.006971	-0.057397	-0.022605
60	KOup	ENSMUSG00000017978	Cadps2	0.032263	0.017958	0.046273	0.006738	-0.057375	-0.026116
61	KOup	ENSMUSG00000056073	Grik2	0.040194	0.009289	0.046997	0.009886	-0.060235	-0.021916
62	KOup	ENSMUSG00000026473	Glul	0.024779	0.032815	0.035881	0.000131	-0.058569	-0.021507
63	KOup	ENSMUSG00000028161	Ppp3ca	0.024267	0.026996	0.040769	0.000865	-0.060637	-0.018067
64	KOup	ENSMUSG00000022340	Sybu	0.031447	0.027036	0.037916	0.013393	-0.050859	-0.038747
65	KOup	ENSMUSG00000033676	Gabrb3	0.025072	0.025945	0.037657	0.021613	-0.054681	-0.035442
66	KOup	ENSMUSG00000096054	Syne1	0.033849	0.027809	0.038585	0.004315	-0.053515	-0.032442
67	KOup	ENSMUSG00000048330	Ric3	0.024432	0.035185	0.031404	0.009622	-0.056891	-0.028096
68	KOup	ENSMUSG00000003279	Dlgap1	0.009604	0.04482	0.037213	-0.021535	-0.04022	-0.029444
69	KOup	ENSMUSG00000031840	Rab3a	0.003801	0.050772	0.031202	-0.021192	-0.036979	-0.030157
70	KOup	ENSMUSG00000026959	Grin1	0.008787	0.048156	0.03147	-0.012086	-0.036525	-0.037631
71	KOup	ENSMUSG00000030302	Atp2b2	0.011555	0.050874	0.025972	-0.011739	-0.033602	-0.04032
72	KOup	ENSMUSG00000010066	Cacna2d2	0.013821	0.047278	0.023634	0.007613	-0.0436	-0.039286
73	KOup	ENSMUSG00000018411	Mapt	0.01657	0.051326	0.01756	0.002993	-0.043099	-0.036802
74	KOup	ENSMUSG00000024304	Cdh2	0.018029	0.05346	0.015835	-0.003784	-0.0406	-0.036068
75	KOup	ENSMUSG00000022812	Gsk3b	0.021032	0.042244	0.032124	-0.004734	-0.043315	-0.037751
76	KOup	ENSMUSG00000054814	Usp46	0.014767	0.04024	0.035972	-0.000767	-0.045509	-0.035985
77	KOup	ENSMUSG00000044708	Kcnj10	0.031709	0.040967	0.027312	-0.004677	-0.049999	-0.031646
78	KOup	ENSMUSG00000048142	Nat8l	0.019215	0.04806	0.023998	-0.007307	-0.048346	-0.028231
79	KOup	ENSMUSG00000020848	Doc2b	0.030639	0.049195	0.020739	-0.019913	-0.031277	-0.041903
80	KOup	ENSMUSG00000008892	Vdac3	0.02199	0.048213	0.023464	-0.00963	-0.029009	-0.047787
81	KOup	ENSMUSG00000024127	Prepl	0.027752	0.045105	0.027084	-0.012851	-0.034352	-0.043597
82	KOup	ENSMUSG00000029126	Nsg1	0.029033	0.047253	0.021683	-0.008332	-0.034493	-0.044701
83	KOup	ENSMUSG00000008153	Clstn3	0.020645	0.048101	0.020392	-0.00606	-0.021503	-0.05429
84	KOup	ENSMUSG00000079037	Prnp	0.023805	0.044109	0.028297	-0.015041	-0.022499	-0.051921
85	KOup	ENSMUSG00000024897	Apba1	0.014802	0.043273	0.036341	-0.019929	-0.026921	-0.044983
86	KOup	ENSMUSG00000022973	Synj1	0.025565	0.03695	0.039288	-0.016612	-0.031121	-0.045684
87	KOup	ENSMUSG00000057880	Abat	0.026766	0.03998	0.033513	-0.012063	-0.029956	-0.048671
88	KOup	ENSMUSG00000057897	Camk2b	0.01759	0.041957	0.02787	0.001903	-0.022629	-0.05744
89	KOup	ENSMUSG00000028020	Glrb	0.04824	0.033174	0.024163	0.003312	-0.031203	-0.055666
90	KOup	ENSMUSG00000032827	Ppp1r9a	0.038932	0.035515	0.027813	-0.001499	-0.027148	-0.05656
91	KOup	ENSMUSG00000024462	Gabbr1	0.031687	0.046741	0.014066	0.007141	-0.034648	-0.049612
92	KOup	ENSMUSG00000037217	Syn1	0.030736	0.043625	0.022467	-0.000759	-0.031087	-0.051569
93	KOup	ENSMUSG00000020402	Vdac1	0.028224	0.040884	0.02362	0.010603	-0.035864	-0.051429
94	KOup	ENSMUSG00000027805	Pfn2	0.033345	0.039268	0.023882	0.009291	-0.037515	-0.050464
95	KOup	ENSMUSG00000027273	Snap25	0.035565	0.033871	0.027285	0.012445	-0.033517	-0.055692
96	KOup	ENSMUSG00000009894	Snap47	0.028827	0.035835	0.025272	0.021401	-0.041364	-0.050103
97	KOup	ENSMUSG00000029467	Atp2a2	0.028746	0.039429	0.020513	0.021299	-0.042782	-0.047876
98	KOup	ENSMUSG00000053930	Shisa6	0.034856	0.039474	0.018176	0.018516	-0.040801	-0.049531
99	KOup	ENSMUSG00000068923	Syt11	0.040796	0.040361	0.014467	0.015932	-0.04151	-0.048076
100	KOup	ENSMUSG00000030310	Slc6a1	0.029803	0.027757	0.037063	0.014142	-0.034987	-0.054552
101	KOup	ENSMUSG00000066392	Nrxn3	0.022127	0.032851	0.035886	0.012947	-0.035862	-0.052354
102	KOup	ENSMUSG00000010803	Gabra1	0.051134	0.019477	0.026448	0.030438	-0.044599	-0.050843
103	KOup	ENSMUSG00000020436	Gabrg2	0.055076	0.022203	0.022905	0.026949	-0.045692	-0.049195
104	KOup	ENSMUSG00000013663	Pten	0.061713	0.019344	0.027439	0.016255	-0.046323	-0.046168
105	KOup	ENSMUSG00000020745	Pafah1b1	0.061045	0.019556	0.031392	0.008287	-0.045057	-0.045254
106	KOup	ENSMUSG00000036510	Cdh8	0.064097	0.008669	0.031025	0.026184	-0.046218	-0.047025
107	KOup	ENSMUSG00000007653	Gabrb2	0.061169	0.027274	0.017056	0.015699	-0.055289	-0.034918
108	KOup	ENSMUSG00000024261	Syt4	0.057014	0.02696	0.023518	0.009541	-0.055321	-0.033601
109	KOup	ENSMUSG00000017412	Cacnb4	0.054343	0.028023	0.022307	0.016502	-0.047441	-0.045006
110	KOup	ENSMUSG00000001847	Rac1	0.043206	0.030983	0.02897	0.010256	-0.044249	-0.046288
111	KOup	ENSMUSG00000033396	Spg11	0.043326	0.033957	0.022628	0.015183	-0.047427	-0.043854
112	KOup	ENSMUSG00000032186	Tmod2	0.049645	0.025923	0.030844	0.009468	-0.050759	-0.039423
113	KOup	ENSMUSG00000020428	Gabra6	0.047434	0.004779	0.040577	0.025964	-0.06113	-0.026236
114	KOup	ENSMUSG00000026103	Gls	0.055544	0.018192	0.029724	0.018297	-0.057438	-0.033383
115	KOup	ENSMUSG00000047879	Usp14	0.056585	0.010456	0.032491	0.024321	-0.059699	-0.030514
116	KOup	ENSMUSG00000029763	Exoc4	0.04561	0.022775	0.021355	0.03463	-0.059476	-0.033947
117	KOup	ENSMUSG00000036273	Lrrk2	0.046606	0.016398	0.023472	0.036319	-0.06509	-0.025342
118	KOup	ENSMUSG00000004771	Rab11a	0.062714	0.017977	0.017156	0.030399	-0.059677	-0.032267
119	KOup	ENSMUSG00000036902	Neto2	0.067857	0.006152	0.01756	0.03652	-0.065007	-0.022412
120	KOup	ENSMUSG00000052681	Rap1b	0.071842	0.013467	0.011939	0.038148	-0.051477	-0.042262
121	KOup	ENSMUSG00000006932	Ctnnb1	0.050245	0.031753	0.016762	0.022234	-0.04205	-0.050909
122	KOup	ENSMUSG00000005583	Mef2c	0.044566	0.036588	0.007504	0.031496	-0.045774	-0.046741
123	KOup	ENSMUSG00000032086	Bace1	0.042121	0.034734	0.011843	0.030739	-0.037985	-0.054788
124	KOup	ENSMUSG00000028222	Calb1	0.055082	0.02089	0.010746	0.045383	-0.053321	-0.041954
125	KOup	ENSMUSG00000004319	Clcn3	0.046931	0.024793	0.018225	0.037589	-0.051055	-0.044706
126	KOup	ENSMUSG00000033981	Gria2	0.042977	0.028382	0.015921	0.037916	-0.051461	-0.043729
127	KOup	ENSMUSG00000056755	Grm7	0.044492	0.028085	0.01847	0.033141	-0.052608	-0.042107
128	KOup	ENSMUSG00000052572	Dlg2	0.050219	0.02771	0.015676	0.031747	-0.053483	-0.04073
129	KOup	ENSMUSG00000063142	Kcnma1	0.043655	0.033313	0.010974	0.032327	-0.056174	-0.035898
130	KOup	ENSMUSG00000071424	Grid2	0.035491	0.033689	0.016152	0.034606	-0.048051	-0.046058
131	KOup	ENSMUSG00000022607	Ptk2	0.035391	0.026067	0.010978	0.054023	-0.041919	-0.053466
132	KOup	ENSMUSG00000057531	Dtnbp1	0.027825	0.036014	0.006518	0.048167	-0.049326	-0.043323
133	KOup	ENSMUSG00000013662	Atad1	0.064657	0.007292	0.036508	0.013428	-0.032648	-0.055856
134	KOup	ENSMUSG00000033419	Snap91	0.054413	0.013394	0.044019	0.000271	-0.039723	-0.046248
135	KOup	ENSMUSG00000028249	Sdcbp	0.07663	0.018836	0.015829	0.016785	-0.040821	-0.050046
136	KOup	ENSMUSG00000032336	Nptn	0.070726	0.020603	0.011809	0.025561	-0.034944	-0.056888
137	KOup	ENSMUSG00000031918	Mtmr2	0.065355	0.026683	0.014023	0.00506	-0.018967	-0.063824
138	KOup	ENSMUSG00000068798	Rap1a	0.053843	0.006785	0.022626	0.047948	-0.030961	-0.062316
139	KOup	ENSMUSG00000032356	Rasgrf1	0.020182	0.014761	0.056193	0.005722	-0.048657	-0.032845
140	KOup	ENSMUSG00000027162	Lin7c	0.034559	-0.005304	0.059169	0.018343	-0.033183	-0.048386
141	KOup	ENSMUSG00000033208	S100b	0.047183	0.001747	0.052501	0.011107	-0.038343	-0.046738
142	KOup	ENSMUSG00000037386	Rims2	0.037979	0.006785	0.058213	-0.004196	-0.039484	-0.03959
143	KOup	ENSMUSG00000029104	Htt	0.035069	0.020741	0.032567	0.034109	-0.04736	-0.047824
144	KOup	ENSMUSG00000024431	Nr3c1	0.026641	0.013498	0.047548	0.023502	-0.03414	-0.05504
145	KOup	ENSMUSG00000063887	Nlgn1	0.031382	0.013331	0.041911	0.031977	-0.038267	-0.054337
146	KOup	ENSMUSG00000027438	Napb	0.034328	0.010069	0.052133	0.01301	-0.046019	-0.040696
147	KOup	ENSMUSG00000038128	Camk4	0.032975	0.011649	0.051032	0.014308	-0.046781	-0.040639
148	KOup	ENSMUSG00000044288	Cnr1	0.027123	0.011706	0.048769	0.025514	-0.048807	-0.040961
149	KOup	ENSMUSG00000063358	Mapk1	0.036916	0.014108	0.041329	0.026077	-0.054101	-0.037498
150	KOup	ENSMUSG00000009394	Syn2	0.031504	0.023896	0.045814	-0.012417	-0.019488	-0.056699
151	KOup	ENSMUSG00000063434	Sorcs3	0.025239	-0.001938	0.062116	-0.016806	-0.001901	-0.056155
152	KOup	ENSMUSG00000019828	Grm1	0.027732	0.053677	3.8e-05	0.005985	-0.022321	-0.053392
153	KOup	ENSMUSG00000022935	Grik1	0.041897	0.05216	-0.006936	0.010791	-0.035215	-0.044151
154	KOup	ENSMUSG00000032452	Clstn2	0.024845	0.063813	-0.009421	-0.017163	-0.031062	-0.028069
155	KOup	ENSMUSG00000054477	Kcnn2	0.040527	0.056799	-0.005372	-0.010722	-0.038594	-0.030823
156	KOup	ENSMUSG00000024534	Sncaip	0.053392	0.055637	-0.040393	0.000529	-0.01365	-0.038947
157	KOup	ENSMUSG00000054934	Kcnmb4	0.028361	0.066116	-0.043985	-0.015181	-0.018884	-0.014868
158	KOup	ENSMUSG00000059714	Flot1	0.040448	0.063012	-0.035719	-0.033513	-0.019315	-0.013079
159	KOup	ENSMUSG00000024617	Camk2a	0.003304	0.070905	-0.02721	-0.022998	-0.022076	-0.011221
160	KOup	ENSMUSG00000061751	Kalrn	-0.002197	0.069209	-0.010342	-0.011359	-0.027718	-0.024036
161	KOup	ENSMUSG00000002985	Apoe	0.007952	0.048394	0.023662	-0.059329	0.002693	-0.037034
162	KOup	ENSMUSG00000000214	Th	0.008487	0.052808	0.023681	-0.057282	-0.013092	-0.027163
163	KOup	ENSMUSG00000028542	Slc6a9	0.019078	0.046394	0.031537	-0.05035	-0.018618	-0.033355
164	KOup	ENSMUSG00000039536	Stau1	0.013954	0.048787	0.029896	-0.053442	-0.018753	-0.028904
165	KOup	ENSMUSG00000022619	Mapk8ip2	-0.008122	0.049096	0.036531	-0.036548	-0.015003	-0.037805
166	KOup	ENSMUSG00000015837	Sqstm1	0.000585	0.042383	0.040876	-0.045322	-0.008998	-0.040057
167	KOup	ENSMUSG00000028833	Ncdn	0.005698	0.04125	0.040281	-0.049384	-0.008206	-0.039362
168	KOup	ENSMUSG00000025892	Gria4	0.011723	0.046068	0.036523	-0.037265	-0.02869	-0.032073
169	KOup	ENSMUSG00000030519	Apba2	-0.000715	0.036156	0.051558	-0.042941	-0.023125	-0.029802
170	KOup	ENSMUSG00000039652	Cpeb3	0.009015	0.039117	0.045331	-0.049004	-0.027671	-0.024058
171	KOup	ENSMUSG00000020262	Adarb1	-0.000536	0.028321	0.053815	-0.067172	-0.011639	-0.018524
172	KOup	ENSMUSG00000033768	Nrxn2	-0.022906	0.02874	0.057212	-0.061912	-0.017745	-0.006034
173	KOup	ENSMUSG00000039953	Clstn1	-0.013488	0.038392	0.049666	-0.056251	-0.020124	-0.016327
174	KOup	ENSMUSG00000026797	Stxbp1	-0.017679	0.043183	0.044538	-0.049731	-0.008536	-0.030573
175	KOup	ENSMUSG00000032562	Gnai2	-0.017242	0.048484	0.03441	-0.058984	-0.003025	-0.02614
176	KOup	ENSMUSG00000033577	Myo6	-0.010115	0.030415	0.049514	-0.065337	0.005178	-0.029547
177	KOup	ENSMUSG00000020886	Dlg4	0.004146	0.017665	0.064491	-0.041938	-0.013853	-0.035733
178	KOup	ENSMUSG00000046876	Atxn1	-0.010746	0.023753	0.05954	-0.040994	-0.001524	-0.041836
179	KOup	ENSMUSG00000022568	Scrib	-0.026244	0.046784	0.02676	-0.050148	0.017719	-0.039535
180	KOup	ENSMUSG00000030731	Syt3	-0.010322	0.046966	0.021481	-0.049006	0.017722	-0.045305
181	KOup	ENSMUSG00000041936	Agrn	-0.007717	0.047127	0.023943	-0.047529	0.013425	-0.045925
182	KOup	ENSMUSG00000022240	Ctnnd2	0.016549	0.046739	0.029708	-0.038374	-0.044306	-0.012617
183	KOup	ENSMUSG00000039671	Zmynd8	0.020936	0.051232	0.0212	-0.054132	-0.03255	-0.013021
184	KOup	ENSMUSG00000017740	Slc12a5	0.005325	0.058226	0.017528	-0.034416	-0.03628	-0.017602
185	KOup	ENSMUSG00000026965	Anapc2	0.00088	0.06236	0.011903	-0.025479	-0.027979	-0.028898
186	KOup	ENSMUSG00000067889	Sptbn2	0.003145	0.062888	0.005168	-0.052862	-0.018726	-0.014749
187	KOup	ENSMUSG00000020484	Xbp1	0.009631	0.039074	0.039328	-0.023213	-0.011978	-0.05329
188	KOup	ENSMUSG00000035735	Dagla	-0.000296	0.042873	0.034603	-0.016191	-0.007841	-0.056126
189	KOup	ENSMUSG00000022905	Kpna1	0.001467	0.067467	-0.01317	-0.035477	-0.002115	-0.031068
190	KOup	ENSMUSG00000020866	Cacna1g	0.0054	0.060957	0.009985	-0.030702	-0.013879	-0.039204
191	KOup	ENSMUSG00000020894	Vamp2	0.003586	0.062211	0.002011	-0.021989	-0.007313	-0.04503
192	KOup	ENSMUSG00000042429	Adora1	0.004799	0.056902	0.014257	-0.041628	-0.003628	-0.041355
193	KOup	ENSMUSG00000003863	Ppfia3	-0.027662	0.059744	0.021706	-0.022879	-0.010778	-0.037472
194	KOup	ENSMUSG00000022892	App	-0.018232	0.061403	0.018632	-0.024607	-0.016805	-0.034641
195	KOup	ENSMUSG00000062785	Kcnc3	-0.016504	0.06343	0.008874	-0.017767	-0.009372	-0.041329
196	KOup	ENSMUSG00000031883	Car7	0.006222	0.055485	0.003473	0.007269	-0.01184	-0.057106
197	KOup	ENSMUSG00000022415	Syngr1	0.008071	0.053186	0.015256	-0.010142	-0.011119	-0.055028
198	KOup	ENSMUSG00000038665	Dgki	0.00992	0.053738	0.01832	-0.014514	-0.017144	-0.050227
199	KOup	ENSMUSG00000056201	Cfl1	0.014002	0.057625	0.008501	-0.01665	-0.014701	-0.048711
200	KOup	ENSMUSG00000051391	Ywhag	0.013837	0.054849	0.015716	-0.007026	-0.028636	-0.044855
201	KOup	ENSMUSG00000034656	Cacna1a	-0.007202	0.05986	0.012449	0.001905	-0.028722	-0.040592
202	KOup	ENSMUSG00000078816	Prkcg	-0.002214	0.058873	0.013301	-0.007182	-0.019667	-0.046221
203	KOup	ENSMUSG00000007659	Bcl2l1	-0.01751	0.050969	0.020077	-0.018724	-0.053979	0.008369
204	KOup	ENSMUSG00000010825	Grid2ip	-0.020999	0.062787	0.001788	-0.012613	-0.045868	0.002355
205	KOup	ENSMUSG00000000881	Dlg3	-0.007932	0.029623	0.048317	-0.019943	-0.056045	0.00176
206	KOup	ENSMUSG00000027287	Snap23	-0.026412	0.037629	0.049856	-0.03875	-0.038676	-0.001272
207	KOup	ENSMUSG00000002028	Kmt2a	-0.039544	0.050525	0.034793	-0.017939	-0.042003	-0.004205
208	KOup	ENSMUSG00000045038	Prkce	-0.042153	0.045111	0.034784	-0.019554	-0.04756	0.009808
209	KOup	ENSMUSG00000033174	Mgll	-0.02701	0.040462	0.037686	-0.023048	-0.052362	0.010225
210	KOup	ENSMUSG00000024743	Syt7	-0.012337	0.053969	0.031095	-0.018957	-0.033537	-0.028747
211	KOup	ENSMUSG00000025580	Eif4a3	-0.015965	0.047062	0.036351	-0.021015	-0.047771	-0.008168
212	KOup	ENSMUSG00000037541	Shank2	-0.004132	0.049897	0.033217	-0.025261	-0.043054	-0.017193
213	KOup	ENSMUSG00000025499	Hras	-0.059762	0.032143	0.047961	-0.002418	-0.047063	0.009086
214	KOup	ENSMUSG00000021701	Plk2	-0.06316	0.027102	0.04861	0.038054	-0.041087	-0.01908
215	KOup	ENSMUSG00000003200	Sh3gl1	-0.054627	0.042093	0.04765	0.001046	-0.032983	-0.020896
216	KOup	ENSMUSG00000068206	Pick1	-0.037685	0.035106	0.050753	0.010154	-0.043479	-0.022418
217	KOup	ENSMUSG00000027950	Chrnb2	-0.045866	0.05912	0.014267	0.021427	-0.031598	-0.029066
218	KOup	ENSMUSG00000004113	Cacna1b	-0.013538	0.015761	0.067046	-0.010116	-0.043699	-0.017343
219	KOup	ENSMUSG00000001018	Snapin	0.005871	0.021257	0.061082	-0.019924	-0.023155	-0.043403
220	KOup	ENSMUSG00000005672	Kit	-0.002532	0.033433	0.052985	-0.014943	-0.030612	-0.039355
221	KOup	ENSMUSG00000041670	Rims1	-0.007607	0.036444	0.05251	-0.025478	-0.026051	-0.036184
222	KOup	ENSMUSG00000015829	Tnr	-0.019833	0.034751	0.055134	-0.011541	-0.033199	-0.032004
223	KOup	ENSMUSG00000055254	Ntrk2	-0.010381	0.035233	0.052552	-0.011279	-0.037696	-0.031402
224	KOup	ENSMUSG00000061601	Pclo	-0.00424	0.037296	0.049475	-0.015665	-0.039713	-0.029238
225	KOup	ENSMUSG00000031654	Cbln1	-0.027323	0.017206	0.066696	-0.012094	-0.008642	-0.044808
226	KOup	ENSMUSG00000042700	Sipa1l1	-0.011137	0.00772	0.067865	-0.014287	-0.002902	-0.050197
227	KOup	ENSMUSG00000031214	Ophn1	0.018825	0.024285	0.037427	0.016346	-0.01458	-0.06721
228	KOup	ENSMUSG00000031393	Mecp2	0.001241	0.036273	0.041943	0.001677	-0.022108	-0.05497
229	KOup	ENSMUSG00000030691	Fchsd2	0.003256	0.039154	0.033408	0.018632	-0.033298	-0.051872
230	KOup	ENSMUSG00000057914	Cacnb2	-0.000305	0.038522	0.038044	0.012108	-0.030502	-0.051562
231	KOup	ENSMUSG00000063239	Grm4	-0.013587	0.043953	0.028007	0.02092	-0.019735	-0.057278
232	KOup	ENSMUSG00000053024	Cntn2	-0.002289	0.017898	0.049177	0.035771	-0.050597	-0.035418
233	KOup	ENSMUSG00000054423	Cadps	-0.012244	0.034109	0.048534	0.007041	-0.046901	-0.028975
234	KOup	ENSMUSG00000067629	Syngap1	-0.025968	0.035981	0.043031	0.026452	-0.039897	-0.038549
235	KOup	ENSMUSG00000049511	Htr1b	-0.035821	0.030031	0.035773	0.048749	-0.021316	-0.054725
236	KOup	ENSMUSG00000026179	Pnkd	-0.036838	-0.033692	0.06717	-0.034321	0.036339	-0.017492
237	KOup	ENSMUSG00000000838	Fmr1	-0.001486	0.011058	0.050116	-0.029561	0.023201	-0.059212
238	KOup	ENSMUSG00000051149	Adnp	-0.014616	0.015212	0.04865	-0.069667	0.028209	-0.030961
239	KOup	ENSMUSG00000022208	Jph4	-0.049147	-0.008127	0.077419	-0.042552	0.001632	-0.004316
240	KOup	ENSMUSG00000000632	Sez6	-0.032855	0.015075	0.06827	-0.055754	-0.004834	-0.013688
241	KOup	ENSMUSG00000003575	Crtc1	-0.024843	-0.002045	0.068544	-0.069556	0.006713	-0.003202
242	KOup	ENSMUSG00000031778	Cx3cl1	-0.027608	0.013595	0.061572	-0.069248	0.010142	-0.015021
243	KOup	ENSMUSG00000025867	Cplx2	-0.031758	0.006599	0.051146	-0.086153	0.018449	0.007672
244	KOup	ENSMUSG00000029361	Nos1	-0.058748	0.022435	0.04625	-0.073739	0.004188	0.017946
245	KOup	ENSMUSG00000029608	Rph3a	-0.049866	0.010074	0.056136	-0.074432	0.004892	0.016061
246	KOup	ENSMUSG00000022623	Shank3	-0.060095	0.029853	0.051331	-0.052857	-0.018636	0.015109
247	KOup	ENSMUSG00000041488	Stx3	-0.049362	0.01225	0.060581	-0.054786	-0.022006	0.023155
248	KOup	ENSMUSG00000021448	Shc3	-0.089651	0.024088	0.053626	-0.034525	0.013165	-0.008884
249	KOup	ENSMUSG00000005469	Prkaca	-0.044045	0.050231	0.035892	-0.052834	-0.015935	-0.00424
250	KOup	ENSMUSG00000034730	Adgrb1	-0.04163	0.04602	0.042661	-0.052462	-0.015286	-0.008475
251	KOup	ENSMUSG00000056553	Ptprn2	-0.062109	0.042033	0.03548	-0.060135	0.013459	-0.009542
252	KOup	ENSMUSG00000035390	Brsk1	-0.037809	0.035643	0.057497	-0.029129	-0.026944	-0.01821
253	KOup	ENSMUSG00000034799	Unc13a	-0.054184	0.032282	0.058626	-0.034003	-0.024663	-0.004797
254	KOup	ENSMUSG00000045114	Prrt2	-0.064134	0.026039	0.064237	-0.027196	-0.014653	-0.0126
255	KOup	ENSMUSG00000038486	Sv2a	-0.047959	0.052245	0.036436	-0.032749	-0.007377	-0.027478
256	KOup	ENSMUSG00000038738	Shank1	-0.062778	0.050149	0.040065	-0.019905	-0.021246	-0.01456
257	KOup	ENSMUSG00000069729	Arid1b	-0.038368	0.055471	0.031553	-0.013021	-0.019044	-0.034115
258	KOup	ENSMUSG00000017314	Mpp2	-0.072818	-0.015733	0.063143	-0.034681	-0.009851	0.037063
259	KOup	ENSMUSG00000036062	Phf24	-0.021099	0.000427	0.066066	0.003665	-0.054819	0.00557
260	KOup	ENSMUSG00000045573	Penk	-0.038666	-0.001153	0.075684	-0.021322	-0.033998	0.005315
261	KOup	ENSMUSG00000060216	Arrb2	-0.05089	0.002501	0.059725	-0.012875	-0.046326	0.030187
262	KOup	ENSMUSG00000018634	Crhr1	0.005638	-0.004657	0.070533	-0.029995	-0.044311	0.00367
263	KOup	ENSMUSG00000022770	Dlg1	0.020844	0.013313	0.04509	0.001396	-0.067755	0.001084
264	KOup	ENSMUSG00000020918	Kat2a	0.029027	0.034621	0.034479	-0.028844	-0.055931	-0.006824
265	KOup	ENSMUSG00000020734	Grin2c	0.013024	0.027475	0.052509	-0.024083	-0.048496	-0.01731
266	KOup	ENSMUSG00000062151	Unc13c	0.021196	0.018095	0.051827	-0.016555	-0.058107	-0.007407
267	KOup	ENSMUSG00000053025	Sv2b	0.043879	0.012333	0.046112	-0.028129	-0.058176	-0.001642
268	KOup	ENSMUSG00000027895	Kcnc4	0.022484	-0.017792	0.067521	-0.069235	0.001546	-0.009484
269	KOup	ENSMUSG00000003352	Cacnb3	0.02078	0.029011	0.044605	-0.051175	-0.045306	-0.000419
270	KOup	ENSMUSG00000019433	Gipc1	0.032769	0.010891	0.049602	-0.064273	-0.040016	0.01031
271	KOup	ENSMUSG00000030201	Lrp6	0.007436	0.023228	0.046027	-0.077056	-0.027033	0.011856
272	KOup	ENSMUSG00000020708	Psmc5	0.026971	0.011285	0.062429	-0.052494	-0.01911	-0.02815
273	KOup	ENSMUSG00000070570	Slc17a7	0.017411	0.020652	0.058848	-0.048046	-0.034474	-0.016139
274	KOup	ENSMUSG00000062542	Syt9	0.035583	0.023594	0.038431	-0.085958	-0.010294	-0.009424
275	KOup	ENSMUSG00000027584	Oprl1	0.073321	-0.017058	0.027528	-0.031562	-0.056845	0.028964
276	KOup	ENSMUSG00000062995	Ica1	0.06223	0.026733	0.003363	-0.065623	-0.043518	0.023058
277	KOup	ENSMUSG00000020091	Eif4ebp2	0.008389	0.022323	0.036716	-0.049084	-0.053166	0.027748
278	KOup	ENSMUSG00000062661	Ncs1	-0.01661	0.033877	0.028819	-0.043394	-0.050735	0.031599
279	KOup	ENSMUSG00000038349	Plcl1	-0.007773	0.010759	0.020852	-0.013006	-0.064979	0.050482
280	KOup	ENSMUSG00000030376	Slc8a2	-0.021976	-0.031547	0.060992	-0.035782	-0.028285	0.044396
281	KOup	ENSMUSG00000029084	Cd38	0.011305	-0.029722	0.04911	-0.071149	-0.013816	0.043521
282	KOup	ENSMUSG00000096883	Shisa8	0.00255	-0.032786	0.069386	-0.051594	-0.018024	0.023881
283	KOup	ENSMUSG00000031343	Gabra3	0.053978	-0.038063	0.067532	-0.027164	-0.016095	-0.019277
284	KOup	ENSMUSG00000031772	Cntnap4	0.059889	-0.025537	0.062461	-0.00673	-0.024989	-0.03646
285	KOup	ENSMUSG00000003974	Grm3	0.002589	0.018938	0.018477	0.040018	-0.075614	0.011329
286	KOup	ENSMUSG00000026249	Serpine2	0.005439	0.032635	0.008793	0.005386	-0.071803	0.024973
287	KOup	ENSMUSG00000031538	Plat	-0.004372	0.051794	-0.044739	0.050743	-0.047505	0.002995
288	KOup	ENSMUSG00000035566	Pcdh17	-0.006644	0.063987	-0.024056	0.031861	-0.02866	-0.033092
289	KOup	ENSMUSG00000027130	Slc12a6	-0.011843	0.043675	-0.022233	0.076897	-0.039578	-0.031389
290	KOup	ENSMUSG00000049303	Syt12	0.012279	0.030159	-0.057217	0.086914	-0.008758	-0.038761
291	KOup	ENSMUSG00000025277	Abhd6	0.076277	0.006705	-0.042988	0.064574	-0.002983	-0.056272
292	KOup	ENSMUSG00000026235	Epha4	0.090561	0.01519	-0.014976	0.03325	-0.057856	-0.020687
293	KOup	ENSMUSG00000033214	Slitrk5	0.032601	0.014082	0.004308	0.063173	-0.010186	-0.072408
294	KOup	ENSMUSG00000034472	Rasd2	0.002953	-0.006714	0.011401	0.060373	0.027021	-0.075819
295	KOup	ENSMUSG00000025586	Cpeb1	0.038615	-0.008291	0.046593	0.038751	-0.060076	-0.023093
296	KOup	ENSMUSG00000029054	Gabrd	-0.018016	-0.014503	0.064499	0.037573	-0.053888	-0.004451
297	KOup	ENSMUSG00000032108	D730048I06Rik	0.010648	-0.026398	-0.009482	0.120868	-0.031983	-0.02334
298	KOup	ENSMUSG00000071862	Lrrtm2	0.018635	-0.035705	0.032955	0.08631	-0.049317	-0.015074
299	KOup	ENSMUSG00000051111	Sv2c	0.017168	0.027484	0.006938	0.066534	-0.056082	-0.034567
300	KOup	ENSMUSG00000062209	Erbb4	0.037769	-0.003273	-0.002377	0.092561	-0.05541	-0.025898
301	KOdown	ENSMUSG00000002771	Grin2d	-0.003151	0.021491	-0.063482	-0.055329	0.021869	0.054543
302	KOdown	ENSMUSG00000010609	Psen2	-0.00547	-0.003762	-0.076369	-0.017128	0.021195	0.067377
303	KOdown	ENSMUSG00000027220	Syt13	0.032816	0.049468	-0.066054	-0.046988	0.011413	0.011208
304	KOdown	ENSMUSG00000000120	Ngfr	-0.018098	0.044927	-0.071509	-0.01929	0.042842	-0.000341
305	KOdown	ENSMUSG00000044043	Pcdhb14	0.042695	0.038161	-0.083588	0.002088	0.024085	-0.014849
306	KOdown	ENSMUSG00000046387	Pcdhb17	0.012138	0.009817	-0.096597	0.007939	0.035651	0.028654
307	KOdown	ENSMUSG00000025889	Snca	0.034287	-0.010036	-0.021247	-0.029187	-0.043034	0.073989
308	KOdown	ENSMUSG00000022765	Snap29	0.046212	0.047859	-0.046699	-0.010582	-0.04628	0.020551
309	KOdown	ENSMUSG00000030805	Stx4a	0.017274	0.04119	-0.040269	-0.038828	-0.03653	0.04899
310	KOdown	ENSMUSG00000003037	Rab8a	0.098462	0.011103	-0.038126	0.003664	-0.054829	0.017787
311	KOdown	ENSMUSG00000048347	Pcdhb18	0.08166	-0.0066	-0.059422	0.017611	-0.04329	0.043901
312	KOdown	ENSMUSG00000024873	Cnih2	0.087992	0.011397	-0.072553	-0.030442	-0.009339	0.032724
313	KOdown	ENSMUSG00000047225	Olfr684	0.121872	-0.00941	-0.052399	-0.041583	0.012997	0.000272
314	KOdown	ENSMUSG00000034997	Htr2a	0.078745	-0.030767	-0.0654	-0.015021	-0.001403	0.056136
315	KOdown	ENSMUSG00000035383	Pmch	0.103202	-0.038536	-0.040506	-0.022851	-0.016102	0.047284
316	KOdown	ENSMUSG00000038676	Ucn	0.103202	-0.038536	-0.040506	-0.022851	-0.016102	0.047284
317	KOdown	ENSMUSG00000020882	Cacnb1	-0.029719	-0.007792	-0.005026	-0.035903	0.080397	-0.026592
318	KOdown	ENSMUSG00000004961	Syt5	0.03764	-0.008709	-0.019261	-0.058254	0.069703	-0.026408
319	KOdown	ENSMUSG00000005102	Eif2ak4	0.049054	-0.028805	0.003775	-0.069499	0.060736	-0.016462
320	KOdown	ENSMUSG00000045062	Pcdhb7	0.035692	-0.028485	0.003484	-0.085948	0.055372	0.008694
321	KOdown	ENSMUSG00000020388	Pdlim4	0.020046	-0.041603	-0.025279	-0.061809	0.060462	0.035613
322	KOdown	ENSMUSG00000030854	Ptpn5	0.009818	-0.032805	-0.011634	-0.072353	0.066195	0.021816
323	KOdown	ENSMUSG00000038418	Egr1	0.040591	-0.047033	-0.018951	-0.009455	0.073266	-0.027209
324	KOdown	ENSMUSG00000052301	Doc2a	0.035477	-0.024878	-0.039737	-0.02654	0.077318	-0.02001
325	KOdown	ENSMUSG00000007207	Stx1a	-0.031062	-0.020377	0.021064	-0.067815	0.066978	-0.000272
326	KOdown	ENSMUSG00000003378	Grik5	-0.030964	-0.031677	0.005952	-0.069551	0.060896	0.032611
327	KOdown	ENSMUSG00000037992	Rara	-0.044997	-0.022393	0.013996	-0.07285	0.057474	0.029997
328	KOdown	ENSMUSG00000049107	Ntf3	-0.038317	-0.029565	-0.012344	-0.056415	0.068145	0.034844
329	KOdown	ENSMUSG00000004931	Apba3	-0.029257	-0.01074	0.011442	-0.090168	0.034541	0.046661
330	KOdown	ENSMUSG00000032482	Cspg5	-0.025737	-0.00332	0.02732	-0.094219	0.017658	0.042583
331	KOdown	ENSMUSG00000038524	Fchsd1	0.00107	-0.039801	0.02647	-0.080995	0.028	0.044811
332	KOdown	ENSMUSG00000003872	Lin7b	-0.004914	-0.014593	-0.023361	-0.079456	0.032452	0.062339
333	KOdown	ENSMUSG00000030409	Dmpk	-0.017625	-0.041094	0.006397	-0.05726	0.014439	0.072876
334	KOdown	ENSMUSG00000045730	Adrb2	-0.032115	-0.045056	0.000892	-0.053483	0.041106	0.060661
335	KOdown	ENSMUSG00000034675	Dbn1	-0.065187	0.023877	-0.015325	-0.068003	0.050995	0.024507
336	KOdown	ENSMUSG00000006435	Neurl1a	0.002489	0.025138	0.021815	-0.09433	-0.011717	0.03152
337	KOdown	ENSMUSG00000023017	Asic1	0.019298	0.001264	0.006214	-0.104199	0.01364	0.041212
338	KOdown	ENSMUSG00000032890	Rims3	0.012432	0.031157	-0.019043	-0.069423	-0.026567	0.054288
339	KOdown	ENSMUSG00000062202	Btbd9	0.015787	0.024774	0.001714	-0.083046	-0.024759	0.04766
340	KOdown	ENSMUSG00000006930	Hap1	0.029423	0.030646	-0.012616	-0.096406	0.030518	-0.000815
341	KOdown	ENSMUSG00000042589	Cux2	0.002571	0.030369	-0.025317	-0.092688	0.035885	0.019122
342	KOdown	ENSMUSG00000017831	Rab5a	-0.00022	0.054594	-0.016858	-0.065642	0.027382	-0.02233
343	KOdown	ENSMUSG00000048376	F2r	0.041271	0.047286	-0.020796	-0.071129	0.019514	-0.024237
344	KOdown	ENSMUSG00000022594	Lynx1	-0.008506	0.050911	0.024509	-0.071667	-0.013844	-0.004756
345	KOdown	ENSMUSG00000025318	Jph3	-0.013507	0.033508	0.03391	-0.089663	0.004285	0.001732
346	KOdown	ENSMUSG00000021546	Hnrnpk	-0.014675	0.050015	0.020386	-0.07205	0.009981	-0.020543
347	KOdown	ENSMUSG00000034891	Sncb	-0.010468	0.052395	0.009257	-0.068157	0.017914	-0.026261
348	KOdown	ENSMUSG00000020827	Mink1	-0.034027	0.054497	-0.005338	-0.069496	0.025647	-0.007874
349	KOdown	ENSMUSG00000037058	Paip2	-0.022433	0.059752	-0.006828	-0.057465	0.021144	-0.022817
350	KOdown	ENSMUSG00000033615	Cplx1	-0.041277	0.039809	0.022899	-0.082354	0.019181	0.001567
351	KOdown	ENSMUSG00000051790	Nlgn2	-0.033655	0.049714	0.014997	-0.076006	0.015649	-0.006882
352	KOdown	ENSMUSG00000031144	Syp	-0.051959	0.056663	0.007443	-0.063281	0.011199	-0.000551
353	KOdown	ENSMUSG00000035226	Rims4	-0.046656	0.060902	-0.014362	-0.059905	0.007368	0.013366
354	KOdown	ENSMUSG00000038976	Ppp1r9b	-0.044005	0.032206	0.018394	-0.087645	0.010291	0.028047
355	KOdown	ENSMUSG00000018589	Glra2	-0.05526	0.029128	-0.025883	0.026156	0.055405	-0.048486
356	KOdown	ENSMUSG00000038255	Neurod2	-0.010578	0.013465	-0.038338	0.013691	0.066977	-0.050937
357	KOdown	ENSMUSG00000023064	Sncg	0.018732	-0.000101	-0.073195	0.059634	0.047999	-0.035812
358	KOdown	ENSMUSG00000031574	Star	-0.00686	0.019328	-0.073559	0.038385	0.053395	-0.030564
359	KOdown	ENSMUSG00000029428	Stx2	-0.047945	0.010121	-0.077776	0.034079	0.058105	0.00576
360	KOdown	ENSMUSG00000003411	Rab3b	0.005744	-0.013294	0.002748	0.020824	0.058915	-0.067539
361	KOdown	ENSMUSG00000030525	Chrna7	-0.012302	-0.047122	0.0408	0.049984	0.034246	-0.051917
362	KOdown	ENSMUSG00000026849	Tor1a	-0.064267	-0.004833	0.044497	0.012267	0.043857	-0.050708
363	KOdown	ENSMUSG00000021609	Slc6a3	-0.053957	-0.034705	-0.004414	0.020202	0.079205	-0.023336
364	KOdown	ENSMUSG00000054453	Sytl5	-0.058161	-0.031565	0.031264	0.019423	0.062213	-0.038659
365	KOdown	ENSMUSG00000055078	Gabra5	-0.031104	-0.04187	0.03342	-0.00138	0.065258	-0.034703
366	KOdown	ENSMUSG00000000058	Cav2	-0.033889	-0.081877	0.015236	0.034615	0.036111	0.029269
367	KOdown	ENSMUSG00000048482	Bdnf	-0.034518	-0.078837	0.028486	0.037754	0.007304	0.04176
368	KOdown	ENSMUSG00000023052	Npff	-0.083237	-0.038728	-0.00095	0.099851	0.031935	-0.012599
369	KOdown	ENSMUSG00000031255	Sytl4	-0.06237	-0.042216	0.003859	0.098619	0.034376	-0.027613
370	KOdown	ENSMUSG00000047854	Stx19	-0.05379	-0.055347	0.033933	0.085194	0.01951	-0.021969
371	KOdown	ENSMUSG00000035594	Chrna5	-0.060933	-0.052743	-0.02453	0.067283	0.060474	0.003732
372	KOdown	ENSMUSG00000000263	Glra1	-0.031652	-0.065705	0.027243	0.090051	-0.016507	0.015032
373	KOdown	ENSMUSG00000021367	Edn1	-0.021039	-0.072302	0.00258	0.099707	0.002206	0.011924
374	KOdown	ENSMUSG00000047910	Pcdhb16	-0.057987	-0.058842	0.039702	0.069182	-0.01748	0.028226
375	KOdown	ENSMUSG00000047033	Pcdhb15	-0.023391	-0.044367	0.016567	0.084738	-0.048316	0.034257
376	KOdown	ENSMUSG00000079388	2610042L04Rik	-0.047843	-0.038225	0.047847	0.088928	-0.021998	-0.015939
377	KOdown	ENSMUSG00000006398	Cdc20	0.040164	-0.050608	-0.037456	0.086102	0.035051	-0.03481
378	KOdown	ENSMUSG00000050321	Neto1	0.02861	-0.059914	-0.024953	0.066109	0.051314	-0.032223
379	KOdown	ENSMUSG00000024868	Dkk1	0.001847	-0.050491	-0.053123	0.074454	0.055486	-0.010243
380	KOdown	ENSMUSG00000035283	Adrb1	7.9e-05	-0.066633	-0.030505	0.06457	0.057201	-0.007979
381	KOdown	ENSMUSG00000028456	Unc13b	0.016336	-0.031629	-0.086548	0.07291	0.021621	0.028023
382	KOdown	ENSMUSG00000044014	Npy5r	0.014293	-0.052528	-0.068189	0.076819	0.037284	0.015151
383	KOdown	ENSMUSG00000021919	Chat	-0.008213	-0.0371	-0.039001	0.12312	0.010515	-0.019192
384	KOdown	ENSMUSG00000035773	Kiss1r	-0.025989	-0.033151	-0.07351	0.090592	0.025322	0.02685
385	KOdown	ENSMUSG00000041189	Chrnb1	-0.0287	-0.013856	-0.069028	0.104804	0.028044	-0.008369
386	KOdown	ENSMUSG00000045731	Pnoc	-0.016212	-0.029778	-0.065387	0.108991	0.0244	-0.002039
387	KOdown	ENSMUSG00000046856	Gpr1	-0.000958	-0.046159	-0.059442	0.108358	0.012039	0.01336
388	KOdown	ENSMUSG00000061762	Tac1	-0.042091	-0.054338	-0.029322	0.110408	0.02347	0.005847
389	KOdown	ENSMUSG00000022144	Gdnf	-0.017049	-0.075847	0.019968	-0.009277	0.051651	0.023718
390	KOdown	ENSMUSG00000028631	Kcnq4	-0.032336	-0.070027	0.03391	-0.00892	0.051528	0.014058
391	KOdown	ENSMUSG00000043051	Disc1	-0.057976	-0.058309	0.024796	-0.019382	0.054294	0.030342
392	KOdown	ENSMUSG00000043895	S1pr2	-0.068073	-0.06359	0.016126	0.013489	0.054683	0.026106
393	KOdown	ENSMUSG00000026514	Cnih3	-0.10312	-0.040586	-0.001781	0.017348	0.045033	0.047073
394	KOdown	ENSMUSG00000023072	Cep89	-0.101752	-0.037877	0.022173	-0.005586	0.032273	0.050906
395	KOdown	ENSMUSG00000060780	Lrrtm1	-0.116675	-0.031624	0.027574	0.008459	0.032339	0.038498
396	KOdown	ENSMUSG00000017737	Mmp9	-0.080805	-0.04226	-0.023336	0.010395	0.046225	0.05876
397	KOdown	ENSMUSG00000028664	Ephb2	-0.07367	-0.041012	-0.02655	0.010008	0.032354	0.070633
398	KOdown	ENSMUSG00000042121	Ssh1	-0.079991	-0.034303	0.000686	-0.022557	0.028028	0.070142
399	KOdown	ENSMUSG00000047307	Pcdhb13	-0.082129	-0.029243	-0.017871	-0.01963	0.052198	0.056285
400	KOdown	ENSMUSG00000030209	Grin2b	-0.077824	-0.038449	-0.01502	-0.006922	0.067506	0.035845
401	KOdown	ENSMUSG00000024211	Grm8	-0.074044	-0.05056	-0.008359	-0.000272	0.055553	0.047523
402	KOdown	ENSMUSG00000049112	Oxtr	-0.065916	-0.051283	-0.023198	0.010515	0.058706	0.046056
403	KOdown	ENSMUSG00000056961	Olfr919	-0.070825	-0.060116	-0.005187	0.021468	0.055786	0.036886
404	KOdown	ENSMUSG00000051599	Pcdhb2	-0.045296	-0.063279	-0.006543	-0.003362	0.060487	0.038766
405	KOdown	ENSMUSG00000039714	Cplx3	-0.059995	-0.051093	-0.031114	0.02619	0.066721	0.03019
406	KOdown	ENSMUSG00000024871	Doc2g	-0.091626	-0.008567	-0.057964	0.070923	0.030155	0.035834
407	KOdown	ENSMUSG00000014609	Chrne	-0.059506	-0.038857	-0.048341	0.072911	0.008425	0.059803
408	KOdown	ENSMUSG00000047495	Dlgap2	-0.069935	-0.023144	-0.058504	0.045855	0.022554	0.063849
409	KOdown	ENSMUSG00000000617	Grm6	-0.027106	-0.073524	-0.027662	0.046113	0.042001	0.0416
410	KOdown	ENSMUSG00000026656	Fcgr2b	-0.012679	-0.073977	-0.032861	0.054821	0.048233	0.025554
411	KOdown	ENSMUSG00000020787	P2rx1	-0.058067	-0.064174	-0.018762	0.032532	0.046332	0.047663
412	KOdown	ENSMUSG00000012705	Retn	-0.04748	-0.060505	-0.032863	0.02971	0.053209	0.04533
413	KOdown	ENSMUSG00000031492	Chrnb3	-0.047115	-0.060348	-0.03524	0.041879	0.056583	0.035034
414	KOdown	ENSMUSG00000049409	Prokr1	-0.061298	-0.057613	-0.032281	0.046727	0.047555	0.043894
415	KOdown	ENSMUSG00000045498	Pcdhb3	-0.042679	-0.063414	-0.036855	0.048642	0.042993	0.046161
416	KOdown	ENSMUSG00000041380	Htr2c	-0.040977	-0.064242	-0.031508	0.040634	0.030242	0.059871
417	KOdown	ENSMUSG00000094353	Olfr150	-0.05495	-0.052884	-0.038957	0.036	0.034752	0.062049
418	KOdown	ENSMUSG00000026344	Lypd1	-0.029129	-0.062262	-0.043493	0.035359	0.043581	0.051686
419	KOdown	ENSMUSG00000017756	Slc12a7	-0.038532	-0.048083	-0.048678	0.020627	0.03361	0.068161
420	KOdown	ENSMUSG00000030043	Tacr1	-0.033753	-0.05209	-0.052123	0.027506	0.045376	0.055601
421	KOdown	ENSMUSG00000035200	Chrnb4	-0.03638	-0.051216	-0.049476	0.020791	0.046786	0.057174
422	KOdown	ENSMUSG00000034117	Ptgdr2	-0.0266	-0.050895	-0.052946	0.016385	0.045504	0.058559
423	KOdown	ENSMUSG00000020838	Slc6a4	-0.016741	-0.049824	-0.06473	0.048126	0.030275	0.055439
424	KOdown	ENSMUSG00000022041	Chrna2	-0.030493	-0.046075	-0.06051	0.036549	0.032579	0.061842
425	KOdown	ENSMUSG00000036306	Lzts1	-0.027814	-0.052608	-0.056925	0.041251	0.036233	0.056597
426	KOdown	ENSMUSG00000025905	Oprk1	-0.019414	-0.04941	-0.059682	0.029792	0.03178	0.063452
427	KOdown	ENSMUSG00000037610	Kcnmb2	-0.018801	-0.049251	-0.063323	0.03566	0.037409	0.056309
428	KOdown	ENSMUSG00000026322	Htr4	-0.026832	-0.057039	-0.054411	0.048411	0.045271	0.043917
429	KOdown	ENSMUSG00000043441	Gpr149	-0.024093	-0.053586	-0.059135	0.045763	0.040554	0.049748
430	KOdown	ENSMUSG00000044022	Pcdhb21	-0.033788	-0.035664	-0.062503	0.024546	0.025774	0.070414
431	KOdown	ENSMUSG00000045689	Pcdhb4	-0.032844	-0.036132	-0.061036	0.016114	0.030462	0.070145
432	KOdown	ENSMUSG00000032099	Pate4	0.005627	-0.058432	-0.061898	0.040264	0.031866	0.052174
433	KOdown	ENSMUSG00000000766	Oprm1	-0.00735	-0.054413	-0.064716	0.047721	0.039677	0.045126
434	KOdown	ENSMUSG00000033774	Npbwr1	-0.013979	-0.065498	-0.0493	0.060401	0.034984	0.042284
435	KOdown	ENSMUSG00000050558	Prokr2	-0.007282	-0.059446	-0.059116	0.057637	0.031476	0.046548
436	KOdown	ENSMUSG00000027107	Chrna1	-0.011926	-0.046414	-0.070471	0.056737	0.049	0.028937
437	KOdown	ENSMUSG00000041831	Sytl3	-0.01965	-0.054438	-0.06042	0.058315	0.047645	0.032946
438	KOdown	ENSMUSG00000066279	Chrna10	-0.001263	-0.057842	-0.060703	0.077397	0.021881	0.03857
439	KOdown	ENSMUSG00000045613	Chrm2	-0.008513	-0.037277	-0.078588	0.05156	0.027084	0.051062
440	KOdown	ENSMUSG00000024519	Cplx4	-0.009315	-0.055106	-0.05759	0.044101	0.020664	0.0626
441	KOdown	ENSMUSG00000048337	Npy4r	-0.005796	-0.053935	-0.054138	0.031821	0.015876	0.069735
442	KOdown	ENSMUSG00000040495	Chrm4	0.001498	-0.056252	-0.048958	0.045892	0.000367	0.068947
443	KOdown	ENSMUSG00000023945	Slc5a7	-0.021456	-0.062523	-0.037328	0.024222	0.065797	0.026768
444	KOdown	ENSMUSG00000015452	Ager	-0.022319	-0.053359	-0.056248	0.030452	0.055686	0.041112
445	KOdown	ENSMUSG00000032259	Drd2	-0.018499	-0.052929	-0.055623	0.026025	0.060876	0.035603
446	KOdown	ENSMUSG00000038257	Glra3	-0.013713	-0.055016	-0.057409	0.037359	0.05891	0.03049
447	KOdown	ENSMUSG00000044933	Sstr3	-0.015901	-0.051887	-0.059713	0.033895	0.0593	0.032744
448	KOdown	ENSMUSG00000089717	Olfr275	-0.037787	-0.049018	-0.051633	0.040453	0.064745	0.025351
449	KOdown	ENSMUSG00000027398	Il1b	-0.034314	-0.03161	-0.073003	0.064738	0.051449	0.021303
450	KOdown	ENSMUSG00000027524	Edn3	-0.044418	-0.024812	-0.074327	0.067936	0.047149	0.023747
451	KOdown	ENSMUSG00000027568	Ntsr1	-0.072416	-0.047682	-0.03981	0.061983	0.041327	0.04283
452	KOdown	ENSMUSG00000018595	Glra4	-0.051883	-0.041678	-0.059191	0.063147	0.04793	0.034382
453	KOdown	ENSMUSG00000049796	Crh	-0.050294	-0.040862	-0.059497	0.057063	0.053603	0.031348
454	KOdown	ENSMUSG00000034452	Slc24a1	-0.047472	-0.037735	-0.065449	0.056466	0.044501	0.041637
455	KOdown	ENSMUSG00000024401	Tnf	-0.059997	-0.046339	-0.048683	0.051098	0.051898	0.03893
456	KOdown	ENSMUSG00000058818	Pirb	-0.056831	-0.048735	-0.043948	0.044037	0.060662	0.031164
457	KOdown	ENSMUSG00000027071	P2rx3	-0.032434	-0.053062	-0.056041	0.071821	0.027116	0.046743
458	KOdown	ENSMUSG00000032303	Chrna3	-0.044395	-0.0542	-0.048825	0.067627	0.047783	0.030273
459	KOdown	ENSMUSG00000059602	Syn3	-0.046637	-0.055388	-0.04518	0.082269	0.035953	0.031289
460	KOdown	ENSMUSG00000063687	Pcdhb5	-0.057046	-0.027509	-0.068285	0.065122	0.031954	0.046214
461	KOdown	ENSMUSG00000024798	Htr7	-0.032643	-0.071569	-0.00504	0.002242	0.041532	0.053806
462	KOdown	ENSMUSG00000034520	Gjc1	-0.041586	-0.06218	-0.024898	0.01078	0.044076	0.059014
463	KOdown	ENSMUSG00000023942	Slc29a1	-0.013402	-0.075862	-0.015013	0.010055	0.051929	0.039538
464	KOdown	ENSMUSG00000045903	Npas4	-0.023198	-0.069082	-0.027353	0.015551	0.05392	0.0438
465	KOdown	ENSMUSG00000020178	Adora2a	0.017698	-0.041251	-0.053892	-0.025375	0.067639	0.029642
466	KOdown	ENSMUSG00000041479	Syt15	0.028869	-0.047631	-0.058129	-0.01108	0.064105	0.026859
467	KOdown	ENSMUSG00000024883	Rin1	-0.010009	-0.057993	-0.030769	-0.018243	0.062734	0.042438
468	KOdown	ENSMUSG00000020081	Tacr2	-0.002487	-0.046453	-0.053464	-0.012337	0.062072	0.043257
469	KOdown	ENSMUSG00000031491	Chrna6	0.004934	-0.045606	-0.06259	-0.002969	0.054938	0.046945
470	KOdown	ENSMUSG00000057280	Musk	0.003818	-0.052223	-0.043614	-0.022734	0.048835	0.05736
471	KOdown	ENSMUSG00000027470	Mylk2	-0.006879	-0.046896	-0.049377	-0.007483	0.07123	0.029778
472	KOdown	ENSMUSG00000033730	Egr3	-0.019246	-0.046625	-0.048448	-0.003404	0.069392	0.035101
473	KOdown	ENSMUSG00000074939	Chrm5	-0.015496	-0.050431	-0.051063	0.005308	0.066038	0.036426
474	KOdown	ENSMUSG00000038071	Npy6r	-0.019614	-0.051819	-0.034611	-0.003534	0.076044	0.021284
475	KOdown	ENSMUSG00000055170	Ifng	-0.000809	-0.048562	-0.051098	0.006557	0.074096	0.016517
476	KOdown	ENSMUSG00000021464	Ror2	-0.025086	-0.028776	-0.043623	-0.033891	0.072686	0.034033
477	KOdown	ENSMUSG00000016028	Celsr1	-0.022373	-0.036564	-0.03002	-0.047886	0.056346	0.054686
478	KOdown	ENSMUSG00000050824	Sstr5	-0.014565	-0.031933	-0.048805	-0.036807	0.054883	0.056035
479	KOdown	ENSMUSG00000068615	Gjd2	-0.039757	-0.04993	-0.01996	-0.025437	0.047964	0.062442
480	KOdown	ENSMUSG00000026842	Abl1	-0.047864	-0.013251	-0.069091	0.001717	0.048992	0.054152
481	KOdown	ENSMUSG00000023411	Nfatc4	-0.028303	-0.019757	-0.062146	-0.022374	0.056217	0.052367
482	KOdown	ENSMUSG00000062372	Otof	-0.037273	-0.023501	-0.057691	-0.018083	0.055033	0.055734
483	KOdown	ENSMUSG00000032714	Syde1	-0.046622	-0.027539	-0.055911	-0.000582	0.036865	0.070161
484	KOdown	ENSMUSG00000040287	Stac3	-0.039709	-0.031634	-0.050541	-0.013129	0.042335	0.06858
485	KOdown	ENSMUSG00000023192	Grm2	-0.065307	-0.027782	-0.054312	0.014688	0.04975	0.056158
486	KOdown	ENSMUSG00000026253	Chrng	-0.049902	-0.037814	-0.0556	0.017678	0.053894	0.052017
487	KOdown	ENSMUSG00000028747	Htr6	-0.0515	-0.032036	-0.058749	0.015743	0.058578	0.046464
488	KOdown	ENSMUSG00000042757	Tmem108	-0.061667	-0.032323	-0.053011	0.019071	0.061359	0.042426
489	KOdown	ENSMUSG00000029470	P2rx4	-0.070334	-0.029157	-0.042628	0.000112	0.057154	0.052645
490	KOdown	ENSMUSG00000062585	Cnr2	-0.057254	-0.037825	-0.053971	0.029819	0.03869	0.061981
491	KOdown	ENSMUSG00000027400	Pdyn	-0.018944	-0.054465	-0.045271	0.000863	0.048382	0.058649
492	KOdown	ENSMUSG00000053550	Shisa7	-0.027547	-0.057382	-0.03657	0.001341	0.058973	0.047669
493	KOdown	ENSMUSG00000021647	Cartpt	-0.0522	-0.041641	-0.04349	0.003121	0.050681	0.059887
494	KOdown	ENSMUSG00000043079	Synpo	-0.045	-0.041628	-0.050746	0.008546	0.053029	0.055913
495	KOdown	ENSMUSG00000027577	Chrna4	-0.036859	-0.046331	-0.045408	-0.000711	0.052702	0.057868
496	KOdown	ENSMUSG00000074006	Omp	-0.033783	-0.04918	-0.041938	-0.003344	0.049939	0.060481
497	KOdown	ENSMUSG00000045052	Prlhr	-0.04034	-0.043734	-0.045684	-0.0018	0.058537	0.05232
498	KOdown	ENSMUSG00000046159	Chrm3	-0.037471	-0.047744	-0.045315	0.00559	0.042951	0.065158
499	KOdown	ENSMUSG00000058420	Syt17	-0.037461	-0.033183	-0.059058	0.001448	0.060583	0.047536
500	KOdown	ENSMUSG00000059456	Ptk2b	-0.02961	-0.033637	-0.066006	0.009013	0.048496	0.056679
501	KOdown	ENSMUSG00000052336	Cx3cr1	-0.046429	-0.039125	-0.047457	0.002848	0.066706	0.041178
502	KOdown	ENSMUSG00000070687	Htr1d	-0.034203	-0.04778	-0.043055	0.007702	0.071844	0.029987
503	KOdown	ENSMUSG00000091091	Kcnmb3	-0.031463	-0.047318	-0.049585	0.008392	0.064713	0.040667
504	KOdown	ENSMUSG00000061878	Sphk1	-0.05732	-0.034178	-0.034801	-0.014252	0.069093	0.040736
505	KOdown	ENSMUSG00000030898	Cckbr	-0.016987	-0.053757	-0.044858	0.002728	0.034997	0.068789
506	KOdown	ENSMUSG00000032773	Chrm1	-0.001779	-0.052533	-0.054128	0.005681	0.033345	0.066442
507	KOdown	ENSMUSG00000043458	Pcdhb12	-0.007207	-0.048099	-0.056191	0.005016	0.032199	0.068678
508	KOdown	ENSMUSG00000036422	Pcdh8	1.6e-05	-0.045088	-0.053609	-0.002029	0.020783	0.075578
509	KOdown	ENSMUSG00000037428	Vgf	-0.015246	-0.039649	-0.057601	-0.009411	0.044898	0.063284
510	KOdown	ENSMUSG00000051678	Pcdhb6	0.01183	-0.037624	-0.067172	-0.007571	0.032156	0.065411
511	KOdown	ENSMUSG00000022705	Drd3	-0.03628	-0.031333	-0.032662	-0.017616	0.083039	0.011226
512	KOdown	ENSMUSG00000031098	Syt8	-0.032942	-0.032584	-0.034075	-0.006363	0.084607	0.002211
513	KOdown	ENSMUSG00000003476	Crhr2	-0.013962	-0.047937	-0.052686	0.028789	0.072964	0.010662
514	KOdown	ENSMUSG00000042632	Pla2g6	-0.001935	-0.048134	-0.045041	0.032349	0.07544	-0.008441
515	KOdown	ENSMUSG00000029503	P2rx2	-0.029062	-0.045042	-0.038737	0.045246	0.074892	-0.009618
516	KOdown	ENSMUSG00000028860	Sytl1	-0.033477	-0.03828	-0.049053	0.016422	0.077923	0.01282
517	KOdown	ENSMUSG00000039232	Stx11	-0.048626	-0.034254	-0.045343	0.038924	0.07605	0.000387
518	KOdown	ENSMUSG00000050164	Mchr1	-0.051698	-0.025877	-0.052661	0.024046	0.076443	0.010436
519	KOdown	ENSMUSG00000045875	Adra1a	-0.022398	-0.02619	-0.079238	0.025304	0.049951	0.043718
520	KOdown	ENSMUSG00000051242	Pcdhb9	-0.01587	-0.017944	-0.079681	0.014097	0.06286	0.026371
521	KOdown	ENSMUSG00000053004	Hrh1	-0.015529	-0.024683	-0.068428	0.01852	0.073879	0.00837
522	KOdown	ENSMUSG00000009376	Met	-0.021069	-0.066138	-0.025196	0.042441	0.004703	0.069004
523	KOdown	ENSMUSG00000021478	Drd1	-0.004043	-0.072952	-0.024298	0.020724	0.019876	0.064749
524	KOdown	ENSMUSG00000039942	Ptger4	-0.026695	-0.065766	-0.017911	0.011198	0.020354	0.071415
525	KOdown	ENSMUSG00000043313	Pcdhb19	0.008453	-0.065492	-0.024746	-0.001858	0.012981	0.07302
526	KOdown	ENSMUSG00000034987	Hrh2	0.019688	-0.077059	-0.021987	0.035392	0.003392	0.059101
527	KOdown	ENSMUSG00000020961	Ston2	-0.045335	-0.007289	-0.075626	0.019988	0.0251	0.06405
528	KOdown	ENSMUSG00000022878	Adipoq	-0.050373	-0.040143	-0.042149	0.040974	0.004492	0.076632
529	KOdown	ENSMUSG00000037014	Sstr4	-0.031653	-0.037275	-0.038638	0.026071	-0.009129	0.083732
530	KOdown	ENSMUSG00000039358	Drd5	-0.029163	-0.037551	-0.039137	0.052315	-0.020406	0.075957
531	KOdown	ENSMUSG00000035385	Ccl2	-0.033889	-0.030352	-0.041013	0.002735	0.000795	0.08646
532	KOdown	ENSMUSG00000027859	Ngf	-0.039847	-0.026971	-0.051323	0.010985	0.008255	0.082486
533	KOdown	ENSMUSG00000045657	Pcdhb10	-0.053384	-0.023455	-0.051385	0.011405	0.015295	0.07955
534	KOdown	ENSMUSG00000042644	Itpr3	-0.051778	-0.037471	-0.04009	0.004626	0.024452	0.078099
535	KOdown	ENSMUSG00000050511	Oprd1	-0.041629	-0.039238	-0.047962	0.011538	0.023768	0.076805
536	KOdown	ENSMUSG00000051486	Pcdhb11	-0.047376	-0.04034	-0.03734	0.015199	0.011749	0.081442
537	KOdown	ENSMUSG00000045876	Pcdhb8	-0.067005	-0.035948	-0.023508	0.011266	0.009138	0.081568
538	KOdown	ENSMUSG00000025496	Drd4	-0.051318	-0.028209	-0.010019	-0.023563	0.000199	0.085663
539	KOdown	ENSMUSG00000051331	Cacna1c	-0.039578	-0.04322	-0.029266	-0.014362	0.025706	0.078939
540	KOdown	ENSMUSG00000053310	Nrgn	-0.033449	-0.030657	-0.027453	-0.036069	0.020288	0.081586
541	KOdown	ENSMUSG00000021217	Tshz3	0.006439	-0.048556	-0.031857	-0.035043	0.025491	0.073948
542	KOdown	ENSMUSG00000022602	Arc	0.025575	-0.056637	-0.029487	-0.036546	0.030481	0.064516
543	KOdown	ENSMUSG00000026251	Chrnd	0.012421	-0.043049	-0.017355	-0.047525	0.008098	0.078114
544	KOdown	ENSMUSG00000027849	Syt6	0.056006	-0.078601	-0.001286	-0.005947	0.003358	0.049198
545	KOdown	ENSMUSG00000027792	Bche	0.016849	-0.081806	0.020321	0.025075	0.045205	-0.008616
546	KOdown	ENSMUSG00000039728	Slc6a5	0.045225	-0.075492	0.007455	-0.002215	0.053155	-0.009292
547	KOdown	ENSMUSG00000021708	Rasgrf2	0.092309	-0.053977	-0.045225	0.03646	0.036284	-0.021753
548	KOdown	ENSMUSG00000037434	Slc30a1	0.091374	-0.05771	-0.010573	-0.000338	0.043466	-0.030329
549	KOdown	ENSMUSG00000030093	Wnt7a	0.077115	-0.029479	-0.06353	-0.037023	0.047181	0.019773
550	KOdown	ENSMUSG00000036473	Tbc1d24	0.059101	-0.049649	-0.056691	-0.02018	0.052707	0.027555
551	KOdown	ENSMUSG00000032641	Gpr19	0.036527	-0.048452	-0.045349	-0.039459	0.04869	0.047345
552	KOdown	ENSMUSG00000019803	Nr2e1	0.007673	-0.076083	-0.013461	0.014372	0.062534	0.011691
553	KOdown	ENSMUSG00000062960	Kdr	0.032718	-0.080661	-0.025771	0.038315	0.047219	0.011333
554	KOdown	ENSMUSG00000036437	Npy1r	0.009131	-0.06403	-0.050353	0.015928	0.042752	0.05134
555	KOdown	ENSMUSG00000044120	Olfr683	0.027475	-0.060433	-0.06324	0.035599	0.047122	0.029933
556	KOdown	ENSMUSG00000051663	Pcdhb1	0.014458	-0.067176	-0.049542	0.034636	0.054781	0.025019
557	KOdown	ENSMUSG00000049583	Grm5	0.03843	-0.068441	-0.048062	0.017648	0.051985	0.025431
558	KOdown	ENSMUSG00000047139	Cd24a	0.020188	-0.042198	-0.062914	0.021442	0.070455	0.001299
559	KOdown	ENSMUSG00000028004	Npy2r	0.05511	-0.067664	-0.054868	0.028007	0.025956	0.040193
560	KOdown	ENSMUSG00000073591	Pcdhb22	0.065454	-0.074128	-0.044064	0.027083	0.026817	0.03051
561	KOdown	ENSMUSG00000068696	Gpr88	0.071218	-0.070853	-0.037939	-0.000357	0.022185	0.042262
562	KOdown	ENSMUSG00000023826	Park2	0.00141	-0.030833	-0.074595	0.050698	-0.000966	0.06421
563	KOdown	ENSMUSG00000020155	Kcnmb1	-0.007973	-0.003442	-0.090634	0.0659	0.003042	0.041409
564	KOdown	ENSMUSG00000029468	P2rx7	-0.001704	-0.002736	-0.088977	0.05958	-0.004429	0.04754
565	KOdown	ENSMUSG00000032487	Ptgs2	0.040826	-0.032387	-0.048404	0.010358	-0.028135	0.074592
566	KOdown	ENSMUSG00000073804	Nps	0.000868	-0.038871	-0.040858	0.026201	-0.022182	0.081119
567	KOdown	ENSMUSG00000075167	Olfr1101	0.031813	-0.048088	-0.050707	0.063502	-0.024806	0.057236
568	KOdown	ENSMUSG00000024256	Adcyap1	0.045968	-0.010747	-0.0642	0.085467	-0.04027	0.022873
569	KOdown	ENSMUSG00000059003	Grin2a	0.044538	-0.014386	-0.018035	0.06092	-0.069401	0.032584
570	KOdown	ENSMUSG00000018012	Rac3	-0.073365	0.028747	-0.024024	0.077697	0.024275	-0.043431
571	KOdown	ENSMUSG00000015605	Srf	-0.100126	0.052486	-0.005588	0.044039	-0.00532	-0.01438
572	KOdown	ENSMUSG00000063260	Syt10	-0.06404	0.05932	-0.0186	0.04918	-0.010381	-0.029721
573	KOdown	ENSMUSG00000030685	Kctd13	-0.134007	0.014616	0.012043	0.017483	0.003885	0.038318
574	KOdown	ENSMUSG00000041115	Iqsec2	-0.117582	0.044559	0.015054	0.011576	-0.005797	0.008931
575	KOdown	ENSMUSG00000079055	Slc8a3	-0.115134	0.029397	0.002346	-0.020246	0.043625	0.006494
576	KOdown	ENSMUSG00000050556	Kcnb1	-0.065733	0.036138	-0.047573	-0.005418	-0.011283	0.061304
577	KOdown	ENSMUSG00000001985	Grik3	-0.017194	-0.066172	0.061066	-0.003066	-0.005731	0.030788
578	KOdown	ENSMUSG00000064177	Ghrl	0.00176	-0.05378	0.054572	0.036665	-0.043597	0.023265
579	KOdown	ENSMUSG00000067242	Lgi1	-0.00087	-0.060564	0.066605	0.015378	-0.024185	0.015986

## Sheet: key_gene_heatmap
Ensembl	Symbol	KO1.ssv2	KO2.ssv2	KO3.ssv2	WT1.ssv2	WT2.ssv2	WT3.ssv2
ENSMUSG00000004040	Stat3	-0.033552	-0.004111	-0.077097	0.055036	0.055129	0.01224
ENSMUST00000161839	Hes1	-0.038909	-0.015835	-0.040309	-0.027721	0.0299	0.075447
ENSMUSG00000029249	Rest	-0.002878	-0.012834	-0.081688	-0.00795	0.03478	0.055594
ENSMUSG00000020524	Gria1	0.03424	0.029349	0.042665	-0.025158	-0.038847	-0.034446
ENSMUSG00000033981	Gria2	0.028471	0.042454	0.016195	0.037805	-0.051457	-0.043735
