# Supplementary material for: Ablation of STAT3 in Purkinje cells reorganizes cerebellar synaptic plasticity in long-term fear memory network
Source: eLife. 2021 Jan 18;10:e63291. doi: 10.7554/eLife.63291 (PMC7813544; doi:10.7554/eLife.63291)
Supplement: Figure 2—source data 3. [file elife-63291-fig2-data3.xlsx]

## Sheet: gProfiler
#	signf	p-value	T	Q	Q&T	Q&T/Q	Q&T/T	term ID	t type	t group	t name	t depth	Q&T list
1	!	5.71e-29	6445	243	169	0.695	0.026	GO:0044444	CC	1	cytoplasmic part	1	ENSMUSG00000000088,ENSMUSG00000000214,ENSMUSG00000000708,ENSMUSG00000001018,ENSMUSG00000001785,ENSMUSG00000001924,ENSMUSG00000002010,ENSMUSG00000002733,ENSMUSG00000003363,ENSMUSG00000003662,ENSMUSG00000005881,ENSMUSG00000006273,ENSMUSG00000006276,ENSMUSG00000006932,ENSMUSG00000008348,ENSMUSG00000011179,ENSMUSG00000013622,ENSMUSG00000014769,ENSMUSG00000014905,ENSMUSG00000015090,ENSMUSG00000017390,…
1	!	4.94e-25	9543	243	200	0.823	0.021	GO:0043227	CC	1	membrane-bounded organelle	1	ENSMUSG00000000088,ENSMUSG00000000214,ENSMUSG00000000708,ENSMUSG00000001018,ENSMUSG00000001785,ENSMUSG00000001924,ENSMUSG00000002010,ENSMUSG00000002679,ENSMUSG00000002733,ENSMUSG00000003363,ENSMUSG00000004032,ENSMUSG00000005881,ENSMUSG00000006134,ENSMUSG00000006273,ENSMUSG00000006373,ENSMUSG00000006932,ENSMUSG00000007836,ENSMUSG00000007950,ENSMUSG00000008348,ENSMUSG00000013622,ENSMUSG00000014769,…
1	!	1.73e-22	10288	243	204	0.84	0.02	GO:0043226	CC	1	organelle	1	ENSMUSG00000000088,ENSMUSG00000000214,ENSMUSG00000000708,ENSMUSG00000001018,ENSMUSG00000001785,ENSMUSG00000001924,ENSMUSG00000002010,ENSMUSG00000002679,ENSMUSG00000002733,ENSMUSG00000003363,ENSMUSG00000003662,ENSMUSG00000004032,ENSMUSG00000005881,ENSMUSG00000006134,ENSMUSG00000006273,ENSMUSG00000006373,ENSMUSG00000006932,ENSMUSG00000007836,ENSMUSG00000007950,ENSMUSG00000008348,ENSMUSG00000013622,…
1	!	1.81e-22	8024	243	179	0.737	0.022	GO:0005737	CC	1	cytoplasm	1	ENSMUSG00000000088,ENSMUSG00000000214,ENSMUSG00000000708,ENSMUSG00000001018,ENSMUSG00000001785,ENSMUSG00000001924,ENSMUSG00000002010,ENSMUSG00000002733,ENSMUSG00000003363,ENSMUSG00000003662,ENSMUSG00000004032,ENSMUSG00000005881,ENSMUSG00000006273,ENSMUSG00000006276,ENSMUSG00000006932,ENSMUSG00000008348,ENSMUSG00000011179,ENSMUSG00000013622,ENSMUSG00000014769,ENSMUSG00000014905,ENSMUSG00000015090,…
1	!	1.51e-20	10776	243	206	0.848	0.019	GO:0005622	CC	1	intracellular	1	ENSMUSG00000000088,ENSMUSG00000000214,ENSMUSG00000000708,ENSMUSG00000001018,ENSMUSG00000001785,ENSMUSG00000001924,ENSMUSG00000002010,ENSMUSG00000002679,ENSMUSG00000002733,ENSMUSG00000003363,ENSMUSG00000003662,ENSMUSG00000004032,ENSMUSG00000005881,ENSMUSG00000006273,ENSMUSG00000006276,ENSMUSG00000006932,ENSMUSG00000007836,ENSMUSG00000008348,ENSMUSG00000011179,ENSMUSG00000013622,ENSMUSG00000014769,…
1	!	2.4e-20	2398	243	90	0.37	0.038	GO:0070062	CC	1	extracellular exosome	1	ENSMUSG00000000088,ENSMUSG00000001924,ENSMUSG00000003363,ENSMUSG00000004032,ENSMUSG00000006134,ENSMUSG00000006273,ENSMUSG00000006373,ENSMUSG00000006932,ENSMUSG00000007950,ENSMUSG00000008348,ENSMUSG00000014769,ENSMUSG00000014905,ENSMUSG00000015090,ENSMUSG00000017390,ENSMUSG00000019478,ENSMUSG00000020149,ENSMUSG00000020402,ENSMUSG00000020720,ENSMUSG00000021048,ENSMUSG00000021877,ENSMUSG00000022336,…
1	!	3.74e-20	2413	243	90	0.37	0.037	GO:1903561	CC	1	extracellular vesicle	1	ENSMUSG00000000088,ENSMUSG00000001924,ENSMUSG00000003363,ENSMUSG00000004032,ENSMUSG00000006134,ENSMUSG00000006273,ENSMUSG00000006373,ENSMUSG00000006932,ENSMUSG00000007950,ENSMUSG00000008348,ENSMUSG00000014769,ENSMUSG00000014905,ENSMUSG00000015090,ENSMUSG00000017390,ENSMUSG00000019478,ENSMUSG00000020149,ENSMUSG00000020402,ENSMUSG00000020720,ENSMUSG00000021048,ENSMUSG00000021877,ENSMUSG00000022336,…
1	!	4.59e-20	2420	243	90	0.37	0.037	GO:0043230	CC	1	extracellular organelle	1	ENSMUSG00000000088,ENSMUSG00000001924,ENSMUSG00000003363,ENSMUSG00000004032,ENSMUSG00000006134,ENSMUSG00000006273,ENSMUSG00000006373,ENSMUSG00000006932,ENSMUSG00000007950,ENSMUSG00000008348,ENSMUSG00000014769,ENSMUSG00000014905,ENSMUSG00000015090,ENSMUSG00000017390,ENSMUSG00000019478,ENSMUSG00000020149,ENSMUSG00000020402,ENSMUSG00000020720,ENSMUSG00000021048,ENSMUSG00000021877,ENSMUSG00000022336,…
1	!	6.87e-20	10674	243	204	0.84	0.019	GO:0044424	CC	1	intracellular part	1	ENSMUSG00000000088,ENSMUSG00000000214,ENSMUSG00000000708,ENSMUSG00000001018,ENSMUSG00000001785,ENSMUSG00000001924,ENSMUSG00000002010,ENSMUSG00000002679,ENSMUSG00000002733,ENSMUSG00000003363,ENSMUSG00000003662,ENSMUSG00000004032,ENSMUSG00000005881,ENSMUSG00000006273,ENSMUSG00000006276,ENSMUSG00000006932,ENSMUSG00000007836,ENSMUSG00000008348,ENSMUSG00000011179,ENSMUSG00000013622,ENSMUSG00000014769,…
1	!	1.05e-19	9191	243	188	0.774	0.02	GO:0043229	CC	1	intracellular organelle	1	ENSMUSG00000000088,ENSMUSG00000000214,ENSMUSG00000000708,ENSMUSG00000001018,ENSMUSG00000001785,ENSMUSG00000001924,ENSMUSG00000002010,ENSMUSG00000002679,ENSMUSG00000002733,ENSMUSG00000003363,ENSMUSG00000003662,ENSMUSG00000004032,ENSMUSG00000005881,ENSMUSG00000006273,ENSMUSG00000006932,ENSMUSG00000007836,ENSMUSG00000008348,ENSMUSG00000013622,ENSMUSG00000014769,ENSMUSG00000014905,ENSMUSG00000015090,…
1	!	1.67e-18	3255	243	103	0.424	0.032	GO:0031982	CC	1	vesicle	1	ENSMUSG00000000088,ENSMUSG00000000214,ENSMUSG00000001018,ENSMUSG00000001924,ENSMUSG00000003363,ENSMUSG00000004032,ENSMUSG00000006134,ENSMUSG00000006273,ENSMUSG00000006373,ENSMUSG00000006932,ENSMUSG00000007950,ENSMUSG00000008348,ENSMUSG00000014769,ENSMUSG00000014905,ENSMUSG00000015090,ENSMUSG00000017390,ENSMUSG00000019478,ENSMUSG00000020149,ENSMUSG00000020402,ENSMUSG00000020720,ENSMUSG00000021038,…
1	!	5.43e-16	7972	243	167	0.687	0.021	GO:0043231	CC	1	intracellular membrane-bounded organelle	1	ENSMUSG00000000088,ENSMUSG00000000214,ENSMUSG00000000708,ENSMUSG00000001785,ENSMUSG00000001924,ENSMUSG00000002010,ENSMUSG00000002679,ENSMUSG00000002733,ENSMUSG00000003363,ENSMUSG00000004032,ENSMUSG00000005881,ENSMUSG00000006273,ENSMUSG00000006932,ENSMUSG00000007836,ENSMUSG00000008348,ENSMUSG00000013622,ENSMUSG00000014769,ENSMUSG00000014905,ENSMUSG00000015090,ENSMUSG00000016308,ENSMUSG00000017390,…
1	!	2.79e-15	1486	243	63	0.259	0.042	GO:0005739	CC	1	mitochondrion	1	ENSMUSG00000000088,ENSMUSG00000001924,ENSMUSG00000002010,ENSMUSG00000017390,ENSMUSG00000018322,ENSMUSG00000018677,ENSMUSG00000019831,ENSMUSG00000020038,ENSMUSG00000020163,ENSMUSG00000020402,ENSMUSG00000020477,ENSMUSG00000021048,ENSMUSG00000021339,ENSMUSG00000021417,ENSMUSG00000021606,ENSMUSG00000021794,ENSMUSG00000022200,ENSMUSG00000022450,ENSMUSG00000022463,ENSMUSG00000022956,ENSMUSG00000023020,…
1	!	3.54e-15	12601	243	215	0.885	0.017	GO:0044464	CC	1	cell part	1	ENSMUSG00000000088,ENSMUSG00000000214,ENSMUSG00000000708,ENSMUSG00000001018,ENSMUSG00000001785,ENSMUSG00000001924,ENSMUSG00000002010,ENSMUSG00000002679,ENSMUSG00000002733,ENSMUSG00000003363,ENSMUSG00000003662,ENSMUSG00000004032,ENSMUSG00000005881,ENSMUSG00000006273,ENSMUSG00000006276,ENSMUSG00000006373,ENSMUSG00000006932,ENSMUSG00000007836,ENSMUSG00000008348,ENSMUSG00000011179,ENSMUSG00000013622,…
1	!	3.54e-15	12601	243	215	0.885	0.017	GO:0005623	CC	1	cell	1	ENSMUSG00000000088,ENSMUSG00000000214,ENSMUSG00000000708,ENSMUSG00000001018,ENSMUSG00000001785,ENSMUSG00000001924,ENSMUSG00000002010,ENSMUSG00000002679,ENSMUSG00000002733,ENSMUSG00000003363,ENSMUSG00000003662,ENSMUSG00000004032,ENSMUSG00000005881,ENSMUSG00000006273,ENSMUSG00000006276,ENSMUSG00000006373,ENSMUSG00000006932,ENSMUSG00000007836,ENSMUSG00000008348,ENSMUSG00000011179,ENSMUSG00000013622,…
1	!	1.26e-14	6116	243	140	0.576	0.023	GO:0044422	CC	1	organelle part	1	ENSMUSG00000000088,ENSMUSG00000000214,ENSMUSG00000000708,ENSMUSG00000001785,ENSMUSG00000001924,ENSMUSG00000002010,ENSMUSG00000002679,ENSMUSG00000003363,ENSMUSG00000003662,ENSMUSG00000004032,ENSMUSG00000006273,ENSMUSG00000006932,ENSMUSG00000007836,ENSMUSG00000008348,ENSMUSG00000013622,ENSMUSG00000016308,ENSMUSG00000018322,ENSMUSG00000018677,ENSMUSG00000019478,ENSMUSG00000019831,ENSMUSG00000020038,…
1	!	1.78e-14	5923	243	137	0.564	0.023	GO:0044446	CC	1	intracellular organelle part	1	ENSMUSG00000000088,ENSMUSG00000000214,ENSMUSG00000000708,ENSMUSG00000001785,ENSMUSG00000001924,ENSMUSG00000002010,ENSMUSG00000002679,ENSMUSG00000003363,ENSMUSG00000003662,ENSMUSG00000006273,ENSMUSG00000006932,ENSMUSG00000007836,ENSMUSG00000008348,ENSMUSG00000013622,ENSMUSG00000016308,ENSMUSG00000018322,ENSMUSG00000018677,ENSMUSG00000019478,ENSMUSG00000019831,ENSMUSG00000020038,ENSMUSG00000020137,…
1	!	6.7e-12	3388	243	93	0.383	0.027	GO:0005615	CC	1	extracellular space	1	ENSMUSG00000000088,ENSMUSG00000001924,ENSMUSG00000003363,ENSMUSG00000004032,ENSMUSG00000006134,ENSMUSG00000006273,ENSMUSG00000006373,ENSMUSG00000006932,ENSMUSG00000007950,ENSMUSG00000008348,ENSMUSG00000014769,ENSMUSG00000014905,ENSMUSG00000015090,ENSMUSG00000017390,ENSMUSG00000017754,ENSMUSG00000019478,ENSMUSG00000020149,ENSMUSG00000020402,ENSMUSG00000020720,ENSMUSG00000021048,ENSMUSG00000021877,…
1	!	3.52e-11	3539	243	94	0.387	0.027	GO:0044421	CC	1	extracellular region part	1	ENSMUSG00000000088,ENSMUSG00000001924,ENSMUSG00000003363,ENSMUSG00000004032,ENSMUSG00000006134,ENSMUSG00000006273,ENSMUSG00000006373,ENSMUSG00000006932,ENSMUSG00000007950,ENSMUSG00000008348,ENSMUSG00000014769,ENSMUSG00000014905,ENSMUSG00000015090,ENSMUSG00000017390,ENSMUSG00000017754,ENSMUSG00000019478,ENSMUSG00000020149,ENSMUSG00000020402,ENSMUSG00000020720,ENSMUSG00000021048,ENSMUSG00000021877,…
1	!	1.07e-10	479	243	31	0.128	0.065	GO:0005740	CC	1	mitochondrial envelope	1	ENSMUSG00000000088,ENSMUSG00000018322,ENSMUSG00000018677,ENSMUSG00000019831,ENSMUSG00000020163,ENSMUSG00000020402,ENSMUSG00000021339,ENSMUSG00000021606,ENSMUSG00000021794,ENSMUSG00000022450,ENSMUSG00000022956,ENSMUSG00000023861,ENSMUSG00000024248,ENSMUSG00000024978,ENSMUSG00000025781,ENSMUSG00000027010,ENSMUSG00000028648,ENSMUSG00000028756,ENSMUSG00000030647,ENSMUSG00000031198,ENSMUSG00000031672,…
1	!	2.62e-10	636	243	35	0.144	0.055	GO:0044429	CC	1	mitochondrial part	1	ENSMUSG00000000088,ENSMUSG00000018322,ENSMUSG00000018677,ENSMUSG00000019831,ENSMUSG00000020163,ENSMUSG00000020402,ENSMUSG00000020477,ENSMUSG00000021339,ENSMUSG00000021606,ENSMUSG00000021794,ENSMUSG00000022450,ENSMUSG00000022956,ENSMUSG00000023861,ENSMUSG00000024248,ENSMUSG00000024829,ENSMUSG00000024978,ENSMUSG00000025781,ENSMUSG00000025825,ENSMUSG00000027010,ENSMUSG00000028648,ENSMUSG00000028756,…
1	!	2.94e-10	3661	243	94	0.387	0.026	GO:0005576	CC	1	extracellular region	1	ENSMUSG00000000088,ENSMUSG00000001924,ENSMUSG00000003363,ENSMUSG00000004032,ENSMUSG00000006134,ENSMUSG00000006273,ENSMUSG00000006373,ENSMUSG00000006932,ENSMUSG00000007950,ENSMUSG00000008348,ENSMUSG00000014769,ENSMUSG00000014905,ENSMUSG00000015090,ENSMUSG00000017390,ENSMUSG00000017754,ENSMUSG00000019478,ENSMUSG00000020149,ENSMUSG00000020402,ENSMUSG00000020720,ENSMUSG00000021048,ENSMUSG00000021877,…
1	!	4.31e-10	1366	243	52	0.214	0.038	GO:0031090	CC	1	organelle membrane	1	ENSMUSG00000000088,ENSMUSG00000000214,ENSMUSG00000001924,ENSMUSG00000006273,ENSMUSG00000013622,ENSMUSG00000018322,ENSMUSG00000018677,ENSMUSG00000019478,ENSMUSG00000019831,ENSMUSG00000020149,ENSMUSG00000020163,ENSMUSG00000020290,ENSMUSG00000020402,ENSMUSG00000021339,ENSMUSG00000021606,ENSMUSG00000021794,ENSMUSG00000022450,ENSMUSG00000022956,ENSMUSG00000023861,ENSMUSG00000024248,ENSMUSG00000024870,…
1	!	4.49e-10	439	243	29	0.119	0.066	GO:0031966	CC	1	mitochondrial membrane	1	ENSMUSG00000000088,ENSMUSG00000018322,ENSMUSG00000018677,ENSMUSG00000019831,ENSMUSG00000020163,ENSMUSG00000020402,ENSMUSG00000021339,ENSMUSG00000021606,ENSMUSG00000021794,ENSMUSG00000022450,ENSMUSG00000022956,ENSMUSG00000023861,ENSMUSG00000024248,ENSMUSG00000024978,ENSMUSG00000025781,ENSMUSG00000027010,ENSMUSG00000028648,ENSMUSG00000028756,ENSMUSG00000030647,ENSMUSG00000031198,ENSMUSG00000031672,…
1	!	1.94e-09	338	243	25	0.103	0.074	GO:0005743	CC	1	mitochondrial inner membrane	1	ENSMUSG00000000088,ENSMUSG00000018677,ENSMUSG00000020163,ENSMUSG00000020402,ENSMUSG00000021339,ENSMUSG00000021606,ENSMUSG00000021794,ENSMUSG00000022450,ENSMUSG00000022956,ENSMUSG00000023861,ENSMUSG00000024248,ENSMUSG00000024978,ENSMUSG00000025781,ENSMUSG00000027010,ENSMUSG00000028648,ENSMUSG00000028756,ENSMUSG00000030647,ENSMUSG00000031672,ENSMUSG00000035885,ENSMUSG00000038717,ENSMUSG00000044894,…
1	!	2.52e-09	15585	260	239	0.919	0.015	TF:M04662_1	tf	1	Factor: FOXN4; motif: NNWANNCGWMCGCGTCNNNNMT; match class: 1	1	ENSMUSG00000000088,ENSMUSG00000000708,ENSMUSG00000001018,ENSMUSG00000001785,ENSMUSG00000001924,ENSMUSG00000002010,ENSMUSG00000002679,ENSMUSG00000002733,ENSMUSG00000003363,ENSMUSG00000003662,ENSMUSG00000004032,ENSMUSG00000005610,ENSMUSG00000005873,ENSMUSG00000005881,ENSMUSG00000006134,ENSMUSG00000006273,ENSMUSG00000006276,ENSMUSG00000006373,ENSMUSG00000006932,ENSMUSG00000007836,ENSMUSG00000007950,…
1	!	1.04e-08	142	148	18	0.122	0.127	KEGG:05012	keg	1	Parkinson's disease	1	ENSMUSG00000000088,ENSMUSG00000000214,ENSMUSG00000001924,ENSMUSG00000020163,ENSMUSG00000020402,ENSMUSG00000021606,ENSMUSG00000022450,ENSMUSG00000022956,ENSMUSG00000024248,ENSMUSG00000025781,ENSMUSG00000028648,ENSMUSG00000028756,ENSMUSG00000030647,ENSMUSG00000035885,ENSMUSG00000041697,ENSMUSG00000044894,ENSMUSG00000059534,ENSMUSG00000059734
1	!	1.09e-08	16562	260	246	0.946	0.015	TF:M00716_0	tf	1	Factor: ZF5; motif: GSGCGCGR; match class: 0	1	ENSMUSG00000000088,ENSMUSG00000000708,ENSMUSG00000001018,ENSMUSG00000001785,ENSMUSG00000001924,ENSMUSG00000002010,ENSMUSG00000002679,ENSMUSG00000002733,ENSMUSG00000003363,ENSMUSG00000003662,ENSMUSG00000004032,ENSMUSG00000005610,ENSMUSG00000005873,ENSMUSG00000005881,ENSMUSG00000006134,ENSMUSG00000006273,ENSMUSG00000006276,ENSMUSG00000006373,ENSMUSG00000006932,ENSMUSG00000007836,ENSMUSG00000007950,…
1	!	1.51e-08	371	243	25	0.103	0.067	GO:0019866	CC	1	organelle inner membrane	1	ENSMUSG00000000088,ENSMUSG00000018677,ENSMUSG00000020163,ENSMUSG00000020402,ENSMUSG00000021339,ENSMUSG00000021606,ENSMUSG00000021794,ENSMUSG00000022450,ENSMUSG00000022956,ENSMUSG00000023861,ENSMUSG00000024248,ENSMUSG00000024978,ENSMUSG00000025781,ENSMUSG00000027010,ENSMUSG00000028648,ENSMUSG00000028756,ENSMUSG00000030647,ENSMUSG00000031672,ENSMUSG00000035885,ENSMUSG00000038717,ENSMUSG00000044894,…
1	!	1.81e-08	13836	260	221	0.85	0.016	TF:M00716_1	tf	1	Factor: ZF5; motif: GSGCGCGR; match class: 1	1	ENSMUSG00000000088,ENSMUSG00000000708,ENSMUSG00000001018,ENSMUSG00000001785,ENSMUSG00000001924,ENSMUSG00000002010,ENSMUSG00000002679,ENSMUSG00000002733,ENSMUSG00000003363,ENSMUSG00000003662,ENSMUSG00000004032,ENSMUSG00000005610,ENSMUSG00000005873,ENSMUSG00000006134,ENSMUSG00000006273,ENSMUSG00000006276,ENSMUSG00000006373,ENSMUSG00000006932,ENSMUSG00000007836,ENSMUSG00000007950,ENSMUSG00000008140,…
1	!	5.64e-08	2333	260	67	0.258	0.029	TF:M02102_0	tf	1	Factor: NRF-1; motif: YGCGCMTGCGC; match class: 0	1	ENSMUSG00000001785,ENSMUSG00000003363,ENSMUSG00000004032,ENSMUSG00000006134,ENSMUSG00000006273,ENSMUSG00000006932,ENSMUSG00000008140,ENSMUSG00000011179,ENSMUSG00000016344,ENSMUSG00000020038,ENSMUSG00000020149,ENSMUSG00000020585,ENSMUSG00000021048,ENSMUSG00000021339,ENSMUSG00000021606,ENSMUSG00000021775,ENSMUSG00000021877,ENSMUSG00000022450,ENSMUSG00000022463,ENSMUSG00000022517,ENSMUSG00000022956,…
1	!	8.39e-08	15559	260	236	0.908	0.015	TF:M01240_1	tf	1	Factor: BEN; motif: CAGCGRNV; match class: 1	1	ENSMUSG00000000088,ENSMUSG00000000214,ENSMUSG00000000708,ENSMUSG00000001018,ENSMUSG00000001785,ENSMUSG00000001924,ENSMUSG00000002010,ENSMUSG00000002679,ENSMUSG00000002733,ENSMUSG00000003363,ENSMUSG00000003662,ENSMUSG00000004032,ENSMUSG00000005610,ENSMUSG00000005873,ENSMUSG00000005881,ENSMUSG00000006134,ENSMUSG00000006273,ENSMUSG00000006276,ENSMUSG00000006373,ENSMUSG00000006932,ENSMUSG00000007836,…
1	!	9.07e-08	13115	260	212	0.815	0.016	TF:M00025_0	tf	1	Factor: Elk-1; motif: NNNNCCGGAARTNN; match class: 0	1	ENSMUSG00000000214,ENSMUSG00000000708,ENSMUSG00000001785,ENSMUSG00000002010,ENSMUSG00000002679,ENSMUSG00000002733,ENSMUSG00000003363,ENSMUSG00000003662,ENSMUSG00000004032,ENSMUSG00000005610,ENSMUSG00000005873,ENSMUSG00000005881,ENSMUSG00000006134,ENSMUSG00000006273,ENSMUSG00000006373,ENSMUSG00000006932,ENSMUSG00000007836,ENSMUSG00000007950,ENSMUSG00000008348,ENSMUSG00000011179,ENSMUSG00000012848,…
1	!	9.99e-08	13802	260	219	0.842	0.016	TF:M00333_1	tf	1	Factor: ZF5; motif: NRNGNGCGCGCWN; match class: 1	1	ENSMUSG00000000088,ENSMUSG00000000708,ENSMUSG00000001785,ENSMUSG00000001924,ENSMUSG00000002010,ENSMUSG00000002679,ENSMUSG00000002733,ENSMUSG00000003662,ENSMUSG00000005610,ENSMUSG00000005873,ENSMUSG00000005881,ENSMUSG00000006134,ENSMUSG00000006273,ENSMUSG00000006276,ENSMUSG00000006373,ENSMUSG00000006932,ENSMUSG00000007836,ENSMUSG00000007950,ENSMUSG00000008140,ENSMUSG00000008348,ENSMUSG00000011179,…
1	!	1.68e-07	7508	243	142	0.584	0.019	GO:0044237	BP	1	cellular metabolic process	1	ENSMUSG00000000088,ENSMUSG00000000214,ENSMUSG00000000708,ENSMUSG00000001018,ENSMUSG00000001785,ENSMUSG00000001924,ENSMUSG00000002010,ENSMUSG00000002679,ENSMUSG00000003363,ENSMUSG00000003662,ENSMUSG00000004032,ENSMUSG00000006932,ENSMUSG00000007836,ENSMUSG00000011179,ENSMUSG00000013622,ENSMUSG00000014905,ENSMUSG00000015090,ENSMUSG00000016308,ENSMUSG00000017390,ENSMUSG00000017754,ENSMUSG00000020038,…
1	!	1.89e-07	17754	260	253	0.973	0.014	TF:M01981_0	tf	1	Factor: ELK-1; motif: ACCGGAWRTN; match class: 0	1	ENSMUSG00000000214,ENSMUSG00000000708,ENSMUSG00000001785,ENSMUSG00000001924,ENSMUSG00000002010,ENSMUSG00000002679,ENSMUSG00000002733,ENSMUSG00000003363,ENSMUSG00000003662,ENSMUSG00000004032,ENSMUSG00000005610,ENSMUSG00000005873,ENSMUSG00000005881,ENSMUSG00000006134,ENSMUSG00000006273,ENSMUSG00000006276,ENSMUSG00000006373,ENSMUSG00000006932,ENSMUSG00000007836,ENSMUSG00000007950,ENSMUSG00000008140,…
1	!	2.02e-07	18065	260	255	0.981	0.014	TF:M04662_0	tf	1	Factor: FOXN4; motif: NNWANNCGWMCGCGTCNNNNMT; match class: 0	1	ENSMUSG00000000088,ENSMUSG00000000708,ENSMUSG00000001018,ENSMUSG00000001785,ENSMUSG00000001924,ENSMUSG00000002010,ENSMUSG00000002679,ENSMUSG00000002733,ENSMUSG00000003363,ENSMUSG00000003662,ENSMUSG00000004032,ENSMUSG00000005610,ENSMUSG00000005873,ENSMUSG00000005881,ENSMUSG00000006134,ENSMUSG00000006273,ENSMUSG00000006276,ENSMUSG00000006373,ENSMUSG00000006932,ENSMUSG00000007836,ENSMUSG00000007950,…
1	!	2.05e-07	11290	260	191	0.735	0.017	TF:M00803_0	tf	1	Factor: E2F; motif: GGCGSG; match class: 0	1	ENSMUSG00000000088,ENSMUSG00000000708,ENSMUSG00000001785,ENSMUSG00000001924,ENSMUSG00000002010,ENSMUSG00000002733,ENSMUSG00000003363,ENSMUSG00000003662,ENSMUSG00000004032,ENSMUSG00000005610,ENSMUSG00000005873,ENSMUSG00000005881,ENSMUSG00000006134,ENSMUSG00000006276,ENSMUSG00000006373,ENSMUSG00000006932,ENSMUSG00000007836,ENSMUSG00000007950,ENSMUSG00000008140,ENSMUSG00000008348,ENSMUSG00000011179,…
1	!	2.6e-07	133	148	16	0.108	0.12	KEGG:00190	keg	1	Oxidative phosphorylation	1	ENSMUSG00000000088,ENSMUSG00000006273,ENSMUSG00000020163,ENSMUSG00000021606,ENSMUSG00000022450,ENSMUSG00000022956,ENSMUSG00000024248,ENSMUSG00000025781,ENSMUSG00000028648,ENSMUSG00000030647,ENSMUSG00000035885,ENSMUSG00000038717,ENSMUSG00000041697,ENSMUSG00000044894,ENSMUSG00000059534,ENSMUSG00000059734
1	!	2.77e-07	496	243	27	0.111	0.054	GO:0098796	CC	1	membrane protein complex	1	ENSMUSG00000000088,ENSMUSG00000006276,ENSMUSG00000006932,ENSMUSG00000020952,ENSMUSG00000021606,ENSMUSG00000021917,ENSMUSG00000022450,ENSMUSG00000022463,ENSMUSG00000022956,ENSMUSG00000024248,ENSMUSG00000025739,ENSMUSG00000025781,ENSMUSG00000027423,ENSMUSG00000028552,ENSMUSG00000028648,ENSMUSG00000028756,ENSMUSG00000030327,ENSMUSG00000030647,ENSMUSG00000030654,ENSMUSG00000031696,ENSMUSG00000035885,…
1	!	4.11e-07	4072	243	93	0.383	0.023	GO:0032991	CC	1	macromolecular complex	1	ENSMUSG00000000088,ENSMUSG00000000708,ENSMUSG00000001018,ENSMUSG00000002679,ENSMUSG00000003662,ENSMUSG00000006276,ENSMUSG00000006932,ENSMUSG00000014769,ENSMUSG00000016308,ENSMUSG00000019831,ENSMUSG00000020290,ENSMUSG00000020477,ENSMUSG00000020720,ENSMUSG00000020948,ENSMUSG00000020952,ENSMUSG00000021076,ENSMUSG00000021606,ENSMUSG00000021917,ENSMUSG00000022105,ENSMUSG00000022336,ENSMUSG00000022450,…
1	!	4.52e-07	16642	260	244	0.938	0.015	TF:M00333_0	tf	1	Factor: ZF5; motif: NRNGNGCGCGCWN; match class: 0	1	ENSMUSG00000000088,ENSMUSG00000000708,ENSMUSG00000001018,ENSMUSG00000001785,ENSMUSG00000001924,ENSMUSG00000002010,ENSMUSG00000002679,ENSMUSG00000002733,ENSMUSG00000003363,ENSMUSG00000003662,ENSMUSG00000004032,ENSMUSG00000005610,ENSMUSG00000005873,ENSMUSG00000005881,ENSMUSG00000006134,ENSMUSG00000006273,ENSMUSG00000006276,ENSMUSG00000006373,ENSMUSG00000006932,ENSMUSG00000007836,ENSMUSG00000007950,…
1	!	5.12e-07	189	243	17	0.07	0.09	GO:0043209	CC	1	myelin sheath	1	ENSMUSG00000000088,ENSMUSG00000006273,ENSMUSG00000008348,ENSMUSG00000020402,ENSMUSG00000022956,ENSMUSG00000024997,ENSMUSG00000025781,ENSMUSG00000027010,ENSMUSG00000028691,ENSMUSG00000029580,ENSMUSG00000030246,ENSMUSG00000030695,ENSMUSG00000031672,ENSMUSG00000034024,ENSMUSG00000037742,ENSMUSG00000058135,ENSMUSG00000071866
1	!	6.08e-07	795	243	34	0.14	0.043	GO:0031967	CC	1	organelle envelope	1	ENSMUSG00000000088,ENSMUSG00000013622,ENSMUSG00000018322,ENSMUSG00000018677,ENSMUSG00000019831,ENSMUSG00000020163,ENSMUSG00000020290,ENSMUSG00000020402,ENSMUSG00000021339,ENSMUSG00000021606,ENSMUSG00000021794,ENSMUSG00000022450,ENSMUSG00000022956,ENSMUSG00000023861,ENSMUSG00000024248,ENSMUSG00000024978,ENSMUSG00000025781,ENSMUSG00000027010,ENSMUSG00000028648,ENSMUSG00000028756,ENSMUSG00000029430,…
1	!	6.5e-07	797	243	34	0.14	0.043	GO:0031975	CC	1	envelope	1	ENSMUSG00000000088,ENSMUSG00000013622,ENSMUSG00000018322,ENSMUSG00000018677,ENSMUSG00000019831,ENSMUSG00000020163,ENSMUSG00000020290,ENSMUSG00000020402,ENSMUSG00000021339,ENSMUSG00000021606,ENSMUSG00000021794,ENSMUSG00000022450,ENSMUSG00000022956,ENSMUSG00000023861,ENSMUSG00000024248,ENSMUSG00000024978,ENSMUSG00000025781,ENSMUSG00000027010,ENSMUSG00000028648,ENSMUSG00000028756,ENSMUSG00000029430,…
1	!	1.09e-06	2758	243	71	0.292	0.026	GO:0005829	CC	1	cytosol	1	ENSMUSG00000001018,ENSMUSG00000001924,ENSMUSG00000003662,ENSMUSG00000006273,ENSMUSG00000006932,ENSMUSG00000008348,ENSMUSG00000011179,ENSMUSG00000014769,ENSMUSG00000018322,ENSMUSG00000018585,ENSMUSG00000020038,ENSMUSG00000020290,ENSMUSG00000021048,ENSMUSG00000021877,ENSMUSG00000022200,ENSMUSG00000022336,ENSMUSG00000023150,ENSMUSG00000023456,ENSMUSG00000024997,ENSMUSG00000025290,ENSMUSG00000025362,…
1	!	1.18e-06	173	243	16	0.066	0.092	GO:0044455	CC	1	mitochondrial membrane part	1	ENSMUSG00000000088,ENSMUSG00000021606,ENSMUSG00000022450,ENSMUSG00000022956,ENSMUSG00000023861,ENSMUSG00000024248,ENSMUSG00000025781,ENSMUSG00000028648,ENSMUSG00000028756,ENSMUSG00000030647,ENSMUSG00000031198,ENSMUSG00000035885,ENSMUSG00000038717,ENSMUSG00000044894,ENSMUSG00000059534,ENSMUSG00000059734
1	!	1.35e-06	229	243	18	0.074	0.079	GO:0044445	CC	1	cytosolic part	1	ENSMUSG00000001018,ENSMUSG00000003662,ENSMUSG00000024997,ENSMUSG00000025290,ENSMUSG00000025362,ENSMUSG00000028234,ENSMUSG00000028495,ENSMUSG00000030603,ENSMUSG00000034024,ENSMUSG00000034892,ENSMUSG00000037563,ENSMUSG00000046330,ENSMUSG00000052146,ENSMUSG00000063457,ENSMUSG00000073640,ENSMUSG00000073940,ENSMUSG00000079641,ENSMUSG00000098274
1	!	1.45e-06	1388	243	46	0.189	0.033	GO:0044281	BP	1	small molecule metabolic process	1	ENSMUSG00000000088,ENSMUSG00000000214,ENSMUSG00000000708,ENSMUSG00000002010,ENSMUSG00000006932,ENSMUSG00000011179,ENSMUSG00000015090,ENSMUSG00000017754,ENSMUSG00000020038,ENSMUSG00000021048,ENSMUSG00000021417,ENSMUSG00000021606,ENSMUSG00000021794,ENSMUSG00000022463,ENSMUSG00000022956,ENSMUSG00000023456,ENSMUSG00000023861,ENSMUSG00000024248,ENSMUSG00000024827,ENSMUSG00000024978,ENSMUSG00000025203,…
1	!	1.49e-06	130	148	15	0.101	0.115	KEGG:03010	keg	1	Ribosome	1	ENSMUSG00000012848,ENSMUSG00000024829,ENSMUSG00000025290,ENSMUSG00000025362,ENSMUSG00000028234,ENSMUSG00000028495,ENSMUSG00000029066,ENSMUSG00000034892,ENSMUSG00000037563,ENSMUSG00000046330,ENSMUSG00000052146,ENSMUSG00000063457,ENSMUSG00000073640,ENSMUSG00000079641,ENSMUSG00000098274
1	!	1.65e-06	2605	243	68	0.28	0.026	GO:0043234	CC	1	protein complex	1	ENSMUSG00000000088,ENSMUSG00000000708,ENSMUSG00000001018,ENSMUSG00000002679,ENSMUSG00000003662,ENSMUSG00000006276,ENSMUSG00000006932,ENSMUSG00000014769,ENSMUSG00000016308,ENSMUSG00000019831,ENSMUSG00000020290,ENSMUSG00000020720,ENSMUSG00000020952,ENSMUSG00000021076,ENSMUSG00000021606,ENSMUSG00000021917,ENSMUSG00000022105,ENSMUSG00000022336,ENSMUSG00000022450,ENSMUSG00000022463,ENSMUSG00000022956,…
1	!	2.58e-06	13840	260	216	0.831	0.016	TF:M01981_1	tf	1	Factor: ELK-1; motif: ACCGGAWRTN; match class: 1	1	ENSMUSG00000000214,ENSMUSG00000000708,ENSMUSG00000001785,ENSMUSG00000001924,ENSMUSG00000002010,ENSMUSG00000002679,ENSMUSG00000002733,ENSMUSG00000003363,ENSMUSG00000003662,ENSMUSG00000004032,ENSMUSG00000005610,ENSMUSG00000005873,ENSMUSG00000005881,ENSMUSG00000006134,ENSMUSG00000006373,ENSMUSG00000006932,ENSMUSG00000007836,ENSMUSG00000007950,ENSMUSG00000008140,ENSMUSG00000008348,ENSMUSG00000011179,…
1	!	2.71e-06	133	243	14	0.058	0.105	GO:0098798	CC	1	mitochondrial protein complex	1	ENSMUSG00000000088,ENSMUSG00000021606,ENSMUSG00000022450,ENSMUSG00000022956,ENSMUSG00000024248,ENSMUSG00000025781,ENSMUSG00000028648,ENSMUSG00000028756,ENSMUSG00000030647,ENSMUSG00000035885,ENSMUSG00000038717,ENSMUSG00000044894,ENSMUSG00000059534,ENSMUSG00000059734
1	!	2.82e-06	11564	260	191	0.735	0.017	TF:M01986_0	tf	1	Factor: c-ets-1; motif: ACCGGAWRYN; match class: 0	1	ENSMUSG00000000214,ENSMUSG00000000708,ENSMUSG00000001785,ENSMUSG00000002010,ENSMUSG00000002679,ENSMUSG00000002733,ENSMUSG00000003363,ENSMUSG00000003662,ENSMUSG00000004032,ENSMUSG00000005610,ENSMUSG00000005873,ENSMUSG00000005881,ENSMUSG00000006134,ENSMUSG00000006276,ENSMUSG00000006373,ENSMUSG00000006932,ENSMUSG00000007836,ENSMUSG00000007950,ENSMUSG00000008348,ENSMUSG00000011179,ENSMUSG00000012848,…
1	!	2.97e-06	8680	260	156	0.6	0.018	TF:M02039_0	tf	1	Factor: GABPalpha; motif: ACCGGAARYN; match class: 0	1	ENSMUSG00000001785,ENSMUSG00000002010,ENSMUSG00000002679,ENSMUSG00000003363,ENSMUSG00000003662,ENSMUSG00000004032,ENSMUSG00000005610,ENSMUSG00000005873,ENSMUSG00000005881,ENSMUSG00000006276,ENSMUSG00000006373,ENSMUSG00000006932,ENSMUSG00000007836,ENSMUSG00000008348,ENSMUSG00000011179,ENSMUSG00000012848,ENSMUSG00000014504,ENSMUSG00000014905,ENSMUSG00000015090,ENSMUSG00000016308,ENSMUSG00000017754,…
1	!	3.49e-06	13396	260	211	0.812	0.016	TF:M01991_0	tf	1	Factor: PEA3; motif: RCCGGAAGYN; match class: 0	1	ENSMUSG00000000214,ENSMUSG00000000708,ENSMUSG00000001785,ENSMUSG00000001924,ENSMUSG00000002010,ENSMUSG00000002679,ENSMUSG00000002733,ENSMUSG00000003363,ENSMUSG00000003662,ENSMUSG00000004032,ENSMUSG00000005610,ENSMUSG00000005873,ENSMUSG00000005881,ENSMUSG00000006134,ENSMUSG00000006273,ENSMUSG00000006276,ENSMUSG00000006373,ENSMUSG00000006932,ENSMUSG00000007836,ENSMUSG00000007950,ENSMUSG00000008348,…
1	!	3.85e-06	8122	243	146	0.601	0.018	GO:0008152	BP	1	metabolic process	1	ENSMUSG00000000088,ENSMUSG00000000214,ENSMUSG00000000708,ENSMUSG00000001018,ENSMUSG00000001785,ENSMUSG00000001924,ENSMUSG00000002010,ENSMUSG00000002679,ENSMUSG00000003363,ENSMUSG00000003662,ENSMUSG00000004032,ENSMUSG00000006932,ENSMUSG00000007836,ENSMUSG00000011179,ENSMUSG00000013622,ENSMUSG00000014905,ENSMUSG00000015090,ENSMUSG00000016308,ENSMUSG00000017390,ENSMUSG00000017754,ENSMUSG00000020038,…
1	!	4.47e-06	115	243	13	0.053	0.113	GO:0098800	CC	1	inner mitochondrial membrane protein complex	1	ENSMUSG00000000088,ENSMUSG00000021606,ENSMUSG00000022450,ENSMUSG00000022956,ENSMUSG00000024248,ENSMUSG00000025781,ENSMUSG00000028648,ENSMUSG00000030647,ENSMUSG00000035885,ENSMUSG00000038717,ENSMUSG00000044894,ENSMUSG00000059534,ENSMUSG00000059734
1	!	6.49e-06	8527	260	153	0.588	0.018	TF:M01660_1	tf	1	Factor: GABP-alpha; motif: CTTCCK; match class: 1	1	ENSMUSG00000000214,ENSMUSG00000000708,ENSMUSG00000001924,ENSMUSG00000002010,ENSMUSG00000002679,ENSMUSG00000003363,ENSMUSG00000003662,ENSMUSG00000004032,ENSMUSG00000005610,ENSMUSG00000005873,ENSMUSG00000005881,ENSMUSG00000006276,ENSMUSG00000007836,ENSMUSG00000007950,ENSMUSG00000008348,ENSMUSG00000011179,ENSMUSG00000012848,ENSMUSG00000014504,ENSMUSG00000014769,ENSMUSG00000014905,ENSMUSG00000015090,…
1	!	8.39e-06	704	243	30	0.123	0.043	GO:0019637	BP	1	organophosphate metabolic process	1	ENSMUSG00000000088,ENSMUSG00000003363,ENSMUSG00000017390,ENSMUSG00000021048,ENSMUSG00000021606,ENSMUSG00000022956,ENSMUSG00000023456,ENSMUSG00000023861,ENSMUSG00000024248,ENSMUSG00000024978,ENSMUSG00000025477,ENSMUSG00000025950,ENSMUSG00000026385,ENSMUSG00000027952,ENSMUSG00000028070,ENSMUSG00000028756,ENSMUSG00000028773,ENSMUSG00000028937,ENSMUSG00000030695,ENSMUSG00000033917,ENSMUSG00000035885,…
1	!	1.79e-05	2211	260	59	0.227	0.027	TF:M07052_0	tf	1	Factor: NRF-1; motif: GCGCMTGCGCN; match class: 0	1	ENSMUSG00000001785,ENSMUSG00000003363,ENSMUSG00000004032,ENSMUSG00000006134,ENSMUSG00000006273,ENSMUSG00000006932,ENSMUSG00000008140,ENSMUSG00000008348,ENSMUSG00000011179,ENSMUSG00000014905,ENSMUSG00000016344,ENSMUSG00000019478,ENSMUSG00000020585,ENSMUSG00000021076,ENSMUSG00000021339,ENSMUSG00000021606,ENSMUSG00000021775,ENSMUSG00000021877,ENSMUSG00000022450,ENSMUSG00000022463,ENSMUSG00000024146,…
1	!	1.88e-05	10580	260	177	0.681	0.017	TF:M02933_0	tf	1	Factor: ZF5; motif: GYCGCGCARNGCNN; match class: 0	1	ENSMUSG00000000088,ENSMUSG00000000708,ENSMUSG00000001018,ENSMUSG00000001785,ENSMUSG00000001924,ENSMUSG00000002010,ENSMUSG00000002679,ENSMUSG00000002733,ENSMUSG00000003363,ENSMUSG00000003662,ENSMUSG00000004032,ENSMUSG00000005610,ENSMUSG00000005873,ENSMUSG00000006134,ENSMUSG00000006273,ENSMUSG00000006276,ENSMUSG00000006373,ENSMUSG00000006932,ENSMUSG00000007836,ENSMUSG00000007950,ENSMUSG00000008140,…
1	!	2.65e-05	13063	260	205	0.788	0.016	TF:M02089_0	tf	1	Factor: E2F-3; motif: GGCGGGN; match class: 0	1	ENSMUSG00000000088,ENSMUSG00000000214,ENSMUSG00000000708,ENSMUSG00000001018,ENSMUSG00000001785,ENSMUSG00000001924,ENSMUSG00000002010,ENSMUSG00000002679,ENSMUSG00000002733,ENSMUSG00000003363,ENSMUSG00000003662,ENSMUSG00000004032,ENSMUSG00000005610,ENSMUSG00000005873,ENSMUSG00000005881,ENSMUSG00000006273,ENSMUSG00000006276,ENSMUSG00000006373,ENSMUSG00000006932,ENSMUSG00000007836,ENSMUSG00000007950,…
1	!	3.27e-05	10979	260	181	0.696	0.016	TF:M01989_0	tf	1	Factor: Ets2; motif: ACCGGAWRYN; match class: 0	1	ENSMUSG00000000214,ENSMUSG00000000708,ENSMUSG00000002010,ENSMUSG00000002679,ENSMUSG00000002733,ENSMUSG00000003363,ENSMUSG00000003662,ENSMUSG00000004032,ENSMUSG00000005610,ENSMUSG00000005881,ENSMUSG00000006134,ENSMUSG00000006276,ENSMUSG00000006932,ENSMUSG00000007836,ENSMUSG00000007950,ENSMUSG00000008348,ENSMUSG00000011179,ENSMUSG00000012848,ENSMUSG00000014504,ENSMUSG00000014769,ENSMUSG00000014905,…
1	!	3.94e-05	191	243	15	0.062	0.079	GO:0044391	CC	1	ribosomal subunit	1	ENSMUSG00000020477,ENSMUSG00000024829,ENSMUSG00000025290,ENSMUSG00000025362,ENSMUSG00000028234,ENSMUSG00000028495,ENSMUSG00000029066,ENSMUSG00000034892,ENSMUSG00000037563,ENSMUSG00000046330,ENSMUSG00000052146,ENSMUSG00000063457,ENSMUSG00000073640,ENSMUSG00000079641,ENSMUSG00000098274
1	!	4.69e-05	7065	260	131	0.504	0.019	TF:M00025_1	tf	1	Factor: Elk-1; motif: NNNNCCGGAARTNN; match class: 1	1	ENSMUSG00000000708,ENSMUSG00000001785,ENSMUSG00000002010,ENSMUSG00000002679,ENSMUSG00000002733,ENSMUSG00000003363,ENSMUSG00000003662,ENSMUSG00000004032,ENSMUSG00000005610,ENSMUSG00000005881,ENSMUSG00000006932,ENSMUSG00000007836,ENSMUSG00000008348,ENSMUSG00000011179,ENSMUSG00000012848,ENSMUSG00000014504,ENSMUSG00000014769,ENSMUSG00000014905,ENSMUSG00000015090,ENSMUSG00000016344,ENSMUSG00000018322,…
1	!	5.29e-05	7840	243	139	0.572	0.018	GO:0071704	BP	1	organic substance metabolic process	1	ENSMUSG00000000088,ENSMUSG00000000214,ENSMUSG00000000708,ENSMUSG00000001018,ENSMUSG00000001785,ENSMUSG00000001924,ENSMUSG00000002010,ENSMUSG00000002679,ENSMUSG00000003363,ENSMUSG00000003662,ENSMUSG00000004032,ENSMUSG00000006932,ENSMUSG00000007836,ENSMUSG00000011179,ENSMUSG00000013622,ENSMUSG00000014905,ENSMUSG00000015090,ENSMUSG00000016308,ENSMUSG00000017390,ENSMUSG00000017754,ENSMUSG00000020038,…
1	!	6.47e-05	143	243	13	0.053	0.091	GO:0003735	MF	1	structural constituent of ribosome	1	ENSMUSG00000020477,ENSMUSG00000024829,ENSMUSG00000025290,ENSMUSG00000025362,ENSMUSG00000028234,ENSMUSG00000029066,ENSMUSG00000034892,ENSMUSG00000037563,ENSMUSG00000052146,ENSMUSG00000063457,ENSMUSG00000073640,ENSMUSG00000079641,ENSMUSG00000098274
1	!	7.21e-05	174	148	15	0.101	0.086	KEGG:05010	keg	1	Alzheimer's disease	1	ENSMUSG00000000088,ENSMUSG00000020163,ENSMUSG00000021606,ENSMUSG00000022450,ENSMUSG00000022956,ENSMUSG00000024248,ENSMUSG00000025781,ENSMUSG00000028648,ENSMUSG00000028969,ENSMUSG00000030647,ENSMUSG00000035885,ENSMUSG00000041697,ENSMUSG00000044894,ENSMUSG00000059534,ENSMUSG00000059734
1	!	7.47e-05	12596	243	194	0.798	0.015	GO:0009987	BP	1	cellular process	1	ENSMUSG00000000088,ENSMUSG00000000214,ENSMUSG00000000708,ENSMUSG00000001018,ENSMUSG00000001785,ENSMUSG00000001924,ENSMUSG00000002010,ENSMUSG00000002679,ENSMUSG00000003363,ENSMUSG00000003662,ENSMUSG00000004032,ENSMUSG00000006134,ENSMUSG00000006932,ENSMUSG00000007836,ENSMUSG00000008348,ENSMUSG00000011179,ENSMUSG00000013622,ENSMUSG00000014905,ENSMUSG00000015090,ENSMUSG00000016308,ENSMUSG00000016344,…
1	!	8e-05	5604	260	110	0.423	0.02	TF:M01987_0	tf	1	Factor: ER81; motif: RCCGGAWRYN; match class: 0	1	ENSMUSG00000002679,ENSMUSG00000003363,ENSMUSG00000003662,ENSMUSG00000004032,ENSMUSG00000005881,ENSMUSG00000006273,ENSMUSG00000008348,ENSMUSG00000012848,ENSMUSG00000014504,ENSMUSG00000014769,ENSMUSG00000015090,ENSMUSG00000016308,ENSMUSG00000017754,ENSMUSG00000018322,ENSMUSG00000020038,ENSMUSG00000020163,ENSMUSG00000020402,ENSMUSG00000020720,ENSMUSG00000020952,ENSMUSG00000021038,ENSMUSG00000021339,…
1	!	9.85e-05	4790	243	97	0.399	0.02	GO:1901564	BP	1	organonitrogen compound metabolic process	1	ENSMUSG00000000088,ENSMUSG00000000214,ENSMUSG00000000708,ENSMUSG00000001018,ENSMUSG00000001785,ENSMUSG00000001924,ENSMUSG00000004032,ENSMUSG00000006932,ENSMUSG00000011179,ENSMUSG00000013622,ENSMUSG00000014905,ENSMUSG00000016308,ENSMUSG00000020038,ENSMUSG00000020149,ENSMUSG00000020290,ENSMUSG00000020477,ENSMUSG00000020720,ENSMUSG00000021038,ENSMUSG00000021048,ENSMUSG00000021606,ENSMUSG00000021794,…
1	!	0.000112	124	243	12	0.049	0.097	GO:0022626	CC	1	cytosolic ribosome	1	ENSMUSG00000025290,ENSMUSG00000025362,ENSMUSG00000028234,ENSMUSG00000028495,ENSMUSG00000034892,ENSMUSG00000037563,ENSMUSG00000046330,ENSMUSG00000052146,ENSMUSG00000063457,ENSMUSG00000073640,ENSMUSG00000079641,ENSMUSG00000098274
1	!	0.000122	43	243	8	0.033	0.186	GO:0022627	CC	1	cytosolic small ribosomal subunit	1	ENSMUSG00000025290,ENSMUSG00000025362,ENSMUSG00000028234,ENSMUSG00000028495,ENSMUSG00000034892,ENSMUSG00000037563,ENSMUSG00000052146,ENSMUSG00000063457
1	!	0.000167	16103	260	234	0.9	0.015	TF:M00979_1	tf	1	Factor: Pax-6; motif: CTGACCTGGAACTM; match class: 1	1	ENSMUSG00000000088,ENSMUSG00000000214,ENSMUSG00000000708,ENSMUSG00000001018,ENSMUSG00000001785,ENSMUSG00000001924,ENSMUSG00000002010,ENSMUSG00000002679,ENSMUSG00000002733,ENSMUSG00000003363,ENSMUSG00000003662,ENSMUSG00000004032,ENSMUSG00000005610,ENSMUSG00000005873,ENSMUSG00000005881,ENSMUSG00000006134,ENSMUSG00000006273,ENSMUSG00000006276,ENSMUSG00000006373,ENSMUSG00000007836,ENSMUSG00000007950,…
1	!	0.000182	7428	243	132	0.543	0.018	GO:0044238	BP	1	primary metabolic process	1	ENSMUSG00000000088,ENSMUSG00000000214,ENSMUSG00000000708,ENSMUSG00000001018,ENSMUSG00000001785,ENSMUSG00000001924,ENSMUSG00000002679,ENSMUSG00000003363,ENSMUSG00000003662,ENSMUSG00000006932,ENSMUSG00000007836,ENSMUSG00000011179,ENSMUSG00000013622,ENSMUSG00000014905,ENSMUSG00000015090,ENSMUSG00000016308,ENSMUSG00000020038,ENSMUSG00000020149,ENSMUSG00000020290,ENSMUSG00000020477,ENSMUSG00000020720,…
1	!	0.000201	6750	243	123	0.506	0.018	GO:0016020	CC	1	membrane	1	ENSMUSG00000000088,ENSMUSG00000000214,ENSMUSG00000001924,ENSMUSG00000002679,ENSMUSG00000003363,ENSMUSG00000005881,ENSMUSG00000006273,ENSMUSG00000006276,ENSMUSG00000006373,ENSMUSG00000006932,ENSMUSG00000013622,ENSMUSG00000018322,ENSMUSG00000018677,ENSMUSG00000019478,ENSMUSG00000019831,ENSMUSG00000020149,ENSMUSG00000020163,ENSMUSG00000020290,ENSMUSG00000020402,ENSMUSG00000020720,ENSMUSG00000020952,…
1	!	0.000203	216	243	15	0.062	0.069	GO:0005840	CC	1	ribosome	1	ENSMUSG00000020477,ENSMUSG00000024829,ENSMUSG00000025290,ENSMUSG00000025362,ENSMUSG00000028234,ENSMUSG00000028495,ENSMUSG00000029066,ENSMUSG00000034892,ENSMUSG00000037563,ENSMUSG00000046330,ENSMUSG00000052146,ENSMUSG00000063457,ENSMUSG00000073640,ENSMUSG00000079641,ENSMUSG00000098274
1	!	0.000213	1576	243	45	0.185	0.029	GO:0009056	BP	1	catabolic process	1	ENSMUSG00000001018,ENSMUSG00000001924,ENSMUSG00000004032,ENSMUSG00000007836,ENSMUSG00000011179,ENSMUSG00000013622,ENSMUSG00000014905,ENSMUSG00000016308,ENSMUSG00000020149,ENSMUSG00000020290,ENSMUSG00000020402,ENSMUSG00000020720,ENSMUSG00000020952,ENSMUSG00000021417,ENSMUSG00000021794,ENSMUSG00000022336,ENSMUSG00000022463,ENSMUSG00000023456,ENSMUSG00000024827,ENSMUSG00000024870,ENSMUSG00000024926,…
1	!	0.000235	191	148	15	0.101	0.079	KEGG:05016	keg	1	Huntington's disease	1	ENSMUSG00000000088,ENSMUSG00000020163,ENSMUSG00000020402,ENSMUSG00000021606,ENSMUSG00000022450,ENSMUSG00000022956,ENSMUSG00000024248,ENSMUSG00000025781,ENSMUSG00000028648,ENSMUSG00000030647,ENSMUSG00000035885,ENSMUSG00000041697,ENSMUSG00000044894,ENSMUSG00000059534,ENSMUSG00000059734
1	!	0.000275	10316	260	170	0.654	0.016	TF:M04623_0	tf	1	Factor: Otx2; motif: YTAATCCN; match class: 0	1	ENSMUSG00000000088,ENSMUSG00000000708,ENSMUSG00000001018,ENSMUSG00000001785,ENSMUSG00000001924,ENSMUSG00000002010,ENSMUSG00000002679,ENSMUSG00000003363,ENSMUSG00000005610,ENSMUSG00000005881,ENSMUSG00000006134,ENSMUSG00000007836,ENSMUSG00000008348,ENSMUSG00000011179,ENSMUSG00000012848,ENSMUSG00000013622,ENSMUSG00000014504,ENSMUSG00000014905,ENSMUSG00000015090,ENSMUSG00000016308,ENSMUSG00000017390,…
1	!	0.000291	66	243	9	0.037	0.136	GO:0015935	CC	1	small ribosomal subunit	1	ENSMUSG00000020477,ENSMUSG00000025290,ENSMUSG00000025362,ENSMUSG00000028234,ENSMUSG00000028495,ENSMUSG00000034892,ENSMUSG00000037563,ENSMUSG00000052146,ENSMUSG00000063457
1	!	0.000328	1383	243	41	0.169	0.03	GO:0043933	BP	1	macromolecular complex subunit organization	1	ENSMUSG00000001018,ENSMUSG00000002679,ENSMUSG00000006932,ENSMUSG00000017754,ENSMUSG00000019831,ENSMUSG00000020149,ENSMUSG00000021038,ENSMUSG00000022682,ENSMUSG00000023020,ENSMUSG00000023094,ENSMUSG00000024248,ENSMUSG00000025868,ENSMUSG00000026245,ENSMUSG00000028070,ENSMUSG00000028552,ENSMUSG00000028648,ENSMUSG00000028756,ENSMUSG00000029066,ENSMUSG00000029126,ENSMUSG00000029621,ENSMUSG00000029840,…
1	!	0.000388	1317	148	47	0.318	0.036	KEGG:01100	keg	1	Metabolic pathways	1	ENSMUSG00000000088,ENSMUSG00000000214,ENSMUSG00000002010,ENSMUSG00000003363,ENSMUSG00000006273,ENSMUSG00000011179,ENSMUSG00000015090,ENSMUSG00000017390,ENSMUSG00000020163,ENSMUSG00000021048,ENSMUSG00000021606,ENSMUSG00000021794,ENSMUSG00000021871,ENSMUSG00000022450,ENSMUSG00000022956,ENSMUSG00000023456,ENSMUSG00000024827,ENSMUSG00000024978,ENSMUSG00000025477,ENSMUSG00000025781,ENSMUSG00000025950,…
1	!	0.000395	9952	260	165	0.635	0.017	TF:M00189_0	tf	1	Factor: AP-2; motif: MKCCCSCNGGCG; match class: 0	1	ENSMUSG00000000088,ENSMUSG00000000708,ENSMUSG00000001018,ENSMUSG00000002010,ENSMUSG00000002733,ENSMUSG00000003363,ENSMUSG00000004032,ENSMUSG00000005610,ENSMUSG00000005881,ENSMUSG00000006276,ENSMUSG00000006373,ENSMUSG00000006932,ENSMUSG00000007836,ENSMUSG00000007950,ENSMUSG00000008140,ENSMUSG00000008348,ENSMUSG00000011179,ENSMUSG00000013622,ENSMUSG00000014905,ENSMUSG00000015090,ENSMUSG00000016308,…
1	!	0.0004	1340	243	40	0.165	0.03	GO:0043167	MF	1	ion binding	1	ENSMUSG00000002010,ENSMUSG00000002733,ENSMUSG00000004032,ENSMUSG00000015090,ENSMUSG00000018585,ENSMUSG00000019478,ENSMUSG00000021794,ENSMUSG00000021877,ENSMUSG00000022200,ENSMUSG00000023094,ENSMUSG00000024827,ENSMUSG00000024870,ENSMUSG00000025825,ENSMUSG00000025950,ENSMUSG00000026385,ENSMUSG00000027010,ENSMUSG00000027423,ENSMUSG00000027712,ENSMUSG00000027952,ENSMUSG00000028756,ENSMUSG00000028773,…
1	!	0.00041	151	148	13	0.088	0.086	KEGG:04932	keg	1	Non-alcoholic fatty liver disease (NAFLD)	1	ENSMUSG00000000088,ENSMUSG00000020163,ENSMUSG00000021606,ENSMUSG00000022450,ENSMUSG00000024248,ENSMUSG00000028648,ENSMUSG00000030647,ENSMUSG00000035885,ENSMUSG00000041697,ENSMUSG00000044894,ENSMUSG00000059534,ENSMUSG00000059734,ENSMUSG00000071369
1	!	0.000432	69	243	9	0.037	0.13	GO:0005746	CC	1	mitochondrial respiratory chain	1	ENSMUSG00000000088,ENSMUSG00000021606,ENSMUSG00000022450,ENSMUSG00000028648,ENSMUSG00000030647,ENSMUSG00000035885,ENSMUSG00000044894,ENSMUSG00000059534,ENSMUSG00000059734
1	!	0.000436	168	243	13	0.053	0.077	GO:0046034	BP	1	ATP metabolic process	1	ENSMUSG00000000088,ENSMUSG00000021606,ENSMUSG00000022956,ENSMUSG00000023456,ENSMUSG00000024248,ENSMUSG00000028756,ENSMUSG00000030695,ENSMUSG00000035885,ENSMUSG00000038717,ENSMUSG00000044894,ENSMUSG00000051671,ENSMUSG00000059534,ENSMUSG00000063229
1	!	0.000504	12694	260	197	0.758	0.016	TF:M07380_0	tf	1	Factor: E2F-4; motif: NTTTCSCGCC; match class: 0	1	ENSMUSG00000000088,ENSMUSG00000000708,ENSMUSG00000001018,ENSMUSG00000001785,ENSMUSG00000001924,ENSMUSG00000002010,ENSMUSG00000002679,ENSMUSG00000002733,ENSMUSG00000003363,ENSMUSG00000003662,ENSMUSG00000005610,ENSMUSG00000005873,ENSMUSG00000005881,ENSMUSG00000006134,ENSMUSG00000006276,ENSMUSG00000006373,ENSMUSG00000006932,ENSMUSG00000007836,ENSMUSG00000007950,ENSMUSG00000008140,ENSMUSG00000008348,…
1	!	0.000505	2857	260	66	0.254	0.023	TF:M01984_1	tf	1	Factor: ERF; motif: ACCGGAARTN; match class: 1	1	ENSMUSG00000002679,ENSMUSG00000003363,ENSMUSG00000004032,ENSMUSG00000005881,ENSMUSG00000008348,ENSMUSG00000011179,ENSMUSG00000012848,ENSMUSG00000014504,ENSMUSG00000014769,ENSMUSG00000014905,ENSMUSG00000015090,ENSMUSG00000016344,ENSMUSG00000017754,ENSMUSG00000018322,ENSMUSG00000020163,ENSMUSG00000020402,ENSMUSG00000021038,ENSMUSG00000021610,ENSMUSG00000021871,ENSMUSG00000022200,ENSMUSG00000022682,…
1	!	0.000513	10724	260	174	0.669	0.016	TF:M01387_0	tf	1	Factor: Otx2; motif: NNNRGGGATTAATNNNN; match class: 0	1	ENSMUSG00000000088,ENSMUSG00000000708,ENSMUSG00000001018,ENSMUSG00000001785,ENSMUSG00000001924,ENSMUSG00000002010,ENSMUSG00000002679,ENSMUSG00000003363,ENSMUSG00000005610,ENSMUSG00000005881,ENSMUSG00000006134,ENSMUSG00000007836,ENSMUSG00000008348,ENSMUSG00000011179,ENSMUSG00000012848,ENSMUSG00000013622,ENSMUSG00000014504,ENSMUSG00000014905,ENSMUSG00000015090,ENSMUSG00000016308,ENSMUSG00000017390,…
1	!	0.000515	9985	260	165	0.635	0.017	TF:M01979_0	tf	1	Factor: ELF4; motif: CCCGGAARTN; match class: 0	1	ENSMUSG00000000214,ENSMUSG00000000708,ENSMUSG00000001785,ENSMUSG00000002010,ENSMUSG00000002679,ENSMUSG00000002733,ENSMUSG00000003363,ENSMUSG00000003662,ENSMUSG00000004032,ENSMUSG00000005873,ENSMUSG00000005881,ENSMUSG00000006373,ENSMUSG00000006932,ENSMUSG00000007950,ENSMUSG00000008348,ENSMUSG00000011179,ENSMUSG00000012848,ENSMUSG00000014504,ENSMUSG00000014769,ENSMUSG00000014905,ENSMUSG00000015090,…
1	!	0.00052	708	243	27	0.111	0.038	GO:0043436	BP	1	oxoacid metabolic process	1	ENSMUSG00000000214,ENSMUSG00000002010,ENSMUSG00000006932,ENSMUSG00000011179,ENSMUSG00000015090,ENSMUSG00000021048,ENSMUSG00000021417,ENSMUSG00000021606,ENSMUSG00000021794,ENSMUSG00000023456,ENSMUSG00000023861,ENSMUSG00000024827,ENSMUSG00000024978,ENSMUSG00000025203,ENSMUSG00000025950,ENSMUSG00000026245,ENSMUSG00000028773,ENSMUSG00000028937,ENSMUSG00000030246,ENSMUSG00000030695,ENSMUSG00000031672,…
1	!	0.000534	2566	243	61	0.251	0.024	GO:0012505	CC	1	endomembrane system	1	ENSMUSG00000000214,ENSMUSG00000001018,ENSMUSG00000001785,ENSMUSG00000001924,ENSMUSG00000002733,ENSMUSG00000003363,ENSMUSG00000006276,ENSMUSG00000006373,ENSMUSG00000013622,ENSMUSG00000014905,ENSMUSG00000015090,ENSMUSG00000019478,ENSMUSG00000020149,ENSMUSG00000020290,ENSMUSG00000021038,ENSMUSG00000021877,ENSMUSG00000021917,ENSMUSG00000022200,ENSMUSG00000022261,ENSMUSG00000022463,ENSMUSG00000022517,…
1	!	0.000564	18315	260	252	0.969	0.014	TF:M01240_0	tf	1	Factor: BEN; motif: CAGCGRNV; match class: 0	1	ENSMUSG00000000088,ENSMUSG00000000214,ENSMUSG00000000708,ENSMUSG00000001018,ENSMUSG00000001785,ENSMUSG00000001924,ENSMUSG00000002010,ENSMUSG00000002679,ENSMUSG00000002733,ENSMUSG00000003363,ENSMUSG00000003662,ENSMUSG00000004032,ENSMUSG00000005610,ENSMUSG00000005873,ENSMUSG00000005881,ENSMUSG00000006134,ENSMUSG00000006273,ENSMUSG00000006276,ENSMUSG00000006373,ENSMUSG00000006932,ENSMUSG00000007836,…
1	!	0.000596	268	243	16	0.066	0.06	GO:0045296	MF	1	cadherin binding	1	ENSMUSG00000006134,ENSMUSG00000006276,ENSMUSG00000006932,ENSMUSG00000020149,ENSMUSG00000022336,ENSMUSG00000025362,ENSMUSG00000025950,ENSMUSG00000027423,ENSMUSG00000028552,ENSMUSG00000028691,ENSMUSG00000029247,ENSMUSG00000029430,ENSMUSG00000030695,ENSMUSG00000063229,ENSMUSG00000074403,ENSMUSG00000098274
1	!	0.000599	759	243	28	0.115	0.037	GO:0034622	BP	1	cellular macromolecular complex assembly	1	ENSMUSG00000002679,ENSMUSG00000019831,ENSMUSG00000020149,ENSMUSG00000023020,ENSMUSG00000023094,ENSMUSG00000024248,ENSMUSG00000025868,ENSMUSG00000028552,ENSMUSG00000028648,ENSMUSG00000029066,ENSMUSG00000029126,ENSMUSG00000029621,ENSMUSG00000029840,ENSMUSG00000030591,ENSMUSG00000030603,ENSMUSG00000030647,ENSMUSG00000034024,ENSMUSG00000051671,ENSMUSG00000052146,ENSMUSG00000059325,ENSMUSG00000059534,…
1	!	0.000615	9495	243	156	0.642	0.016	GO:0005488	MF	1	binding	1	ENSMUSG00000000214,ENSMUSG00000000708,ENSMUSG00000001018,ENSMUSG00000001785,ENSMUSG00000001924,ENSMUSG00000002010,ENSMUSG00000002679,ENSMUSG00000002733,ENSMUSG00000004032,ENSMUSG00000006134,ENSMUSG00000006276,ENSMUSG00000006373,ENSMUSG00000006932,ENSMUSG00000007836,ENSMUSG00000008348,ENSMUSG00000011179,ENSMUSG00000014905,ENSMUSG00000015090,ENSMUSG00000016308,ENSMUSG00000017390,ENSMUSG00000018322,…
1	!	0.000628	72	243	9	0.037	0.125	GO:0070469	CC	1	respiratory chain	1	ENSMUSG00000000088,ENSMUSG00000021606,ENSMUSG00000022450,ENSMUSG00000028648,ENSMUSG00000030647,ENSMUSG00000035885,ENSMUSG00000044894,ENSMUSG00000059534,ENSMUSG00000059734
1	!	0.000628	72	243	9	0.037	0.125	GO:0098803	CC	1	respiratory chain complex	1	ENSMUSG00000000088,ENSMUSG00000021606,ENSMUSG00000022450,ENSMUSG00000028648,ENSMUSG00000030647,ENSMUSG00000035885,ENSMUSG00000044894,ENSMUSG00000059534,ENSMUSG00000059734
1	!	0.000676	18332	260	252	0.969	0.014	TF:M07991_0	tf	1	Factor: Hes1; motif: NNCACGYGNN; match class: 0	1	ENSMUSG00000000088,ENSMUSG00000000214,ENSMUSG00000000708,ENSMUSG00000001018,ENSMUSG00000001785,ENSMUSG00000001924,ENSMUSG00000002010,ENSMUSG00000002679,ENSMUSG00000002733,ENSMUSG00000003363,ENSMUSG00000003662,ENSMUSG00000004032,ENSMUSG00000005610,ENSMUSG00000005873,ENSMUSG00000005881,ENSMUSG00000006134,ENSMUSG00000006273,ENSMUSG00000006276,ENSMUSG00000006373,ENSMUSG00000006932,ENSMUSG00000007836,…
1	!	0.000687	718	243	27	0.111	0.038	GO:0006082	BP	1	organic acid metabolic process	1	ENSMUSG00000000214,ENSMUSG00000002010,ENSMUSG00000006932,ENSMUSG00000011179,ENSMUSG00000015090,ENSMUSG00000021048,ENSMUSG00000021417,ENSMUSG00000021606,ENSMUSG00000021794,ENSMUSG00000023456,ENSMUSG00000023861,ENSMUSG00000024827,ENSMUSG00000024978,ENSMUSG00000025203,ENSMUSG00000025950,ENSMUSG00000026245,ENSMUSG00000028773,ENSMUSG00000028937,ENSMUSG00000030246,ENSMUSG00000030695,ENSMUSG00000031672,…
1	!	0.000769	4247	260	87	0.335	0.02	TF:M03791_0	tf	1	Factor: GABPalpha_GABPbeta; motif: CTTCCKGY; match class: 0	1	ENSMUSG00000002010,ENSMUSG00000002679,ENSMUSG00000003363,ENSMUSG00000003662,ENSMUSG00000004032,ENSMUSG00000005610,ENSMUSG00000005881,ENSMUSG00000008348,ENSMUSG00000011179,ENSMUSG00000012848,ENSMUSG00000014504,ENSMUSG00000015090,ENSMUSG00000018322,ENSMUSG00000018585,ENSMUSG00000020137,ENSMUSG00000020163,ENSMUSG00000020402,ENSMUSG00000020720,ENSMUSG00000020952,ENSMUSG00000021038,ENSMUSG00000021606,…
1	!	0.000784	7052	243	125	0.514	0.018	GO:0006807	BP	1	nitrogen compound metabolic process	1	ENSMUSG00000000088,ENSMUSG00000000214,ENSMUSG00000000708,ENSMUSG00000001018,ENSMUSG00000001785,ENSMUSG00000001924,ENSMUSG00000002679,ENSMUSG00000003662,ENSMUSG00000004032,ENSMUSG00000006932,ENSMUSG00000007836,ENSMUSG00000011179,ENSMUSG00000013622,ENSMUSG00000014905,ENSMUSG00000016308,ENSMUSG00000020038,ENSMUSG00000020149,ENSMUSG00000020290,ENSMUSG00000020477,ENSMUSG00000020720,ENSMUSG00000021038,…
1	!	0.000804	8686	260	148	0.569	0.017	TF:M01984_0	tf	1	Factor: ERF; motif: ACCGGAARTN; match class: 0	1	ENSMUSG00000000708,ENSMUSG00000001924,ENSMUSG00000002010,ENSMUSG00000002679,ENSMUSG00000002733,ENSMUSG00000003363,ENSMUSG00000003662,ENSMUSG00000004032,ENSMUSG00000005610,ENSMUSG00000005881,ENSMUSG00000006276,ENSMUSG00000007836,ENSMUSG00000007950,ENSMUSG00000008348,ENSMUSG00000011179,ENSMUSG00000012848,ENSMUSG00000014504,ENSMUSG00000014769,ENSMUSG00000014905,ENSMUSG00000015090,ENSMUSG00000016344,…
1	!	0.000819	4455	260	90	0.346	0.02	TF:M02038_0	tf	1	Factor: Fli-1; motif: ACCGGAARYN; match class: 0	1	ENSMUSG00000002010,ENSMUSG00000002679,ENSMUSG00000003363,ENSMUSG00000003662,ENSMUSG00000004032,ENSMUSG00000005881,ENSMUSG00000008348,ENSMUSG00000011179,ENSMUSG00000012848,ENSMUSG00000014504,ENSMUSG00000015090,ENSMUSG00000016308,ENSMUSG00000017754,ENSMUSG00000018322,ENSMUSG00000018585,ENSMUSG00000020163,ENSMUSG00000020402,ENSMUSG00000020720,ENSMUSG00000020952,ENSMUSG00000021038,ENSMUSG00000021606,…
1	!	0.000879	12853	260	198	0.762	0.015	TF:M01447_0	tf	1	Factor: PITX2; motif: NNNNRGGATTAATNNNN; match class: 0	1	ENSMUSG00000000088,ENSMUSG00000000708,ENSMUSG00000001018,ENSMUSG00000001785,ENSMUSG00000001924,ENSMUSG00000002010,ENSMUSG00000002679,ENSMUSG00000003363,ENSMUSG00000004032,ENSMUSG00000005610,ENSMUSG00000005873,ENSMUSG00000005881,ENSMUSG00000006134,ENSMUSG00000006273,ENSMUSG00000006276,ENSMUSG00000006373,ENSMUSG00000007836,ENSMUSG00000007950,ENSMUSG00000008140,ENSMUSG00000008348,ENSMUSG00000011179,…
1	!	0.000889	112	59	11	0.186	0.098	HP:0010972	hp	1	Anemia of inadequate production	1	ENSMUSG00000023456,ENSMUSG00000025290,ENSMUSG00000025362,ENSMUSG00000025825,ENSMUSG00000030695,ENSMUSG00000034892,ENSMUSG00000035202,ENSMUSG00000037049,ENSMUSG00000052146,ENSMUSG00000073940,ENSMUSG00000088088
1	!	0.000964	9181	260	154	0.592	0.017	TF:M02914_0	tf	1	Factor: SP4; motif: NNWAGGCGTGNCNNN; match class: 0	1	ENSMUSG00000002679,ENSMUSG00000003363,ENSMUSG00000005610,ENSMUSG00000005873,ENSMUSG00000005881,ENSMUSG00000006134,ENSMUSG00000006276,ENSMUSG00000007836,ENSMUSG00000007950,ENSMUSG00000008140,ENSMUSG00000011179,ENSMUSG00000012848,ENSMUSG00000013622,ENSMUSG00000014504,ENSMUSG00000014769,ENSMUSG00000014905,ENSMUSG00000015090,ENSMUSG00000016308,ENSMUSG00000016344,ENSMUSG00000017390,ENSMUSG00000017754,…
1	!	0.00106	12966	260	199	0.765	0.015	TF:M02090_0	tf	1	Factor: E2F-4; motif: GCGGGAAANA; match class: 0	1	ENSMUSG00000000088,ENSMUSG00000000214,ENSMUSG00000000708,ENSMUSG00000001018,ENSMUSG00000001785,ENSMUSG00000001924,ENSMUSG00000002010,ENSMUSG00000002679,ENSMUSG00000002733,ENSMUSG00000003363,ENSMUSG00000003662,ENSMUSG00000005610,ENSMUSG00000005873,ENSMUSG00000005881,ENSMUSG00000006134,ENSMUSG00000006273,ENSMUSG00000006276,ENSMUSG00000006373,ENSMUSG00000006932,ENSMUSG00000007836,ENSMUSG00000007950,…
1	!	0.0011	4757	260	94	0.362	0.02	TF:M01989_1	tf	1	Factor: Ets2; motif: ACCGGAWRYN; match class: 1	1	ENSMUSG00000000708,ENSMUSG00000002010,ENSMUSG00000002679,ENSMUSG00000003363,ENSMUSG00000004032,ENSMUSG00000005881,ENSMUSG00000007950,ENSMUSG00000008348,ENSMUSG00000011179,ENSMUSG00000012848,ENSMUSG00000014504,ENSMUSG00000014769,ENSMUSG00000014905,ENSMUSG00000015090,ENSMUSG00000017754,ENSMUSG00000018322,ENSMUSG00000018585,ENSMUSG00000020163,ENSMUSG00000020402,ENSMUSG00000020720,ENSMUSG00000021038,…
1	!	0.00117	183	243	13	0.053	0.071	GO:0009205	BP	1	purine ribonucleoside triphosphate metabolic process	1	ENSMUSG00000000088,ENSMUSG00000021606,ENSMUSG00000022956,ENSMUSG00000023456,ENSMUSG00000024248,ENSMUSG00000028756,ENSMUSG00000030695,ENSMUSG00000035885,ENSMUSG00000038717,ENSMUSG00000044894,ENSMUSG00000051671,ENSMUSG00000059534,ENSMUSG00000063229
1	!	0.00117	183	243	13	0.053	0.071	GO:0009167	BP	1	purine ribonucleoside monophosphate metabolic process	1	ENSMUSG00000000088,ENSMUSG00000021606,ENSMUSG00000022956,ENSMUSG00000023456,ENSMUSG00000024248,ENSMUSG00000028756,ENSMUSG00000030695,ENSMUSG00000035885,ENSMUSG00000038717,ENSMUSG00000044894,ENSMUSG00000051671,ENSMUSG00000059534,ENSMUSG00000063229
1	!	0.00125	184	243	13	0.053	0.071	GO:0009161	BP	1	ribonucleoside monophosphate metabolic process	1	ENSMUSG00000000088,ENSMUSG00000021606,ENSMUSG00000022956,ENSMUSG00000023456,ENSMUSG00000024248,ENSMUSG00000028756,ENSMUSG00000030695,ENSMUSG00000035885,ENSMUSG00000038717,ENSMUSG00000044894,ENSMUSG00000051671,ENSMUSG00000059534,ENSMUSG00000063229
1	!	0.00125	184	243	13	0.053	0.071	GO:0009126	BP	1	purine nucleoside monophosphate metabolic process	1	ENSMUSG00000000088,ENSMUSG00000021606,ENSMUSG00000022956,ENSMUSG00000023456,ENSMUSG00000024248,ENSMUSG00000028756,ENSMUSG00000030695,ENSMUSG00000035885,ENSMUSG00000038717,ENSMUSG00000044894,ENSMUSG00000051671,ENSMUSG00000059534,ENSMUSG00000063229
1	!	0.00133	185	243	13	0.053	0.07	GO:0009199	BP	1	ribonucleoside triphosphate metabolic process	1	ENSMUSG00000000088,ENSMUSG00000021606,ENSMUSG00000022956,ENSMUSG00000023456,ENSMUSG00000024248,ENSMUSG00000028756,ENSMUSG00000030695,ENSMUSG00000035885,ENSMUSG00000038717,ENSMUSG00000044894,ENSMUSG00000051671,ENSMUSG00000059534,ENSMUSG00000063229
1	!	0.00138	7298	260	129	0.496	0.018	TF:M01991_1	tf	1	Factor: PEA3; motif: RCCGGAAGYN; match class: 1	1	ENSMUSG00000000708,ENSMUSG00000001785,ENSMUSG00000002010,ENSMUSG00000002679,ENSMUSG00000003363,ENSMUSG00000003662,ENSMUSG00000004032,ENSMUSG00000005610,ENSMUSG00000005881,ENSMUSG00000007950,ENSMUSG00000008348,ENSMUSG00000011179,ENSMUSG00000012848,ENSMUSG00000014504,ENSMUSG00000014769,ENSMUSG00000014905,ENSMUSG00000015090,ENSMUSG00000017754,ENSMUSG00000018322,ENSMUSG00000018585,ENSMUSG00000020163,…
1	!	0.00145	4854	260	95	0.365	0.02	TF:M01977_1	tf	1	Factor: ESE-1; motif: NSMGGAARYN; match class: 1	1	ENSMUSG00000002679,ENSMUSG00000002733,ENSMUSG00000003363,ENSMUSG00000004032,ENSMUSG00000005881,ENSMUSG00000008348,ENSMUSG00000011179,ENSMUSG00000012848,ENSMUSG00000014504,ENSMUSG00000014769,ENSMUSG00000014905,ENSMUSG00000015090,ENSMUSG00000016308,ENSMUSG00000016344,ENSMUSG00000017754,ENSMUSG00000018322,ENSMUSG00000020163,ENSMUSG00000020386,ENSMUSG00000020402,ENSMUSG00000020948,ENSMUSG00000020952,…
1	!	0.0015	655	243	25	0.103	0.038	GO:0019752	BP	1	carboxylic acid metabolic process	1	ENSMUSG00000000214,ENSMUSG00000002010,ENSMUSG00000011179,ENSMUSG00000015090,ENSMUSG00000021048,ENSMUSG00000021417,ENSMUSG00000021606,ENSMUSG00000021794,ENSMUSG00000023456,ENSMUSG00000023861,ENSMUSG00000024827,ENSMUSG00000024978,ENSMUSG00000025203,ENSMUSG00000025950,ENSMUSG00000026245,ENSMUSG00000028773,ENSMUSG00000028937,ENSMUSG00000030246,ENSMUSG00000030695,ENSMUSG00000031672,ENSMUSG00000031982,…
1	!	0.00166	13837	260	208	0.8	0.015	TF:M01993_0	tf	1	Factor: TEL1; motif: CNCGGAANNN; match class: 0	1	ENSMUSG00000000214,ENSMUSG00000000708,ENSMUSG00000001785,ENSMUSG00000001924,ENSMUSG00000002010,ENSMUSG00000002679,ENSMUSG00000002733,ENSMUSG00000003363,ENSMUSG00000003662,ENSMUSG00000004032,ENSMUSG00000005610,ENSMUSG00000005873,ENSMUSG00000005881,ENSMUSG00000006134,ENSMUSG00000006273,ENSMUSG00000006276,ENSMUSG00000006373,ENSMUSG00000007836,ENSMUSG00000007950,ENSMUSG00000008140,ENSMUSG00000008348,…
1	!	0.00169	1202	243	36	0.148	0.03	GO:0065003	BP	1	macromolecular complex assembly	1	ENSMUSG00000002679,ENSMUSG00000006932,ENSMUSG00000019831,ENSMUSG00000020149,ENSMUSG00000022682,ENSMUSG00000023020,ENSMUSG00000023094,ENSMUSG00000024248,ENSMUSG00000025868,ENSMUSG00000026245,ENSMUSG00000028070,ENSMUSG00000028552,ENSMUSG00000028648,ENSMUSG00000028756,ENSMUSG00000029066,ENSMUSG00000029126,ENSMUSG00000029621,ENSMUSG00000029840,ENSMUSG00000030591,ENSMUSG00000030603,ENSMUSG00000030647,…
1	!	0.0018	190	243	13	0.053	0.068	GO:0009144	BP	1	purine nucleoside triphosphate metabolic process	1	ENSMUSG00000000088,ENSMUSG00000021606,ENSMUSG00000022956,ENSMUSG00000023456,ENSMUSG00000024248,ENSMUSG00000028756,ENSMUSG00000030695,ENSMUSG00000035885,ENSMUSG00000038717,ENSMUSG00000044894,ENSMUSG00000051671,ENSMUSG00000059534,ENSMUSG00000063229
1	!	0.00191	191	243	13	0.053	0.068	GO:0009123	BP	1	nucleoside monophosphate metabolic process	1	ENSMUSG00000000088,ENSMUSG00000021606,ENSMUSG00000022956,ENSMUSG00000023456,ENSMUSG00000024248,ENSMUSG00000028756,ENSMUSG00000030695,ENSMUSG00000035885,ENSMUSG00000038717,ENSMUSG00000044894,ENSMUSG00000051671,ENSMUSG00000059534,ENSMUSG00000063229
1	!	0.00204	133	243	11	0.045	0.083	GO:0007033	BP	1	vacuole organization	1	ENSMUSG00000001018,ENSMUSG00000020149,ENSMUSG00000020952,ENSMUSG00000024870,ENSMUSG00000028756,ENSMUSG00000029234,ENSMUSG00000031696,ENSMUSG00000033396,ENSMUSG00000037526,ENSMUSG00000038160,ENSMUSG00000050148
1	!	0.00216	1058	243	33	0.136	0.031	GO:0071822	BP	1	protein complex subunit organization	1	ENSMUSG00000001018,ENSMUSG00000006932,ENSMUSG00000019831,ENSMUSG00000021038,ENSMUSG00000022682,ENSMUSG00000023020,ENSMUSG00000023094,ENSMUSG00000024248,ENSMUSG00000025868,ENSMUSG00000026245,ENSMUSG00000028070,ENSMUSG00000028552,ENSMUSG00000028648,ENSMUSG00000028756,ENSMUSG00000029126,ENSMUSG00000029621,ENSMUSG00000029840,ENSMUSG00000030591,ENSMUSG00000030603,ENSMUSG00000030647,ENSMUSG00000030695,…
1	!	0.00216	6027	260	111	0.427	0.018	TF:M01988_0	tf	1	Factor: ER71; motif: ACCGGAARYN; match class: 0	1	ENSMUSG00000002010,ENSMUSG00000002679,ENSMUSG00000003363,ENSMUSG00000003662,ENSMUSG00000004032,ENSMUSG00000005881,ENSMUSG00000008348,ENSMUSG00000011179,ENSMUSG00000012848,ENSMUSG00000014504,ENSMUSG00000015090,ENSMUSG00000016308,ENSMUSG00000017754,ENSMUSG00000018322,ENSMUSG00000018585,ENSMUSG00000020163,ENSMUSG00000020402,ENSMUSG00000020720,ENSMUSG00000020952,ENSMUSG00000021038,ENSMUSG00000021606,…
1	!	0.00221	2242	243	54	0.222	0.024	GO:0044085	BP	1	cellular component biogenesis	1	ENSMUSG00000002679,ENSMUSG00000003662,ENSMUSG00000006932,ENSMUSG00000019831,ENSMUSG00000020149,ENSMUSG00000020290,ENSMUSG00000020952,ENSMUSG00000022200,ENSMUSG00000022682,ENSMUSG00000023020,ENSMUSG00000023094,ENSMUSG00000024248,ENSMUSG00000024870,ENSMUSG00000025290,ENSMUSG00000025868,ENSMUSG00000026245,ENSMUSG00000028070,ENSMUSG00000028495,ENSMUSG00000028552,ENSMUSG00000028648,ENSMUSG00000028756,…
1	!	0.00227	13695	260	206	0.792	0.015	TF:M07266_1	tf	1	Factor: p300; motif: CTGNCTYMAN; match class: 1	1	ENSMUSG00000000088,ENSMUSG00000000708,ENSMUSG00000001018,ENSMUSG00000001785,ENSMUSG00000002010,ENSMUSG00000002679,ENSMUSG00000003363,ENSMUSG00000003662,ENSMUSG00000004032,ENSMUSG00000005873,ENSMUSG00000005881,ENSMUSG00000006134,ENSMUSG00000006273,ENSMUSG00000006276,ENSMUSG00000006373,ENSMUSG00000006932,ENSMUSG00000007950,ENSMUSG00000008140,ENSMUSG00000008348,ENSMUSG00000011179,ENSMUSG00000012848,…
1	!	0.00232	7211	260	127	0.488	0.018	TF:M01199_0	tf	1	Factor: RNF96; motif: BCCCGCRGCC; match class: 0	1	ENSMUSG00000000088,ENSMUSG00000000708,ENSMUSG00000002010,ENSMUSG00000002679,ENSMUSG00000002733,ENSMUSG00000005610,ENSMUSG00000005873,ENSMUSG00000006276,ENSMUSG00000006373,ENSMUSG00000006932,ENSMUSG00000007836,ENSMUSG00000007950,ENSMUSG00000008140,ENSMUSG00000008348,ENSMUSG00000011179,ENSMUSG00000016308,ENSMUSG00000016344,ENSMUSG00000017754,ENSMUSG00000018322,ENSMUSG00000018677,ENSMUSG00000019478,…
1	!	0.00237	1381	243	39	0.16	0.028	GO:0044248	BP	1	cellular catabolic process	1	ENSMUSG00000001018,ENSMUSG00000001924,ENSMUSG00000004032,ENSMUSG00000007836,ENSMUSG00000013622,ENSMUSG00000014905,ENSMUSG00000016308,ENSMUSG00000020149,ENSMUSG00000020402,ENSMUSG00000020720,ENSMUSG00000020952,ENSMUSG00000021417,ENSMUSG00000021794,ENSMUSG00000022336,ENSMUSG00000022463,ENSMUSG00000023456,ENSMUSG00000024827,ENSMUSG00000024870,ENSMUSG00000024926,ENSMUSG00000024997,ENSMUSG00000025950,…
1	!	0.00241	9779	260	160	0.615	0.016	TF:M00430_0	tf	1	Factor: E2F-1; motif: NTTSGCGG; match class: 0	1	ENSMUSG00000000088,ENSMUSG00000000214,ENSMUSG00000000708,ENSMUSG00000001785,ENSMUSG00000001924,ENSMUSG00000002679,ENSMUSG00000003363,ENSMUSG00000003662,ENSMUSG00000005610,ENSMUSG00000005873,ENSMUSG00000006134,ENSMUSG00000006373,ENSMUSG00000006932,ENSMUSG00000007836,ENSMUSG00000007950,ENSMUSG00000008348,ENSMUSG00000011179,ENSMUSG00000012848,ENSMUSG00000014769,ENSMUSG00000014905,ENSMUSG00000015090,…
1	!	0.00303	1340	243	38	0.156	0.028	GO:0046907	BP	1	intracellular transport	1	ENSMUSG00000001018,ENSMUSG00000005881,ENSMUSG00000006932,ENSMUSG00000018322,ENSMUSG00000018585,ENSMUSG00000018677,ENSMUSG00000020149,ENSMUSG00000020290,ENSMUSG00000021038,ENSMUSG00000021339,ENSMUSG00000021917,ENSMUSG00000022463,ENSMUSG00000022517,ENSMUSG00000022956,ENSMUSG00000023861,ENSMUSG00000024870,ENSMUSG00000027010,ENSMUSG00000027423,ENSMUSG00000028049,ENSMUSG00000028552,ENSMUSG00000028691,…
1	!	0.00317	777	243	27	0.111	0.035	GO:0098805	CC	1	whole membrane	1	ENSMUSG00000000214,ENSMUSG00000001924,ENSMUSG00000006273,ENSMUSG00000006276,ENSMUSG00000006932,ENSMUSG00000013622,ENSMUSG00000018322,ENSMUSG00000019831,ENSMUSG00000020290,ENSMUSG00000020402,ENSMUSG00000024870,ENSMUSG00000027423,ENSMUSG00000028552,ENSMUSG00000028756,ENSMUSG00000029234,ENSMUSG00000030246,ENSMUSG00000030327,ENSMUSG00000031198,ENSMUSG00000031447,ENSMUSG00000031696,ENSMUSG00000033396,…
1	!	0.00347	928	243	30	0.123	0.032	GO:0006461	BP	1	protein complex assembly	1	ENSMUSG00000006932,ENSMUSG00000019831,ENSMUSG00000022682,ENSMUSG00000023020,ENSMUSG00000023094,ENSMUSG00000024248,ENSMUSG00000025868,ENSMUSG00000026245,ENSMUSG00000028070,ENSMUSG00000028552,ENSMUSG00000028648,ENSMUSG00000028756,ENSMUSG00000029126,ENSMUSG00000029621,ENSMUSG00000029840,ENSMUSG00000030591,ENSMUSG00000030603,ENSMUSG00000030647,ENSMUSG00000030695,ENSMUSG00000031696,ENSMUSG00000034024,…
1	!	0.00363	930	243	30	0.123	0.032	GO:0070271	BP	1	protein complex biogenesis	1	ENSMUSG00000006932,ENSMUSG00000019831,ENSMUSG00000022682,ENSMUSG00000023020,ENSMUSG00000023094,ENSMUSG00000024248,ENSMUSG00000025868,ENSMUSG00000026245,ENSMUSG00000028070,ENSMUSG00000028552,ENSMUSG00000028648,ENSMUSG00000028756,ENSMUSG00000029126,ENSMUSG00000029621,ENSMUSG00000029840,ENSMUSG00000030591,ENSMUSG00000030603,ENSMUSG00000030647,ENSMUSG00000030695,ENSMUSG00000031696,ENSMUSG00000034024,…
1	!	0.00376	553	243	22	0.091	0.04	GO:0016491	MF	1	oxidoreductase activity	1	ENSMUSG00000000088,ENSMUSG00000000214,ENSMUSG00000002010,ENSMUSG00000020163,ENSMUSG00000021048,ENSMUSG00000021794,ENSMUSG00000023094,ENSMUSG00000024665,ENSMUSG00000024827,ENSMUSG00000024997,ENSMUSG00000025203,ENSMUSG00000025950,ENSMUSG00000028691,ENSMUSG00000030246,ENSMUSG00000035885,ENSMUSG00000044894,ENSMUSG00000051483,ENSMUSG00000059534,ENSMUSG00000059734,ENSMUSG00000063229,ENSMUSG00000073940,…
1	!	0.00414	10915	260	173	0.665	0.016	TF:M00428_0	tf	1	Factor: E2F-1; motif: NKTSSCGC; match class: 0	1	ENSMUSG00000000088,ENSMUSG00000000708,ENSMUSG00000001785,ENSMUSG00000001924,ENSMUSG00000002010,ENSMUSG00000002679,ENSMUSG00000003363,ENSMUSG00000003662,ENSMUSG00000005610,ENSMUSG00000005873,ENSMUSG00000005881,ENSMUSG00000006134,ENSMUSG00000006276,ENSMUSG00000006373,ENSMUSG00000007836,ENSMUSG00000007950,ENSMUSG00000008140,ENSMUSG00000008348,ENSMUSG00000011179,ENSMUSG00000012848,ENSMUSG00000014504,…
1	!	0.00417	10833	260	172	0.662	0.016	TF:M07250_0	tf	1	Factor: E2F-1; motif: NNNSSCGCSAANN; match class: 0	1	ENSMUSG00000000088,ENSMUSG00000000708,ENSMUSG00000001785,ENSMUSG00000002010,ENSMUSG00000003363,ENSMUSG00000003662,ENSMUSG00000005610,ENSMUSG00000005873,ENSMUSG00000005881,ENSMUSG00000006134,ENSMUSG00000006373,ENSMUSG00000006932,ENSMUSG00000007836,ENSMUSG00000007950,ENSMUSG00000008140,ENSMUSG00000008348,ENSMUSG00000011179,ENSMUSG00000013622,ENSMUSG00000014504,ENSMUSG00000014905,ENSMUSG00000016308,…
1	!	0.00424	205	243	13	0.053	0.063	GO:0009141	BP	1	nucleoside triphosphate metabolic process	1	ENSMUSG00000000088,ENSMUSG00000021606,ENSMUSG00000022956,ENSMUSG00000023456,ENSMUSG00000024248,ENSMUSG00000028756,ENSMUSG00000030695,ENSMUSG00000035885,ENSMUSG00000038717,ENSMUSG00000044894,ENSMUSG00000051671,ENSMUSG00000059534,ENSMUSG00000063229
1	!	0.00477	68	243	8	0.033	0.118	GO:0022900	BP	1	electron transport chain	1	ENSMUSG00000000088,ENSMUSG00000021606,ENSMUSG00000027010,ENSMUSG00000028756,ENSMUSG00000035885,ENSMUSG00000044894,ENSMUSG00000051671,ENSMUSG00000059534
1	!	0.00477	68	243	8	0.033	0.118	GO:0022904	BP	1	respiratory electron transport chain	1	ENSMUSG00000000088,ENSMUSG00000021606,ENSMUSG00000027010,ENSMUSG00000028756,ENSMUSG00000035885,ENSMUSG00000044894,ENSMUSG00000051671,ENSMUSG00000059534
1	!	0.00477	68	243	8	0.033	0.118	GO:0006119	BP	1	oxidative phosphorylation	1	ENSMUSG00000000088,ENSMUSG00000021606,ENSMUSG00000024248,ENSMUSG00000028756,ENSMUSG00000035885,ENSMUSG00000044894,ENSMUSG00000051671,ENSMUSG00000059534
1	!	0.00481	9074	260	150	0.577	0.017	TF:M01820_0	tf	1	Factor: CREM; motif: TGACGTCASYN; match class: 0	1	ENSMUSG00000000088,ENSMUSG00000000214,ENSMUSG00000000708,ENSMUSG00000001785,ENSMUSG00000002010,ENSMUSG00000002679,ENSMUSG00000003363,ENSMUSG00000003662,ENSMUSG00000004032,ENSMUSG00000005610,ENSMUSG00000005873,ENSMUSG00000006134,ENSMUSG00000006373,ENSMUSG00000006932,ENSMUSG00000007950,ENSMUSG00000008140,ENSMUSG00000008348,ENSMUSG00000011179,ENSMUSG00000012848,ENSMUSG00000013622,ENSMUSG00000014504,…
1	!	0.00502	796	243	27	0.111	0.034	GO:0098588	CC	1	bounding membrane of organelle	1	ENSMUSG00000000214,ENSMUSG00000001924,ENSMUSG00000006273,ENSMUSG00000013622,ENSMUSG00000018322,ENSMUSG00000019831,ENSMUSG00000020149,ENSMUSG00000020402,ENSMUSG00000024870,ENSMUSG00000027423,ENSMUSG00000028049,ENSMUSG00000028552,ENSMUSG00000028756,ENSMUSG00000029048,ENSMUSG00000029234,ENSMUSG00000030327,ENSMUSG00000030654,ENSMUSG00000031198,ENSMUSG00000031447,ENSMUSG00000031696,ENSMUSG00000033396,…
1	!	0.0054	478	243	20	0.082	0.042	GO:0007005	BP	1	mitochondrion organization	1	ENSMUSG00000018322,ENSMUSG00000020402,ENSMUSG00000021606,ENSMUSG00000022200,ENSMUSG00000022463,ENSMUSG00000023020,ENSMUSG00000024248,ENSMUSG00000024997,ENSMUSG00000025868,ENSMUSG00000028648,ENSMUSG00000028756,ENSMUSG00000030591,ENSMUSG00000030647,ENSMUSG00000031198,ENSMUSG00000031696,ENSMUSG00000037526,ENSMUSG00000038160,ENSMUSG00000059534,ENSMUSG00000059734,ENSMUSG00000070493
1	!	0.00625	662	243	24	0.099	0.036	GO:0043169	MF	1	cation binding	1	ENSMUSG00000002010,ENSMUSG00000018585,ENSMUSG00000021794,ENSMUSG00000023094,ENSMUSG00000024827,ENSMUSG00000025825,ENSMUSG00000025950,ENSMUSG00000027010,ENSMUSG00000028756,ENSMUSG00000029430,ENSMUSG00000031347,ENSMUSG00000031762,ENSMUSG00000031765,ENSMUSG00000034892,ENSMUSG00000036442,ENSMUSG00000037049,ENSMUSG00000037710,ENSMUSG00000037996,ENSMUSG00000051671,ENSMUSG00000053693,ENSMUSG00000060126,…
1	!	0.00677	11569	260	180	0.692	0.016	TF:M02913_0	tf	1	Factor: SP100; motif: NNCGTCGNNTAAWNN; match class: 0	1	ENSMUSG00000000088,ENSMUSG00000000708,ENSMUSG00000001785,ENSMUSG00000002010,ENSMUSG00000002679,ENSMUSG00000002733,ENSMUSG00000003363,ENSMUSG00000003662,ENSMUSG00000004032,ENSMUSG00000005610,ENSMUSG00000006134,ENSMUSG00000006273,ENSMUSG00000006276,ENSMUSG00000006373,ENSMUSG00000006932,ENSMUSG00000007836,ENSMUSG00000007950,ENSMUSG00000008140,ENSMUSG00000008348,ENSMUSG00000011179,ENSMUSG00000014769,…
1	!	0.00745	51	243	7	0.029	0.137	GO:0042773	BP	1	ATP synthesis coupled electron transport	1	ENSMUSG00000000088,ENSMUSG00000021606,ENSMUSG00000028756,ENSMUSG00000035885,ENSMUSG00000044894,ENSMUSG00000051671,ENSMUSG00000059534
1	!	0.0079	4622	260	89	0.342	0.019	TF:M01990_0	tf	1	Factor: ETV3; motif: ANCGGAARYN; match class: 0	1	ENSMUSG00000002679,ENSMUSG00000003363,ENSMUSG00000003662,ENSMUSG00000004032,ENSMUSG00000005881,ENSMUSG00000006276,ENSMUSG00000007836,ENSMUSG00000007950,ENSMUSG00000008348,ENSMUSG00000011179,ENSMUSG00000012848,ENSMUSG00000014504,ENSMUSG00000014905,ENSMUSG00000015090,ENSMUSG00000017754,ENSMUSG00000018322,ENSMUSG00000020163,ENSMUSG00000020720,ENSMUSG00000020952,ENSMUSG00000021038,ENSMUSG00000021606,…
1	!	0.00912	584	243	22	0.091	0.038	GO:0046872	MF	1	metal ion binding	1	ENSMUSG00000002010,ENSMUSG00000018585,ENSMUSG00000023094,ENSMUSG00000025825,ENSMUSG00000025950,ENSMUSG00000027010,ENSMUSG00000028756,ENSMUSG00000029430,ENSMUSG00000031347,ENSMUSG00000031762,ENSMUSG00000031765,ENSMUSG00000034892,ENSMUSG00000036442,ENSMUSG00000037049,ENSMUSG00000037710,ENSMUSG00000037996,ENSMUSG00000051671,ENSMUSG00000053693,ENSMUSG00000060126,ENSMUSG00000071369,ENSMUSG00000074264,…
1	!	0.00988	15968	260	228	0.877	0.014	TF:M07991_1	tf	1	Factor: Hes1; motif: NNCACGYGNN; match class: 1	1	ENSMUSG00000000088,ENSMUSG00000000214,ENSMUSG00000000708,ENSMUSG00000001018,ENSMUSG00000001785,ENSMUSG00000001924,ENSMUSG00000002010,ENSMUSG00000002679,ENSMUSG00000002733,ENSMUSG00000003363,ENSMUSG00000003662,ENSMUSG00000004032,ENSMUSG00000005610,ENSMUSG00000005873,ENSMUSG00000006134,ENSMUSG00000006273,ENSMUSG00000006276,ENSMUSG00000006373,ENSMUSG00000006932,ENSMUSG00000007836,ENSMUSG00000007950,…
1	!	0.0105	4106	260	81	0.312	0.02	TF:M02037_0	tf	1	Factor: Pet-1; motif: ACCGGAARYN; match class: 0	1	ENSMUSG00000002679,ENSMUSG00000003363,ENSMUSG00000003662,ENSMUSG00000004032,ENSMUSG00000005881,ENSMUSG00000007836,ENSMUSG00000008348,ENSMUSG00000011179,ENSMUSG00000012848,ENSMUSG00000014504,ENSMUSG00000015090,ENSMUSG00000016308,ENSMUSG00000017754,ENSMUSG00000018322,ENSMUSG00000020163,ENSMUSG00000020720,ENSMUSG00000020952,ENSMUSG00000021038,ENSMUSG00000021606,ENSMUSG00000021871,ENSMUSG00000022200,…
1	!	0.012	595	230	20	0.087	0.034	MI:hsa-miR-630	mi	1	MI:hsa-miR-630	1	ENSMUSG00000001924,ENSMUSG00000020038,ENSMUSG00000020386,ENSMUSG00000021048,ENSMUSG00000021877,ENSMUSG00000022564,ENSMUSG00000024146,ENSMUSG00000026245,ENSMUSG00000027952,ENSMUSG00000028648,ENSMUSG00000029066,ENSMUSG00000031610,ENSMUSG00000031696,ENSMUSG00000035232,ENSMUSG00000037742,ENSMUSG00000040374,ENSMUSG00000058325,ENSMUSG00000071369,ENSMUSG00000071649,ENSMUSG00000078656
1	!	0.0151	13325	260	199	0.765	0.015	TF:M01752_0	tf	1	Factor: ERG; motif: ACCGGAART; match class: 0	1	ENSMUSG00000000214,ENSMUSG00000000708,ENSMUSG00000001785,ENSMUSG00000002010,ENSMUSG00000002679,ENSMUSG00000002733,ENSMUSG00000003363,ENSMUSG00000003662,ENSMUSG00000004032,ENSMUSG00000005610,ENSMUSG00000005881,ENSMUSG00000006273,ENSMUSG00000006276,ENSMUSG00000006932,ENSMUSG00000007836,ENSMUSG00000007950,ENSMUSG00000008348,ENSMUSG00000011179,ENSMUSG00000012848,ENSMUSG00000014504,ENSMUSG00000014769,…
1	!	0.0156	1269	243	35	0.144	0.028	GO:1901566	BP	1	organonitrogen compound biosynthetic process	1	ENSMUSG00000000214,ENSMUSG00000000708,ENSMUSG00000006932,ENSMUSG00000011179,ENSMUSG00000020477,ENSMUSG00000021048,ENSMUSG00000021794,ENSMUSG00000021877,ENSMUSG00000022200,ENSMUSG00000022261,ENSMUSG00000022336,ENSMUSG00000022956,ENSMUSG00000025290,ENSMUSG00000026245,ENSMUSG00000027170,ENSMUSG00000028234,ENSMUSG00000028756,ENSMUSG00000028773,ENSMUSG00000028937,ENSMUSG00000029066,ENSMUSG00000029234,…
1	!	0.0159	4248	243	82	0.337	0.019	GO:0003824	MF	1	catalytic activity	1	ENSMUSG00000000088,ENSMUSG00000000214,ENSMUSG00000000708,ENSMUSG00000001924,ENSMUSG00000002010,ENSMUSG00000003363,ENSMUSG00000004032,ENSMUSG00000011179,ENSMUSG00000015090,ENSMUSG00000016308,ENSMUSG00000017390,ENSMUSG00000019478,ENSMUSG00000020149,ENSMUSG00000020163,ENSMUSG00000020948,ENSMUSG00000021048,ENSMUSG00000021417,ENSMUSG00000021794,ENSMUSG00000022517,ENSMUSG00000022956,ENSMUSG00000023094,…
1	!	0.0162	7386	260	126	0.485	0.017	TF:M07392_0	tf	1	Factor: Pitx3; motif: GGATTANNNNY; match class: 0	1	ENSMUSG00000000088,ENSMUSG00000000708,ENSMUSG00000001785,ENSMUSG00000002679,ENSMUSG00000003363,ENSMUSG00000005610,ENSMUSG00000005881,ENSMUSG00000006134,ENSMUSG00000007836,ENSMUSG00000008348,ENSMUSG00000012848,ENSMUSG00000013622,ENSMUSG00000014504,ENSMUSG00000015090,ENSMUSG00000016308,ENSMUSG00000017754,ENSMUSG00000018322,ENSMUSG00000018585,ENSMUSG00000018677,ENSMUSG00000019831,ENSMUSG00000020386,…
1	!	0.0166	8539	260	141	0.542	0.017	TF:M02089_1	tf	1	Factor: E2F-3; motif: GGCGGGN; match class: 1	1	ENSMUSG00000000088,ENSMUSG00000000708,ENSMUSG00000001018,ENSMUSG00000001785,ENSMUSG00000002679,ENSMUSG00000002733,ENSMUSG00000003662,ENSMUSG00000005610,ENSMUSG00000005873,ENSMUSG00000005881,ENSMUSG00000006273,ENSMUSG00000006276,ENSMUSG00000006373,ENSMUSG00000006932,ENSMUSG00000007836,ENSMUSG00000007950,ENSMUSG00000008140,ENSMUSG00000011179,ENSMUSG00000013622,ENSMUSG00000014504,ENSMUSG00000014769,…
1	!	0.0191	4	243	3	0.012	0.75	GO:0008121	MF	1	ubiquinol-cytochrome-c reductase activity	1	ENSMUSG00000020163,ENSMUSG00000044894,ENSMUSG00000059534
1	!	0.0191	4	243	3	0.012	0.75	GO:0016681	MF	1	oxidoreductase activity, acting on diphenols and related substances as donors, cytochrome as acceptor	1	ENSMUSG00000020163,ENSMUSG00000044894,ENSMUSG00000059534
1	!	0.0191	4	243	3	0.012	0.75	GO:0016679	MF	1	oxidoreductase activity, acting on diphenols and related substances as donors	1	ENSMUSG00000020163,ENSMUSG00000044894,ENSMUSG00000059534
1	!	0.0199	8721	260	143	0.55	0.016	TF:M00800_0	tf	1	Factor: AP-2; motif: GSCCSCRGGCNRNRNN; match class: 0	1	ENSMUSG00000000214,ENSMUSG00000000708,ENSMUSG00000001018,ENSMUSG00000002010,ENSMUSG00000002733,ENSMUSG00000003363,ENSMUSG00000003662,ENSMUSG00000005610,ENSMUSG00000006932,ENSMUSG00000007836,ENSMUSG00000007950,ENSMUSG00000008140,ENSMUSG00000008348,ENSMUSG00000011179,ENSMUSG00000013622,ENSMUSG00000015090,ENSMUSG00000016308,ENSMUSG00000017390,ENSMUSG00000017754,ENSMUSG00000018585,ENSMUSG00000018677,…
1	!	0.0246	2942	243	62	0.255	0.021	GO:0006996	BP	1	organelle organization	1	ENSMUSG00000000708,ENSMUSG00000001018,ENSMUSG00000001785,ENSMUSG00000006932,ENSMUSG00000016308,ENSMUSG00000018322,ENSMUSG00000019831,ENSMUSG00000020149,ENSMUSG00000020290,ENSMUSG00000020402,ENSMUSG00000020952,ENSMUSG00000021606,ENSMUSG00000022105,ENSMUSG00000022200,ENSMUSG00000022463,ENSMUSG00000022682,ENSMUSG00000023020,ENSMUSG00000023094,ENSMUSG00000024146,ENSMUSG00000024248,ENSMUSG00000024870,…
1	!	0.0247	2248	260	51	0.196	0.023	TF:M07360_1	tf	1	Factor: LRH-1; motif: NNNYCAAGGYCAN; match class: 1	1	ENSMUSG00000002679,ENSMUSG00000006273,ENSMUSG00000008140,ENSMUSG00000014905,ENSMUSG00000018677,ENSMUSG00000020477,ENSMUSG00000021339,ENSMUSG00000022450,ENSMUSG00000022517,ENSMUSG00000022682,ENSMUSG00000023861,ENSMUSG00000024158,ENSMUSG00000024827,ENSMUSG00000024997,ENSMUSG00000025290,ENSMUSG00000025362,ENSMUSG00000025825,ENSMUSG00000026424,ENSMUSG00000028234,ENSMUSG00000028495,ENSMUSG00000028552,…
1	!	0.025	6920	260	119	0.458	0.017	TF:M01752_1	tf	1	Factor: ERG; motif: ACCGGAART; match class: 1	1	ENSMUSG00000000708,ENSMUSG00000001785,ENSMUSG00000002010,ENSMUSG00000002679,ENSMUSG00000003363,ENSMUSG00000003662,ENSMUSG00000004032,ENSMUSG00000005610,ENSMUSG00000005881,ENSMUSG00000008348,ENSMUSG00000011179,ENSMUSG00000012848,ENSMUSG00000014504,ENSMUSG00000014769,ENSMUSG00000014905,ENSMUSG00000015090,ENSMUSG00000016308,ENSMUSG00000016344,ENSMUSG00000017754,ENSMUSG00000018322,ENSMUSG00000018585,…
1	!	0.0268	6706	260	116	0.446	0.017	TF:M00976_0	tf	1	Factor: AhR,; motif: NRCGTGNGN; match class: 0	1	ENSMUSG00000001924,ENSMUSG00000002010,ENSMUSG00000004032,ENSMUSG00000005610,ENSMUSG00000005873,ENSMUSG00000005881,ENSMUSG00000006134,ENSMUSG00000006932,ENSMUSG00000007836,ENSMUSG00000007950,ENSMUSG00000008140,ENSMUSG00000011179,ENSMUSG00000012848,ENSMUSG00000014504,ENSMUSG00000015090,ENSMUSG00000016308,ENSMUSG00000016344,ENSMUSG00000017390,ENSMUSG00000017754,ENSMUSG00000018677,ENSMUSG00000020038,…
1	!	0.0277	11688	260	179	0.688	0.015	TF:M01977_0	tf	1	Factor: ESE-1; motif: NSMGGAARYN; match class: 0	1	ENSMUSG00000000214,ENSMUSG00000000708,ENSMUSG00000001785,ENSMUSG00000002679,ENSMUSG00000002733,ENSMUSG00000003363,ENSMUSG00000003662,ENSMUSG00000004032,ENSMUSG00000005610,ENSMUSG00000005873,ENSMUSG00000005881,ENSMUSG00000006373,ENSMUSG00000006932,ENSMUSG00000007836,ENSMUSG00000008348,ENSMUSG00000011179,ENSMUSG00000012848,ENSMUSG00000014504,ENSMUSG00000014769,ENSMUSG00000014905,ENSMUSG00000015090,…
1	!	0.0279	4145	260	80	0.308	0.019	TF:M01078_1	tf	1	Factor: c-Ets-1; motif: NNNRCCGGAWRYNNNN; match class: 1	1	ENSMUSG00000002679,ENSMUSG00000002733,ENSMUSG00000003363,ENSMUSG00000004032,ENSMUSG00000005881,ENSMUSG00000007836,ENSMUSG00000007950,ENSMUSG00000008348,ENSMUSG00000011179,ENSMUSG00000012848,ENSMUSG00000014504,ENSMUSG00000014769,ENSMUSG00000014905,ENSMUSG00000015090,ENSMUSG00000017754,ENSMUSG00000018322,ENSMUSG00000018585,ENSMUSG00000020163,ENSMUSG00000020720,ENSMUSG00000020948,ENSMUSG00000021038,…
1	!	0.0288	3609	260	72	0.277	0.02	TF:M00430_1	tf	1	Factor: E2F-1; motif: NTTSGCGG; match class: 1	1	ENSMUSG00000000088,ENSMUSG00000002679,ENSMUSG00000003662,ENSMUSG00000005610,ENSMUSG00000005873,ENSMUSG00000006134,ENSMUSG00000006373,ENSMUSG00000006932,ENSMUSG00000011179,ENSMUSG00000014769,ENSMUSG00000018322,ENSMUSG00000019831,ENSMUSG00000020149,ENSMUSG00000020290,ENSMUSG00000020720,ENSMUSG00000021038,ENSMUSG00000021048,ENSMUSG00000021076,ENSMUSG00000021339,ENSMUSG00000021610,ENSMUSG00000022105,…
1	!	0.0301	1594	243	40	0.165	0.025	GO:0051649	BP	1	establishment of localization in cell	1	ENSMUSG00000001018,ENSMUSG00000005881,ENSMUSG00000006932,ENSMUSG00000018322,ENSMUSG00000018585,ENSMUSG00000018677,ENSMUSG00000020149,ENSMUSG00000020290,ENSMUSG00000021038,ENSMUSG00000021339,ENSMUSG00000021917,ENSMUSG00000022463,ENSMUSG00000022517,ENSMUSG00000022956,ENSMUSG00000023861,ENSMUSG00000024870,ENSMUSG00000027010,ENSMUSG00000027423,ENSMUSG00000028049,ENSMUSG00000028552,ENSMUSG00000028691,…
1	!	0.0305	408	59	18	0.305	0.044	HP:0001877	hp	1	Abnormality of erythrocytes	1	ENSMUSG00000020386,ENSMUSG00000021871,ENSMUSG00000023020,ENSMUSG00000023456,ENSMUSG00000024146,ENSMUSG00000024789,ENSMUSG00000025290,ENSMUSG00000025362,ENSMUSG00000025825,ENSMUSG00000025950,ENSMUSG00000030695,ENSMUSG00000034892,ENSMUSG00000035202,ENSMUSG00000037049,ENSMUSG00000041763,ENSMUSG00000052146,ENSMUSG00000073940,ENSMUSG00000088088
1	!	0.0308	2578	260	56	0.215	0.022	TF:M07248_1	tf	1	Factor: CREB1; motif: NNNNTGACGTNANNN; match class: 1	1	ENSMUSG00000001785,ENSMUSG00000002010,ENSMUSG00000002733,ENSMUSG00000003363,ENSMUSG00000005610,ENSMUSG00000005873,ENSMUSG00000005881,ENSMUSG00000006134,ENSMUSG00000006373,ENSMUSG00000008140,ENSMUSG00000008348,ENSMUSG00000012848,ENSMUSG00000018677,ENSMUSG00000021610,ENSMUSG00000021877,ENSMUSG00000022200,ENSMUSG00000022749,ENSMUSG00000023094,ENSMUSG00000023150,ENSMUSG00000024870,ENSMUSG00000024926,…
1	!	0.0328	3824	260	75	0.288	0.02	TF:M01985_0	tf	1	Factor: ERG; motif: ACCGGAARYN; match class: 0	1	ENSMUSG00000002010,ENSMUSG00000002679,ENSMUSG00000003363,ENSMUSG00000003662,ENSMUSG00000004032,ENSMUSG00000005881,ENSMUSG00000007836,ENSMUSG00000008348,ENSMUSG00000011179,ENSMUSG00000012848,ENSMUSG00000014504,ENSMUSG00000014905,ENSMUSG00000015090,ENSMUSG00000016308,ENSMUSG00000018322,ENSMUSG00000018585,ENSMUSG00000020163,ENSMUSG00000020720,ENSMUSG00000021038,ENSMUSG00000021606,ENSMUSG00000021871,…
1	!	0.0359	12751	260	191	0.735	0.015	TF:M02844_1	tf	1	Factor: BCL6B; motif: NNNNCCGCCCCWNNNN; match class: 1	1	ENSMUSG00000000708,ENSMUSG00000001018,ENSMUSG00000001785,ENSMUSG00000001924,ENSMUSG00000002010,ENSMUSG00000002679,ENSMUSG00000002733,ENSMUSG00000003363,ENSMUSG00000003662,ENSMUSG00000005610,ENSMUSG00000005873,ENSMUSG00000005881,ENSMUSG00000006134,ENSMUSG00000006276,ENSMUSG00000006373,ENSMUSG00000006932,ENSMUSG00000007836,ENSMUSG00000007950,ENSMUSG00000008140,ENSMUSG00000008348,ENSMUSG00000011179,…
1	!	0.0366	836	243	26	0.107	0.031	GO:1901135	BP	1	carbohydrate derivative metabolic process	1	ENSMUSG00000000088,ENSMUSG00000000708,ENSMUSG00000006932,ENSMUSG00000017390,ENSMUSG00000020149,ENSMUSG00000021606,ENSMUSG00000021877,ENSMUSG00000022200,ENSMUSG00000022261,ENSMUSG00000022956,ENSMUSG00000023456,ENSMUSG00000024248,ENSMUSG00000024870,ENSMUSG00000028756,ENSMUSG00000028937,ENSMUSG00000029234,ENSMUSG00000030695,ENSMUSG00000035885,ENSMUSG00000038717,ENSMUSG00000039530,ENSMUSG00000044894,…
1	!	0.0377	10248	260	161	0.619	0.016	TF:M01078_0	tf	1	Factor: c-Ets-1; motif: NNNRCCGGAWRYNNNN; match class: 0	1	ENSMUSG00000000708,ENSMUSG00000002010,ENSMUSG00000002679,ENSMUSG00000002733,ENSMUSG00000003363,ENSMUSG00000003662,ENSMUSG00000004032,ENSMUSG00000005610,ENSMUSG00000005881,ENSMUSG00000006134,ENSMUSG00000006276,ENSMUSG00000006932,ENSMUSG00000007836,ENSMUSG00000007950,ENSMUSG00000008348,ENSMUSG00000011179,ENSMUSG00000012848,ENSMUSG00000014504,ENSMUSG00000014769,ENSMUSG00000014905,ENSMUSG00000015090,…
1	!	0.0378	17684	260	243	0.935	0.014	TF:M00327_0	tf	1	Factor: Pax-3; motif: NNNNNNCGTCACGSTYNNNNN; match class: 0	1	ENSMUSG00000000088,ENSMUSG00000000214,ENSMUSG00000000708,ENSMUSG00000001018,ENSMUSG00000001785,ENSMUSG00000001924,ENSMUSG00000002010,ENSMUSG00000002679,ENSMUSG00000002733,ENSMUSG00000003363,ENSMUSG00000003662,ENSMUSG00000004032,ENSMUSG00000005610,ENSMUSG00000005873,ENSMUSG00000005881,ENSMUSG00000006134,ENSMUSG00000006273,ENSMUSG00000006276,ENSMUSG00000006373,ENSMUSG00000006932,ENSMUSG00000007836,…
1	!	0.0379	455	243	18	0.074	0.04	GO:0043623	BP	1	cellular protein complex assembly	1	ENSMUSG00000019831,ENSMUSG00000023020,ENSMUSG00000023094,ENSMUSG00000024248,ENSMUSG00000025868,ENSMUSG00000028552,ENSMUSG00000028648,ENSMUSG00000029126,ENSMUSG00000029621,ENSMUSG00000029840,ENSMUSG00000030591,ENSMUSG00000030647,ENSMUSG00000034024,ENSMUSG00000051671,ENSMUSG00000059325,ENSMUSG00000059534,ENSMUSG00000059734,ENSMUSG00000075706
1	!	0.0401	2692	59	55	0.932	0.02	HP:0000707	hp	1	Abnormality of the nervous system	1	ENSMUSG00000000214,ENSMUSG00000001924,ENSMUSG00000006134,ENSMUSG00000006273,ENSMUSG00000006932,ENSMUSG00000020386,ENSMUSG00000021038,ENSMUSG00000021606,ENSMUSG00000021794,ENSMUSG00000021871,ENSMUSG00000022105,ENSMUSG00000023020,ENSMUSG00000023456,ENSMUSG00000023861,ENSMUSG00000024146,ENSMUSG00000024789,ENSMUSG00000024827,ENSMUSG00000025290,ENSMUSG00000025362,ENSMUSG00000025950,ENSMUSG00000027010,…
1	!	0.0414	2605	260	56	0.215	0.021	TF:M07034_1	tf	1	Factor: ATF-1; motif: NNNTGACGTNNN; match class: 1	1	ENSMUSG00000001785,ENSMUSG00000002010,ENSMUSG00000002733,ENSMUSG00000003363,ENSMUSG00000003662,ENSMUSG00000005610,ENSMUSG00000005873,ENSMUSG00000006373,ENSMUSG00000008140,ENSMUSG00000008348,ENSMUSG00000012848,ENSMUSG00000018677,ENSMUSG00000021610,ENSMUSG00000021877,ENSMUSG00000022200,ENSMUSG00000022749,ENSMUSG00000023094,ENSMUSG00000023150,ENSMUSG00000024870,ENSMUSG00000024926,ENSMUSG00000025203,…
1	!	0.0433	10350	260	162	0.623	0.016	TF:M00196_0	tf	1	Factor: Sp1; motif: NGGGGGCGGGGYN; match class: 0	1	ENSMUSG00000000708,ENSMUSG00000001018,ENSMUSG00000001785,ENSMUSG00000002010,ENSMUSG00000002679,ENSMUSG00000002733,ENSMUSG00000003662,ENSMUSG00000005610,ENSMUSG00000005873,ENSMUSG00000005881,ENSMUSG00000006273,ENSMUSG00000006276,ENSMUSG00000006373,ENSMUSG00000006932,ENSMUSG00000007836,ENSMUSG00000007950,ENSMUSG00000008140,ENSMUSG00000008348,ENSMUSG00000011179,ENSMUSG00000013622,ENSMUSG00000014504,…
1	!	0.0474	376	243	16	0.066	0.043	GO:0050839	MF	1	cell adhesion molecule binding	1	ENSMUSG00000006134,ENSMUSG00000006276,ENSMUSG00000006932,ENSMUSG00000020149,ENSMUSG00000022336,ENSMUSG00000025362,ENSMUSG00000025950,ENSMUSG00000027423,ENSMUSG00000028552,ENSMUSG00000028691,ENSMUSG00000029247,ENSMUSG00000029430,ENSMUSG00000030695,ENSMUSG00000063229,ENSMUSG00000074403,ENSMUSG00000098274
#INFO:	PARAMETERS: organism = mmusculus
#INFO:	PARAMETERS: user_thr = 1.00
#INFO:	PARAMETERS: analytical = 1
#INFO:	PARAMETERS: significant = 1
#INFO:	User: http
#INFO:	Host: arak-prod
#INFO:	Time: 2018-2-27 4:3:14
#INFO:	Version: r1741_e90_eg37
#WARNING:	Gene ENSMUSG00000108585 in query [1/278] is not recognized, skipping!
#INFO:	Effective domain size for GO_NOIEA: 19778, threshold 1.9e-05
#INFO:	Effective domain size for HP_NOIEA: 3747, threshold 4.9e-05
#INFO:	Effective domain size for KEGG_NOIEA: 7853, threshold 0.000585
#INFO:	Effective domain size for MI_NOIEA: 18988, threshold 0.000167
#INFO:	Effective domain size for REAC_NOIEA: 8939, threshold 0.00017
#INFO:	Effective domain size for TF_NOIEA: 20745, threshold 3.9e-05
#INFO:
#INFO:	--- Gene names and descriptions
#INFO:
#INFO:	QUERY:	ENSMUSG00000014769	PSMB1	proteasome (prosome, macropain) subunit, beta type 1 [Source:MGI Symbol;Acc:MGI:104884]
#INFO:	QUERY:	ENSMUSG00000025950	IDH1	isocitrate dehydrogenase 1 (NADP+), soluble [Source:MGI Symbol;Acc:MGI:96413]
#INFO:	QUERY:	ENSMUSG00000019831	WASF1	WAS protein family, member 1 [Source:MGI Symbol;Acc:MGI:1890563]
#INFO:	QUERY:	ENSMUSG00000020386	SAR1B	secretion associated Ras related GTPase 1B [Source:MGI Symbol;Acc:MGI:1913647]
#INFO:	QUERY:	ENSMUSG00000029430	RAN	RAN, member RAS oncogene family [Source:MGI Symbol;Acc:MGI:1333112]
#INFO:	QUERY:	ENSMUSG00000090083	RNF8	ring finger protein 8 [Source:MGI Symbol;Acc:MGI:1929069]
#INFO:	QUERY:	ENSMUSG00000011179	ODC1	ornithine decarboxylase, structural 1 [Source:MGI Symbol;Acc:MGI:97402]
#INFO:	QUERY:	ENSMUSG00000020149	RAB1A	RAB1A, member RAS oncogene family [Source:MGI Symbol;Acc:MGI:97842]
#INFO:	QUERY:	ENSMUSG00000064373	SELENOP	selenoprotein P [Source:MGI Symbol;Acc:MGI:894288]
#INFO:	QUERY:	ENSMUSG00000030647	NDUFC2	NADH dehydrogenase (ubiquinone) 1, subcomplex unknown, 2 [Source:MGI Symbol;Acc:MGI:1344370]
#INFO:	QUERY:	ENSMUSG00000002010	IDH3G	isocitrate dehydrogenase 3 (NAD+), gamma [Source:MGI Symbol;Acc:MGI:1099463]
#INFO:	QUERY:	ENSMUSG00000089617	SCARNA10	small Cajal body-specific RNA 10 [Source:MGI Symbol;Acc:MGI:3819482]
#INFO:	QUERY:	ENSMUSG00000032184	LYSMD2	LysM, putative peptidoglycan-binding, domain containing 2 [Source:MGI Symbol;Acc:MGI:1917332]
#INFO:	QUERY:	ENSMUSG00000024158	HAGH	hydroxyacyl glutathione hydrolase [Source:MGI Symbol;Acc:MGI:95745]
#INFO:	QUERY:	ENSMUSG00000060126	TPT1	tumor protein, translationally-controlled 1 [Source:MGI Symbol;Acc:MGI:104890]
#INFO:	QUERY:	ENSMUSG00000028756	PINK1	PTEN induced putative kinase 1 [Source:MGI Symbol;Acc:MGI:1916193]
#INFO:	QUERY:	ENSMUSG00000026018	ICA1L	islet cell autoantigen 1-like [Source:MGI Symbol;Acc:MGI:1917625]
#INFO:	QUERY:	ENSMUSG00000029840	MTPN	myotrophin [Source:MGI Symbol;Acc:MGI:99445]
#INFO:	QUERY:	ENSMUSG00000023861	MPC1	mitochondrial pyruvate carrier 1 [Source:MGI Symbol;Acc:MGI:1915240]
#INFO:	QUERY:	ENSMUSG00000061666	GDPD1	glycerophosphodiester phosphodiesterase domain containing 1 [Source:MGI Symbol;Acc:MGI:1913819]
#INFO:	QUERY:	ENSMUSG00000027423	SNX5	sorting nexin 5 [Source:MGI Symbol;Acc:MGI:1916428]
#INFO:	QUERY:	ENSMUSG00000023150	IVNS1ABP	influenza virus NS1A binding protein [Source:MGI Symbol;Acc:MGI:2152389]
#INFO:	QUERY:	ENSMUSG00000003363	PLD3	phospholipase D family, member 3 [Source:MGI Symbol;Acc:MGI:1333782]
#INFO:	QUERY:	ENSMUSG00000071866	PPIA	peptidylprolyl isomerase A [Source:MGI Symbol;Acc:MGI:97749]
#INFO:	QUERY:	ENSMUSG00000022682	RRN3	RRN3 RNA polymerase I transcription factor homolog (yeast) [Source:MGI Symbol;Acc:MGI:1925255]
#INFO:	QUERY:	ENSMUSG00000041231	UBLCP1	ubiquitin-like domain containing CTD phosphatase 1 [Source:MGI Symbol;Acc:MGI:1933105]
#INFO:	QUERY:	ENSMUSG00000071369	MAP3K5	mitogen-activated protein kinase kinase kinase 5 [Source:MGI Symbol;Acc:MGI:1346876]
#INFO:	QUERY:	ENSMUSG00000022450	NDUFA6	NADH dehydrogenase (ubiquinone) 1 alpha subcomplex, 6 (B14) [Source:MGI Symbol;Acc:MGI:1914380]
#INFO:	QUERY:	ENSMUSG00000028937	ACOT7	acyl-CoA thioesterase 7 [Source:MGI Symbol;Acc:MGI:1917275]
#INFO:	QUERY:	ENSMUSG00000014905	DNAJB9	DnaJ heat shock protein family (Hsp40) member B9 [Source:MGI Symbol;Acc:MGI:1351618]
#INFO:	QUERY:	ENSMUSG00000033885	PXK	PX domain containing serine/threonine kinase [Source:MGI Symbol;Acc:MGI:1289230]
#INFO:	QUERY:	ENSMUSG00000020038	CRY1	cryptochrome 1 (photolyase-like) [Source:MGI Symbol;Acc:MGI:1270841]
#INFO:	QUERY:	ENSMUSG00000060002	CHPT1	choline phosphotransferase 1 [Source:MGI Symbol;Acc:MGI:2384841]
#INFO:	QUERY:	ENSMUSG00000071650	GANAB	alpha glucosidase 2 alpha neutral subunit [Source:MGI Symbol;Acc:MGI:1097667]
#INFO:	QUERY:	ENSMUSG00000093989	RNASEK	ribonuclease, RNase K [Source:MGI Symbol;Acc:MGI:106369]
#INFO:	QUERY:	ENSMUSG00000028552	EPS15	epidermal growth factor receptor pathway substrate 15 [Source:MGI Symbol;Acc:MGI:104583]
#INFO:	QUERY:	ENSMUSG00000033972	ZFP944	zinc finger protein 944 [Source:MGI Symbol;Acc:MGI:2442394]
#INFO:	QUERY:	ENSMUSG00000030246	LDHB	lactate dehydrogenase B [Source:MGI Symbol;Acc:MGI:96763]
#INFO:	QUERY:	ENSMUSG00000020163	UQCR11	ubiquinol-cytochrome c reductase, complex III subunit XI [Source:MGI Symbol;Acc:MGI:1913844]
#INFO:	QUERY:	ENSMUSG00000028049	SCAMP3	secretory carrier membrane protein 3 [Source:MGI Symbol;Acc:MGI:1346346]
#INFO:	QUERY:	ENSMUSG00000041763	TPP2	tripeptidyl peptidase II [Source:MGI Symbol;Acc:MGI:102724]
#INFO:	QUERY:	ENSMUSG00000027574	NKAIN4	Na+/K+ transporting ATPase interacting 4 [Source:MGI Symbol;Acc:MGI:1915372]
#INFO:	QUERY:	ENSMUSG00000070493	CHCHD2	coiled-coil-helix-coiled-coil-helix domain containing 2 [Source:MGI Symbol;Acc:MGI:1261428]
#INFO:	QUERY:	ENSMUSG00000004032	GSTM5	glutathione S-transferase, mu 5 [Source:MGI Symbol;Acc:MGI:1309466]
#INFO:	QUERY:	ENSMUSG00000037996	SLC24A2	solute carrier family 24 (sodium/potassium/calcium exchanger), member 2 [Source:MGI Symbol;Acc:MGI:1923626]
#INFO:	QUERY:	ENSMUSG00000031021	TMEM9B	TMEM9 domain family, member B [Source:MGI Symbol;Acc:MGI:1915254]
#INFO:	QUERY:	ENSMUSG00000040374	PEX2	peroxisomal biogenesis factor 2 [Source:MGI Symbol;Acc:MGI:107486]
#INFO:	QUERY:	ENSMUSG00000001924	UBA1	ubiquitin-like modifier activating enzyme 1 [Source:MGI Symbol;Acc:MGI:98890]
#INFO:	QUERY:	ENSMUSG00000028234	RPS20	ribosomal protein S20 [Source:MGI Symbol;Acc:MGI:1914677]
#INFO:	QUERY:	ENSMUSG00000024829	MRPL21	mitochondrial ribosomal protein L21 [Source:MGI Symbol;Acc:MGI:2660674]
#INFO:	QUERY:	ENSMUSG00000003662	CIAO1	cytosolic iron-sulfur protein assembly 1 [Source:MGI Symbol;Acc:MGI:1346998]
#INFO:	QUERY:	ENSMUSG00000039530	TUSC3	tumor suppressor candidate 3 [Source:MGI Symbol;Acc:MGI:1933134]
#INFO:	QUERY:	ENSMUSG00000022105	RB1	RB transcriptional corepressor 1 [Source:MGI Symbol;Acc:MGI:97874]
#INFO:	QUERY:	ENSMUSG00000028833	NCDN	neurochondrin [Source:MGI Symbol;Acc:MGI:1347351]
#INFO:	QUERY:	ENSMUSG00000034024	CCT2	chaperonin containing Tcp1, subunit 2 (beta) [Source:MGI Symbol;Acc:MGI:107186]
#INFO:	QUERY:	ENSMUSG00000053693	MAST1	microtubule associated serine/threonine kinase 1 [Source:MGI Symbol;Acc:MGI:1861901]
#INFO:	QUERY:	ENSMUSG00000031770	HERPUD1	homocysteine-inducible, endoplasmic reticulum stress-inducible, ubiquitin-like domain member 1 [Source:MGI Symbol;Acc:MGI:1927406]
#INFO:	QUERY:	ENSMUSG00000034432	COPS8	COP9 signalosome subunit 8 [Source:MGI Symbol;Acc:MGI:1915363]
#INFO:	QUERY:	ENSMUSG00000078656	VPS25	vacuolar protein sorting 25 [Source:MGI Symbol;Acc:MGI:106354]
#INFO:	QUERY:	ENSMUSG00000000708	KAT2B	K(lysine) acetyltransferase 2B [Source:MGI Symbol;Acc:MGI:1343094]
#INFO:	QUERY:	ENSMUSG00000031703	ITFG1	integrin alpha FG-GAP repeat containing 1 [Source:MGI Symbol;Acc:MGI:106419]
#INFO:	QUERY:	ENSMUSG00000025781	ATP5C1	ATP synthase, H+ transporting, mitochondrial F1 complex, gamma polypeptide 1 [Source:MGI Symbol;Acc:MGI:1261437]
#INFO:	QUERY:	ENSMUSG00000052981	UBE2QL1	ubiquitin-conjugating enzyme E2Q family-like 1 [Source:MGI Symbol;Acc:MGI:1924230]
#INFO:	QUERY:	ENSMUSG00000006932	CTNNB1	catenin (cadherin associated protein), beta 1 [Source:MGI Symbol;Acc:MGI:88276]
#INFO:	QUERY:	ENSMUSG00000024789	JAK2	Janus kinase 2 [Source:MGI Symbol;Acc:MGI:96629]
#INFO:	QUERY:	ENSMUSG00000038736	NUDCD1	NudC domain containing 1 [Source:MGI Symbol;Acc:MGI:1914679]
#INFO:	QUERY:	ENSMUSG00000031765	MT1	metallothionein 1 [Source:MGI Symbol;Acc:MGI:97171]
#INFO:	QUERY:	ENSMUSG00000022749	TBC1D23	TBC1 domain family, member 23 [Source:MGI Symbol;Acc:MGI:1914831]
#INFO:	QUERY:	ENSMUSG00000007950	ABHD8	abhydrolase domain containing 8 [Source:MGI Symbol;Acc:MGI:1918946]
#INFO:	QUERY:	ENSMUSG00000026424	GPR37L1	G protein-coupled receptor 37-like 1 [Source:MGI Symbol;Acc:MGI:1928503]
#INFO:	QUERY:	ENSMUSG00000017390	ALDOC	aldolase C, fructose-bisphosphate [Source:MGI Symbol;Acc:MGI:101863]
#INFO:	QUERY:	ENSMUSG00000024387	CSNK2B	casein kinase 2, beta polypeptide [Source:MGI Symbol;Acc:MGI:88548]
#INFO:	QUERY:	ENSMUSG00000029621	ARPC1A	actin related protein 2/3 complex, subunit 1A [Source:MGI Symbol;Acc:MGI:1928896]
#INFO:	QUERY:	ENSMUSG00000029030	TPRGL	transformation related protein 63 regulated like [Source:MGI Symbol;Acc:MGI:1915058]
#INFO:	QUERY:	ENSMUSG00000031672	GOT2	glutamatic-oxaloacetic transaminase 2, mitochondrial [Source:MGI Symbol;Acc:MGI:95792]
#INFO:	QUERY:	ENSMUSG00000027952	PMVK	phosphomevalonate kinase [Source:MGI Symbol;Acc:MGI:1915853]
#INFO:	QUERY:	ENSMUSG00000018322	TOMM34	translocase of outer mitochondrial membrane 34 [Source:MGI Symbol;Acc:MGI:1914395]
#INFO:	QUERY:	ENSMUSG00000022336	EIF3E	eukaryotic translation initiation factor 3, subunit E [Source:MGI Symbol;Acc:MGI:99257]
#INFO:	QUERY:	ENSMUSG00000030603	PSMC4	proteasome (prosome, macropain) 26S subunit, ATPase, 4 [Source:MGI Symbol;Acc:MGI:1346093]
#INFO:	QUERY:	ENSMUSG00000030695	ALDOA	aldolase A, fructose-bisphosphate [Source:MGI Symbol;Acc:MGI:87994]
#INFO:	QUERY:	ENSMUSG00000028969	CDK5	cyclin-dependent kinase 5 [Source:MGI Symbol;Acc:MGI:101765]
#INFO:	QUERY:	ENSMUSG00000016308	UBE2A	ubiquitin-conjugating enzyme E2A [Source:MGI Symbol;Acc:MGI:102959]
#INFO:	QUERY:	ENSMUSG00000061724	GM2423	predicted gene 2423 [Source:MGI Symbol;Acc:MGI:3805957]
#INFO:	QUERY:	ENSMUSG00000026204	PTPRN	protein tyrosine phosphatase, receptor type, N [Source:MGI Symbol;Acc:MGI:102765]
#INFO:	QUERY:	ENSMUSG00000014504	SRP19	signal recognition particle 19 [Source:MGI Symbol;Acc:MGI:1913634]
#INFO:	QUERY:	ENSMUSG00000027822	SLC33A1	solute carrier family 33 (acetyl-CoA transporter), member 1 [Source:MGI Symbol;Acc:MGI:1332247]
#INFO:	QUERY:	ENSMUSG00000029580	ACTB	actin, beta [Source:MGI Symbol;Acc:MGI:87904]
#INFO:	QUERY:	ENSMUSG00000059534	UQCR10	ubiquinol-cytochrome c reductase, complex III subunit X [Source:MGI Symbol;Acc:MGI:1913402]
#INFO:	QUERY:	ENSMUSG00000027712	ANXA5	annexin A5 [Source:MGI Symbol;Acc:MGI:106008]
#INFO:	QUERY:	ENSMUSG00000007836	HNRNPA0	heterogeneous nuclear ribonucleoprotein A0 [Source:MGI Symbol;Acc:MGI:1924384]
#INFO:	QUERY:	ENSMUSG00000020720	PSMD12	proteasome (prosome, macropain) 26S subunit, non-ATPase, 12 [Source:MGI Symbol;Acc:MGI:1914247]
#INFO:	QUERY:	ENSMUSG00000022463	SREBF2	sterol regulatory element binding factor 2 [Source:MGI Symbol;Acc:MGI:107585]
#INFO:	QUERY:	ENSMUSG00000050373	SNX21	sorting nexin family member 21 [Source:MGI Symbol;Acc:MGI:1917729]
#INFO:	QUERY:	ENSMUSG00000018677	SLC25A39	solute carrier family 25, member 39 [Source:MGI Symbol;Acc:MGI:1196386]
#INFO:	QUERY:	ENSMUSG00000024248	COX7A2L	cytochrome c oxidase subunit VIIa polypeptide 2-like [Source:MGI Symbol;Acc:MGI:106015]
#INFO:	QUERY:	ENSMUSG00000031696	VPS35	VPS35 retromer complex component [Source:MGI Symbol;Acc:MGI:1890467]
#INFO:	QUERY:	ENSMUSG00000021877	ARF4	ADP-ribosylation factor 4 [Source:MGI Symbol;Acc:MGI:99433]
#INFO:	QUERY:	ENSMUSG00000000088	COX5A	cytochrome c oxidase subunit Va [Source:MGI Symbol;Acc:MGI:88474]
#INFO:	QUERY:	ENSMUSG00000033917	GDE1	glycerophosphodiester phosphodiesterase 1 [Source:MGI Symbol;Acc:MGI:1891827]
#INFO:	QUERY:	ENSMUSG00000017754	PLTP	phospholipid transfer protein [Source:MGI Symbol;Acc:MGI:103151]
#INFO:	QUERY:	ENSMUSG00000029126	NSG1	neuron specific gene family member 1 [Source:MGI Symbol;Acc:MGI:109149]
#INFO:	QUERY:	ENSMUSG00000024926	KAT5	K(lysine) acetyltransferase 5 [Source:MGI Symbol;Acc:MGI:1932051]
#INFO:	QUERY:	ENSMUSG00000030774	PAK1	p21 protein (Cdc42/Rac)-activated kinase 1 [Source:MGI Symbol;Acc:MGI:1339975]
#INFO:	QUERY:	ENSMUSG00000021048	MTHFD1	methylenetetrahydrofolate dehydrogenase (NADP+ dependent), methenyltetrahydrofolate cyclohydrolase, formyltetrahydrofolate synthase [Source:MGI Symbol;Acc:MGI:1342005]
#INFO:	QUERY:	ENSMUSG00000027010	SLC25A12	solute carrier family 25 (mitochondrial carrier, Aralar), member 12 [Source:MGI Symbol;Acc:MGI:1926080]
#INFO:	QUERY:	ENSMUSG00000035765	DYM	dymeclin [Source:MGI Symbol;Acc:MGI:1918480]
#INFO:	QUERY:	ENSMUSG00000020585	LAPTM4A	lysosomal-associated protein transmembrane 4A [Source:MGI Symbol;Acc:MGI:108017]
#INFO:	QUERY:	ENSMUSG00000047187	RAB2A	RAB2A, member RAS oncogene family [Source:MGI Symbol;Acc:MGI:1928750]
#INFO:	QUERY:	ENSMUSG00000023020	COX14	cytochrome c oxidase assembly protein 14 [Source:MGI Symbol;Acc:MGI:1913629]
#INFO:	QUERY:	ENSMUSG00000027167	ELP4	elongator acetyltransferase complex subunit 4 [Source:MGI Symbol;Acc:MGI:1925016]
#INFO:	QUERY:	ENSMUSG00000029432	NIPSNAP2	nipsnap homolog 2 [Source:MGI Symbol;Acc:MGI:1278343]
#INFO:	QUERY:	ENSMUSG00000041697	COX6A1	cytochrome c oxidase subunit VIa polypeptide 1 [Source:MGI Symbol;Acc:MGI:103099]
#INFO:	QUERY:	ENSMUSG00000033396	SPG11	SPG11, spatacsin vesicle trafficking associated [Source:MGI Symbol;Acc:MGI:2444989]
#INFO:	QUERY:	ENSMUSG00000024997	PRDX3	peroxiredoxin 3 [Source:MGI Symbol;Acc:MGI:88034]
#INFO:	QUERY:	ENSMUSG00000026385	DBI	diazepam binding inhibitor [Source:MGI Symbol;Acc:MGI:94865]
#INFO:	QUERY:	ENSMUSG00000020948	KLHL28	kelch-like 28 [Source:MGI Symbol;Acc:MGI:1913939]
#INFO:	QUERY:	ENSMUSG00000021339	MRS2	MRS2 magnesium transporter [Source:MGI Symbol;Acc:MGI:2685748]
#INFO:	QUERY:	ENSMUSG00000063229	LDHA	lactate dehydrogenase A [Source:MGI Symbol;Acc:MGI:96759]
#INFO:	QUERY:	ENSMUSG00000060510	ZFP266	zinc finger protein 266 [Source:MGI Symbol;Acc:MGI:1924769]
#INFO:	QUERY:	ENSMUSG00000025825	ISCU	iron-sulfur cluster assembly enzyme [Source:MGI Symbol;Acc:MGI:1913633]
#INFO:	QUERY:	ENSMUSG00000062931	ZFP938	zinc finger protein 938 [Source:MGI Symbol;Acc:MGI:3621440]
#INFO:	QUERY:	ENSMUSG00000002733	PLEKHA3	pleckstrin homology domain-containing, family A (phosphoinositide binding specific) member 3 [Source:MGI Symbol;Acc:MGI:1932515]
#INFO:	QUERY:	ENSMUSG00000042396	RBM7	RNA binding motif protein 7 [Source:MGI Symbol;Acc:MGI:1914260]
#INFO:	QUERY:	ENSMUSG00000107019	GM43682	predicted gene 43682 [Source:MGI Symbol;Acc:MGI:5663819]
#INFO:	QUERY:	ENSMUSG00000050071	BEX1	brain expressed X-linked 1 [Source:MGI Symbol;Acc:MGI:1328321]
#INFO:	QUERY:	ENSMUSG00000021871	PNP	purine-nucleoside phosphorylase [Source:MGI Symbol;Acc:MGI:97365]
#INFO:	QUERY:	ENSMUSG00000032320	RCN2	reticulocalbin 2 [Source:MGI Symbol;Acc:MGI:1349765]
#INFO:	QUERY:	ENSMUSG00000090093	GM14399	predicted gene 14399 [Source:MGI Symbol;Acc:MGI:3650082]
#INFO:	QUERY:	ENSMUSG00000031198	FUNDC2	FUN14 domain containing 2 [Source:MGI Symbol;Acc:MGI:1914641]
#INFO:	QUERY:	ENSMUSG00000006273	ATP6V1B2	ATPase, H+ transporting, lysosomal V1 subunit B2 [Source:MGI Symbol;Acc:MGI:109618]
#INFO:	QUERY:	ENSMUSG00000005610	EIF4G2	eukaryotic translation initiation factor 4, gamma 2 [Source:MGI Symbol;Acc:MGI:109207]
#INFO:	QUERY:	ENSMUSG00000025477	INPP5A	inositol polyphosphate-5-phosphatase A [Source:MGI Symbol;Acc:MGI:2686961]
#INFO:	QUERY:	ENSMUSG00000037710	CISD1	CDGSH iron sulfur domain 1 [Source:MGI Symbol;Acc:MGI:1261855]
#INFO:	QUERY:	ENSMUSG00000025158	RFNG	RFNG O-fucosylpeptide 3-beta-N-acetylglucosaminyltransferase [Source:MGI Symbol;Acc:MGI:894275]
#INFO:	QUERY:	ENSMUSG00000008348	UBC	ubiquitin C [Source:MGI Symbol;Acc:MGI:98889]
#INFO:	QUERY:	ENSMUSG00000026245	FARSB	phenylalanyl-tRNA synthetase, beta subunit [Source:MGI Symbol;Acc:MGI:1346035]
#INFO:	QUERY:	ENSMUSG00000001018	SNAPIN	SNAP-associated protein [Source:MGI Symbol;Acc:MGI:1333745]
#INFO:	QUERY:	ENSMUSG00000034731	DGKH	diacylglycerol kinase, eta [Source:MGI Symbol;Acc:MGI:2444188]
#INFO:	QUERY:	ENSMUSG00000021606	NDUFS6	NADH dehydrogenase (ubiquinone) Fe-S protein 6 [Source:MGI Symbol;Acc:MGI:107932]
#INFO:	QUERY:	ENSMUSG00000051483	CBR1	carbonyl reductase 1 [Source:MGI Symbol;Acc:MGI:88284]
#INFO:	QUERY:	ENSMUSG00000035202	LARS2	leucyl-tRNA synthetase, mitochondrial [Source:MGI Symbol;Acc:MGI:2142973]
#INFO:	QUERY:	ENSMUSG00000006276	EPS15L1	epidermal growth factor receptor pathway substrate 15-like 1 [Source:MGI Symbol;Acc:MGI:104582]
#INFO:	QUERY:	ENSMUSG00000020290	XPO1	exportin 1 [Source:MGI Symbol;Acc:MGI:2144013]
#INFO:	QUERY:	ENSMUSG00000058325	DOCK1	dedicator of cytokinesis 1 [Source:MGI Symbol;Acc:MGI:2429765]
#INFO:	QUERY:	ENSMUSG00000033475	TOMM6	translocase of outer mitochondrial membrane 6 homolog (yeast) [Source:MGI Symbol;Acc:MGI:1913369]
#INFO:	QUERY:	ENSMUSG00000024146	CRIPT	cysteine-rich PDZ-binding protein [Source:MGI Symbol;Acc:MGI:1929655]
#INFO:	QUERY:	ENSMUSG00000021794	GLUD1	glutamate dehydrogenase 1 [Source:MGI Symbol;Acc:MGI:95753]
#INFO:	QUERY:	ENSMUSG00000006134	CRKL	v-crk avian sarcoma virus CT10 oncogene homolog-like [Source:MGI Symbol;Acc:MGI:104686]
#INFO:	QUERY:	ENSMUSG00000071379	HPCAL1	hippocalcin-like 1 [Source:MGI Symbol;Acc:MGI:1855689]
#INFO:	QUERY:	ENSMUSG00000020952	SCFD1	Sec1 family domain containing 1 [Source:MGI Symbol;Acc:MGI:1924233]
#INFO:	QUERY:	ENSMUSG00000044894	UQCRQ	ubiquinol-cytochrome c reductase, complex III subunit VII [Source:MGI Symbol;Acc:MGI:107807]
#INFO:	QUERY:	ENSMUSG00000028648	NDUFS5	NADH dehydrogenase (ubiquinone) Fe-S protein 5 [Source:MGI Symbol;Acc:MGI:1890889]
#INFO:	QUERY:	ENSMUSG00000027170	EIF3M	eukaryotic translation initiation factor 3, subunit M [Source:MGI Symbol;Acc:MGI:1351744]
#INFO:	QUERY:	ENSMUSG00000024870	RAB1B	RAB1B, member RAS oncogene family [Source:MGI Symbol;Acc:MGI:1923558]
#INFO:	QUERY:	ENSMUSG00000029111	NELFA	negative elongation factor complex member A, Whsc2 [Source:MGI Symbol;Acc:MGI:1346098]
#INFO:	QUERY:	ENSMUSG00000029577	UBE3B	ubiquitin protein ligase E3B [Source:MGI Symbol;Acc:MGI:1891295]
#INFO:	QUERY:	ENSMUSG00000037049	SMPD1	sphingomyelin phosphodiesterase 1, acid lysosomal [Source:MGI Symbol;Acc:MGI:98325]
#INFO:	QUERY:	ENSMUSG00000024978	GPAM	glycerol-3-phosphate acyltransferase, mitochondrial [Source:MGI Symbol;Acc:MGI:109162]
#INFO:	QUERY:	ENSMUSG00000021917	SPCS1	signal peptidase complex subunit 1 homolog (S. cerevisiae) [Source:MGI Symbol;Acc:MGI:1916269]
#INFO:	QUERY:	ENSMUSG00000065037	RN7SK	RNA, 7SK, nuclear [Source:MGI Symbol;Acc:MGI:103186]
#INFO:	QUERY:	ENSMUSG00000035847	IDS	iduronate 2-sulfatase [Source:MGI Symbol;Acc:MGI:96417]
#INFO:	QUERY:	ENSMUSG00000025290	RPS24	ribosomal protein S24 [Source:MGI Symbol;Acc:MGI:98147]
#INFO:	QUERY:	ENSMUSG00000109139	GM44798	predicted gene 44798 [Source:MGI Symbol;Acc:MGI:5753374]
#INFO:	QUERY:	ENSMUSG00000037563	RPS16	ribosomal protein S16 [Source:MGI Symbol;Acc:MGI:98118]
#INFO:	QUERY:	ENSMUSG00000058135	GSTM1	glutathione S-transferase, mu 1 [Source:MGI Symbol;Acc:MGI:95860]
#INFO:	QUERY:	ENSMUSG00000021610	CLPTM1L	CLPTM1-like [Source:MGI Symbol;Acc:MGI:2442892]
#INFO:	QUERY:	ENSMUSG00000037742	EEF1A1	eukaryotic translation elongation factor 1 alpha 1 [Source:MGI Symbol;Acc:MGI:1096881]
#INFO:	QUERY:	ENSMUSG00000031447	LAMP1	lysosomal-associated membrane protein 1 [Source:MGI Symbol;Acc:MGI:96745]
#INFO:	QUERY:	ENSMUSG00000005873	REEP5	receptor accessory protein 5 [Source:MGI Symbol;Acc:MGI:1270152]
#INFO:	QUERY:	ENSMUSG00000031347	CETN2	centrin 2 [Source:MGI Symbol;Acc:MGI:1347085]
#INFO:	QUERY:	ENSMUSG00000032383	PPIB	peptidylprolyl isomerase B [Source:MGI Symbol;Acc:MGI:97750]
#INFO:	QUERY:	ENSMUSG00000012848	RPS5	ribosomal protein S5 [Source:MGI Symbol;Acc:MGI:1097682]
#INFO:	QUERY:	ENSMUSG00000028691	PRDX1	peroxiredoxin 1 [Source:MGI Symbol;Acc:MGI:99523]
#INFO:	QUERY:	ENSMUSG00000079641	RPL39	ribosomal protein L39 [Source:MGI Symbol;Acc:MGI:1914498]
#INFO:	QUERY:	ENSMUSG00000022517	MGRN1	mahogunin, ring finger 1 [Source:MGI Symbol;Acc:MGI:2447670]
#INFO:	QUERY:	ENSMUSG00000035232	PDK3	pyruvate dehydrogenase kinase, isoenzyme 3 [Source:MGI Symbol;Acc:MGI:2384308]
#INFO:	QUERY:	ENSMUSG00000028495	RPS6	ribosomal protein S6 [Source:MGI Symbol;Acc:MGI:98159]
#INFO:	QUERY:	ENSMUSG00000063576	KLHDC3	kelch domain containing 3 [Source:MGI Symbol;Acc:MGI:2651568]
#INFO:	QUERY:	ENSMUSG00000022200	GOLPH3	golgi phosphoprotein 3 [Source:MGI Symbol;Acc:MGI:1913879]
#INFO:	QUERY:	ENSMUSG00000053329	D10JHU81E	DNA segment, Chr 10, Johns Hopkins University 81 expressed [Source:MGI Symbol;Acc:MGI:1351861]
#INFO:	QUERY:	ENSMUSG00000084883	CCDC85C	coiled-coil domain containing 85C [Source:MGI Symbol;Acc:MGI:3644008]
#INFO:	QUERY:	ENSMUSG00000025868	HIGD2A	HIG1 domain family, member 2A [Source:MGI Symbol;Acc:MGI:1914294]
#INFO:	QUERY:	ENSMUSG00000046330	RPL37A	ribosomal protein L37a [Source:MGI Symbol;Acc:MGI:98068]
#INFO:	QUERY:	ENSMUSG00000054459	VSNL1	visinin-like 1 [Source:MGI Symbol;Acc:MGI:1349453]
#INFO:	QUERY:	ENSMUSG00000028773	FABP3	fatty acid binding protein 3, muscle and heart [Source:MGI Symbol;Acc:MGI:95476]
#INFO:	QUERY:	ENSMUSG00000035443	THYN1	thymocyte nuclear protein 1 [Source:MGI Symbol;Acc:MGI:1925112]
#INFO:	QUERY:	ENSMUSG00000074264	AMY1	amylase 1, salivary [Source:MGI Symbol;Acc:MGI:88019]
#INFO:	QUERY:	ENSMUSG00000022956	ATP5O	ATP synthase, H+ transporting, mitochondrial F1 complex, O subunit [Source:MGI Symbol;Acc:MGI:106341]
#INFO:	QUERY:	ENSMUSG00000025203	SCD2	stearoyl-Coenzyme A desaturase 2 [Source:MGI Symbol;Acc:MGI:98240]
#INFO:	QUERY:	ENSMUSG00000021417	ECI2	enoyl-Coenzyme A delta isomerase 2 [Source:MGI Symbol;Acc:MGI:1346064]
#INFO:	QUERY:	ENSMUSG00000064339	MT-RNR2	mitochondrially encoded 16S rRNA [Source:MGI Symbol;Acc:MGI:102492]
#INFO:	QUERY:	ENSMUSG00000033595	LGI3	leucine-rich repeat LGI family, member 3 [Source:MGI Symbol;Acc:MGI:2182619]
#INFO:	QUERY:	ENSMUSG00000013622	ATRAID	all-trans retinoic acid induced differentiation factor [Source:MGI Symbol;Acc:MGI:1918918]
#INFO:	QUERY:	ENSMUSG00000034892	RPS29	ribosomal protein S29 [Source:MGI Symbol;Acc:MGI:107681]
#INFO:	QUERY:	ENSMUSG00000031532	SARAF	store-operated calcium entry-associated regulatory factor [Source:MGI Symbol;Acc:MGI:1915137]
#INFO:	QUERY:	ENSMUSG00000016344	PPDPF	pancreatic progenitor cell differentiation and proliferation factor [Source:MGI Symbol;Acc:MGI:1913746]
#INFO:	QUERY:	ENSMUSG00000015090	PTGDS	prostaglandin D2 synthase (brain) [Source:MGI Symbol;Acc:MGI:99261]
#INFO:	QUERY:	ENSMUSG00000020402	VDAC1	voltage-dependent anion channel 1 [Source:MGI Symbol;Acc:MGI:106919]
#INFO:	QUERY:	ENSMUSG00000001785	PWP1	PWP1 homolog, endonuclein [Source:MGI Symbol;Acc:MGI:1914735]
#INFO:	QUERY:	ENSMUSG00000050148	UBQLN2	ubiquilin 2 [Source:MGI Symbol;Acc:MGI:1860283]
#INFO:	QUERY:	ENSMUSG00000079297	GM2223	predicted pseudogene 2223 [Source:MGI Symbol;Acc:MGI:3780393]
#INFO:	QUERY:	ENSMUSG00000020137	THAP2	THAP domain containing, apoptosis associated protein 2 [Source:MGI Symbol;Acc:MGI:1914066]
#INFO:	QUERY:	ENSMUSG00000037526	ATG14	autophagy related 14 [Source:MGI Symbol;Acc:MGI:1261775]
#INFO:	QUERY:	ENSMUSG00000035964	TMEM59L	transmembrane protein 59-like [Source:MGI Symbol;Acc:MGI:1915187]
#INFO:	QUERY:	ENSMUSG00000030591	PSMD8	proteasome (prosome, macropain) 26S subunit, non-ATPase, 8 [Source:MGI Symbol;Acc:MGI:1888669]
#INFO:	QUERY:	ENSMUSG00000059325	HOPX	HOP homeobox [Source:MGI Symbol;Acc:MGI:1916782]
#INFO:	QUERY:	ENSMUSG00000032281	ACSBG1	acyl-CoA synthetase bubblegum family member 1 [Source:MGI Symbol;Acc:MGI:2385656]
#INFO:	QUERY:	ENSMUSG00000032324	TSPAN3	tetraspanin 3 [Source:MGI Symbol;Acc:MGI:1928098]
#INFO:	QUERY:	ENSMUSG00000030654	ARL6IP1	ADP-ribosylation factor-like 6 interacting protein 1 [Source:MGI Symbol;Acc:MGI:1858943]
#INFO:	QUERY:	ENSMUSG00000077714	SNORD17	small nucleolar RNA, C/D box 17 [Source:MGI Symbol;Acc:MGI:3819523]
#INFO:	QUERY:	ENSMUSG00000005881	ERGIC3	ERGIC and golgi 3 [Source:MGI Symbol;Acc:MGI:1913616]
#INFO:	QUERY:	ENSMUSG00000040759	CMTM5	CKLF-like MARVEL transmembrane domain containing 5 [Source:MGI Symbol;Acc:MGI:2447164]
#INFO:	QUERY:	ENSMUSG00000063457	RPS15	ribosomal protein S15 [Source:MGI Symbol;Acc:MGI:98117]
#INFO:	QUERY:	ENSMUSG00000022564	GRINA	glutamate receptor, ionotropic, N-methyl D-aspartate-associated protein 1 (glutamate binding) [Source:MGI Symbol;Acc:MGI:1913418]
#INFO:	QUERY:	ENSMUSG00000088088	RMRP	RNA component of mitochondrial RNAase P [Source:MGI Symbol;Acc:MGI:97937]
#INFO:	QUERY:	ENSMUSG00000038160	ATG5	autophagy related 5 [Source:MGI Symbol;Acc:MGI:1277186]
#INFO:	QUERY:	ENSMUSG00000038803	OST4	oligosaccharyltransferase complex subunit 4 (non-catalytic) [Source:MGI Symbol;Acc:MGI:1914945]
#INFO:	QUERY:	ENSMUSG00000029247	PAICS	phosphoribosylaminoimidazole carboxylase, phosphoribosylaminoribosylaminoimidazole, succinocarboxamide synthetase [Source:MGI Symbol;Acc:MGI:1914304]
#INFO:	QUERY:	ENSMUSG00000052146	RPS10	ribosomal protein S10 [Source:MGI Symbol;Acc:MGI:1914347]
#INFO:	QUERY:	ENSMUSG00000023456	TPI1	triosephosphate isomerase 1 [Source:MGI Symbol;Acc:MGI:98797]
#INFO:	QUERY:	ENSMUSG00000041126	H2AFV	H2A histone family, member V [Source:MGI Symbol;Acc:MGI:1924855]
#INFO:	QUERY:	ENSMUSG00000023094	MSRB2	methionine sulfoxide reductase B2 [Source:MGI Symbol;Acc:MGI:1923717]
#INFO:	QUERY:	ENSMUSG00000022261	SDC2	syndecan 2 [Source:MGI Symbol;Acc:MGI:1349165]
#INFO:	QUERY:	ENSMUSG00000019478	RAB4A	RAB4A, member RAS oncogene family [Source:MGI Symbol;Acc:MGI:105069]
#INFO:	QUERY:	ENSMUSG00000096764	GM21985	predicted gene 21985 [Source:MGI Symbol;Acc:MGI:5439454]
#INFO:	QUERY:	ENSMUSG00000029234	TMEM165	transmembrane protein 165 [Source:MGI Symbol;Acc:MGI:894407]
#INFO:	QUERY:	ENSMUSG00000027166	DNAJC24	DnaJ heat shock protein family (Hsp40) member C24 [Source:MGI Symbol;Acc:MGI:1919522]
#INFO:	QUERY:	ENSMUSG00000036442	THAP11	THAP domain containing 11 [Source:MGI Symbol;Acc:MGI:1930964]
#INFO:	QUERY:	ENSMUSG00000006373	PGRMC1	progesterone receptor membrane component 1 [Source:MGI Symbol;Acc:MGI:1858305]
#INFO:	QUERY:	ENSMUSG00000029048	RER1	retention in endoplasmic reticulum sorting receptor 1 [Source:MGI Symbol;Acc:MGI:1915080]
#INFO:	QUERY:	ENSMUSG00000025362	RPS26	ribosomal protein S26 [Source:MGI Symbol;Acc:MGI:1351628]
#INFO:	QUERY:	ENSMUSG00000089945	PAKAP	paralemmin A kinase anchor protein [Source:MGI Symbol;Acc:MGI:5141924]
#INFO:	QUERY:	ENSMUSG00000044986	TST	thiosulfate sulfurtransferase, mitochondrial [Source:MGI Symbol;Acc:MGI:98852]
#INFO:	QUERY:	ENSMUSG00000060981	HIST1H4H	histone cluster 1, H4h [Source:MGI Symbol;Acc:MGI:2448427]
#INFO:	QUERY:	ENSMUSG00000078879	ZFP973	zinc finger protein 973 [Source:MGI Symbol;Acc:MGI:3615331]
#INFO:	QUERY:	ENSMUSG00000021076	ACTR10	ARP10 actin-related protein 10 [Source:MGI Symbol;Acc:MGI:1891654]
#INFO:	QUERY:	ENSMUSG00000060152	POP5	processing of precursor 5, ribonuclease P/MRP family (S. cerevisiae) [Source:MGI Symbol;Acc:MGI:2151221]
#INFO:	QUERY:	ENSMUSG00000102918	PCDHGC3	protocadherin gamma subfamily C, 3 [Source:MGI Symbol;Acc:MGI:1935201]
#INFO:	QUERY:	ENSMUSG00000031762	MT2	metallothionein 2 [Source:MGI Symbol;Acc:MGI:97172]
#INFO:	QUERY:	ENSMUSG00000021775	NR1D2	nuclear receptor subfamily 1, group D, member 2 [Source:MGI Symbol;Acc:MGI:2449205]
#INFO:	QUERY:	ENSMUSG00000032766	GNG11	guanine nucleotide binding protein (G protein), gamma 11 [Source:MGI Symbol;Acc:MGI:1913316]
#INFO:	QUERY:	ENSMUSG00000073640	RPL27-PS3	ribosomal protein L27, pseudogene 3 [Source:MGI Symbol;Acc:MGI:3646174]
#INFO:	QUERY:	ENSMUSG00000097142	GM26778	predicted gene, 26778 [Source:MGI Symbol;Acc:MGI:5477272]
#INFO:	QUERY:	ENSMUSG00000035885	COX8A	cytochrome c oxidase subunit VIIIa [Source:MGI Symbol;Acc:MGI:105959]
#INFO:	QUERY:	ENSMUSG00000051671	COA6	cytochrome c oxidase assembly factor 6 [Source:MGI Symbol;Acc:MGI:1915142]
#INFO:	QUERY:	ENSMUSG00000028837	PSMB2	proteasome (prosome, macropain) subunit, beta type 2 [Source:MGI Symbol;Acc:MGI:1347045]
#INFO:	QUERY:	ENSMUSG00000028070	NAXE	NAD(P)HX epimerase [Source:MGI Symbol;Acc:MGI:2180167]
#INFO:	QUERY:	ENSMUSG00000030327	NECAP1	NECAP endocytosis associated 1 [Source:MGI Symbol;Acc:MGI:1914852]
#INFO:	QUERY:	ENSMUSG00000038622	MED30	mediator complex subunit 30 [Source:MGI Symbol;Acc:MGI:1917040]
#INFO:	QUERY:	ENSMUSG00000021038	VIPAS39	VPS33B interacting protein, apical-basolateral polarity regulator, spe-39 homolog [Source:MGI Symbol;Acc:MGI:2144805]
#INFO:	QUERY:	ENSMUSG00000059734	NDUFS8	NADH dehydrogenase (ubiquinone) Fe-S protein 8 [Source:MGI Symbol;Acc:MGI:2385079]
#INFO:	QUERY:	ENSMUSG00000025739	GNG13	guanine nucleotide binding protein (G protein), gamma 13 [Source:MGI Symbol;Acc:MGI:1925616]
#INFO:	QUERY:	ENSMUSG00000038717	ATP5L	ATP synthase, H+ transporting, mitochondrial F0 complex, subunit G [Source:MGI Symbol;Acc:MGI:1351597]
#INFO:	QUERY:	ENSMUSG00000075706	GPX4	glutathione peroxidase 4 [Source:MGI Symbol;Acc:MGI:104767]
#INFO:	QUERY:	ENSMUSG00000040128	PNRC1	proline-rich nuclear receptor coactivator 1 [Source:MGI Symbol;Acc:MGI:1917838]
#INFO:	QUERY:	ENSMUSG00000034022	CPSF1	cleavage and polyadenylation specific factor 1 [Source:MGI Symbol;Acc:MGI:2679722]
#INFO:	QUERY:	ENSMUSG00000029066	MRPL20	mitochondrial ribosomal protein L20 [Source:MGI Symbol;Acc:MGI:2137221]
#INFO:	QUERY:	ENSMUSG00000098274	RPL24	ribosomal protein L24 [Source:MGI Symbol;Acc:MGI:1915443]
#INFO:	QUERY:	ENSMUSG00000018585	ATOX1	antioxidant 1 copper chaperone [Source:MGI Symbol;Acc:MGI:1333855]
#INFO:	QUERY:	ENSMUSG00000024827	GLDC	glycine decarboxylase [Source:MGI Symbol;Acc:MGI:1341155]
#INFO:	QUERY:	ENSMUSG00000024665	FADS2	fatty acid desaturase 2 [Source:MGI Symbol;Acc:MGI:1930079]
#INFO:	QUERY:	ENSMUSG00000105700	GM42772	predicted gene 42772 [Source:MGI Symbol;Acc:MGI:5662909]
#INFO:	QUERY:	ENSMUSG00000074403	HIST2H3B	histone cluster 2, H3b [Source:MGI Symbol;Acc:MGI:2448351]
#INFO:	QUERY:	ENSMUSG00000000214	TH	tyrosine hydroxylase [Source:MGI Symbol;Acc:MGI:98735]
#INFO:	QUERY:	ENSMUSG00000078867	GM14418	predicted gene 14418 [Source:MGI Symbol;Acc:MGI:3702408]
#INFO:	QUERY:	ENSMUSG00000020477	MRPS24	mitochondrial ribosomal protein S24 [Source:MGI Symbol;Acc:MGI:1928142]
#INFO:	QUERY:	ENSMUSG00000031610	SCRG1	scrapie responsive gene 1 [Source:MGI Symbol;Acc:MGI:1328308]
#INFO:	QUERY:	ENSMUSG00000061482	HIST1H4D	histone cluster 1, H4d [Source:MGI Symbol;Acc:MGI:2448423]
#INFO:	QUERY:	ENSMUSG00000071649	B3GAT3	beta-1,3-glucuronyltransferase 3 (glucuronosyltransferase I) [Source:MGI Symbol;Acc:MGI:1919977]
#INFO:	QUERY:	ENSMUSG00000002679	MED6	mediator complex subunit 6 [Source:MGI Symbol;Acc:MGI:1917042]
#INFO:	QUERY:	ENSMUSG00000081855	RPL17-PS5	ribosomal protein L17, pseudogene 5 [Source:MGI Symbol;Acc:MGI:3704246]
#INFO:	QUERY:	ENSMUSG00000045257	MORN2	MORN repeat containing 2 [Source:MGI Symbol;Acc:MGI:2674071]
#INFO:	QUERY:	ENSMUSG00000088948	GM23262	predicted gene, 23262 [Source:MGI Symbol;Acc:MGI:5453039]
#INFO:	QUERY:	ENSMUSG00000090625	GM20721	predicted gene, 20721 [Source:MGI Symbol;Acc:MGI:5313030]
#INFO:	QUERY:	ENSMUSG00000008140	EMC10	ER membrane protein complex subunit 10 [Source:MGI Symbol;Acc:MGI:1916933]
#INFO:	QUERY:	ENSMUSG00000097338	GM2464	predicted gene 2464 [Source:MGI Symbol;Acc:MGI:3780631]
#INFO:	QUERY:	ENSMUSG00000078126	RPL23A-PS3	ribosomal protein L23A, pseudogene 3 [Source:MGI Symbol;Acc:MGI:3781353]
#INFO:	QUERY:	ENSMUSG00000108585	N/A	N/A
#INFO:	QUERY:	ENSMUSG00000073940	HBB-BT	hemoglobin, beta adult t chain [Source:MGI Symbol;Acc:MGI:5474850]
#INFO:	QUERY:	ENSMUSG00000031982	ARV1	ARV1 homolog, fatty acid homeostasis modulator [Source:MGI Symbol;Acc:MGI:1916115]
#INFO:	QUERY:	ENSMUSG00000102222	PCDHGA10	protocadherin gamma subfamily A, 10 [Source:MGI Symbol;Acc:MGI:1935227]
#INFO:
#INFO:	--- BIOGRID_NOIEA neighbours
#INFO:
#INFO:	BIOGRID_NOIEA NEIGHBOUR:	STX1A	syntaxin 1A (brain) [Source:MGI Symbol;Acc:MGI:109355]
#INFO:	BIOGRID_NOIEA NEIGHBOUR:	NOTCH1	notch 1 [Source:MGI Symbol;Acc:MGI:97363]
#INFO:	BIOGRID_NOIEA NEIGHBOUR:	PFN2	profilin 2 [Source:MGI Symbol;Acc:MGI:97550]
#INFO:	BIOGRID_NOIEA NEIGHBOUR:	NCSTN	nicastrin [Source:MGI Symbol;Acc:MGI:1891700]
#INFO:	BIOGRID_NOIEA NEIGHBOUR:	PTGS2	prostaglandin-endoperoxide synthase 2 [Source:MGI Symbol;Acc:MGI:97798]
#INFO:	BIOGRID_NOIEA NEIGHBOUR:	CANX	calnexin [Source:MGI Symbol;Acc:MGI:88261]
#INFO:	BIOGRID_NOIEA NEIGHBOUR:	DARS	aspartyl-tRNA synthetase [Source:MGI Symbol;Acc:MGI:2442544]
#INFO:	BIOGRID_NOIEA NEIGHBOUR:	DBT	dihydrolipoamide branched chain transacylase E2 [Source:MGI Symbol;Acc:MGI:105386]
#INFO:	BIOGRID_NOIEA NEIGHBOUR:	PDE12	phosphodiesterase 12 [Source:MGI Symbol;Acc:MGI:2443226]
#INFO:	BIOGRID_NOIEA NEIGHBOUR:	FAF1	Fas-associated factor 1 [Source:MGI Symbol;Acc:MGI:109419]
#INFO:	BIOGRID_NOIEA NEIGHBOUR:	MPL	myeloproliferative leukemia virus oncogene [Source:MGI Symbol;Acc:MGI:97076]
#INFO:	BIOGRID_NOIEA NEIGHBOUR:	VAMP2	vesicle-associated membrane protein 2 [Source:MGI Symbol;Acc:MGI:1313277]
#INFO:	BIOGRID_NOIEA NEIGHBOUR:	CASP3	caspase 3 [Source:MGI Symbol;Acc:MGI:107739]
#INFO:	BIOGRID_NOIEA NEIGHBOUR:	LLGL2	lethal giant larvae homolog 2 (Drosophila) [Source:MGI Symbol;Acc:MGI:1918843]
#INFO:	BIOGRID_NOIEA NEIGHBOUR:	H2-AB1	histocompatibility 2, class II antigen A, beta 1 [Source:MGI Symbol;Acc:MGI:103070]
#INFO:	BIOGRID_NOIEA NEIGHBOUR:	TCF7L1	transcription factor 7 like 1 (T cell specific, HMG box) [Source:MGI Symbol;Acc:MGI:1202876]
#INFO:	BIOGRID_NOIEA NEIGHBOUR:	GTF2E1	general transcription factor II E, polypeptide 1 (alpha subunit) [Source:MGI Symbol;Acc:MGI:1921447]
#INFO:	BIOGRID_NOIEA NEIGHBOUR:	CISD3	CDGSH iron sulfur domain 3 [Source:MGI Symbol;Acc:MGI:101788]
#INFO:	BIOGRID_NOIEA NEIGHBOUR:	USP44	ubiquitin specific peptidase 44 [Source:MGI Symbol;Acc:MGI:3045318]
#INFO:	BIOGRID_NOIEA NEIGHBOUR:	STAT5A	signal transducer and activator of transcription 5A [Source:MGI Symbol;Acc:MGI:103036]
#INFO:	BIOGRID_NOIEA NEIGHBOUR:	SHCBP1	Shc SH2-domain binding protein 1 [Source:MGI Symbol;Acc:MGI:1338802]
#INFO:	BIOGRID_NOIEA NEIGHBOUR:	BCL2L11	BCL2-like 11 (apoptosis facilitator) [Source:MGI Symbol;Acc:MGI:1197519]
#INFO:	BIOGRID_NOIEA NEIGHBOUR:	RABGEF1	RAB guanine nucleotide exchange factor (GEF) 1 [Source:MGI Symbol;Acc:MGI:1929459]
#INFO:	BIOGRID_NOIEA NEIGHBOUR:	UBE3A	ubiquitin protein ligase E3A [Source:MGI Symbol;Acc:MGI:105098]
#INFO:	BIOGRID_NOIEA NEIGHBOUR:	NVL	nuclear VCP-like [Source:MGI Symbol;Acc:MGI:1914709]
#INFO:	BIOGRID_NOIEA NEIGHBOUR:	MRPL2	mitochondrial ribosomal protein L2 [Source:MGI Symbol;Acc:MGI:1351622]
#INFO:	BIOGRID_NOIEA NEIGHBOUR:	RRP12	ribosomal RNA processing 12 homolog (S. cerevisiae) [Source:MGI Symbol;Acc:MGI:2147437]
#INFO:	BIOGRID_NOIEA NEIGHBOUR:	FOS	FBJ osteosarcoma oncogene [Source:MGI Symbol;Acc:MGI:95574]
#INFO:	BIOGRID_NOIEA NEIGHBOUR:	OLA1	Obg-like ATPase 1 [Source:MGI Symbol;Acc:MGI:1914309]
#INFO:	BIOGRID_NOIEA NEIGHBOUR:	PTEN	phosphatase and tensin homolog [Source:MGI Symbol;Acc:MGI:109583]
#INFO:	BIOGRID_NOIEA NEIGHBOUR:	GCDH	glutaryl-Coenzyme A dehydrogenase [Source:MGI Symbol;Acc:MGI:104541]
#INFO:	BIOGRID_NOIEA NEIGHBOUR:	SF3B1	splicing factor 3b, subunit 1 [Source:MGI Symbol;Acc:MGI:1932339]
#INFO:	BIOGRID_NOIEA NEIGHBOUR:	GTPBP4	GTP binding protein 4 [Source:MGI Symbol;Acc:MGI:1916487]
#INFO:	BIOGRID_NOIEA NEIGHBOUR:	UBE2D3	ubiquitin-conjugating enzyme E2D 3 [Source:MGI Symbol;Acc:MGI:1913355]
#INFO:	BIOGRID_NOIEA NEIGHBOUR:	KLHDC10	kelch domain containing 10 [Source:MGI Symbol;Acc:MGI:1924038]
#INFO:	BIOGRID_NOIEA NEIGHBOUR:	RPL6	ribosomal protein L6 [Source:MGI Symbol;Acc:MGI:108057]
#INFO:	BIOGRID_NOIEA NEIGHBOUR:	PABPC5	poly(A) binding protein, cytoplasmic 5 [Source:MGI Symbol;Acc:MGI:2136401]
#INFO:	BIOGRID_NOIEA NEIGHBOUR:	TBK1	TANK-binding kinase 1 [Source:MGI Symbol;Acc:MGI:1929658]
#INFO:	BIOGRID_NOIEA NEIGHBOUR:	PPARG	peroxisome proliferator activated receptor gamma [Source:MGI Symbol;Acc:MGI:97747]
#INFO:	BIOGRID_NOIEA NEIGHBOUR:	UCHL3	ubiquitin carboxyl-terminal esterase L3 (ubiquitin thiolesterase) [Source:MGI Symbol;Acc:MGI:1355274]
#INFO:	BIOGRID_NOIEA NEIGHBOUR:	SOS1	son of sevenless homolog 1 (Drosophila) [Source:MGI Symbol;Acc:MGI:98354]
#INFO:	BIOGRID_NOIEA NEIGHBOUR:	TPR	translocated promoter region, nuclear basket protein [Source:MGI Symbol;Acc:MGI:1922066]
#INFO:	BIOGRID_NOIEA NEIGHBOUR:	AP2M1	adaptor-related protein complex 2, mu 1 subunit [Source:MGI Symbol;Acc:MGI:1298405]
#INFO:	BIOGRID_NOIEA NEIGHBOUR:	SGPL1	sphingosine phosphate lyase 1 [Source:MGI Symbol;Acc:MGI:1261415]
#INFO:	BIOGRID_NOIEA NEIGHBOUR:	AGPAT5	1-acylglycerol-3-phosphate O-acyltransferase 5 (lysophosphatidic acid acyltransferase, epsilon) [Source:MGI Symbol;Acc:MGI:1196345]
#INFO:	BIOGRID_NOIEA NEIGHBOUR:	ERCC1	excision repair cross-complementing rodent repair deficiency, complementation group 1 [Source:MGI Symbol;Acc:MGI:95412]
#INFO:	BIOGRID_NOIEA NEIGHBOUR:	NOS2	nitric oxide synthase 2, inducible [Source:MGI Symbol;Acc:MGI:97361]
#INFO:	BIOGRID_NOIEA NEIGHBOUR:	PDCD6IP	programmed cell death 6 interacting protein [Source:MGI Symbol;Acc:MGI:1333753]
#INFO:	BIOGRID_NOIEA NEIGHBOUR:	ESR1	estrogen receptor 1 (alpha) [Source:MGI Symbol;Acc:MGI:1352467]
#INFO:	BIOGRID_NOIEA NEIGHBOUR:	MDM2	transformed mouse 3T3 cell double minute 2 [Source:MGI Symbol;Acc:MGI:96952]
#INFO:	BIOGRID_NOIEA NEIGHBOUR:	RPL15	ribosomal protein L15 [Source:MGI Symbol;Acc:MGI:1913730]
#INFO:	BIOGRID_NOIEA NEIGHBOUR:	CDH2	cadherin 2 [Source:MGI Symbol;Acc:MGI:88355]
#INFO:	BIOGRID_NOIEA NEIGHBOUR:	IL6ST	interleukin 6 signal transducer [Source:MGI Symbol;Acc:MGI:96560]
#INFO:	BIOGRID_NOIEA NEIGHBOUR:	WDR45B	WD repeat domain 45B [Source:MGI Symbol;Acc:MGI:1914090]
#INFO:	BIOGRID_NOIEA NEIGHBOUR:	ZRANB1	zinc finger, RAN-binding domain containing 1 [Source:MGI Symbol;Acc:MGI:106441]
#INFO:	BIOGRID_NOIEA NEIGHBOUR:	GPHN	gephyrin [Source:MGI Symbol;Acc:MGI:109602]
#INFO:	BIOGRID_NOIEA NEIGHBOUR:	CRY2	cryptochrome 2 (photolyase-like) [Source:MGI Symbol;Acc:MGI:1270859]
#INFO:	BIOGRID_NOIEA NEIGHBOUR:	NSUN2	NOL1/NOP2/Sun domain family member 2 [Source:MGI Symbol;Acc:MGI:107252]
#INFO:	BIOGRID_NOIEA NEIGHBOUR:	TRIP4	thyroid hormone receptor interactor 4 [Source:MGI Symbol;Acc:MGI:1928469]
#INFO:	BIOGRID_NOIEA NEIGHBOUR:	GLI2	GLI-Kruppel family member GLI2 [Source:MGI Symbol;Acc:MGI:95728]
#INFO:	BIOGRID_NOIEA NEIGHBOUR:	PRKCI	protein kinase C, iota [Source:MGI Symbol;Acc:MGI:99260]
#INFO:	BIOGRID_NOIEA NEIGHBOUR:	TCF7L2	transcription factor 7 like 2, T cell specific, HMG box [Source:MGI Symbol;Acc:MGI:1202879]
#INFO:	BIOGRID_NOIEA NEIGHBOUR:	RNF181	ring finger protein 181 [Source:MGI Symbol;Acc:MGI:1913760]
#INFO:	BIOGRID_NOIEA NEIGHBOUR:	UBE2K	ubiquitin-conjugating enzyme E2K [Source:MGI Symbol;Acc:MGI:1858216]
#INFO:	BIOGRID_NOIEA NEIGHBOUR:	NPHP1	nephronophthisis 1 (juvenile) homolog (human) [Source:MGI Symbol;Acc:MGI:1858233]
#INFO:	BIOGRID_NOIEA NEIGHBOUR:	AGFG1	ArfGAP with FG repeats 1 [Source:MGI Symbol;Acc:MGI:1333754]
#INFO:	BIOGRID_NOIEA NEIGHBOUR:	B2M	beta-2 microglobulin [Source:MGI Symbol;Acc:MGI:88127]
#INFO:	BIOGRID_NOIEA NEIGHBOUR:	AP2A1	adaptor-related protein complex 2, alpha 1 subunit [Source:MGI Symbol;Acc:MGI:101921]
#INFO:	BIOGRID_NOIEA NEIGHBOUR:	RBCK1	RanBP-type and C3HC4-type zinc finger containing 1 [Source:MGI Symbol;Acc:MGI:1344372]
#INFO:	BIOGRID_NOIEA NEIGHBOUR:	MBTD1	mbt domain containing 1 [Source:MGI Symbol;Acc:MGI:2143977]
#INFO:	BIOGRID_NOIEA NEIGHBOUR:	EIF4A1	eukaryotic translation initiation factor 4A1 [Source:MGI Symbol;Acc:MGI:95303]
#INFO:	BIOGRID_NOIEA NEIGHBOUR:	ANKRD13D	ankyrin repeat domain 13 family, member D [Source:MGI Symbol;Acc:MGI:1915673]
#INFO:	BIOGRID_NOIEA NEIGHBOUR:	RNF185	ring finger protein 185 [Source:MGI Symbol;Acc:MGI:1922078]
#INFO:	BIOGRID_NOIEA NEIGHBOUR:	TCF4	transcription factor 4 [Source:MGI Symbol;Acc:MGI:98506]
#INFO:	BIOGRID_NOIEA NEIGHBOUR:	SLC7A5	solute carrier family 7 (cationic amino acid transporter, y+ system), member 5 [Source:MGI Symbol;Acc:MGI:1298205]
#INFO:	BIOGRID_NOIEA NEIGHBOUR:	LLGL1	lethal giant larvae homolog 1 (Drosophila) [Source:MGI Symbol;Acc:MGI:102682]
#INFO:	BIOGRID_NOIEA NEIGHBOUR:	IKBKG	inhibitor of kappaB kinase gamma [Source:MGI Symbol;Acc:MGI:1338074]
#INFO:	BIOGRID_NOIEA NEIGHBOUR:	AIMP2	aminoacyl tRNA synthetase complex-interacting multifunctional protein 2 [Source:MGI Symbol;Acc:MGI:2385237]
#INFO:	BIOGRID_NOIEA NEIGHBOUR:	LUC7L2	LUC7-like 2 (S. cerevisiae) [Source:MGI Symbol;Acc:MGI:2183260]
#INFO:	BIOGRID_NOIEA NEIGHBOUR:	CAPN15	calpain 15 [Source:MGI Symbol;Acc:MGI:1355075]
#INFO:	BIOGRID_NOIEA NEIGHBOUR:	DDX1	DEAD (Asp-Glu-Ala-Asp) box polypeptide 1 [Source:MGI Symbol;Acc:MGI:2144727]
#INFO:	BIOGRID_NOIEA NEIGHBOUR:	SCPEP1	serine carboxypeptidase 1 [Source:MGI Symbol;Acc:MGI:1921867]
#INFO:	BIOGRID_NOIEA NEIGHBOUR:	PFN1	profilin 1 [Source:MGI Symbol;Acc:MGI:97549]
#INFO:	BIOGRID_NOIEA NEIGHBOUR:	SAP18	Sin3-associated polypeptide 18 [Source:MGI Symbol;Acc:MGI:1277978]
#INFO:	BIOGRID_NOIEA NEIGHBOUR:	RPL28	ribosomal protein L28 [Source:MGI Symbol;Acc:MGI:101839]
#INFO:	BIOGRID_NOIEA NEIGHBOUR:	COX11	cytochrome c oxidase assembly protein 11 [Source:MGI Symbol;Acc:MGI:1917052]
#INFO:	BIOGRID_NOIEA NEIGHBOUR:	BECN1	beclin 1, autophagy related [Source:MGI Symbol;Acc:MGI:1891828]
#INFO:	BIOGRID_NOIEA NEIGHBOUR:	BRD8	bromodomain containing 8 [Source:MGI Symbol;Acc:MGI:1925906]
#INFO:	BIOGRID_NOIEA NEIGHBOUR:	PSMC1	protease (prosome, macropain) 26S subunit, ATPase 1 [Source:MGI Symbol;Acc:MGI:106054]
#INFO:	BIOGRID_NOIEA NEIGHBOUR:	ANP32B	acidic (leucine-rich) nuclear phosphoprotein 32 family, member B [Source:MGI Symbol;Acc:MGI:1914878]
#INFO:	BIOGRID_NOIEA NEIGHBOUR:	PDGFRB	platelet derived growth factor receptor, beta polypeptide [Source:MGI Symbol;Acc:MGI:97531]
#INFO:	BIOGRID_NOIEA NEIGHBOUR:	CDKN1B	cyclin-dependent kinase inhibitor 1B [Source:MGI Symbol;Acc:MGI:104565]
#INFO:	BIOGRID_NOIEA NEIGHBOUR:	SYNGAP1	synaptic Ras GTPase activating protein 1 homolog (rat) [Source:MGI Symbol;Acc:MGI:3039785]
#INFO:	BIOGRID_NOIEA NEIGHBOUR:	BAX	BCL2-associated X protein [Source:MGI Symbol;Acc:MGI:99702]
#INFO:	BIOGRID_NOIEA NEIGHBOUR:	ATP5A1	ATP synthase, H+ transporting, mitochondrial F1 complex, alpha subunit 1 [Source:MGI Symbol;Acc:MGI:88115]
#INFO:	BIOGRID_NOIEA NEIGHBOUR:	TCP1	t-complex protein 1 [Source:MGI Symbol;Acc:MGI:98535]
#INFO:	BIOGRID_NOIEA NEIGHBOUR:	OASL1	2'-5' oligoadenylate synthetase-like 1 [Source:MGI Symbol;Acc:MGI:2180849]
#INFO:	BIOGRID_NOIEA NEIGHBOUR:	MOB4	MOB family member 4, phocein [Source:MGI Symbol;Acc:MGI:104899]
#INFO:	BIOGRID_NOIEA NEIGHBOUR:	S100A10	S100 calcium binding protein A10 (calpactin) [Source:MGI Symbol;Acc:MGI:1339468]
#INFO:	BIOGRID_NOIEA NEIGHBOUR:	TCSTV1	2-cell-stage, variable group, member 1 [Source:MGI Symbol;Acc:MGI:1933437]
#INFO:	BIOGRID_NOIEA NEIGHBOUR:	MSX2	msh homeobox 2 [Source:MGI Symbol;Acc:MGI:97169]
#INFO:	BIOGRID_NOIEA NEIGHBOUR:	IARS	isoleucine-tRNA synthetase [Source:MGI Symbol;Acc:MGI:2145219]
#INFO:	BIOGRID_NOIEA NEIGHBOUR:	RPS3	ribosomal protein S3 [Source:MGI Symbol;Acc:MGI:1350917]
#INFO:	BIOGRID_NOIEA NEIGHBOUR:	PSMD3	proteasome (prosome, macropain) 26S subunit, non-ATPase, 3 [Source:MGI Symbol;Acc:MGI:98858]
#INFO:	BIOGRID_NOIEA NEIGHBOUR:	RAD23B	RAD23 homolog B, nucleotide excision repair protein [Source:MGI Symbol;Acc:MGI:105128]
#INFO:	BIOGRID_NOIEA NEIGHBOUR:	EEF1A2	eukaryotic translation elongation factor 1 alpha 2 [Source:MGI Symbol;Acc:MGI:1096317]
#INFO:	BIOGRID_NOIEA NEIGHBOUR:	TNKS	tankyrase, TRF1-interacting ankyrin-related ADP-ribose polymerase [Source:MGI Symbol;Acc:MGI:1341087]
#INFO:	BIOGRID_NOIEA NEIGHBOUR:	YES1	YES proto-oncogene 1, Src family tyrosine kinase [Source:MGI Symbol;Acc:MGI:99147]
#INFO:	BIOGRID_NOIEA NEIGHBOUR:	PALLD	palladin, cytoskeletal associated protein [Source:MGI Symbol;Acc:MGI:1919583]
#INFO:	BIOGRID_NOIEA NEIGHBOUR:	PLD6	phospholipase D family, member 6 [Source:MGI Symbol;Acc:MGI:2687283]
#INFO:	BIOGRID_NOIEA NEIGHBOUR:	TEFM	transcription elongation factor, mitochondrial [Source:MGI Symbol;Acc:MGI:1915800]
#INFO:	BIOGRID_NOIEA NEIGHBOUR:	ACTN4	actinin alpha 4 [Source:MGI Symbol;Acc:MGI:1890773]
#INFO:	BIOGRID_NOIEA NEIGHBOUR:	CUL2	cullin 2 [Source:MGI Symbol;Acc:MGI:1918995]
#INFO:	BIOGRID_NOIEA NEIGHBOUR:	USP40	ubiquitin specific peptidase 40 [Source:MGI Symbol;Acc:MGI:2443184]
#INFO:	BIOGRID_NOIEA NEIGHBOUR:	FILIP1	filamin A interacting protein 1 [Source:MGI Symbol;Acc:MGI:1917848]
#INFO:	BIOGRID_NOIEA NEIGHBOUR:	SLC12A3	solute carrier family 12, member 3 [Source:MGI Symbol;Acc:MGI:108114]
#INFO:	BIOGRID_NOIEA NEIGHBOUR:	ACTN1	actinin, alpha 1 [Source:MGI Symbol;Acc:MGI:2137706]
#INFO:	BIOGRID_NOIEA NEIGHBOUR:	MRPS7	mitchondrial ribosomal protein S7 [Source:MGI Symbol;Acc:MGI:1354367]
#INFO:	BIOGRID_NOIEA NEIGHBOUR:	RARA	retinoic acid receptor, alpha [Source:MGI Symbol;Acc:MGI:97856]
#INFO:	BIOGRID_NOIEA NEIGHBOUR:	HDAC6	histone deacetylase 6 [Source:MGI Symbol;Acc:MGI:1333752]
#INFO:	BIOGRID_NOIEA NEIGHBOUR:	USP34	ubiquitin specific peptidase 34 [Source:MGI Symbol;Acc:MGI:109473]
#INFO:	BIOGRID_NOIEA NEIGHBOUR:	GATA6	GATA binding protein 6 [Source:MGI Symbol;Acc:MGI:107516]
#INFO:	BIOGRID_NOIEA NEIGHBOUR:	EIF3C	eukaryotic translation initiation factor 3, subunit C [Source:MGI Symbol;Acc:MGI:1926966]
#INFO:	BIOGRID_NOIEA NEIGHBOUR:	PABPC2	poly(A) binding protein, cytoplasmic 2 [Source:MGI Symbol;Acc:MGI:1349723]
#INFO:	BIOGRID_NOIEA NEIGHBOUR:	SNAP25	synaptosomal-associated protein 25 [Source:MGI Symbol;Acc:MGI:98331]
#INFO:	BIOGRID_NOIEA NEIGHBOUR:	UBL7	ubiquitin-like 7 (bone marrow stromal cell-derived) [Source:MGI Symbol;Acc:MGI:1916709]
#INFO:	BIOGRID_NOIEA NEIGHBOUR:	ASCC2	activating signal cointegrator 1 complex subunit 2 [Source:MGI Symbol;Acc:MGI:1922702]
#INFO:	BIOGRID_NOIEA NEIGHBOUR:	PER2	period circadian clock 2 [Source:MGI Symbol;Acc:MGI:1195265]
#INFO:	BIOGRID_NOIEA NEIGHBOUR:	ZRANB3	zinc finger, RAN-binding domain containing 3 [Source:MGI Symbol;Acc:MGI:1918362]
#INFO:	BIOGRID_NOIEA NEIGHBOUR:	CUL3	cullin 3 [Source:MGI Symbol;Acc:MGI:1347360]
#INFO:	BIOGRID_NOIEA NEIGHBOUR:	FCHO1	FCH domain only 1 [Source:MGI Symbol;Acc:MGI:1921265]
#INFO:	BIOGRID_NOIEA NEIGHBOUR:	RPS14	ribosomal protein S14 [Source:MGI Symbol;Acc:MGI:98107]
#INFO:	BIOGRID_NOIEA NEIGHBOUR:	NLRX1	NLR family member X1 [Source:MGI Symbol;Acc:MGI:2429611]
#INFO:	BIOGRID_NOIEA NEIGHBOUR:	MAP1LC3A	microtubule-associated protein 1 light chain 3 alpha [Source:MGI Symbol;Acc:MGI:1915661]
#INFO:	BIOGRID_NOIEA NEIGHBOUR:	CUEDC1	CUE domain containing 1 [Source:MGI Symbol;Acc:MGI:2144281]
#INFO:	BIOGRID_NOIEA NEIGHBOUR:	RLIM	ring finger protein, LIM domain interacting [Source:MGI Symbol;Acc:MGI:1342291]
#INFO:	BIOGRID_NOIEA NEIGHBOUR:	RIPK2	receptor (TNFRSF)-interacting serine-threonine kinase 2 [Source:MGI Symbol;Acc:MGI:1891456]
#INFO:	BIOGRID_NOIEA NEIGHBOUR:	MAPKAPK2	MAP kinase-activated protein kinase 2 [Source:MGI Symbol;Acc:MGI:109298]
#INFO:	BIOGRID_NOIEA NEIGHBOUR:	PSMB5	proteasome (prosome, macropain) subunit, beta type 5 [Source:MGI Symbol;Acc:MGI:1194513]
#INFO:	BIOGRID_NOIEA NEIGHBOUR:	IFNGR1	interferon gamma receptor 1 [Source:MGI Symbol;Acc:MGI:107655]
#INFO:	BIOGRID_NOIEA NEIGHBOUR:	SMAD2	SMAD family member 2 [Source:MGI Symbol;Acc:MGI:108051]
#INFO:	BIOGRID_NOIEA NEIGHBOUR:	NR3C2	nuclear receptor subfamily 3, group C, member 2 [Source:MGI Symbol;Acc:MGI:99459]
#INFO:	BIOGRID_NOIEA NEIGHBOUR:	TRRAP	transformation/transcription domain-associated protein [Source:MGI Symbol;Acc:MGI:2153272]
#INFO:	BIOGRID_NOIEA NEIGHBOUR:	ATM	ataxia telangiectasia mutated [Source:MGI Symbol;Acc:MGI:107202]
#INFO:	BIOGRID_NOIEA NEIGHBOUR:	NUB1	negative regulator of ubiquitin-like proteins 1 [Source:MGI Symbol;Acc:MGI:1889001]
#INFO:	BIOGRID_NOIEA NEIGHBOUR:	PSMC5	protease (prosome, macropain) 26S subunit, ATPase 5 [Source:MGI Symbol;Acc:MGI:105047]
#INFO:	BIOGRID_NOIEA NEIGHBOUR:	MRPL49	mitochondrial ribosomal protein L49 [Source:MGI Symbol;Acc:MGI:108180]
#INFO:	BIOGRID_NOIEA NEIGHBOUR:	IRS4	insulin receptor substrate 4 [Source:MGI Symbol;Acc:MGI:1338009]
#INFO:	BIOGRID_NOIEA NEIGHBOUR:	ACP1	acid phosphatase 1, soluble [Source:MGI Symbol;Acc:MGI:87881]
#INFO:	BIOGRID_NOIEA NEIGHBOUR:	RELA	v-rel reticuloendotheliosis viral oncogene homolog A (avian) [Source:MGI Symbol;Acc:MGI:103290]
#INFO:	BIOGRID_NOIEA NEIGHBOUR:	PSMD14	proteasome (prosome, macropain) 26S subunit, non-ATPase, 14 [Source:MGI Symbol;Acc:MGI:1913284]
#INFO:	BIOGRID_NOIEA NEIGHBOUR:	TLR4	toll-like receptor 4 [Source:MGI Symbol;Acc:MGI:96824]
#INFO:	BIOGRID_NOIEA NEIGHBOUR:	FBXL3	F-box and leucine-rich repeat protein 3 [Source:MGI Symbol;Acc:MGI:1354702]
#INFO:	BIOGRID_NOIEA NEIGHBOUR:	HSPB1	heat shock protein 1 [Source:MGI Symbol;Acc:MGI:96240]
#INFO:	BIOGRID_NOIEA NEIGHBOUR:	SLC25A31	solute carrier family 25 (mitochondrial carrier; adenine nucleotide translocator), member 31 [Source:MGI Symbol;Acc:MGI:1920583]
#INFO:	BIOGRID_NOIEA NEIGHBOUR:	ALPL	alkaline phosphatase, liver/bone/kidney [Source:MGI Symbol;Acc:MGI:87983]
#INFO:	BIOGRID_NOIEA NEIGHBOUR:	HNRNPD	heterogeneous nuclear ribonucleoprotein D [Source:MGI Symbol;Acc:MGI:101947]
#INFO:	BIOGRID_NOIEA NEIGHBOUR:	HDAC5	histone deacetylase 5 [Source:MGI Symbol;Acc:MGI:1333784]
#INFO:	BIOGRID_NOIEA NEIGHBOUR:	SDCBP	syndecan binding protein [Source:MGI Symbol;Acc:MGI:1337026]
#INFO:	BIOGRID_NOIEA NEIGHBOUR:	LIMS1	LIM and senescent cell antigen-like domains 1 [Source:MGI Symbol;Acc:MGI:1195263]
#INFO:	BIOGRID_NOIEA NEIGHBOUR:	CDK1	cyclin-dependent kinase 1 [Source:MGI Symbol;Acc:MGI:88351]
#INFO:	BIOGRID_NOIEA NEIGHBOUR:	NFE2L2	nuclear factor, erythroid derived 2, like 2 [Source:MGI Symbol;Acc:MGI:108420]
#INFO:	BIOGRID_NOIEA NEIGHBOUR:	RPL38	ribosomal protein L38 [Source:MGI Symbol;Acc:MGI:1914921]
#INFO:	BIOGRID_NOIEA NEIGHBOUR:	DMAP1	DNA methyltransferase 1-associated protein 1 [Source:MGI Symbol;Acc:MGI:1913483]
#INFO:	BIOGRID_NOIEA NEIGHBOUR:	HIST2H2AC	histone cluster 2, H2ac [Source:MGI Symbol;Acc:MGI:2448316]
#INFO:	BIOGRID_NOIEA NEIGHBOUR:	MRPS26	mitochondrial ribosomal protein S26 [Source:MGI Symbol;Acc:MGI:1333830]
#INFO:	BIOGRID_NOIEA NEIGHBOUR:	DMRT2	doublesex and mab-3 related transcription factor 2 [Source:MGI Symbol;Acc:MGI:1330307]
#INFO:	BIOGRID_NOIEA NEIGHBOUR:	HERC1	HECT and RLD domain containing E3 ubiquitin protein ligase family member 1 [Source:MGI Symbol;Acc:MGI:2384589]
#INFO:	BIOGRID_NOIEA NEIGHBOUR:	MRPL38	mitochondrial ribosomal protein L38 [Source:MGI Symbol;Acc:MGI:1926269]
#INFO:	BIOGRID_NOIEA NEIGHBOUR:	RNF115	ring finger protein 115 [Source:MGI Symbol;Acc:MGI:1915095]
#INFO:	BIOGRID_NOIEA NEIGHBOUR:	BRAP	BRCA1 associated protein [Source:MGI Symbol;Acc:MGI:1919649]
#INFO:	BIOGRID_NOIEA NEIGHBOUR:	ERCC4	excision repair cross-complementing rodent repair deficiency, complementation group 4 [Source:MGI Symbol;Acc:MGI:1354163]
#INFO:	BIOGRID_NOIEA NEIGHBOUR:	STAT2	signal transducer and activator of transcription 2 [Source:MGI Symbol;Acc:MGI:103039]
#INFO:	BIOGRID_NOIEA NEIGHBOUR:	USP8	ubiquitin specific peptidase 8 [Source:MGI Symbol;Acc:MGI:1934029]
#INFO:	BIOGRID_NOIEA NEIGHBOUR:	RECQL	RecQ protein-like [Source:MGI Symbol;Acc:MGI:103021]
#INFO:	BIOGRID_NOIEA NEIGHBOUR:	MYO1E	myosin IE [Source:MGI Symbol;Acc:MGI:106621]
#INFO:	BIOGRID_NOIEA NEIGHBOUR:	RPL22	ribosomal protein L22 [Source:MGI Symbol;Acc:MGI:99262]
#INFO:	BIOGRID_NOIEA NEIGHBOUR:	HSPA5	heat shock protein 5 [Source:MGI Symbol;Acc:MGI:95835]
#INFO:	BIOGRID_NOIEA NEIGHBOUR:	FLNB	filamin, beta [Source:MGI Symbol;Acc:MGI:2446089]
#INFO:	BIOGRID_NOIEA NEIGHBOUR:	DTYMK	deoxythymidylate kinase [Source:MGI Symbol;Acc:MGI:108396]
#INFO:	BIOGRID_NOIEA NEIGHBOUR:	RPL18A	ribosomal protein L18A [Source:MGI Symbol;Acc:MGI:1924058]
#INFO:	BIOGRID_NOIEA NEIGHBOUR:	VPS72	vacuolar protein sorting 72 [Source:MGI Symbol;Acc:MGI:1202305]
#INFO:	BIOGRID_NOIEA NEIGHBOUR:	ZCCHC10	zinc finger, CCHC domain containing 10 [Source:MGI Symbol;Acc:MGI:1196228]
#INFO:	BIOGRID_NOIEA NEIGHBOUR:	IIGP1	interferon inducible GTPase 1 [Source:MGI Symbol;Acc:MGI:1926259]
#INFO:	BIOGRID_NOIEA NEIGHBOUR:	AP3D1	adaptor-related protein complex 3, delta 1 subunit [Source:MGI Symbol;Acc:MGI:107734]
#INFO:	BIOGRID_NOIEA NEIGHBOUR:	PCMTD1	protein-L-isoaspartate (D-aspartate) O-methyltransferase domain containing 1 [Source:MGI Symbol;Acc:MGI:2441773]
#INFO:	BIOGRID_NOIEA NEIGHBOUR:	ZFAND2A	zinc finger, AN1-type domain 2A [Source:MGI Symbol;Acc:MGI:2140729]
#INFO:	BIOGRID_NOIEA NEIGHBOUR:	CAV1	caveolin 1, caveolae protein [Source:MGI Symbol;Acc:MGI:102709]
#INFO:	BIOGRID_NOIEA NEIGHBOUR:	GGA1	golgi associated, gamma adaptin ear containing, ARF binding protein 1 [Source:MGI Symbol;Acc:MGI:2146207]
#INFO:	BIOGRID_NOIEA NEIGHBOUR:	HSD17B12	hydroxysteroid (17-beta) dehydrogenase 12 [Source:MGI Symbol;Acc:MGI:1926967]
#INFO:	BIOGRID_NOIEA NEIGHBOUR:	TUBB3	tubulin, beta 3 class III [Source:MGI Symbol;Acc:MGI:107813]
#INFO:	BIOGRID_NOIEA NEIGHBOUR:	SHANK3	SH3/ankyrin domain gene 3 [Source:MGI Symbol;Acc:MGI:1930016]
#INFO:	BIOGRID_NOIEA NEIGHBOUR:	RRBP1	ribosome binding protein 1 [Source:MGI Symbol;Acc:MGI:1932395]
#INFO:	BIOGRID_NOIEA NEIGHBOUR:	SPTBN1	spectrin beta, non-erythrocytic 1 [Source:MGI Symbol;Acc:MGI:98388]
#INFO:	BIOGRID_NOIEA NEIGHBOUR:	PPM1B	protein phosphatase 1B, magnesium dependent, beta isoform [Source:MGI Symbol;Acc:MGI:101841]
#INFO:	BIOGRID_NOIEA NEIGHBOUR:	RPS2	ribosomal protein S2 [Source:MGI Symbol;Acc:MGI:105110]
#INFO:	BIOGRID_NOIEA NEIGHBOUR:	STAM2	signal transducing adaptor molecule (SH3 domain and ITAM motif) 2 [Source:MGI Symbol;Acc:MGI:1929100]
#INFO:	BIOGRID_NOIEA NEIGHBOUR:	REG1	regenerating islet-derived 1 [Source:MGI Symbol;Acc:MGI:97895]
#INFO:	BIOGRID_NOIEA NEIGHBOUR:	LIMA1	LIM domain and actin binding 1 [Source:MGI Symbol;Acc:MGI:1920992]
#INFO:	BIOGRID_NOIEA NEIGHBOUR:	SMARCA4	SWI/SNF related, matrix associated, actin dependent regulator of chromatin, subfamily a, member 4 [Source:MGI Symbol;Acc:MGI:88192]
#INFO:	BIOGRID_NOIEA NEIGHBOUR:	RPL8	ribosomal protein L8 [Source:MGI Symbol;Acc:MGI:1350927]
#INFO:	BIOGRID_NOIEA NEIGHBOUR:	FLII	flightless I actin binding protein [Source:MGI Symbol;Acc:MGI:1342286]
#INFO:	BIOGRID_NOIEA NEIGHBOUR:	UBE2G1	ubiquitin-conjugating enzyme E2G 1 [Source:MGI Symbol;Acc:MGI:1914378]
#INFO:	BIOGRID_NOIEA NEIGHBOUR:	SYNCRIP	synaptotagmin binding, cytoplasmic RNA interacting protein [Source:MGI Symbol;Acc:MGI:1891690]
#INFO:	BIOGRID_NOIEA NEIGHBOUR:	TBL3	transducin (beta)-like 3 [Source:MGI Symbol;Acc:MGI:2384863]
#INFO:	BIOGRID_NOIEA NEIGHBOUR:	RIOK3	RIO kinase 3 [Source:MGI Symbol;Acc:MGI:1914128]
#INFO:	BIOGRID_NOIEA NEIGHBOUR:	DLGAP1	discs, large (Drosophila) homolog-associated protein 1 [Source:MGI Symbol;Acc:MGI:1346065]
#INFO:	BIOGRID_NOIEA NEIGHBOUR:	LRP2	low density lipoprotein receptor-related protein 2 [Source:MGI Symbol;Acc:MGI:95794]
#INFO:	BIOGRID_NOIEA NEIGHBOUR:	PTPRF	protein tyrosine phosphatase, receptor type, F [Source:MGI Symbol;Acc:MGI:102695]
#INFO:	BIOGRID_NOIEA NEIGHBOUR:	TONSL	tonsoku-like, DNA repair protein [Source:MGI Symbol;Acc:MGI:1919999]
#INFO:	BIOGRID_NOIEA NEIGHBOUR:	FANCD2	Fanconi anemia, complementation group D2 [Source:MGI Symbol;Acc:MGI:2448480]
#INFO:	BIOGRID_NOIEA NEIGHBOUR:	NTRK1	neurotrophic tyrosine kinase, receptor, type 1 [Source:MGI Symbol;Acc:MGI:97383]
#INFO:	BIOGRID_NOIEA NEIGHBOUR:	RPL34	ribosomal protein L34 [Source:MGI Symbol;Acc:MGI:1915686]
#INFO:	BIOGRID_NOIEA NEIGHBOUR:	IRAK1	interleukin-1 receptor-associated kinase 1 [Source:MGI Symbol;Acc:MGI:107420]
#INFO:	BIOGRID_NOIEA NEIGHBOUR:	PSMG2	proteasome (prosome, macropain) assembly chaperone 2 [Source:MGI Symbol;Acc:MGI:1922901]
#INFO:	BIOGRID_NOIEA NEIGHBOUR:	MORC3	microrchidia 3 [Source:MGI Symbol;Acc:MGI:2136841]
#INFO:	BIOGRID_NOIEA NEIGHBOUR:	PIN1	protein (peptidyl-prolyl cis/trans isomerase) NIMA-interacting 1 [Source:MGI Symbol;Acc:MGI:1346036]
#INFO:	BIOGRID_NOIEA NEIGHBOUR:	EBP	phenylalkylamine Ca2+ antagonist (emopamil) binding protein [Source:MGI Symbol;Acc:MGI:107822]
#INFO:	BIOGRID_NOIEA NEIGHBOUR:	RPL5	ribosomal protein L5 [Source:MGI Symbol;Acc:MGI:102854]
#INFO:	BIOGRID_NOIEA NEIGHBOUR:	USP11	ubiquitin specific peptidase 11 [Source:MGI Symbol;Acc:MGI:2384312]
#INFO:	BIOGRID_NOIEA NEIGHBOUR:	MYO5A	myosin VA [Source:MGI Symbol;Acc:MGI:105976]
#INFO:	BIOGRID_NOIEA NEIGHBOUR:	CEBPA	CCAAT/enhancer binding protein (C/EBP), alpha [Source:MGI Symbol;Acc:MGI:99480]
#INFO:	BIOGRID_NOIEA NEIGHBOUR:	MYSM1	myb-like, SWIRM and MPN domains 1 [Source:MGI Symbol;Acc:MGI:2444584]
#INFO:	BIOGRID_NOIEA NEIGHBOUR:	XRCC6	X-ray repair complementing defective repair in Chinese hamster cells 6 [Source:MGI Symbol;Acc:MGI:95606]
#INFO:	BIOGRID_NOIEA NEIGHBOUR:	PSMD6	proteasome (prosome, macropain) 26S subunit, non-ATPase, 6 [Source:MGI Symbol;Acc:MGI:1913663]
#INFO:	BIOGRID_NOIEA NEIGHBOUR:	MLEC	malectin [Source:MGI Symbol;Acc:MGI:1924015]
#INFO:	BIOGRID_NOIEA NEIGHBOUR:	DIMT1	DIM1 dimethyladenosine transferase 1-like (S. cerevisiae) [Source:MGI Symbol;Acc:MGI:1913504]
#INFO:	BIOGRID_NOIEA NEIGHBOUR:	SRP68	signal recognition particle 68 [Source:MGI Symbol;Acc:MGI:1917447]
#INFO:	BIOGRID_NOIEA NEIGHBOUR:	NEURL4	neuralized E3 ubiquitin protein ligase 4 [Source:MGI Symbol;Acc:MGI:1921092]
#INFO:	BIOGRID_NOIEA NEIGHBOUR:	USP24	ubiquitin specific peptidase 24 [Source:MGI Symbol;Acc:MGI:1919936]
#INFO:	BIOGRID_NOIEA NEIGHBOUR:	STAT3	signal transducer and activator of transcription 3 [Source:MGI Symbol;Acc:MGI:103038]
#INFO:	BIOGRID_NOIEA NEIGHBOUR:	PTPRQ	protein tyrosine phosphatase, receptor type, Q [Source:MGI Symbol;Acc:MGI:1096349]
#INFO:	BIOGRID_NOIEA NEIGHBOUR:	MRPL15	mitochondrial ribosomal protein L15 [Source:MGI Symbol;Acc:MGI:1351639]
#INFO:	BIOGRID_NOIEA NEIGHBOUR:	USP3	ubiquitin specific peptidase 3 [Source:MGI Symbol;Acc:MGI:2152450]
#INFO:	BIOGRID_NOIEA NEIGHBOUR:	DST	dystonin [Source:MGI Symbol;Acc:MGI:104627]
#INFO:	BIOGRID_NOIEA NEIGHBOUR:	NBR1	neighbor of Brca1 gene 1 [Source:MGI Symbol;Acc:MGI:108498]
#INFO:	BIOGRID_NOIEA NEIGHBOUR:	SRP14	signal recognition particle 14 [Source:MGI Symbol;Acc:MGI:107169]
#INFO:	BIOGRID_NOIEA NEIGHBOUR:	STAT5B	signal transducer and activator of transcription 5B [Source:MGI Symbol;Acc:MGI:103035]
#INFO:	BIOGRID_NOIEA NEIGHBOUR:	DLG3	discs, large homolog 3 (Drosophila) [Source:MGI Symbol;Acc:MGI:1888986]
#INFO:	BIOGRID_NOIEA NEIGHBOUR:	CSF1R	colony stimulating factor 1 receptor [Source:MGI Symbol;Acc:MGI:1339758]
#INFO:	BIOGRID_NOIEA NEIGHBOUR:	DOCK2	dedicator of cyto-kinesis 2 [Source:MGI Symbol;Acc:MGI:2149010]
#INFO:	BIOGRID_NOIEA NEIGHBOUR:	GRIP1	glutamate receptor interacting protein 1 [Source:MGI Symbol;Acc:MGI:1921303]
#INFO:	BIOGRID_NOIEA NEIGHBOUR:	PSMD10	proteasome (prosome, macropain) 26S subunit, non-ATPase, 10 [Source:MGI Symbol;Acc:MGI:1858898]
#INFO:	BIOGRID_NOIEA NEIGHBOUR:	APPBP2	amyloid beta precursor protein (cytoplasmic tail) binding protein 2 [Source:MGI Symbol;Acc:MGI:1914134]
#INFO:	BIOGRID_NOIEA NEIGHBOUR:	IDH2	isocitrate dehydrogenase 2 (NADP+), mitochondrial [Source:MGI Symbol;Acc:MGI:96414]
#INFO:	BIOGRID_NOIEA NEIGHBOUR:	LRRFIP2	leucine rich repeat (in FLII) interacting protein 2 [Source:MGI Symbol;Acc:MGI:1918518]
#INFO:	BIOGRID_NOIEA NEIGHBOUR:	DDX17	DEAD (Asp-Glu-Ala-Asp) box polypeptide 17 [Source:MGI Symbol;Acc:MGI:1914290]
#INFO:	BIOGRID_NOIEA NEIGHBOUR:	RARS	arginyl-tRNA synthetase [Source:MGI Symbol;Acc:MGI:1914297]
#INFO:	BIOGRID_NOIEA NEIGHBOUR:	GATA4	GATA binding protein 4 [Source:MGI Symbol;Acc:MGI:95664]
#INFO:	BIOGRID_NOIEA NEIGHBOUR:	RABEP2	rabaptin, RAB GTPase binding effector protein 2 [Source:MGI Symbol;Acc:MGI:1917564]
#INFO:	BIOGRID_NOIEA NEIGHBOUR:	PSMD7	proteasome (prosome, macropain) 26S subunit, non-ATPase, 7 [Source:MGI Symbol;Acc:MGI:1351511]
#INFO:	BIOGRID_NOIEA NEIGHBOUR:	RPL27	ribosomal protein L27 [Source:MGI Symbol;Acc:MGI:98036]
#INFO:	BIOGRID_NOIEA NEIGHBOUR:	USP16	ubiquitin specific peptidase 16 [Source:MGI Symbol;Acc:MGI:1921362]
#INFO:	BIOGRID_NOIEA NEIGHBOUR:	ZC3HAV1	zinc finger CCCH type, antiviral 1 [Source:MGI Symbol;Acc:MGI:1926031]
#INFO:	BIOGRID_NOIEA NEIGHBOUR:	UBAP1	ubiquitin-associated protein 1 [Source:MGI Symbol;Acc:MGI:2149543]
#INFO:	BIOGRID_NOIEA NEIGHBOUR:	BRCA1	breast cancer 1, early onset [Source:MGI Symbol;Acc:MGI:104537]
#INFO:	BIOGRID_NOIEA NEIGHBOUR:	SRSF3	serine/arginine-rich splicing factor 3 [Source:MGI Symbol;Acc:MGI:98285]
#INFO:	BIOGRID_NOIEA NEIGHBOUR:	NIPSNAP1	nipsnap homolog 1 [Source:MGI Symbol;Acc:MGI:1278344]
#INFO:	BIOGRID_NOIEA NEIGHBOUR:	HSPE1	heat shock protein 1 (chaperonin 10) [Source:MGI Symbol;Acc:MGI:104680]
#INFO:	BIOGRID_NOIEA NEIGHBOUR:	HNRNPF	heterogeneous nuclear ribonucleoprotein F [Source:MGI Symbol;Acc:MGI:2138741]
#INFO:	BIOGRID_NOIEA NEIGHBOUR:	PIK3R1	phosphoinositide-3-kinase regulatory subunit 1 [Source:MGI Symbol;Acc:MGI:97583]
#INFO:	BIOGRID_NOIEA NEIGHBOUR:	LUC7L3	LUC7-like 3 (S. cerevisiae) [Source:MGI Symbol;Acc:MGI:1914934]
#INFO:	BIOGRID_NOIEA NEIGHBOUR:	MRPL23	mitochondrial ribosomal protein L23 [Source:MGI Symbol;Acc:MGI:1196612]
#INFO:	BIOGRID_NOIEA NEIGHBOUR:	ZC3HAV1L	zinc finger CCCH-type, antiviral 1-like [Source:MGI Symbol;Acc:MGI:2443387]
#INFO:	BIOGRID_NOIEA NEIGHBOUR:	IQGAP1	IQ motif containing GTPase activating protein 1 [Source:MGI Symbol;Acc:MGI:1352757]
#INFO:	BIOGRID_NOIEA NEIGHBOUR:	RPLP2	ribosomal protein, large P2 [Source:MGI Symbol;Acc:MGI:1914436]
#INFO:	BIOGRID_NOIEA NEIGHBOUR:	OTUD4	OTU domain containing 4 [Source:MGI Symbol;Acc:MGI:1098801]
#INFO:	BIOGRID_NOIEA NEIGHBOUR:	COPS4	COP9 signalosome subunit 4 [Source:MGI Symbol;Acc:MGI:1349414]
#INFO:	BIOGRID_NOIEA NEIGHBOUR:	DNMT1	DNA methyltransferase (cytosine-5) 1 [Source:MGI Symbol;Acc:MGI:94912]
#INFO:	BIOGRID_NOIEA NEIGHBOUR:	RNF138	ring finger protein 138 [Source:MGI Symbol;Acc:MGI:1929211]
#INFO:	BIOGRID_NOIEA NEIGHBOUR:	TCOF1	treacle ribosome biogenesis factor 1 [Source:MGI Symbol;Acc:MGI:892003]
#INFO:	BIOGRID_NOIEA NEIGHBOUR:	PSMB3	proteasome (prosome, macropain) subunit, beta type 3 [Source:MGI Symbol;Acc:MGI:1347014]
#INFO:	BIOGRID_NOIEA NEIGHBOUR:	HSPA9	heat shock protein 9 [Source:MGI Symbol;Acc:MGI:96245]
#INFO:	BIOGRID_NOIEA NEIGHBOUR:	MCL1	myeloid cell leukemia sequence 1 [Source:MGI Symbol;Acc:MGI:101769]
#INFO:	BIOGRID_NOIEA NEIGHBOUR:	MKS1	Meckel syndrome, type 1 [Source:MGI Symbol;Acc:MGI:3584243]
#INFO:	BIOGRID_NOIEA NEIGHBOUR:	DERL1	Der1-like domain family, member 1 [Source:MGI Symbol;Acc:MGI:1915069]
#INFO:	BIOGRID_NOIEA NEIGHBOUR:	RGS19	regulator of G-protein signaling 19 [Source:MGI Symbol;Acc:MGI:1915153]
#INFO:	BIOGRID_NOIEA NEIGHBOUR:	SHC1	src homology 2 domain-containing transforming protein C1 [Source:MGI Symbol;Acc:MGI:98296]
#INFO:	BIOGRID_NOIEA NEIGHBOUR:	DCX	doublecortin [Source:MGI Symbol;Acc:MGI:1277171]
#INFO:	BIOGRID_NOIEA NEIGHBOUR:	NF2	neurofibromin 2 [Source:MGI Symbol;Acc:MGI:97307]
#INFO:	BIOGRID_NOIEA NEIGHBOUR:	TSG101	tumor susceptibility gene 101 [Source:MGI Symbol;Acc:MGI:106581]
#INFO:	BIOGRID_NOIEA NEIGHBOUR:	HUWE1	HECT, UBA and WWE domain containing 1 [Source:MGI Symbol;Acc:MGI:1926884]
#INFO:	BIOGRID_NOIEA NEIGHBOUR:	SSSCA1	Sjogren syndrome/scleroderma autoantigen 1 [Source:MGI Symbol;Acc:MGI:1913482]
#INFO:	BIOGRID_NOIEA NEIGHBOUR:	SCNN1B	sodium channel, nonvoltage-gated 1 beta [Source:MGI Symbol;Acc:MGI:104696]
#INFO:	BIOGRID_NOIEA NEIGHBOUR:	BARD1	BRCA1 associated RING domain 1 [Source:MGI Symbol;Acc:MGI:1328361]
#INFO:	BIOGRID_NOIEA NEIGHBOUR:	CDC34	cell division cycle 34 [Source:MGI Symbol;Acc:MGI:102657]
#INFO:	BIOGRID_NOIEA NEIGHBOUR:	PDPK1	3-phosphoinositide dependent protein kinase 1 [Source:MGI Symbol;Acc:MGI:1338068]
#INFO:	BIOGRID_NOIEA NEIGHBOUR:	KIF1A	kinesin family member 1A [Source:MGI Symbol;Acc:MGI:108391]
#INFO:	BIOGRID_NOIEA NEIGHBOUR:	VCPIP1	valosin containing protein (p97)/p47 complex interacting protein 1 [Source:MGI Symbol;Acc:MGI:1917925]
#INFO:	BIOGRID_NOIEA NEIGHBOUR:	APLP2	amyloid beta (A4) precursor-like protein 2 [Source:MGI Symbol;Acc:MGI:88047]
#INFO:	BIOGRID_NOIEA NEIGHBOUR:	POLK	polymerase (DNA directed), kappa [Source:MGI Symbol;Acc:MGI:1349767]
#INFO:	BIOGRID_NOIEA NEIGHBOUR:	CCAR1	cell division cycle and apoptosis regulator 1 [Source:MGI Symbol;Acc:MGI:1914750]
#INFO:	BIOGRID_NOIEA NEIGHBOUR:	RNF31	ring finger protein 31 [Source:MGI Symbol;Acc:MGI:1934704]
#INFO:	BIOGRID_NOIEA NEIGHBOUR:	TUBB2B	tubulin, beta 2B class IIB [Source:MGI Symbol;Acc:MGI:1920960]
#INFO:	BIOGRID_NOIEA NEIGHBOUR:	CRLF2	cytokine receptor-like factor 2 [Source:MGI Symbol;Acc:MGI:1889506]
#INFO:	BIOGRID_NOIEA NEIGHBOUR:	PRLR	prolactin receptor [Source:MGI Symbol;Acc:MGI:97763]
#INFO:	BIOGRID_NOIEA NEIGHBOUR:	HSPA8	heat shock protein 8 [Source:MGI Symbol;Acc:MGI:105384]
#INFO:	BIOGRID_NOIEA NEIGHBOUR:	CUL4A	cullin 4A [Source:MGI Symbol;Acc:MGI:1914487]
#INFO:	BIOGRID_NOIEA NEIGHBOUR:	TBX6	T-box 6 [Source:MGI Symbol;Acc:MGI:102539]
#INFO:	BIOGRID_NOIEA NEIGHBOUR:	SH3GL2	SH3-domain GRB2-like 2 [Source:MGI Symbol;Acc:MGI:700009]
#INFO:	BIOGRID_NOIEA NEIGHBOUR:	LACTB	lactamase, beta [Source:MGI Symbol;Acc:MGI:1933395]
#INFO:	BIOGRID_NOIEA NEIGHBOUR:	VPS36	vacuolar protein sorting 36 [Source:MGI Symbol;Acc:MGI:1917410]
#INFO:	BIOGRID_NOIEA NEIGHBOUR:	TRIM32	tripartite motif-containing 32 [Source:MGI Symbol;Acc:MGI:1917057]
#INFO:	BIOGRID_NOIEA NEIGHBOUR:	CFAP36	cilia and flagella associated protein 36 [Source:MGI Symbol;Acc:MGI:1913994]
#INFO:	BIOGRID_NOIEA NEIGHBOUR:	CCDC14	coiled-coil domain containing 14 [Source:MGI Symbol;Acc:MGI:2443448]
#INFO:	BIOGRID_NOIEA NEIGHBOUR:	ATXN1	ataxin 1 [Source:MGI Symbol;Acc:MGI:104783]
#INFO:	BIOGRID_NOIEA NEIGHBOUR:	USP46	ubiquitin specific peptidase 46 [Source:MGI Symbol;Acc:MGI:1916977]
#INFO:	BIOGRID_NOIEA NEIGHBOUR:	BCL3	B cell leukemia/lymphoma 3 [Source:MGI Symbol;Acc:MGI:88140]
#INFO:	BIOGRID_NOIEA NEIGHBOUR:	ARGLU1	arginine and glutamate rich 1 [Source:MGI Symbol;Acc:MGI:2442985]
#INFO:	BIOGRID_NOIEA NEIGHBOUR:	ABCE1	ATP-binding cassette, sub-family E (OABP), member 1 [Source:MGI Symbol;Acc:MGI:1195458]
#INFO:	BIOGRID_NOIEA NEIGHBOUR:	BID	BH3 interacting domain death agonist [Source:MGI Symbol;Acc:MGI:108093]
#INFO:	BIOGRID_NOIEA NEIGHBOUR:	ZFYVE19	zinc finger, FYVE domain containing 19 [Source:MGI Symbol;Acc:MGI:1919258]
#INFO:	BIOGRID_NOIEA NEIGHBOUR:	GPS1	G protein pathway suppressor 1 [Source:MGI Symbol;Acc:MGI:2384801]
#INFO:	BIOGRID_NOIEA NEIGHBOUR:	RPL19	ribosomal protein L19 [Source:MGI Symbol;Acc:MGI:98020]
#INFO:	BIOGRID_NOIEA NEIGHBOUR:	PITX2	paired-like homeodomain transcription factor 2 [Source:MGI Symbol;Acc:MGI:109340]
#INFO:	BIOGRID_NOIEA NEIGHBOUR:	FOXO3	forkhead box O3 [Source:MGI Symbol;Acc:MGI:1890081]
#INFO:	BIOGRID_NOIEA NEIGHBOUR:	OAS3	2'-5' oligoadenylate synthetase 3 [Source:MGI Symbol;Acc:MGI:2180850]
#INFO:	BIOGRID_NOIEA NEIGHBOUR:	PTPN1	protein tyrosine phosphatase, non-receptor type 1 [Source:MGI Symbol;Acc:MGI:97805]
#INFO:	BIOGRID_NOIEA NEIGHBOUR:	ARHGEF2	rho/rac guanine nucleotide exchange factor (GEF) 2 [Source:MGI Symbol;Acc:MGI:103264]
#INFO:	BIOGRID_NOIEA NEIGHBOUR:	UBXN7	UBX domain protein 7 [Source:MGI Symbol;Acc:MGI:2146388]
#INFO:	BIOGRID_NOIEA NEIGHBOUR:	ARHGAP35	Rho GTPase activating protein 35 [Source:MGI Symbol;Acc:MGI:1929494]
#INFO:	BIOGRID_NOIEA NEIGHBOUR:	NFE2	nuclear factor, erythroid derived 2 [Source:MGI Symbol;Acc:MGI:97308]
#INFO:	BIOGRID_NOIEA NEIGHBOUR:	USP47	ubiquitin specific peptidase 47 [Source:MGI Symbol;Acc:MGI:1922246]
#INFO:	BIOGRID_NOIEA NEIGHBOUR:	RPS6KB1	ribosomal protein S6 kinase, polypeptide 1 [Source:MGI Symbol;Acc:MGI:1270849]
#INFO:	BIOGRID_NOIEA NEIGHBOUR:	HDLBP	high density lipoprotein (HDL) binding protein [Source:MGI Symbol;Acc:MGI:99256]
#INFO:	BIOGRID_NOIEA NEIGHBOUR:	ZFP330	zinc finger protein 330 [Source:MGI Symbol;Acc:MGI:1353574]
#INFO:	BIOGRID_NOIEA NEIGHBOUR:	ESRRA	estrogen related receptor, alpha [Source:MGI Symbol;Acc:MGI:1346831]
#INFO:	BIOGRID_NOIEA NEIGHBOUR:	PIAS4	protein inhibitor of activated STAT 4 [Source:MGI Symbol;Acc:MGI:2136940]
#INFO:	BIOGRID_NOIEA NEIGHBOUR:	RMI1	RecQ mediated genome instability 1 [Source:MGI Symbol;Acc:MGI:1921636]
#INFO:	BIOGRID_NOIEA NEIGHBOUR:	TARDBP	TAR DNA binding protein [Source:MGI Symbol;Acc:MGI:2387629]
#INFO:	BIOGRID_NOIEA NEIGHBOUR:	D1PAS1	DNA segment, Chr 1, Pasteur Institute 1 [Source:MGI Symbol;Acc:MGI:91842]
#INFO:	BIOGRID_NOIEA NEIGHBOUR:	MYBBP1A	MYB binding protein (P160) 1a [Source:MGI Symbol;Acc:MGI:106181]
#INFO:	BIOGRID_NOIEA NEIGHBOUR:	RPS23	ribosomal protein S23 [Source:MGI Symbol;Acc:MGI:1913725]
#INFO:	BIOGRID_NOIEA NEIGHBOUR:	MORF4L2	mortality factor 4 like 2 [Source:MGI Symbol;Acc:MGI:1927167]
#INFO:	BIOGRID_NOIEA NEIGHBOUR:	ARHGAP29	Rho GTPase activating protein 29 [Source:MGI Symbol;Acc:MGI:2443818]
#INFO:	BIOGRID_NOIEA NEIGHBOUR:	TOLLIP	toll interacting protein [Source:MGI Symbol;Acc:MGI:1891808]
#INFO:	BIOGRID_NOIEA NEIGHBOUR:	MRPS22	mitochondrial ribosomal protein S22 [Source:MGI Symbol;Acc:MGI:1928137]
#INFO:	BIOGRID_NOIEA NEIGHBOUR:	CSDE1	cold shock domain containing E1, RNA binding [Source:MGI Symbol;Acc:MGI:92356]
#INFO:	BIOGRID_NOIEA NEIGHBOUR:	VCP	valosin containing protein [Source:MGI Symbol;Acc:MGI:99919]
#INFO:	BIOGRID_NOIEA NEIGHBOUR:	MYL12B	myosin, light chain 12B, regulatory [Source:MGI Symbol;Acc:MGI:107494]
#INFO:	BIOGRID_NOIEA NEIGHBOUR:	PELI3	pellino 3 [Source:MGI Symbol;Acc:MGI:1924963]
#INFO:	BIOGRID_NOIEA NEIGHBOUR:	RPL13A	ribosomal protein L13A [Source:MGI Symbol;Acc:MGI:1351455]
#INFO:	BIOGRID_NOIEA NEIGHBOUR:	NIFK	nucleolar protein interacting with the FHA domain of MKI67 [Source:MGI Symbol;Acc:MGI:1915199]
#INFO:	BIOGRID_NOIEA NEIGHBOUR:	RUNX2	runt related transcription factor 2 [Source:MGI Symbol;Acc:MGI:99829]
#INFO:	BIOGRID_NOIEA NEIGHBOUR:	NEURL2	neuralized E3 ubiquitin protein ligase 2 [Source:MGI Symbol;Acc:MGI:3043305]
#INFO:	BIOGRID_NOIEA NEIGHBOUR:	PCNA	proliferating cell nuclear antigen [Source:MGI Symbol;Acc:MGI:97503]
#INFO:	BIOGRID_NOIEA NEIGHBOUR:	UBXN2B	UBX domain protein 2B [Source:MGI Symbol;Acc:MGI:1915303]
#INFO:	BIOGRID_NOIEA NEIGHBOUR:	RACK1	receptor for activated C kinase 1 [Source:MGI Symbol;Acc:MGI:101849]
#INFO:	BIOGRID_NOIEA NEIGHBOUR:	APC	adenomatosis polyposis coli [Source:MGI Symbol;Acc:MGI:88039]
#INFO:	BIOGRID_NOIEA NEIGHBOUR:	ABL1	c-abl oncogene 1, non-receptor tyrosine kinase [Source:MGI Symbol;Acc:MGI:87859]
#INFO:	BIOGRID_NOIEA NEIGHBOUR:	REV1	REV1, DNA directed polymerase [Source:MGI Symbol;Acc:MGI:1929074]
#INFO:	BIOGRID_NOIEA NEIGHBOUR:	PABPC4	poly(A) binding protein, cytoplasmic 4 [Source:MGI Symbol;Acc:MGI:2385206]
#INFO:	BIOGRID_NOIEA NEIGHBOUR:	CD79A	CD79A antigen (immunoglobulin-associated alpha) [Source:MGI Symbol;Acc:MGI:101774]
#INFO:	BIOGRID_NOIEA NEIGHBOUR:	TMCO1	transmembrane and coiled-coil domains 1 [Source:MGI Symbol;Acc:MGI:1921173]
#INFO:	BIOGRID_NOIEA NEIGHBOUR:	COPA	coatomer protein complex subunit alpha [Source:MGI Symbol;Acc:MGI:1334462]
#INFO:	BIOGRID_NOIEA NEIGHBOUR:	IPO9	importin 9 [Source:MGI Symbol;Acc:MGI:1918944]
#INFO:	BIOGRID_NOIEA NEIGHBOUR:	DDX56	DEAD (Asp-Glu-Ala-Asp) box polypeptide 56 [Source:MGI Symbol;Acc:MGI:1277172]
#INFO:	BIOGRID_NOIEA NEIGHBOUR:	HDAC1	histone deacetylase 1 [Source:MGI Symbol;Acc:MGI:108086]
#INFO:	BIOGRID_NOIEA NEIGHBOUR:	ZFP451	zinc finger protein 451 [Source:MGI Symbol;Acc:MGI:2137896]
#INFO:	BIOGRID_NOIEA NEIGHBOUR:	ZBTB33	zinc finger and BTB domain containing 33 [Source:MGI Symbol;Acc:MGI:1927290]
#INFO:	BIOGRID_NOIEA NEIGHBOUR:	TRAF6	TNF receptor-associated factor 6 [Source:MGI Symbol;Acc:MGI:108072]
#INFO:	BIOGRID_NOIEA NEIGHBOUR:	DDX5	DEAD (Asp-Glu-Ala-Asp) box polypeptide 5 [Source:MGI Symbol;Acc:MGI:105037]
#INFO:	BIOGRID_NOIEA NEIGHBOUR:	PIK3C2B	phosphatidylinositol-4-phosphate 3-kinase catalytic subunit type 2 beta [Source:MGI Symbol;Acc:MGI:2685045]
#INFO:	BIOGRID_NOIEA NEIGHBOUR:	CDC27	cell division cycle 27 [Source:MGI Symbol;Acc:MGI:102685]
#INFO:	BIOGRID_NOIEA NEIGHBOUR:	HECTD4	HECT domain E3 ubiquitin protein ligase 4 [Source:MGI Symbol;Acc:MGI:3647820]
#INFO:	BIOGRID_NOIEA NEIGHBOUR:	USP19	ubiquitin specific peptidase 19 [Source:MGI Symbol;Acc:MGI:1918722]
#INFO:	BIOGRID_NOIEA NEIGHBOUR:	RAB5C	RAB5C, member RAS oncogene family [Source:MGI Symbol;Acc:MGI:105306]
#INFO:	BIOGRID_NOIEA NEIGHBOUR:	TAL1	T cell acute lymphocytic leukemia 1 [Source:MGI Symbol;Acc:MGI:98480]
#INFO:	BIOGRID_NOIEA NEIGHBOUR:	COPS7A	COP9 signalosome subunit 7A [Source:MGI Symbol;Acc:MGI:1349400]
#INFO:	BIOGRID_NOIEA NEIGHBOUR:	TPM1	tropomyosin 1, alpha [Source:MGI Symbol;Acc:MGI:98809]
#INFO:	BIOGRID_NOIEA NEIGHBOUR:	AKAP2	A kinase (PRKA) anchor protein 2 [Source:MGI Symbol;Acc:MGI:1306795]
#INFO:	BIOGRID_NOIEA NEIGHBOUR:	MEAF6	MYST/Esa1-associated factor 6 [Source:MGI Symbol;Acc:MGI:1917338]
#INFO:	BIOGRID_NOIEA NEIGHBOUR:	PSMD1	proteasome (prosome, macropain) 26S subunit, non-ATPase, 1 [Source:MGI Symbol;Acc:MGI:1917497]
#INFO:	BIOGRID_NOIEA NEIGHBOUR:	GNL3L	guanine nucleotide binding protein-like 3 (nucleolar)-like [Source:MGI Symbol;Acc:MGI:2448557]
#INFO:	BIOGRID_NOIEA NEIGHBOUR:	MYCN	v-myc avian myelocytomatosis viral related oncogene, neuroblastoma derived [Source:MGI Symbol;Acc:MGI:97357]
#INFO:	BIOGRID_NOIEA NEIGHBOUR:	PSMA6	proteasome (prosome, macropain) subunit, alpha type 6 [Source:MGI Symbol;Acc:MGI:1347006]
#INFO:	BIOGRID_NOIEA NEIGHBOUR:	TERT	telomerase reverse transcriptase [Source:MGI Symbol;Acc:MGI:1202709]
#INFO:	BIOGRID_NOIEA NEIGHBOUR:	SRC	Rous sarcoma oncogene [Source:MGI Symbol;Acc:MGI:98397]
#INFO:	BIOGRID_NOIEA NEIGHBOUR:	SLC25A3	solute carrier family 25 (mitochondrial carrier, phosphate carrier), member 3 [Source:MGI Symbol;Acc:MGI:1353498]
#INFO:	BIOGRID_NOIEA NEIGHBOUR:	UCHL4	ubiquitin carboxyl-terminal esterase L4 [Source:MGI Symbol;Acc:MGI:1890440]
#INFO:	BIOGRID_NOIEA NEIGHBOUR:	GRIN2B	glutamate receptor, ionotropic, NMDA2B (epsilon 2) [Source:MGI Symbol;Acc:MGI:95821]
#INFO:	BIOGRID_NOIEA NEIGHBOUR:	LPXN	leupaxin [Source:MGI Symbol;Acc:MGI:2147677]
#INFO:	BIOGRID_NOIEA NEIGHBOUR:	SLC38A2	solute carrier family 38, member 2 [Source:MGI Symbol;Acc:MGI:1915010]
#INFO:	BIOGRID_NOIEA NEIGHBOUR:	LTBP1	latent transforming growth factor beta binding protein 1 [Source:MGI Symbol;Acc:MGI:109151]
#INFO:	BIOGRID_NOIEA NEIGHBOUR:	ELOC	elongin C [Source:MGI Symbol;Acc:MGI:1915173]
#INFO:	BIOGRID_NOIEA NEIGHBOUR:	WRNIP1	Werner helicase interacting protein 1 [Source:MGI Symbol;Acc:MGI:1926153]
#INFO:	BIOGRID_NOIEA NEIGHBOUR:	EIF2S1	eukaryotic translation initiation factor 2, subunit 1 alpha [Source:MGI Symbol;Acc:MGI:95299]
#INFO:	BIOGRID_NOIEA NEIGHBOUR:	ITPR3	inositol 1,4,5-triphosphate receptor 3 [Source:MGI Symbol;Acc:MGI:96624]
#INFO:	BIOGRID_NOIEA NEIGHBOUR:	NR1I3	nuclear receptor subfamily 1, group I, member 3 [Source:MGI Symbol;Acc:MGI:1346307]
#INFO:	BIOGRID_NOIEA NEIGHBOUR:	NOP56	NOP56 ribonucleoprotein [Source:MGI Symbol;Acc:MGI:1914384]
#INFO:	BIOGRID_NOIEA NEIGHBOUR:	SETX	senataxin [Source:MGI Symbol;Acc:MGI:2443480]
#INFO:	BIOGRID_NOIEA NEIGHBOUR:	RANGAP1	RAN GTPase activating protein 1 [Source:MGI Symbol;Acc:MGI:103071]
#INFO:	BIOGRID_NOIEA NEIGHBOUR:	PABPC6	poly(A) binding protein, cytoplasmic 6 [Source:MGI Symbol;Acc:MGI:1914793]
#INFO:	BIOGRID_NOIEA NEIGHBOUR:	MRPL11	mitochondrial ribosomal protein L11 [Source:MGI Symbol;Acc:MGI:2137215]
#INFO:	BIOGRID_NOIEA NEIGHBOUR:	HTT	huntingtin [Source:MGI Symbol;Acc:MGI:96067]
#INFO:	BIOGRID_NOIEA NEIGHBOUR:	SKI	ski sarcoma viral oncogene homolog (avian) [Source:MGI Symbol;Acc:MGI:98310]
#INFO:	BIOGRID_NOIEA NEIGHBOUR:	NPLOC4	NPL4 homolog, ubiquitin recognition factor [Source:MGI Symbol;Acc:MGI:2679787]
#INFO:	BIOGRID_NOIEA NEIGHBOUR:	CUL5	cullin 5 [Source:MGI Symbol;Acc:MGI:1922967]
#INFO:	BIOGRID_NOIEA NEIGHBOUR:	UBE2I	ubiquitin-conjugating enzyme E2I [Source:MGI Symbol;Acc:MGI:107365]
#INFO:	BIOGRID_NOIEA NEIGHBOUR:	TNF	tumor necrosis factor [Source:MGI Symbol;Acc:MGI:104798]
#INFO:	BIOGRID_NOIEA NEIGHBOUR:	OTX2	orthodenticle homeobox 2 [Source:MGI Symbol;Acc:MGI:97451]
#INFO:	BIOGRID_NOIEA NEIGHBOUR:	GGA3	golgi associated, gamma adaptin ear containing, ARF binding protein 3 [Source:MGI Symbol;Acc:MGI:2384159]
#INFO:	BIOGRID_NOIEA NEIGHBOUR:	SLC25A5	solute carrier family 25 (mitochondrial carrier, adenine nucleotide translocator), member 5 [Source:MGI Symbol;Acc:MGI:1353496]
#INFO:	BIOGRID_NOIEA NEIGHBOUR:	LRRK2	leucine-rich repeat kinase 2 [Source:MGI Symbol;Acc:MGI:1913975]
#INFO:	BIOGRID_NOIEA NEIGHBOUR:	CREBBP	CREB binding protein [Source:MGI Symbol;Acc:MGI:1098280]
#INFO:	BIOGRID_NOIEA NEIGHBOUR:	HSPD1	heat shock protein 1 (chaperonin) [Source:MGI Symbol;Acc:MGI:96242]
#INFO:	BIOGRID_NOIEA NEIGHBOUR:	IDO1	indoleamine 2,3-dioxygenase 1 [Source:MGI Symbol;Acc:MGI:96416]
#INFO:	BIOGRID_NOIEA NEIGHBOUR:	UBR5	ubiquitin protein ligase E3 component n-recognin 5 [Source:MGI Symbol;Acc:MGI:1918040]
#INFO:	BIOGRID_NOIEA NEIGHBOUR:	DHX32	DEAH (Asp-Glu-Ala-His) box polypeptide 32 [Source:MGI Symbol;Acc:MGI:2141813]
#INFO:	BIOGRID_NOIEA NEIGHBOUR:	NPHP4	nephronophthisis 4 (juvenile) homolog (human) [Source:MGI Symbol;Acc:MGI:2384210]
#INFO:	BIOGRID_NOIEA NEIGHBOUR:	SRSF1	serine/arginine-rich splicing factor 1 [Source:MGI Symbol;Acc:MGI:98283]
#INFO:	BIOGRID_NOIEA NEIGHBOUR:	PKLR	pyruvate kinase liver and red blood cell [Source:MGI Symbol;Acc:MGI:97604]
#INFO:	BIOGRID_NOIEA NEIGHBOUR:	PRKCSH	protein kinase C substrate 80K-H [Source:MGI Symbol;Acc:MGI:107877]
#INFO:	BIOGRID_NOIEA NEIGHBOUR:	USP48	ubiquitin specific peptidase 48 [Source:MGI Symbol;Acc:MGI:2158502]
#INFO:	BIOGRID_NOIEA NEIGHBOUR:	AK1	adenylate kinase 1 [Source:MGI Symbol;Acc:MGI:87977]
#INFO:	BIOGRID_NOIEA NEIGHBOUR:	EGR2	early growth response 2 [Source:MGI Symbol;Acc:MGI:95296]
#INFO:	BIOGRID_NOIEA NEIGHBOUR:	RIPK1	receptor (TNFRSF)-interacting serine-threonine kinase 1 [Source:MGI Symbol;Acc:MGI:108212]
#INFO:	BIOGRID_NOIEA NEIGHBOUR:	SOX2	SRY (sex determining region Y)-box 2 [Source:MGI Symbol;Acc:MGI:98364]
#INFO:	BIOGRID_NOIEA NEIGHBOUR:	POU5F1	POU domain, class 5, transcription factor 1 [Source:MGI Symbol;Acc:MGI:101893]
#INFO:	BIOGRID_NOIEA NEIGHBOUR:	PSMD13	proteasome (prosome, macropain) 26S subunit, non-ATPase, 13 [Source:MGI Symbol;Acc:MGI:1345192]
#INFO:	BIOGRID_NOIEA NEIGHBOUR:	GPC4	glypican 4 [Source:MGI Symbol;Acc:MGI:104902]
#INFO:	BIOGRID_NOIEA NEIGHBOUR:	PML	promyelocytic leukemia [Source:MGI Symbol;Acc:MGI:104662]
#INFO:	BIOGRID_NOIEA NEIGHBOUR:	HIF1A	hypoxia inducible factor 1, alpha subunit [Source:MGI Symbol;Acc:MGI:106918]
#INFO:	BIOGRID_NOIEA NEIGHBOUR:	XPNPEP3	X-prolyl aminopeptidase 3, mitochondrial [Source:MGI Symbol;Acc:MGI:2445217]
#INFO:	BIOGRID_NOIEA NEIGHBOUR:	MRPL58	mitochondrial ribosomal protein L58 [Source:MGI Symbol;Acc:MGI:1915822]
#INFO:	BIOGRID_NOIEA NEIGHBOUR:	CSNK1E	casein kinase 1, epsilon [Source:MGI Symbol;Acc:MGI:1351660]
#INFO:	BIOGRID_NOIEA NEIGHBOUR:	TRAF3	TNF receptor-associated factor 3 [Source:MGI Symbol;Acc:MGI:108041]
#INFO:	BIOGRID_NOIEA NEIGHBOUR:	ADCK5	aarF domain containing kinase 5 [Source:MGI Symbol;Acc:MGI:2679274]
#INFO:	BIOGRID_NOIEA NEIGHBOUR:	ZAP70	zeta-chain (TCR) associated protein kinase [Source:MGI Symbol;Acc:MGI:99613]
#INFO:	BIOGRID_NOIEA NEIGHBOUR:	PSMC6	proteasome (prosome, macropain) 26S subunit, ATPase, 6 [Source:MGI Symbol;Acc:MGI:1914339]
#INFO:	BIOGRID_NOIEA NEIGHBOUR:	DLAT	dihydrolipoamide S-acetyltransferase (E2 component of pyruvate dehydrogenase complex) [Source:MGI Symbol;Acc:MGI:2385311]
#INFO:	BIOGRID_NOIEA NEIGHBOUR:	ACTA1	actin, alpha 1, skeletal muscle [Source:MGI Symbol;Acc:MGI:87902]
#INFO:	BIOGRID_NOIEA NEIGHBOUR:	JUN	jun proto-oncogene [Source:MGI Symbol;Acc:MGI:96646]
#INFO:	BIOGRID_NOIEA NEIGHBOUR:	IRF8	interferon regulatory factor 8 [Source:MGI Symbol;Acc:MGI:96395]
#INFO:	BIOGRID_NOIEA NEIGHBOUR:	IKBKB	inhibitor of kappaB kinase beta [Source:MGI Symbol;Acc:MGI:1338071]
#INFO:	BIOGRID_NOIEA NEIGHBOUR:	EZH2	enhancer of zeste 2 polycomb repressive complex 2 subunit [Source:MGI Symbol;Acc:MGI:107940]
#INFO:	BIOGRID_NOIEA NEIGHBOUR:	HDX	highly divergent homeobox [Source:MGI Symbol;Acc:MGI:2685226]
#INFO:	BIOGRID_NOIEA NEIGHBOUR:	SFPQ	splicing factor proline/glutamine rich (polypyrimidine tract binding protein associated) [Source:MGI Symbol;Acc:MGI:1918764]
#INFO:	BIOGRID_NOIEA NEIGHBOUR:	MCM5	minichromosome maintenance complex component 5 [Source:MGI Symbol;Acc:MGI:103197]
#INFO:	BIOGRID_NOIEA NEIGHBOUR:	GCH1	GTP cyclohydrolase 1 [Source:MGI Symbol;Acc:MGI:95675]
#INFO:	BIOGRID_NOIEA NEIGHBOUR:	TIMM17B	translocase of inner mitochondrial membrane 17b [Source:MGI Symbol;Acc:MGI:1343176]
#INFO:	BIOGRID_NOIEA NEIGHBOUR:	DDX39B	DEAD (Asp-Glu-Ala-Asp) box polypeptide 39B [Source:MGI Symbol;Acc:MGI:99240]
#INFO:	BIOGRID_NOIEA NEIGHBOUR:	TOM1L2	target of myb1-like 2 (chicken) [Source:MGI Symbol;Acc:MGI:2443306]
#INFO:	BIOGRID_NOIEA NEIGHBOUR:	RPS27	ribosomal protein S27 [Source:MGI Symbol;Acc:MGI:1888676]
#INFO:	BIOGRID_NOIEA NEIGHBOUR:	ASPSCR1	alveolar soft part sarcoma chromosome region, candidate 1 (human) [Source:MGI Symbol;Acc:MGI:1916188]
#INFO:	BIOGRID_NOIEA NEIGHBOUR:	PYCRL	pyrroline-5-carboxylate reductase-like [Source:MGI Symbol;Acc:MGI:1913444]
#INFO:	BIOGRID_NOIEA NEIGHBOUR:	INVS	inversin [Source:MGI Symbol;Acc:MGI:1335082]
#INFO:	BIOGRID_NOIEA NEIGHBOUR:	PLAA	phospholipase A2, activating protein [Source:MGI Symbol;Acc:MGI:104810]
#INFO:	BIOGRID_NOIEA NEIGHBOUR:	NFATC1	nuclear factor of activated T cells, cytoplasmic, calcineurin dependent 1 [Source:MGI Symbol;Acc:MGI:102469]
#INFO:	BIOGRID_NOIEA NEIGHBOUR:	ABCF2	ATP-binding cassette, sub-family F (GCN20), member 2 [Source:MGI Symbol;Acc:MGI:1351657]
#INFO:	BIOGRID_NOIEA NEIGHBOUR:	HIST2H4	histone cluster 1, H4c [Source:MGI Symbol;Acc:MGI:2448421]
#INFO:	BIOGRID_NOIEA NEIGHBOUR:	ITGA5	integrin alpha 5 (fibronectin receptor alpha) [Source:MGI Symbol;Acc:MGI:96604]
#INFO:	BIOGRID_NOIEA NEIGHBOUR:	RPS11	ribosomal protein S11 [Source:MGI Symbol;Acc:MGI:1351329]
#INFO:	BIOGRID_NOIEA NEIGHBOUR:	UBXN1	UBX domain protein 1 [Source:MGI Symbol;Acc:MGI:1289301]
#INFO:	BIOGRID_NOIEA NEIGHBOUR:	SYNJ1	synaptojanin 1 [Source:MGI Symbol;Acc:MGI:1354961]
#INFO:	BIOGRID_NOIEA NEIGHBOUR:	FANCI	Fanconi anemia, complementation group I [Source:MGI Symbol;Acc:MGI:2384790]
#INFO:	BIOGRID_NOIEA NEIGHBOUR:	SLC2A4	solute carrier family 2 (facilitated glucose transporter), member 4 [Source:MGI Symbol;Acc:MGI:95758]
#INFO:	BIOGRID_NOIEA NEIGHBOUR:	BABAM2	BRISC and BRCA1 A complex member 2 [Source:MGI Symbol;Acc:MGI:1333875]
#INFO:	BIOGRID_NOIEA NEIGHBOUR:	POLI	polymerase (DNA directed), iota [Source:MGI Symbol;Acc:MGI:1347081]
#INFO:	BIOGRID_NOIEA NEIGHBOUR:	ITSN1	intersectin 1 (SH3 domain protein 1A) [Source:MGI Symbol;Acc:MGI:1338069]
#INFO:	BIOGRID_NOIEA NEIGHBOUR:	RNF123	ring finger protein 123 [Source:MGI Symbol;Acc:MGI:2148796]
#INFO:	BIOGRID_NOIEA NEIGHBOUR:	EEF1D	eukaryotic translation elongation factor 1 delta (guanine nucleotide exchange protein) [Source:MGI Symbol;Acc:MGI:1913906]
#INFO:	BIOGRID_NOIEA NEIGHBOUR:	GSC	goosecoid homeobox [Source:MGI Symbol;Acc:MGI:95841]
#INFO:	BIOGRID_NOIEA NEIGHBOUR:	TAX1BP1	Tax1 (human T cell leukemia virus type I) binding protein 1 [Source:MGI Symbol;Acc:MGI:1289308]
#INFO:	BIOGRID_NOIEA NEIGHBOUR:	OTUD5	OTU domain containing 5 [Source:MGI Symbol;Acc:MGI:1859615]
#INFO:	BIOGRID_NOIEA NEIGHBOUR:	DIAPH2	diaphanous related formin 2 [Source:MGI Symbol;Acc:MGI:1858500]
#INFO:	BIOGRID_NOIEA NEIGHBOUR:	MYOD1	myogenic differentiation 1 [Source:MGI Symbol;Acc:MGI:97275]
#INFO:	BIOGRID_NOIEA NEIGHBOUR:	DAB1	disabled 1 [Source:MGI Symbol;Acc:MGI:108554]
#INFO:	BIOGRID_NOIEA NEIGHBOUR:	RNF220	ring finger protein 220 [Source:MGI Symbol;Acc:MGI:1913993]
#INFO:	BIOGRID_NOIEA NEIGHBOUR:	RPL35	ribosomal protein L35 [Source:MGI Symbol;Acc:MGI:1913739]
#INFO:	BIOGRID_NOIEA NEIGHBOUR:	MYD88	myeloid differentiation primary response gene 88 [Source:MGI Symbol;Acc:MGI:108005]
#INFO:	BIOGRID_NOIEA NEIGHBOUR:	RPL18	ribosomal protein L18 [Source:MGI Symbol;Acc:MGI:98003]
#INFO:	BIOGRID_NOIEA NEIGHBOUR:	RPL7A	ribosomal protein L7A [Source:MGI Symbol;Acc:MGI:1353472]
#INFO:	BIOGRID_NOIEA NEIGHBOUR:	DDX46	DEAD (Asp-Glu-Ala-Asp) box polypeptide 46 [Source:MGI Symbol;Acc:MGI:1920895]
#INFO:	BIOGRID_NOIEA NEIGHBOUR:	EPC2	enhancer of polycomb homolog 2 (Drosophila) [Source:MGI Symbol;Acc:MGI:1278321]
#INFO:	BIOGRID_NOIEA NEIGHBOUR:	PELI1	pellino 1 [Source:MGI Symbol;Acc:MGI:1914495]
#INFO:	BIOGRID_NOIEA NEIGHBOUR:	TBX5	T-box 5 [Source:MGI Symbol;Acc:MGI:102541]
#INFO:	BIOGRID_NOIEA NEIGHBOUR:	TAB3	TGF-beta activated kinase 1/MAP3K7 binding protein 3 [Source:MGI Symbol;Acc:MGI:1913974]
#INFO:	BIOGRID_NOIEA NEIGHBOUR:	GTF2H4	general transcription factor II H, polypeptide 4 [Source:MGI Symbol;Acc:MGI:1338799]
#INFO:	BIOGRID_NOIEA NEIGHBOUR:	TRAP1A	tumor rejection antigen P1A [Source:MGI Symbol;Acc:MGI:98818]
#INFO:	BIOGRID_NOIEA NEIGHBOUR:	RNF2	ring finger protein 2 [Source:MGI Symbol;Acc:MGI:1101759]
#INFO:	BIOGRID_NOIEA NEIGHBOUR:	DROSHA	drosha, ribonuclease type III [Source:MGI Symbol;Acc:MGI:1261425]
#INFO:	BIOGRID_NOIEA NEIGHBOUR:	PSMA7	proteasome (prosome, macropain) subunit, alpha type 7 [Source:MGI Symbol;Acc:MGI:1347070]
#INFO:	BIOGRID_NOIEA NEIGHBOUR:	SUN2	Sad1 and UNC84 domain containing 2 [Source:MGI Symbol;Acc:MGI:2443011]
#INFO:	BIOGRID_NOIEA NEIGHBOUR:	USP5	ubiquitin specific peptidase 5 (isopeptidase T) [Source:MGI Symbol;Acc:MGI:1347343]
#INFO:	BIOGRID_NOIEA NEIGHBOUR:	BABAM1	BRISC and BRCA1 A complex member 1 [Source:MGI Symbol;Acc:MGI:1915501]
#INFO:	BIOGRID_NOIEA NEIGHBOUR:	MARS	methionine-tRNA synthetase [Source:MGI Symbol;Acc:MGI:1345633]
#INFO:	BIOGRID_NOIEA NEIGHBOUR:	DDI2	DNA-damage inducible protein 2 [Source:MGI Symbol;Acc:MGI:1917244]
#INFO:	BIOGRID_NOIEA NEIGHBOUR:	CCDC92	coiled-coil domain containing 92 [Source:MGI Symbol;Acc:MGI:106485]
#INFO:	BIOGRID_NOIEA NEIGHBOUR:	HNRNPM	heterogeneous nuclear ribonucleoprotein M [Source:MGI Symbol;Acc:MGI:1926465]
#INFO:	BIOGRID_NOIEA NEIGHBOUR:	RPL17	ribosomal protein L17 [Source:MGI Symbol;Acc:MGI:2448270]
#INFO:	BIOGRID_NOIEA NEIGHBOUR:	CASP8	caspase 8 [Source:MGI Symbol;Acc:MGI:1261423]
#INFO:	BIOGRID_NOIEA NEIGHBOUR:	KIT	KIT proto-oncogene receptor tyrosine kinase [Source:MGI Symbol;Acc:MGI:96677]
#INFO:	BIOGRID_NOIEA NEIGHBOUR:	LIPC	lipase, hepatic [Source:MGI Symbol;Acc:MGI:96216]
#INFO:	BIOGRID_NOIEA NEIGHBOUR:	AHI1	Abelson helper integration site 1 [Source:MGI Symbol;Acc:MGI:87971]
#INFO:	BIOGRID_NOIEA NEIGHBOUR:	ITCH	itchy, E3 ubiquitin protein ligase [Source:MGI Symbol;Acc:MGI:1202301]
#INFO:	BIOGRID_NOIEA NEIGHBOUR:	CLPB	ClpB caseinolytic peptidase B [Source:MGI Symbol;Acc:MGI:1100517]
#INFO:	BIOGRID_NOIEA NEIGHBOUR:	OTUD7B	OTU domain containing 7B [Source:MGI Symbol;Acc:MGI:2654703]
#INFO:	BIOGRID_NOIEA NEIGHBOUR:	SCCPDH	saccharopine dehydrogenase (putative) [Source:MGI Symbol;Acc:MGI:1924486]
#INFO:	BIOGRID_NOIEA NEIGHBOUR:	RPL11	ribosomal protein L11 [Source:MGI Symbol;Acc:MGI:1914275]
#INFO:	BIOGRID_NOIEA NEIGHBOUR:	PKM	pyruvate kinase, muscle [Source:MGI Symbol;Acc:MGI:97591]
#INFO:	BIOGRID_NOIEA NEIGHBOUR:	USP2	ubiquitin specific peptidase 2 [Source:MGI Symbol;Acc:MGI:1858178]
#INFO:	BIOGRID_NOIEA NEIGHBOUR:	BCL2	B cell leukemia/lymphoma 2 [Source:MGI Symbol;Acc:MGI:88138]
#INFO:	BIOGRID_NOIEA NEIGHBOUR:	MORF4L1	mortality factor 4 like 1 [Source:MGI Symbol;Acc:MGI:1096551]
#INFO:	BIOGRID_NOIEA NEIGHBOUR:	CD86	CD86 antigen [Source:MGI Symbol;Acc:MGI:101773]
#INFO:	BIOGRID_NOIEA NEIGHBOUR:	TIMM8B	translocase of inner mitochondrial membrane 8B [Source:MGI Symbol;Acc:MGI:1353424]
#INFO:	BIOGRID_NOIEA NEIGHBOUR:	HIST1H2BC	histone cluster 1, H2bc [Source:MGI Symbol;Acc:MGI:1915274]
#INFO:	BIOGRID_NOIEA NEIGHBOUR:	HSPA1B	heat shock protein 1A [Source:MGI Symbol;Acc:MGI:96244]
#INFO:	BIOGRID_NOIEA NEIGHBOUR:	AXIN1	axin 1 [Source:MGI Symbol;Acc:MGI:1096327]
#INFO:	BIOGRID_NOIEA NEIGHBOUR:	FAR1	fatty acyl CoA reductase 1 [Source:MGI Symbol;Acc:MGI:1914670]
#INFO:	BIOGRID_NOIEA NEIGHBOUR:	YBX3	Y box protein 3 [Source:MGI Symbol;Acc:MGI:2137670]
#INFO:	BIOGRID_NOIEA NEIGHBOUR:	UIMC1	ubiquitin interaction motif containing 1 [Source:MGI Symbol;Acc:MGI:103185]
#INFO:	BIOGRID_NOIEA NEIGHBOUR:	ERCC2	excision repair cross-complementing rodent repair deficiency, complementation group 2 [Source:MGI Symbol;Acc:MGI:95413]
#INFO:	BIOGRID_NOIEA NEIGHBOUR:	ULK1	unc-51 like kinase 1 [Source:MGI Symbol;Acc:MGI:1270126]
#INFO:	BIOGRID_NOIEA NEIGHBOUR:	CDKN1A	cyclin-dependent kinase inhibitor 1A (P21) [Source:MGI Symbol;Acc:MGI:104556]
#INFO:	BIOGRID_NOIEA NEIGHBOUR:	PSMA2	proteasome (prosome, macropain) subunit, alpha type 2 [Source:MGI Symbol;Acc:MGI:104885]
#INFO:	BIOGRID_NOIEA NEIGHBOUR:	ARNTL	aryl hydrocarbon receptor nuclear translocator-like [Source:MGI Symbol;Acc:MGI:1096381]
#INFO:	BIOGRID_NOIEA NEIGHBOUR:	PTGES3	prostaglandin E synthase 3 [Source:MGI Symbol;Acc:MGI:1929282]
#INFO:	BIOGRID_NOIEA NEIGHBOUR:	TOM1	target of myb1 trafficking protein [Source:MGI Symbol;Acc:MGI:1338026]
#INFO:	BIOGRID_NOIEA NEIGHBOUR:	KLHDC2	kelch domain containing 2 [Source:MGI Symbol;Acc:MGI:1916804]
#INFO:	BIOGRID_NOIEA NEIGHBOUR:	EGFR	epidermal growth factor receptor [Source:MGI Symbol;Acc:MGI:95294]
#INFO:	BIOGRID_NOIEA NEIGHBOUR:	ERCC6	excision repair cross-complementing rodent repair deficiency, complementation group 6 [Source:MGI Symbol;Acc:MGI:1100494]
#INFO:	BIOGRID_NOIEA NEIGHBOUR:	UBASH3B	ubiquitin associated and SH3 domain containing, B [Source:MGI Symbol;Acc:MGI:1920078]
#INFO:	BIOGRID_NOIEA NEIGHBOUR:	MRPS27	mitochondrial ribosomal protein S27 [Source:MGI Symbol;Acc:MGI:1919064]
#INFO:	BIOGRID_NOIEA NEIGHBOUR:	NONO	non-POU-domain-containing, octamer binding protein [Source:MGI Symbol;Acc:MGI:1855692]
#INFO:	BIOGRID_NOIEA NEIGHBOUR:	SART3	squamous cell carcinoma antigen recognized by T cells 3 [Source:MGI Symbol;Acc:MGI:1858230]
#INFO:	BIOGRID_NOIEA NEIGHBOUR:	TOM1L1	target of myb1-like 1 (chicken) [Source:MGI Symbol;Acc:MGI:1919193]
#INFO:	BIOGRID_NOIEA NEIGHBOUR:	TUBA1B	tubulin, alpha 1B [Source:MGI Symbol;Acc:MGI:107804]
#INFO:	BIOGRID_NOIEA NEIGHBOUR:	CBL	Casitas B-lineage lymphoma [Source:MGI Symbol;Acc:MGI:88279]
#INFO:	BIOGRID_NOIEA NEIGHBOUR:	NPM1	nucleophosmin 1 [Source:MGI Symbol;Acc:MGI:106184]
#INFO:	BIOGRID_NOIEA NEIGHBOUR:	NUMB	numb homolog (Drosophila) [Source:MGI Symbol;Acc:MGI:107423]
#INFO:	BIOGRID_NOIEA NEIGHBOUR:	MAP3K2	mitogen-activated protein kinase kinase kinase 2 [Source:MGI Symbol;Acc:MGI:1346873]
#INFO:	BIOGRID_NOIEA NEIGHBOUR:	NFKBIA	nuclear factor of kappa light polypeptide gene enhancer in B cells inhibitor, alpha [Source:MGI Symbol;Acc:MGI:104741]
#INFO:	BIOGRID_NOIEA NEIGHBOUR:	RPS27L	ribosomal protein S27-like [Source:MGI Symbol;Acc:MGI:1915191]
#INFO:	BIOGRID_NOIEA NEIGHBOUR:	RPS17	ribosomal protein S17 [Source:MGI Symbol;Acc:MGI:1309526]
#INFO:	BIOGRID_NOIEA NEIGHBOUR:	SDF2L1	stromal cell-derived factor 2-like 1 [Source:MGI Symbol;Acc:MGI:2149842]
#INFO:	BIOGRID_NOIEA NEIGHBOUR:	PDP2	pyruvate dehyrogenase phosphatase catalytic subunit 2 [Source:MGI Symbol;Acc:MGI:1918878]
#INFO:	BIOGRID_NOIEA NEIGHBOUR:	TAX1BP3	Tax1 (human T cell leukemia virus type I) binding protein 3 [Source:MGI Symbol;Acc:MGI:1923531]
#INFO:	BIOGRID_NOIEA NEIGHBOUR:	IBTK	inhibitor of Bruton agammaglobulinemia tyrosine kinase [Source:MGI Symbol;Acc:MGI:1918677]
#INFO:	BIOGRID_NOIEA NEIGHBOUR:	OGT	O-linked N-acetylglucosamine (GlcNAc) transferase (UDP-N-acetylglucosamine:polypeptide-N-acetylglucosaminyl transferase) [Source:MGI Symbol;Acc:MGI:1339639]
#INFO:	BIOGRID_NOIEA NEIGHBOUR:	PKD2	polycystic kidney disease 2 [Source:MGI Symbol;Acc:MGI:1099818]
#INFO:	BIOGRID_NOIEA NEIGHBOUR:	NPHS2	nephrosis 2, podocin [Source:MGI Symbol;Acc:MGI:2157018]
#INFO:	BIOGRID_NOIEA NEIGHBOUR:	MRPL41	mitochondrial ribosomal protein L41 [Source:MGI Symbol;Acc:MGI:1333816]
#INFO:	BIOGRID_NOIEA NEIGHBOUR:	ARHGAP32	Rho GTPase activating protein 32 [Source:MGI Symbol;Acc:MGI:2450166]
#INFO:	BIOGRID_NOIEA NEIGHBOUR:	SYK	spleen tyrosine kinase [Source:MGI Symbol;Acc:MGI:99515]
#INFO:	BIOGRID_NOIEA NEIGHBOUR:	SLX4	SLX4 structure-specific endonuclease subunit homolog (S. cerevisiae) [Source:MGI Symbol;Acc:MGI:106299]
#INFO:	BIOGRID_NOIEA NEIGHBOUR:	SOCS1	suppressor of cytokine signaling 1 [Source:MGI Symbol;Acc:MGI:1354910]
#INFO:	BIOGRID_NOIEA NEIGHBOUR:	SHARPIN	SHANK-associated RH domain interacting protein [Source:MGI Symbol;Acc:MGI:1913331]
#INFO:	BIOGRID_NOIEA NEIGHBOUR:	COTL1	coactosin-like 1 (Dictyostelium) [Source:MGI Symbol;Acc:MGI:1919292]
#INFO:	BIOGRID_NOIEA NEIGHBOUR:	RSC1A1	regulatory solute carrier protein, family 1, member 1 [Source:MGI Symbol;Acc:MGI:3526447]
#INFO:	BIOGRID_NOIEA NEIGHBOUR:	HNRNPH2	heterogeneous nuclear ribonucleoprotein H2 [Source:MGI Symbol;Acc:MGI:1201779]
#INFO:	BIOGRID_NOIEA NEIGHBOUR:	DLG4	discs, large homolog 4 (Drosophila) [Source:MGI Symbol;Acc:MGI:1277959]
#INFO:	BIOGRID_NOIEA NEIGHBOUR:	PLA2G4A	phospholipase A2, group IVA (cytosolic, calcium-dependent) [Source:MGI Symbol;Acc:MGI:1195256]
#INFO:	BIOGRID_NOIEA NEIGHBOUR:	ZUFSP	zinc finger with UFM1-specific peptidase domain [Source:MGI Symbol;Acc:MGI:1919830]
#INFO:	BIOGRID_NOIEA NEIGHBOUR:	PSMD11	proteasome (prosome, macropain) 26S subunit, non-ATPase, 11 [Source:MGI Symbol;Acc:MGI:1916327]
#INFO:	BIOGRID_NOIEA NEIGHBOUR:	FCGR2B	Fc receptor, IgG, low affinity IIb [Source:MGI Symbol;Acc:MGI:95499]
#INFO:	BIOGRID_NOIEA NEIGHBOUR:	AGO2	argonaute RISC catalytic subunit 2 [Source:MGI Symbol;Acc:MGI:2446632]
#INFO:	BIOGRID_NOIEA NEIGHBOUR:	PROM1	prominin 1 [Source:MGI Symbol;Acc:MGI:1100886]
#INFO:	BIOGRID_NOIEA NEIGHBOUR:	GTF2H3	general transcription factor IIH, polypeptide 3 [Source:MGI Symbol;Acc:MGI:1277143]
#INFO:	BIOGRID_NOIEA NEIGHBOUR:	STAT1	signal transducer and activator of transcription 1 [Source:MGI Symbol;Acc:MGI:103063]
#INFO:	BIOGRID_NOIEA NEIGHBOUR:	ATP6V1A	ATPase, H+ transporting, lysosomal V1 subunit A [Source:MGI Symbol;Acc:MGI:1201780]
#INFO:	BIOGRID_NOIEA NEIGHBOUR:	CSF2RB2	colony stimulating factor 2 receptor, beta 2, low-affinity (granulocyte-macrophage) [Source:MGI Symbol;Acc:MGI:1339760]
#INFO:	BIOGRID_NOIEA NEIGHBOUR:	RPL3	ribosomal protein L3 [Source:MGI Symbol;Acc:MGI:1351605]
#INFO:	BIOGRID_NOIEA NEIGHBOUR:	MAPT	microtubule-associated protein tau [Source:MGI Symbol;Acc:MGI:97180]
#INFO:	BIOGRID_NOIEA NEIGHBOUR:	NANOG	Nanog homeobox [Source:MGI Symbol;Acc:MGI:1919200]
#INFO:	BIOGRID_NOIEA NEIGHBOUR:	S1PR1	sphingosine-1-phosphate receptor 1 [Source:MGI Symbol;Acc:MGI:1096355]
#INFO:	BIOGRID_NOIEA NEIGHBOUR:	SCNN1G	sodium channel, nonvoltage-gated 1 gamma [Source:MGI Symbol;Acc:MGI:104695]
#INFO:	BIOGRID_NOIEA NEIGHBOUR:	EIF2S3Y	eukaryotic translation initiation factor 2, subunit 3, structural gene Y-linked [Source:MGI Symbol;Acc:MGI:1349430]
#INFO:	BIOGRID_NOIEA NEIGHBOUR:	PSMD4	proteasome (prosome, macropain) 26S subunit, non-ATPase, 4 [Source:MGI Symbol;Acc:MGI:1201670]
#INFO:	BIOGRID_NOIEA NEIGHBOUR:	UCHL1	ubiquitin carboxy-terminal hydrolase L1 [Source:MGI Symbol;Acc:MGI:103149]
#INFO:	BIOGRID_NOIEA NEIGHBOUR:	MT3	metallothionein 3 [Source:MGI Symbol;Acc:MGI:97173]
#INFO:	BIOGRID_NOIEA NEIGHBOUR:	MRPS9	mitochondrial ribosomal protein S9 [Source:MGI Symbol;Acc:MGI:1916777]
#INFO:	BIOGRID_NOIEA NEIGHBOUR:	GRIN1	glutamate receptor, ionotropic, NMDA1 (zeta 1) [Source:MGI Symbol;Acc:MGI:95819]
#INFO:	BIOGRID_NOIEA NEIGHBOUR:	IKBKE	inhibitor of kappaB kinase epsilon [Source:MGI Symbol;Acc:MGI:1929612]
#INFO:	BIOGRID_NOIEA NEIGHBOUR:	YBX2	Y box protein 2 [Source:MGI Symbol;Acc:MGI:1096372]
#INFO:	BIOGRID_NOIEA NEIGHBOUR:	FCHO2	FCH domain only 2 [Source:MGI Symbol;Acc:MGI:3505790]
#INFO:	BIOGRID_NOIEA NEIGHBOUR:	UBFD1	ubiquitin family domain containing 1 [Source:MGI Symbol;Acc:MGI:107301]
#INFO:	BIOGRID_NOIEA NEIGHBOUR:	KIF15	kinesin family member 15 [Source:MGI Symbol;Acc:MGI:1098258]
#INFO:	BIOGRID_NOIEA NEIGHBOUR:	RPS25	ribosomal protein S25 [Source:MGI Symbol;Acc:MGI:1922867]
#INFO:	BIOGRID_NOIEA NEIGHBOUR:	CXCL2	chemokine (C-X-C motif) ligand 2 [Source:MGI Symbol;Acc:MGI:1340094]
#INFO:	BIOGRID_NOIEA NEIGHBOUR:	PATJ	PATJ, crumbs cell polarity complex component [Source:MGI Symbol;Acc:MGI:1277960]
#INFO:	BIOGRID_NOIEA NEIGHBOUR:	RNF111	ring finger 111 [Source:MGI Symbol;Acc:MGI:1934919]
#INFO:	BIOGRID_NOIEA NEIGHBOUR:	PSMD5	proteasome (prosome, macropain) 26S subunit, non-ATPase, 5 [Source:MGI Symbol;Acc:MGI:1914248]
#INFO:	BIOGRID_NOIEA NEIGHBOUR:	EPRS	glutamyl-prolyl-tRNA synthetase [Source:MGI Symbol;Acc:MGI:97838]
#INFO:	BIOGRID_NOIEA NEIGHBOUR:	RPS18	ribosomal protein S18 [Source:MGI Symbol;Acc:MGI:98146]
#INFO:	BIOGRID_NOIEA NEIGHBOUR:	FAF2	Fas associated factor family member 2 [Source:MGI Symbol;Acc:MGI:1923827]
#INFO:	BIOGRID_NOIEA NEIGHBOUR:	TAB1	TGF-beta activated kinase 1/MAP3K7 binding protein 1 [Source:MGI Symbol;Acc:MGI:1913763]
#INFO:	BIOGRID_NOIEA NEIGHBOUR:	CYCS	cytochrome c, somatic [Source:MGI Symbol;Acc:MGI:88578]
#INFO:	BIOGRID_NOIEA NEIGHBOUR:	ATXN3	ataxin 3 [Source:MGI Symbol;Acc:MGI:1099442]
#INFO:	BIOGRID_NOIEA NEIGHBOUR:	TIMM13	translocase of inner mitochondrial membrane 13 [Source:MGI Symbol;Acc:MGI:1353432]
#INFO:	BIOGRID_NOIEA NEIGHBOUR:	CCNE1	cyclin E1 [Source:MGI Symbol;Acc:MGI:88316]
#INFO:	BIOGRID_NOIEA NEIGHBOUR:	ING3	inhibitor of growth family, member 3 [Source:MGI Symbol;Acc:MGI:1919027]
#INFO:	BIOGRID_NOIEA NEIGHBOUR:	MC4R	melanocortin 4 receptor [Source:MGI Symbol;Acc:MGI:99457]
#INFO:	BIOGRID_NOIEA NEIGHBOUR:	BTBD1	BTB (POZ) domain containing 1 [Source:MGI Symbol;Acc:MGI:1933765]
#INFO:	BIOGRID_NOIEA NEIGHBOUR:	RPL21	ribosomal protein L21 [Source:MGI Symbol;Acc:MGI:1278340]
#INFO:	BIOGRID_NOIEA NEIGHBOUR:	FBXO32	F-box protein 32 [Source:MGI Symbol;Acc:MGI:1914981]
#INFO:	BIOGRID_NOIEA NEIGHBOUR:	CEBPB	CCAAT/enhancer binding protein (C/EBP), beta [Source:MGI Symbol;Acc:MGI:88373]
#INFO:	BIOGRID_NOIEA NEIGHBOUR:	UBA6	ubiquitin-like modifier activating enzyme 6 [Source:MGI Symbol;Acc:MGI:1913894]
#INFO:	BIOGRID_NOIEA NEIGHBOUR:	MRPL28	mitochondrial ribosomal protein L28 [Source:MGI Symbol;Acc:MGI:1915861]
#INFO:	BIOGRID_NOIEA NEIGHBOUR:	GM21818	predicted gene, 21818 [Source:MGI Symbol;Acc:MGI:5433982]
#INFO:	BIOGRID_NOIEA NEIGHBOUR:	SLMAP	sarcolemma associated protein [Source:MGI Symbol;Acc:MGI:1933549]
#INFO:	BIOGRID_NOIEA NEIGHBOUR:	CFLAR	CASP8 and FADD-like apoptosis regulator [Source:MGI Symbol;Acc:MGI:1336166]
#INFO:	BIOGRID_NOIEA NEIGHBOUR:	RPLP1	ribosomal protein, large, P1 [Source:MGI Symbol;Acc:MGI:1927099]
#INFO:	BIOGRID_NOIEA NEIGHBOUR:	FARSA	phenylalanyl-tRNA synthetase, alpha subunit [Source:MGI Symbol;Acc:MGI:1913840]
#INFO:	BIOGRID_NOIEA NEIGHBOUR:	SIRT1	sirtuin 1 [Source:MGI Symbol;Acc:MGI:2135607]
#INFO:	BIOGRID_NOIEA NEIGHBOUR:	OTUB1	OTU domain, ubiquitin aldehyde binding 1 [Source:MGI Symbol;Acc:MGI:2147616]
#INFO:	BIOGRID_NOIEA NEIGHBOUR:	VPS37A	vacuolar protein sorting 37A [Source:MGI Symbol;Acc:MGI:1261835]
#INFO:	BIOGRID_NOIEA NEIGHBOUR:	PSMC2	proteasome (prosome, macropain) 26S subunit, ATPase 2 [Source:MGI Symbol;Acc:MGI:109555]
#INFO:	BIOGRID_NOIEA NEIGHBOUR:	MRPS21	mitochondrial ribosomal protein S21 [Source:MGI Symbol;Acc:MGI:1913542]
#INFO:	BIOGRID_NOIEA NEIGHBOUR:	PROP1	paired like homeodomain factor 1 [Source:MGI Symbol;Acc:MGI:109330]
#INFO:	BIOGRID_NOIEA NEIGHBOUR:	RPL10	ribosomal protein L10 [Source:MGI Symbol;Acc:MGI:105943]
#INFO:	BIOGRID_NOIEA NEIGHBOUR:	BAG6	BCL2-associated athanogene 6 [Source:MGI Symbol;Acc:MGI:1919439]
#INFO:	BIOGRID_NOIEA NEIGHBOUR:	EIF3L	eukaryotic translation initiation factor 3, subunit L [Source:MGI Symbol;Acc:MGI:2386251]
#INFO:	BIOGRID_NOIEA NEIGHBOUR:	UBE3C	ubiquitin protein ligase E3C [Source:MGI Symbol;Acc:MGI:2140998]
#INFO:	BIOGRID_NOIEA NEIGHBOUR:	KEAP1	kelch-like ECH-associated protein 1 [Source:MGI Symbol;Acc:MGI:1858732]
#INFO:	BIOGRID_NOIEA NEIGHBOUR:	RNF213	ring finger protein 213 [Source:MGI Symbol;Acc:MGI:1289196]
#INFO:	BIOGRID_NOIEA NEIGHBOUR:	RPS3A1	ribosomal protein S3A1 [Source:MGI Symbol;Acc:MGI:1202063]
#INFO:	BIOGRID_NOIEA NEIGHBOUR:	RPS8	ribosomal protein S8 [Source:MGI Symbol;Acc:MGI:98166]
#INFO:	BIOGRID_NOIEA NEIGHBOUR:	TNIP1	TNFAIP3 interacting protein 1 [Source:MGI Symbol;Acc:MGI:1926194]
#INFO:	BIOGRID_NOIEA NEIGHBOUR:	RPL10A	ribosomal protein L10A [Source:MGI Symbol;Acc:MGI:1343877]
#INFO:	BIOGRID_NOIEA NEIGHBOUR:	PLRG1	pleiotropic regulator 1 [Source:MGI Symbol;Acc:MGI:1858197]
#INFO:	BIOGRID_NOIEA NEIGHBOUR:	PTCD3	pentatricopeptide repeat domain 3 [Source:MGI Symbol;Acc:MGI:1917206]
#INFO:	BIOGRID_NOIEA NEIGHBOUR:	USP14	ubiquitin specific peptidase 14 [Source:MGI Symbol;Acc:MGI:1928898]
#INFO:	BIOGRID_NOIEA NEIGHBOUR:	SKIL	SKI-like [Source:MGI Symbol;Acc:MGI:106203]
#INFO:	BIOGRID_NOIEA NEIGHBOUR:	BRCC3	BRCA1/BRCA2-containing complex, subunit 3 [Source:MGI Symbol;Acc:MGI:2389572]
#INFO:	BIOGRID_NOIEA NEIGHBOUR:	EIF4EBP1	eukaryotic translation initiation factor 4E binding protein 1 [Source:MGI Symbol;Acc:MGI:103267]
#INFO:	BIOGRID_NOIEA NEIGHBOUR:	LUC7L	Luc7-like [Source:MGI Symbol;Acc:MGI:1914228]
#INFO:	BIOGRID_NOIEA NEIGHBOUR:	CHCHD6	coiled-coil-helix-coiled-coil-helix domain containing 6 [Source:MGI Symbol;Acc:MGI:1913348]
#INFO:	BIOGRID_NOIEA NEIGHBOUR:	HERC2	HECT and RLD domain containing E3 ubiquitin protein ligase 2 [Source:MGI Symbol;Acc:MGI:103234]
#INFO:	BIOGRID_NOIEA NEIGHBOUR:	YBX1	Y box protein 1 [Source:MGI Symbol;Acc:MGI:99146]
#INFO:	BIOGRID_NOIEA NEIGHBOUR:	ANKRD13A	ankyrin repeat domain 13a [Source:MGI Symbol;Acc:MGI:1915670]
#INFO:	BIOGRID_NOIEA NEIGHBOUR:	MAFA	v-maf musculoaponeurotic fibrosarcoma oncogene family, protein A (avian) [Source:MGI Symbol;Acc:MGI:2673307]
#INFO:	BIOGRID_NOIEA NEIGHBOUR:	RNF216	ring finger protein 216 [Source:MGI Symbol;Acc:MGI:1344349]
#INFO:	BIOGRID_NOIEA NEIGHBOUR:	NARS	asparaginyl-tRNA synthetase [Source:MGI Symbol;Acc:MGI:1917473]
#INFO:	BIOGRID_NOIEA NEIGHBOUR:	TOPORS	topoisomerase I binding, arginine/serine-rich [Source:MGI Symbol;Acc:MGI:2146189]
#INFO:	BIOGRID_NOIEA NEIGHBOUR:	XIAP	X-linked inhibitor of apoptosis [Source:MGI Symbol;Acc:MGI:107572]
#INFO:	BIOGRID_NOIEA NEIGHBOUR:	MRPL12	mitochondrial ribosomal protein L12 [Source:MGI Symbol;Acc:MGI:1926273]
#INFO:	BIOGRID_NOIEA NEIGHBOUR:	SMAD3	SMAD family member 3 [Source:MGI Symbol;Acc:MGI:1201674]
#INFO:	BIOGRID_NOIEA NEIGHBOUR:	UBE2N	ubiquitin-conjugating enzyme E2N [Source:MGI Symbol;Acc:MGI:1934835]
#INFO:	BIOGRID_NOIEA NEIGHBOUR:	CDH1	cadherin 1 [Source:MGI Symbol;Acc:MGI:88354]
#INFO:	BIOGRID_NOIEA NEIGHBOUR:	MAD2L1	MAD2 mitotic arrest deficient-like 1 [Source:MGI Symbol;Acc:MGI:1860374]
#INFO:	BIOGRID_NOIEA NEIGHBOUR:	UBR4	ubiquitin protein ligase E3 component n-recognin 4 [Source:MGI Symbol;Acc:MGI:1916366]
#INFO:	BIOGRID_NOIEA NEIGHBOUR:	TMF1	TATA element modulatory factor 1 [Source:MGI Symbol;Acc:MGI:2684999]
#INFO:	BIOGRID_NOIEA NEIGHBOUR:	USP4	ubiquitin specific peptidase 4 (proto-oncogene) [Source:MGI Symbol;Acc:MGI:98905]
#INFO:	BIOGRID_NOIEA NEIGHBOUR:	AP2A2	adaptor-related protein complex 2, alpha 2 subunit [Source:MGI Symbol;Acc:MGI:101920]
#INFO:	BIOGRID_NOIEA NEIGHBOUR:	VIM	vimentin [Source:MGI Symbol;Acc:MGI:98932]
#INFO:	BIOGRID_NOIEA NEIGHBOUR:	MAP3K7	mitogen-activated protein kinase kinase kinase 7 [Source:MGI Symbol;Acc:MGI:1346877]
#INFO:	BIOGRID_NOIEA NEIGHBOUR:	PARK2	Parkinson disease (autosomal recessive, juvenile) 2, parkin [Source:MGI Symbol;Acc:MGI:1355296]
#INFO:	BIOGRID_NOIEA NEIGHBOUR:	PKNOX1	Pbx/knotted 1 homeobox [Source:MGI Symbol;Acc:MGI:1201409]
#INFO:	BIOGRID_NOIEA NEIGHBOUR:	CHUK	conserved helix-loop-helix ubiquitous kinase [Source:MGI Symbol;Acc:MGI:99484]
#INFO:	BIOGRID_NOIEA NEIGHBOUR:	AMFR	autocrine motility factor receptor [Source:MGI Symbol;Acc:MGI:1345634]
#INFO:	BIOGRID_NOIEA NEIGHBOUR:	TUBB5	tubulin, beta 5 class I [Source:MGI Symbol;Acc:MGI:107812]
#INFO:	BIOGRID_NOIEA NEIGHBOUR:	AIMP1	aminoacyl tRNA synthetase complex-interacting multifunctional protein 1 [Source:MGI Symbol;Acc:MGI:102774]
#INFO:	BIOGRID_NOIEA NEIGHBOUR:	ZFYVE9	zinc finger, FYVE domain containing 9 [Source:MGI Symbol;Acc:MGI:2652838]
#INFO:	BIOGRID_NOIEA NEIGHBOUR:	GTF2H1	general transcription factor II H, polypeptide 1 [Source:MGI Symbol;Acc:MGI:1277216]
#INFO:	BIOGRID_NOIEA NEIGHBOUR:	IQCB1	IQ calmodulin-binding motif containing 1 [Source:MGI Symbol;Acc:MGI:2443764]
#INFO:	BIOGRID_NOIEA NEIGHBOUR:	SERPINE2	serine (or cysteine) peptidase inhibitor, clade E, member 2 [Source:MGI Symbol;Acc:MGI:101780]
#INFO:	BIOGRID_NOIEA NEIGHBOUR:	SRP72	signal recognition particle 72 [Source:MGI Symbol;Acc:MGI:1333795]
#INFO:	BIOGRID_NOIEA NEIGHBOUR:	KHNYN	KH and NYN domain containing [Source:MGI Symbol;Acc:MGI:2451333]
#INFO:	BIOGRID_NOIEA NEIGHBOUR:	AHNAK	AHNAK nucleoprotein (desmoyokin) [Source:MGI Symbol;Acc:MGI:1316648]
#INFO:	BIOGRID_NOIEA NEIGHBOUR:	SAMM50	SAMM50 sorting and assembly machinery component [Source:MGI Symbol;Acc:MGI:1915903]
#INFO:	BIOGRID_NOIEA NEIGHBOUR:	NR5A1	nuclear receptor subfamily 5, group A, member 1 [Source:MGI Symbol;Acc:MGI:1346833]
#INFO:	BIOGRID_NOIEA NEIGHBOUR:	TUBA1A	tubulin, alpha 1A [Source:MGI Symbol;Acc:MGI:98869]
#INFO:	BIOGRID_NOIEA NEIGHBOUR:	RAD23A	RAD23 homolog A, nucleotide excision repair protein [Source:MGI Symbol;Acc:MGI:105126]
#INFO:	BIOGRID_NOIEA NEIGHBOUR:	PEG3	paternally expressed 3 [Source:MGI Symbol;Acc:MGI:104748]
#INFO:	BIOGRID_NOIEA NEIGHBOUR:	UBXN2A	UBX domain protein 2A [Source:MGI Symbol;Acc:MGI:2442310]
#INFO:	BIOGRID_NOIEA NEIGHBOUR:	USF1	upstream transcription factor 1 [Source:MGI Symbol;Acc:MGI:99542]
#INFO:	BIOGRID_NOIEA NEIGHBOUR:	RNF126	ring finger protein 126 [Source:MGI Symbol;Acc:MGI:1917544]
#INFO:	BIOGRID_NOIEA NEIGHBOUR:	USP38	ubiquitin specific peptidase 38 [Source:MGI Symbol;Acc:MGI:1922091]
#INFO:	BIOGRID_NOIEA NEIGHBOUR:	HAP1	huntingtin-associated protein 1 [Source:MGI Symbol;Acc:MGI:1261831]
#INFO:	BIOGRID_NOIEA NEIGHBOUR:	RFC1	replication factor C (activator 1) 1 [Source:MGI Symbol;Acc:MGI:97891]
#INFO:	BIOGRID_NOIEA NEIGHBOUR:	BCR	breakpoint cluster region [Source:MGI Symbol;Acc:MGI:88141]
#INFO:	BIOGRID_NOIEA NEIGHBOUR:	USP13	ubiquitin specific peptidase 13 (isopeptidase T-3) [Source:MGI Symbol;Acc:MGI:1919857]
#INFO:	BIOGRID_NOIEA NEIGHBOUR:	ERCC5	excision repair cross-complementing rodent repair deficiency, complementation group 5 [Source:MGI Symbol;Acc:MGI:103582]
#INFO:	BIOGRID_NOIEA NEIGHBOUR:	LYN	LYN proto-oncogene, Src family tyrosine kinase [Source:MGI Symbol;Acc:MGI:96892]
#INFO:	BIOGRID_NOIEA NEIGHBOUR:	JUNB	jun B proto-oncogene [Source:MGI Symbol;Acc:MGI:96647]
#INFO:	BIOGRID_NOIEA NEIGHBOUR:	SRSF6	serine/arginine-rich splicing factor 6 [Source:MGI Symbol;Acc:MGI:1915246]
#INFO:	BIOGRID_NOIEA NEIGHBOUR:	TIMELESS	timeless circadian clock 1 [Source:MGI Symbol;Acc:MGI:1321393]
#INFO:	BIOGRID_NOIEA NEIGHBOUR:	FYN	Fyn proto-oncogene [Source:MGI Symbol;Acc:MGI:95602]
#INFO:	BIOGRID_NOIEA NEIGHBOUR:	RPL36A	ribosomal protein L36A-like [Source:MGI Symbol;Acc:MGI:1913733]
#INFO:	BIOGRID_NOIEA NEIGHBOUR:	SPRTN	SprT-like N-terminal domain [Source:MGI Symbol;Acc:MGI:2685351]
#INFO:	BIOGRID_NOIEA NEIGHBOUR:	RPL14	ribosomal protein L14 [Source:MGI Symbol;Acc:MGI:1914365]
#INFO:	BIOGRID_NOIEA NEIGHBOUR:	ITSN2	intersectin 2 [Source:MGI Symbol;Acc:MGI:1338049]
#INFO:	BIOGRID_NOIEA NEIGHBOUR:	GSK3B	glycogen synthase kinase 3 beta [Source:MGI Symbol;Acc:MGI:1861437]
#INFO:	BIOGRID_NOIEA NEIGHBOUR:	RPLP0	ribosomal protein, large, P0 [Source:MGI Symbol;Acc:MGI:1927636]
#INFO:	BIOGRID_NOIEA NEIGHBOUR:	DAP3	death associated protein 3 [Source:MGI Symbol;Acc:MGI:1929538]
#INFO:	BIOGRID_NOIEA NEIGHBOUR:	PSMC3	proteasome (prosome, macropain) 26S subunit, ATPase 3 [Source:MGI Symbol;Acc:MGI:1098754]
#INFO:	BIOGRID_NOIEA NEIGHBOUR:	ZFAND6	zinc finger, AN1-type domain 6 [Source:MGI Symbol;Acc:MGI:1929510]
#INFO:	BIOGRID_NOIEA NEIGHBOUR:	HERC4	hect domain and RLD 4 [Source:MGI Symbol;Acc:MGI:1914595]
#INFO:	BIOGRID_NOIEA NEIGHBOUR:	RRM1	ribonucleotide reductase M1 [Source:MGI Symbol;Acc:MGI:98180]
#INFO:	BIOGRID_NOIEA NEIGHBOUR:	HNF1B	HNF1 homeobox B [Source:MGI Symbol;Acc:MGI:98505]
#INFO:	BIOGRID_NOIEA NEIGHBOUR:	TRIP12	thyroid hormone receptor interactor 12 [Source:MGI Symbol;Acc:MGI:1309481]
#INFO:	BIOGRID_NOIEA NEIGHBOUR:	HGS	HGF-regulated tyrosine kinase substrate [Source:MGI Symbol;Acc:MGI:104681]
#INFO:	BIOGRID_NOIEA NEIGHBOUR:	UBAC2	ubiquitin associated domain containing 2 [Source:MGI Symbol;Acc:MGI:1916139]
#INFO:	BIOGRID_NOIEA NEIGHBOUR:	CTTN	cortactin [Source:MGI Symbol;Acc:MGI:99695]
#INFO:	BIOGRID_NOIEA NEIGHBOUR:	EPN1	epsin 1 [Source:MGI Symbol;Acc:MGI:1333763]
#INFO:	BIOGRID_NOIEA NEIGHBOUR:	USP37	ubiquitin specific peptidase 37 [Source:MGI Symbol;Acc:MGI:2442483]
#INFO:	BIOGRID_NOIEA NEIGHBOUR:	GABARAPL2	gamma-aminobutyric acid (GABA) A receptor-associated protein-like 2 [Source:MGI Symbol;Acc:MGI:1890602]
#INFO:	BIOGRID_NOIEA NEIGHBOUR:	NTRK2	neurotrophic tyrosine kinase, receptor, type 2 [Source:MGI Symbol;Acc:MGI:97384]
#INFO:	BIOGRID_NOIEA NEIGHBOUR:	IRF5	interferon regulatory factor 5 [Source:MGI Symbol;Acc:MGI:1350924]
#INFO:	BIOGRID_NOIEA NEIGHBOUR:	SQSTM1	sequestosome 1 [Source:MGI Symbol;Acc:MGI:107931]
#INFO:	BIOGRID_NOIEA NEIGHBOUR:	LAMA1	laminin, alpha 1 [Source:MGI Symbol;Acc:MGI:99892]
#INFO:	BIOGRID_NOIEA NEIGHBOUR:	2210011C24RIK	RIKEN cDNA 2210011C24 gene [Source:MGI Symbol;Acc:MGI:1917384]
#INFO:	BIOGRID_NOIEA NEIGHBOUR:	RNH1	ribonuclease/angiogenin inhibitor 1 [Source:MGI Symbol;Acc:MGI:1195456]
#INFO:	BIOGRID_NOIEA NEIGHBOUR:	PKD1	polycystic kidney disease 1 homolog [Source:MGI Symbol;Acc:MGI:97603]
#INFO:	BIOGRID_NOIEA NEIGHBOUR:	SNX27	sorting nexin family member 27 [Source:MGI Symbol;Acc:MGI:1923992]
#INFO:	BIOGRID_NOIEA NEIGHBOUR:	ARHGEF15	Rho guanine nucleotide exchange factor (GEF) 15 [Source:MGI Symbol;Acc:MGI:3045246]
#INFO:	BIOGRID_NOIEA NEIGHBOUR:	SMAD1	SMAD family member 1 [Source:MGI Symbol;Acc:MGI:109452]
#INFO:	BIOGRID_NOIEA NEIGHBOUR:	ANKRD37	ankyrin repeat domain 37 [Source:MGI Symbol;Acc:MGI:3603344]
#INFO:	BIOGRID_NOIEA NEIGHBOUR:	OTULIN	OTU deubiquitinase with linear linkage specificity [Source:MGI Symbol;Acc:MGI:3577015]
#INFO:	BIOGRID_NOIEA NEIGHBOUR:	CRLS1	cardiolipin synthase 1 [Source:MGI Symbol;Acc:MGI:1913836]
#INFO:	BIOGRID_NOIEA NEIGHBOUR:	PSMB4	proteasome (prosome, macropain) subunit, beta type 4 [Source:MGI Symbol;Acc:MGI:1098257]
#INFO:	BIOGRID_NOIEA NEIGHBOUR:	ZFAND5	zinc finger, AN1-type domain 5 [Source:MGI Symbol;Acc:MGI:1278334]
#INFO:	BIOGRID_NOIEA NEIGHBOUR:	PSEN1	presenilin 1 [Source:MGI Symbol;Acc:MGI:1202717]
#INFO:	BIOGRID_NOIEA NEIGHBOUR:	MYO9B	myosin IXb [Source:MGI Symbol;Acc:MGI:106624]
#INFO:	BIOGRID_NOIEA NEIGHBOUR:	STON2	stonin 2 [Source:MGI Symbol;Acc:MGI:1918272]
#INFO:	BIOGRID_NOIEA NEIGHBOUR:	PER3	period circadian clock 3 [Source:MGI Symbol;Acc:MGI:1277134]
#INFO:	BIOGRID_NOIEA NEIGHBOUR:	RPS9	ribosomal protein S9 [Source:MGI Symbol;Acc:MGI:1924096]
#INFO:	BIOGRID_NOIEA NEIGHBOUR:	MYCBP	MYC binding protein [Source:MGI Symbol;Acc:MGI:1891750]
#INFO:	BIOGRID_NOIEA NEIGHBOUR:	CTNNBIP1	catenin beta interacting protein 1 [Source:MGI Symbol;Acc:MGI:1915756]
#INFO:	BIOGRID_NOIEA NEIGHBOUR:	SSB	Sjogren syndrome antigen B [Source:MGI Symbol;Acc:MGI:98423]
#INFO:	BIOGRID_NOIEA NEIGHBOUR:	ABRAXAS1	BRCA1 A complex subunit [Source:MGI Symbol;Acc:MGI:1917931]
#INFO:	BIOGRID_NOIEA NEIGHBOUR:	UNK	unkempt family zinc finger [Source:MGI Symbol;Acc:MGI:2442456]
#INFO:	BIOGRID_NOIEA NEIGHBOUR:	MRPL22	mitochondrial ribosomal protein L22 [Source:MGI Symbol;Acc:MGI:1333794]
#INFO:	BIOGRID_NOIEA NEIGHBOUR:	TEX19.1	testis expressed gene 19.1 [Source:MGI Symbol;Acc:MGI:1920929]
#INFO:	BIOGRID_NOIEA NEIGHBOUR:	USP15	ubiquitin specific peptidase 15 [Source:MGI Symbol;Acc:MGI:101857]
#INFO:	BIOGRID_NOIEA NEIGHBOUR:	KIFAP3	kinesin-associated protein 3 [Source:MGI Symbol;Acc:MGI:107566]
#INFO:	BIOGRID_NOIEA NEIGHBOUR:	LCK	lymphocyte protein tyrosine kinase [Source:MGI Symbol;Acc:MGI:96756]
#INFO:	BIOGRID_NOIEA NEIGHBOUR:	TDP2	tyrosyl-DNA phosphodiesterase 2 [Source:MGI Symbol;Acc:MGI:1860486]
#INFO:	BIOGRID_NOIEA NEIGHBOUR:	FMR1	fragile X mental retardation syndrome 1 [Source:MGI Symbol;Acc:MGI:95564]
#INFO:	BIOGRID_NOIEA NEIGHBOUR:	USP32	ubiquitin specific peptidase 32 [Source:MGI Symbol;Acc:MGI:2144475]
#INFO:	BIOGRID_NOIEA NEIGHBOUR:	EEF1G	eukaryotic translation elongation factor 1 gamma [Source:MGI Symbol;Acc:MGI:1914410]
#INFO:	BIOGRID_NOIEA NEIGHBOUR:	AP2B1	adaptor-related protein complex 2, beta 1 subunit [Source:MGI Symbol;Acc:MGI:1919020]
#INFO:	BIOGRID_NOIEA NEIGHBOUR:	NDE1	nudE neurodevelopment protein 1 [Source:MGI Symbol;Acc:MGI:1914453]
#INFO:	BIOGRID_NOIEA NEIGHBOUR:	BIRC3	baculoviral IAP repeat-containing 3 [Source:MGI Symbol;Acc:MGI:1197007]
#INFO:	BIOGRID_NOIEA NEIGHBOUR:	CAMK1	calcium/calmodulin-dependent protein kinase I [Source:MGI Symbol;Acc:MGI:1098535]
#INFO:	BIOGRID_NOIEA NEIGHBOUR:	FOXP3	forkhead box P3 [Source:MGI Symbol;Acc:MGI:1891436]
#INFO:	BIOGRID_NOIEA NEIGHBOUR:	TBC1D15	TBC1 domain family, member 15 [Source:MGI Symbol;Acc:MGI:1913937]
#INFO:	BIOGRID_NOIEA NEIGHBOUR:	TNK2	tyrosine kinase, non-receptor, 2 [Source:MGI Symbol;Acc:MGI:1858308]
#INFO:	BIOGRID_NOIEA NEIGHBOUR:	SNF8	SNF8, ESCRT-II complex subunit, homolog (S. cerevisiae) [Source:MGI Symbol;Acc:MGI:1343161]
#INFO:	BIOGRID_NOIEA NEIGHBOUR:	UCHL5	ubiquitin carboxyl-terminal esterase L5 [Source:MGI Symbol;Acc:MGI:1914848]
#INFO:	BIOGRID_NOIEA NEIGHBOUR:	RPL4	ribosomal protein L4 [Source:MGI Symbol;Acc:MGI:1915141]
#INFO:	BIOGRID_NOIEA NEIGHBOUR:	RPL35A	ribosomal protein L35A [Source:MGI Symbol;Acc:MGI:1928894]
#INFO:	BIOGRID_NOIEA NEIGHBOUR:	GJA1	gap junction protein, alpha 1 [Source:MGI Symbol;Acc:MGI:95713]
#INFO:	BIOGRID_NOIEA NEIGHBOUR:	USP25	ubiquitin specific peptidase 25 [Source:MGI Symbol;Acc:MGI:1353655]
#INFO:	BIOGRID_NOIEA NEIGHBOUR:	CYLD	CYLD lysine 63 deubiquitinase [Source:MGI Symbol;Acc:MGI:1921506]
#INFO:	BIOGRID_NOIEA NEIGHBOUR:	MYOG	myogenin [Source:MGI Symbol;Acc:MGI:97276]
#INFO:	BIOGRID_NOIEA NEIGHBOUR:	TCF3	transcription factor 3 [Source:MGI Symbol;Acc:MGI:98510]
#INFO:	BIOGRID_NOIEA NEIGHBOUR:	ZFP110	zinc finger protein 110 [Source:MGI Symbol;Acc:MGI:1890378]
#INFO:	BIOGRID_NOIEA NEIGHBOUR:	SPATA2	spermatogenesis associated 2 [Source:MGI Symbol;Acc:MGI:2146885]
#INFO:	BIOGRID_NOIEA NEIGHBOUR:	CBLB	Casitas B-lineage lymphoma b [Source:MGI Symbol;Acc:MGI:2146430]
#INFO:	BIOGRID_NOIEA NEIGHBOUR:	INPP5D	inositol polyphosphate-5-phosphatase D [Source:MGI Symbol;Acc:MGI:107357]
#INFO:	BIOGRID_NOIEA NEIGHBOUR:	LEF1	lymphoid enhancer binding factor 1 [Source:MGI Symbol;Acc:MGI:96770]
#INFO:	BIOGRID_NOIEA NEIGHBOUR:	HNRNPU	heterogeneous nuclear ribonucleoprotein U [Source:MGI Symbol;Acc:MGI:1858195]
#INFO:	BIOGRID_NOIEA NEIGHBOUR:	CTNND1	catenin (cadherin associated protein), delta 1 [Source:MGI Symbol;Acc:MGI:105100]
#INFO:	BIOGRID_NOIEA NEIGHBOUR:	UBXN6	UBX domain protein 6 [Source:MGI Symbol;Acc:MGI:1913780]
#INFO:	BIOGRID_NOIEA NEIGHBOUR:	PABPC1	poly(A) binding protein, cytoplasmic 1 [Source:MGI Symbol;Acc:MGI:1349722]
#INFO:	BIOGRID_NOIEA NEIGHBOUR:	PXN	paxillin [Source:MGI Symbol;Acc:MGI:108295]
#INFO:	BIOGRID_NOIEA NEIGHBOUR:	SGTA	small glutamine-rich tetratricopeptide repeat (TPR)-containing, alpha [Source:MGI Symbol;Acc:MGI:1098703]
#INFO:	BIOGRID_NOIEA NEIGHBOUR:	ELF5	E74-like factor 5 [Source:MGI Symbol;Acc:MGI:1335079]
#INFO:	BIOGRID_NOIEA NEIGHBOUR:	FBXO31	F-box protein 31 [Source:MGI Symbol;Acc:MGI:1354708]
#INFO:	BIOGRID_NOIEA NEIGHBOUR:	ADRM1	adhesion regulating molecule 1 [Source:MGI Symbol;Acc:MGI:1929289]
#INFO:	BIOGRID_NOIEA NEIGHBOUR:	RAPGEF1	Rap guanine nucleotide exchange factor (GEF) 1 [Source:MGI Symbol;Acc:MGI:104580]
#INFO:	BIOGRID_NOIEA NEIGHBOUR:	LSM14A	LSM14A mRNA processing body assembly factor [Source:MGI Symbol;Acc:MGI:1914320]
#INFO:	BIOGRID_NOIEA NEIGHBOUR:	NCKIPSD	NCK interacting protein with SH3 domain [Source:MGI Symbol;Acc:MGI:1931834]
#INFO:	BIOGRID_NOIEA NEIGHBOUR:	RPGRIP1L	Rpgrip1-like [Source:MGI Symbol;Acc:MGI:1920563]
#INFO:	BIOGRID_NOIEA NEIGHBOUR:	HIST2H2AA1	histone cluster 2, H2aa2 [Source:MGI Symbol;Acc:MGI:2448283]
#INFO:	BIOGRID_NOIEA NEIGHBOUR:	DNAJC21	DnaJ heat shock protein family (Hsp40) member C21 [Source:MGI Symbol;Acc:MGI:1925371]
#INFO:	BIOGRID_NOIEA NEIGHBOUR:	IL12RB2	interleukin 12 receptor, beta 2 [Source:MGI Symbol;Acc:MGI:1270861]
#INFO:	BIOGRID_NOIEA NEIGHBOUR:	HIP1	huntingtin interacting protein 1 [Source:MGI Symbol;Acc:MGI:1099804]
#INFO:	BIOGRID_NOIEA NEIGHBOUR:	MTDH	metadherin [Source:MGI Symbol;Acc:MGI:1914404]
#INFO:	BIOGRID_NOIEA NEIGHBOUR:	NKX2-5	NK2 homeobox 5 [Source:MGI Symbol;Acc:MGI:97350]
#INFO:	BIOGRID_NOIEA NEIGHBOUR:	POLR1A	polymerase (RNA) I polypeptide A [Source:MGI Symbol;Acc:MGI:1096397]
#INFO:	BIOGRID_NOIEA NEIGHBOUR:	TAB2	TGF-beta activated kinase 1/MAP3K7 binding protein 2 [Source:MGI Symbol;Acc:MGI:1915902]
#INFO:	BIOGRID_NOIEA NEIGHBOUR:	FLNA	filamin, alpha [Source:MGI Symbol;Acc:MGI:95556]
#INFO:	BIOGRID_NOIEA NEIGHBOUR:	AXIN2	axin 2 [Source:MGI Symbol;Acc:MGI:1270862]
#INFO:	BIOGRID_NOIEA NEIGHBOUR:	PSMA1	proteasome (prosome, macropain) subunit, alpha type 1 [Source:MGI Symbol;Acc:MGI:1347005]
#INFO:	BIOGRID_NOIEA NEIGHBOUR:	MYH3	myosin, heavy polypeptide 3, skeletal muscle, embryonic [Source:MGI Symbol;Acc:MGI:1339709]
#INFO:	BIOGRID_NOIEA NEIGHBOUR:	LMTK2	lemur tyrosine kinase 2 [Source:MGI Symbol;Acc:MGI:3036247]
#INFO:	BIOGRID_NOIEA NEIGHBOUR:	SOCS3	suppressor of cytokine signaling 3 [Source:MGI Symbol;Acc:MGI:1201791]
#INFO:	BIOGRID_NOIEA NEIGHBOUR:	EP400	E1A binding protein p400 [Source:MGI Symbol;Acc:MGI:1276124]
#INFO:	BIOGRID_NOIEA NEIGHBOUR:	UBE4B	ubiquitination factor E4B [Source:MGI Symbol;Acc:MGI:1927086]
#INFO:	BIOGRID_NOIEA NEIGHBOUR:	DUSP1	dual specificity phosphatase 1 [Source:MGI Symbol;Acc:MGI:105120]
#INFO:	BIOGRID_NOIEA NEIGHBOUR:	GLI3	GLI-Kruppel family member GLI3 [Source:MGI Symbol;Acc:MGI:95729]
#INFO:	BIOGRID_NOIEA NEIGHBOUR:	RPL27A	ribosomal protein L27A [Source:MGI Symbol;Acc:MGI:1347076]
#INFO:	BIOGRID_NOIEA NEIGHBOUR:	RPL32	ribosomal protein L32 [Source:MGI Symbol;Acc:MGI:98038]
#INFO:	BIOGRID_NOIEA NEIGHBOUR:	UQCRH	ubiquinol-cytochrome c reductase hinge protein [Source:MGI Symbol;Acc:MGI:1913826]
#INFO:	BIOGRID_NOIEA NEIGHBOUR:	MRGBP	MRG/MORF4L binding protein [Source:MGI Symbol;Acc:MGI:1920497]
#INFO:	BIOGRID_NOIEA NEIGHBOUR:	NGFR	nerve growth factor receptor (TNFR superfamily, member 16) [Source:MGI Symbol;Acc:MGI:97323]
#INFO:	BIOGRID_NOIEA NEIGHBOUR:	ANP32E	acidic (leucine-rich) nuclear phosphoprotein 32 family, member E [Source:MGI Symbol;Acc:MGI:1913721]
#INFO:	BIOGRID_NOIEA NEIGHBOUR:	HDAC2	histone deacetylase 2 [Source:MGI Symbol;Acc:MGI:1097691]
#INFO:	BIOGRID_NOIEA NEIGHBOUR:	MRPL47	mitochondrial ribosomal protein L47 [Source:MGI Symbol;Acc:MGI:1921850]
#INFO:	BIOGRID_NOIEA NEIGHBOUR:	TNFAIP3	tumor necrosis factor, alpha-induced protein 3 [Source:MGI Symbol;Acc:MGI:1196377]
#INFO:	BIOGRID_NOIEA NEIGHBOUR:	SRRM1	serine/arginine repetitive matrix 1 [Source:MGI Symbol;Acc:MGI:1858303]
#INFO:	BIOGRID_NOIEA NEIGHBOUR:	ETV6	ets variant 6 [Source:MGI Symbol;Acc:MGI:109336]
#INFO:	BIOGRID_NOIEA NEIGHBOUR:	KCNMA1	potassium large conductance calcium-activated channel, subfamily M, alpha member 1 [Source:MGI Symbol;Acc:MGI:99923]
#INFO:	BIOGRID_NOIEA NEIGHBOUR:	EZR	ezrin [Source:MGI Symbol;Acc:MGI:98931]
#INFO:	BIOGRID_NOIEA NEIGHBOUR:	RNF168	ring finger protein 168 [Source:MGI Symbol;Acc:MGI:1917488]
#INFO:	BIOGRID_NOIEA NEIGHBOUR:	USP7	ubiquitin specific peptidase 7 [Source:MGI Symbol;Acc:MGI:2182061]
#INFO:	BIOGRID_NOIEA NEIGHBOUR:	ABRAXAS2	BRISC complex subunit [Source:MGI Symbol;Acc:MGI:1926116]
#INFO:	BIOGRID_NOIEA NEIGHBOUR:	RPL7	ribosomal protein L7 [Source:MGI Symbol;Acc:MGI:98073]
#INFO:	BIOGRID_NOIEA NEIGHBOUR:	TIMM8A1	translocase of inner mitochondrial membrane 8A1 [Source:MGI Symbol;Acc:MGI:1353433]
#INFO:	BIOGRID_NOIEA NEIGHBOUR:	ATAD3A	ATPase family, AAA domain containing 3A [Source:MGI Symbol;Acc:MGI:1919214]
#INFO:	BIOGRID_NOIEA NEIGHBOUR:	TRAF4	TNF receptor associated factor 4 [Source:MGI Symbol;Acc:MGI:1202880]
#INFO:	BIOGRID_NOIEA NEIGHBOUR:	CTNNA1	catenin (cadherin associated protein), alpha 1 [Source:MGI Symbol;Acc:MGI:88274]
#INFO:	BIOGRID_NOIEA NEIGHBOUR:	TMEM160	transmembrane protein 160 [Source:MGI Symbol;Acc:MGI:1916344]
#INFO:	BIOGRID_NOIEA NEIGHBOUR:	DNM2	dynamin 2 [Source:MGI Symbol;Acc:MGI:109547]
#INFO:	BIOGRID_NOIEA NEIGHBOUR:	ASCC1	activating signal cointegrator 1 complex subunit 1 [Source:MGI Symbol;Acc:MGI:1916340]
#INFO:	BIOGRID_NOIEA NEIGHBOUR:	PLEC	plectin [Source:MGI Symbol;Acc:MGI:1277961]
#INFO:	BIOGRID_NOIEA NEIGHBOUR:	VEGFA	vascular endothelial growth factor A [Source:MGI Symbol;Acc:MGI:103178]
#INFO:	BIOGRID_NOIEA NEIGHBOUR:	COPS2	COP9 signalosome subunit 2 [Source:MGI Symbol;Acc:MGI:1330276]
#INFO:	BIOGRID_NOIEA NEIGHBOUR:	MME	membrane metallo endopeptidase [Source:MGI Symbol;Acc:MGI:97004]
#INFO:	BIOGRID_NOIEA NEIGHBOUR:	UFD1	ubiquitin recognition factor in ER-associated degradation 1 [Source:MGI Symbol;Acc:MGI:109353]
#INFO:	BIOGRID_NOIEA NEIGHBOUR:	DGKZ	diacylglycerol kinase zeta [Source:MGI Symbol;Acc:MGI:1278339]
#INFO:	BIOGRID_NOIEA NEIGHBOUR:	EED	embryonic ectoderm development [Source:MGI Symbol;Acc:MGI:95286]
#INFO:	BIOGRID_NOIEA NEIGHBOUR:	PCP2	Purkinje cell protein 2 (L7) [Source:MGI Symbol;Acc:MGI:97508]
#INFO:	BIOGRID_NOIEA NEIGHBOUR:	MDM4	transformed mouse 3T3 cell double minute 4 [Source:MGI Symbol;Acc:MGI:107934]
#INFO:	BIOGRID_NOIEA NEIGHBOUR:	SOCS5	suppressor of cytokine signaling 5 [Source:MGI Symbol;Acc:MGI:2385459]
#INFO:	BIOGRID_NOIEA NEIGHBOUR:	SET	SET nuclear oncogene [Source:MGI Symbol;Acc:MGI:1860267]
#INFO:	BIOGRID_NOIEA NEIGHBOUR:	DES	desmin [Source:MGI Symbol;Acc:MGI:94885]
#INFO:	BIOGRID_NOIEA NEIGHBOUR:	STK38	serine/threonine kinase 38 [Source:MGI Symbol;Acc:MGI:2442572]
#INFO:	BIOGRID_NOIEA NEIGHBOUR:	EP300	E1A binding protein p300 [Source:MGI Symbol;Acc:MGI:1276116]
#INFO:	BIOGRID_NOIEA NEIGHBOUR:	URGCP	upregulator of cell proliferation [Source:MGI Symbol;Acc:MGI:1919296]
#INFO:	BIOGRID_NOIEA NEIGHBOUR:	STAM	signal transducing adaptor molecule (SH3 domain and ITAM motif) 1 [Source:MGI Symbol;Acc:MGI:1329014]
#INFO:	BIOGRID_NOIEA NEIGHBOUR:	KRT8	keratin 8 [Source:MGI Symbol;Acc:MGI:96705]
#INFO:	BIOGRID_NOIEA NEIGHBOUR:	USP9X	ubiquitin specific peptidase 9, X chromosome [Source:MGI Symbol;Acc:MGI:894681]
#INFO:	BIOGRID_NOIEA NEIGHBOUR:	PRMT1	protein arginine N-methyltransferase 1 [Source:MGI Symbol;Acc:MGI:107846]
#INFO:	BIOGRID_NOIEA NEIGHBOUR:	RUVBL1	RuvB-like protein 1 [Source:MGI Symbol;Acc:MGI:1928760]
#INFO:	BIOGRID_NOIEA NEIGHBOUR:	NSFL1C	NSFL1 (p97) cofactor (p47) [Source:MGI Symbol;Acc:MGI:3042273]
#INFO:	BIOGRID_NOIEA NEIGHBOUR:	UBAC1	ubiquitin associated domain containing 1 [Source:MGI Symbol;Acc:MGI:1920995]
#INFO:	BIOGRID_NOIEA NEIGHBOUR:	HIST2H2BB	histone cluster 2, H2bb [Source:MGI Symbol;Acc:MGI:2448413]
#INFO:	BIOGRID_NOIEA NEIGHBOUR:	CLOCK	circadian locomotor output cycles kaput [Source:MGI Symbol;Acc:MGI:99698]
#INFO:	BIOGRID_NOIEA NEIGHBOUR:	RPL30	ribosomal protein L30 [Source:MGI Symbol;Acc:MGI:98037]
#INFO:	BIOGRID_NOIEA NEIGHBOUR:	AP3B1	adaptor-related protein complex 3, beta 1 subunit [Source:MGI Symbol;Acc:MGI:1333879]
#INFO:	BIOGRID_NOIEA NEIGHBOUR:	USP12	ubiquitin specific peptidase 12 [Source:MGI Symbol;Acc:MGI:1270128]
#INFO:	BIOGRID_NOIEA NEIGHBOUR:	DUT	deoxyuridine triphosphatase [Source:MGI Symbol;Acc:MGI:1346051]
#INFO:	BIOGRID_NOIEA NEIGHBOUR:	RAD18	RAD18 E3 ubiquitin protein ligase [Source:MGI Symbol;Acc:MGI:1890476]
#INFO:	BIOGRID_NOIEA NEIGHBOUR:	LNX1	ligand of numb-protein X 1 [Source:MGI Symbol;Acc:MGI:1278335]
#INFO:	BIOGRID_NOIEA NEIGHBOUR:	CDKN2A	cyclin-dependent kinase inhibitor 2A [Source:MGI Symbol;Acc:MGI:104738]
#INFO:	BIOGRID_NOIEA NEIGHBOUR:	COPS6	COP9 signalosome subunit 6 [Source:MGI Symbol;Acc:MGI:1349439]
#INFO:	BIOGRID_NOIEA NEIGHBOUR:	PCNT	pericentrin (kendrin) [Source:MGI Symbol;Acc:MGI:102722]
#INFO:	BIOGRID_NOIEA NEIGHBOUR:	SNCA	synuclein, alpha [Source:MGI Symbol;Acc:MGI:1277151]
#INFO:	BIOGRID_NOIEA NEIGHBOUR:	SND1	staphylococcal nuclease and tudor domain containing 1 [Source:MGI Symbol;Acc:MGI:1929266]
#INFO:	BIOGRID_NOIEA NEIGHBOUR:	ZFP281	zinc finger protein 281 [Source:MGI Symbol;Acc:MGI:3029290]
#INFO:	BIOGRID_NOIEA NEIGHBOUR:	GIPC1	GIPC PDZ domain containing family, member 1 [Source:MGI Symbol;Acc:MGI:1926252]
#INFO:	BIOGRID_NOIEA NEIGHBOUR:	HNRNPUL1	heterogeneous nuclear ribonucleoprotein U-like 1 [Source:MGI Symbol;Acc:MGI:2443517]
#INFO:	BIOGRID_NOIEA NEIGHBOUR:	PARP1	poly (ADP-ribose) polymerase family, member 1 [Source:MGI Symbol;Acc:MGI:1340806]
#INFO:	BIOGRID_NOIEA NEIGHBOUR:	TCSTV3	2-cell-stage, variable group, member 3 [Source:MGI Symbol;Acc:MGI:2675349]
#INFO:	BIOGRID_NOIEA NEIGHBOUR:	GNB1	guanine nucleotide binding protein (G protein), beta 1 [Source:MGI Symbol;Acc:MGI:95781]
#INFO:	BIOGRID_NOIEA NEIGHBOUR:	RPL13	ribosomal protein L13 [Source:MGI Symbol;Acc:MGI:105922]
#INFO:	BIOGRID_NOIEA NEIGHBOUR:	SIN3B	transcriptional regulator, SIN3B (yeast) [Source:MGI Symbol;Acc:MGI:107158]
#INFO:	BIOGRID_NOIEA NEIGHBOUR:	SPTAN1	spectrin alpha, non-erythrocytic 1 [Source:MGI Symbol;Acc:MGI:98386]
#INFO:	BIOGRID_NOIEA NEIGHBOUR:	EPN2	epsin 2 [Source:MGI Symbol;Acc:MGI:1333766]
#INFO:	BIOGRID_NOIEA NEIGHBOUR:	ISG15	ISG15 ubiquitin-like modifier [Source:MGI Symbol;Acc:MGI:1855694]
#INFO:	BIOGRID_NOIEA NEIGHBOUR:	PAX6	paired box 6 [Source:MGI Symbol;Acc:MGI:97490]
#INFO:	BIOGRID_NOIEA NEIGHBOUR:	PCMTD2	protein-L-isoaspartate (D-aspartate) O-methyltransferase domain containing 2 [Source:MGI Symbol;Acc:MGI:1923927]
#INFO:	BIOGRID_NOIEA NEIGHBOUR:	PSMD2	proteasome (prosome, macropain) 26S subunit, non-ATPase, 2 [Source:MGI Symbol;Acc:MGI:1096584]
#INFO:	BIOGRID_NOIEA NEIGHBOUR:	ASCC3	activating signal cointegrator 1 complex subunit 3 [Source:MGI Symbol;Acc:MGI:1925237]
#INFO:	BIOGRID_NOIEA NEIGHBOUR:	MITF	microphthalmia-associated transcription factor [Source:MGI Symbol;Acc:MGI:104554]
#INFO:	BIOGRID_NOIEA NEIGHBOUR:	RPL12	ribosomal protein L12 [Source:MGI Symbol;Acc:MGI:98002]
#INFO:	BIOGRID_NOIEA NEIGHBOUR:	RPL23	ribosomal protein L23 [Source:MGI Symbol;Acc:MGI:1929455]
#INFO:	BIOGRID_NOIEA NEIGHBOUR:	EIF2S2	eukaryotic translation initiation factor 2, subunit 2 (beta) [Source:MGI Symbol;Acc:MGI:1914454]
#INFO:	BIOGRID_NOIEA NEIGHBOUR:	PATZ1	POZ (BTB) and AT hook containing zinc finger 1 [Source:MGI Symbol;Acc:MGI:1891832]
#INFO:	BIOGRID_NOIEA NEIGHBOUR:	BHMT	betaine-homocysteine methyltransferase [Source:MGI Symbol;Acc:MGI:1339972]
#INFO:	BIOGRID_NOIEA NEIGHBOUR:	PER1	period circadian clock 1 [Source:MGI Symbol;Acc:MGI:1098283]
#INFO:	BIOGRID_NOIEA NEIGHBOUR:	HSP90AB1	heat shock protein 90 alpha (cytosolic), class B member 1 [Source:MGI Symbol;Acc:MGI:96247]
#INFO:	BIOGRID_NOIEA NEIGHBOUR:	STRN4	striatin, calmodulin binding protein 4 [Source:MGI Symbol;Acc:MGI:2142346]
#INFO:	BIOGRID_NOIEA NEIGHBOUR:	SRP9	signal recognition particle 9 [Source:MGI Symbol;Acc:MGI:1350930]
#INFO:	BIOGRID_NOIEA NEIGHBOUR:	APEH	acylpeptide hydrolase [Source:MGI Symbol;Acc:MGI:88041]
#INFO:	BIOGRID_NOIEA NEIGHBOUR:	NCL	nucleolin [Source:MGI Symbol;Acc:MGI:97286]
#INFO:	BIOGRID_NOIEA NEIGHBOUR:	TRAF2	TNF receptor-associated factor 2 [Source:MGI Symbol;Acc:MGI:101835]
#INFO:	BIOGRID_NOIEA NEIGHBOUR:	TRIM25	tripartite motif-containing 25 [Source:MGI Symbol;Acc:MGI:102749]
#INFO:	BIOGRID_NOIEA NEIGHBOUR:	IL3RA	interleukin 3 receptor, alpha chain [Source:MGI Symbol;Acc:MGI:96553]
#INFO:	BIOGRID_NOIEA NEIGHBOUR:	GNL3	guanine nucleotide binding protein-like 3 (nucleolar) [Source:MGI Symbol;Acc:MGI:1353651]
#INFO:	BIOGRID_NOIEA NEIGHBOUR:	TRIM28	tripartite motif-containing 28 [Source:MGI Symbol;Acc:MGI:109274]
#INFO:	BIOGRID_NOIEA NEIGHBOUR:	HMGB2	high mobility group box 2 [Source:MGI Symbol;Acc:MGI:96157]
#INFO:	BIOGRID_NOIEA NEIGHBOUR:	TRP53	transformation related protein 53 [Source:MGI Symbol;Acc:MGI:98834]
#INFO:	BIOGRID_NOIEA NEIGHBOUR:	MIB2	mindbomb E3 ubiquitin protein ligase 2 [Source:MGI Symbol;Acc:MGI:2679684]
#INFO:	BIOGRID_NOIEA NEIGHBOUR:	EPC1	enhancer of polycomb homolog 1 (Drosophila) [Source:MGI Symbol;Acc:MGI:1278322]
#INFO:	BIOGRID_NOIEA NEIGHBOUR:	NGLY1	N-glycanase 1 [Source:MGI Symbol;Acc:MGI:1913276]
#INFO:	BIOGRID_NOIEA NEIGHBOUR:	MRPL43	mitochondrial ribosomal protein L43 [Source:MGI Symbol;Acc:MGI:2137229]
#INFO:	BIOGRID_NOIEA NEIGHBOUR:	HECTD1	HECT domain E3 ubiquitin protein ligase 1 [Source:MGI Symbol;Acc:MGI:2384768]
#INFO:	BIOGRID_NOIEA NEIGHBOUR:	RABEP1	rabaptin, RAB GTPase binding effector protein 1 [Source:MGI Symbol;Acc:MGI:1860236]
#INFO:	BIOGRID_NOIEA NEIGHBOUR:	ITPR1	inositol 1,4,5-trisphosphate receptor 1 [Source:MGI Symbol;Acc:MGI:96623]
#INFO:	BIOGRID_NOIEA NEIGHBOUR:	N4BP1	NEDD4 binding protein 1 [Source:MGI Symbol;Acc:MGI:2136825]
#INFO:	BIOGRID_NOIEA NEIGHBOUR:	RPS4X	ribosomal protein S4, X-linked [Source:MGI Symbol;Acc:MGI:98158]
#INFO:	BIOGRID_NOIEA NEIGHBOUR:	ENO1	enolase 1, alpha non-neuron [Source:MGI Symbol;Acc:MGI:95393]
#INFO:	BIOGRID_NOIEA NEIGHBOUR:	BCAR1	breast cancer anti-estrogen resistance 1 [Source:MGI Symbol;Acc:MGI:108091]
#INFO:	BIOGRID_NOIEA NEIGHBOUR:	BTBD2	BTB (POZ) domain containing 2 [Source:MGI Symbol;Acc:MGI:1933831]
#INFO:	BIOGRID_NOIEA NEIGHBOUR:	HSPA2	heat shock protein 2 [Source:MGI Symbol;Acc:MGI:96243]
#INFO:	BIOGRID_NOIEA NEIGHBOUR:	ACTL6A	actin-like 6A [Source:MGI Symbol;Acc:MGI:1861453]
#INFO:	BIOGRID_NOIEA NEIGHBOUR:	SERBP1	serpine1 mRNA binding protein 1 [Source:MGI Symbol;Acc:MGI:1914120]
#INFO:	BIOGRID_NOIEA NEIGHBOUR:	COPS5	COP9 signalosome subunit 5 [Source:MGI Symbol;Acc:MGI:1349415]
#INFO:	BIOGRID_NOIEA NEIGHBOUR:	YEATS4	YEATS domain containing 4 [Source:MGI Symbol;Acc:MGI:1927224]
#INFO:	BIOGRID_NOIEA NEIGHBOUR:	IGF1R	insulin-like growth factor I receptor [Source:MGI Symbol;Acc:MGI:96433]
#INFO:	BIOGRID_NOIEA NEIGHBOUR:	MNAT1	menage a trois 1 [Source:MGI Symbol;Acc:MGI:106207]
#INFO:	BIOGRID_NOIEA NEIGHBOUR:	LMO2	LIM domain only 2 [Source:MGI Symbol;Acc:MGI:102811]
#INFO:	BIOGRID_NOIEA NEIGHBOUR:	SOD1	superoxide dismutase 1, soluble [Source:MGI Symbol;Acc:MGI:98351]
#INFO:	BIOGRID_NOIEA NEIGHBOUR:	KIF3B	kinesin family member 3B [Source:MGI Symbol;Acc:MGI:107688]
#INFO:	BIOGRID_NOIEA NEIGHBOUR:	SNCAIP	synuclein, alpha interacting protein (synphilin) [Source:MGI Symbol;Acc:MGI:1915097]
#INFO:	BIOGRID_NOIEA NEIGHBOUR:	HSP90AA1	heat shock protein 90, alpha (cytosolic), class A member 1 [Source:MGI Symbol;Acc:MGI:96250]
#INFO:	BIOGRID_NOIEA NEIGHBOUR:	TRIM71	tripartite motif-containing 71 [Source:MGI Symbol;Acc:MGI:2685973]
#INFO:	BIOGRID_NOIEA NEIGHBOUR:	TBRG1	transforming growth factor beta regulated gene 1 [Source:MGI Symbol;Acc:MGI:1100877]
#INFO:	BIOGRID_NOIEA NEIGHBOUR:	ARID1B	AT rich interactive domain 1B (SWI-like) [Source:MGI Symbol;Acc:MGI:1926129]
#INFO:	BIOGRID_NOIEA NEIGHBOUR:	MYO1F	myosin IF [Source:MGI Symbol;Acc:MGI:107711]
#INFO:	BIOGRID_NOIEA NEIGHBOUR:	KLHL2	kelch-like 2, Mayven [Source:MGI Symbol;Acc:MGI:1924363]
#INFO:	BIOGRID_NOIEA NEIGHBOUR:	RAC2	RAS-related C3 botulinum substrate 2 [Source:MGI Symbol;Acc:MGI:97846]
#INFO:	BIOGRID_NOIEA NEIGHBOUR:	ACTG1	actin, gamma, cytoplasmic 1 [Source:MGI Symbol;Acc:MGI:87906]
#INFO:	BIOGRID_NOIEA NEIGHBOUR:	SMURF1	SMAD specific E3 ubiquitin protein ligase 1 [Source:MGI Symbol;Acc:MGI:1923038]
#INFO:	BIOGRID_NOIEA NEIGHBOUR:	SETDB1	SET domain, bifurcated 1 [Source:MGI Symbol;Acc:MGI:1934229]
#INFO:	BIOGRID_NOIEA NEIGHBOUR:	PAX3	paired box 3 [Source:MGI Symbol;Acc:MGI:97487]
#INFO:	BIOGRID_NOIEA NEIGHBOUR:	RUVBL2	RuvB-like protein 2 [Source:MGI Symbol;Acc:MGI:1342299]
#INFO:	BIOGRID_NOIEA NEIGHBOUR:	GTF2E2	general transcription factor II E, polypeptide 2 (beta subunit) [Source:MGI Symbol;Acc:MGI:1915403]
#INFO:	BIOGRID_NOIEA NEIGHBOUR:	FAM104A	family with sequence similarity 104, member A [Source:MGI Symbol;Acc:MGI:106351]
#INFO:
#INFO:	--- BIOGRID_NOIEA graph structure
#INFO:
#INFO:	BIOGRID_NOIEA INTERACTION:	KAT2B*	SMAD1
#INFO:	BIOGRID_NOIEA INTERACTION:	KAT2B*	NOTCH1
#INFO:	BIOGRID_NOIEA INTERACTION:	KAT2B*	CREBBP
#INFO:	BIOGRID_NOIEA INTERACTION:	KAT2B*	CLOCK
#INFO:	BIOGRID_NOIEA INTERACTION:	KAT2B*	ESRRA
#INFO:	BIOGRID_NOIEA INTERACTION:	KAT2B*	HNF1B
#INFO:	BIOGRID_NOIEA INTERACTION:	KAT2B*	RARA
#INFO:	BIOGRID_NOIEA INTERACTION:	KAT2B*	MAFA
#INFO:	BIOGRID_NOIEA INTERACTION:	KAT2B*	GRIP1
#INFO:	BIOGRID_NOIEA INTERACTION:	KAT2B*	MYOD1
#INFO:	BIOGRID_NOIEA INTERACTION:	KAT2B*	EP300
#INFO:	BIOGRID_NOIEA INTERACTION:	KAT2B*	TAL1
#INFO:	BIOGRID_NOIEA INTERACTION:	KAT2B*	HIST2H2AA1
#INFO:	BIOGRID_NOIEA INTERACTION:	KAT2B*	NFE2
#INFO:	BIOGRID_NOIEA INTERACTION:	KAT2B*	KAT2B*
#INFO:	BIOGRID_NOIEA INTERACTION:	KAT2B*	ERCC6
#INFO:	BIOGRID_NOIEA INTERACTION:	KAT2B*	USF1
#INFO:	BIOGRID_NOIEA INTERACTION:	KAT2B*	POLR1A
#INFO:	BIOGRID_NOIEA INTERACTION:	KAT2B*	MYSM1
#INFO:	BIOGRID_NOIEA INTERACTION:	CRY1*	SIN3B
#INFO:	BIOGRID_NOIEA INTERACTION:	CRY1*	CSNK1E
#INFO:	BIOGRID_NOIEA INTERACTION:	CRY1*	PER2
#INFO:	BIOGRID_NOIEA INTERACTION:	CRY1*	USP2
#INFO:	BIOGRID_NOIEA INTERACTION:	CRY1*	CLOCK
#INFO:	BIOGRID_NOIEA INTERACTION:	CRY1*	HDAC2
#INFO:	BIOGRID_NOIEA INTERACTION:	CRY1*	PER1
#INFO:	BIOGRID_NOIEA INTERACTION:	CRY1*	ARNTL
#INFO:	BIOGRID_NOIEA INTERACTION:	CRY1*	HDAC1
#INFO:	BIOGRID_NOIEA INTERACTION:	CRY1*	EZH2
#INFO:	BIOGRID_NOIEA INTERACTION:	CRY1*	TIMELESS
#INFO:	BIOGRID_NOIEA INTERACTION:	CRY1*	PER3
#INFO:	BIOGRID_NOIEA INTERACTION:	CRY1*	FBXL3
#INFO:	BIOGRID_NOIEA INTERACTION:	CRY1*	CRY2
#INFO:	BIOGRID_NOIEA INTERACTION:	RPS5*	RARA
#INFO:	BIOGRID_NOIEA INTERACTION:	RPS5*	EED
#INFO:	BIOGRID_NOIEA INTERACTION:	RPS5*	NPM1
#INFO:	BIOGRID_NOIEA INTERACTION:	PRDX1*	UBE3A
#INFO:	BIOGRID_NOIEA INTERACTION:	PRDX1*	NPHP4
#INFO:	BIOGRID_NOIEA INTERACTION:	PRDX1*	DLG4
#INFO:	BIOGRID_NOIEA INTERACTION:	PRDX1*	EED
#INFO:	BIOGRID_NOIEA INTERACTION:	VPS25*	EED
#INFO:	BIOGRID_NOIEA INTERACTION:	PSMC4*	KRT8
#INFO:	BIOGRID_NOIEA INTERACTION:	PSMC4*	EED
#INFO:	BIOGRID_NOIEA INTERACTION:	PSMC4*	PSMD10
#INFO:	BIOGRID_NOIEA INTERACTION:	PSMC4*	NR1I3
#INFO:	BIOGRID_NOIEA INTERACTION:	PSMC4*	NANOG
#INFO:	BIOGRID_NOIEA INTERACTION:	HNRNPA0*	UBC*
#INFO:	BIOGRID_NOIEA INTERACTION:	HNRNPA0*	EED
#INFO:	BIOGRID_NOIEA INTERACTION:	HNRNPA0*	CXCL2
#INFO:	BIOGRID_NOIEA INTERACTION:	HNRNPA0*	PTGS2
#INFO:	BIOGRID_NOIEA INTERACTION:	HNRNPA0*	MAPKAPK2
#INFO:	BIOGRID_NOIEA INTERACTION:	HNRNPA0*	TNF
#INFO:	BIOGRID_NOIEA INTERACTION:	UBC*	PKLR
#INFO:	BIOGRID_NOIEA INTERACTION:	UBC*	PRKCSH
#INFO:	BIOGRID_NOIEA INTERACTION:	UBC*	USP48
#INFO:	BIOGRID_NOIEA INTERACTION:	UBC*	EGR2
#INFO:	BIOGRID_NOIEA INTERACTION:	UBC*	AK1
#INFO:	BIOGRID_NOIEA INTERACTION:	UBC*	RIPK1
#INFO:	BIOGRID_NOIEA INTERACTION:	UBC*	HSPD1
#INFO:	BIOGRID_NOIEA INTERACTION:	UBC*	IDO1
#INFO:	BIOGRID_NOIEA INTERACTION:	UBC*	DHX32
#INFO:	BIOGRID_NOIEA INTERACTION:	UBC*	UBR5
#INFO:	BIOGRID_NOIEA INTERACTION:	UBC*	SRSF1
#INFO:	BIOGRID_NOIEA INTERACTION:	UBC*	PSMC6
#INFO:	BIOGRID_NOIEA INTERACTION:	UBC*	ATP5C1*
#INFO:	BIOGRID_NOIEA INTERACTION:	UBC*	DLAT
#INFO:	BIOGRID_NOIEA INTERACTION:	UBC*	JUN
#INFO:	BIOGRID_NOIEA INTERACTION:	UBC*	SOX2
#INFO:	BIOGRID_NOIEA INTERACTION:	UBC*	GPC4
#INFO:	BIOGRID_NOIEA INTERACTION:	UBC*	PSMD13
#INFO:	BIOGRID_NOIEA INTERACTION:	UBC*	HIF1A
#INFO:	BIOGRID_NOIEA INTERACTION:	UBC*	PML
#INFO:	BIOGRID_NOIEA INTERACTION:	UBC*	XPNPEP3
#INFO:	BIOGRID_NOIEA INTERACTION:	UBC*	CSNK1E
#INFO:	BIOGRID_NOIEA INTERACTION:	UBC*	MRPL58
#INFO:	BIOGRID_NOIEA INTERACTION:	UBC*	ADCK5
#INFO:	BIOGRID_NOIEA INTERACTION:	UBC*	TRAF3
#INFO:	BIOGRID_NOIEA INTERACTION:	UBC*	TOM1L2
#INFO:	BIOGRID_NOIEA INTERACTION:	UBC*	ASPSCR1
#INFO:	BIOGRID_NOIEA INTERACTION:	UBC*	RPS27
#INFO:	BIOGRID_NOIEA INTERACTION:	UBC*	PYCRL
#INFO:	BIOGRID_NOIEA INTERACTION:	UBC*	PLAA
#INFO:	BIOGRID_NOIEA INTERACTION:	UBC*	NFATC1
#INFO:	BIOGRID_NOIEA INTERACTION:	UBC*	IRF8
#INFO:	BIOGRID_NOIEA INTERACTION:	UBC*	IKBKB
#INFO:	BIOGRID_NOIEA INTERACTION:	UBC*	MCM5
#INFO:	BIOGRID_NOIEA INTERACTION:	UBC*	TIMM17B
#INFO:	BIOGRID_NOIEA INTERACTION:	UBC*	GCH1
#INFO:	BIOGRID_NOIEA INTERACTION:	UBC*	DDX39B
#INFO:	BIOGRID_NOIEA INTERACTION:	UBC*	UBXN1
#INFO:	BIOGRID_NOIEA INTERACTION:	UBC*	SYNJ1
#INFO:	BIOGRID_NOIEA INTERACTION:	UBC*	FANCI
#INFO:	BIOGRID_NOIEA INTERACTION:	UBC*	SLC2A4
#INFO:	BIOGRID_NOIEA INTERACTION:	UBC*	NIPSNAP2*
#INFO:	BIOGRID_NOIEA INTERACTION:	UBC*	BABAM2
#INFO:	BIOGRID_NOIEA INTERACTION:	UBC*	PSMC4*
#INFO:	BIOGRID_NOIEA INTERACTION:	UBC*	ABCF2
#INFO:	BIOGRID_NOIEA INTERACTION:	UBC*	HIST2H4
#INFO:	BIOGRID_NOIEA INTERACTION:	UBC*	ITGA5
#INFO:	BIOGRID_NOIEA INTERACTION:	UBC*	RPS11
#INFO:	BIOGRID_NOIEA INTERACTION:	UBC*	ZBTB33
#INFO:	BIOGRID_NOIEA INTERACTION:	UBC*	TRAF6
#INFO:	BIOGRID_NOIEA INTERACTION:	UBC*	PSMD12*
#INFO:	BIOGRID_NOIEA INTERACTION:	UBC*	DDX5
#INFO:	BIOGRID_NOIEA INTERACTION:	UBC*	PIK3C2B
#INFO:	BIOGRID_NOIEA INTERACTION:	UBC*	CDC27
#INFO:	BIOGRID_NOIEA INTERACTION:	UBC*	COPA
#INFO:	BIOGRID_NOIEA INTERACTION:	UBC*	TMCO1
#INFO:	BIOGRID_NOIEA INTERACTION:	UBC*	DDX56
#INFO:	BIOGRID_NOIEA INTERACTION:	UBC*	ZFP451
#INFO:	BIOGRID_NOIEA INTERACTION:	UBC*	GNL3L
#INFO:	BIOGRID_NOIEA INTERACTION:	UBC*	MYCN
#INFO:	BIOGRID_NOIEA INTERACTION:	UBC*	TERT
#INFO:	BIOGRID_NOIEA INTERACTION:	UBC*	PSMA6
#INFO:	BIOGRID_NOIEA INTERACTION:	UBC*	HECTD4
#INFO:	BIOGRID_NOIEA INTERACTION:	UBC*	USP19
#INFO:	BIOGRID_NOIEA INTERACTION:	UBC*	TPM1
#INFO:	BIOGRID_NOIEA INTERACTION:	UBC*	COPS7A
#INFO:	BIOGRID_NOIEA INTERACTION:	UBC*	AKAP2
#INFO:	BIOGRID_NOIEA INTERACTION:	UBC*	PSMD1
#INFO:	BIOGRID_NOIEA INTERACTION:	UBC*	NOP56
#INFO:	BIOGRID_NOIEA INTERACTION:	UBC*	SLC25A3
#INFO:	BIOGRID_NOIEA INTERACTION:	UBC*	UCHL4
#INFO:	BIOGRID_NOIEA INTERACTION:	UBC*	LPXN
#INFO:	BIOGRID_NOIEA INTERACTION:	UBC*	SLC38A2
#INFO:	BIOGRID_NOIEA INTERACTION:	UBC*	LTBP1
#INFO:	BIOGRID_NOIEA INTERACTION:	UBC*	WRNIP1
#INFO:	BIOGRID_NOIEA INTERACTION:	UBC*	ELOC
#INFO:	BIOGRID_NOIEA INTERACTION:	UBC*	ITPR3
#INFO:	BIOGRID_NOIEA INTERACTION:	UBC*	EIF2S1
#INFO:	BIOGRID_NOIEA INTERACTION:	UBC*	NPLOC4
#INFO:	BIOGRID_NOIEA INTERACTION:	UBC*	CUL5
#INFO:	BIOGRID_NOIEA INTERACTION:	UBC*	RPS24*
#INFO:	BIOGRID_NOIEA INTERACTION:	UBC*	UBE2I
#INFO:	BIOGRID_NOIEA INTERACTION:	UBC*	GGA3
#INFO:	BIOGRID_NOIEA INTERACTION:	UBC*	SLC25A5
#INFO:	BIOGRID_NOIEA INTERACTION:	UBC*	MRPL11
#INFO:	BIOGRID_NOIEA INTERACTION:	UBC*	PABPC6
#INFO:	BIOGRID_NOIEA INTERACTION:	UBC*	HTT
#INFO:	BIOGRID_NOIEA INTERACTION:	UBC*	SKI
#INFO:	BIOGRID_NOIEA INTERACTION:	UBC*	USP46
#INFO:	BIOGRID_NOIEA INTERACTION:	UBC*	BCL3
#INFO:	BIOGRID_NOIEA INTERACTION:	UBC*	ARGLU1
#INFO:	BIOGRID_NOIEA INTERACTION:	UBC*	ABCE1
#INFO:	BIOGRID_NOIEA INTERACTION:	UBC*	ZFYVE19
#INFO:	BIOGRID_NOIEA INTERACTION:	UBC*	GPS1
#INFO:	BIOGRID_NOIEA INTERACTION:	UBC*	BID
#INFO:	BIOGRID_NOIEA INTERACTION:	UBC*	SH3GL2
#INFO:	BIOGRID_NOIEA INTERACTION:	UBC*	LACTB
#INFO:	BIOGRID_NOIEA INTERACTION:	UBC*	VPS36
#INFO:	BIOGRID_NOIEA INTERACTION:	UBC*	TRIM32
#INFO:	BIOGRID_NOIEA INTERACTION:	UBC*	CCDC14
#INFO:	BIOGRID_NOIEA INTERACTION:	UBC*	CFAP36
#INFO:	BIOGRID_NOIEA INTERACTION:	UBC*	UBXN7
#INFO:	BIOGRID_NOIEA INTERACTION:	UBC*	ARHGEF2
#INFO:	BIOGRID_NOIEA INTERACTION:	UBC*	ARHGAP35
#INFO:	BIOGRID_NOIEA INTERACTION:	UBC*	USP47
#INFO:	BIOGRID_NOIEA INTERACTION:	UBC*	HDLBP
#INFO:	BIOGRID_NOIEA INTERACTION:	UBC*	ZFP330
#INFO:	BIOGRID_NOIEA INTERACTION:	UBC*	RPL19
#INFO:	BIOGRID_NOIEA INTERACTION:	UBC*	FOXO3
#INFO:	BIOGRID_NOIEA INTERACTION:	UBC*	OAS3
#INFO:	BIOGRID_NOIEA INTERACTION:	UBC*	ARHGAP29
#INFO:	BIOGRID_NOIEA INTERACTION:	UBC*	TOLLIP
#INFO:	BIOGRID_NOIEA INTERACTION:	UBC*	MRPS22
#INFO:	BIOGRID_NOIEA INTERACTION:	UBC*	VCP
#INFO:	BIOGRID_NOIEA INTERACTION:	UBC*	CSDE1
#INFO:	BIOGRID_NOIEA INTERACTION:	UBC*	MYL12B
#INFO:	BIOGRID_NOIEA INTERACTION:	UBC*	NIFK
#INFO:	BIOGRID_NOIEA INTERACTION:	UBC*	RPL13A
#INFO:	BIOGRID_NOIEA INTERACTION:	UBC*	PELI3
#INFO:	BIOGRID_NOIEA INTERACTION:	UBC*	PIAS4
#INFO:	BIOGRID_NOIEA INTERACTION:	UBC*	RMI1
#INFO:	BIOGRID_NOIEA INTERACTION:	UBC*	TARDBP
#INFO:	BIOGRID_NOIEA INTERACTION:	UBC*	D1PAS1
#INFO:	BIOGRID_NOIEA INTERACTION:	UBC*	MYBBP1A
#INFO:	BIOGRID_NOIEA INTERACTION:	UBC*	RPS23
#INFO:	BIOGRID_NOIEA INTERACTION:	UBC*	RACK1
#INFO:	BIOGRID_NOIEA INTERACTION:	UBC*	UBXN2B
#INFO:	BIOGRID_NOIEA INTERACTION:	UBC*	REV1
#INFO:	BIOGRID_NOIEA INTERACTION:	UBC*	PABPC4
#INFO:	BIOGRID_NOIEA INTERACTION:	UBC*	CD79A
#INFO:	BIOGRID_NOIEA INTERACTION:	UBC*	RUNX2
#INFO:	BIOGRID_NOIEA INTERACTION:	UBC*	PCNA
#INFO:	BIOGRID_NOIEA INTERACTION:	UBC*	DLG3
#INFO:	BIOGRID_NOIEA INTERACTION:	UBC*	CSF1R
#INFO:	BIOGRID_NOIEA INTERACTION:	UBC*	DOCK2
#INFO:	BIOGRID_NOIEA INTERACTION:	UBC*	IDH2
#INFO:	BIOGRID_NOIEA INTERACTION:	UBC*	APPBP2
#INFO:	BIOGRID_NOIEA INTERACTION:	UBC*	DDX17
#INFO:	BIOGRID_NOIEA INTERACTION:	UBC*	RARS
#INFO:	BIOGRID_NOIEA INTERACTION:	UBC*	RPL27
#INFO:	BIOGRID_NOIEA INTERACTION:	UBC*	PSMD7
#INFO:	BIOGRID_NOIEA INTERACTION:	UBC*	RABEP2
#INFO:	BIOGRID_NOIEA INTERACTION:	UBC*	GATA4
#INFO:	BIOGRID_NOIEA INTERACTION:	UBC*	USP16
#INFO:	BIOGRID_NOIEA INTERACTION:	UBC*	EPS15*
#INFO:	BIOGRID_NOIEA INTERACTION:	UBC*	MRPL15
#INFO:	BIOGRID_NOIEA INTERACTION:	UBC*	USP3
#INFO:	BIOGRID_NOIEA INTERACTION:	UBC*	NBR1
#INFO:	BIOGRID_NOIEA INTERACTION:	UBC*	DST
#INFO:	BIOGRID_NOIEA INTERACTION:	UBC*	SRP14
#INFO:	BIOGRID_NOIEA INTERACTION:	UBC*	LUC7L3
#INFO:	BIOGRID_NOIEA INTERACTION:	UBC*	ZC3HAV1L
#INFO:	BIOGRID_NOIEA INTERACTION:	UBC*	MRPL23
#INFO:	BIOGRID_NOIEA INTERACTION:	UBC*	IQGAP1
#INFO:	BIOGRID_NOIEA INTERACTION:	UBC*	RPLP2
#INFO:	BIOGRID_NOIEA INTERACTION:	UBC*	COPS4
#INFO:	BIOGRID_NOIEA INTERACTION:	UBC*	OTUD4
#INFO:	BIOGRID_NOIEA INTERACTION:	UBC*	ZC3HAV1
#INFO:	BIOGRID_NOIEA INTERACTION:	UBC*	UBAP1
#INFO:	BIOGRID_NOIEA INTERACTION:	UBC*	BRCA1
#INFO:	BIOGRID_NOIEA INTERACTION:	UBC*	SRSF3
#INFO:	BIOGRID_NOIEA INTERACTION:	UBC*	NIPSNAP1
#INFO:	BIOGRID_NOIEA INTERACTION:	UBC*	HSPE1
#INFO:	BIOGRID_NOIEA INTERACTION:	UBC*	HNRNPF
#INFO:	BIOGRID_NOIEA INTERACTION:	UBC*	HUWE1
#INFO:	BIOGRID_NOIEA INTERACTION:	UBC*	SHC1
#INFO:	BIOGRID_NOIEA INTERACTION:	UBC*	TSG101
#INFO:	BIOGRID_NOIEA INTERACTION:	UBC*	SSSCA1
#INFO:	BIOGRID_NOIEA INTERACTION:	UBC*	SCNN1B
#INFO:	BIOGRID_NOIEA INTERACTION:	UBC*	BARD1
#INFO:	BIOGRID_NOIEA INTERACTION:	UBC*	RPL24*
#INFO:	BIOGRID_NOIEA INTERACTION:	UBC*	CDC34
#INFO:	BIOGRID_NOIEA INTERACTION:	UBC*	PDPK1
#INFO:	BIOGRID_NOIEA INTERACTION:	UBC*	KIF1A
#INFO:	BIOGRID_NOIEA INTERACTION:	UBC*	VCPIP1
#INFO:	BIOGRID_NOIEA INTERACTION:	UBC*	APLP2
#INFO:	BIOGRID_NOIEA INTERACTION:	UBC*	DNMT1
#INFO:	BIOGRID_NOIEA INTERACTION:	UBC*	RNF138
#INFO:	BIOGRID_NOIEA INTERACTION:	UBC*	TCOF1
#INFO:	BIOGRID_NOIEA INTERACTION:	UBC*	PSMB3
#INFO:	BIOGRID_NOIEA INTERACTION:	UBC*	HSPA9
#INFO:	BIOGRID_NOIEA INTERACTION:	UBC*	MCL1
#INFO:	BIOGRID_NOIEA INTERACTION:	UBC*	DERL1
#INFO:	BIOGRID_NOIEA INTERACTION:	UBC*	RGS19
#INFO:	BIOGRID_NOIEA INTERACTION:	UBC*	HSPA8
#INFO:	BIOGRID_NOIEA INTERACTION:	UBC*	TBX6
#INFO:	BIOGRID_NOIEA INTERACTION:	UBC*	POLK
#INFO:	BIOGRID_NOIEA INTERACTION:	UBC*	CCAR1
#INFO:	BIOGRID_NOIEA INTERACTION:	UBC*	TUBB2B
#INFO:	BIOGRID_NOIEA INTERACTION:	UBC*	RNF31
#INFO:	BIOGRID_NOIEA INTERACTION:	UBC*	USP8
#INFO:	BIOGRID_NOIEA INTERACTION:	UBC*	RECQL
#INFO:	BIOGRID_NOIEA INTERACTION:	UBC*	HSPA5
#INFO:	BIOGRID_NOIEA INTERACTION:	UBC*	MYO1E
#INFO:	BIOGRID_NOIEA INTERACTION:	UBC*	RPL22
#INFO:	BIOGRID_NOIEA INTERACTION:	UBC*	FLNB
#INFO:	BIOGRID_NOIEA INTERACTION:	UBC*	DTYMK
#INFO:	BIOGRID_NOIEA INTERACTION:	UBC*	RPL18A
#INFO:	BIOGRID_NOIEA INTERACTION:	UBC*	BRAP
#INFO:	BIOGRID_NOIEA INTERACTION:	UBC*	RNF115
#INFO:	BIOGRID_NOIEA INTERACTION:	UBC*	ERCC4
#INFO:	BIOGRID_NOIEA INTERACTION:	UBC*	TUBB3
#INFO:	BIOGRID_NOIEA INTERACTION:	UBC*	HSD17B12
#INFO:	BIOGRID_NOIEA INTERACTION:	UBC*	RRBP1
#INFO:	BIOGRID_NOIEA INTERACTION:	UBC*	PPM1B
#INFO:	BIOGRID_NOIEA INTERACTION:	UBC*	RPS2
#INFO:	BIOGRID_NOIEA INTERACTION:	UBC*	STAM2
#INFO:	BIOGRID_NOIEA INTERACTION:	UBC*	REG1
#INFO:	BIOGRID_NOIEA INTERACTION:	UBC*	ZCCHC10
#INFO:	BIOGRID_NOIEA INTERACTION:	UBC*	IIGP1
#INFO:	BIOGRID_NOIEA INTERACTION:	UBC*	AP3D1
#INFO:	BIOGRID_NOIEA INTERACTION:	UBC*	PCMTD1
#INFO:	BIOGRID_NOIEA INTERACTION:	UBC*	ZFAND2A
#INFO:	BIOGRID_NOIEA INTERACTION:	UBC*	GGA1
#INFO:	BIOGRID_NOIEA INTERACTION:	UBC*	TBL3
#INFO:	BIOGRID_NOIEA INTERACTION:	UBC*	RIOK3
#INFO:	BIOGRID_NOIEA INTERACTION:	UBC*	LRP2
#INFO:	BIOGRID_NOIEA INTERACTION:	UBC*	TONSL
#INFO:	BIOGRID_NOIEA INTERACTION:	UBC*	FANCD2
#INFO:	BIOGRID_NOIEA INTERACTION:	UBC*	NTRK1
#INFO:	BIOGRID_NOIEA INTERACTION:	UBC*	RPL34
#INFO:	BIOGRID_NOIEA INTERACTION:	UBC*	RPL8
#INFO:	BIOGRID_NOIEA INTERACTION:	UBC*	UBE2G1
#INFO:	BIOGRID_NOIEA INTERACTION:	UBC*	SYNCRIP
#INFO:	BIOGRID_NOIEA INTERACTION:	UBC*	MYSM1
#INFO:	BIOGRID_NOIEA INTERACTION:	UBC*	XRCC6
#INFO:	BIOGRID_NOIEA INTERACTION:	UBC*	PSMD6
#INFO:	BIOGRID_NOIEA INTERACTION:	UBC*	MLEC
#INFO:	BIOGRID_NOIEA INTERACTION:	UBC*	DIMT1
#INFO:	BIOGRID_NOIEA INTERACTION:	UBC*	SRP68
#INFO:	BIOGRID_NOIEA INTERACTION:	UBC*	USP24
#INFO:	BIOGRID_NOIEA INTERACTION:	UBC*	NEURL4
#INFO:	BIOGRID_NOIEA INTERACTION:	UBC*	IRAK1
#INFO:	BIOGRID_NOIEA INTERACTION:	UBC*	PSMG2
#INFO:	BIOGRID_NOIEA INTERACTION:	UBC*	MORC3
#INFO:	BIOGRID_NOIEA INTERACTION:	UBC*	EBP
#INFO:	BIOGRID_NOIEA INTERACTION:	UBC*	RPL5
#INFO:	BIOGRID_NOIEA INTERACTION:	UBC*	USP11
#INFO:	BIOGRID_NOIEA INTERACTION:	UBC*	CEBPA
#INFO:	BIOGRID_NOIEA INTERACTION:	UBC*	MYO5A
#INFO:	BIOGRID_NOIEA INTERACTION:	UBC*	SRP19*
#INFO:	BIOGRID_NOIEA INTERACTION:	UBC*	TEFM
#INFO:	BIOGRID_NOIEA INTERACTION:	UBC*	PLD6
#INFO:	BIOGRID_NOIEA INTERACTION:	UBC*	ACTN4
#INFO:	BIOGRID_NOIEA INTERACTION:	UBC*	USP40
#INFO:	BIOGRID_NOIEA INTERACTION:	UBC*	CUL2
#INFO:	BIOGRID_NOIEA INTERACTION:	UBC*	FILIP1
#INFO:	BIOGRID_NOIEA INTERACTION:	UBC*	MRPS7
#INFO:	BIOGRID_NOIEA INTERACTION:	UBC*	SLC12A3
#INFO:	BIOGRID_NOIEA INTERACTION:	UBC*	ACTN1
#INFO:	BIOGRID_NOIEA INTERACTION:	UBC*	HDAC6
#INFO:	BIOGRID_NOIEA INTERACTION:	UBC*	USP34
#INFO:	BIOGRID_NOIEA INTERACTION:	UBC*	EEF1A2
#INFO:	BIOGRID_NOIEA INTERACTION:	UBC*	TNKS
#INFO:	BIOGRID_NOIEA INTERACTION:	UBC*	PALLD
#INFO:	BIOGRID_NOIEA INTERACTION:	UBC*	ZRANB3
#INFO:	BIOGRID_NOIEA INTERACTION:	UBC*	FCHO1
#INFO:	BIOGRID_NOIEA INTERACTION:	UBC*	CUL3
#INFO:	BIOGRID_NOIEA INTERACTION:	UBC*	RPS14
#INFO:	BIOGRID_NOIEA INTERACTION:	UBC*	NLRX1
#INFO:	BIOGRID_NOIEA INTERACTION:	UBC*	MAP1LC3A
#INFO:	BIOGRID_NOIEA INTERACTION:	UBC*	CUEDC1
#INFO:	BIOGRID_NOIEA INTERACTION:	UBC*	GATA6
#INFO:	BIOGRID_NOIEA INTERACTION:	UBC*	EIF3C
#INFO:	BIOGRID_NOIEA INTERACTION:	UBC*	PABPC2
#INFO:	BIOGRID_NOIEA INTERACTION:	UBC*	UBL7
#INFO:	BIOGRID_NOIEA INTERACTION:	UBC*	ASCC2
#INFO:	BIOGRID_NOIEA INTERACTION:	UBC*	SNAP25
#INFO:	BIOGRID_NOIEA INTERACTION:	UBC*	CRY1*
#INFO:	BIOGRID_NOIEA INTERACTION:	UBC*	PER2
#INFO:	BIOGRID_NOIEA INTERACTION:	UBC*	PSMB5
#INFO:	BIOGRID_NOIEA INTERACTION:	UBC*	SMAD2
#INFO:	BIOGRID_NOIEA INTERACTION:	UBC*	NR3C2
#INFO:	BIOGRID_NOIEA INTERACTION:	UBC*	NUB1
#INFO:	BIOGRID_NOIEA INTERACTION:	UBC*	PSMC5
#INFO:	BIOGRID_NOIEA INTERACTION:	UBC*	MRPL49
#INFO:	BIOGRID_NOIEA INTERACTION:	UBC*	RLIM
#INFO:	BIOGRID_NOIEA INTERACTION:	UBC*	RIPK2
#INFO:	BIOGRID_NOIEA INTERACTION:	UBC*	LIMS1
#INFO:	BIOGRID_NOIEA INTERACTION:	UBC*	NFE2L2
#INFO:	BIOGRID_NOIEA INTERACTION:	UBC*	RPL38
#INFO:	BIOGRID_NOIEA INTERACTION:	UBC*	MRPS26
#INFO:	BIOGRID_NOIEA INTERACTION:	UBC*	HIST2H2AC
#INFO:	BIOGRID_NOIEA INTERACTION:	UBC*	HERC1
#INFO:	BIOGRID_NOIEA INTERACTION:	UBC*	MRPL38
#INFO:	BIOGRID_NOIEA INTERACTION:	UBC*	IRS4
#INFO:	BIOGRID_NOIEA INTERACTION:	UBC*	RELA
#INFO:	BIOGRID_NOIEA INTERACTION:	UBC*	PSMD14
#INFO:	BIOGRID_NOIEA INTERACTION:	UBC*	TLR4
#INFO:	BIOGRID_NOIEA INTERACTION:	UBC*	HSPB1
#INFO:	BIOGRID_NOIEA INTERACTION:	UBC*	SLC25A31
#INFO:	BIOGRID_NOIEA INTERACTION:	UBC*	ALPL
#INFO:	BIOGRID_NOIEA INTERACTION:	UBC*	HDAC5
#INFO:	BIOGRID_NOIEA INTERACTION:	UBC*	HNRNPD
#INFO:	BIOGRID_NOIEA INTERACTION:	UBC*	SDCBP
#INFO:	BIOGRID_NOIEA INTERACTION:	UBC*	GPHN
#INFO:	BIOGRID_NOIEA INTERACTION:	UBC*	NSUN2
#INFO:	BIOGRID_NOIEA INTERACTION:	UBC*	TRIP4
#INFO:	BIOGRID_NOIEA INTERACTION:	UBC*	GLI2
#INFO:	BIOGRID_NOIEA INTERACTION:	UBC*	PRKCI
#INFO:	BIOGRID_NOIEA INTERACTION:	UBC*	RPL15
#INFO:	BIOGRID_NOIEA INTERACTION:	UBC*	WDR45B
#INFO:	BIOGRID_NOIEA INTERACTION:	UBC*	ZRANB1
#INFO:	BIOGRID_NOIEA INTERACTION:	UBC*	ANKRD13D
#INFO:	BIOGRID_NOIEA INTERACTION:	UBC*	RNF185
#INFO:	BIOGRID_NOIEA INTERACTION:	UBC*	SLC7A5
#INFO:	BIOGRID_NOIEA INTERACTION:	UBC*	LLGL1
#INFO:	BIOGRID_NOIEA INTERACTION:	UBC*	RNF181
#INFO:	BIOGRID_NOIEA INTERACTION:	UBC*	UBE2K
#INFO:	BIOGRID_NOIEA INTERACTION:	UBC*	B2M
#INFO:	BIOGRID_NOIEA INTERACTION:	UBC*	RBCK1
#INFO:	BIOGRID_NOIEA INTERACTION:	UBC*	AP2A1
#INFO:	BIOGRID_NOIEA INTERACTION:	UBC*	EIF4A1
#INFO:	BIOGRID_NOIEA INTERACTION:	UBC*	RPL28
#INFO:	BIOGRID_NOIEA INTERACTION:	UBC*	SAP18
#INFO:	BIOGRID_NOIEA INTERACTION:	UBC*	BECN1
#INFO:	BIOGRID_NOIEA INTERACTION:	UBC*	COX11
#INFO:	BIOGRID_NOIEA INTERACTION:	UBC*	IKBKG
#INFO:	BIOGRID_NOIEA INTERACTION:	UBC*	AIMP2
#INFO:	BIOGRID_NOIEA INTERACTION:	UBC*	RPS5*
#INFO:	BIOGRID_NOIEA INTERACTION:	UBC*	LUC7L2
#INFO:	BIOGRID_NOIEA INTERACTION:	UBC*	CAPN15
#INFO:	BIOGRID_NOIEA INTERACTION:	UBC*	DDX1
#INFO:	BIOGRID_NOIEA INTERACTION:	UBC*	SCPEP1
#INFO:	BIOGRID_NOIEA INTERACTION:	UBC*	TCP1
#INFO:	BIOGRID_NOIEA INTERACTION:	UBC*	TCSTV1
#INFO:	BIOGRID_NOIEA INTERACTION:	UBC*	S100A10
#INFO:	BIOGRID_NOIEA INTERACTION:	UBC*	MOB4
#INFO:	BIOGRID_NOIEA INTERACTION:	UBC*	OASL1
#INFO:	BIOGRID_NOIEA INTERACTION:	UBC*	IARS
#INFO:	BIOGRID_NOIEA INTERACTION:	UBC*	MSX2
#INFO:	BIOGRID_NOIEA INTERACTION:	UBC*	RPS3
#INFO:	BIOGRID_NOIEA INTERACTION:	UBC*	PSMD3
#INFO:	BIOGRID_NOIEA INTERACTION:	UBC*	RAD23B
#INFO:	BIOGRID_NOIEA INTERACTION:	UBC*	PSMC1
#INFO:	BIOGRID_NOIEA INTERACTION:	UBC*	ANP32B
#INFO:	BIOGRID_NOIEA INTERACTION:	UBC*	PDGFRB
#INFO:	BIOGRID_NOIEA INTERACTION:	UBC*	BAX
#INFO:	BIOGRID_NOIEA INTERACTION:	UBC*	ATP5A1
#INFO:	BIOGRID_NOIEA INTERACTION:	UBC*	MPL
#INFO:	BIOGRID_NOIEA INTERACTION:	UBC*	FAF1
#INFO:	BIOGRID_NOIEA INTERACTION:	UBC*	VAMP2
#INFO:	BIOGRID_NOIEA INTERACTION:	UBC*	CASP3
#INFO:	BIOGRID_NOIEA INTERACTION:	UBC*	H2-AB1
#INFO:	BIOGRID_NOIEA INTERACTION:	UBC*	LLGL2
#INFO:	BIOGRID_NOIEA INTERACTION:	UBC*	NOTCH1
#INFO:	BIOGRID_NOIEA INTERACTION:	UBC*	STX1A
#INFO:	BIOGRID_NOIEA INTERACTION:	UBC*	NCSTN
#INFO:	BIOGRID_NOIEA INTERACTION:	UBC*	VPS25*
#INFO:	BIOGRID_NOIEA INTERACTION:	UBC*	DARS
#INFO:	BIOGRID_NOIEA INTERACTION:	UBC*	PDE12
#INFO:	BIOGRID_NOIEA INTERACTION:	UBC*	DBT
#INFO:	BIOGRID_NOIEA INTERACTION:	UBC*	CANX
#INFO:	BIOGRID_NOIEA INTERACTION:	UBC*	USP44
#INFO:	BIOGRID_NOIEA INTERACTION:	UBC*	STAT5A
#INFO:	BIOGRID_NOIEA INTERACTION:	UBC*	MRS2*
#INFO:	BIOGRID_NOIEA INTERACTION:	UBC*	SHCBP1
#INFO:	BIOGRID_NOIEA INTERACTION:	UBC*	BCL2L11
#INFO:	BIOGRID_NOIEA INTERACTION:	UBC*	RABGEF1
#INFO:	BIOGRID_NOIEA INTERACTION:	UBC*	UBE3A
#INFO:	BIOGRID_NOIEA INTERACTION:	UBC*	GTF2E1
#INFO:	BIOGRID_NOIEA INTERACTION:	UBC*	CISD3
#INFO:	BIOGRID_NOIEA INTERACTION:	UBC*	OLA1
#INFO:	BIOGRID_NOIEA INTERACTION:	UBC*	PTEN
#INFO:	BIOGRID_NOIEA INTERACTION:	UBC*	GCDH
#INFO:	BIOGRID_NOIEA INTERACTION:	UBC*	GTPBP4
#INFO:	BIOGRID_NOIEA INTERACTION:	UBC*	UBE2D3
#INFO:	BIOGRID_NOIEA INTERACTION:	UBC*	RPL6
#INFO:	BIOGRID_NOIEA INTERACTION:	UBC*	KLHDC10
#INFO:	BIOGRID_NOIEA INTERACTION:	UBC*	PABPC5
#INFO:	BIOGRID_NOIEA INTERACTION:	UBC*	NVL
#INFO:	BIOGRID_NOIEA INTERACTION:	UBC*	MRPL2
#INFO:	BIOGRID_NOIEA INTERACTION:	UBC*	RRP12
#INFO:	BIOGRID_NOIEA INTERACTION:	UBC*	FOS
#INFO:	BIOGRID_NOIEA INTERACTION:	UBC*	AP2M1
#INFO:	BIOGRID_NOIEA INTERACTION:	UBC*	ERCC1
#INFO:	BIOGRID_NOIEA INTERACTION:	UBC*	AGPAT5
#INFO:	BIOGRID_NOIEA INTERACTION:	UBC*	SGPL1
#INFO:	BIOGRID_NOIEA INTERACTION:	UBC*	NOS2
#INFO:	BIOGRID_NOIEA INTERACTION:	UBC*	PDCD6IP
#INFO:	BIOGRID_NOIEA INTERACTION:	UBC*	MDM2
#INFO:	BIOGRID_NOIEA INTERACTION:	UBC*	TBK1
#INFO:	BIOGRID_NOIEA INTERACTION:	UBC*	PPARG
#INFO:	BIOGRID_NOIEA INTERACTION:	UBC*	UCHL3
#INFO:	BIOGRID_NOIEA INTERACTION:	UBC*	TRAF2
#INFO:	BIOGRID_NOIEA INTERACTION:	UBC*	TRIM25
#INFO:	BIOGRID_NOIEA INTERACTION:	UBC*	GNL3
#INFO:	BIOGRID_NOIEA INTERACTION:	UBC*	TRIM28
#INFO:	BIOGRID_NOIEA INTERACTION:	UBC*	TRP53
#INFO:	BIOGRID_NOIEA INTERACTION:	UBC*	PATZ1
#INFO:	BIOGRID_NOIEA INTERACTION:	UBC*	BHMT
#INFO:	BIOGRID_NOIEA INTERACTION:	UBC*	HSP90AB1
#INFO:	BIOGRID_NOIEA INTERACTION:	UBC*	STRN4
#INFO:	BIOGRID_NOIEA INTERACTION:	UBC*	SRP9
#INFO:	BIOGRID_NOIEA INTERACTION:	UBC*	NCL
#INFO:	BIOGRID_NOIEA INTERACTION:	UBC*	APEH
#INFO:	BIOGRID_NOIEA INTERACTION:	UBC*	RPS4X
#INFO:	BIOGRID_NOIEA INTERACTION:	UBC*	N4BP1
#INFO:	BIOGRID_NOIEA INTERACTION:	UBC*	ENO1
#INFO:	BIOGRID_NOIEA INTERACTION:	UBC*	MIB2
#INFO:	BIOGRID_NOIEA INTERACTION:	UBC*	NGLY1
#INFO:	BIOGRID_NOIEA INTERACTION:	UBC*	HECTD1
#INFO:	BIOGRID_NOIEA INTERACTION:	UBC*	MRPL43
#INFO:	BIOGRID_NOIEA INTERACTION:	UBC*	RABEP1
#INFO:	BIOGRID_NOIEA INTERACTION:	UBC*	ITPR1
#INFO:	BIOGRID_NOIEA INTERACTION:	UBC*	IGF1R
#INFO:	BIOGRID_NOIEA INTERACTION:	UBC*	SOD1
#INFO:	BIOGRID_NOIEA INTERACTION:	UBC*	MNAT1
#INFO:	BIOGRID_NOIEA INTERACTION:	UBC*	BTBD2
#INFO:	BIOGRID_NOIEA INTERACTION:	UBC*	HSPA2
#INFO:	BIOGRID_NOIEA INTERACTION:	UBC*	SERBP1
#INFO:	BIOGRID_NOIEA INTERACTION:	UBC*	COPS5
#INFO:	BIOGRID_NOIEA INTERACTION:	UBC*	SMURF1
#INFO:	BIOGRID_NOIEA INTERACTION:	UBC*	SETDB1
#INFO:	BIOGRID_NOIEA INTERACTION:	UBC*	GTF2E2
#INFO:	BIOGRID_NOIEA INTERACTION:	UBC*	FAM104A
#INFO:	BIOGRID_NOIEA INTERACTION:	UBC*	SNCAIP
#INFO:	BIOGRID_NOIEA INTERACTION:	UBC*	HSP90AA1
#INFO:	BIOGRID_NOIEA INTERACTION:	UBC*	TRIM71
#INFO:	BIOGRID_NOIEA INTERACTION:	UBC*	KLHL2
#INFO:	BIOGRID_NOIEA INTERACTION:	UBC*	MYO1F
#INFO:	BIOGRID_NOIEA INTERACTION:	UBC*	RAC2
#INFO:	BIOGRID_NOIEA INTERACTION:	UBC*	DGKZ
#INFO:	BIOGRID_NOIEA INTERACTION:	UBC*	MDM4
#INFO:	BIOGRID_NOIEA INTERACTION:	UBC*	VEGFA
#INFO:	BIOGRID_NOIEA INTERACTION:	UBC*	COPS2
#INFO:	BIOGRID_NOIEA INTERACTION:	UBC*	UFD1
#INFO:	BIOGRID_NOIEA INTERACTION:	UBC*	URGCP
#INFO:	BIOGRID_NOIEA INTERACTION:	UBC*	STAM
#INFO:	BIOGRID_NOIEA INTERACTION:	UBC*	USP9X
#INFO:	BIOGRID_NOIEA INTERACTION:	UBC*	PRMT1
#INFO:	BIOGRID_NOIEA INTERACTION:	UBC*	UBAC1
#INFO:	BIOGRID_NOIEA INTERACTION:	UBC*	NSFL1C
#INFO:	BIOGRID_NOIEA INTERACTION:	UBC*	DES
#INFO:	BIOGRID_NOIEA INTERACTION:	UBC*	COPS6
#INFO:	BIOGRID_NOIEA INTERACTION:	UBC*	CDKN2A
#INFO:	BIOGRID_NOIEA INTERACTION:	UBC*	PCNT
#INFO:	BIOGRID_NOIEA INTERACTION:	UBC*	PSMB2*
#INFO:	BIOGRID_NOIEA INTERACTION:	UBC*	SNCA
#INFO:	BIOGRID_NOIEA INTERACTION:	UBC*	SND1
#INFO:	BIOGRID_NOIEA INTERACTION:	UBC*	ZFP281
#INFO:	BIOGRID_NOIEA INTERACTION:	UBC*	GIPC1
#INFO:	BIOGRID_NOIEA INTERACTION:	UBC*	RPL30
#INFO:	BIOGRID_NOIEA INTERACTION:	UBC*	AP3B1
#INFO:	BIOGRID_NOIEA INTERACTION:	UBC*	USP12
#INFO:	BIOGRID_NOIEA INTERACTION:	UBC*	DUT
#INFO:	BIOGRID_NOIEA INTERACTION:	UBC*	RAD18
#INFO:	BIOGRID_NOIEA INTERACTION:	UBC*	RPS15*
#INFO:	BIOGRID_NOIEA INTERACTION:	UBC*	PSMD2
#INFO:	BIOGRID_NOIEA INTERACTION:	UBC*	ASCC3
#INFO:	BIOGRID_NOIEA INTERACTION:	UBC*	MITF
#INFO:	BIOGRID_NOIEA INTERACTION:	UBC*	RPL12
#INFO:	BIOGRID_NOIEA INTERACTION:	UBC*	RPL23
#INFO:	BIOGRID_NOIEA INTERACTION:	UBC*	EIF2S2
#INFO:	BIOGRID_NOIEA INTERACTION:	UBC*	HNRNPUL1
#INFO:	BIOGRID_NOIEA INTERACTION:	UBC*	PARP1
#INFO:	BIOGRID_NOIEA INTERACTION:	UBC*	TCSTV3
#INFO:	BIOGRID_NOIEA INTERACTION:	UBC*	GNB1
#INFO:	BIOGRID_NOIEA INTERACTION:	UBC*	RPL13
#INFO:	BIOGRID_NOIEA INTERACTION:	UBC*	SPTAN1
#INFO:	BIOGRID_NOIEA INTERACTION:	UBC*	EPN2
#INFO:	BIOGRID_NOIEA INTERACTION:	UBC*	PAX6
#INFO:	BIOGRID_NOIEA INTERACTION:	UBC*	PCMTD2
#INFO:	BIOGRID_NOIEA INTERACTION:	UBC*	FBXO31
#INFO:	BIOGRID_NOIEA INTERACTION:	UBC*	ADRM1
#INFO:	BIOGRID_NOIEA INTERACTION:	UBC*	LSM14A
#INFO:	BIOGRID_NOIEA INTERACTION:	UBC*	HNRNPU
#INFO:	BIOGRID_NOIEA INTERACTION:	UBC*	CTNND1
#INFO:	BIOGRID_NOIEA INTERACTION:	UBC*	UBXN6
#INFO:	BIOGRID_NOIEA INTERACTION:	UBC*	PABPC1
#INFO:	BIOGRID_NOIEA INTERACTION:	UBC*	SGTA
#INFO:	BIOGRID_NOIEA INTERACTION:	UBC*	MTDH
#INFO:	BIOGRID_NOIEA INTERACTION:	UBC*	NKX2-5
#INFO:	BIOGRID_NOIEA INTERACTION:	UBC*	TAB2
#INFO:	BIOGRID_NOIEA INTERACTION:	UBC*	PSMA1
#INFO:	BIOGRID_NOIEA INTERACTION:	UBC*	MYH3
#INFO:	BIOGRID_NOIEA INTERACTION:	UBC*	DNAJC21
#INFO:	BIOGRID_NOIEA INTERACTION:	UBC*	HIP1
#INFO:	BIOGRID_NOIEA INTERACTION:	UBC*	GLI3
#INFO:	BIOGRID_NOIEA INTERACTION:	UBC*	RPL27A
#INFO:	BIOGRID_NOIEA INTERACTION:	UBC*	RPL32
#INFO:	BIOGRID_NOIEA INTERACTION:	UBC*	UQCRH
#INFO:	BIOGRID_NOIEA INTERACTION:	UBC*	NGFR
#INFO:	BIOGRID_NOIEA INTERACTION:	UBC*	ANP32E
#INFO:	BIOGRID_NOIEA INTERACTION:	UBC*	LMTK2
#INFO:	BIOGRID_NOIEA INTERACTION:	UBC*	UBE4B
#INFO:	BIOGRID_NOIEA INTERACTION:	UBC*	DUSP1
#INFO:	BIOGRID_NOIEA INTERACTION:	UBC*	TIMM8A1
#INFO:	BIOGRID_NOIEA INTERACTION:	UBC*	ATAD3A
#INFO:	BIOGRID_NOIEA INTERACTION:	UBC*	TMEM160
#INFO:	BIOGRID_NOIEA INTERACTION:	UBC*	TRAF4
#INFO:	BIOGRID_NOIEA INTERACTION:	UBC*	ASCC1
#INFO:	BIOGRID_NOIEA INTERACTION:	UBC*	DNM2
#INFO:	BIOGRID_NOIEA INTERACTION:	UBC*	PLEC
#INFO:	BIOGRID_NOIEA INTERACTION:	UBC*	MRPL47
#INFO:	BIOGRID_NOIEA INTERACTION:	UBC*	TNFAIP3
#INFO:	BIOGRID_NOIEA INTERACTION:	UBC*	SRRM1
#INFO:	BIOGRID_NOIEA INTERACTION:	UBC*	RNF168
#INFO:	BIOGRID_NOIEA INTERACTION:	UBC*	EZR
#INFO:	BIOGRID_NOIEA INTERACTION:	UBC*	USP7
#INFO:	BIOGRID_NOIEA INTERACTION:	UBC*	ABRAXAS2
#INFO:	BIOGRID_NOIEA INTERACTION:	UBC*	RPL7
#INFO:	BIOGRID_NOIEA INTERACTION:	UBC*	ANKRD37
#INFO:	BIOGRID_NOIEA INTERACTION:	UBC*	OTULIN
#INFO:	BIOGRID_NOIEA INTERACTION:	UBC*	PSMB4
#INFO:	BIOGRID_NOIEA INTERACTION:	UBC*	ZFAND5
#INFO:	BIOGRID_NOIEA INTERACTION:	UBC*	MYO9B
#INFO:	BIOGRID_NOIEA INTERACTION:	UBC*	STON2
#INFO:	BIOGRID_NOIEA INTERACTION:	UBC*	LAMA1
#INFO:	BIOGRID_NOIEA INTERACTION:	UBC*	2210011C24RIK
#INFO:	BIOGRID_NOIEA INTERACTION:	UBC*	RNH1
#INFO:	BIOGRID_NOIEA INTERACTION:	UBC*	SNX27
#INFO:	BIOGRID_NOIEA INTERACTION:	UBC*	SMAD1
#INFO:	BIOGRID_NOIEA INTERACTION:	UBC*	ARHGEF15
#INFO:	BIOGRID_NOIEA INTERACTION:	UBC*	SSB
#INFO:	BIOGRID_NOIEA INTERACTION:	UBC*	ABRAXAS1
#INFO:	BIOGRID_NOIEA INTERACTION:	UBC*	TMEM165*
#INFO:	BIOGRID_NOIEA INTERACTION:	UBC*	UBE3B*
#INFO:	BIOGRID_NOIEA INTERACTION:	UBC*	TEX19.1
#INFO:	BIOGRID_NOIEA INTERACTION:	UBC*	MRPL22
#INFO:	BIOGRID_NOIEA INTERACTION:	UBC*	USP15
#INFO:	BIOGRID_NOIEA INTERACTION:	UBC*	RPS9
#INFO:	BIOGRID_NOIEA INTERACTION:	UBC*	MYCBP
#INFO:	BIOGRID_NOIEA INTERACTION:	UBC*	RPL37A*
#INFO:	BIOGRID_NOIEA INTERACTION:	UBC*	USP32
#INFO:	BIOGRID_NOIEA INTERACTION:	UBC*	EEF1G
#INFO:	BIOGRID_NOIEA INTERACTION:	UBC*	AP2B1
#INFO:	BIOGRID_NOIEA INTERACTION:	UBC*	NDE1
#INFO:	BIOGRID_NOIEA INTERACTION:	UBC*	BIRC3
#INFO:	BIOGRID_NOIEA INTERACTION:	UBC*	CAMK1
#INFO:	BIOGRID_NOIEA INTERACTION:	UBC*	TBC1D15
#INFO:	BIOGRID_NOIEA INTERACTION:	UBC*	LCK
#INFO:	BIOGRID_NOIEA INTERACTION:	UBC*	FMR1
#INFO:	BIOGRID_NOIEA INTERACTION:	UBC*	TDP2
#INFO:	BIOGRID_NOIEA INTERACTION:	UBC*	USP25
#INFO:	BIOGRID_NOIEA INTERACTION:	UBC*	CYLD
#INFO:	BIOGRID_NOIEA INTERACTION:	UBC*	MYOG
#INFO:	BIOGRID_NOIEA INTERACTION:	UBC*	TCF3
#INFO:	BIOGRID_NOIEA INTERACTION:	UBC*	ZFP110
#INFO:	BIOGRID_NOIEA INTERACTION:	UBC*	CBLB
#INFO:	BIOGRID_NOIEA INTERACTION:	UBC*	SPATA2
#INFO:	BIOGRID_NOIEA INTERACTION:	UBC*	TNK2
#INFO:	BIOGRID_NOIEA INTERACTION:	UBC*	SNF8
#INFO:	BIOGRID_NOIEA INTERACTION:	UBC*	UCHL5
#INFO:	BIOGRID_NOIEA INTERACTION:	UBC*	RPL4
[truncated: 437 more rows]
