# Supplementary material for: Ablation of STAT3 in Purkinje cells reorganizes cerebellar synaptic plasticity in long-term fear memory network
Source: eLife. 2021 Jan 18;10:e63291. doi: 10.7554/eLife.63291 (PMC7813544; doi:10.7554/eLife.63291)
Supplement: Figure 2—source data 4. [file elife-63291-fig2-data4.xlsx]

## Sheet: gProfiler
#	signf	p-value	T	Q	Q&T	Q&T/Q	Q&T/T	term ID	t type	t group	t name	t depth	Q&T list
1	!	2.52e-33	1941	2501	435	0.174	0.224	GO:0004872	MF	1	receptor activity	1	ENSMUSG00000000766,ENSMUSG00000004654,ENSMUSG00000004655,ENSMUSG00000005268,ENSMUSG00000005640,ENSMUSG00000005952,ENSMUSG00000005958,ENSMUSG00000006389,ENSMUSG00000006445,ENSMUSG00000008590,ENSMUSG00000010751,ENSMUSG00000014609,ENSMUSG00000015316,ENSMUSG00000017652,ENSMUSG00000018595,ENSMUSG00000019429,ENSMUSG00000019768,ENSMUSG00000019905,ENSMUSG00000020007,ENSMUSG00000020090,ENSMUSG00000020357,…
1	!	8.74e-33	1987	2501	441	0.176	0.222	GO:0060089	MF	1	molecular transducer activity	1	ENSMUSG00000000766,ENSMUSG00000004654,ENSMUSG00000004655,ENSMUSG00000005268,ENSMUSG00000005640,ENSMUSG00000005952,ENSMUSG00000005958,ENSMUSG00000006389,ENSMUSG00000006445,ENSMUSG00000008590,ENSMUSG00000010751,ENSMUSG00000014609,ENSMUSG00000015316,ENSMUSG00000017652,ENSMUSG00000018595,ENSMUSG00000019429,ENSMUSG00000019768,ENSMUSG00000019905,ENSMUSG00000019942,ENSMUSG00000020007,ENSMUSG00000020090,…
1	!	2.93e-31	1784	2501	403	0.161	0.226	GO:0099600	MF	1	transmembrane receptor activity	1	ENSMUSG00000000766,ENSMUSG00000004654,ENSMUSG00000004655,ENSMUSG00000005268,ENSMUSG00000005640,ENSMUSG00000005952,ENSMUSG00000005958,ENSMUSG00000006389,ENSMUSG00000006445,ENSMUSG00000008590,ENSMUSG00000010751,ENSMUSG00000014609,ENSMUSG00000017652,ENSMUSG00000018595,ENSMUSG00000019429,ENSMUSG00000019905,ENSMUSG00000020007,ENSMUSG00000020090,ENSMUSG00000020357,ENSMUSG00000020695,ENSMUSG00000021070,…
1	!	8.35e-31	1804	2501	405	0.162	0.225	GO:0038023	MF	1	signaling receptor activity	1	ENSMUSG00000000766,ENSMUSG00000004654,ENSMUSG00000005268,ENSMUSG00000005640,ENSMUSG00000005952,ENSMUSG00000005958,ENSMUSG00000006389,ENSMUSG00000006445,ENSMUSG00000008590,ENSMUSG00000010751,ENSMUSG00000014609,ENSMUSG00000017652,ENSMUSG00000018595,ENSMUSG00000019429,ENSMUSG00000019768,ENSMUSG00000019905,ENSMUSG00000020007,ENSMUSG00000020090,ENSMUSG00000020357,ENSMUSG00000020695,ENSMUSG00000021055,…
1	!	1.75e-29	1755	2501	393	0.157	0.224	GO:0004888	MF	1	transmembrane signaling receptor activity	1	ENSMUSG00000000766,ENSMUSG00000004654,ENSMUSG00000005268,ENSMUSG00000005640,ENSMUSG00000005952,ENSMUSG00000005958,ENSMUSG00000006389,ENSMUSG00000006445,ENSMUSG00000008590,ENSMUSG00000010751,ENSMUSG00000014609,ENSMUSG00000017652,ENSMUSG00000018595,ENSMUSG00000019429,ENSMUSG00000019905,ENSMUSG00000020007,ENSMUSG00000020090,ENSMUSG00000020357,ENSMUSG00000020695,ENSMUSG00000021070,ENSMUSG00000021675,…
1	!	1.96e-25	1992	2501	419	0.168	0.21	GO:0004871	MF	1	signal transducer activity	1	ENSMUSG00000000766,ENSMUSG00000004043,ENSMUSG00000004654,ENSMUSG00000005057,ENSMUSG00000005268,ENSMUSG00000005640,ENSMUSG00000005952,ENSMUSG00000005958,ENSMUSG00000006389,ENSMUSG00000006445,ENSMUSG00000008590,ENSMUSG00000010751,ENSMUSG00000014609,ENSMUSG00000017652,ENSMUSG00000018595,ENSMUSG00000019429,ENSMUSG00000019768,ENSMUSG00000019905,ENSMUSG00000020007,ENSMUSG00000020090,ENSMUSG00000020357,…
1	!	2.45e-20	1556	2501	332	0.133	0.213	GO:0007186	BP	1	G-protein coupled receptor signaling pathway	1	ENSMUSG00000000766,ENSMUSG00000004654,ENSMUSG00000018595,ENSMUSG00000019122,ENSMUSG00000019429,ENSMUSG00000019768,ENSMUSG00000019905,ENSMUSG00000020599,ENSMUSG00000020798,ENSMUSG00000020872,ENSMUSG00000021457,ENSMUSG00000021647,ENSMUSG00000021675,ENSMUSG00000021721,ENSMUSG00000024697,ENSMUSG00000025127,ENSMUSG00000025386,ENSMUSG00000025905,ENSMUSG00000026180,ENSMUSG00000026271,ENSMUSG00000026322,…
1	!	2.64e-20	2814	2501	527	0.211	0.187	GO:0016021	CC	1	integral component of membrane	1	ENSMUSG00000000244,ENSMUSG00000000766,ENSMUSG00000001095,ENSMUSG00000001225,ENSMUSG00000001249,ENSMUSG00000003341,ENSMUSG00000004446,ENSMUSG00000004654,ENSMUSG00000004655,ENSMUSG00000005952,ENSMUSG00000005958,ENSMUSG00000006345,ENSMUSG00000006445,ENSMUSG00000006574,ENSMUSG00000006649,ENSMUSG00000008590,ENSMUSG00000009545,ENSMUSG00000010751,ENSMUSG00000012428,ENSMUSG00000014609,ENSMUSG00000015314,…
1	!	2.1e-19	2886	2501	534	0.214	0.185	GO:0031224	CC	1	intrinsic component of membrane	1	ENSMUSG00000000244,ENSMUSG00000000766,ENSMUSG00000001095,ENSMUSG00000001225,ENSMUSG00000001249,ENSMUSG00000003341,ENSMUSG00000004446,ENSMUSG00000004654,ENSMUSG00000004655,ENSMUSG00000005952,ENSMUSG00000005958,ENSMUSG00000006345,ENSMUSG00000006445,ENSMUSG00000006574,ENSMUSG00000006649,ENSMUSG00000008590,ENSMUSG00000009545,ENSMUSG00000010751,ENSMUSG00000012428,ENSMUSG00000014609,ENSMUSG00000015314,…
1	!	7.61e-16	6669	2501	1043	0.417	0.156	GO:0032501	BP	1	multicellular organismal process	1	ENSMUSG00000000093,ENSMUSG00000000126,ENSMUSG00000000184,ENSMUSG00000000244,ENSMUSG00000000247,ENSMUSG00000000320,ENSMUSG00000000409,ENSMUSG00000000435,ENSMUSG00000000486,ENSMUSG00000000690,ENSMUSG00000000706,ENSMUSG00000000731,ENSMUSG00000000766,ENSMUSG00000000817,ENSMUSG00000001225,ENSMUSG00000001249,ENSMUSG00000001444,ENSMUSG00000001497,ENSMUSG00000001655,ENSMUSG00000001656,ENSMUSG00000001657,…
1	!	9.86e-15	2450	2501	449	0.18	0.183	GO:0003008	BP	1	system process	1	ENSMUSG00000000093,ENSMUSG00000000184,ENSMUSG00000000766,ENSMUSG00000001249,ENSMUSG00000004655,ENSMUSG00000005952,ENSMUSG00000006649,ENSMUSG00000009545,ENSMUSG00000012520,ENSMUSG00000012819,ENSMUSG00000014776,ENSMUSG00000014813,ENSMUSG00000015619,ENSMUSG00000016494,ENSMUSG00000017446,ENSMUSG00000018238,ENSMUSG00000018604,ENSMUSG00000019429,ENSMUSG00000020357,ENSMUSG00000020542,ENSMUSG00000020826,…
1	!	5.97e-14	1649	2501	324	0.13	0.196	GO:0007600	BP	1	sensory perception	1	ENSMUSG00000000766,ENSMUSG00000001249,ENSMUSG00000004655,ENSMUSG00000005952,ENSMUSG00000012819,ENSMUSG00000020892,ENSMUSG00000022676,ENSMUSG00000023979,ENSMUSG00000024497,ENSMUSG00000025389,ENSMUSG00000025401,ENSMUSG00000025905,ENSMUSG00000026417,ENSMUSG00000027463,ENSMUSG00000027577,ENSMUSG00000027820,ENSMUSG00000027966,ENSMUSG00000028738,ENSMUSG00000029205,ENSMUSG00000029503,ENSMUSG00000030324,…
1	!	1.64e-13	285	1051	89	0.085	0.312	KEGG:04080	keg	1	Neuroactive ligand-receptor interaction	1	ENSMUSG00000000562,ENSMUSG00000000766,ENSMUSG00000004654,ENSMUSG00000005268,ENSMUSG00000005952,ENSMUSG00000014609,ENSMUSG00000020090,ENSMUSG00000021070,ENSMUSG00000021675,ENSMUSG00000021721,ENSMUSG00000022041,ENSMUSG00000023192,ENSMUSG00000024553,ENSMUSG00000025127,ENSMUSG00000025905,ENSMUSG00000026253,ENSMUSG00000026271,ENSMUSG00000026322,ENSMUSG00000026432,ENSMUSG00000027107,ENSMUSG00000027568,…
1	!	1.87e-13	404	2501	113	0.045	0.28	GO:0004930	MF	1	G-protein coupled receptor activity	1	ENSMUSG00000000766,ENSMUSG00000004654,ENSMUSG00000019429,ENSMUSG00000019905,ENSMUSG00000020090,ENSMUSG00000021070,ENSMUSG00000021675,ENSMUSG00000021721,ENSMUSG00000023192,ENSMUSG00000024553,ENSMUSG00000025127,ENSMUSG00000025804,ENSMUSG00000025905,ENSMUSG00000026180,ENSMUSG00000026271,ENSMUSG00000026322,ENSMUSG00000026432,ENSMUSG00000027568,ENSMUSG00000028012,ENSMUSG00000028036,ENSMUSG00000028747,…
1	!	1.07e-12	1093	2501	231	0.092	0.211	GO:0005887	CC	1	integral component of plasma membrane	1	ENSMUSG00000000244,ENSMUSG00000000766,ENSMUSG00000001095,ENSMUSG00000001225,ENSMUSG00000001249,ENSMUSG00000004655,ENSMUSG00000005952,ENSMUSG00000005958,ENSMUSG00000006345,ENSMUSG00000006445,ENSMUSG00000006574,ENSMUSG00000006649,ENSMUSG00000008590,ENSMUSG00000009545,ENSMUSG00000010751,ENSMUSG00000012428,ENSMUSG00000014609,ENSMUSG00000015314,ENSMUSG00000016494,ENSMUSG00000017446,ENSMUSG00000017652,…
1	!	1.01e-11	1077	2501	225	0.09	0.209	GO:0007608	BP	1	sensory perception of smell	1	ENSMUSG00000031789,ENSMUSG00000035932,ENSMUSG00000043310,ENSMUSG00000043366,ENSMUSG00000043529,ENSMUSG00000043698,ENSMUSG00000043911,ENSMUSG00000044061,ENSMUSG00000044205,ENSMUSG00000044286,ENSMUSG00000044487,ENSMUSG00000044824,ENSMUSG00000044899,ENSMUSG00000044923,ENSMUSG00000044985,ENSMUSG00000044994,ENSMUSG00000045013,ENSMUSG00000045202,ENSMUSG00000045508,ENSMUSG00000045780,ENSMUSG00000045824,…
1	!	1.07e-11	1152	2501	237	0.095	0.206	GO:0031226	CC	1	intrinsic component of plasma membrane	1	ENSMUSG00000000244,ENSMUSG00000000766,ENSMUSG00000001095,ENSMUSG00000001225,ENSMUSG00000001249,ENSMUSG00000004655,ENSMUSG00000005952,ENSMUSG00000005958,ENSMUSG00000006345,ENSMUSG00000006445,ENSMUSG00000006574,ENSMUSG00000006649,ENSMUSG00000008590,ENSMUSG00000009545,ENSMUSG00000010751,ENSMUSG00000012428,ENSMUSG00000014609,ENSMUSG00000015314,ENSMUSG00000016494,ENSMUSG00000017446,ENSMUSG00000017652,…
1	!	1.18e-11	1060	2501	222	0.089	0.209	GO:0004984	MF	1	olfactory receptor activity	1	ENSMUSG00000035932,ENSMUSG00000043310,ENSMUSG00000043366,ENSMUSG00000043529,ENSMUSG00000043698,ENSMUSG00000043911,ENSMUSG00000044061,ENSMUSG00000044205,ENSMUSG00000044286,ENSMUSG00000044487,ENSMUSG00000044824,ENSMUSG00000044899,ENSMUSG00000044923,ENSMUSG00000044985,ENSMUSG00000044994,ENSMUSG00000045013,ENSMUSG00000045202,ENSMUSG00000045508,ENSMUSG00000045780,ENSMUSG00000045824,ENSMUSG00000046272,…
1	!	3.34e-11	3563	2501	592	0.237	0.166	GO:0071944	CC	1	cell periphery	1	ENSMUSG00000000244,ENSMUSG00000000320,ENSMUSG00000000409,ENSMUSG00000000766,ENSMUSG00000000794,ENSMUSG00000000817,ENSMUSG00000001095,ENSMUSG00000001225,ENSMUSG00000001249,ENSMUSG00000001333,ENSMUSG00000001403,ENSMUSG00000002699,ENSMUSG00000003341,ENSMUSG00000003882,ENSMUSG00000003934,ENSMUSG00000004609,ENSMUSG00000004654,ENSMUSG00000004655,ENSMUSG00000005057,ENSMUSG00000005947,ENSMUSG00000005952,…
1	!	1.12e-10	1098	1051	225	0.214	0.205	KEGG:04740	keg	1	Olfactory transduction	1	ENSMUSG00000020890,ENSMUSG00000026114,ENSMUSG00000031789,ENSMUSG00000035932,ENSMUSG00000036647,ENSMUSG00000038115,ENSMUSG00000043310,ENSMUSG00000043366,ENSMUSG00000043529,ENSMUSG00000043698,ENSMUSG00000043911,ENSMUSG00000044061,ENSMUSG00000044205,ENSMUSG00000044286,ENSMUSG00000044487,ENSMUSG00000044824,ENSMUSG00000044899,ENSMUSG00000044923,ENSMUSG00000044985,ENSMUSG00000044994,ENSMUSG00000045013,…
1	!	1.66e-10	3442	2501	571	0.228	0.166	GO:0005886	CC	1	plasma membrane	1	ENSMUSG00000000244,ENSMUSG00000000320,ENSMUSG00000000409,ENSMUSG00000000766,ENSMUSG00000000794,ENSMUSG00000000817,ENSMUSG00000001095,ENSMUSG00000001225,ENSMUSG00000001249,ENSMUSG00000001333,ENSMUSG00000001403,ENSMUSG00000002699,ENSMUSG00000003341,ENSMUSG00000003882,ENSMUSG00000003934,ENSMUSG00000004609,ENSMUSG00000004654,ENSMUSG00000004655,ENSMUSG00000005057,ENSMUSG00000005947,ENSMUSG00000005952,…
1	!	4.85e-10	1396	2501	269	0.108	0.193	GO:0007606	BP	1	sensory perception of chemical stimulus	1	ENSMUSG00000005952,ENSMUSG00000026417,ENSMUSG00000028738,ENSMUSG00000029503,ENSMUSG00000031789,ENSMUSG00000033355,ENSMUSG00000035932,ENSMUSG00000037053,ENSMUSG00000043310,ENSMUSG00000043366,ENSMUSG00000043529,ENSMUSG00000043698,ENSMUSG00000043911,ENSMUSG00000044061,ENSMUSG00000044205,ENSMUSG00000044286,ENSMUSG00000044487,ENSMUSG00000044824,ENSMUSG00000044899,ENSMUSG00000044923,ENSMUSG00000044985,…
1	!	6.39e-10	10602	2712	1560	0.575	0.147	TF:M07429_1	tf	1	Factor: SMAD3; motif: CAGACAS; match class: 1	1	ENSMUSG00000000093,ENSMUSG00000000184,ENSMUSG00000000244,ENSMUSG00000000320,ENSMUSG00000000359,ENSMUSG00000000409,ENSMUSG00000000435,ENSMUSG00000000706,ENSMUSG00000000766,ENSMUSG00000000817,ENSMUSG00000000884,ENSMUSG00000001027,ENSMUSG00000001095,ENSMUSG00000001225,ENSMUSG00000001403,ENSMUSG00000001444,ENSMUSG00000001494,ENSMUSG00000001497,ENSMUSG00000001517,ENSMUSG00000001588,ENSMUSG00000001655,…
1	!	1.11e-09	1948	2501	351	0.14	0.18	GO:0050877	BP	1	nervous system process	1	ENSMUSG00000000184,ENSMUSG00000000766,ENSMUSG00000001249,ENSMUSG00000004655,ENSMUSG00000005952,ENSMUSG00000012520,ENSMUSG00000012819,ENSMUSG00000020892,ENSMUSG00000021647,ENSMUSG00000022596,ENSMUSG00000022676,ENSMUSG00000023979,ENSMUSG00000024497,ENSMUSG00000025389,ENSMUSG00000025401,ENSMUSG00000025905,ENSMUSG00000026417,ENSMUSG00000026686,ENSMUSG00000027107,ENSMUSG00000027210,ENSMUSG00000027463,…
1	!	5.46e-09	678	2501	150	0.06	0.221	GO:0000981	MF	1	RNA polymerase II transcription factor activity, sequence-specific DNA binding	1	ENSMUSG00000000093,ENSMUSG00000000247,ENSMUSG00000000435,ENSMUSG00000001497,ENSMUSG00000001655,ENSMUSG00000001656,ENSMUSG00000002057,ENSMUSG00000002983,ENSMUSG00000003032,ENSMUSG00000003282,ENSMUSG00000003545,ENSMUSG00000004043,ENSMUSG00000004359,ENSMUSG00000004661,ENSMUSG00000005148,ENSMUSG00000005373,ENSMUSG00000005677,ENSMUSG00000005917,ENSMUSG00000008496,ENSMUSG00000009248,ENSMUSG00000012350,…
1	!	1.17e-08	369	2501	95	0.038	0.257	GO:0001228	MF	1	transcriptional activator activity, RNA polymerase II transcription regulatory region sequence-specific binding	1	ENSMUSG00000000247,ENSMUSG00000000435,ENSMUSG00000001497,ENSMUSG00000001655,ENSMUSG00000001656,ENSMUSG00000002057,ENSMUSG00000002983,ENSMUSG00000003032,ENSMUSG00000003282,ENSMUSG00000003545,ENSMUSG00000004043,ENSMUSG00000004359,ENSMUSG00000004661,ENSMUSG00000005148,ENSMUSG00000005677,ENSMUSG00000005917,ENSMUSG00000008496,ENSMUSG00000012350,ENSMUSG00000012520,ENSMUSG00000014030,ENSMUSG00000015053,…
1	!	3.77e-08	2027	2501	355	0.142	0.175	GO:0044459	CC	1	plasma membrane part	1	ENSMUSG00000000244,ENSMUSG00000000409,ENSMUSG00000000766,ENSMUSG00000000817,ENSMUSG00000001095,ENSMUSG00000001225,ENSMUSG00000001249,ENSMUSG00000002699,ENSMUSG00000003882,ENSMUSG00000004609,ENSMUSG00000004655,ENSMUSG00000005947,ENSMUSG00000005952,ENSMUSG00000005958,ENSMUSG00000006345,ENSMUSG00000006445,ENSMUSG00000006574,ENSMUSG00000006649,ENSMUSG00000008590,ENSMUSG00000009545,ENSMUSG00000009900,…
1	!	9.42e-08	4238	2501	664	0.265	0.157	GO:0044425	CC	1	membrane part	1	ENSMUSG00000000244,ENSMUSG00000000409,ENSMUSG00000000766,ENSMUSG00000000817,ENSMUSG00000001095,ENSMUSG00000001155,ENSMUSG00000001225,ENSMUSG00000001249,ENSMUSG00000002279,ENSMUSG00000002699,ENSMUSG00000003341,ENSMUSG00000003882,ENSMUSG00000004446,ENSMUSG00000004609,ENSMUSG00000004654,ENSMUSG00000004655,ENSMUSG00000005947,ENSMUSG00000005952,ENSMUSG00000005958,ENSMUSG00000006345,ENSMUSG00000006445,…
1	!	1.33e-07	5169	2501	789	0.315	0.153	GO:0023052	BP	1	signaling	1	ENSMUSG00000000093,ENSMUSG00000000126,ENSMUSG00000000244,ENSMUSG00000000409,ENSMUSG00000000766,ENSMUSG00000000817,ENSMUSG00000001870,ENSMUSG00000002699,ENSMUSG00000002983,ENSMUSG00000003032,ENSMUSG00000003436,ENSMUSG00000003882,ENSMUSG00000003934,ENSMUSG00000004043,ENSMUSG00000004296,ENSMUSG00000004371,ENSMUSG00000004446,ENSMUSG00000004654,ENSMUSG00000004655,ENSMUSG00000005057,ENSMUSG00000005268,…
1	!	1.9e-07	16520	2712	2281	0.841	0.138	TF:M07429_0	tf	1	Factor: SMAD3; motif: CAGACAS; match class: 0	1	ENSMUSG00000000093,ENSMUSG00000000126,ENSMUSG00000000159,ENSMUSG00000000184,ENSMUSG00000000244,ENSMUSG00000000247,ENSMUSG00000000320,ENSMUSG00000000359,ENSMUSG00000000409,ENSMUSG00000000435,ENSMUSG00000000690,ENSMUSG00000000706,ENSMUSG00000000731,ENSMUSG00000000766,ENSMUSG00000000792,ENSMUSG00000000794,ENSMUSG00000000817,ENSMUSG00000000884,ENSMUSG00000001021,ENSMUSG00000001027,ENSMUSG00000001095,…
1	!	2.43e-07	5206	2501	792	0.317	0.152	GO:0007154	BP	1	cell communication	1	ENSMUSG00000000093,ENSMUSG00000000126,ENSMUSG00000000244,ENSMUSG00000000409,ENSMUSG00000000766,ENSMUSG00000000817,ENSMUSG00000001870,ENSMUSG00000002699,ENSMUSG00000002983,ENSMUSG00000003032,ENSMUSG00000003436,ENSMUSG00000003882,ENSMUSG00000003934,ENSMUSG00000004043,ENSMUSG00000004296,ENSMUSG00000004371,ENSMUSG00000004446,ENSMUSG00000004654,ENSMUSG00000004655,ENSMUSG00000005057,ENSMUSG00000005268,…
1	!	9.02e-07	4747	2501	726	0.29	0.153	GO:0007165	BP	1	signal transduction	1	ENSMUSG00000000093,ENSMUSG00000000126,ENSMUSG00000000244,ENSMUSG00000000409,ENSMUSG00000000766,ENSMUSG00000000817,ENSMUSG00000001870,ENSMUSG00000002699,ENSMUSG00000002983,ENSMUSG00000003032,ENSMUSG00000003436,ENSMUSG00000003882,ENSMUSG00000003934,ENSMUSG00000004043,ENSMUSG00000004296,ENSMUSG00000004371,ENSMUSG00000004446,ENSMUSG00000004654,ENSMUSG00000005057,ENSMUSG00000005268,ENSMUSG00000005373,…
1	!	1.44e-06	429	2501	100	0.04	0.233	GO:0006954	BP	1	inflammatory response	1	ENSMUSG00000002983,ENSMUSG00000004043,ENSMUSG00000004296,ENSMUSG00000005952,ENSMUSG00000006344,ENSMUSG00000006345,ENSMUSG00000006445,ENSMUSG00000010751,ENSMUSG00000015316,ENSMUSG00000015619,ENSMUSG00000016024,ENSMUSG00000017652,ENSMUSG00000019122,ENSMUSG00000019429,ENSMUSG00000019768,ENSMUSG00000019850,ENSMUSG00000020826,ENSMUSG00000020872,ENSMUSG00000021322,ENSMUSG00000021457,ENSMUSG00000021994,…
1	!	1.95e-06	7017	2501	1024	0.409	0.146	GO:0050896	BP	1	response to stimulus	1	ENSMUSG00000000093,ENSMUSG00000000126,ENSMUSG00000000184,ENSMUSG00000000244,ENSMUSG00000000247,ENSMUSG00000000320,ENSMUSG00000000409,ENSMUSG00000000731,ENSMUSG00000000766,ENSMUSG00000000817,ENSMUSG00000001225,ENSMUSG00000001249,ENSMUSG00000001444,ENSMUSG00000001497,ENSMUSG00000001870,ENSMUSG00000002699,ENSMUSG00000002870,ENSMUSG00000002983,ENSMUSG00000003032,ENSMUSG00000003436,ENSMUSG00000003545,…
1	!	2.5e-06	98	2501	36	0.014	0.367	GO:0008528	MF	1	G-protein coupled peptide receptor activity	1	ENSMUSG00000000766,ENSMUSG00000021070,ENSMUSG00000024553,ENSMUSG00000025127,ENSMUSG00000025804,ENSMUSG00000025905,ENSMUSG00000026180,ENSMUSG00000026271,ENSMUSG00000026432,ENSMUSG00000027568,ENSMUSG00000029193,ENSMUSG00000029530,ENSMUSG00000030043,ENSMUSG00000032937,ENSMUSG00000035448,ENSMUSG00000037944,ENSMUSG00000038745,ENSMUSG00000043659,ENSMUSG00000043953,ENSMUSG00000044534,ENSMUSG00000047904,…
1	!	4.54e-06	879	2501	172	0.069	0.196	GO:0009887	BP	1	animal organ morphogenesis	1	ENSMUSG00000000093,ENSMUSG00000000126,ENSMUSG00000000435,ENSMUSG00000000690,ENSMUSG00000000817,ENSMUSG00000001249,ENSMUSG00000001497,ENSMUSG00000001655,ENSMUSG00000001656,ENSMUSG00000001657,ENSMUSG00000003282,ENSMUSG00000004043,ENSMUSG00000004655,ENSMUSG00000005917,ENSMUSG00000006445,ENSMUSG00000006538,ENSMUSG00000006948,ENSMUSG00000008136,ENSMUSG00000008999,ENSMUSG00000009900,ENSMUSG00000012819,…
1	!	5.28e-06	5811	2501	862	0.345	0.148	GO:0051716	BP	1	cellular response to stimulus	1	ENSMUSG00000000093,ENSMUSG00000000126,ENSMUSG00000000184,ENSMUSG00000000244,ENSMUSG00000000409,ENSMUSG00000000766,ENSMUSG00000000817,ENSMUSG00000001225,ENSMUSG00000001444,ENSMUSG00000001497,ENSMUSG00000001870,ENSMUSG00000002699,ENSMUSG00000002870,ENSMUSG00000002983,ENSMUSG00000003032,ENSMUSG00000003436,ENSMUSG00000003545,ENSMUSG00000003882,ENSMUSG00000003934,ENSMUSG00000004043,ENSMUSG00000004296,…
1	!	6.23e-06	559	2501	120	0.048	0.215	GO:0001816	BP	1	cytokine production	1	ENSMUSG00000000706,ENSMUSG00000000731,ENSMUSG00000002699,ENSMUSG00000002983,ENSMUSG00000003032,ENSMUSG00000003505,ENSMUSG00000004043,ENSMUSG00000004296,ENSMUSG00000006389,ENSMUSG00000006445,ENSMUSG00000009900,ENSMUSG00000015314,ENSMUSG00000015316,ENSMUSG00000015568,ENSMUSG00000015619,ENSMUSG00000016024,ENSMUSG00000016494,ENSMUSG00000016496,ENSMUSG00000017146,ENSMUSG00000017652,ENSMUSG00000018899,…
1	!	6.47e-06	101	2501	36	0.014	0.356	GO:0001653	MF	1	peptide receptor activity	1	ENSMUSG00000000766,ENSMUSG00000021070,ENSMUSG00000024553,ENSMUSG00000025127,ENSMUSG00000025804,ENSMUSG00000025905,ENSMUSG00000026180,ENSMUSG00000026271,ENSMUSG00000026432,ENSMUSG00000027568,ENSMUSG00000029193,ENSMUSG00000029530,ENSMUSG00000030043,ENSMUSG00000032937,ENSMUSG00000035448,ENSMUSG00000037944,ENSMUSG00000038745,ENSMUSG00000043659,ENSMUSG00000043953,ENSMUSG00000044534,ENSMUSG00000047904,…
1	!	7.2e-06	273	1051	69	0.066	0.253	KEGG:04060	keg	1	Cytokine-cytokine receptor interaction	1	ENSMUSG00000000817,ENSMUSG00000003882,ENSMUSG00000004296,ENSMUSG00000004371,ENSMUSG00000005268,ENSMUSG00000006389,ENSMUSG00000008999,ENSMUSG00000014599,ENSMUSG00000017652,ENSMUSG00000019122,ENSMUSG00000020007,ENSMUSG00000020357,ENSMUSG00000022015,ENSMUSG00000022074,ENSMUSG00000022146,ENSMUSG00000024401,ENSMUSG00000025383,ENSMUSG00000025804,ENSMUSG00000026070,ENSMUSG00000026072,ENSMUSG00000026180,…
1	!	9.16e-06	64	2501	27	0.011	0.422	GO:0004896	MF	1	cytokine receptor activity	1	ENSMUSG00000005268,ENSMUSG00000006389,ENSMUSG00000020007,ENSMUSG00000023274,ENSMUSG00000025804,ENSMUSG00000026069,ENSMUSG00000026070,ENSMUSG00000026072,ENSMUSG00000026180,ENSMUSG00000026271,ENSMUSG00000026770,ENSMUSG00000027947,ENSMUSG00000029530,ENSMUSG00000030745,ENSMUSG00000032089,ENSMUSG00000035448,ENSMUSG00000037944,ENSMUSG00000040717,ENSMUSG00000043088,ENSMUSG00000043953,ENSMUSG00000044534,…
1	!	1.38e-05	828	2501	162	0.065	0.196	GO:0043565	MF	1	sequence-specific DNA binding	1	ENSMUSG00000000093,ENSMUSG00000000247,ENSMUSG00000000435,ENSMUSG00000000731,ENSMUSG00000001497,ENSMUSG00000001656,ENSMUSG00000002057,ENSMUSG00000002870,ENSMUSG00000002983,ENSMUSG00000003032,ENSMUSG00000003282,ENSMUSG00000003545,ENSMUSG00000004043,ENSMUSG00000004359,ENSMUSG00000004661,ENSMUSG00000005148,ENSMUSG00000005373,ENSMUSG00000005677,ENSMUSG00000005917,ENSMUSG00000006360,ENSMUSG00000007946,…
1	!	1.39e-05	500	2501	109	0.044	0.218	GO:0001817	BP	1	regulation of cytokine production	1	ENSMUSG00000000706,ENSMUSG00000002983,ENSMUSG00000003032,ENSMUSG00000003505,ENSMUSG00000004043,ENSMUSG00000004296,ENSMUSG00000006389,ENSMUSG00000006445,ENSMUSG00000009900,ENSMUSG00000015314,ENSMUSG00000015316,ENSMUSG00000015568,ENSMUSG00000015619,ENSMUSG00000016024,ENSMUSG00000016494,ENSMUSG00000016496,ENSMUSG00000017146,ENSMUSG00000017652,ENSMUSG00000018899,ENSMUSG00000019429,ENSMUSG00000019850,…
1	!	2.1e-05	6582	2712	988	0.364	0.15	TF:M01591_0	tf	1	Factor: Tal-1; motif: CTTCCTTMTCTSY; match class: 0	1	ENSMUSG00000000126,ENSMUSG00000000244,ENSMUSG00000000247,ENSMUSG00000000690,ENSMUSG00000000706,ENSMUSG00000000884,ENSMUSG00000001021,ENSMUSG00000001095,ENSMUSG00000001333,ENSMUSG00000001494,ENSMUSG00000001497,ENSMUSG00000001517,ENSMUSG00000001655,ENSMUSG00000001661,ENSMUSG00000001870,ENSMUSG00000002057,ENSMUSG00000002076,ENSMUSG00000002279,ENSMUSG00000003282,ENSMUSG00000003436,ENSMUSG00000003477,…
1	!	2.62e-05	1544	2501	269	0.108	0.174	GO:0008283	BP	1	cell proliferation	1	ENSMUSG00000000093,ENSMUSG00000000126,ENSMUSG00000000184,ENSMUSG00000000244,ENSMUSG00000000320,ENSMUSG00000000409,ENSMUSG00000000706,ENSMUSG00000001249,ENSMUSG00000002057,ENSMUSG00000002565,ENSMUSG00000003032,ENSMUSG00000003282,ENSMUSG00000003882,ENSMUSG00000004043,ENSMUSG00000004296,ENSMUSG00000004371,ENSMUSG00000004446,ENSMUSG00000004654,ENSMUSG00000004655,ENSMUSG00000004891,ENSMUSG00000005373,…
1	!	3.86e-05	2798	2501	447	0.179	0.16	GO:0048513	BP	1	animal organ development	1	ENSMUSG00000000093,ENSMUSG00000000126,ENSMUSG00000000247,ENSMUSG00000000320,ENSMUSG00000000409,ENSMUSG00000000435,ENSMUSG00000000690,ENSMUSG00000000731,ENSMUSG00000000817,ENSMUSG00000001249,ENSMUSG00000001444,ENSMUSG00000001497,ENSMUSG00000001655,ENSMUSG00000001656,ENSMUSG00000001657,ENSMUSG00000001870,ENSMUSG00000002057,ENSMUSG00000002565,ENSMUSG00000002870,ENSMUSG00000002983,ENSMUSG00000003032,…
1	!	8.47e-05	254	2501	64	0.026	0.252	GO:0001077	MF	1	transcriptional activator activity, RNA polymerase II core promoter proximal region sequence-specific binding	1	ENSMUSG00000000247,ENSMUSG00000001655,ENSMUSG00000001656,ENSMUSG00000002983,ENSMUSG00000003032,ENSMUSG00000003282,ENSMUSG00000003545,ENSMUSG00000004043,ENSMUSG00000004359,ENSMUSG00000004661,ENSMUSG00000005148,ENSMUSG00000005917,ENSMUSG00000008496,ENSMUSG00000012350,ENSMUSG00000012520,ENSMUSG00000014030,ENSMUSG00000015053,ENSMUSG00000015619,ENSMUSG00000017861,ENSMUSG00000018899,ENSMUSG00000018973,…
1	!	0.000109	97	2501	33	0.013	0.34	GO:0005267	MF	1	potassium channel activity	1	ENSMUSG00000000794,ENSMUSG00000001249,ENSMUSG00000004655,ENSMUSG00000009246,ENSMUSG00000009545,ENSMUSG00000022342,ENSMUSG00000023243,ENSMUSG00000025221,ENSMUSG00000026114,ENSMUSG00000028033,ENSMUSG00000030247,ENSMUSG00000031789,ENSMUSG00000032034,ENSMUSG00000034402,ENSMUSG00000035165,ENSMUSG00000035355,ENSMUSG00000037610,ENSMUSG00000038201,ENSMUSG00000039639,ENSMUSG00000040164,ENSMUSG00000041248,…
1	!	0.000185	287	2501	69	0.028	0.24	GO:0048562	BP	1	embryonic organ morphogenesis	1	ENSMUSG00000000093,ENSMUSG00000000126,ENSMUSG00000000435,ENSMUSG00000000690,ENSMUSG00000001249,ENSMUSG00000001656,ENSMUSG00000005917,ENSMUSG00000006445,ENSMUSG00000006538,ENSMUSG00000008999,ENSMUSG00000009900,ENSMUSG00000012819,ENSMUSG00000014030,ENSMUSG00000015053,ENSMUSG00000015619,ENSMUSG00000018486,ENSMUSG00000018604,ENSMUSG00000018973,ENSMUSG00000020679,ENSMUSG00000020950,ENSMUSG00000021944,…
1	!	0.000198	221	2501	57	0.023	0.258	GO:0022836	MF	1	gated channel activity	1	ENSMUSG00000000766,ENSMUSG00000000794,ENSMUSG00000001249,ENSMUSG00000004655,ENSMUSG00000005952,ENSMUSG00000008590,ENSMUSG00000009246,ENSMUSG00000009545,ENSMUSG00000014609,ENSMUSG00000018595,ENSMUSG00000020722,ENSMUSG00000022041,ENSMUSG00000022342,ENSMUSG00000023243,ENSMUSG00000025221,ENSMUSG00000026114,ENSMUSG00000027107,ENSMUSG00000027577,ENSMUSG00000028033,ENSMUSG00000028255,ENSMUSG00000029205,…
1	!	0.000219	1402	2712	249	0.092	0.178	TF:M01591_1	tf	1	Factor: Tal-1; motif: CTTCCTTMTCTSY; match class: 1	1	ENSMUSG00000000244,ENSMUSG00000000690,ENSMUSG00000001021,ENSMUSG00000002057,ENSMUSG00000002076,ENSMUSG00000003505,ENSMUSG00000004231,ENSMUSG00000005373,ENSMUSG00000005677,ENSMUSG00000006204,ENSMUSG00000006360,ENSMUSG00000006649,ENSMUSG00000006784,ENSMUSG00000006948,ENSMUSG00000007946,ENSMUSG00000008496,ENSMUSG00000010751,ENSMUSG00000012123,ENSMUSG00000013668,ENSMUSG00000013846,ENSMUSG00000014776,…
1	!	0.000247	1234	2501	218	0.087	0.177	GO:0042127	BP	1	regulation of cell proliferation	1	ENSMUSG00000000093,ENSMUSG00000000126,ENSMUSG00000000184,ENSMUSG00000000244,ENSMUSG00000000320,ENSMUSG00000000409,ENSMUSG00000000706,ENSMUSG00000001249,ENSMUSG00000002565,ENSMUSG00000003032,ENSMUSG00000003282,ENSMUSG00000004043,ENSMUSG00000004296,ENSMUSG00000004371,ENSMUSG00000004446,ENSMUSG00000004654,ENSMUSG00000004655,ENSMUSG00000004891,ENSMUSG00000005373,ENSMUSG00000006389,ENSMUSG00000006538,…
1	!	0.000299	251	2501	62	0.025	0.247	GO:0090596	BP	1	sensory organ morphogenesis	1	ENSMUSG00000000093,ENSMUSG00000000817,ENSMUSG00000001249,ENSMUSG00000001655,ENSMUSG00000004655,ENSMUSG00000005917,ENSMUSG00000006445,ENSMUSG00000006538,ENSMUSG00000008999,ENSMUSG00000009900,ENSMUSG00000012819,ENSMUSG00000015053,ENSMUSG00000015619,ENSMUSG00000020950,ENSMUSG00000021239,ENSMUSG00000021994,ENSMUSG00000024041,ENSMUSG00000024134,ENSMUSG00000024497,ENSMUSG00000025900,ENSMUSG00000026114,…
1	!	0.000302	431	2501	93	0.037	0.216	GO:0031347	BP	1	regulation of defense response	1	ENSMUSG00000000244,ENSMUSG00000004043,ENSMUSG00000004296,ENSMUSG00000006345,ENSMUSG00000015314,ENSMUSG00000015619,ENSMUSG00000016024,ENSMUSG00000018899,ENSMUSG00000019429,ENSMUSG00000019768,ENSMUSG00000019850,ENSMUSG00000020707,ENSMUSG00000020826,ENSMUSG00000021322,ENSMUSG00000021356,ENSMUSG00000021457,ENSMUSG00000021994,ENSMUSG00000022015,ENSMUSG00000022181,ENSMUSG00000022383,ENSMUSG00000022534,…
1	!	0.000302	240	2501	60	0.024	0.25	GO:0005261	MF	1	cation channel activity	1	ENSMUSG00000000766,ENSMUSG00000000794,ENSMUSG00000001249,ENSMUSG00000004655,ENSMUSG00000005952,ENSMUSG00000008590,ENSMUSG00000009246,ENSMUSG00000009545,ENSMUSG00000014609,ENSMUSG00000020722,ENSMUSG00000022041,ENSMUSG00000022342,ENSMUSG00000023243,ENSMUSG00000025221,ENSMUSG00000025993,ENSMUSG00000026114,ENSMUSG00000027107,ENSMUSG00000027577,ENSMUSG00000028033,ENSMUSG00000029205,ENSMUSG00000029503,…
1	!	0.000332	314	2501	73	0.029	0.232	GO:0022838	MF	1	substrate-specific channel activity	1	ENSMUSG00000000766,ENSMUSG00000000794,ENSMUSG00000001225,ENSMUSG00000001249,ENSMUSG00000004655,ENSMUSG00000005952,ENSMUSG00000008590,ENSMUSG00000009246,ENSMUSG00000009545,ENSMUSG00000014609,ENSMUSG00000018595,ENSMUSG00000020722,ENSMUSG00000022041,ENSMUSG00000022342,ENSMUSG00000023243,ENSMUSG00000025221,ENSMUSG00000025389,ENSMUSG00000025993,ENSMUSG00000026114,ENSMUSG00000027107,ENSMUSG00000027577,…
1	!	0.000332	1111	2501	199	0.08	0.179	GO:0006952	BP	1	defense response	1	ENSMUSG00000000244,ENSMUSG00000000409,ENSMUSG00000002983,ENSMUSG00000004043,ENSMUSG00000004296,ENSMUSG00000005952,ENSMUSG00000006056,ENSMUSG00000006344,ENSMUSG00000006345,ENSMUSG00000006445,ENSMUSG00000009350,ENSMUSG00000010751,ENSMUSG00000015314,ENSMUSG00000015316,ENSMUSG00000015619,ENSMUSG00000016024,ENSMUSG00000017652,ENSMUSG00000018819,ENSMUSG00000018899,ENSMUSG00000019122,ENSMUSG00000019429,…
1	!	0.000466	305	2501	71	0.028	0.233	GO:0005216	MF	1	ion channel activity	1	ENSMUSG00000000766,ENSMUSG00000000794,ENSMUSG00000001225,ENSMUSG00000001249,ENSMUSG00000004655,ENSMUSG00000005952,ENSMUSG00000008590,ENSMUSG00000009246,ENSMUSG00000009545,ENSMUSG00000014609,ENSMUSG00000018595,ENSMUSG00000020722,ENSMUSG00000022041,ENSMUSG00000022342,ENSMUSG00000023243,ENSMUSG00000025221,ENSMUSG00000025993,ENSMUSG00000026114,ENSMUSG00000027107,ENSMUSG00000027577,ENSMUSG00000028033,…
1	!	0.000479	340	2501	77	0.031	0.226	GO:0015267	MF	1	channel activity	1	ENSMUSG00000000766,ENSMUSG00000000794,ENSMUSG00000001225,ENSMUSG00000001249,ENSMUSG00000004655,ENSMUSG00000005952,ENSMUSG00000008590,ENSMUSG00000009246,ENSMUSG00000009545,ENSMUSG00000014609,ENSMUSG00000018595,ENSMUSG00000020722,ENSMUSG00000022041,ENSMUSG00000022342,ENSMUSG00000023243,ENSMUSG00000025221,ENSMUSG00000025389,ENSMUSG00000025993,ENSMUSG00000026114,ENSMUSG00000027107,ENSMUSG00000027577,…
1	!	0.000479	340	2501	77	0.031	0.226	GO:0022803	MF	1	passive transmembrane transporter activity	1	ENSMUSG00000000766,ENSMUSG00000000794,ENSMUSG00000001225,ENSMUSG00000001249,ENSMUSG00000004655,ENSMUSG00000005952,ENSMUSG00000008590,ENSMUSG00000009246,ENSMUSG00000009545,ENSMUSG00000014609,ENSMUSG00000018595,ENSMUSG00000020722,ENSMUSG00000022041,ENSMUSG00000022342,ENSMUSG00000023243,ENSMUSG00000025221,ENSMUSG00000025389,ENSMUSG00000025993,ENSMUSG00000026114,ENSMUSG00000027107,ENSMUSG00000027577,…
1	!	0.000849	327	2501	74	0.03	0.226	GO:0001819	BP	1	positive regulation of cytokine production	1	ENSMUSG00000004043,ENSMUSG00000004296,ENSMUSG00000009900,ENSMUSG00000015314,ENSMUSG00000015316,ENSMUSG00000015568,ENSMUSG00000015619,ENSMUSG00000016024,ENSMUSG00000016494,ENSMUSG00000016496,ENSMUSG00000017146,ENSMUSG00000017652,ENSMUSG00000018899,ENSMUSG00000019429,ENSMUSG00000020357,ENSMUSG00000020707,ENSMUSG00000021356,ENSMUSG00000021457,ENSMUSG00000021944,ENSMUSG00000021994,ENSMUSG00000024349,…
1	!	0.00106	19105	2712	2559	0.944	0.134	TF:M02262_0	tf	1	Factor: PPARgamma:RXR-alpha; motif: NTRGGNCARAGGKCA; match class: 0	1	ENSMUSG00000000093,ENSMUSG00000000126,ENSMUSG00000000159,ENSMUSG00000000184,ENSMUSG00000000244,ENSMUSG00000000247,ENSMUSG00000000320,ENSMUSG00000000359,ENSMUSG00000000409,ENSMUSG00000000435,ENSMUSG00000000486,ENSMUSG00000000690,ENSMUSG00000000706,ENSMUSG00000000731,ENSMUSG00000000766,ENSMUSG00000000792,ENSMUSG00000000794,ENSMUSG00000000817,ENSMUSG00000000884,ENSMUSG00000001021,ENSMUSG00000001027,…
1	!	0.00115	5463	2712	819	0.302	0.15	TF:M00763_1	tf	1	Factor: PPAR; motif: TGACCTTTGNCCY; match class: 1	1	ENSMUSG00000000159,ENSMUSG00000000247,ENSMUSG00000000731,ENSMUSG00000000792,ENSMUSG00000000884,ENSMUSG00000001021,ENSMUSG00000001027,ENSMUSG00000001155,ENSMUSG00000001249,ENSMUSG00000001403,ENSMUSG00000001494,ENSMUSG00000001672,ENSMUSG00000001918,ENSMUSG00000002227,ENSMUSG00000003032,ENSMUSG00000003341,ENSMUSG00000003477,ENSMUSG00000003505,ENSMUSG00000003934,ENSMUSG00000004043,ENSMUSG00000004296,…
1	!	0.00123	13305	2712	1851	0.683	0.139	TF:M01207_1	tf	1	Factor: c-Ets-2; motif: CTTCCTG; match class: 1	1	ENSMUSG00000000159,ENSMUSG00000000184,ENSMUSG00000000244,ENSMUSG00000000247,ENSMUSG00000000320,ENSMUSG00000000409,ENSMUSG00000000486,ENSMUSG00000000562,ENSMUSG00000000690,ENSMUSG00000000731,ENSMUSG00000000766,ENSMUSG00000000792,ENSMUSG00000000794,ENSMUSG00000000817,ENSMUSG00000001021,ENSMUSG00000001027,ENSMUSG00000001095,ENSMUSG00000001225,ENSMUSG00000001249,ENSMUSG00000001403,ENSMUSG00000001444,…
1	!	0.00123	13305	2712	1851	0.683	0.139	TF:M07252_1	tf	1	Factor: Elk-1; motif: CTTCCKG; match class: 1	1	ENSMUSG00000000159,ENSMUSG00000000184,ENSMUSG00000000244,ENSMUSG00000000247,ENSMUSG00000000320,ENSMUSG00000000409,ENSMUSG00000000486,ENSMUSG00000000562,ENSMUSG00000000690,ENSMUSG00000000731,ENSMUSG00000000766,ENSMUSG00000000792,ENSMUSG00000000794,ENSMUSG00000000817,ENSMUSG00000001021,ENSMUSG00000001027,ENSMUSG00000001095,ENSMUSG00000001225,ENSMUSG00000001249,ENSMUSG00000001403,ENSMUSG00000001444,…
1	!	0.00126	7997	2712	1160	0.428	0.145	TF:M00983_1	tf	1	Factor: MAF; motif: NGCTGAGTCAN; match class: 1	1	ENSMUSG00000000126,ENSMUSG00000000435,ENSMUSG00000000706,ENSMUSG00000000794,ENSMUSG00000000817,ENSMUSG00000000884,ENSMUSG00000001095,ENSMUSG00000001403,ENSMUSG00000001588,ENSMUSG00000001665,ENSMUSG00000001918,ENSMUSG00000002983,ENSMUSG00000003032,ENSMUSG00000003341,ENSMUSG00000003505,ENSMUSG00000003882,ENSMUSG00000003934,ENSMUSG00000004043,ENSMUSG00000004359,ENSMUSG00000004371,ENSMUSG00000004540,…
1	!	0.00132	354	522	81	0.155	0.229	HP:0011122	hp	1	Abnormality of skin physiology	1	ENSMUSG00000000731,ENSMUSG00000002279,ENSMUSG00000003882,ENSMUSG00000006389,ENSMUSG00000012819,ENSMUSG00000015619,ENSMUSG00000019768,ENSMUSG00000019850,ENSMUSG00000020758,ENSMUSG00000020892,ENSMUSG00000021565,ENSMUSG00000022146,ENSMUSG00000022510,ENSMUSG00000022534,ENSMUSG00000024349,ENSMUSG00000024459,ENSMUSG00000024770,ENSMUSG00000025279,ENSMUSG00000025804,ENSMUSG00000026117,ENSMUSG00000026271,…
1	!	0.00164	27	1051	13	0.012	0.481	KEGG:04744	keg	1	Phototransduction	1	ENSMUSG00000020599,ENSMUSG00000020890,ENSMUSG00000023979,ENSMUSG00000025386,ENSMUSG00000029491,ENSMUSG00000029663,ENSMUSG00000030324,ENSMUSG00000031450,ENSMUSG00000031789,ENSMUSG00000034452,ENSMUSG00000056055,ENSMUSG00000063130,ENSMUSG00000074003
1	!	0.00165	380	2501	82	0.033	0.216	GO:0000982	MF	1	transcription factor activity, RNA polymerase II core promoter proximal region sequence-specific binding	1	ENSMUSG00000000093,ENSMUSG00000000247,ENSMUSG00000001655,ENSMUSG00000001656,ENSMUSG00000002983,ENSMUSG00000003032,ENSMUSG00000003282,ENSMUSG00000003545,ENSMUSG00000004043,ENSMUSG00000004359,ENSMUSG00000004661,ENSMUSG00000005148,ENSMUSG00000005373,ENSMUSG00000005917,ENSMUSG00000008496,ENSMUSG00000009248,ENSMUSG00000012350,ENSMUSG00000012520,ENSMUSG00000014030,ENSMUSG00000015053,ENSMUSG00000015619,…
1	!	0.00169	540	2501	108	0.043	0.2	GO:0032101	BP	1	regulation of response to external stimulus	1	ENSMUSG00000000244,ENSMUSG00000000320,ENSMUSG00000003032,ENSMUSG00000004043,ENSMUSG00000004296,ENSMUSG00000006345,ENSMUSG00000009900,ENSMUSG00000014599,ENSMUSG00000015316,ENSMUSG00000015619,ENSMUSG00000016024,ENSMUSG00000016494,ENSMUSG00000017446,ENSMUSG00000019429,ENSMUSG00000019768,ENSMUSG00000019850,ENSMUSG00000020826,ENSMUSG00000021322,ENSMUSG00000021457,ENSMUSG00000021647,ENSMUSG00000021702,…
1	!	0.00208	35	1051	15	0.014	0.429	KEGG:05340	keg	1	Primary immunodeficiency	1	ENSMUSG00000000409,ENSMUSG00000000731,ENSMUSG00000003882,ENSMUSG00000017652,ENSMUSG00000023274,ENSMUSG00000026009,ENSMUSG00000026117,ENSMUSG00000026395,ENSMUSG00000029591,ENSMUSG00000030724,ENSMUSG00000032093,ENSMUSG00000037321,ENSMUSG00000053977,ENSMUSG00000061311,ENSMUSG00000068105
1	!	0.00225	581	2501	114	0.046	0.196	GO:0001012	MF	1	RNA polymerase II regulatory region DNA binding	1	ENSMUSG00000000093,ENSMUSG00000000247,ENSMUSG00000000435,ENSMUSG00000000731,ENSMUSG00000001497,ENSMUSG00000001656,ENSMUSG00000002983,ENSMUSG00000003282,ENSMUSG00000003545,ENSMUSG00000004043,ENSMUSG00000004359,ENSMUSG00000004661,ENSMUSG00000005148,ENSMUSG00000005373,ENSMUSG00000005677,ENSMUSG00000005917,ENSMUSG00000007946,ENSMUSG00000008496,ENSMUSG00000009248,ENSMUSG00000012350,ENSMUSG00000012520,…
1	!	0.00225	581	2501	114	0.046	0.196	GO:0000977	MF	1	RNA polymerase II regulatory region sequence-specific DNA binding	1	ENSMUSG00000000093,ENSMUSG00000000247,ENSMUSG00000000435,ENSMUSG00000000731,ENSMUSG00000001497,ENSMUSG00000001656,ENSMUSG00000002983,ENSMUSG00000003282,ENSMUSG00000003545,ENSMUSG00000004043,ENSMUSG00000004359,ENSMUSG00000004661,ENSMUSG00000005148,ENSMUSG00000005373,ENSMUSG00000005677,ENSMUSG00000005917,ENSMUSG00000007946,ENSMUSG00000008496,ENSMUSG00000009248,ENSMUSG00000012350,ENSMUSG00000012520,…
1	!	0.00235	11319	2712	1593	0.587	0.141	TF:M07368_0	tf	1	Factor: Smad4; motif: NCAGACAN; match class: 0	1	ENSMUSG00000000126,ENSMUSG00000000159,ENSMUSG00000000184,ENSMUSG00000000244,ENSMUSG00000000247,ENSMUSG00000000320,ENSMUSG00000000409,ENSMUSG00000000435,ENSMUSG00000000706,ENSMUSG00000000817,ENSMUSG00000000884,ENSMUSG00000001027,ENSMUSG00000001095,ENSMUSG00000001225,ENSMUSG00000001249,ENSMUSG00000001444,ENSMUSG00000001494,ENSMUSG00000001497,ENSMUSG00000001517,ENSMUSG00000001588,ENSMUSG00000001655,…
1	!	0.00312	668	2501	127	0.051	0.19	GO:1990837	MF	1	sequence-specific double-stranded DNA binding	1	ENSMUSG00000000093,ENSMUSG00000000247,ENSMUSG00000000435,ENSMUSG00000000731,ENSMUSG00000001497,ENSMUSG00000001656,ENSMUSG00000002870,ENSMUSG00000002983,ENSMUSG00000003032,ENSMUSG00000003282,ENSMUSG00000003545,ENSMUSG00000004043,ENSMUSG00000004359,ENSMUSG00000004661,ENSMUSG00000005148,ENSMUSG00000005373,ENSMUSG00000005677,ENSMUSG00000005917,ENSMUSG00000006360,ENSMUSG00000007946,ENSMUSG00000008496,…
1	!	0.00312	314	2501	70	0.028	0.223	GO:0019221	BP	1	cytokine-mediated signaling pathway	1	ENSMUSG00000000409,ENSMUSG00000003882,ENSMUSG00000004043,ENSMUSG00000004296,ENSMUSG00000005057,ENSMUSG00000012889,ENSMUSG00000014599,ENSMUSG00000014776,ENSMUSG00000018899,ENSMUSG00000019122,ENSMUSG00000020007,ENSMUSG00000020696,ENSMUSG00000021457,ENSMUSG00000021994,ENSMUSG00000022015,ENSMUSG00000023043,ENSMUSG00000023274,ENSMUSG00000023992,ENSMUSG00000024401,ENSMUSG00000025383,ENSMUSG00000025804,…
1	!	0.00361	12671	2712	1765	0.651	0.139	TF:M01888_0	tf	1	Factor: Smad3; motif: NGNCAGACASNNN; match class: 0	1	ENSMUSG00000000093,ENSMUSG00000000247,ENSMUSG00000000320,ENSMUSG00000000359,ENSMUSG00000000409,ENSMUSG00000000435,ENSMUSG00000000562,ENSMUSG00000000690,ENSMUSG00000000731,ENSMUSG00000000766,ENSMUSG00000000817,ENSMUSG00000000884,ENSMUSG00000001021,ENSMUSG00000001027,ENSMUSG00000001095,ENSMUSG00000001155,ENSMUSG00000001225,ENSMUSG00000001249,ENSMUSG00000001444,ENSMUSG00000001494,ENSMUSG00000001497,…
1	!	0.00363	126	2501	36	0.014	0.286	GO:0015079	MF	1	potassium ion transmembrane transporter activity	1	ENSMUSG00000000794,ENSMUSG00000001249,ENSMUSG00000004655,ENSMUSG00000009246,ENSMUSG00000009545,ENSMUSG00000017756,ENSMUSG00000022342,ENSMUSG00000023243,ENSMUSG00000025221,ENSMUSG00000026062,ENSMUSG00000026114,ENSMUSG00000028033,ENSMUSG00000030247,ENSMUSG00000031789,ENSMUSG00000032034,ENSMUSG00000034402,ENSMUSG00000034452,ENSMUSG00000035165,ENSMUSG00000035355,ENSMUSG00000037610,ENSMUSG00000038201,…
1	!	0.00365	973	2501	173	0.069	0.178	GO:0045944	BP	1	positive regulation of transcription from RNA polymerase II promoter	1	ENSMUSG00000000247,ENSMUSG00000000435,ENSMUSG00000000731,ENSMUSG00000001497,ENSMUSG00000001655,ENSMUSG00000001656,ENSMUSG00000002057,ENSMUSG00000002983,ENSMUSG00000003032,ENSMUSG00000003282,ENSMUSG00000003545,ENSMUSG00000004043,ENSMUSG00000004359,ENSMUSG00000004371,ENSMUSG00000004661,ENSMUSG00000005148,ENSMUSG00000005373,ENSMUSG00000005677,ENSMUSG00000005917,ENSMUSG00000006538,ENSMUSG00000007946,…
1	!	0.00369	168	2501	44	0.018	0.262	GO:1903708	BP	1	positive regulation of hemopoiesis	1	ENSMUSG00000000409,ENSMUSG00000002565,ENSMUSG00000003882,ENSMUSG00000004043,ENSMUSG00000004296,ENSMUSG00000006538,ENSMUSG00000014599,ENSMUSG00000015053,ENSMUSG00000015619,ENSMUSG00000018899,ENSMUSG00000020689,ENSMUSG00000021457,ENSMUSG00000022015,ENSMUSG00000022831,ENSMUSG00000023274,ENSMUSG00000024401,ENSMUSG00000025383,ENSMUSG00000025804,ENSMUSG00000026117,ENSMUSG00000026288,ENSMUSG00000026700,…
1	!	0.00373	15756	2712	2154	0.794	0.137	TF:M07284_1	tf	1	Factor: Erg; motif: MCAGGAAA; match class: 1	1	ENSMUSG00000000093,ENSMUSG00000000159,ENSMUSG00000000184,ENSMUSG00000000244,ENSMUSG00000000247,ENSMUSG00000000320,ENSMUSG00000000359,ENSMUSG00000000409,ENSMUSG00000000435,ENSMUSG00000000562,ENSMUSG00000000690,ENSMUSG00000000706,ENSMUSG00000000731,ENSMUSG00000000766,ENSMUSG00000000792,ENSMUSG00000000794,ENSMUSG00000000817,ENSMUSG00000000884,ENSMUSG00000001021,ENSMUSG00000001027,ENSMUSG00000001095,…
1	!	0.00395	2314	2501	365	0.146	0.158	GO:0051239	BP	1	regulation of multicellular organismal process	1	ENSMUSG00000000093,ENSMUSG00000000126,ENSMUSG00000000320,ENSMUSG00000000409,ENSMUSG00000000435,ENSMUSG00000000706,ENSMUSG00000000766,ENSMUSG00000000817,ENSMUSG00000001249,ENSMUSG00000001444,ENSMUSG00000001497,ENSMUSG00000001656,ENSMUSG00000002057,ENSMUSG00000002565,ENSMUSG00000002983,ENSMUSG00000003032,ENSMUSG00000003282,ENSMUSG00000003436,ENSMUSG00000003505,ENSMUSG00000003882,ENSMUSG00000003934,…
1	!	0.00488	3037	2501	464	0.186	0.153	GO:0042221	BP	1	response to chemical	1	ENSMUSG00000000247,ENSMUSG00000000409,ENSMUSG00000000766,ENSMUSG00000001225,ENSMUSG00000001249,ENSMUSG00000001444,ENSMUSG00000001497,ENSMUSG00000001870,ENSMUSG00000002870,ENSMUSG00000002983,ENSMUSG00000003032,ENSMUSG00000003545,ENSMUSG00000003882,ENSMUSG00000003934,ENSMUSG00000004043,ENSMUSG00000004296,ENSMUSG00000004654,ENSMUSG00000004655,ENSMUSG00000005057,ENSMUSG00000005148,ENSMUSG00000005373,…
1	!	0.00523	779	2501	143	0.057	0.184	GO:0001067	MF	1	regulatory region nucleic acid binding	1	ENSMUSG00000000093,ENSMUSG00000000247,ENSMUSG00000000435,ENSMUSG00000000731,ENSMUSG00000001444,ENSMUSG00000001497,ENSMUSG00000001656,ENSMUSG00000002983,ENSMUSG00000003032,ENSMUSG00000003282,ENSMUSG00000003545,ENSMUSG00000004043,ENSMUSG00000004359,ENSMUSG00000004661,ENSMUSG00000005148,ENSMUSG00000005373,ENSMUSG00000005677,ENSMUSG00000005917,ENSMUSG00000007946,ENSMUSG00000008496,ENSMUSG00000009248,…
1	!	0.00523	779	2501	143	0.057	0.184	GO:0044212	MF	1	transcription regulatory region DNA binding	1	ENSMUSG00000000093,ENSMUSG00000000247,ENSMUSG00000000435,ENSMUSG00000000731,ENSMUSG00000001444,ENSMUSG00000001497,ENSMUSG00000001656,ENSMUSG00000002983,ENSMUSG00000003032,ENSMUSG00000003282,ENSMUSG00000003545,ENSMUSG00000004043,ENSMUSG00000004359,ENSMUSG00000004661,ENSMUSG00000005148,ENSMUSG00000005373,ENSMUSG00000005677,ENSMUSG00000005917,ENSMUSG00000007946,ENSMUSG00000008496,ENSMUSG00000009248,…
1	!	0.00523	779	2501	143	0.057	0.184	GO:0000975	MF	1	regulatory region DNA binding	1	ENSMUSG00000000093,ENSMUSG00000000247,ENSMUSG00000000435,ENSMUSG00000000731,ENSMUSG00000001444,ENSMUSG00000001497,ENSMUSG00000001656,ENSMUSG00000002983,ENSMUSG00000003032,ENSMUSG00000003282,ENSMUSG00000003545,ENSMUSG00000004043,ENSMUSG00000004359,ENSMUSG00000004661,ENSMUSG00000005148,ENSMUSG00000005373,ENSMUSG00000005677,ENSMUSG00000005917,ENSMUSG00000007946,ENSMUSG00000008496,ENSMUSG00000009248,…
1	!	0.00528	10381	2712	1467	0.541	0.141	TF:M01860_0	tf	1	Factor: AP-4; motif: NCAGCTGYNGNCN; match class: 0	1	ENSMUSG00000000093,ENSMUSG00000000126,ENSMUSG00000000159,ENSMUSG00000000244,ENSMUSG00000000359,ENSMUSG00000000435,ENSMUSG00000000486,ENSMUSG00000000562,ENSMUSG00000000706,ENSMUSG00000000731,ENSMUSG00000000766,ENSMUSG00000000792,ENSMUSG00000000794,ENSMUSG00000000817,ENSMUSG00000001027,ENSMUSG00000001095,ENSMUSG00000001155,ENSMUSG00000001249,ENSMUSG00000001333,ENSMUSG00000001403,ENSMUSG00000001444,…
1	!	0.00559	643	2501	122	0.049	0.19	GO:0000976	MF	1	transcription regulatory region sequence-specific DNA binding	1	ENSMUSG00000000093,ENSMUSG00000000247,ENSMUSG00000000435,ENSMUSG00000000731,ENSMUSG00000001497,ENSMUSG00000001656,ENSMUSG00000002983,ENSMUSG00000003032,ENSMUSG00000003282,ENSMUSG00000003545,ENSMUSG00000004043,ENSMUSG00000004359,ENSMUSG00000004661,ENSMUSG00000005148,ENSMUSG00000005373,ENSMUSG00000005677,ENSMUSG00000005917,ENSMUSG00000007946,ENSMUSG00000008496,ENSMUSG00000009248,ENSMUSG00000012350,…
1	!	0.00618	429	2501	88	0.035	0.205	GO:0042110	BP	1	T cell activation	1	ENSMUSG00000000409,ENSMUSG00000000706,ENSMUSG00000000731,ENSMUSG00000001444,ENSMUSG00000002057,ENSMUSG00000002983,ENSMUSG00000003882,ENSMUSG00000003934,ENSMUSG00000004043,ENSMUSG00000004296,ENSMUSG00000006538,ENSMUSG00000015314,ENSMUSG00000015316,ENSMUSG00000015619,ENSMUSG00000016496,ENSMUSG00000018899,ENSMUSG00000020101,ENSMUSG00000020143,ENSMUSG00000021356,ENSMUSG00000021457,ENSMUSG00000022015,…
1	!	0.00628	423	2501	87	0.035	0.206	GO:0048568	BP	1	embryonic organ development	1	ENSMUSG00000000093,ENSMUSG00000000126,ENSMUSG00000000435,ENSMUSG00000000690,ENSMUSG00000001249,ENSMUSG00000001656,ENSMUSG00000004891,ENSMUSG00000005917,ENSMUSG00000006445,ENSMUSG00000006538,ENSMUSG00000008999,ENSMUSG00000009248,ENSMUSG00000009900,ENSMUSG00000012819,ENSMUSG00000014030,ENSMUSG00000015053,ENSMUSG00000015619,ENSMUSG00000018486,ENSMUSG00000018604,ENSMUSG00000018973,ENSMUSG00000020173,…
1	!	0.00636	362	2501	77	0.031	0.213	GO:0000987	MF	1	core promoter proximal region sequence-specific DNA binding	1	ENSMUSG00000000093,ENSMUSG00000000247,ENSMUSG00000000435,ENSMUSG00000001656,ENSMUSG00000002983,ENSMUSG00000003032,ENSMUSG00000003282,ENSMUSG00000003545,ENSMUSG00000004359,ENSMUSG00000004661,ENSMUSG00000005148,ENSMUSG00000005373,ENSMUSG00000005917,ENSMUSG00000008496,ENSMUSG00000009248,ENSMUSG00000012350,ENSMUSG00000012520,ENSMUSG00000014030,ENSMUSG00000015619,ENSMUSG00000017861,ENSMUSG00000018263,…
1	!	0.00642	16357	2712	2226	0.821	0.136	TF:M08793_1	tf	1	Factor: MEL1; motif: GATGAG; match class: 1	1	ENSMUSG00000000093,ENSMUSG00000000126,ENSMUSG00000000159,ENSMUSG00000000184,ENSMUSG00000000247,ENSMUSG00000000320,ENSMUSG00000000359,ENSMUSG00000000409,ENSMUSG00000000435,ENSMUSG00000000486,ENSMUSG00000000562,ENSMUSG00000000706,ENSMUSG00000000766,ENSMUSG00000000792,ENSMUSG00000000794,ENSMUSG00000000817,ENSMUSG00000001027,ENSMUSG00000001155,ENSMUSG00000001249,ENSMUSG00000001333,ENSMUSG00000001403,…
1	!	0.00709	363	2501	77	0.031	0.212	GO:0001159	MF	1	core promoter proximal region DNA binding	1	ENSMUSG00000000093,ENSMUSG00000000247,ENSMUSG00000000435,ENSMUSG00000001656,ENSMUSG00000002983,ENSMUSG00000003032,ENSMUSG00000003282,ENSMUSG00000003545,ENSMUSG00000004359,ENSMUSG00000004661,ENSMUSG00000005148,ENSMUSG00000005373,ENSMUSG00000005917,ENSMUSG00000008496,ENSMUSG00000009248,ENSMUSG00000012350,ENSMUSG00000012520,ENSMUSG00000014030,ENSMUSG00000015619,ENSMUSG00000017861,ENSMUSG00000018263,…
1	!	0.00774	1197	2712	209	0.077	0.175	TF:M00971_1	tf	1	Factor: Ets; motif: ACTTCCTS; match class: 1	1	ENSMUSG00000000244,ENSMUSG00000000409,ENSMUSG00000000884,ENSMUSG00000001661,ENSMUSG00000004446,ENSMUSG00000004540,ENSMUSG00000005057,ENSMUSG00000005640,ENSMUSG00000005947,ENSMUSG00000006345,ENSMUSG00000008999,ENSMUSG00000009545,ENSMUSG00000009628,ENSMUSG00000017607,ENSMUSG00000017718,ENSMUSG00000018776,ENSMUSG00000018973,ENSMUSG00000019122,ENSMUSG00000019866,ENSMUSG00000019992,ENSMUSG00000020101,…
1	!	0.00801	5513	2712	817	0.301	0.148	TF:M00977_0	tf	1	Factor: EBF; motif: KTCCCYWGRGA; match class: 0	1	ENSMUSG00000000486,ENSMUSG00000000792,ENSMUSG00000000884,ENSMUSG00000001333,ENSMUSG00000001403,ENSMUSG00000001444,ENSMUSG00000001588,ENSMUSG00000001661,ENSMUSG00000001672,ENSMUSG00000001870,ENSMUSG00000001930,ENSMUSG00000002279,ENSMUSG00000003477,ENSMUSG00000003505,ENSMUSG00000003934,ENSMUSG00000004371,ENSMUSG00000004446,ENSMUSG00000005057,ENSMUSG00000005087,ENSMUSG00000005237,ENSMUSG00000005355,…
1	!	0.00845	7086	2712	1029	0.379	0.145	TF:M01889_1	tf	1	Factor: Smad4; motif: TGTCTGN; match class: 1	1	ENSMUSG00000000159,ENSMUSG00000000184,ENSMUSG00000000244,ENSMUSG00000000247,ENSMUSG00000000359,ENSMUSG00000000435,ENSMUSG00000000884,ENSMUSG00000001027,ENSMUSG00000001095,ENSMUSG00000001225,ENSMUSG00000001249,ENSMUSG00000001444,ENSMUSG00000001494,ENSMUSG00000001656,ENSMUSG00000002699,ENSMUSG00000002870,ENSMUSG00000003309,ENSMUSG00000003341,ENSMUSG00000003505,ENSMUSG00000003882,ENSMUSG00000003934,…
1	!	0.00854	966	2501	170	0.068	0.176	GO:0001071	MF	1	nucleic acid binding transcription factor activity	1	ENSMUSG00000000093,ENSMUSG00000000247,ENSMUSG00000000435,ENSMUSG00000001497,ENSMUSG00000001655,ENSMUSG00000001656,ENSMUSG00000002057,ENSMUSG00000002983,ENSMUSG00000003032,ENSMUSG00000003282,ENSMUSG00000003545,ENSMUSG00000004043,ENSMUSG00000004359,ENSMUSG00000004661,ENSMUSG00000005148,ENSMUSG00000005373,ENSMUSG00000005677,ENSMUSG00000005917,ENSMUSG00000008496,ENSMUSG00000009248,ENSMUSG00000012350,…
1	!	0.00854	966	2501	170	0.068	0.176	GO:0003700	MF	1	transcription factor activity, sequence-specific DNA binding	1	ENSMUSG00000000093,ENSMUSG00000000247,ENSMUSG00000000435,ENSMUSG00000001497,ENSMUSG00000001655,ENSMUSG00000001656,ENSMUSG00000002057,ENSMUSG00000002983,ENSMUSG00000003032,ENSMUSG00000003282,ENSMUSG00000003545,ENSMUSG00000004043,ENSMUSG00000004359,ENSMUSG00000004661,ENSMUSG00000005148,ENSMUSG00000005373,ENSMUSG00000005677,ENSMUSG00000005917,ENSMUSG00000008496,ENSMUSG00000009248,ENSMUSG00000012350,…
1	!	0.00855	90	2501	28	0.011	0.311	GO:0032649	BP	1	regulation of interferon-gamma production	1	ENSMUSG00000004296,ENSMUSG00000015314,ENSMUSG00000015316,ENSMUSG00000015619,ENSMUSG00000016496,ENSMUSG00000021994,ENSMUSG00000024401,ENSMUSG00000025383,ENSMUSG00000026069,ENSMUSG00000026070,ENSMUSG00000026177,ENSMUSG00000026700,ENSMUSG00000026983,ENSMUSG00000027718,ENSMUSG00000032093,ENSMUSG00000037944,ENSMUSG00000039005,ENSMUSG00000041515,ENSMUSG00000042250,ENSMUSG00000042258,ENSMUSG00000042677,…
1	!	0.00913	8	2501	7	0.003	0.875	GO:0019957	MF	1	C-C chemokine binding	1	ENSMUSG00000025804,ENSMUSG00000035448,ENSMUSG00000037944,ENSMUSG00000044534,ENSMUSG00000044786,ENSMUSG00000049103,ENSMUSG00000079227
1	!	0.00972	663	2501	124	0.05	0.187	GO:0008284	BP	1	positive regulation of cell proliferation	1	ENSMUSG00000000093,ENSMUSG00000000184,ENSMUSG00000000320,ENSMUSG00000001249,ENSMUSG00000003282,ENSMUSG00000004043,ENSMUSG00000004296,ENSMUSG00000004371,ENSMUSG00000004654,ENSMUSG00000004655,ENSMUSG00000004891,ENSMUSG00000005373,ENSMUSG00000006538,ENSMUSG00000009900,ENSMUSG00000014599,ENSMUSG00000015316,ENSMUSG00000017652,ENSMUSG00000018238,ENSMUSG00000018263,ENSMUSG00000018604,ENSMUSG00000019768,…
1	!	0.0108	17035	2712	2307	0.851	0.135	TF:M03541_1	tf	1	Factor: C-Jun; motif: TGACTC; match class: 1	1	ENSMUSG00000000126,ENSMUSG00000000244,ENSMUSG00000000247,ENSMUSG00000000359,ENSMUSG00000000409,ENSMUSG00000000435,ENSMUSG00000000486,ENSMUSG00000000562,ENSMUSG00000000706,ENSMUSG00000000731,ENSMUSG00000000766,ENSMUSG00000000794,ENSMUSG00000000817,ENSMUSG00000000884,ENSMUSG00000001021,ENSMUSG00000001027,ENSMUSG00000001095,ENSMUSG00000001155,ENSMUSG00000001225,ENSMUSG00000001249,ENSMUSG00000001333,…
1	!	0.011	225	2501	53	0.021	0.236	GO:0050727	BP	1	regulation of inflammatory response	1	ENSMUSG00000004043,ENSMUSG00000004296,ENSMUSG00000006345,ENSMUSG00000015619,ENSMUSG00000016024,ENSMUSG00000019429,ENSMUSG00000019768,ENSMUSG00000019850,ENSMUSG00000020826,ENSMUSG00000021322,ENSMUSG00000021994,ENSMUSG00000022015,ENSMUSG00000022181,ENSMUSG00000022383,ENSMUSG00000022534,ENSMUSG00000024401,ENSMUSG00000024670,ENSMUSG00000026069,ENSMUSG00000026072,ENSMUSG00000026700,ENSMUSG00000026770,…
1	!	0.0111	587	2501	112	0.045	0.191	GO:0098609	BP	1	cell-cell adhesion	1	ENSMUSG00000000244,ENSMUSG00000000320,ENSMUSG00000000409,ENSMUSG00000000706,ENSMUSG00000002057,ENSMUSG00000003032,ENSMUSG00000003882,ENSMUSG00000003934,ENSMUSG00000004043,ENSMUSG00000004296,ENSMUSG00000005958,ENSMUSG00000006538,ENSMUSG00000008999,ENSMUSG00000009900,ENSMUSG00000012819,ENSMUSG00000015316,ENSMUSG00000015619,ENSMUSG00000016494,ENSMUSG00000016496,ENSMUSG00000017446,ENSMUSG00000018899,…
1	!	0.0116	15306	2712	2093	0.772	0.137	TF:M00531_0	tf	1	Factor: nerf; motif: YRNCAGGAAGYRGSTBDS; match class: 0	1	ENSMUSG00000000093,ENSMUSG00000000159,ENSMUSG00000000184,ENSMUSG00000000244,ENSMUSG00000000247,ENSMUSG00000000320,ENSMUSG00000000359,ENSMUSG00000000409,ENSMUSG00000000486,ENSMUSG00000000562,ENSMUSG00000000690,ENSMUSG00000000731,ENSMUSG00000000766,ENSMUSG00000000792,ENSMUSG00000000794,ENSMUSG00000000817,ENSMUSG00000001021,ENSMUSG00000001027,ENSMUSG00000001095,ENSMUSG00000001155,ENSMUSG00000001225,…
1	!	0.0126	296	2501	65	0.026	0.22	GO:0007159	BP	1	leukocyte cell-cell adhesion	1	ENSMUSG00000000409,ENSMUSG00000000706,ENSMUSG00000002057,ENSMUSG00000003032,ENSMUSG00000003882,ENSMUSG00000003934,ENSMUSG00000004043,ENSMUSG00000004296,ENSMUSG00000006538,ENSMUSG00000008999,ENSMUSG00000015316,ENSMUSG00000015619,ENSMUSG00000016496,ENSMUSG00000018899,ENSMUSG00000020101,ENSMUSG00000021457,ENSMUSG00000022015,ENSMUSG00000022367,ENSMUSG00000022383,ENSMUSG00000023274,ENSMUSG00000024401,…
1	!	0.0131	3	63	3	0.048	1	CORUM:3202	cor	1	Il3rb1-Shc-Ship complex, IL-3 stimulated	1	ENSMUSG00000026288,ENSMUSG00000042626,ENSMUSG00000071713
1	!	0.0137	187	2501	46	0.018	0.246	GO:0032944	BP	1	regulation of mononuclear cell proliferation	1	ENSMUSG00000000706,ENSMUSG00000004043,ENSMUSG00000004296,ENSMUSG00000006538,ENSMUSG00000009900,ENSMUSG00000014599,ENSMUSG00000015316,ENSMUSG00000016496,ENSMUSG00000017652,ENSMUSG00000018168,ENSMUSG00000018899,ENSMUSG00000020101,ENSMUSG00000021457,ENSMUSG00000024670,ENSMUSG00000025383,ENSMUSG00000026117,ENSMUSG00000026288,ENSMUSG00000026700,ENSMUSG00000026770,ENSMUSG00000027544,ENSMUSG00000027718,…
1	!	0.0142	10536	2712	1482	0.546	0.141	TF:M04613_1	tf	1	Factor: HLTF; motif: AGSCARAAAGYRGSTGS; match class: 1	1	ENSMUSG00000000126,ENSMUSG00000000244,ENSMUSG00000000320,ENSMUSG00000000409,ENSMUSG00000000562,ENSMUSG00000000690,ENSMUSG00000000706,ENSMUSG00000000731,ENSMUSG00000000766,ENSMUSG00000000884,ENSMUSG00000001497,ENSMUSG00000001517,ENSMUSG00000001656,ENSMUSG00000001665,ENSMUSG00000001672,ENSMUSG00000001918,ENSMUSG00000001930,ENSMUSG00000002057,ENSMUSG00000002227,ENSMUSG00000002279,ENSMUSG00000002565,…
1	!	0.0145	37	522	16	0.031	0.432	HP:0008002	hp	1	Abnormality of macular pigmentation	1	ENSMUSG00000004231,ENSMUSG00000023978,ENSMUSG00000026114,ENSMUSG00000027463,ENSMUSG00000029491,ENSMUSG00000030324,ENSMUSG00000030523,ENSMUSG00000031450,ENSMUSG00000034452,ENSMUSG00000041460,ENSMUSG00000049353,ENSMUSG00000056055,ENSMUSG00000061048,ENSMUSG00000064330,ENSMUSG00000070337,ENSMUSG00000093865
1	!	0.0151	171	2501	43	0.017	0.251	GO:1903039	BP	1	positive regulation of leukocyte cell-cell adhesion	1	ENSMUSG00000000409,ENSMUSG00000003882,ENSMUSG00000003934,ENSMUSG00000004043,ENSMUSG00000004296,ENSMUSG00000006538,ENSMUSG00000015316,ENSMUSG00000015619,ENSMUSG00000016496,ENSMUSG00000018899,ENSMUSG00000021457,ENSMUSG00000022015,ENSMUSG00000022367,ENSMUSG00000023274,ENSMUSG00000024401,ENSMUSG00000024670,ENSMUSG00000025383,ENSMUSG00000026117,ENSMUSG00000026700,ENSMUSG00000026770,ENSMUSG00000027718,…
1	!	0.0174	4836	2712	721	0.266	0.149	TF:M00927_1	tf	1	Factor: AP-4; motif: RNCAGCTGC; match class: 1	1	ENSMUSG00000000247,ENSMUSG00000000486,ENSMUSG00000000731,ENSMUSG00000000792,ENSMUSG00000001095,ENSMUSG00000001249,ENSMUSG00000001333,ENSMUSG00000001403,ENSMUSG00000001444,ENSMUSG00000001494,ENSMUSG00000001497,ENSMUSG00000001517,ENSMUSG00000001665,ENSMUSG00000001870,ENSMUSG00000002057,ENSMUSG00000003436,ENSMUSG00000003545,ENSMUSG00000003882,ENSMUSG00000004371,ENSMUSG00000004446,ENSMUSG00000004655,…
1	!	0.0179	200	2501	48	0.019	0.24	GO:0022409	BP	1	positive regulation of cell-cell adhesion	1	ENSMUSG00000000409,ENSMUSG00000003882,ENSMUSG00000003934,ENSMUSG00000004043,ENSMUSG00000004296,ENSMUSG00000006538,ENSMUSG00000008999,ENSMUSG00000009900,ENSMUSG00000015316,ENSMUSG00000015619,ENSMUSG00000016496,ENSMUSG00000018899,ENSMUSG00000021360,ENSMUSG00000021457,ENSMUSG00000021994,ENSMUSG00000022015,ENSMUSG00000022367,ENSMUSG00000023274,ENSMUSG00000024401,ENSMUSG00000024670,ENSMUSG00000025383,…
1	!	0.0196	7283	2712	1051	0.388	0.144	TF:M03582_1	tf	1	Factor: TWIST; motif: CACCTGG; match class: 1	1	ENSMUSG00000000126,ENSMUSG00000000159,ENSMUSG00000000184,ENSMUSG00000000244,ENSMUSG00000000320,ENSMUSG00000000359,ENSMUSG00000000409,ENSMUSG00000000486,ENSMUSG00000000706,ENSMUSG00000000731,ENSMUSG00000000766,ENSMUSG00000000794,ENSMUSG00000000884,ENSMUSG00000001021,ENSMUSG00000001027,ENSMUSG00000001155,ENSMUSG00000001249,ENSMUSG00000001494,ENSMUSG00000001661,ENSMUSG00000001870,ENSMUSG00000001918,…
1	!	0.0204	1660	2501	268	0.107	0.161	GO:0009605	BP	1	response to external stimulus	1	ENSMUSG00000000244,ENSMUSG00000000247,ENSMUSG00000000320,ENSMUSG00000001249,ENSMUSG00000003032,ENSMUSG00000003934,ENSMUSG00000004043,ENSMUSG00000004296,ENSMUSG00000004655,ENSMUSG00000005952,ENSMUSG00000005958,ENSMUSG00000006056,ENSMUSG00000006345,ENSMUSG00000006445,ENSMUSG00000008999,ENSMUSG00000009350,ENSMUSG00000009772,ENSMUSG00000009900,ENSMUSG00000010751,ENSMUSG00000014599,ENSMUSG00000015316,…
1	!	0.0204	15327	2712	2093	0.772	0.137	TF:M02262_1	tf	1	Factor: PPARgamma:RXR-alpha; motif: NTRGGNCARAGGKCA; match class: 1	1	ENSMUSG00000000126,ENSMUSG00000000159,ENSMUSG00000000184,ENSMUSG00000000244,ENSMUSG00000000247,ENSMUSG00000000320,ENSMUSG00000000359,ENSMUSG00000000409,ENSMUSG00000000435,ENSMUSG00000000486,ENSMUSG00000000690,ENSMUSG00000000706,ENSMUSG00000000731,ENSMUSG00000000766,ENSMUSG00000000792,ENSMUSG00000000817,ENSMUSG00000001021,ENSMUSG00000001027,ENSMUSG00000001155,ENSMUSG00000001225,ENSMUSG00000001249,…
1	!	0.0211	7841	2712	1125	0.415	0.143	TF:M03804_1	tf	1	Factor: Tal-1; motif: CAGATGG; match class: 1	1	ENSMUSG00000000244,ENSMUSG00000000320,ENSMUSG00000000731,ENSMUSG00000000884,ENSMUSG00000001027,ENSMUSG00000001095,ENSMUSG00000001403,ENSMUSG00000001444,ENSMUSG00000001494,ENSMUSG00000001588,ENSMUSG00000001657,ENSMUSG00000001665,ENSMUSG00000001918,ENSMUSG00000001930,ENSMUSG00000002057,ENSMUSG00000002279,ENSMUSG00000003309,ENSMUSG00000003436,ENSMUSG00000003477,ENSMUSG00000003505,ENSMUSG00000004043,…
1	!	0.0214	17	2501	10	0.004	0.588	GO:0042923	MF	1	neuropeptide binding	1	ENSMUSG00000000766,ENSMUSG00000025905,ENSMUSG00000033774,ENSMUSG00000034117,ENSMUSG00000043441,ENSMUSG00000044933,ENSMUSG00000047904,ENSMUSG00000050511,ENSMUSG00000070547,ENSMUSG00000074109
1	!	0.0215	6132	2712	896	0.33	0.146	TF:M01888_1	tf	1	Factor: Smad3; motif: NGNCAGACASNNN; match class: 1	1	ENSMUSG00000000320,ENSMUSG00000000435,ENSMUSG00000000731,ENSMUSG00000001095,ENSMUSG00000001225,ENSMUSG00000001444,ENSMUSG00000001497,ENSMUSG00000001665,ENSMUSG00000002699,ENSMUSG00000002870,ENSMUSG00000002983,ENSMUSG00000003309,ENSMUSG00000003341,ENSMUSG00000003477,ENSMUSG00000003882,ENSMUSG00000003934,ENSMUSG00000004371,ENSMUSG00000004446,ENSMUSG00000004609,ENSMUSG00000004654,ENSMUSG00000004655,…
1	!	0.0217	99	2501	29	0.012	0.293	GO:0032609	BP	1	interferon-gamma production	1	ENSMUSG00000004296,ENSMUSG00000015314,ENSMUSG00000015316,ENSMUSG00000015619,ENSMUSG00000016496,ENSMUSG00000021994,ENSMUSG00000024401,ENSMUSG00000025383,ENSMUSG00000026069,ENSMUSG00000026070,ENSMUSG00000026177,ENSMUSG00000026700,ENSMUSG00000026983,ENSMUSG00000027718,ENSMUSG00000032093,ENSMUSG00000037944,ENSMUSG00000039005,ENSMUSG00000041515,ENSMUSG00000042250,ENSMUSG00000042258,ENSMUSG00000042677,…
1	!	0.0223	6512	2712	947	0.349	0.145	TF:M02791_1	tf	1	Factor: RXRalpha; motif: NNNNNTGACCCCNNNNN; match class: 1	1	ENSMUSG00000000126,ENSMUSG00000000159,ENSMUSG00000000184,ENSMUSG00000000244,ENSMUSG00000000706,ENSMUSG00000000731,ENSMUSG00000000792,ENSMUSG00000001021,ENSMUSG00000001155,ENSMUSG00000001249,ENSMUSG00000001444,ENSMUSG00000001494,ENSMUSG00000001588,ENSMUSG00000001656,ENSMUSG00000001665,ENSMUSG00000001672,ENSMUSG00000001918,ENSMUSG00000001930,ENSMUSG00000002076,ENSMUSG00000002983,ENSMUSG00000003032,…
1	!	0.023	125	2501	34	0.014	0.272	GO:0007187	BP	1	G-protein coupled receptor signaling pathway, coupled to cyclic nucleotide second messenger	1	ENSMUSG00000000766,ENSMUSG00000004654,ENSMUSG00000019429,ENSMUSG00000021721,ENSMUSG00000024697,ENSMUSG00000025127,ENSMUSG00000025905,ENSMUSG00000031489,ENSMUSG00000032937,ENSMUSG00000033774,ENSMUSG00000034009,ENSMUSG00000034117,ENSMUSG00000037759,ENSMUSG00000039358,ENSMUSG00000040125,ENSMUSG00000043017,ENSMUSG00000043441,ENSMUSG00000044017,ENSMUSG00000044819,ENSMUSG00000044933,ENSMUSG00000044988,…
1	!	0.0237	350	2501	73	0.029	0.209	GO:0022407	BP	1	regulation of cell-cell adhesion	1	ENSMUSG00000000320,ENSMUSG00000000409,ENSMUSG00000000706,ENSMUSG00000002057,ENSMUSG00000003032,ENSMUSG00000003882,ENSMUSG00000003934,ENSMUSG00000004043,ENSMUSG00000004296,ENSMUSG00000005958,ENSMUSG00000006538,ENSMUSG00000008999,ENSMUSG00000009900,ENSMUSG00000015316,ENSMUSG00000015619,ENSMUSG00000016496,ENSMUSG00000017446,ENSMUSG00000018899,ENSMUSG00000019850,ENSMUSG00000020101,ENSMUSG00000021360,…
1	!	0.0245	12459	2712	1728	0.637	0.139	TF:M00147_1	tf	1	Factor: HSF2; motif: NGAANNWTCK; match class: 1	1	ENSMUSG00000000126,ENSMUSG00000000184,ENSMUSG00000000247,ENSMUSG00000000320,ENSMUSG00000000359,ENSMUSG00000000409,ENSMUSG00000000486,ENSMUSG00000000562,ENSMUSG00000000690,ENSMUSG00000000731,ENSMUSG00000000766,ENSMUSG00000000792,ENSMUSG00000000794,ENSMUSG00000000817,ENSMUSG00000000884,ENSMUSG00000001027,ENSMUSG00000001095,ENSMUSG00000001249,ENSMUSG00000001333,ENSMUSG00000001497,ENSMUSG00000001588,…
1	!	0.0262	197	2501	47	0.019	0.239	GO:0070663	BP	1	regulation of leukocyte proliferation	1	ENSMUSG00000000706,ENSMUSG00000004043,ENSMUSG00000004296,ENSMUSG00000006538,ENSMUSG00000009900,ENSMUSG00000014599,ENSMUSG00000015316,ENSMUSG00000016496,ENSMUSG00000017652,ENSMUSG00000018168,ENSMUSG00000018899,ENSMUSG00000020101,ENSMUSG00000021457,ENSMUSG00000024670,ENSMUSG00000025383,ENSMUSG00000026117,ENSMUSG00000026288,ENSMUSG00000026700,ENSMUSG00000026770,ENSMUSG00000027544,ENSMUSG00000027670,…
1	!	0.0266	413	2501	83	0.033	0.201	GO:0051606	BP	1	detection of stimulus	1	ENSMUSG00000001249,ENSMUSG00000005952,ENSMUSG00000016024,ENSMUSG00000023979,ENSMUSG00000023992,ENSMUSG00000026417,ENSMUSG00000027966,ENSMUSG00000028738,ENSMUSG00000029205,ENSMUSG00000029491,ENSMUSG00000029503,ENSMUSG00000029663,ENSMUSG00000030324,ENSMUSG00000030470,ENSMUSG00000031738,ENSMUSG00000031789,ENSMUSG00000032818,ENSMUSG00000033355,ENSMUSG00000035279,ENSMUSG00000037053,ENSMUSG00000037446,…
1	!	0.0273	186	2501	45	0.018	0.242	GO:0050670	BP	1	regulation of lymphocyte proliferation	1	ENSMUSG00000000706,ENSMUSG00000004043,ENSMUSG00000004296,ENSMUSG00000006538,ENSMUSG00000009900,ENSMUSG00000015316,ENSMUSG00000016496,ENSMUSG00000017652,ENSMUSG00000018168,ENSMUSG00000018899,ENSMUSG00000020101,ENSMUSG00000021457,ENSMUSG00000024670,ENSMUSG00000025383,ENSMUSG00000026117,ENSMUSG00000026288,ENSMUSG00000026700,ENSMUSG00000026770,ENSMUSG00000027544,ENSMUSG00000027718,ENSMUSG00000028749,…
1	!	0.0273	489	2501	95	0.038	0.194	GO:0007423	BP	1	sensory organ development	1	ENSMUSG00000000093,ENSMUSG00000000247,ENSMUSG00000000435,ENSMUSG00000000817,ENSMUSG00000001249,ENSMUSG00000001655,ENSMUSG00000002870,ENSMUSG00000003032,ENSMUSG00000004655,ENSMUSG00000004891,ENSMUSG00000005917,ENSMUSG00000006445,ENSMUSG00000006538,ENSMUSG00000008999,ENSMUSG00000009545,ENSMUSG00000009900,ENSMUSG00000012520,ENSMUSG00000012819,ENSMUSG00000015053,ENSMUSG00000015619,ENSMUSG00000018845,…
1	!	0.0285	3929	2712	594	0.219	0.151	TF:M01871_0	tf	1	Factor: COE1; motif: NCYCWRGGGANYNN; match class: 0	1	ENSMUSG00000000093,ENSMUSG00000000435,ENSMUSG00000000486,ENSMUSG00000001155,ENSMUSG00000001333,ENSMUSG00000001517,ENSMUSG00000001661,ENSMUSG00000001672,ENSMUSG00000001870,ENSMUSG00000002057,ENSMUSG00000002279,ENSMUSG00000003505,ENSMUSG00000003545,ENSMUSG00000004540,ENSMUSG00000005237,ENSMUSG00000005649,ENSMUSG00000005677,ENSMUSG00000005947,ENSMUSG00000005958,ENSMUSG00000006056,ENSMUSG00000006344,…
1	!	0.0308	24	522	12	0.023	0.5	HP:0007766	hp	1	Optic disc hypoplasia	1	ENSMUSG00000027547,ENSMUSG00000029491,ENSMUSG00000030324,ENSMUSG00000030523,ENSMUSG00000031450,ENSMUSG00000034452,ENSMUSG00000041460,ENSMUSG00000056055,ENSMUSG00000058897,ENSMUSG00000070337,ENSMUSG00000074622,ENSMUSG00000093865
1	!	0.0312	11238	2712	1569	0.579	0.14	TF:M00658_0	tf	1	Factor: PU.1; motif: WGAGGAAG; match class: 0	1	ENSMUSG00000000093,ENSMUSG00000000126,ENSMUSG00000000184,ENSMUSG00000000244,ENSMUSG00000000247,ENSMUSG00000000409,ENSMUSG00000000435,ENSMUSG00000000486,ENSMUSG00000000562,ENSMUSG00000000690,ENSMUSG00000000706,ENSMUSG00000000731,ENSMUSG00000000766,ENSMUSG00000000817,ENSMUSG00000001021,ENSMUSG00000001225,ENSMUSG00000001249,ENSMUSG00000001494,ENSMUSG00000001497,ENSMUSG00000001517,ENSMUSG00000001657,…
1	!	0.0322	353	2501	73	0.029	0.207	GO:0000978	MF	1	RNA polymerase II core promoter proximal region sequence-specific DNA binding	1	ENSMUSG00000000093,ENSMUSG00000000247,ENSMUSG00000000435,ENSMUSG00000001656,ENSMUSG00000002983,ENSMUSG00000003282,ENSMUSG00000003545,ENSMUSG00000004359,ENSMUSG00000004661,ENSMUSG00000005148,ENSMUSG00000005373,ENSMUSG00000005917,ENSMUSG00000008496,ENSMUSG00000009248,ENSMUSG00000012350,ENSMUSG00000012520,ENSMUSG00000014030,ENSMUSG00000017861,ENSMUSG00000018263,ENSMUSG00000018604,ENSMUSG00000018899,…
1	!	0.0351	5788	2712	847	0.312	0.146	TF:M08897_1	tf	1	Factor: SMAD; motif: TGTCTGNNN; match class: 1	1	ENSMUSG00000000320,ENSMUSG00000000359,ENSMUSG00000000435,ENSMUSG00000000731,ENSMUSG00000001095,ENSMUSG00000001155,ENSMUSG00000001249,ENSMUSG00000001333,ENSMUSG00000001444,ENSMUSG00000001494,ENSMUSG00000001588,ENSMUSG00000001661,ENSMUSG00000001672,ENSMUSG00000002057,ENSMUSG00000002983,ENSMUSG00000003477,ENSMUSG00000003934,ENSMUSG00000004043,ENSMUSG00000004296,ENSMUSG00000004371,ENSMUSG00000004655,…
1	!	0.0359	67	2501	22	0.009	0.328	GO:0005249	MF	1	voltage-gated potassium channel activity	1	ENSMUSG00000009545,ENSMUSG00000022342,ENSMUSG00000023243,ENSMUSG00000025221,ENSMUSG00000026114,ENSMUSG00000028033,ENSMUSG00000030247,ENSMUSG00000031789,ENSMUSG00000032034,ENSMUSG00000034402,ENSMUSG00000035355,ENSMUSG00000038201,ENSMUSG00000039639,ENSMUSG00000040164,ENSMUSG00000041248,ENSMUSG00000041695,ENSMUSG00000042861,ENSMUSG00000047298,ENSMUSG00000047959,ENSMUSG00000059852,ENSMUSG00000062609,…
1	!	0.0366	83	522	26	0.05	0.313	HP:0001944	hp	1	Dehydration	1	ENSMUSG00000001225,ENSMUSG00000020758,ENSMUSG00000020892,ENSMUSG00000024770,ENSMUSG00000025885,ENSMUSG00000026354,ENSMUSG00000026479,ENSMUSG00000026639,ENSMUSG00000030340,ENSMUSG00000032323,ENSMUSG00000032373,ENSMUSG00000032691,ENSMUSG00000036036,ENSMUSG00000038092,ENSMUSG00000038567,ENSMUSG00000038600,ENSMUSG00000041248,ENSMUSG00000041301,ENSMUSG00000043760,ENSMUSG00000050296,ENSMUSG00000062410,…
1	!	0.0377	781	2501	139	0.056	0.178	GO:0009986	CC	1	cell surface	1	ENSMUSG00000000244,ENSMUSG00000000817,ENSMUSG00000001249,ENSMUSG00000003882,ENSMUSG00000004609,ENSMUSG00000004654,ENSMUSG00000005268,ENSMUSG00000005947,ENSMUSG00000006389,ENSMUSG00000006445,ENSMUSG00000008590,ENSMUSG00000009900,ENSMUSG00000010751,ENSMUSG00000015316,ENSMUSG00000015568,ENSMUSG00000016024,ENSMUSG00000016494,ENSMUSG00000016496,ENSMUSG00000016763,ENSMUSG00000017652,ENSMUSG00000019326,…
1	!	0.0388	308	522	68	0.13	0.221	HP:0011123	hp	1	Inflammatory abnormality of the skin	1	ENSMUSG00000000731,ENSMUSG00000002279,ENSMUSG00000003882,ENSMUSG00000012819,ENSMUSG00000015619,ENSMUSG00000019768,ENSMUSG00000019850,ENSMUSG00000020758,ENSMUSG00000020892,ENSMUSG00000021565,ENSMUSG00000022510,ENSMUSG00000022534,ENSMUSG00000024349,ENSMUSG00000024459,ENSMUSG00000024770,ENSMUSG00000025279,ENSMUSG00000025804,ENSMUSG00000026117,ENSMUSG00000026395,ENSMUSG00000026479,ENSMUSG00000026480,…
1	!	0.039	166	2501	41	0.016	0.247	GO:0050663	BP	1	cytokine secretion	1	ENSMUSG00000000706,ENSMUSG00000002699,ENSMUSG00000003505,ENSMUSG00000015316,ENSMUSG00000015568,ENSMUSG00000015619,ENSMUSG00000016494,ENSMUSG00000016496,ENSMUSG00000020826,ENSMUSG00000021457,ENSMUSG00000021994,ENSMUSG00000024401,ENSMUSG00000026069,ENSMUSG00000026700,ENSMUSG00000026874,ENSMUSG00000026983,ENSMUSG00000027356,ENSMUSG00000028874,ENSMUSG00000029915,ENSMUSG00000030142,ENSMUSG00000032691,…
1	!	0.039	166	2501	41	0.016	0.247	GO:2000027	BP	1	regulation of organ morphogenesis	1	ENSMUSG00000000093,ENSMUSG00000001249,ENSMUSG00000001497,ENSMUSG00000001656,ENSMUSG00000008999,ENSMUSG00000009900,ENSMUSG00000014599,ENSMUSG00000015619,ENSMUSG00000016494,ENSMUSG00000018263,ENSMUSG00000018486,ENSMUSG00000019768,ENSMUSG00000019850,ENSMUSG00000020679,ENSMUSG00000021994,ENSMUSG00000022479,ENSMUSG00000022676,ENSMUSG00000024134,ENSMUSG00000024401,ENSMUSG00000025902,ENSMUSG00000026976,…
1	!	0.0417	97	2501	28	0.011	0.289	GO:0042107	BP	1	cytokine metabolic process	1	ENSMUSG00000003032,ENSMUSG00000004043,ENSMUSG00000015619,ENSMUSG00000016024,ENSMUSG00000018899,ENSMUSG00000021356,ENSMUSG00000021457,ENSMUSG00000021994,ENSMUSG00000024401,ENSMUSG00000024713,ENSMUSG00000026288,ENSMUSG00000027318,ENSMUSG00000027718,ENSMUSG00000028602,ENSMUSG00000032093,ENSMUSG00000036526,ENSMUSG00000039005,ENSMUSG00000042265,ENSMUSG00000044786,ENSMUSG00000045322,ENSMUSG00000047123,…
1	!	0.0431	63	2501	21	0.008	0.333	GO:0032729	BP	1	positive regulation of interferon-gamma production	1	ENSMUSG00000004296,ENSMUSG00000015314,ENSMUSG00000015316,ENSMUSG00000021994,ENSMUSG00000024401,ENSMUSG00000025383,ENSMUSG00000026070,ENSMUSG00000026177,ENSMUSG00000026700,ENSMUSG00000027718,ENSMUSG00000032093,ENSMUSG00000039005,ENSMUSG00000041515,ENSMUSG00000042258,ENSMUSG00000045005,ENSMUSG00000045322,ENSMUSG00000049103,ENSMUSG00000050241,ENSMUSG00000054892,ENSMUSG00000056130,ENSMUSG00000068105
#INFO:	PARAMETERS: analytical = 1
#INFO:	PARAMETERS: significant = 1
#INFO:	PARAMETERS: user_thr = 1.00
#INFO:	PARAMETERS: organism = mmusculus
#INFO:	User: http
#INFO:	Host: arak-prod
#INFO:	Time: 2018-2-27 4:2:33
#INFO:	Version: r1741_e90_eg37
#WARNING:	Gene ENSMUSG00000108369 in query [1/35] is not recognized, skipping!
#WARNING:	Gene ENSMUSG00000059101 in query [1/89] is not recognized, skipping!
#WARNING:	Gene ENSMUSG00000054758 in query [1/575] is not recognized, skipping!
#WARNING:	Gene ENSMUSG00000075089 in query [1/726] is not recognized, skipping!
#WARNING:	Gene ENSMUSG00000094302 in query [1/1270] is not recognized, skipping!
#WARNING:	Gene ENSMUSG00000109486 in query [1/1337] is not recognized, skipping!
#WARNING:	Gene ENSMUSG00000100323 in query [1/1445] is not recognized, skipping!
#WARNING:	Gene ENSMUSG00000101976 in query [1/1449] is not recognized, skipping!
#WARNING:	Gene ENSMUSG00000089751 in query [1/1453] is not recognized, skipping!
#WARNING:	Gene ENSMUSG00000103682 in query [1/1594] is not recognized, skipping!
#WARNING:	Gene ENSMUSG00000070984 in query [1/1794] is not recognized, skipping!
#WARNING:	Gene ENSMUSG00000109349 in query [1/1871] is not recognized, skipping!
#WARNING:	Gene ENSMUSG00000056606 in query [1/2115] is not recognized, skipping!
#WARNING:	Gene ENSMUSG00000102183 in query [1/2267] is not recognized, skipping!
#WARNING:	Gene ENSMUSG00000108817 in query [1/2303] is not recognized, skipping!
#WARNING:	Gene ENSMUSG00000107670 in query [1/2569] is not recognized, skipping!
#WARNING:	Gene ENSMUSG00000057351 in query [1/2774] is not recognized, skipping!
#WARNING:	Gene ENSMUSG00000073770 in query [1/2819] is not recognized, skipping!
#WARNING:	Gene ENSMUSG00000089672 in query [1/3354] is not recognized, skipping!
#WARNING:	Gene ENSMUSG00000089763 in query [1/3355] is not recognized, skipping!
#WARNING:	Gene ENSMUSG00000096623 in query [1/3690] is not recognized, skipping!
#WARNING:	Gene ENSMUSG00000094519 in query [1/3983] is not recognized, skipping!
#WARNING:	Gene ENSMUSG00000096912 in query [1/3984] is not recognized, skipping!
#WARNING:	Gene ENSMUSG00000100259 in query [1/4182] is not recognized, skipping!
#WARNING:	Gene ENSMUSG00000087481 in query [1/4711] is not recognized, skipping!
#INFO:	Effective domain size for BIOGRID_NOIEA: 5735, threshold 0.000175
#INFO:	Effective domain size for CORUM_NOIEA: 923, threshold 0.00116
#INFO:	Effective domain size for GO_NOIEA: 19778, threshold 2e-05
#INFO:	Effective domain size for HP_NOIEA: 3747, threshold 4.2e-05
#INFO:	Effective domain size for KEGG_NOIEA: 7853, threshold 0.000407
#INFO:	Effective domain size for REAC_NOIEA: 8939, threshold 0.000133
#INFO:	Effective domain size for TF_NOIEA: 20745, threshold 3.1e-05
#INFO:
#INFO:	--- Gene names and descriptions
#INFO:
#INFO:	QUERY:	ENSMUSG00000052469	TCP10C	t-complex protein 10c [Source:MGI Symbol;Acc:MGI:98543]
#INFO:	QUERY:	ENSMUSG00000078922	TGTP1	T cell specific GTPase 1 [Source:MGI Symbol;Acc:MGI:98734]
#INFO:	QUERY:	ENSMUSG00000096593	VMN2R54	vomeronasal 2, receptor 54 [Source:MGI Symbol;Acc:MGI:3704110]
#INFO:	QUERY:	ENSMUSG00000049249	GM5316	predicted gene 5316 [Source:MGI Symbol;Acc:MGI:3645576]
#INFO:	QUERY:	ENSMUSG00000070828	ZSCAN4F	zinc finger and SCAN domain containing 4F [Source:MGI Symbol;Acc:MGI:3708485]
#INFO:	QUERY:	ENSMUSG00000037053	AZGP1	alpha-2-glycoprotein 1, zinc [Source:MGI Symbol;Acc:MGI:103163]
#INFO:	QUERY:	ENSMUSG00000106627	GM21680	predicted gene, 21680 [Source:MGI Symbol;Acc:MGI:5435035]
#INFO:	QUERY:	ENSMUSG00000046000	NAA11	N(alpha)-acetyltransferase 11, NatA catalytic subunit [Source:MGI Symbol;Acc:MGI:2141314]
#INFO:	QUERY:	ENSMUSG00000100004	TAAR8C	trace amine-associated receptor 8C [Source:MGI Symbol;Acc:MGI:3527452]
#INFO:	QUERY:	ENSMUSG00000022824	MUC13	mucin 13, epithelial transmembrane [Source:MGI Symbol;Acc:MGI:103190]
#INFO:	QUERY:	ENSMUSG00000074401	VMN1R59	vomeronasal 1 receptor 59 [Source:MGI Symbol;Acc:MGI:3033479]
#INFO:	QUERY:	ENSMUSG00000025105	BNC1	basonuclin 1 [Source:MGI Symbol;Acc:MGI:1097164]
#INFO:	QUERY:	ENSMUSG00000072188	GM10354	predicted gene 10354 [Source:MGI Symbol;Acc:MGI:3809109]
#INFO:	QUERY:	ENSMUSG00000075133	OLFR1170	olfactory receptor 1170 [Source:MGI Symbol;Acc:MGI:3031004]
#INFO:	QUERY:	ENSMUSG00000093675	GM20618	predicted gene 20618 [Source:MGI Symbol;Acc:MGI:5313065]
#INFO:	QUERY:	ENSMUSG00000037583	NR0B2	nuclear receptor subfamily 0, group B, member 2 [Source:MGI Symbol;Acc:MGI:1346344]
#INFO:	QUERY:	ENSMUSG00000059179	GM8991	predicted pseudogene 8991 [Source:MGI Symbol;Acc:MGI:3644227]
#INFO:	QUERY:	ENSMUSG00000086172	2700068H02RIK	RIKEN cDNA 2700068H02 gene [Source:MGI Symbol;Acc:MGI:1919813]
#INFO:	QUERY:	ENSMUSG00000051397	TACSTD2	tumor-associated calcium signal transducer 2 [Source:MGI Symbol;Acc:MGI:1861606]
#INFO:	QUERY:	ENSMUSG00000098155	GM27022	predicted gene, 27022 [Source:MGI Symbol;Acc:MGI:5504137]
#INFO:	QUERY:	ENSMUSG00000082046	GM14464	predicted gene 14464 [Source:MGI Symbol;Acc:MGI:3651392]
#INFO:	QUERY:	ENSMUSG00000092220	GM20528	predicted gene 20528 [Source:MGI Symbol;Acc:MGI:5141993]
#INFO:	QUERY:	ENSMUSG00000030050	GKN1	gastrokine 1 [Source:MGI Symbol;Acc:MGI:1913533]
#INFO:	QUERY:	ENSMUSG00000091866	GM6257	predicted gene 6257 [Source:MGI Symbol;Acc:MGI:3645370]
#INFO:	QUERY:	ENSMUSG00000072905	GM2016	predicted gene 2016 [Source:MGI Symbol;Acc:MGI:3780185]
#INFO:	QUERY:	ENSMUSG00000034427	MYO15B	myosin XVB [Source:MGI Symbol;Acc:MGI:2685534]
#INFO:	QUERY:	ENSMUSG00000035539	CCDC180	coiled-coil domain containing 180 [Source:MGI Symbol;Acc:MGI:2685871]
#INFO:	QUERY:	ENSMUSG00000024043	ARHGAP28	Rho GTPase activating protein 28 [Source:MGI Symbol;Acc:MGI:2147003]
#INFO:	QUERY:	ENSMUSG00000083336	OLFR1332-PS1	olfactory receptor 1332, pseudogene 1 [Source:MGI Symbol;Acc:MGI:3031166]
#INFO:	QUERY:	ENSMUSG00000024786	MAJIN	membrane anchored junction protein [Source:MGI Symbol;Acc:MGI:1923913]
#INFO:	QUERY:	ENSMUSG00000094484	GM21244	predicted gene, 21244 [Source:MGI Symbol;Acc:MGI:5434599]
#INFO:	QUERY:	ENSMUSG00000107334	GM7538	predicted gene 7538 [Source:MGI Symbol;Acc:MGI:3647618]
#INFO:	QUERY:	ENSMUSG00000021612	SLC6A18	solute carrier family 6 (neurotransmitter transporter), member 18 [Source:MGI Symbol;Acc:MGI:1336892]
#INFO:	QUERY:	ENSMUSG00000032053	POU2AF1	POU domain, class 2, associating factor 1 [Source:MGI Symbol;Acc:MGI:105086]
#INFO:	QUERY:	ENSMUSG00000108369	N/A	N/A
#INFO:	QUERY:	ENSMUSG00000045824	OLFR574	olfactory receptor 574 [Source:MGI Symbol;Acc:MGI:3030408]
#INFO:	QUERY:	ENSMUSG00000070368	PROK1	prokineticin 1 [Source:MGI Symbol;Acc:MGI:2180370]
#INFO:	QUERY:	ENSMUSG00000036853	MCOLN3	mucolipin 3 [Source:MGI Symbol;Acc:MGI:1890500]
#INFO:	QUERY:	ENSMUSG00000097873	GM26867	predicted gene, 26867 [Source:MGI Symbol;Acc:MGI:5477361]
#INFO:	QUERY:	ENSMUSG00000017446	C1QTNF1	C1q and tumor necrosis factor related protein 1 [Source:MGI Symbol;Acc:MGI:1919254]
#INFO:	QUERY:	ENSMUSG00000101454	GM1988	predicted gene 1988 [Source:MGI Symbol;Acc:MGI:3780157]
#INFO:	QUERY:	ENSMUSG00000037868	EGR2	early growth response 2 [Source:MGI Symbol;Acc:MGI:95296]
#INFO:	QUERY:	ENSMUSG00000105422	GM6089	predicted gene 6089 [Source:MGI Symbol;Acc:MGI:3647070]
#INFO:	QUERY:	ENSMUSG00000072423	PSMB11	proteasome (prosome, macropain) subunit, beta type, 11 [Source:MGI Symbol;Acc:MGI:1921152]
#INFO:	QUERY:	ENSMUSG00000032033	BARX2	BarH-like homeobox 2 [Source:MGI Symbol;Acc:MGI:109617]
#INFO:	QUERY:	ENSMUSG00000063130	CALML3	calmodulin-like 3 [Source:MGI Symbol;Acc:MGI:1917655]
#INFO:	QUERY:	ENSMUSG00000084918	GM12708	predicted gene 12708 [Source:MGI Symbol;Acc:MGI:3652178]
#INFO:	QUERY:	ENSMUSG00000041827	OASL1	2'-5' oligoadenylate synthetase-like 1 [Source:MGI Symbol;Acc:MGI:2180849]
#INFO:	QUERY:	ENSMUSG00000033196	MYH2	myosin, heavy polypeptide 2, skeletal muscle, adult [Source:MGI Symbol;Acc:MGI:1339710]
#INFO:	QUERY:	ENSMUSG00000107596	GM18913	predicted gene, 18913 [Source:MGI Symbol;Acc:MGI:5011098]
#INFO:	QUERY:	ENSMUSG00000037124	TRIM58	tripartite motif-containing 58 [Source:MGI Symbol;Acc:MGI:2684862]
#INFO:	QUERY:	ENSMUSG00000022408	FAM83F	family with sequence similarity 83, member F [Source:MGI Symbol;Acc:MGI:2146227]
#INFO:	QUERY:	ENSMUSG00000030577	CD22	CD22 antigen [Source:MGI Symbol;Acc:MGI:88322]
#INFO:	QUERY:	ENSMUSG00000040891	FOXA3	forkhead box A3 [Source:MGI Symbol;Acc:MGI:1347477]
#INFO:	QUERY:	ENSMUSG00000036647	OLFR6	olfactory receptor 6 [Source:MGI Symbol;Acc:MGI:104713]
#INFO:	QUERY:	ENSMUSG00000054966	LMNTD1	lamin tail domain containing 1 [Source:MGI Symbol;Acc:MGI:1921321]
#INFO:	QUERY:	ENSMUSG00000070847	VMN2R30	vomeronasal 2, receptor 30 [Source:MGI Symbol;Acc:MGI:1316729]
#INFO:	QUERY:	ENSMUSG00000022945	CHAF1B	chromatin assembly factor 1, subunit B (p60) [Source:MGI Symbol;Acc:MGI:1314881]
#INFO:	QUERY:	ENSMUSG00000050650	MRGPRA1	MAS-related GPR, member A1 [Source:MGI Symbol;Acc:MGI:3033095]
#INFO:	QUERY:	ENSMUSG00000095948	GM21708	predicted gene, 21708 [Source:MGI Symbol;Acc:MGI:5435063]
#INFO:	QUERY:	ENSMUSG00000104637	GM42424	predicted gene 42424 [Source:MGI Symbol;Acc:MGI:5662561]
#INFO:	QUERY:	ENSMUSG00000029736	NOBOX	NOBOX oogenesis homeobox [Source:MGI Symbol;Acc:MGI:108011]
#INFO:	QUERY:	ENSMUSG00000102887	GM10857	predicted gene 10857 [Source:MGI Symbol;Acc:MGI:3641733]
#INFO:	QUERY:	ENSMUSG00000078934	9230113P08RIK	RIKEN cDNA 9230113P08 gene [Source:MGI Symbol;Acc:MGI:1925158]
#INFO:	QUERY:	ENSMUSG00000072707	OLFR31	olfactory receptor 31 [Source:MGI Symbol;Acc:MGI:109304]
#INFO:	QUERY:	ENSMUSG00000028214	GEM	GTP binding protein (gene overexpressed in skeletal muscle) [Source:MGI Symbol;Acc:MGI:99844]
#INFO:	QUERY:	ENSMUSG00000105102	GM35507	predicted gene, 35507 [Source:MGI Symbol;Acc:MGI:5594666]
#INFO:	QUERY:	ENSMUSG00000073909	OLFR688	olfactory receptor 688 [Source:MGI Symbol;Acc:MGI:3030522]
#INFO:	QUERY:	ENSMUSG00000048699	KRT90	keratin 90 [Source:MGI Symbol;Acc:MGI:3045312]
#INFO:	QUERY:	ENSMUSG00000018983	E2F2	E2F transcription factor 2 [Source:MGI Symbol;Acc:MGI:1096341]
#INFO:	QUERY:	ENSMUSG00000093978	GM12612	predicted gene 12612 [Source:MGI Symbol;Acc:MGI:3650136]
#INFO:	QUERY:	ENSMUSG00000000359	REM1	rad and gem related GTP binding protein 1 [Source:MGI Symbol;Acc:MGI:1097696]
#INFO:	QUERY:	ENSMUSG00000083271	GM12384	predicted gene 12384 [Source:MGI Symbol;Acc:MGI:3651222]
#INFO:	QUERY:	ENSMUSG00000100374	GM4451	predicted gene 4451 [Source:MGI Symbol;Acc:MGI:3782635]
#INFO:	QUERY:	ENSMUSG00000048031	FCRL5	Fc receptor-like 5 [Source:MGI Symbol;Acc:MGI:3053558]
#INFO:	QUERY:	ENSMUSG00000030162	OLR1	oxidized low density lipoprotein (lectin-like) receptor 1 [Source:MGI Symbol;Acc:MGI:1261434]
#INFO:	QUERY:	ENSMUSG00000102726	GM37937	predicted gene, 37937 [Source:MGI Symbol;Acc:MGI:5611165]
#INFO:	QUERY:	ENSMUSG00000038522	MFSD4B1	major facilitator superfamily domain containing 4B1 [Source:MGI Symbol;Acc:MGI:2143575]
#INFO:	QUERY:	ENSMUSG00000079378	GM8279	predicted gene 8279 [Source:MGI Symbol;Acc:MGI:3779794]
#INFO:	QUERY:	ENSMUSG00000042064	MYO3B	myosin IIIB [Source:MGI Symbol;Acc:MGI:2448580]
#INFO:	QUERY:	ENSMUSG00000053318	SLAMF8	SLAM family member 8 [Source:MGI Symbol;Acc:MGI:1921998]
#INFO:	QUERY:	ENSMUSG00000031073	FGF15	fibroblast growth factor 15 [Source:MGI Symbol;Acc:MGI:1096383]
#INFO:	QUERY:	ENSMUSG00000055632	HMCN2	hemicentin 2 [Source:MGI Symbol;Acc:MGI:2677838]
#INFO:	QUERY:	ENSMUSG00000094736	GM4073	predicted gene 4073 [Source:MGI Symbol;Acc:MGI:3782248]
#INFO:	QUERY:	ENSMUSG00000105570	GM42682	predicted gene 42682 [Source:MGI Symbol;Acc:MGI:5662819]
#INFO:	QUERY:	ENSMUSG00000109114	GM44753	predicted gene 44753 [Source:MGI Symbol;Acc:MGI:5753329]
#INFO:	QUERY:	ENSMUSG00000103643	GM37770	predicted gene, 37770 [Source:MGI Symbol;Acc:MGI:5610998]
#INFO:	QUERY:	ENSMUSG00000108813	RPL19-PS9	ribosomal protein L19, pseudogene 9 [Source:MGI Symbol;Acc:MGI:3643398]
#INFO:	QUERY:	ENSMUSG00000059101	N/A	N/A
#INFO:	QUERY:	ENSMUSG00000096029	OLFR679	olfactory receptor 679 [Source:MGI Symbol;Acc:MGI:3030513]
#INFO:	QUERY:	ENSMUSG00000060735	RXFP3	relaxin family peptide receptor 3 [Source:MGI Symbol;Acc:MGI:2441827]
#INFO:	QUERY:	ENSMUSG00000013338	FER1L4	fer-1-like 4 (C. elegans) [Source:MGI Symbol;Acc:MGI:1921812]
#INFO:	QUERY:	ENSMUSG00000091867	CYP2A22	cytochrome P450, family 2, subfamily a, polypeptide 22 [Source:MGI Symbol;Acc:MGI:3648316]
#INFO:	QUERY:	ENSMUSG00000078137	ANKRD63	ankyrin repeat domain 63 [Source:MGI Symbol;Acc:MGI:2686183]
#INFO:	QUERY:	ENSMUSG00000101195	GM9239	predicted gene 9239 [Source:MGI Symbol;Acc:MGI:3644761]
#INFO:	QUERY:	ENSMUSG00000083930	GM13042	predicted gene 13042 [Source:MGI Symbol;Acc:MGI:3651155]
#INFO:	QUERY:	ENSMUSG00000073962	OLFR576	olfactory receptor 576 [Source:MGI Symbol;Acc:MGI:3030410]
#INFO:	QUERY:	ENSMUSG00000098385	GM27500	predicted gene, 27500 [Source:MGI Symbol;Acc:MGI:5530882]
#INFO:	QUERY:	ENSMUSG00000044086	LMOD3	leiomodin 3 (fetal) [Source:MGI Symbol;Acc:MGI:2444169]
#INFO:	QUERY:	ENSMUSG00000042041	2010003K11RIK	RIKEN cDNA 2010003K11 gene [Source:MGI Symbol;Acc:MGI:1917111]
#INFO:	QUERY:	ENSMUSG00000051314	FFAR2	free fatty acid receptor 2 [Source:MGI Symbol;Acc:MGI:2441731]
#INFO:	QUERY:	ENSMUSG00000009487	OTOG	otogelin [Source:MGI Symbol;Acc:MGI:1202064]
#INFO:	QUERY:	ENSMUSG00000103434	GM36993	predicted gene, 36993 [Source:MGI Symbol;Acc:MGI:5610221]
#INFO:	QUERY:	ENSMUSG00000032034	KCNJ5	potassium inwardly-rectifying channel, subfamily J, member 5 [Source:MGI Symbol;Acc:MGI:104755]
#INFO:	QUERY:	ENSMUSG00000105657	GM42833	predicted gene 42833 [Source:MGI Symbol;Acc:MGI:5662970]
#INFO:	QUERY:	ENSMUSG00000101156	GM29114	predicted gene 29114 [Source:MGI Symbol;Acc:MGI:5579820]
#INFO:	QUERY:	ENSMUSG00000020214	GLIPR1L2	GLI pathogenesis-related 1 like 2 [Source:MGI Symbol;Acc:MGI:1914787]
#INFO:	QUERY:	ENSMUSG00000106001	GM42826	predicted gene 42826 [Source:MGI Symbol;Acc:MGI:5662963]
#INFO:	QUERY:	ENSMUSG00000036169	SOSTDC1	sclerostin domain containing 1 [Source:MGI Symbol;Acc:MGI:1913292]
#INFO:	QUERY:	ENSMUSG00000004654	GHRHR	growth hormone releasing hormone receptor [Source:MGI Symbol;Acc:MGI:95710]
#INFO:	QUERY:	ENSMUSG00000079531	GM5936	predicted gene 5936 [Source:MGI Symbol;Acc:MGI:3645575]
#INFO:	QUERY:	ENSMUSG00000084107	GM13700	predicted gene 13700 [Source:MGI Symbol;Acc:MGI:3651955]
#INFO:	QUERY:	ENSMUSG00000108078	GM8744	predicted gene 8744 [Source:MGI Symbol;Acc:MGI:3644116]
#INFO:	QUERY:	ENSMUSG00000107977	GM44121	predicted gene, 44121 [Source:MGI Symbol;Acc:MGI:5690513]
#INFO:	QUERY:	ENSMUSG00000038201	KCNA7	potassium voltage-gated channel, shaker-related subfamily, member 7 [Source:MGI Symbol;Acc:MGI:96664]
#INFO:	QUERY:	ENSMUSG00000023345	POC1A	POC1 centriolar protein A [Source:MGI Symbol;Acc:MGI:1917485]
#INFO:	QUERY:	ENSMUSG00000060503	OLFR715	olfactory receptor 715 [Source:MGI Symbol;Acc:MGI:3030549]
#INFO:	QUERY:	ENSMUSG00000087071	TRP73OS	transformation related protein 73, opposite strand [Source:MGI Symbol;Acc:MGI:3649248]
#INFO:	QUERY:	ENSMUSG00000090191	9230105E05RIK	RIKEN cDNA 9230105E05 gene [Source:MGI Symbol;Acc:MGI:2444388]
#INFO:	QUERY:	ENSMUSG00000030523	TRPM1	transient receptor potential cation channel, subfamily M, member 1 [Source:MGI Symbol;Acc:MGI:1330305]
#INFO:	QUERY:	ENSMUSG00000105456	GM43745	predicted gene 43745 [Source:MGI Symbol;Acc:MGI:5663882]
#INFO:	QUERY:	ENSMUSG00000109347	GM45175	predicted gene 45175 [Source:MGI Symbol;Acc:MGI:5753751]
#INFO:	QUERY:	ENSMUSG00000084004	GM12047	predicted gene 12047 [Source:MGI Symbol;Acc:MGI:3652082]
#INFO:	QUERY:	ENSMUSG00000079323	GM20661	predicted gene 20661 [Source:MGI Symbol;Acc:MGI:5313108]
#INFO:	QUERY:	ENSMUSG00000073953	OLFR596	olfactory receptor 596 [Source:MGI Symbol;Acc:MGI:3030430]
#INFO:	QUERY:	ENSMUSG00000021944	GATA4	GATA binding protein 4 [Source:MGI Symbol;Acc:MGI:95664]
#INFO:	QUERY:	ENSMUSG00000070550	MRGPRB4	MAS-related GPR, member B4 [Source:MGI Symbol;Acc:MGI:3033119]
#INFO:	QUERY:	ENSMUSG00000038011	DNAH10	dynein, axonemal, heavy chain 10 [Source:MGI Symbol;Acc:MGI:1860299]
#INFO:	QUERY:	ENSMUSG00000102979	GM37350	predicted gene, 37350 [Source:MGI Symbol;Acc:MGI:5610578]
#INFO:	QUERY:	ENSMUSG00000013415	IGF2BP1	insulin-like growth factor 2 mRNA binding protein 1 [Source:MGI Symbol;Acc:MGI:1890357]
#INFO:	QUERY:	ENSMUSG00000102424	PAUPAR	Pax6 upstream antisense RNA [Source:MGI Symbol;Acc:MGI:5543919]
#INFO:	QUERY:	ENSMUSG00000026832	CYTIP	cytohesin 1 interacting protein [Source:MGI Symbol;Acc:MGI:2183535]
#INFO:	QUERY:	ENSMUSG00000105782	GM42955	predicted gene 42955 [Source:MGI Symbol;Acc:MGI:5663092]
#INFO:	QUERY:	ENSMUSG00000070683	LACTBL1	lactamase, beta-like 1 [Source:MGI Symbol;Acc:MGI:2448566]
#INFO:	QUERY:	ENSMUSG00000021685	OTP	orthopedia homeobox [Source:MGI Symbol;Acc:MGI:99835]
#INFO:	QUERY:	ENSMUSG00000050763	OLFR1395	olfactory receptor 1395 [Source:MGI Symbol;Acc:MGI:3031229]
#INFO:	QUERY:	ENSMUSG00000094805	OLFR311	olfactory receptor 311 [Source:MGI Symbol;Acc:MGI:3030145]
#INFO:	QUERY:	ENSMUSG00000071656	LRRN4CL	LRRN4 C-terminal like [Source:MGI Symbol;Acc:MGI:1916102]
#INFO:	QUERY:	ENSMUSG00000059498	FCGR3	Fc receptor, IgG, low affinity III [Source:MGI Symbol;Acc:MGI:95500]
#INFO:	QUERY:	ENSMUSG00000098519	GM27166	predicted gene 27166 [Source:MGI Symbol;Acc:MGI:5521009]
#INFO:	QUERY:	ENSMUSG00000054005	MILL1	MHC I like leukocyte 1 [Source:MGI Symbol;Acc:MGI:2179988]
#INFO:	QUERY:	ENSMUSG00000038745	NLRP6	NLR family, pyrin domain containing 6 [Source:MGI Symbol;Acc:MGI:2141990]
#INFO:	QUERY:	ENSMUSG00000082176	GM13163	predicted gene 13163 [Source:MGI Symbol;Acc:MGI:3651199]
#INFO:	QUERY:	ENSMUSG00000050150	SLC9B1	solute carrier family 9, subfamily B (NHA1, cation proton antiporter 1), member 1 [Source:MGI Symbol;Acc:MGI:1921696]
#INFO:	QUERY:	ENSMUSG00000097748	GM26533	predicted gene, 26533 [Source:MGI Symbol;Acc:MGI:5477027]
#INFO:	QUERY:	ENSMUSG00000101918	OLFR1225	olfactory receptor 1225 [Source:MGI Symbol;Acc:MGI:3031059]
#INFO:	QUERY:	ENSMUSG00000087034	CBFA2T2-PS1	core-binding factor, runt domain, alpha subunit 2; translocated to, (human), pseudogene 1 [Source:MGI Symbol;Acc:MGI:1333788]
#INFO:	QUERY:	ENSMUSG00000048038	CCDC187	coiled-coil domain containing 187 [Source:MGI Symbol;Acc:MGI:3045295]
#INFO:	QUERY:	ENSMUSG00000029813	1600015I10RIK	RIKEN cDNA 1600015I10 gene [Source:MGI Symbol;Acc:MGI:1917011]
#INFO:	QUERY:	ENSMUSG00000048153	OLFR49	olfactory receptor 49 [Source:MGI Symbol;Acc:MGI:1333764]
#INFO:	QUERY:	ENSMUSG00000090457	4930571K23RIK	RIKEN cDNA 4930571K23 gene [Source:MGI Symbol;Acc:MGI:1923111]
#INFO:	QUERY:	ENSMUSG00000107619	GM32479	predicted gene, 32479 [Source:MGI Symbol;Acc:MGI:5591638]
#INFO:	QUERY:	ENSMUSG00000103223	GM37730	predicted gene, 37730 [Source:MGI Symbol;Acc:MGI:5610958]
#INFO:	QUERY:	ENSMUSG00000028071	SH2D2A	SH2 domain containing 2A [Source:MGI Symbol;Acc:MGI:1351596]
#INFO:	QUERY:	ENSMUSG00000045288	USH1G	USH1 protein network component sans [Source:MGI Symbol;Acc:MGI:2450757]
#INFO:	QUERY:	ENSMUSG00000022534	MEFV	Mediterranean fever [Source:MGI Symbol;Acc:MGI:1859396]
#INFO:	QUERY:	ENSMUSG00000029556	HNF1A	HNF1 homeobox A [Source:MGI Symbol;Acc:MGI:98504]
#INFO:	QUERY:	ENSMUSG00000106776	GM42646	predicted gene 42646 [Source:MGI Symbol;Acc:MGI:5662783]
#INFO:	QUERY:	ENSMUSG00000072624	GM5460	predicted gene 5460 [Source:MGI Symbol;Acc:MGI:3643519]
#INFO:	QUERY:	ENSMUSG00000095377	OLFR91	olfactory receptor 91 [Source:MGI Symbol;Acc:MGI:2177474]
#INFO:	QUERY:	ENSMUSG00000072387	GM10356	predicted gene 10356 [Source:MGI Symbol;Acc:MGI:3641761]
#INFO:	QUERY:	ENSMUSG00000037139	MYOM3	myomesin family, member 3 [Source:MGI Symbol;Acc:MGI:2685280]
#INFO:	QUERY:	ENSMUSG00000085887	ARHGAP27OS3	Rho GTPase activating protein 27, opposite strand 3 [Source:MGI Symbol;Acc:MGI:3650159]
#INFO:	QUERY:	ENSMUSG00000005677	NR1I3	nuclear receptor subfamily 1, group I, member 3 [Source:MGI Symbol;Acc:MGI:1346307]
#INFO:	QUERY:	ENSMUSG00000075599	SMOK3A	sperm motility kinase 3A [Source:MGI Symbol;Acc:MGI:3693943]
#INFO:	QUERY:	ENSMUSG00000030200	BCL2L14	BCL2-like 14 (apoptosis facilitator) [Source:MGI Symbol;Acc:MGI:1914063]
#INFO:	QUERY:	ENSMUSG00000099877	PINC	pregnancy induced noncoding RNA [Source:MGI Symbol;Acc:MGI:3623820]
#INFO:	QUERY:	ENSMUSG00000071540	3425401B19RIK	RIKEN cDNA 3425401B19 gene [Source:MGI Symbol;Acc:MGI:3588196]
#INFO:	QUERY:	ENSMUSG00000108864	GM44933	predicted gene 44933 [Source:MGI Symbol;Acc:MGI:5753509]
#INFO:	QUERY:	ENSMUSG00000048992	PRSS32	protease, serine 32 [Source:MGI Symbol;Acc:MGI:1917064]
#INFO:	QUERY:	ENSMUSG00000097387	4930563E18RIK	RIKEN cDNA 4930563E18 gene [Source:MGI Symbol;Acc:MGI:1922620]
#INFO:	QUERY:	ENSMUSG00000092094	ZFP804B	zinc finger protein 804B [Source:MGI Symbol;Acc:MGI:2685287]
#INFO:	QUERY:	ENSMUSG00000106358	GM7047	predicted gene 7047 [Source:MGI Symbol;Acc:MGI:3643011]
#INFO:	QUERY:	ENSMUSG00000100119	2700089I24RIK	RIKEN cDNA 2700089I24 gene [Source:MGI Symbol;Acc:MGI:1919897]
#INFO:	QUERY:	ENSMUSG00000092458	GM18737	predicted gene, 18737 [Source:MGI Symbol;Acc:MGI:5010922]
#INFO:	QUERY:	ENSMUSG00000034452	SLC24A1	solute carrier family 24 (sodium/potassium/calcium exchanger), member 1 [Source:MGI Symbol;Acc:MGI:2384871]
#INFO:	QUERY:	ENSMUSG00000020481	ANKRD36	ankyrin repeat domain 36 [Source:MGI Symbol;Acc:MGI:1923639]
#INFO:	QUERY:	ENSMUSG00000096257	CCER2	coiled-coil glutamate-rich protein 2 [Source:MGI Symbol;Acc:MGI:3645242]
#INFO:	QUERY:	ENSMUSG00000027788	OTOL1	otolin 1 [Source:MGI Symbol;Acc:MGI:2685260]
#INFO:	QUERY:	ENSMUSG00000092561	GM4011	predicted gene 4011 [Source:MGI Symbol;Acc:MGI:3782185]
#INFO:	QUERY:	ENSMUSG00000029923	RAB19	RAB19, member RAS oncogene family [Source:MGI Symbol;Acc:MGI:103292]
#INFO:	QUERY:	ENSMUSG00000102570	GM37968	predicted gene, 37968 [Source:MGI Symbol;Acc:MGI:5611196]
#INFO:	QUERY:	ENSMUSG00000060198	GM11353	predicted gene 11353 [Source:MGI Symbol;Acc:MGI:3649794]
#INFO:	QUERY:	ENSMUSG00000052303	MRGPRA6	MAS-related GPR, member A6 [Source:MGI Symbol;Acc:MGI:3033107]
#INFO:	QUERY:	ENSMUSG00000062036	4932415M13RIK	RIKEN cDNA 4932415M13 gene [Source:MGI Symbol;Acc:MGI:3608328]
#INFO:	QUERY:	ENSMUSG00000102418	SH2D1B1	SH2 domain containing 1B1 [Source:MGI Symbol;Acc:MGI:1349420]
#INFO:	QUERY:	ENSMUSG00000070375	OLFR406	olfactory receptor 406 [Source:MGI Symbol;Acc:MGI:3030240]
#INFO:	QUERY:	ENSMUSG00000028940	HES2	hairy and enhancer of split 2 (Drosophila) [Source:MGI Symbol;Acc:MGI:1098624]
#INFO:	QUERY:	ENSMUSG00000083979	GM12527	predicted gene 12527 [Source:MGI Symbol;Acc:MGI:3651542]
#INFO:	QUERY:	ENSMUSG00000049797	OLFR642	olfactory receptor 642 [Source:MGI Symbol;Acc:MGI:3030476]
#INFO:	QUERY:	ENSMUSG00000102599	GM38386	predicted gene, 38386 [Source:MGI Symbol;Acc:MGI:5611614]
#INFO:	QUERY:	ENSMUSG00000079042	APELA	apelin receptor early endogenous ligand [Source:MGI Symbol;Acc:MGI:3642370]
#INFO:	QUERY:	ENSMUSG00000041945	MFSD9	major facilitator superfamily domain containing 9 [Source:MGI Symbol;Acc:MGI:2443548]
#INFO:	QUERY:	ENSMUSG00000061952	OLFR1377	olfactory receptor 1377 [Source:MGI Symbol;Acc:MGI:3031211]
#INFO:	QUERY:	ENSMUSG00000041247	LAMP3	lysosomal-associated membrane protein 3 [Source:MGI Symbol;Acc:MGI:2441659]
#INFO:	QUERY:	ENSMUSG00000085889	1700054M17RIK	RIKEN cDNA 1700054M17 gene [Source:MGI Symbol;Acc:MGI:1920608]
#INFO:	QUERY:	ENSMUSG00000107064	GM42561	predicted gene 42561 [Source:MGI Symbol;Acc:MGI:5662698]
#INFO:	QUERY:	ENSMUSG00000043282	TEDDM1B	transmembrane epididymal protein 1B [Source:MGI Symbol;Acc:MGI:3646829]
#INFO:	QUERY:	ENSMUSG00000096918	GM16863	predicted gene, 16863 [Source:MGI Symbol;Acc:MGI:4439787]
#INFO:	QUERY:	ENSMUSG00000099765	GM4454	predicted gene 4454 [Source:MGI Symbol;Acc:MGI:3782638]
#INFO:	QUERY:	ENSMUSG00000025574	TK1	thymidine kinase 1 [Source:MGI Symbol;Acc:MGI:98763]
#INFO:	QUERY:	ENSMUSG00000020542	MYOCD	myocardin [Source:MGI Symbol;Acc:MGI:2137495]
#INFO:	QUERY:	ENSMUSG00000054310	OBOX1	oocyte specific homeobox 1 [Source:MGI Symbol;Acc:MGI:1918718]
#INFO:	QUERY:	ENSMUSG00000021553	SLC28A3	solute carrier family 28 (sodium-coupled nucleoside transporter), member 3 [Source:MGI Symbol;Acc:MGI:2137361]
#INFO:	QUERY:	ENSMUSG00000063116	OLFR410	olfactory receptor 410 [Source:MGI Symbol;Acc:MGI:3030244]
#INFO:	QUERY:	ENSMUSG00000009588	ST6GALNAC1	ST6 (alpha-N-acetyl-neuraminyl-2,3-beta-galactosyl-1,3)-N-acetylgalactosaminide alpha-2,6-sialyltransferase 1 [Source:MGI Symbol;Acc:MGI:1341826]
#INFO:	QUERY:	ENSMUSG00000106875	GM43093	predicted gene 43093 [Source:MGI Symbol;Acc:MGI:5663230]
#INFO:	QUERY:	ENSMUSG00000056699	GM5533	predicted gene 5533 [Source:MGI Symbol;Acc:MGI:3647595]
#INFO:	QUERY:	ENSMUSG00000096802	GM15433	predicted pseudogene 15433 [Source:MGI Symbol;Acc:MGI:3705860]
#INFO:	QUERY:	ENSMUSG00000106887	A930005G22RIK	RIKEN cDNA A930005G22 gene [Source:MGI Symbol;Acc:MGI:3528178]
#INFO:	QUERY:	ENSMUSG00000075067	OLFR1269	olfactory receptor 1269 [Source:MGI Symbol;Acc:MGI:3031103]
#INFO:	QUERY:	ENSMUSG00000099560	MRGPRX3-PS	MAS-related GPR, member X3, pseudogene [Source:MGI Symbol;Acc:MGI:2685506]
#INFO:	QUERY:	ENSMUSG00000030205	GPRC5D	G protein-coupled receptor, family C, group 5, member D [Source:MGI Symbol;Acc:MGI:1935037]
#INFO:	QUERY:	ENSMUSG00000108436	GM44851	predicted gene 44851 [Source:MGI Symbol;Acc:MGI:5753427]
#INFO:	QUERY:	ENSMUSG00000095276	GFY	golgi-associated olfactory signaling regulator [Source:MGI Symbol;Acc:MGI:2685427]
#INFO:	QUERY:	ENSMUSG00000037974	MUC5AC	mucin 5, subtypes A and C, tracheobronchial/gastric [Source:MGI Symbol;Acc:MGI:104697]
#INFO:	QUERY:	ENSMUSG00000101953	GM29241	predicted gene 29241 [Source:MGI Symbol;Acc:MGI:5579947]
#INFO:	QUERY:	ENSMUSG00000101643	GM28307	predicted gene 28307 [Source:MGI Symbol;Acc:MGI:5579013]
#INFO:	QUERY:	ENSMUSG00000106647	GM42523	predicted gene 42523 [Source:MGI Symbol;Acc:MGI:5662660]
#INFO:	QUERY:	ENSMUSG00000085747	SLC13A2OS	solute carrier family 13 (sodium-dependent dicarboxylate transporter), member 2, opposite strand [Source:MGI Symbol;Acc:MGI:3649278]
#INFO:	QUERY:	ENSMUSG00000097065	A630075F10RIK	RIKEN cDNA A630075F10 gene [Source:MGI Symbol;Acc:MGI:3604957]
#INFO:	QUERY:	ENSMUSG00000083258	GM5939	predicted pseudogene 5939 [Source:MGI Symbol;Acc:MGI:3648845]
#INFO:	QUERY:	ENSMUSG00000055704	GM9978	predicted gene 9978 [Source:MGI Symbol;Acc:MGI:3641806]
#INFO:	QUERY:	ENSMUSG00000052075	1700029F12RIK	RIKEN cDNA 1700029F12 gene [Source:MGI Symbol;Acc:MGI:1913729]
#INFO:	QUERY:	ENSMUSG00000073739	GM16287	predicted gene 16287 [Source:MGI Symbol;Acc:MGI:3650322]
#INFO:	QUERY:	ENSMUSG00000059610	OLFR222	olfactory receptor 222 [Source:MGI Symbol;Acc:MGI:3030056]
#INFO:	QUERY:	ENSMUSG00000087326	GM12503	predicted gene 12503 [Source:MGI Symbol;Acc:MGI:3651570]
#INFO:	QUERY:	ENSMUSG00000081303	GM16011	predicted gene 16011 [Source:MGI Symbol;Acc:MGI:3801796]
#INFO:	QUERY:	ENSMUSG00000030830	ITGAL	integrin alpha L [Source:MGI Symbol;Acc:MGI:96606]
#INFO:	QUERY:	ENSMUSG00000093592	VMN2R-PS122	vomeronasal 2, receptor, pseudogene 122 [Source:MGI Symbol;Acc:MGI:3761606]
#INFO:	QUERY:	ENSMUSG00000090104	SLMAPOS2	sarcolemma associated protein, opposite strand transcript 2 [Source:MGI Symbol;Acc:MGI:3801907]
#INFO:	QUERY:	ENSMUSG00000066368	ACTL11	actin-like 11 [Source:MGI Symbol;Acc:MGI:1914972]
#INFO:	QUERY:	ENSMUSG00000103662	GM34294	predicted gene, 34294 [Source:MGI Symbol;Acc:MGI:5593453]
#INFO:	QUERY:	ENSMUSG00000105516	GM36823	predicted gene, 36823 [Source:MGI Symbol;Acc:MGI:5595982]
#INFO:	QUERY:	ENSMUSG00000067594	KRT77	keratin 77 [Source:MGI Symbol;Acc:MGI:3588209]
#INFO:	QUERY:	ENSMUSG00000087084	GM13016	predicted gene 13016 [Source:MGI Symbol;Acc:MGI:3650527]
#INFO:	QUERY:	ENSMUSG00000086733	GM11685	predicted gene 11685 [Source:MGI Symbol;Acc:MGI:3651603]
#INFO:	QUERY:	ENSMUSG00000090146	4930405H06RIK	RIKEN cDNA 4930405H06 gene [Source:MGI Symbol;Acc:MGI:1921068]
#INFO:	QUERY:	ENSMUSG00000023433	CELA3B	chymotrypsin-like elastase family, member 3B [Source:MGI Symbol;Acc:MGI:1915118]
#INFO:	QUERY:	ENSMUSG00000035560	WDR20RT	WD repeat domain 20, retrogene [Source:MGI Symbol;Acc:MGI:1918198]
#INFO:	QUERY:	ENSMUSG00000070498	TMEM132B	transmembrane protein 132B [Source:MGI Symbol;Acc:MGI:3609245]
#INFO:	QUERY:	ENSMUSG00000109388	GM44688	predicted gene 44688 [Source:MGI Symbol;Acc:MGI:5753264]
#INFO:	QUERY:	ENSMUSG00000046717	IGBP1B	immunoglobulin (CD79A) binding protein 1b [Source:MGI Symbol;Acc:MGI:1354380]
#INFO:	QUERY:	ENSMUSG00000073375	LRRC30	leucine rich repeat containing 30 [Source:MGI Symbol;Acc:MGI:2685172]
#INFO:	QUERY:	ENSMUSG00000029707	FSCN3	fascin actin-bundling protein 3 [Source:MGI Symbol;Acc:MGI:1890386]
#INFO:	QUERY:	ENSMUSG00000097220	GM26599	predicted gene, 26599 [Source:MGI Symbol;Acc:MGI:5477093]
#INFO:	QUERY:	ENSMUSG00000020090	NPFFR1	neuropeptide FF receptor 1 [Source:MGI Symbol;Acc:MGI:2685082]
#INFO:	QUERY:	ENSMUSG00000041538	H2-OB	histocompatibility 2, O region beta locus [Source:MGI Symbol;Acc:MGI:95925]
#INFO:	QUERY:	ENSMUSG00000049168	OLFR449	olfactory receptor 449 [Source:MGI Symbol;Acc:MGI:3030283]
#INFO:	QUERY:	ENSMUSG00000090958	LRRC32	leucine rich repeat containing 32 [Source:MGI Symbol;Acc:MGI:93882]
#INFO:	QUERY:	ENSMUSG00000097160	A630072L19RIK	RIKEN cDNA A630072L19 gene [Source:MGI Symbol;Acc:MGI:3641830]
#INFO:	QUERY:	ENSMUSG00000056306	SERTM1	serine rich and transmembrane domain containing 1 [Source:MGI Symbol;Acc:MGI:3607715]
#INFO:	QUERY:	ENSMUSG00000075085	OLFR1242	olfactory receptor 1242 [Source:MGI Symbol;Acc:MGI:3031076]
#INFO:	QUERY:	ENSMUSG00000038805	SIX3	sine oculis-related homeobox 3 [Source:MGI Symbol;Acc:MGI:102764]
#INFO:	QUERY:	ENSMUSG00000104774	GM8920	predicted gene 8920 [Source:MGI Symbol;Acc:MGI:3643680]
#INFO:	QUERY:	ENSMUSG00000059173	PDE1A	phosphodiesterase 1A, calmodulin-dependent [Source:MGI Symbol;Acc:MGI:1201792]
#INFO:	QUERY:	ENSMUSG00000081863	GM12780	predicted gene 12780 [Source:MGI Symbol;Acc:MGI:3649896]
#INFO:	QUERY:	ENSMUSG00000108930	GM10648	predicted gene 10648 [Source:MGI Symbol;Acc:MGI:3642037]
#INFO:	QUERY:	ENSMUSG00000107572	GM3961	predicted gene 3961 [Source:MGI Symbol;Acc:MGI:3782135]
#INFO:	QUERY:	ENSMUSG00000082461	GM8844	predicted gene 8844 [Source:MGI Symbol;Acc:MGI:3644372]
#INFO:	QUERY:	ENSMUSG00000029032	ARHGEF16	Rho guanine nucleotide exchange factor (GEF) 16 [Source:MGI Symbol;Acc:MGI:2446219]
#INFO:	QUERY:	ENSMUSG00000022831	HCLS1	hematopoietic cell specific Lyn substrate 1 [Source:MGI Symbol;Acc:MGI:104568]
#INFO:	QUERY:	ENSMUSG00000101532	ZBED4-PS1	zinc finger, BED type containing 4, pseudogene 1 [Source:MGI Symbol;Acc:MGI:3645416]
#INFO:	QUERY:	ENSMUSG00000085511	GM11738	predicted gene 11738 [Source:MGI Symbol;Acc:MGI:3650365]
#INFO:	QUERY:	ENSMUSG00000108507	6720469O03RIK	RIKEN cDNA 6720469O03 gene [Source:MGI Symbol;Acc:MGI:1924988]
#INFO:	QUERY:	ENSMUSG00000101222	GM28315	predicted gene 28315 [Source:MGI Symbol;Acc:MGI:5579021]
#INFO:	QUERY:	ENSMUSG00000063594	GNG8	guanine nucleotide binding protein (G protein), gamma 8 [Source:MGI Symbol;Acc:MGI:109163]
#INFO:	QUERY:	ENSMUSG00000070691	RUNX3	runt related transcription factor 3 [Source:MGI Symbol;Acc:MGI:102672]
#INFO:	QUERY:	ENSMUSG00000000126	WNT9A	wingless-type MMTV integration site family, member 9A [Source:MGI Symbol;Acc:MGI:2446084]
#INFO:	QUERY:	ENSMUSG00000083886	OLFR409-PS1	olfactory receptor 409, pseudogene 1 [Source:MGI Symbol;Acc:MGI:3030243]
#INFO:	QUERY:	ENSMUSG00000083178	GM12187	predicted gene 12187 [Source:MGI Symbol;Acc:MGI:3651944]
#INFO:	QUERY:	ENSMUSG00000045075	GM9796	predicted gene 9796 [Source:MGI Symbol;Acc:MGI:3648412]
#INFO:	QUERY:	ENSMUSG00000000817	FASL	Fas ligand (TNF superfamily, member 6) [Source:MGI Symbol;Acc:MGI:99255]
#INFO:	QUERY:	ENSMUSG00000059473	OLFR979	olfactory receptor 979 [Source:MGI Symbol;Acc:MGI:3030813]
#INFO:	QUERY:	ENSMUSG00000030468	SIGLECG	sialic acid binding Ig-like lectin G [Source:MGI Symbol;Acc:MGI:2443630]
#INFO:	QUERY:	ENSMUSG00000005917	OTX1	orthodenticle homeobox 1 [Source:MGI Symbol;Acc:MGI:97450]
#INFO:	QUERY:	ENSMUSG00000049625	TIFAB	TRAF-interacting protein with forkhead-associated domain, family member B [Source:MGI Symbol;Acc:MGI:2385852]
#INFO:	QUERY:	ENSMUSG00000029205	CHRNA9	cholinergic receptor, nicotinic, alpha polypeptide 9 [Source:MGI Symbol;Acc:MGI:1202403]
#INFO:	QUERY:	ENSMUSG00000019942	CDK1	cyclin-dependent kinase 1 [Source:MGI Symbol;Acc:MGI:88351]
#INFO:	QUERY:	ENSMUSG00000041789	2700046A07RIK	RIKEN cDNA 2700046A07 gene [Source:MGI Symbol;Acc:MGI:1919803]
#INFO:	QUERY:	ENSMUSG00000055198	GM12830	predicted gene 12830 [Source:MGI Symbol;Acc:MGI:3649998]
#INFO:	QUERY:	ENSMUSG00000083898	GM7340	predicted gene 7340 [Source:MGI Symbol;Acc:MGI:3648496]
#INFO:	QUERY:	ENSMUSG00000085399	FOXD2OS	forkhead box D2, opposite strand [Source:MGI Symbol;Acc:MGI:2444065]
#INFO:	QUERY:	ENSMUSG00000050818	OLFR330	olfactory receptor 330 [Source:MGI Symbol;Acc:MGI:3030164]
#INFO:	QUERY:	ENSMUSG00000078815	CACNG6	calcium channel, voltage-dependent, gamma subunit 6 [Source:MGI Symbol;Acc:MGI:1859168]
#INFO:	QUERY:	ENSMUSG00000097002	GM2670	predicted gene 2670 [Source:MGI Symbol;Acc:MGI:3780839]
#INFO:	QUERY:	ENSMUSG00000108220	GM44056	predicted gene, 44056 [Source:MGI Symbol;Acc:MGI:5690448]
#INFO:	QUERY:	ENSMUSG00000026770	IL2RA	interleukin 2 receptor, alpha chain [Source:MGI Symbol;Acc:MGI:96549]
#INFO:	QUERY:	ENSMUSG00000095996	GM16513	predicted gene, Gm16513 [Source:MGI Symbol;Acc:MGI:2141041]
#INFO:	QUERY:	ENSMUSG00000044205	OLFR983	olfactory receptor 983 [Source:MGI Symbol;Acc:MGI:3030817]
#INFO:	QUERY:	ENSMUSG00000029564	4930519G04RIK	RIKEN cDNA 4930519G04 gene [Source:MGI Symbol;Acc:MGI:1914843]
#INFO:	QUERY:	ENSMUSG00000099398	MS4A14	membrane-spanning 4-domains, subfamily A, member 14 [Source:MGI Symbol;Acc:MGI:2686122]
#INFO:	QUERY:	ENSMUSG00000006056	CALCOCO2	calcium binding and coiled-coil domain 2 [Source:MGI Symbol;Acc:MGI:1343177]
#INFO:	QUERY:	ENSMUSG00000102017	GM6124	predicted gene 6124 [Source:MGI Symbol;Acc:MGI:3779556]
#INFO:	QUERY:	ENSMUSG00000075143	OLFR1157	olfactory receptor 1157 [Source:MGI Symbol;Acc:MGI:3030991]
#INFO:	QUERY:	ENSMUSG00000001027	SCN4A	sodium channel, voltage-gated, type IV, alpha [Source:MGI Symbol;Acc:MGI:98250]
#INFO:	QUERY:	ENSMUSG00000078531	GM831	predicted gene 831 [Source:MGI Symbol;Acc:MGI:2685677]
#INFO:	QUERY:	ENSMUSG00000104350	GM38244	predicted gene, 38244 [Source:MGI Symbol;Acc:MGI:5611472]
#INFO:	QUERY:	ENSMUSG00000100632	9430060I03RIK	RIKEN cDNA 9430060I03 gene [Source:MGI Symbol;Acc:MGI:3702484]
#INFO:	QUERY:	ENSMUSG00000040498	IGSF23	immunoglobulin superfamily, member 23 [Source:MGI Symbol;Acc:MGI:1917330]
#INFO:	QUERY:	ENSMUSG00000054940	OLFR137	olfactory receptor 137 [Source:MGI Symbol;Acc:MGI:2177520]
#INFO:	QUERY:	ENSMUSG00000091656	VMN2R106	vomeronasal 2, receptor 106 [Source:MGI Symbol;Acc:MGI:3647787]
#INFO:	QUERY:	ENSMUSG00000102665	GM38379	predicted gene, 38379 [Source:MGI Symbol;Acc:MGI:5611607]
#INFO:	QUERY:	ENSMUSG00000032661	OAS3	2'-5' oligoadenylate synthetase 3 [Source:MGI Symbol;Acc:MGI:2180850]
#INFO:	QUERY:	ENSMUSG00000084980	SLC36A1OS	solute carrier family 36 (proton/amino acid symporter), member 1, opposite strand [Source:MGI Symbol;Acc:MGI:1921295]
#INFO:	QUERY:	ENSMUSG00000075025	GM10804	predicted gene 10804 [Source:MGI Symbol;Acc:MGI:3641755]
#INFO:	QUERY:	ENSMUSG00000092204	VMN2R-PS49	vomeronasal 2, receptor, pseudogene 49 [Source:MGI Symbol;Acc:MGI:3757889]
#INFO:	QUERY:	ENSMUSG00000073414	G6B	immunoreceptor tyrosine-based inhibitory motif (ITIM) containing platelet receptor [Source:MGI Symbol;Acc:MGI:2146995]
#INFO:	QUERY:	ENSMUSG00000075591	GM10874	predicted gene 10874 [Source:MGI Symbol;Acc:MGI:3704261]
#INFO:	QUERY:	ENSMUSG00000090675	OLFR111	olfactory receptor 111 [Source:MGI Symbol;Acc:MGI:2177494]
#INFO:	QUERY:	ENSMUSG00000102838	GM37014	predicted gene, 37014 [Source:MGI Symbol;Acc:MGI:5610242]
#INFO:	QUERY:	ENSMUSG00000056055	SAG	S-antigen, retina and pineal gland (arrestin) [Source:MGI Symbol;Acc:MGI:98227]
#INFO:	QUERY:	ENSMUSG00000041498	KIF14	kinesin family member 14 [Source:MGI Symbol;Acc:MGI:1098226]
#INFO:	QUERY:	ENSMUSG00000103927	GM9932	predicted gene 9932 [Source:MGI Symbol;Acc:MGI:3642594]
#INFO:	QUERY:	ENSMUSG00000031103	ELF4	E74-like factor 4 (ets domain transcription factor) [Source:MGI Symbol;Acc:MGI:1928377]
#INFO:	QUERY:	ENSMUSG00000090157	GM16534	predicted gene 16534 [Source:MGI Symbol;Acc:MGI:4413442]
#INFO:	QUERY:	ENSMUSG00000096546	SMLR1	small leucine-rich protein 1 [Source:MGI Symbol;Acc:MGI:1922856]
#INFO:	QUERY:	ENSMUSG00000079278	TMEM233	transmembrane protein 233 [Source:MGI Symbol;Acc:MGI:3651514]
#INFO:	QUERY:	ENSMUSG00000027463	SLC52A3	solute carrier protein family 52, member 3 [Source:MGI Symbol;Acc:MGI:1916948]
#INFO:	QUERY:	ENSMUSG00000089984	FBXO24	F-box protein 24 [Source:MGI Symbol;Acc:MGI:1918426]
#INFO:	QUERY:	ENSMUSG00000037411	SERPINE1	serine (or cysteine) peptidase inhibitor, clade E, member 1 [Source:MGI Symbol;Acc:MGI:97608]
#INFO:	QUERY:	ENSMUSG00000032128	ROBO3	roundabout guidance receptor 3 [Source:MGI Symbol;Acc:MGI:1343102]
#INFO:	QUERY:	ENSMUSG00000022432	SMC1B	structural maintenance of chromosomes 1B [Source:MGI Symbol;Acc:MGI:2154049]
#INFO:	QUERY:	ENSMUSG00000095360	GM3594	predicted gene 3594 [Source:MGI Symbol;Acc:MGI:3781771]
#INFO:	QUERY:	ENSMUSG00000041605	5730559C18RIK	RIKEN cDNA 5730559C18 gene [Source:MGI Symbol;Acc:MGI:1921579]
#INFO:	QUERY:	ENSMUSG00000105403	GM43618	predicted gene 43618 [Source:MGI Symbol;Acc:MGI:5663755]
#INFO:	QUERY:	ENSMUSG00000108410	GM44740	predicted gene 44740 [Source:MGI Symbol;Acc:MGI:5753316]
#INFO:	QUERY:	ENSMUSG00000086584	GM12002	predicted gene 12002 [Source:MGI Symbol;Acc:MGI:3651521]
#INFO:	QUERY:	ENSMUSG00000027670	OCSTAMP	osteoclast stimulatory transmembrane protein [Source:MGI Symbol;Acc:MGI:1921864]
#INFO:	QUERY:	ENSMUSG00000012042	4930579F01RIK	RIKEN cDNA 4930579F01 gene [Source:MGI Symbol;Acc:MGI:1914991]
#INFO:	QUERY:	ENSMUSG00000044948	CFAP43	cilia and flagella associated protein 43 [Source:MGI Symbol;Acc:MGI:1289258]
#INFO:	QUERY:	ENSMUSG00000066269	OLFR575	olfactory receptor 575 [Source:MGI Symbol;Acc:MGI:3030409]
#INFO:	QUERY:	ENSMUSG00000078506	GM13124	predicted gene 13124 [Source:MGI Symbol;Acc:MGI:3652194]
#INFO:	QUERY:	ENSMUSG00000082262	GM14730	predicted gene 14730 [Source:MGI Symbol;Acc:MGI:3705542]
#INFO:	QUERY:	ENSMUSG00000103040	GM37304	predicted gene, 37304 [Source:MGI Symbol;Acc:MGI:5610532]
#INFO:	QUERY:	ENSMUSG00000028001	FGA	fibrinogen alpha chain [Source:MGI Symbol;Acc:MGI:1316726]
#INFO:	QUERY:	ENSMUSG00000019992	MTFR2	mitochondrial fission regulator 2 [Source:MGI Symbol;Acc:MGI:1919054]
#INFO:	QUERY:	ENSMUSG00000028871	RSPO1	R-spondin 1 [Source:MGI Symbol;Acc:MGI:2183426]
#INFO:	QUERY:	ENSMUSG00000046687	GM5424	predicted gene 5424 [Source:MGI Symbol;Acc:MGI:3643173]
#INFO:	QUERY:	ENSMUSG00000062585	CNR2	cannabinoid receptor 2 (macrophage) [Source:MGI Symbol;Acc:MGI:104650]
#INFO:	QUERY:	ENSMUSG00000100021	GM18697	predicted gene, 18697 [Source:MGI Symbol;Acc:MGI:5010882]
#INFO:	QUERY:	ENSMUSG00000087137	4930509K18RIK	RIKEN cDNA 4930509K18 gene [Source:MGI Symbol;Acc:MGI:1923069]
#INFO:	QUERY:	ENSMUSG00000051758	4930544M13RIK	RIKEN cDNA 4930544M13 gene [Source:MGI Symbol;Acc:MGI:1922411]
#INFO:	QUERY:	ENSMUSG00000070821	OLFR1340	olfactory receptor 1340 [Source:MGI Symbol;Acc:MGI:3031174]
#INFO:	QUERY:	ENSMUSG00000061062	GM10093	predicted pseudogene 10093 [Source:MGI Symbol;Acc:MGI:3704479]
#INFO:	QUERY:	ENSMUSG00000086289	GM16933	predicted gene, 16933 [Source:MGI Symbol;Acc:MGI:4439857]
#INFO:	QUERY:	ENSMUSG00000046922	GPR6	G protein-coupled receptor 6 [Source:MGI Symbol;Acc:MGI:2155249]
#INFO:	QUERY:	ENSMUSG00000101875	GM6028	predicted gene 6028 [Source:MGI Symbol;Acc:MGI:3648170]
#INFO:	QUERY:	ENSMUSG00000017652	CD40	CD40 antigen [Source:MGI Symbol;Acc:MGI:88336]
#INFO:	QUERY:	ENSMUSG00000097281	GM26685	predicted gene, 26685 [Source:MGI Symbol;Acc:MGI:5477179]
#INFO:	QUERY:	ENSMUSG00000095194	OLFR936	olfactory receptor 936 [Source:MGI Symbol;Acc:MGI:3030770]
#INFO:	QUERY:	ENSMUSG00000082217	GM1401	predicted gene 1401 [Source:MGI Symbol;Acc:MGI:2686247]
#INFO:	QUERY:	ENSMUSG00000020599	RGS9	regulator of G-protein signaling 9 [Source:MGI Symbol;Acc:MGI:1338824]
#INFO:	QUERY:	ENSMUSG00000109176	ZFP264	zinc finger protein 264 [Source:MGI Symbol;Acc:MGI:2151059]
#INFO:	QUERY:	ENSMUSG00000064044	OLFR319	olfactory receptor 319 [Source:MGI Symbol;Acc:MGI:3030153]
#INFO:	QUERY:	ENSMUSG00000038115	ANO2	anoctamin 2 [Source:MGI Symbol;Acc:MGI:2387214]
#INFO:	QUERY:	ENSMUSG00000023176	CPN2	carboxypeptidase N, polypeptide 2 [Source:MGI Symbol;Acc:MGI:1919006]
#INFO:	QUERY:	ENSMUSG00000066108	MUC5B	mucin 5, subtype B, tracheobronchial [Source:MGI Symbol;Acc:MGI:1921430]
#INFO:	QUERY:	ENSMUSG00000019230	LHX9	LIM homeobox protein 9 [Source:MGI Symbol;Acc:MGI:1316721]
#INFO:	QUERY:	ENSMUSG00000039304	TNFSF10	tumor necrosis factor (ligand) superfamily, member 10 [Source:MGI Symbol;Acc:MGI:107414]
#INFO:	QUERY:	ENSMUSG00000090981	OLFR718-PS1	olfactory receptor 718, pseudogene 1 [Source:MGI Symbol;Acc:MGI:3030552]
#INFO:	QUERY:	ENSMUSG00000097194	9330175E14RIK	RIKEN cDNA 9330175E14 gene [Source:MGI Symbol;Acc:MGI:2443913]
#INFO:	QUERY:	ENSMUSG00000026564	DUSP27	dual specificity phosphatase 27 (putative) [Source:MGI Symbol;Acc:MGI:2685055]
#INFO:	QUERY:	ENSMUSG00000039963	CCDC40	coiled-coil domain containing 40 [Source:MGI Symbol;Acc:MGI:2443893]
#INFO:	QUERY:	ENSMUSG00000091618	H60C	histocompatibility 60c [Source:MGI Symbol;Acc:MGI:3774845]
#INFO:	QUERY:	ENSMUSG00000033581	IGF2BP2	insulin-like growth factor 2 mRNA binding protein 2 [Source:MGI Symbol;Acc:MGI:1890358]
#INFO:	QUERY:	ENSMUSG00000023978	PRPH2	peripherin 2 [Source:MGI Symbol;Acc:MGI:102791]
#INFO:	QUERY:	ENSMUSG00000082325	GM12642	predicted gene 12642 [Source:MGI Symbol;Acc:MGI:3649275]
#INFO:	QUERY:	ENSMUSG00000037336	MFSD2B	major facilitator superfamily domain containing 2B [Source:MGI Symbol;Acc:MGI:3583946]
#INFO:	QUERY:	ENSMUSG00000083270	GM13498	predicted gene 13498 [Source:MGI Symbol;Acc:MGI:3650381]
#INFO:	QUERY:	ENSMUSG00000078776	9530053A07RIK	RIKEN cDNA 9530053A07 gene [Source:MGI Symbol;Acc:MGI:2442118]
#INFO:	QUERY:	ENSMUSG00000091059	VMN2R14	vomeronasal 2, receptor 14 [Source:MGI Symbol;Acc:MGI:3649151]
#INFO:	QUERY:	ENSMUSG00000073977	OLFR549	olfactory receptor 549 [Source:MGI Symbol;Acc:MGI:3030383]
#INFO:	QUERY:	ENSMUSG00000001333	SYNC	syncoilin [Source:MGI Symbol;Acc:MGI:1916078]
#INFO:	QUERY:	ENSMUSG00000090293	GM17034	predicted gene 17034 [Source:MGI Symbol;Acc:MGI:4937861]
#INFO:	QUERY:	ENSMUSG00000055471	ALK	anaplastic lymphoma kinase [Source:MGI Symbol;Acc:MGI:103305]
#INFO:	QUERY:	ENSMUSG00000086188	GM15169	predicted gene 15169 [Source:MGI Symbol;Acc:MGI:3705215]
#INFO:	QUERY:	ENSMUSG00000024215	SPDEF	SAM pointed domain containing ets transcription factor [Source:MGI Symbol;Acc:MGI:1353422]
#INFO:	QUERY:	ENSMUSG00000101803	GM28419	predicted gene 28419 [Source:MGI Symbol;Acc:MGI:5579125]
#INFO:	QUERY:	ENSMUSG00000090486	BC035947	cDNA sequence BC035947 [Source:MGI Symbol;Acc:MGI:2652858]
#INFO:	QUERY:	ENSMUSG00000069036	SRY	sex determining region of Chr Y [Source:MGI Symbol;Acc:MGI:98660]
#INFO:	QUERY:	ENSMUSG00000089645	GM5766	predicted gene 5766 [Source:MGI Symbol;Acc:MGI:3643508]
#INFO:	QUERY:	ENSMUSG00000103479	GM37698	predicted gene, 37698 [Source:MGI Symbol;Acc:MGI:5610926]
#INFO:	QUERY:	ENSMUSG00000108613	GM36694	predicted gene, 36694 [Source:MGI Symbol;Acc:MGI:5595853]
#INFO:	QUERY:	ENSMUSG00000048126	COL6A3	collagen, type VI, alpha 3 [Source:MGI Symbol;Acc:MGI:88461]
#INFO:	QUERY:	ENSMUSG00000102460	GM38197	predicted gene, 38197 [Source:MGI Symbol;Acc:MGI:5611425]
#INFO:	QUERY:	ENSMUSG00000071361	MCPT9	mast cell protease 9 [Source:MGI Symbol;Acc:MGI:1194491]
#INFO:	QUERY:	ENSMUSG00000032243	ITGA11	integrin alpha 11 [Source:MGI Symbol;Acc:MGI:2442114]
#INFO:	QUERY:	ENSMUSG00000086868	GM15883	predicted gene 15883 [Source:MGI Symbol;Acc:MGI:3801875]
#INFO:	QUERY:	ENSMUSG00000103705	4930518J20RIK	RIKEN cDNA 4930518J20 gene [Source:MGI Symbol;Acc:MGI:1914839]
#INFO:	QUERY:	ENSMUSG00000108239	GM19434	predicted gene, 19434 [Source:MGI Symbol;Acc:MGI:5011619]
#INFO:	QUERY:	ENSMUSG00000020826	NOS2	nitric oxide synthase 2, inducible [Source:MGI Symbol;Acc:MGI:97361]
#INFO:	QUERY:	ENSMUSG00000084113	GM14277	predicted gene 14277 [Source:MGI Symbol;Acc:MGI:3650350]
#INFO:	QUERY:	ENSMUSG00000026354	LCT	lactase [Source:MGI Symbol;Acc:MGI:104576]
#INFO:	QUERY:	ENSMUSG00000078487	ANKRD65	ankyrin repeat domain 65 [Source:MGI Symbol;Acc:MGI:2685285]
#INFO:	QUERY:	ENSMUSG00000078314	GM14762	predicted gene 14762 [Source:MGI Symbol;Acc:MGI:3705212]
#INFO:	QUERY:	ENSMUSG00000039639	KCNE1	potassium voltage-gated channel, Isk-related subfamily, member 1 [Source:MGI Symbol;Acc:MGI:96673]
#INFO:	QUERY:	ENSMUSG00000047115	FAM221A	family with sequence similarity 221, member A [Source:MGI Symbol;Acc:MGI:2442161]
#INFO:	QUERY:	ENSMUSG00000107921	GM6423	predicted gene 6423 [Source:MGI Symbol;Acc:MGI:3779596]
#INFO:	QUERY:	ENSMUSG00000041750	CD1D2	CD1d2 antigen [Source:MGI Symbol;Acc:MGI:107675]
#INFO:	QUERY:	ENSMUSG00000080057	GM12378	predicted gene 12378 [Source:MGI Symbol;Acc:MGI:3651610]
#INFO:	QUERY:	ENSMUSG00000046248	KRTAP5-3	keratin associated protein 5-3 [Source:MGI Symbol;Acc:MGI:1924465]
#INFO:	QUERY:	ENSMUSG00000058435	BTNL4	butyrophilin-like 4 [Source:MGI Symbol;Acc:MGI:1932036]
#INFO:	QUERY:	ENSMUSG00000084302	GM12194	predicted gene 12194 [Source:MGI Symbol;Acc:MGI:3651099]
#INFO:	QUERY:	ENSMUSG00000057132	RPGRIP1	retinitis pigmentosa GTPase regulator interacting protein 1 [Source:MGI Symbol;Acc:MGI:1932134]
#INFO:	QUERY:	ENSMUSG00000090939	GM17147	predicted gene 17147 [Source:MGI Symbol;Acc:MGI:4937974]
#INFO:	QUERY:	ENSMUSG00000005649	CABP5	calcium binding protein 5 [Source:MGI Symbol;Acc:MGI:1352746]
#INFO:	QUERY:	ENSMUSG00000085977	GM5970	predicted gene 5970 [Source:MGI Symbol;Acc:MGI:3646761]
#INFO:	QUERY:	ENSMUSG00000108127	GM12845	predicted gene 12845 [Source:MGI Symbol;Acc:MGI:3651666]
#INFO:	QUERY:	ENSMUSG00000046245	PILRA	paired immunoglobin-like type 2 receptor alpha [Source:MGI Symbol;Acc:MGI:2450529]
#INFO:	QUERY:	ENSMUSG00000040829	ZMYND15	zinc finger, MYND-type containing 15 [Source:MGI Symbol;Acc:MGI:3603821]
#INFO:	QUERY:	ENSMUSG00000101622	MRGPRA18-PS	MAS-related GPR, member A18, pseudogene [Source:MGI Symbol;Acc:MGI:3033177]
#INFO:	QUERY:	ENSMUSG00000086899	1600002D24RIK	RIKEN cDNA 1600002D24 gene [Source:MGI Symbol;Acc:MGI:1917026]
#INFO:	QUERY:	ENSMUSG00000106735	A330058E17RIK	RIKEN cDNA A330058E17 gene [Source:MGI Symbol;Acc:MGI:2442263]
#INFO:	QUERY:	ENSMUSG00000079143	ATXN7L1OS1	ataxin 7-like 1, opposite strand 1 [Source:MGI Symbol;Acc:MGI:3779275]
#INFO:	QUERY:	ENSMUSG00000016327	ATP1B4	ATPase, (Na+)/K+ transporting, beta 4 polypeptide [Source:MGI Symbol;Acc:MGI:1915071]
#INFO:	QUERY:	ENSMUSG00000032852	RSPO4	R-spondin 4 [Source:MGI Symbol;Acc:MGI:1924467]
#INFO:	QUERY:	ENSMUSG00000024672	MS4A7	membrane-spanning 4-domains, subfamily A, member 7 [Source:MGI Symbol;Acc:MGI:1918846]
#INFO:	QUERY:	ENSMUSG00000074361	C5AR2	complement component 5a receptor 2 [Source:MGI Symbol;Acc:MGI:2442013]
#INFO:	QUERY:	ENSMUSG00000025075	HABP2	hyaluronic acid binding protein 2 [Source:MGI Symbol;Acc:MGI:1196378]
#INFO:	QUERY:	ENSMUSG00000031383	DUSP9	dual specificity phosphatase 9 [Source:MGI Symbol;Acc:MGI:2387107]
#INFO:	QUERY:	ENSMUSG00000066058	CLDN19	claudin 19 [Source:MGI Symbol;Acc:MGI:3033992]
#INFO:	QUERY:	ENSMUSG00000040478	PRDM13	PR domain containing 13 [Source:MGI Symbol;Acc:MGI:2448528]
#INFO:	QUERY:	ENSMUSG00000095143	HSD3B4	hydroxy-delta-5-steroid dehydrogenase, 3 beta- and steroid delta-isomerase 4 [Source:MGI Symbol;Acc:MGI:96236]
#INFO:	QUERY:	ENSMUSG00000095388	GM10681	predicted gene 10681 [Source:MGI Symbol;Acc:MGI:3711284]
#INFO:	QUERY:	ENSMUSG00000074003	GUCY2D	guanylate cyclase 2d [Source:MGI Symbol;Acc:MGI:106030]
#INFO:	QUERY:	ENSMUSG00000039070	CPA4	carboxypeptidase A4 [Source:MGI Symbol;Acc:MGI:1919041]
#INFO:	QUERY:	ENSMUSG00000103556	GM38215	predicted gene, 38215 [Source:MGI Symbol;Acc:MGI:5611443]
#INFO:	QUERY:	ENSMUSG00000056008	GM11541	predicted gene 11541 [Source:MGI Symbol;Acc:MGI:3650066]
#INFO:	QUERY:	ENSMUSG00000051457	SPN	sialophorin [Source:MGI Symbol;Acc:MGI:98384]
#INFO:	QUERY:	ENSMUSG00000035498	CDCP1	CUB domain containing protein 1 [Source:MGI Symbol;Acc:MGI:2442010]
#INFO:	QUERY:	ENSMUSG00000090465	GM3091	predicted gene 3091 [Source:MGI Symbol;Acc:MGI:3781267]
#INFO:	QUERY:	ENSMUSG00000095105	EDARADD	EDAR (ectodysplasin-A receptor)-associated death domain [Source:MGI Symbol;Acc:MGI:1931001]
#INFO:	QUERY:	ENSMUSG00000025020	SLIT1	slit homolog 1 (Drosophila) [Source:MGI Symbol;Acc:MGI:1315203]
#INFO:	QUERY:	ENSMUSG00000045775	SLC16A5	solute carrier family 16 (monocarboxylic acid transporters), member 5 [Source:MGI Symbol;Acc:MGI:2443515]
#INFO:	QUERY:	ENSMUSG00000083654	GM11875	predicted gene 11875 [Source:MGI Symbol;Acc:MGI:3649519]
#INFO:	QUERY:	ENSMUSG00000102658	GM37076	predicted gene, 37076 [Source:MGI Symbol;Acc:MGI:5610304]
#INFO:	QUERY:	ENSMUSG00000023039	KRT7	keratin 7 [Source:MGI Symbol;Acc:MGI:96704]
#INFO:	QUERY:	ENSMUSG00000027790	SIS	sucrase isomaltase (alpha-glucosidase) [Source:MGI Symbol;Acc:MGI:1917233]
#INFO:	QUERY:	ENSMUSG00000075420	SMIM6	small integral membrane protein 6 [Source:MGI Symbol;Acc:MGI:1915778]
#INFO:	QUERY:	ENSMUSG00000026253	CHRNG	cholinergic receptor, nicotinic, gamma polypeptide [Source:MGI Symbol;Acc:MGI:87895]
#INFO:	QUERY:	ENSMUSG00000107287	GM43458	predicted gene 43458 [Source:MGI Symbol;Acc:MGI:5663595]
#INFO:	QUERY:	ENSMUSG00000108342	GM29920	predicted gene, 29920 [Source:MGI Symbol;Acc:MGI:5589079]
#INFO:	QUERY:	ENSMUSG00000091818	RPL19-PS4	ribosomal protein L19, pseudogene 4 [Source:MGI Symbol;Acc:MGI:3646824]
#INFO:	QUERY:	ENSMUSG00000047220	CCDC36	coiled-coil domain containing 36 [Source:MGI Symbol;Acc:MGI:3612242]
#INFO:	QUERY:	ENSMUSG00000030606	HAPLN3	hyaluronan and proteoglycan link protein 3 [Source:MGI Symbol;Acc:MGI:1914916]
#INFO:	QUERY:	ENSMUSG00000055403	4933427D06RIK	RIKEN cDNA 4933427D06 gene [Source:MGI Symbol;Acc:MGI:3026922]
#INFO:	QUERY:	ENSMUSG00000047021	CFAP65	cilia and flagella associated protein 65 [Source:MGI Symbol;Acc:MGI:2444274]
#INFO:	QUERY:	ENSMUSG00000022768	CCDC116	coiled-coil domain containing 116 [Source:MGI Symbol;Acc:MGI:1924122]
#INFO:	QUERY:	ENSMUSG00000101166	GM28496	predicted gene 28496 [Source:MGI Symbol;Acc:MGI:5579202]
#INFO:	QUERY:	ENSMUSG00000068262	GM5879	predicted gene 5879 [Source:MGI Symbol;Acc:MGI:3647624]
#INFO:	QUERY:	ENSMUSG00000102338	GM37236	predicted gene, 37236 [Source:MGI Symbol;Acc:MGI:5610464]
#INFO:	QUERY:	ENSMUSG00000028738	TAS1R2	taste receptor, type 1, member 2 [Source:MGI Symbol;Acc:MGI:1933546]
#INFO:	QUERY:	ENSMUSG00000047094	OFCC1	orofacial cleft 1 candidate 1 [Source:MGI Symbol;Acc:MGI:2658851]
#INFO:	QUERY:	ENSMUSG00000082340	GM11321	predicted gene 11321 [Source:MGI Symbol;Acc:MGI:3651028]
#INFO:	QUERY:	ENSMUSG00000089804	GM16136	predicted gene 16136 [Source:MGI Symbol;Acc:MGI:3802137]
#INFO:	QUERY:	ENSMUSG00000078320	TEX13C1	TEX13 family member C1 [Source:MGI Symbol;Acc:MGI:2685208]
#INFO:	QUERY:	ENSMUSG00000097352	C920009B18RIK	RIKEN cDNA C920009B18 gene [Source:MGI Symbol;Acc:MGI:3583961]
#INFO:	QUERY:	ENSMUSG00000021647	CARTPT	CART prepropeptide [Source:MGI Symbol;Acc:MGI:1351330]
#INFO:	QUERY:	ENSMUSG00000070280	SLC22A14	solute carrier family 22 (organic cation transporter), member 14 [Source:MGI Symbol;Acc:MGI:2685974]
#INFO:	QUERY:	ENSMUSG00000108362	GM18561	predicted gene, 18561 [Source:MGI Symbol;Acc:MGI:5010746]
#INFO:	QUERY:	ENSMUSG00000060204	GM5868	predicted gene 5868 [Source:MGI Symbol;Acc:MGI:3645333]
#INFO:	QUERY:	ENSMUSG00000033837	FOXH1	forkhead box H1 [Source:MGI Symbol;Acc:MGI:1347465]
#INFO:	QUERY:	ENSMUSG00000032572	COL6A4	collagen, type VI, alpha 4 [Source:MGI Symbol;Acc:MGI:1915803]
#INFO:	QUERY:	ENSMUSG00000052496	PKDREJ	polycystin (PKD) family receptor for egg jelly [Source:MGI Symbol;Acc:MGI:1338786]
#INFO:	QUERY:	ENSMUSG00000074259	GRAMD2	GRAM domain containing 2 [Source:MGI Symbol;Acc:MGI:3528937]
#INFO:	QUERY:	ENSMUSG00000031932	GPR83	G protein-coupled receptor 83 [Source:MGI Symbol;Acc:MGI:95712]
#INFO:	QUERY:	ENSMUSG00000027015	CYBRD1	cytochrome b reductase 1 [Source:MGI Symbol;Acc:MGI:2654575]
#INFO:	QUERY:	ENSMUSG00000033450	TAGAP	T cell activation Rho GTPase activating protein [Source:MGI Symbol;Acc:MGI:3615484]
#INFO:	QUERY:	ENSMUSG00000073932	OLFR641	olfactory receptor 641 [Source:MGI Symbol;Acc:MGI:3030475]
#INFO:	QUERY:	ENSMUSG00000103849	GM37806	predicted gene, 37806 [Source:MGI Symbol;Acc:MGI:5611034]
#INFO:	QUERY:	ENSMUSG00000017007	RBPJL	recombination signal binding protein for immunoglobulin kappa J region-like [Source:MGI Symbol;Acc:MGI:1196616]
#INFO:	QUERY:	ENSMUSG00000051176	ZFP42	zinc finger protein 42 [Source:MGI Symbol;Acc:MGI:99187]
#INFO:	QUERY:	ENSMUSG00000097959	GM6931	predicted gene 6931 [Source:MGI Symbol;Acc:MGI:3645140]
#INFO:	QUERY:	ENSMUSG00000020798	SPNS3	spinster homolog 3 [Source:MGI Symbol;Acc:MGI:1924827]
#INFO:	QUERY:	ENSMUSG00000062793	OLFR1158	olfactory receptor 1158 [Source:MGI Symbol;Acc:MGI:3030992]
#INFO:	QUERY:	ENSMUSG00000001444	TBX21	T-box 21 [Source:MGI Symbol;Acc:MGI:1888984]
#INFO:	QUERY:	ENSMUSG00000024365	CYP21A1	cytochrome P450, family 21, subfamily a, polypeptide 1 [Source:MGI Symbol;Acc:MGI:88591]
#INFO:	QUERY:	ENSMUSG00000096655	1700065D16RIK	RIKEN cDNA 1700065D16 gene [Source:MGI Symbol;Acc:MGI:1920660]
#INFO:	QUERY:	ENSMUSG00000030450	OCA2	oculocutaneous albinism II [Source:MGI Symbol;Acc:MGI:97454]
#INFO:	QUERY:	ENSMUSG00000105237	GM42580	predicted gene 42580 [Source:MGI Symbol;Acc:MGI:5662717]
#INFO:	QUERY:	ENSMUSG00000073723	GM13102	predicted gene 13102 [Source:MGI Symbol;Acc:MGI:3703005]
#INFO:	QUERY:	ENSMUSG00000092510	GM18343	predicted gene, 18343 [Source:MGI Symbol;Acc:MGI:5010528]
#INFO:	QUERY:	ENSMUSG00000025839	PRAMEL7	preferentially expressed antigen in melanoma like 7 [Source:MGI Symbol;Acc:MGI:2156391]
#INFO:	QUERY:	ENSMUSG00000014813	STC1	stanniocalcin 1 [Source:MGI Symbol;Acc:MGI:109131]
#INFO:	QUERY:	ENSMUSG00000043859	1700049L16RIK	RIKEN cDNA 1700049L16 gene [Source:MGI Symbol;Acc:MGI:1920633]
#INFO:	QUERY:	ENSMUSG00000101162	GM26728	predicted gene, 26728 [Source:MGI Symbol;Acc:MGI:5477222]
#INFO:	QUERY:	ENSMUSG00000038700	HOXB5	homeobox B5 [Source:MGI Symbol;Acc:MGI:96186]
#INFO:	QUERY:	ENSMUSG00000070374	OLFR59	olfactory receptor 59 [Source:MGI Symbol;Acc:MGI:1333755]
#INFO:	QUERY:	ENSMUSG00000066364	SERPINA3B	serine (or cysteine) peptidase inhibitor, clade A, member 3B [Source:MGI Symbol;Acc:MGI:2182835]
#INFO:	QUERY:	ENSMUSG00000031253	SRPX2	sushi-repeat-containing protein, X-linked 2 [Source:MGI Symbol;Acc:MGI:1916042]
#INFO:	QUERY:	ENSMUSG00000087001	GM15475	predicted gene 15475 [Source:MGI Symbol;Acc:MGI:3705288]
#INFO:	QUERY:	ENSMUSG00000025701	ALOX5	arachidonate 5-lipoxygenase [Source:MGI Symbol;Acc:MGI:87999]
#INFO:	QUERY:	ENSMUSG00000082980	OLFR1274-PS	olfactory receptor 1274, pseudogene [Source:MGI Symbol;Acc:MGI:3031108]
#INFO:	QUERY:	ENSMUSG00000047502	MROH7	maestro heat-like repeat family member 7 [Source:MGI Symbol;Acc:MGI:2685873]
#INFO:	QUERY:	ENSMUSG00000019893	ROS1	Ros1 proto-oncogene [Source:MGI Symbol;Acc:MGI:97999]
#INFO:	QUERY:	ENSMUSG00000070908	GM13288	predicted gene 13288 [Source:MGI Symbol;Acc:MGI:3701985]
#INFO:	QUERY:	ENSMUSG00000092269	GM9577	predicted gene 9577 [Source:MGI Symbol;Acc:MGI:3779986]
#INFO:	QUERY:	ENSMUSG00000087094	GM13093	predicted gene 13093 [Source:MGI Symbol;Acc:MGI:3650866]
#INFO:	QUERY:	ENSMUSG00000094052	GM21118	predicted gene, 21118 [Source:MGI Symbol;Acc:MGI:5434473]
#INFO:	QUERY:	ENSMUSG00000095270	IFNA9	interferon alpha 9 [Source:MGI Symbol;Acc:MGI:107659]
#INFO:	QUERY:	ENSMUSG00000105402	GM3716	predicted gene 3716 [Source:MGI Symbol;Acc:MGI:3781892]
#INFO:	QUERY:	ENSMUSG00000109404	GM19963	predicted gene, 19963 [Source:MGI Symbol;Acc:MGI:5012148]
#INFO:	QUERY:	ENSMUSG00000051680	OLFR693	olfactory receptor 693 [Source:MGI Symbol;Acc:MGI:3030527]
#INFO:	QUERY:	ENSMUSG00000023737	1700082M22RIK	RIKEN cDNA 1700082M22 gene [Source:MGI Symbol;Acc:MGI:1920784]
#INFO:	QUERY:	ENSMUSG00000090439	GM17455	predicted gene, 17455 [Source:MGI Symbol;Acc:MGI:4937089]
#INFO:	QUERY:	ENSMUSG00000100841	GM21115	predicted gene, 21115 [Source:MGI Symbol;Acc:MGI:5434470]
#INFO:	QUERY:	ENSMUSG00000061809	TBPL2	TATA box binding protein like 2 [Source:MGI Symbol;Acc:MGI:2684058]
#INFO:	QUERY:	ENSMUSG00000032511	SCN5A	sodium channel, voltage-gated, type V, alpha [Source:MGI Symbol;Acc:MGI:98251]
#INFO:	QUERY:	ENSMUSG00000060375	3110018I06RIK	RIKEN cDNA 3110018I06 gene [Source:MGI Symbol;Acc:MGI:1920410]
#INFO:	QUERY:	ENSMUSG00000022542	SEPT12	septin 12 [Source:MGI Symbol;Acc:MGI:1918339]
#INFO:	QUERY:	ENSMUSG00000108831	GM7957	predicted gene 7957 [Source:MGI Symbol;Acc:MGI:3643208]
#INFO:	QUERY:	ENSMUSG00000028068	IQGAP3	IQ motif containing GTPase activating protein 3 [Source:MGI Symbol;Acc:MGI:3028642]
#INFO:	QUERY:	ENSMUSG00000044724	GPR152	G protein-coupled receptor 152 [Source:MGI Symbol;Acc:MGI:2685519]
#INFO:	QUERY:	ENSMUSG00000028749	PLA2G2F	phospholipase A2, group IIF [Source:MGI Symbol;Acc:MGI:1349661]
#INFO:	QUERY:	ENSMUSG00000044286	OLFR221	olfactory receptor 221 [Source:MGI Symbol;Acc:MGI:3030055]
#INFO:	QUERY:	ENSMUSG00000086514	GM11747	predicted gene 11747 [Source:MGI Symbol;Acc:MGI:3702093]
#INFO:	QUERY:	ENSMUSG00000050917	FGF4	fibroblast growth factor 4 [Source:MGI Symbol;Acc:MGI:95518]
#INFO:	QUERY:	ENSMUSG00000064201	KRT2	keratin 2 [Source:MGI Symbol;Acc:MGI:96699]
#INFO:	QUERY:	ENSMUSG00000043621	UBXN10	UBX domain protein 10 [Source:MGI Symbol;Acc:MGI:2443123]
#INFO:	QUERY:	ENSMUSG00000081402	GM15455	predicted gene 15455 [Source:MGI Symbol;Acc:MGI:3705563]
#INFO:	QUERY:	ENSMUSG00000029755	DLX5	distal-less homeobox 5 [Source:MGI Symbol;Acc:MGI:101926]
#INFO:	QUERY:	ENSMUSG00000074473	A230072I06RIK	RIKEN cDNA A230072I06 gene [Source:MGI Symbol;Acc:MGI:3588221]
#INFO:	QUERY:	ENSMUSG00000037446	TULP1	tubby like protein 1 [Source:MGI Symbol;Acc:MGI:109571]
#INFO:	QUERY:	ENSMUSG00000057058	SKAP1	src family associated phosphoprotein 1 [Source:MGI Symbol;Acc:MGI:1925723]
#INFO:	QUERY:	ENSMUSG00000026786	APBB1IP	amyloid beta (A4) precursor protein-binding, family B, member 1 interacting protein [Source:MGI Symbol;Acc:MGI:1861354]
#INFO:	QUERY:	ENSMUSG00000051220	ERCC6L	excision repair cross-complementing rodent repair deficiency complementation group 6 like [Source:MGI Symbol;Acc:MGI:2654144]
#INFO:	QUERY:	ENSMUSG00000020897	AURKB	aurora kinase B [Source:MGI Symbol;Acc:MGI:107168]
#INFO:	QUERY:	ENSMUSG00000026196	BARD1	BRCA1 associated RING domain 1 [Source:MGI Symbol;Acc:MGI:1328361]
#INFO:	QUERY:	ENSMUSG00000094318	GM13144	predicted gene 13144 [Source:MGI Symbol;Acc:MGI:3651743]
#INFO:	QUERY:	ENSMUSG00000043448	GJC2	gap junction protein, gamma 2 [Source:MGI Symbol;Acc:MGI:2153060]
#INFO:	QUERY:	ENSMUSG00000101431	GM7901	predicted gene 7901 [Source:MGI Symbol;Acc:MGI:3645047]
#INFO:	QUERY:	ENSMUSG00000039097	RLN1	relaxin 1 [Source:MGI Symbol;Acc:MGI:97931]
#INFO:	QUERY:	ENSMUSG00000052273	DNAH3	dynein, axonemal, heavy chain 3 [Source:MGI Symbol;Acc:MGI:2683040]
#INFO:	QUERY:	ENSMUSG00000046179	E2F8	E2F transcription factor 8 [Source:MGI Symbol;Acc:MGI:1922038]
#INFO:	QUERY:	ENSMUSG00000072814	GM7982	predicted gene 7982 [Source:MGI Symbol;Acc:MGI:3648891]
#INFO:	QUERY:	ENSMUSG00000075164	OLFR1106	olfactory receptor 1106 [Source:MGI Symbol;Acc:MGI:3030940]
#INFO:	QUERY:	ENSMUSG00000042377	FAM83G	family with sequence similarity 83, member G [Source:MGI Symbol;Acc:MGI:1916890]
#INFO:	QUERY:	ENSMUSG00000074151	NLRC5	NLR family, CARD domain containing 5 [Source:MGI Symbol;Acc:MGI:3612191]
#INFO:	QUERY:	ENSMUSG00000093651	GM5873	predicted gene 5873 [Source:MGI Symbol;Acc:MGI:3648385]
#INFO:	QUERY:	ENSMUSG00000001095	SLC13A2	solute carrier family 13 (sodium-dependent dicarboxylate transporter), member 2 [Source:MGI Symbol;Acc:MGI:1276558]
#INFO:	QUERY:	ENSMUSG00000040614	NLRP9C	NLR family, pyrin domain containing 9C [Source:MGI Symbol;Acc:MGI:3028627]
#INFO:	QUERY:	ENSMUSG00000029663	GNGT1	guanine nucleotide binding protein (G protein), gamma transducing activity polypeptide 1 [Source:MGI Symbol;Acc:MGI:109165]
#INFO:	QUERY:	ENSMUSG00000105291	GM18901	predicted gene, 18901 [Source:MGI Symbol;Acc:MGI:5011086]
#INFO:	QUERY:	ENSMUSG00000070661	RNF186	ring finger protein 186 [Source:MGI Symbol;Acc:MGI:1914075]
#INFO:	QUERY:	ENSMUSG00000087022	9130024F11RIK	RIKEN cDNA 9130024F11 gene [Source:MGI Symbol;Acc:MGI:1926150]
#INFO:	QUERY:	ENSMUSG00000076433	CEP295NL	CEP295 N-terminal like [Source:MGI Symbol;Acc:MGI:1929713]
#INFO:	QUERY:	ENSMUSG00000068817	OLFR1140	olfactory receptor 1140 [Source:MGI Symbol;Acc:MGI:3030974]
#INFO:	QUERY:	ENSMUSG00000095503	GM3147	predicted gene 3147 [Source:MGI Symbol;Acc:MGI:3781326]
#INFO:	QUERY:	ENSMUSG00000098112	BIN2	bridging integrator 2 [Source:MGI Symbol;Acc:MGI:3611448]
#INFO:	QUERY:	ENSMUSG00000014778	FHOD1	formin homology 2 domain containing 1 [Source:MGI Symbol;Acc:MGI:2679008]
#INFO:	QUERY:	ENSMUSG00000107336	GM43461	predicted gene 43461 [Source:MGI Symbol;Acc:MGI:5663598]
#INFO:	QUERY:	ENSMUSG00000108750	GM44750	predicted gene 44750 [Source:MGI Symbol;Acc:MGI:5753326]
#INFO:	QUERY:	ENSMUSG00000023120	GM853	predicted gene 853 [Source:MGI Symbol;Acc:MGI:2685699]
#INFO:	QUERY:	ENSMUSG00000101251	GM3496	predicted gene 3496 [Source:MGI Symbol;Acc:MGI:3781673]
#INFO:	QUERY:	ENSMUSG00000102759	GM10463	predicted gene 10463 [Source:MGI Symbol;Acc:MGI:3642170]
#INFO:	QUERY:	ENSMUSG00000027684	MECOM	MDS1 and EVI1 complex locus [Source:MGI Symbol;Acc:MGI:95457]
#INFO:	QUERY:	ENSMUSG00000053490	TRIM60	tripartite motif-containing 60 [Source:MGI Symbol;Acc:MGI:2387430]
#INFO:	QUERY:	ENSMUSG00000047129	1700113H08RIK	RIKEN cDNA 1700113H08 gene [Source:MGI Symbol;Acc:MGI:1923890]
#INFO:	QUERY:	ENSMUSG00000071716	APOL7E	apolipoprotein L 7e [Source:MGI Symbol;Acc:MGI:3704456]
#INFO:	QUERY:	ENSMUSG00000028736	PAX7	paired box 7 [Source:MGI Symbol;Acc:MGI:97491]
#INFO:	QUERY:	ENSMUSG00000023931	EFHB	EF hand domain family, member B [Source:MGI Symbol;Acc:MGI:3045296]
#INFO:	QUERY:	ENSMUSG00000056696	OLFR1350	olfactory receptor 1350 [Source:MGI Symbol;Acc:MGI:3031184]
#INFO:	QUERY:	ENSMUSG00000085524	GM14224	predicted gene 14224 [Source:MGI Symbol;Acc:MGI:3649242]
#INFO:	QUERY:	ENSMUSG00000009350	MPO	myeloperoxidase [Source:MGI Symbol;Acc:MGI:97137]
#INFO:	QUERY:	ENSMUSG00000051965	NANOS2	nanos homolog 2 (Drosophila) [Source:MGI Symbol;Acc:MGI:2676627]
#INFO:	QUERY:	ENSMUSG00000103951	GM37269	predicted gene, 37269 [Source:MGI Symbol;Acc:MGI:5610497]
#INFO:	QUERY:	ENSMUSG00000097694	G730013B05RIK	RIKEN cDNA G730013B05 gene [Source:MGI Symbol;Acc:MGI:3588276]
#INFO:	QUERY:	ENSMUSG00000000320	ALOX12	arachidonate 12-lipoxygenase [Source:MGI Symbol;Acc:MGI:87998]
#INFO:	QUERY:	ENSMUSG00000024697	GNA14	guanine nucleotide binding protein, alpha 14 [Source:MGI Symbol;Acc:MGI:95769]
#INFO:	QUERY:	ENSMUSG00000107622	4930512J16RIK	RIKEN cDNA 4930512J16 gene [Source:MGI Symbol;Acc:MGI:1922381]
#INFO:	QUERY:	ENSMUSG00000050195	SCD4	stearoyl-coenzyme A desaturase 4 [Source:MGI Symbol;Acc:MGI:2670997]
#INFO:	QUERY:	ENSMUSG00000107922	GM44285	predicted gene, 44285 [Source:MGI Symbol;Acc:MGI:5690677]
#INFO:	QUERY:	ENSMUSG00000027322	SIGLEC1	sialic acid binding Ig-like lectin 1, sialoadhesin [Source:MGI Symbol;Acc:MGI:99668]
#INFO:	QUERY:	ENSMUSG00000054758	N/A	N/A
#INFO:	QUERY:	ENSMUSG00000029727	CYP3A13	cytochrome P450, family 3, subfamily a, polypeptide 13 [Source:MGI Symbol;Acc:MGI:88610]
#INFO:	QUERY:	ENSMUSG00000030228	PIK3C2G	phosphatidylinositol-4-phosphate 3-kinase catalytic subunit type 2 gamma [Source:MGI Symbol;Acc:MGI:1203730]
#INFO:	QUERY:	ENSMUSG00000107794	GM44095	predicted gene, 44095 [Source:MGI Symbol;Acc:MGI:5690487]
#INFO:	QUERY:	ENSMUSG00000036587	FUT7	fucosyltransferase 7 [Source:MGI Symbol;Acc:MGI:107692]
#INFO:	QUERY:	ENSMUSG00000032274	CYP19A1	cytochrome P450, family 19, subfamily a, polypeptide 1 [Source:MGI Symbol;Acc:MGI:88587]
#INFO:	QUERY:	ENSMUSG00000025215	TLX1	T cell leukemia, homeobox 1 [Source:MGI Symbol;Acc:MGI:98769]
#INFO:	QUERY:	ENSMUSG00000070390	NLRP1B	NLR family, pyrin domain containing 1B [Source:MGI Symbol;Acc:MGI:3582959]
#INFO:	QUERY:	ENSMUSG00000029379	CXCL3	chemokine (C-X-C motif) ligand 3 [Source:MGI Symbol;Acc:MGI:3037818]
#INFO:	QUERY:	ENSMUSG00000047861	FOXI1	forkhead box I1 [Source:MGI Symbol;Acc:MGI:1096329]
#INFO:	QUERY:	ENSMUSG00000035852	MISP	mitotic spindle positioning [Source:MGI Symbol;Acc:MGI:1926156]
#INFO:	QUERY:	ENSMUSG00000035420	FAM170A	family with sequence similarity 170, member A [Source:MGI Symbol;Acc:MGI:2684939]
#INFO:	QUERY:	ENSMUSG00000108444	KLK2-PS	kallikrein-related peptidase 2, pseudogene [Source:MGI Symbol;Acc:MGI:892028]
#INFO:	QUERY:	ENSMUSG00000028475	SPAAR	small regulatory polypeptide of amino acid response [Source:MGI Symbol;Acc:MGI:1918656]
#INFO:	QUERY:	ENSMUSG00000001021	S100A3	S100 calcium binding protein A3 [Source:MGI Symbol;Acc:MGI:1338849]
#INFO:	QUERY:	ENSMUSG00000087678	GM14120	predicted gene 14120 [Source:MGI Symbol;Acc:MGI:3651530]
#INFO:	QUERY:	ENSMUSG00000101046	GM28803	predicted gene 28803 [Source:MGI Symbol;Acc:MGI:5579509]
#INFO:	QUERY:	ENSMUSG00000078925	D030018L15RIK	RIKEN cDNA D030018L15 gene [Source:MGI Symbol;Acc:MGI:3028082]
#INFO:	QUERY:	ENSMUSG00000050063	KLK6	kallikrein related-peptidase 6 [Source:MGI Symbol;Acc:MGI:1343166]
#INFO:	QUERY:	ENSMUSG00000079022	COL22A1	collagen, type XXII, alpha 1 [Source:MGI Symbol;Acc:MGI:1916950]
#INFO:	QUERY:	ENSMUSG00000071471	KRTAP26-1	keratin associated protein 26-1 [Source:MGI Symbol;Acc:MGI:1916783]
#INFO:	QUERY:	ENSMUSG00000048217	NAGS	N-acetylglutamate synthase [Source:MGI Symbol;Acc:MGI:2387600]
#INFO:	QUERY:	ENSMUSG00000094556	GM20821	predicted gene, 20821 [Source:MGI Symbol;Acc:MGI:5434177]
#INFO:	QUERY:	ENSMUSG00000052477	C130026I21RIK	RIKEN cDNA C130026I21 gene [Source:MGI Symbol;Acc:MGI:3612702]
#INFO:	QUERY:	ENSMUSG00000102337	GM37232	predicted gene, 37232 [Source:MGI Symbol;Acc:MGI:5610460]
#INFO:	QUERY:	ENSMUSG00000070331	QRICH2	glutamine rich 2 [Source:MGI Symbol;Acc:MGI:2684912]
#INFO:	QUERY:	ENSMUSG00000036040	ADAMTSL2	ADAMTS-like 2 [Source:MGI Symbol;Acc:MGI:1925044]
#INFO:	QUERY:	ENSMUSG00000041358	NUTM1	NUT midline carcinoma, family member 1 [Source:MGI Symbol;Acc:MGI:2661384]
#INFO:	QUERY:	ENSMUSG00000034239	GM884	predicted gene 884 [Source:MGI Symbol;Acc:MGI:2685730]
#INFO:	QUERY:	ENSMUSG00000048411	GM597	predicted gene 597 [Source:MGI Symbol;Acc:MGI:2685443]
#INFO:	QUERY:	ENSMUSG00000067524	OLFR1428	olfactory receptor 1428 [Source:MGI Symbol;Acc:MGI:3031262]
#INFO:	QUERY:	ENSMUSG00000058820	OLFR146	olfactory receptor 146 [Source:MGI Symbol;Acc:MGI:2660711]
#INFO:	QUERY:	ENSMUSG00000099706	GM29536	predicted gene 29536 [Source:MGI Symbol;Acc:MGI:5580242]
#INFO:	QUERY:	ENSMUSG00000046764	A530053G22RIK	RIKEN cDNA A530053G22 gene [Source:MGI Symbol;Acc:MGI:2443347]
#INFO:	QUERY:	ENSMUSG00000109069	GM2734	predicted gene 2734 [Source:MGI Symbol;Acc:MGI:3780903]
#INFO:	QUERY:	ENSMUSG00000024670	CD6	CD6 antigen [Source:MGI Symbol;Acc:MGI:103566]
#INFO:	QUERY:	ENSMUSG00000107405	GM44115	predicted gene, 44115 [Source:MGI Symbol;Acc:MGI:5690507]
#INFO:	QUERY:	ENSMUSG00000056418	BC043934	cDNA sequence BC043934 [Source:MGI Symbol;Acc:MGI:2679715]
#INFO:	QUERY:	ENSMUSG00000042514	KLHL14	kelch-like 14 [Source:MGI Symbol;Acc:MGI:1921249]
#INFO:	QUERY:	ENSMUSG00000063240	OLFR133	olfactory receptor 133 [Source:MGI Symbol;Acc:MGI:2177516]
#INFO:	QUERY:	ENSMUSG00000046119	1110008E08RIK	RIKEN cDNA 1110008E08 gene [Source:MGI Symbol;Acc:MGI:1915750]
#INFO:	QUERY:	ENSMUSG00000107029	GM43123	predicted gene 43123 [Source:MGI Symbol;Acc:MGI:5663260]
#INFO:	QUERY:	ENSMUSG00000042265	TREM1	triggering receptor expressed on myeloid cells 1 [Source:MGI Symbol;Acc:MGI:1930005]
#INFO:	QUERY:	ENSMUSG00000100212	GM5522	predicted gene 5522 [Source:MGI Symbol;Acc:MGI:3649087]
#INFO:	QUERY:	ENSMUSG00000031340	GABRE	gamma-aminobutyric acid (GABA) A receptor, subunit epsilon [Source:MGI Symbol;Acc:MGI:1330235]
#INFO:	QUERY:	ENSMUSG00000094798	VMN1R2	vomeronasal 1 receptor 2 [Source:MGI Symbol;Acc:MGI:4438400]
#INFO:	QUERY:	ENSMUSG00000072295	C2CD6	C2 calcium dependent domain containing 6 [Source:MGI Symbol;Acc:MGI:1920713]
#INFO:	QUERY:	ENSMUSG00000073400	TRIM10	tripartite motif-containing 10 [Source:MGI Symbol;Acc:MGI:1338757]
#INFO:	QUERY:	ENSMUSG00000090588	GM9573	predicted gene 9573 [Source:MGI Symbol;Acc:MGI:3779983]
#INFO:	QUERY:	ENSMUSG00000092528	NLRP1C-PS	NLR family, pyrin domain containing 1C, pseudogene [Source:MGI Symbol;Acc:MGI:3582962]
#INFO:	QUERY:	ENSMUSG00000087246	GM13346	predicted gene 13346 [Source:MGI Symbol;Acc:MGI:3649698]
#INFO:	QUERY:	ENSMUSG00000023979	GUCA1B	guanylate cyclase activator 1B [Source:MGI Symbol;Acc:MGI:1194489]
#INFO:	QUERY:	ENSMUSG00000026708	CENPL	centromere protein L [Source:MGI Symbol;Acc:MGI:1917704]
#INFO:	QUERY:	ENSMUSG00000018973	HOXB1	homeobox B1 [Source:MGI Symbol;Acc:MGI:96182]
#INFO:	QUERY:	ENSMUSG00000097627	4930519A11RIK	RIKEN cDNA 4930519A11 gene [Source:MGI Symbol;Acc:MGI:1921946]
#INFO:	QUERY:	ENSMUSG00000075195	OLFR1048	olfactory receptor 1048 [Source:MGI Symbol;Acc:MGI:3030882]
#INFO:	QUERY:	ENSMUSG00000107842	GM44089	predicted gene, 44089 [Source:MGI Symbol;Acc:MGI:5690481]
#INFO:	QUERY:	ENSMUSG00000108473	GM44739	predicted gene 44739 [Source:MGI Symbol;Acc:MGI:5753315]
#INFO:	QUERY:	ENSMUSG00000096292	GM2666	predicted gene 2666 [Source:MGI Symbol;Acc:MGI:3780835]
#INFO:	QUERY:	ENSMUSG00000071909	NUTM2	NUT family member 2 [Source:MGI Symbol;Acc:MGI:2685652]
#INFO:	QUERY:	ENSMUSG00000026692	FMO4	flavin containing monooxygenase 4 [Source:MGI Symbol;Acc:MGI:2429497]
#INFO:	QUERY:	ENSMUSG00000043286	PNPLA1	patatin-like phospholipase domain containing 1 [Source:MGI Symbol;Acc:MGI:3617850]
#INFO:	QUERY:	ENSMUSG00000028750	PLA2G2C	phospholipase A2, group IIC [Source:MGI Symbol;Acc:MGI:106638]
#INFO:	QUERY:	ENSMUSG00000027547	SALL4	sal-like 4 (Drosophila) [Source:MGI Symbol;Acc:MGI:2139360]
#INFO:	QUERY:	ENSMUSG00000108786	GM8309	predicted gene 8309 [Source:MGI Symbol;Acc:MGI:3643545]
#INFO:	QUERY:	ENSMUSG00000066060	GM12866	predicted gene 12866 [Source:MGI Symbol;Acc:MGI:3649462]
#INFO:	QUERY:	ENSMUSG00000045725	PRR15	proline rich 15 [Source:MGI Symbol;Acc:MGI:1925254]
#INFO:	QUERY:	ENSMUSG00000079642	GM6268	predicted gene 6268 [Source:MGI Symbol;Acc:MGI:3644556]
#INFO:	QUERY:	ENSMUSG00000096268	GM20914	predicted gene, 20914 [Source:MGI Symbol;Acc:MGI:5434270]
#INFO:	QUERY:	ENSMUSG00000001588	ACAP1	ArfGAP with coiled-coil, ankyrin repeat and PH domains 1 [Source:MGI Symbol;Acc:MGI:2388270]
#INFO:	QUERY:	ENSMUSG00000102931	GM38114	predicted gene, 38114 [Source:MGI Symbol;Acc:MGI:5611342]
#INFO:	QUERY:	ENSMUSG00000046500	FAM19A4	family with sequence similarity 19, member A4 [Source:MGI Symbol;Acc:MGI:2444563]
#INFO:	QUERY:	ENSMUSG00000006204	5430419D17RIK	RIKEN cDNA 5430419D17 gene [Source:MGI Symbol;Acc:MGI:1918645]
#INFO:	QUERY:	ENSMUSG00000107972	GM18198	predicted gene, 18198 [Source:MGI Symbol;Acc:MGI:5010383]
#INFO:	QUERY:	ENSMUSG00000097168	C230088H06RIK	RIKEN cDNA C230088H06 gene [Source:MGI Symbol;Acc:MGI:2444536]
#INFO:	QUERY:	ENSMUSG00000051156	OLFR1491	olfactory receptor 1491 [Source:MGI Symbol;Acc:MGI:3031325]
#INFO:	QUERY:	ENSMUSG00000043310	OLFR571	olfactory receptor 571 [Source:MGI Symbol;Acc:MGI:3030405]
#INFO:	QUERY:	ENSMUSG00000035528	NPFFR2	neuropeptide FF receptor 2 [Source:MGI Symbol;Acc:MGI:1860130]
#INFO:	QUERY:	ENSMUSG00000005237	DNAH2	dynein, axonemal, heavy chain 2 [Source:MGI Symbol;Acc:MGI:107731]
#INFO:	QUERY:	ENSMUSG00000043441	GPR149	G protein-coupled receptor 149 [Source:MGI Symbol;Acc:MGI:2443628]
#INFO:	QUERY:	ENSMUSG00000102184	GM37192	predicted gene, 37192 [Source:MGI Symbol;Acc:MGI:5610420]
#INFO:	QUERY:	ENSMUSG00000025127	GCGR	glucagon receptor [Source:MGI Symbol;Acc:MGI:99572]
#INFO:	QUERY:	ENSMUSG00000049908	GJA8	gap junction protein, alpha 8 [Source:MGI Symbol;Acc:MGI:99953]
#INFO:	QUERY:	ENSMUSG00000031492	CHRNB3	cholinergic receptor, nicotinic, beta polypeptide 3 [Source:MGI Symbol;Acc:MGI:106212]
#INFO:	QUERY:	ENSMUSG00000064194	ZFP936	zinc finger protein 936 [Source:MGI Symbol;Acc:MGI:3642994]
#INFO:	QUERY:	ENSMUSG00000049115	AGTR1A	angiotensin II receptor, type 1a [Source:MGI Symbol;Acc:MGI:87964]
#INFO:	QUERY:	ENSMUSG00000058755	OSM	oncostatin M [Source:MGI Symbol;Acc:MGI:104749]
#INFO:	QUERY:	ENSMUSG00000086596	SUSD5	sushi domain containing 5 [Source:MGI Symbol;Acc:MGI:2685972]
#INFO:	QUERY:	ENSMUSG00000055027	SMYD1	SET and MYND domain containing 1 [Source:MGI Symbol;Acc:MGI:104790]
#INFO:	QUERY:	ENSMUSG00000086266	IGF2OS	insulin-like growth factor 2, opposite strand [Source:MGI Symbol;Acc:MGI:1195257]
#INFO:	QUERY:	ENSMUSG00000097209	AU022754	expressed sequence AU022754 [Source:MGI Symbol;Acc:MGI:2146143]
#INFO:	QUERY:	ENSMUSG00000091223	GM8775	predicted gene 8775 [Source:MGI Symbol;Acc:MGI:3646219]
#INFO:	QUERY:	ENSMUSG00000089844	A530032D15RIK	RIKEN cDNA A530032D15Rik gene [Source:MGI Symbol;Acc:MGI:3037746]
#INFO:	QUERY:	ENSMUSG00000090665	GAD1-PS	glutamate decarboxylase 1, pseudogene [Source:MGI Symbol;Acc:MGI:95633]
#INFO:	QUERY:	ENSMUSG00000083235	GM13246	predicted gene 13246 [Source:MGI Symbol;Acc:MGI:3649657]
#INFO:	QUERY:	ENSMUSG00000030325	KLRB1C	killer cell lectin-like receptor subfamily B member 1C [Source:MGI Symbol;Acc:MGI:107538]
#INFO:	QUERY:	ENSMUSG00000081228	GM16089	predicted gene 16089 [Source:MGI Symbol;Acc:MGI:3801884]
#INFO:	QUERY:	ENSMUSG00000028644	ERMAP	erythroblast membrane-associated protein [Source:MGI Symbol;Acc:MGI:1349816]
#INFO:	QUERY:	ENSMUSG00000071311	GPR31B	G protein-coupled receptor 31, D17Leh66b region [Source:MGI Symbol;Acc:MGI:1354372]
#INFO:	QUERY:	ENSMUSG00000034117	PTGDR2	prostaglandin D2 receptor 2 [Source:MGI Symbol;Acc:MGI:1330275]
#INFO:	QUERY:	ENSMUSG00000096709	GM7352	predicted gene 7352 [Source:MGI Symbol;Acc:MGI:3643017]
#INFO:	QUERY:	ENSMUSG00000020357	FLT4	FMS-like tyrosine kinase 4 [Source:MGI Symbol;Acc:MGI:95561]
#INFO:	QUERY:	ENSMUSG00000097920	GM7784	predicted gene 7784 [Source:MGI Symbol;Acc:MGI:3645448]
#INFO:	QUERY:	ENSMUSG00000030074	GXYLT2	glucoside xylosyltransferase 2 [Source:MGI Symbol;Acc:MGI:2682940]
#INFO:	QUERY:	ENSMUSG00000103394	GM10152	predicted gene 10152 [Source:MGI Symbol;Acc:MGI:3641809]
#INFO:	QUERY:	ENSMUSG00000109435	GM7067	predicted gene 7067 [Source:MGI Symbol;Acc:MGI:3779664]
#INFO:	QUERY:	ENSMUSG00000081859	OLFR650-PS1	olfactory receptor 650, pseudogene 1 [Source:MGI Symbol;Acc:MGI:3030484]
#INFO:	QUERY:	ENSMUSG00000095768	VMN1R111	vomeronasal 1 receptor 111 [Source:MGI Symbol;Acc:MGI:3645811]
#INFO:	QUERY:	ENSMUSG00000069707	TAAR4	trace amine-associated receptor 4 [Source:MGI Symbol;Acc:MGI:2685072]
#INFO:	QUERY:	ENSMUSG00000101451	GM29430	predicted gene 29430 [Source:MGI Symbol;Acc:MGI:5580136]
#INFO:	QUERY:	ENSMUSG00000048163	SELPLG	selectin, platelet (p-selectin) ligand [Source:MGI Symbol;Acc:MGI:106689]
#INFO:	QUERY:	ENSMUSG00000021675	F2RL2	coagulation factor II (thrombin) receptor-like 2 [Source:MGI Symbol;Acc:MGI:1298208]
#INFO:	QUERY:	ENSMUSG00000090193	GM15995	predicted gene 15995 [Source:MGI Symbol;Acc:MGI:3802108]
#INFO:	QUERY:	ENSMUSG00000102703	GM38313	predicted gene, 38313 [Source:MGI Symbol;Acc:MGI:5611541]
#INFO:	QUERY:	ENSMUSG00000085454	GRIP1OS3	glutamate receptor interacting protein 1, opposite strand 3 [Source:MGI Symbol;Acc:MGI:3826561]
#INFO:	QUERY:	ENSMUSG00000063767	S100A7A	S100 calcium binding protein A7A [Source:MGI Symbol;Acc:MGI:2687194]
#INFO:	QUERY:	ENSMUSG00000091013	VMN1R1	vomeronasal 1 receptor 1 [Source:MGI Symbol;Acc:MGI:3647849]
#INFO:	QUERY:	ENSMUSG00000090816	GM6729	predicted gene 6729 [Source:MGI Symbol;Acc:MGI:3646339]
#INFO:	QUERY:	ENSMUSG00000102973	E430014B02RIK	RIKEN cDNA E430014B02 gene [Source:MGI Symbol;Acc:MGI:2445017]
#INFO:	QUERY:	ENSMUSG00000042501	CPA6	carboxypeptidase A6 [Source:MGI Symbol;Acc:MGI:3045348]
#INFO:	QUERY:	ENSMUSG00000067543	PRB1	proline-rich protein BstNI subfamily 1 [Source:MGI Symbol;Acc:MGI:2681872]
#INFO:	QUERY:	ENSMUSG00000021239	VSX2	visual system homeobox 2 [Source:MGI Symbol;Acc:MGI:88401]
#INFO:	QUERY:	ENSMUSG00000100286	GM28696	predicted gene 28696 [Source:MGI Symbol;Acc:MGI:5579402]
#INFO:	QUERY:	ENSMUSG00000106520	GM8706	predicted gene 8706 [Source:MGI Symbol;Acc:MGI:3643202]
#INFO:	QUERY:	ENSMUSG00000098001	GM27048	predicted gene, 27048 [Source:MGI Symbol;Acc:MGI:5504163]
#INFO:	QUERY:	ENSMUSG00000046518	FERD3L	Fer3-like (Drosophila) [Source:MGI Symbol;Acc:MGI:2150010]
#INFO:	QUERY:	ENSMUSG00000054383	PNMA1	paraneoplastic antigen MA1 [Source:MGI Symbol;Acc:MGI:2180564]
#INFO:	QUERY:	ENSMUSG00000075598	SMOK3C	sperm motility kinase 3C [Source:MGI Symbol;Acc:MGI:3647925]
#INFO:	QUERY:	ENSMUSG00000109298	GM44886	predicted gene 44886 [Source:MGI Symbol;Acc:MGI:5753462]
#INFO:	QUERY:	ENSMUSG00000078698	MRGPRA3	MAS-related GPR, member A3 [Source:MGI Symbol;Acc:MGI:2684085]
#INFO:	QUERY:	ENSMUSG00000097840	GM26756	predicted gene, 26756 [Source:MGI Symbol;Acc:MGI:5477250]
#INFO:	QUERY:	ENSMUSG00000024815	TRPD52L3	tumor protein D52-like 3 [Source:MGI Symbol;Acc:MGI:1913995]
#INFO:	QUERY:	ENSMUSG00000108262	GM43867	predicted gene, 43867 [Source:MGI Symbol;Acc:MGI:5690259]
#INFO:	QUERY:	ENSMUSG00000101312	GM21135	predicted gene, 21135 [Source:MGI Symbol;Acc:MGI:5434490]
#INFO:	QUERY:	ENSMUSG00000101765	GM21673	predicted gene, 21673 [Source:MGI Symbol;Acc:MGI:5435028]
#INFO:	QUERY:	ENSMUSG00000047938	4930483J18RIK	RIKEN cDNA 4930483J18 gene [Source:MGI Symbol;Acc:MGI:1914888]
#INFO:	QUERY:	ENSMUSG00000099778	GM28134	predicted gene 28134 [Source:MGI Symbol;Acc:MGI:5578840]
#INFO:	QUERY:	ENSMUSG00000079620	MUC4	mucin 4 [Source:MGI Symbol;Acc:MGI:2153525]
#INFO:	QUERY:	ENSMUSG00000085126	GM12589	predicted gene 12589 [Source:MGI Symbol;Acc:MGI:3650371]
#INFO:	QUERY:	ENSMUSG00000097682	4930554H23RIK	RIKEN cDNA 4930554H23 gene [Source:MGI Symbol;Acc:MGI:1924881]
#INFO:	QUERY:	ENSMUSG00000096921	GM26822	predicted gene, 26822 [Source:MGI Symbol;Acc:MGI:5477316]
#INFO:	QUERY:	ENSMUSG00000028717	TAL1	T cell acute lymphocytic leukemia 1 [Source:MGI Symbol;Acc:MGI:98480]
#INFO:	QUERY:	ENSMUSG00000072720	MYO18B	myosin XVIIIb [Source:MGI Symbol;Acc:MGI:1921626]
#INFO:	QUERY:	ENSMUSG00000070031	SP140	Sp140 nuclear body protein [Source:MGI Symbol;Acc:MGI:3702467]
#INFO:	QUERY:	ENSMUSG00000035033	TBR1	T-box brain gene 1 [Source:MGI Symbol;Acc:MGI:107404]
#INFO:	QUERY:	ENSMUSG00000062042	OLFR294	olfactory receptor 294 [Source:MGI Symbol;Acc:MGI:3030128]
#INFO:	QUERY:	ENSMUSG00000054146	KRT15	keratin 15 [Source:MGI Symbol;Acc:MGI:96689]
#INFO:	QUERY:	ENSMUSG00000043986	SPATA31D1D	spermatogenesis associated 31 subfamily D, member 1D [Source:MGI Symbol;Acc:MGI:3045260]
#INFO:	QUERY:	ENSMUSG00000050982	APOL10A	apolipoprotein L 10A [Source:MGI Symbol;Acc:MGI:3036238]
#INFO:	QUERY:	ENSMUSG00000045493	BHLHE23	basic helix-loop-helix family, member e23 [Source:MGI Symbol;Acc:MGI:2153710]
#INFO:	QUERY:	ENSMUSG00000047025	CCER1	coiled-coil glutamate-rich protein 1 [Source:MGI Symbol;Acc:MGI:1913966]
#INFO:	QUERY:	ENSMUSG00000075089	N/A	N/A
#INFO:	QUERY:	ENSMUSG00000025885	MYO5B	myosin VB [Source:MGI Symbol;Acc:MGI:106598]
#INFO:	QUERY:	ENSMUSG00000004371	IL11	interleukin 11 [Source:MGI Symbol;Acc:MGI:107613]
#INFO:	QUERY:	ENSMUSG00000101568	1700040F17RIK	RIKEN cDNA 1700040F17 gene [Source:MGI Symbol;Acc:MGI:1920584]
#INFO:	QUERY:	ENSMUSG00000052749	TRIM30B	tripartite motif-containing 30B [Source:MGI Symbol;Acc:MGI:4821256]
#INFO:	QUERY:	ENSMUSG00000024134	SIX2	sine oculis-related homeobox 2 [Source:MGI Symbol;Acc:MGI:102778]
#INFO:	QUERY:	ENSMUSG00000108985	A930030B08RIK	RIKEN cDNA A930030B08 gene [Source:MGI Symbol;Acc:MGI:1924443]
#INFO:	QUERY:	ENSMUSG00000091809	OLFR721-PS1	olfactory receptor 721, pseudogene 1 [Source:MGI Symbol;Acc:MGI:3030555]
#INFO:	QUERY:	ENSMUSG00000030017	REG3G	regenerating islet-derived 3 gamma [Source:MGI Symbol;Acc:MGI:109406]
#INFO:	QUERY:	ENSMUSG00000109389	OLFR1300-PS1	olfactory receptor 1300, pseudogene 1 [Source:MGI Symbol;Acc:MGI:3031134]
#INFO:	QUERY:	ENSMUSG00000044055	OTOS	otospiralin [Source:MGI Symbol;Acc:MGI:2672814]
#INFO:	QUERY:	ENSMUSG00000030470	CSRP3	cysteine and glycine-rich protein 3 [Source:MGI Symbol;Acc:MGI:1330824]
#INFO:	QUERY:	ENSMUSG00000103378	GM37176	predicted gene, 37176 [Source:MGI Symbol;Acc:MGI:5610404]
#INFO:	QUERY:	ENSMUSG00000024155	MEIOB	meiosis specific with OB domains [Source:MGI Symbol;Acc:MGI:1922428]
#INFO:	QUERY:	ENSMUSG00000100660	KAT6B-PS2	k(lysine) acetyltransferase 6B, pseudogene 2 [Source:MGI Symbol;Acc:MGI:5011234]
#INFO:	QUERY:	ENSMUSG00000099781	GM28583	predicted gene 28583 [Source:MGI Symbol;Acc:MGI:5579289]
#INFO:	QUERY:	ENSMUSG00000060787	OLFR464	olfactory receptor 464 [Source:MGI Symbol;Acc:MGI:3030298]
#INFO:	QUERY:	ENSMUSG00000054134	UMODL1	uromodulin-like 1 [Source:MGI Symbol;Acc:MGI:1929785]
#INFO:	QUERY:	ENSMUSG00000101066	GM8498	predicted gene 8498 [Source:MGI Symbol;Acc:MGI:3646440]
#INFO:	QUERY:	ENSMUSG00000003341	ATP8B3	ATPase, class I, type 8B, member 3 [Source:MGI Symbol;Acc:MGI:1914581]
#INFO:	QUERY:	ENSMUSG00000043549	FAM90A1B	family with sequence similarity 90, member A1B [Source:MGI Symbol;Acc:MGI:1921682]
#INFO:	QUERY:	ENSMUSG00000028287	1700009N14RIK	RIKEN cDNA 1700009N14 gene [Source:MGI Symbol;Acc:MGI:1922721]
#INFO:	QUERY:	ENSMUSG00000106786	GM42781	predicted gene 42781 [Source:MGI Symbol;Acc:MGI:5662918]
#INFO:	QUERY:	ENSMUSG00000109050	GM6290	predicted gene 6290 [Source:MGI Symbol;Acc:MGI:3645757]
#INFO:	QUERY:	ENSMUSG00000093917	GM8660	predicted gene 8660 [Source:MGI Symbol;Acc:MGI:3645692]
#INFO:	QUERY:	ENSMUSG00000095806	GM5728	predicted gene 5728 [Source:MGI Symbol;Acc:MGI:3644398]
#INFO:	QUERY:	ENSMUSG00000044006	CILP2	cartilage intermediate layer protein 2 [Source:MGI Symbol;Acc:MGI:1915959]
#INFO:	QUERY:	ENSMUSG00000039236	ISG20	interferon-stimulated protein [Source:MGI Symbol;Acc:MGI:1928895]
#INFO:	QUERY:	ENSMUSG00000101429	BC055402	cDNA sequence BC055402 [Source:MGI Symbol;Acc:MGI:3039597]
#INFO:	QUERY:	ENSMUSG00000095901	OLFR538	olfactory receptor 538 [Source:MGI Symbol;Acc:MGI:3030372]
#INFO:	QUERY:	ENSMUSG00000021933	GUCY1B2	guanylate cyclase 1, soluble, beta 2 [Source:MGI Symbol;Acc:MGI:2660873]
#INFO:	QUERY:	ENSMUSG00000086997	GM12981	predicted gene 12981 [Source:MGI Symbol;Acc:MGI:3651528]
#INFO:	QUERY:	ENSMUSG00000073928	OLFR651	olfactory receptor 651 [Source:MGI Symbol;Acc:MGI:3030485]
#INFO:	QUERY:	ENSMUSG00000086245	GM16170	predicted gene 16170 [Source:MGI Symbol;Acc:MGI:3805548]
#INFO:	QUERY:	ENSMUSG00000100555	GM8173	predicted gene 8173 [Source:MGI Symbol;Acc:MGI:3648321]
#INFO:	QUERY:	ENSMUSG00000100389	RBM6-PS2	RNA binding motif protein 6, pseudogene 2 [Source:MGI Symbol;Acc:MGI:1889581]
#INFO:	QUERY:	ENSMUSG00000104990	GM43504	predicted gene 43504 [Source:MGI Symbol;Acc:MGI:5663641]
#INFO:	QUERY:	ENSMUSG00000045052	PRLHR	prolactin releasing hormone receptor [Source:MGI Symbol;Acc:MGI:2135956]
#INFO:	QUERY:	ENSMUSG00000031489	ADRB3	adrenergic receptor, beta 3 [Source:MGI Symbol;Acc:MGI:87939]
#INFO:	QUERY:	ENSMUSG00000066800	RNASEL	ribonuclease L (2', 5'-oligoisoadenylate synthetase-dependent) [Source:MGI Symbol;Acc:MGI:1098272]
#INFO:	QUERY:	ENSMUSG00000105609	GM42501	predicted gene 42501 [Source:MGI Symbol;Acc:MGI:5662638]
#INFO:	QUERY:	ENSMUSG00000105460	GM42671	predicted gene 42671 [Source:MGI Symbol;Acc:MGI:5662808]
#INFO:	QUERY:	ENSMUSG00000104588	GM43666	predicted gene 43666 [Source:MGI Symbol;Acc:MGI:5663803]
#INFO:	QUERY:	ENSMUSG00000097993	PTPRV	protein tyrosine phosphatase, receptor type, V [Source:MGI Symbol;Acc:MGI:108027]
#INFO:	QUERY:	ENSMUSG00000032226	GCNT3	glucosaminyl (N-acetyl) transferase 3, mucin type [Source:MGI Symbol;Acc:MGI:1919327]
#INFO:	QUERY:	ENSMUSG00000073761	4933427I04RIK	Riken cDNA 4933427I04 gene [Source:MGI Symbol;Acc:MGI:3613760]
#INFO:	QUERY:	ENSMUSG00000095409	GM13043	predicted gene 13043 [Source:MGI Symbol;Acc:MGI:3649500]
#INFO:	QUERY:	ENSMUSG00000052234	EPX	eosinophil peroxidase [Source:MGI Symbol;Acc:MGI:107569]
#INFO:	QUERY:	ENSMUSG00000105206	GM4870	predicted gene 4870 [Source:MGI Symbol;Acc:MGI:3779442]
#INFO:	QUERY:	ENSMUSG00000036832	LPAR3	lysophosphatidic acid receptor 3 [Source:MGI Symbol;Acc:MGI:1929469]
#INFO:	QUERY:	ENSMUSG00000085625	GM8813	predicted gene 8813 [Source:MGI Symbol;Acc:MGI:3645282]
#INFO:	QUERY:	ENSMUSG00000102408	4930568G15RIK	RIKEN cDNA 4930568G15 gene [Source:MGI Symbol;Acc:MGI:1923107]
#INFO:	QUERY:	ENSMUSG00000001918	SLC1A5	solute carrier family 1 (neutral amino acid transporter), member 5 [Source:MGI Symbol;Acc:MGI:105305]
#INFO:	QUERY:	ENSMUSG00000090690	GM8020	predicted gene 8020 [Source:MGI Symbol;Acc:MGI:3647991]
#INFO:	QUERY:	ENSMUSG00000032327	STRA6	stimulated by retinoic acid gene 6 [Source:MGI Symbol;Acc:MGI:107742]
#INFO:	QUERY:	ENSMUSG00000074825	ITPRIPL1	inositol 1,4,5-triphosphate receptor interacting protein-like 1 [Source:MGI Symbol;Acc:MGI:1920588]
#INFO:	QUERY:	ENSMUSG00000025515	MUC2	mucin 2 [Source:MGI Symbol;Acc:MGI:1339364]
#INFO:	QUERY:	ENSMUSG00000047407	TGIF1	TGFB-induced factor homeobox 1 [Source:MGI Symbol;Acc:MGI:1194497]
#INFO:	QUERY:	ENSMUSG00000006445	EPHA2	Eph receptor A2 [Source:MGI Symbol;Acc:MGI:95278]
#INFO:	QUERY:	ENSMUSG00000081965	GM11620	predicted gene 11620 [Source:MGI Symbol;Acc:MGI:3650770]
#INFO:	QUERY:	ENSMUSG00000107017	GM43196	predicted gene 43196 [Source:MGI Symbol;Acc:MGI:5663333]
#INFO:	QUERY:	ENSMUSG00000037913	TMEM156	transmembrane protein 156 [Source:MGI Symbol;Acc:MGI:2685292]
#INFO:	QUERY:	ENSMUSG00000054435	GIMAP4	GTPase, IMAP family member 4 [Source:MGI Symbol;Acc:MGI:1349656]
#INFO:	QUERY:	ENSMUSG00000083613	POU2F3-RS1	POU domain, class 2, transcription factor 3, related sequence 1 [Source:MGI Symbol;Acc:MGI:103144]
#INFO:	QUERY:	ENSMUSG00000108947	OLFR1422-PS1	olfactory receptor 1422, pseudogene 1 [Source:MGI Symbol;Acc:MGI:3031256]
#INFO:	QUERY:	ENSMUSG00000093871	GM4187	predicted gene 4187 [Source:MGI Symbol;Acc:MGI:3782363]
#INFO:	QUERY:	ENSMUSG00000095745	GM4133	predicted gene 4133 [Source:MGI Symbol;Acc:MGI:3782309]
#INFO:	QUERY:	ENSMUSG00000087518	GM13561	predicted gene 13561 [Source:MGI Symbol;Acc:MGI:3651674]
#INFO:	QUERY:	ENSMUSG00000086513	9130208D14RIK	RIKEN cDNA 9130208D14 gene [Source:MGI Symbol;Acc:MGI:1924950]
#INFO:	QUERY:	ENSMUSG00000100857	1700041M19RIK	RIKEN cDNA 1700041M19 gene [Source:MGI Symbol;Acc:MGI:1923851]
#INFO:	QUERY:	ENSMUSG00000082013	GM13216	predicted gene 13216 [Source:MGI Symbol;Acc:MGI:3651709]
#INFO:	QUERY:	ENSMUSG00000051735	RINL	Ras and Rab interactor-like [Source:MGI Symbol;Acc:MGI:2444024]
#INFO:	QUERY:	ENSMUSG00000087166	L1TD1	LINE-1 type transposase domain containing 1 [Source:MGI Symbol;Acc:MGI:3578435]
#INFO:	QUERY:	ENSMUSG00000002057	FOXN1	forkhead box N1 [Source:MGI Symbol;Acc:MGI:102949]
#INFO:	QUERY:	ENSMUSG00000037579	KCNH3	potassium voltage-gated channel, subfamily H (eag-related), member 3 [Source:MGI Symbol;Acc:MGI:1341723]
#INFO:	QUERY:	ENSMUSG00000073969	OLFR556	olfactory receptor 556 [Source:MGI Symbol;Acc:MGI:3030390]
#INFO:	QUERY:	ENSMUSG00000054342	KCNN4	potassium intermediate/small conductance calcium-activated channel, subfamily N, member 4 [Source:MGI Symbol;Acc:MGI:1277957]
#INFO:	QUERY:	ENSMUSG00000049241	HCAR1	hydrocarboxylic acid receptor 1 [Source:MGI Symbol;Acc:MGI:2441671]
#INFO:	QUERY:	ENSMUSG00000075335	4930588K23RIK	RIKEN cDNA 4930588K23 gene [Source:MGI Symbol;Acc:MGI:3588254]
#INFO:	QUERY:	ENSMUSG00000079259	TRIM71	tripartite motif-containing 71 [Source:MGI Symbol;Acc:MGI:2685973]
#INFO:	QUERY:	ENSMUSG00000046714	FOXC2	forkhead box C2 [Source:MGI Symbol;Acc:MGI:1347481]
#INFO:	QUERY:	ENSMUSG00000078509	PRAMEF17	PRAME family member 17 [Source:MGI Symbol;Acc:MGI:3650199]
#INFO:	QUERY:	ENSMUSG00000052912	SMARCA5-PS	SWI/SNF related, matrix associated, actin depenent ragulator of chromatin, subfamily a, member 5, pseudogene [Source:MGI Symbol;Acc:MGI:2443330]
#INFO:	QUERY:	ENSMUSG00000109058	OLFR705	olfactory receptor 705 [Source:MGI Symbol;Acc:MGI:3030539]
#INFO:	QUERY:	ENSMUSG00000101948	GM4557	predicted gene 4557 [Source:MGI Symbol;Acc:MGI:3782741]
#INFO:	QUERY:	ENSMUSG00000086386	GM12108	predicted gene 12108 [Source:MGI Symbol;Acc:MGI:3651176]
#INFO:	QUERY:	ENSMUSG00000075072	OLFR48	olfactory receptor 48 [Source:MGI Symbol;Acc:MGI:1333765]
#INFO:	QUERY:	ENSMUSG00000087116	GM12324	predicted gene 12324 [Source:MGI Symbol;Acc:MGI:3651352]
#INFO:	QUERY:	ENSMUSG00000103096	GM8022	predicted gene 8022 [Source:MGI Symbol;Acc:MGI:3647993]
#INFO:	QUERY:	ENSMUSG00000109200	GM44969	predicted gene 44969 [Source:MGI Symbol;Acc:MGI:5753545]
#INFO:	QUERY:	ENSMUSG00000075105	OLFR1218	olfactory receptor 1218 [Source:MGI Symbol;Acc:MGI:3031052]
#INFO:	QUERY:	ENSMUSG00000075524	4930407I10RIK	RIKEN cDNA 4930407I10 gene [Source:MGI Symbol;Acc:MGI:2685593]
#INFO:	QUERY:	ENSMUSG00000103475	GM37697	predicted gene, 37697 [Source:MGI Symbol;Acc:MGI:5610925]
#INFO:	QUERY:	ENSMUSG00000095190	GM10668	predicted gene 10668 [Source:MGI Symbol;Acc:MGI:3642587]
#INFO:	QUERY:	ENSMUSG00000095363	GM4567	predicted gene 4567 [Source:MGI Symbol;Acc:MGI:3809658]
#INFO:	QUERY:	ENSMUSG00000087032	GM13874	predicted gene 13874 [Source:MGI Symbol;Acc:MGI:3650729]
#INFO:	QUERY:	ENSMUSG00000034394	LIF	leukemia inhibitory factor [Source:MGI Symbol;Acc:MGI:96787]
#INFO:	QUERY:	ENSMUSG00000021565	SLC6A19	solute carrier family 6 (neurotransmitter transporter), member 19 [Source:MGI Symbol;Acc:MGI:1921588]
#INFO:	QUERY:	ENSMUSG00000032068	PLET1	placenta expressed transcript 1 [Source:MGI Symbol;Acc:MGI:1923759]
#INFO:	QUERY:	ENSMUSG00000107093	GM43452	predicted gene 43452 [Source:MGI Symbol;Acc:MGI:5663589]
#INFO:	QUERY:	ENSMUSG00000044581	4932415D10RIK	RIKEN cDNA 4932415D10 gene [Source:MGI Symbol;Acc:MGI:3045298]
#INFO:	QUERY:	ENSMUSG00000103119	GM37583	predicted gene, 37583 [Source:MGI Symbol;Acc:MGI:5610811]
#INFO:	QUERY:	ENSMUSG00000101750	OLFR1392	olfactory receptor 1392 [Source:MGI Symbol;Acc:MGI:3031226]
#INFO:	QUERY:	ENSMUSG00000102109	GM29563	predicted gene 29563 [Source:MGI Symbol;Acc:MGI:5580269]
#INFO:	QUERY:	ENSMUSG00000018819	LSP1	lymphocyte specific 1 [Source:MGI Symbol;Acc:MGI:96832]
#INFO:	QUERY:	ENSMUSG00000085582	3110099E03RIK	RIKEN cDNA 3110099E03 gene [Source:MGI Symbol;Acc:MGI:1925761]
#INFO:	QUERY:	ENSMUSG00000090722	GM8378	predicted gene 8378 [Source:MGI Symbol;Acc:MGI:3646777]
#INFO:	QUERY:	ENSMUSG00000021356	IRF4	interferon regulatory factor 4 [Source:MGI Symbol;Acc:MGI:1096873]
#INFO:	QUERY:	ENSMUSG00000105737	GM6105	predicted gene 6105 [Source:MGI Symbol;Acc:MGI:3649051]
#INFO:	QUERY:	ENSMUSG00000104376	GM37516	predicted gene, 37516 [Source:MGI Symbol;Acc:MGI:5610744]
#INFO:	QUERY:	ENSMUSG00000107371	GM43784	predicted gene 43784 [Source:MGI Symbol;Acc:MGI:5663921]
#INFO:	QUERY:	ENSMUSG00000107164	4933425D22RIK	RIKEN cDNA 4933425D22 gene [Source:MGI Symbol;Acc:MGI:1914009]
#INFO:	QUERY:	ENSMUSG00000046678	OLFR981	olfactory receptor 981 [Source:MGI Symbol;Acc:MGI:3030815]
#INFO:	QUERY:	ENSMUSG00000085139	A730046J19RIK	RIKEN cDNA A730046J19 gene [Source:MGI Symbol;Acc:MGI:2442684]
#INFO:	QUERY:	ENSMUSG00000087226	GM14015	predicted gene 14015 [Source:MGI Symbol;Acc:MGI:3649269]
#INFO:	QUERY:	ENSMUSG00000057751	MEGF6	multiple EGF-like-domains 6 [Source:MGI Symbol;Acc:MGI:1919351]
#INFO:	QUERY:	ENSMUSG00000026931	1700019N19RIK	RIKEN cDNA 1700019N19 gene [Source:MGI Symbol;Acc:MGI:1914757]
#INFO:	QUERY:	ENSMUSG00000097843	GM26755	predicted gene, 26755 [Source:MGI Symbol;Acc:MGI:5477249]
#INFO:	QUERY:	ENSMUSG00000026983	IL1F5	interleukin 1 family, member 5 (delta) [Source:MGI Symbol;Acc:MGI:1859325]
#INFO:	QUERY:	ENSMUSG00000105739	GM5708	predicted gene 5708 [Source:MGI Symbol;Acc:MGI:3647478]
#INFO:	QUERY:	ENSMUSG00000090012	GM16555	predicted gene 16555 [Source:MGI Symbol;Acc:MGI:4414975]
#INFO:	QUERY:	ENSMUSG00000106013	4933402J10RIK	RIKEN cDNA 4933402J10 gene [Source:MGI Symbol;Acc:MGI:1918307]
#INFO:	QUERY:	ENSMUSG00000036813	ENTPD8	ectonucleoside triphosphate diphosphohydrolase 8 [Source:MGI Symbol;Acc:MGI:1919340]
#INFO:	QUERY:	ENSMUSG00000103358	GM37593	predicted gene, 37593 [Source:MGI Symbol;Acc:MGI:5610821]
#INFO:	QUERY:	ENSMUSG00000106865	4930519E07RIK	RIKEN cDNA 4930519E07 gene [Source:MGI Symbol;Acc:MGI:1921963]
#INFO:	QUERY:	ENSMUSG00000085184	4933439K11RIK	RIKEN cDNA 4933439K11 gene [Source:MGI Symbol;Acc:MGI:1918569]
#INFO:	QUERY:	ENSMUSG00000026604	PTPN14	protein tyrosine phosphatase, non-receptor type 14 [Source:MGI Symbol;Acc:MGI:102467]
#INFO:	QUERY:	ENSMUSG00000073937	OLFR633	olfactory receptor 633 [Source:MGI Symbol;Acc:MGI:3030467]
#INFO:	QUERY:	ENSMUSG00000107005	9030607J07RIK	RIKEN cDNA 9030607J07 gene [Source:MGI Symbol;Acc:MGI:1918776]
#INFO:	QUERY:	ENSMUSG00000105282	GM42981	predicted gene 42981 [Source:MGI Symbol;Acc:MGI:5663118]
#INFO:	QUERY:	ENSMUSG00000078817	NLRP12	NLR family, pyrin domain containing 12 [Source:MGI Symbol;Acc:MGI:2676630]
#INFO:	QUERY:	ENSMUSG00000047986	PALM3	paralemmin 3 [Source:MGI Symbol;Acc:MGI:1921587]
#INFO:	QUERY:	ENSMUSG00000104310	GM4081	predicted gene 4081 [Source:MGI Symbol;Acc:MGI:3782256]
#INFO:	QUERY:	ENSMUSG00000103445	GM36948	predicted gene, 36948 [Source:MGI Symbol;Acc:MGI:5610176]
#INFO:	QUERY:	ENSMUSG00000099647	GM5776	predicted gene 5776 [Source:MGI Symbol;Acc:MGI:3647650]
#INFO:	QUERY:	ENSMUSG00000071104	CCDC110	coiled-coil domain containing 110 [Source:MGI Symbol;Acc:MGI:2685018]
#INFO:	QUERY:	ENSMUSG00000094084	TDPOZ1	TD and POZ domain containing 1 [Source:MGI Symbol;Acc:MGI:2449436]
#INFO:	QUERY:	ENSMUSG00000074345	TNFAIP8L3	tumor necrosis factor, alpha-induced protein 8-like 3 [Source:MGI Symbol;Acc:MGI:2685363]
#INFO:	QUERY:	ENSMUSG00000091401	GM9252	predicted gene 9252 [Source:MGI Symbol;Acc:MGI:3645130]
#INFO:	QUERY:	ENSMUSG00000104601	GM29745	predicted gene, 29745 [Source:MGI Symbol;Acc:MGI:5588904]
#INFO:	QUERY:	ENSMUSG00000032815	FANCA	Fanconi anemia, complementation group A [Source:MGI Symbol;Acc:MGI:1341823]
#INFO:	QUERY:	ENSMUSG00000044534	ACKR2	atypical chemokine receptor 2 [Source:MGI Symbol;Acc:MGI:1891697]
#INFO:	QUERY:	ENSMUSG00000029177	CENPA	centromere protein A [Source:MGI Symbol;Acc:MGI:88375]
#INFO:	QUERY:	ENSMUSG00000053368	RXFP2	relaxin/insulin-like family peptide receptor 2 [Source:MGI Symbol;Acc:MGI:2153463]
#INFO:	QUERY:	ENSMUSG00000081302	GM12020	predicted gene 12020 [Source:MGI Symbol;Acc:MGI:3650978]
#INFO:	QUERY:	ENSMUSG00000035279	SSC5D	scavenger receptor cysteine rich family, 5 domains [Source:MGI Symbol;Acc:MGI:3606211]
#INFO:	QUERY:	ENSMUSG00000016024	LBP	lipopolysaccharide binding protein [Source:MGI Symbol;Acc:MGI:1098776]
#INFO:	QUERY:	ENSMUSG00000047728	BC025446	cDNA sequence BC025446 [Source:MGI Symbol;Acc:MGI:2385015]
#INFO:	QUERY:	ENSMUSG00000101009	1700108F19RIK	RIKEN cDNA 1700108F19 gene [Source:MGI Symbol;Acc:MGI:1920814]
#INFO:	QUERY:	ENSMUSG00000074063	OSGIN1	oxidative stress induced growth inhibitor 1 [Source:MGI Symbol;Acc:MGI:1919089]
#INFO:	QUERY:	ENSMUSG00000102692	DCHS2	dachsous 2 (Drosophila) [Source:MGI Symbol;Acc:MGI:2685263]
#INFO:	QUERY:	ENSMUSG00000108383	GM6567	predicted gene 6567 [Source:MGI Symbol;Acc:MGI:3779609]
#INFO:	QUERY:	ENSMUSG00000030650	TMC5	transmembrane channel-like gene family 5 [Source:MGI Symbol;Acc:MGI:1921674]
#INFO:	QUERY:	ENSMUSG00000029005	DRAXIN	dorsal inhibitory axon guidance protein [Source:MGI Symbol;Acc:MGI:1917683]
#INFO:	QUERY:	ENSMUSG00000080872	GM11506	predicted gene 11506 [Source:MGI Symbol;Acc:MGI:3650724]
#INFO:	QUERY:	ENSMUSG00000090863	A530084C06RIK	RIKEN cDNA A530084C06 gene [Source:MGI Symbol;Acc:MGI:3704402]
#INFO:	QUERY:	ENSMUSG00000046610	OACYL	O-acyltransferase like [Source:MGI Symbol;Acc:MGI:2442915]
#INFO:	QUERY:	ENSMUSG00000044923	OLFR1030	olfactory receptor 1030 [Source:MGI Symbol;Acc:MGI:3030864]
#INFO:	QUERY:	ENSMUSG00000096477	OLFR92	olfactory receptor 92 [Source:MGI Symbol;Acc:MGI:2177475]
#INFO:	QUERY:	ENSMUSG00000025905	OPRK1	opioid receptor, kappa 1 [Source:MGI Symbol;Acc:MGI:97439]
#INFO:	QUERY:	ENSMUSG00000080995	GM15165	predicted gene 15165 [Source:MGI Symbol;Acc:MGI:3705368]
#INFO:	QUERY:	ENSMUSG00000100291	2310069B03RIK	RIKEN cDNA 2310069B03 gene [Source:MGI Symbol;Acc:MGI:1916902]
#INFO:	QUERY:	ENSMUSG00000072952	GM5878	predicted gene 5878 [Source:MGI Symbol;Acc:MGI:3647625]
#INFO:	QUERY:	ENSMUSG00000074480	MEX3A	mex3 RNA binding family member A [Source:MGI Symbol;Acc:MGI:1919890]
#INFO:	QUERY:	ENSMUSG00000073608	GAL3ST2C	galactose-3-O-sulfotransferase 2C [Source:MGI Symbol;Acc:MGI:3646771]
#INFO:	QUERY:	ENSMUSG00000040164	KCNS1	K+ voltage-gated channel, subfamily S, 1 [Source:MGI Symbol;Acc:MGI:1197019]
#INFO:	QUERY:	ENSMUSG00000105916	GM42453	predicted gene 42453 [Source:MGI Symbol;Acc:MGI:5662590]
#INFO:	QUERY:	ENSMUSG00000107413	GM20553	predicted gene, 20553 [Source:MGI Symbol;Acc:MGI:5295660]
#INFO:	QUERY:	ENSMUSG00000045350	FAM186A	family with sequence similarity 186, member A [Source:MGI Symbol;Acc:MGI:2685766]
#INFO:	QUERY:	ENSMUSG00000097301	AW121686	expressed sequence AW121686 [Source:MGI Symbol;Acc:MGI:2146194]
#INFO:	QUERY:	ENSMUSG00000102676	GM37435	predicted gene, 37435 [Source:MGI Symbol;Acc:MGI:5610663]
#INFO:	QUERY:	ENSMUSG00000107434	GM4640	predicted gene 4640 [Source:MGI Symbol;Acc:MGI:3782822]
#INFO:	QUERY:	ENSMUSG00000108530	4930429H19RIK	RIKEN cDNA 4930429H19 gene [Source:MGI Symbol;Acc:MGI:1921147]
#INFO:	QUERY:	ENSMUSG00000068809	OLFR1188	olfactory receptor 1188 [Source:MGI Symbol;Acc:MGI:3031022]
#INFO:	QUERY:	ENSMUSG00000087513	GM13236	predicted gene 13236 [Source:MGI Symbol;Acc:MGI:3705163]
#INFO:	QUERY:	ENSMUSG00000030474	SIGLECE	sialic acid binding Ig-like lectin E [Source:MGI Symbol;Acc:MGI:1932475]
#INFO:	QUERY:	ENSMUSG00000094910	D430019H16RIK	RIKEN cDNA D430019H16 gene [Source:MGI Symbol;Acc:MGI:2443127]
#INFO:	QUERY:	ENSMUSG00000084182	TAAR7C-PS	trace amine-associated receptor 7C, pseudogene [Source:MGI Symbol;Acc:MGI:3527440]
#INFO:	QUERY:	ENSMUSG00000012428	STEAP4	STEAP family member 4 [Source:MGI Symbol;Acc:MGI:1923560]
#INFO:	QUERY:	ENSMUSG00000025082	VWA2	von Willebrand factor A domain containing 2 [Source:MGI Symbol;Acc:MGI:2684334]
#INFO:	QUERY:	ENSMUSG00000104931	IGKV1-136	immunoglobulin kappa chain variable 1-136 [Source:MGI Symbol;Acc:MGI:4947614]
#INFO:	QUERY:	ENSMUSG00000036961	WNT8B	wingless-type MMTV integration site family, member 8B [Source:MGI Symbol;Acc:MGI:109485]
#INFO:	QUERY:	ENSMUSG00000075062	OLFR1271	olfactory receptor 1271 [Source:MGI Symbol;Acc:MGI:3031105]
#INFO:	QUERY:	ENSMUSG00000088439	GM25386	predicted gene, 25386 [Source:MGI Symbol;Acc:MGI:5455163]
#INFO:	QUERY:	ENSMUSG00000103958	GM8023	predicted gene 8023 [Source:MGI Symbol;Acc:MGI:3647988]
#INFO:	QUERY:	ENSMUSG00000048916	GM5540	predicted pseudogene 5540 [Source:MGI Symbol;Acc:MGI:3644824]
#INFO:	QUERY:	ENSMUSG00000109250	GM5053	predicted gene 5053 [Source:MGI Symbol;Acc:MGI:3645491]
#INFO:	QUERY:	ENSMUSG00000045928	4933440M02RIK	RIKEN cDNA 4933440M02 gene [Source:MGI Symbol;Acc:MGI:1918458]
#INFO:	QUERY:	ENSMUSG00000057722	LEPR	leptin receptor [Source:MGI Symbol;Acc:MGI:104993]
#INFO:	QUERY:	ENSMUSG00000073978	OLFR548-PS1	olfactory receptor 548, pseudogene 1 [Source:MGI Symbol;Acc:MGI:3030382]
#INFO:	QUERY:	ENSMUSG00000090891	D6ERTD527E	DNA segment, Chr 6, ERATO Doi 527, expressed [Source:MGI Symbol;Acc:MGI:1261919]
#INFO:	QUERY:	ENSMUSG00000020007	IL20RA	interleukin 20 receptor, alpha [Source:MGI Symbol;Acc:MGI:3605069]
#INFO:	QUERY:	ENSMUSG00000104046	GM37567	predicted gene, 37567 [Source:MGI Symbol;Acc:MGI:5610795]
#INFO:	QUERY:	ENSMUSG00000086788	1700029M20RIK	RIKEN cDNA 1700029M20 gene [Source:MGI Symbol;Acc:MGI:1913597]
#INFO:	QUERY:	ENSMUSG00000039337	TEX19.2	testis expressed gene 19.2 [Source:MGI Symbol;Acc:MGI:1918206]
#INFO:	QUERY:	ENSMUSG00000062515	FABP4	fatty acid binding protein 4, adipocyte [Source:MGI Symbol;Acc:MGI:88038]
#INFO:	QUERY:	ENSMUSG00000083171	GM12321	predicted gene 12321 [Source:MGI Symbol;Acc:MGI:3651559]
#INFO:	QUERY:	ENSMUSG00000108906	GM8314	predicted gene 8314 [Source:MGI Symbol;Acc:MGI:3646690]
#INFO:	QUERY:	ENSMUSG00000103733	GM6162	predicted gene 6162 [Source:MGI Symbol;Acc:MGI:3647648]
#INFO:	QUERY:	ENSMUSG00000045202	OLFR123	olfactory receptor 123 [Source:MGI Symbol;Acc:MGI:2177506]
#INFO:	QUERY:	ENSMUSG00000001665	GSTT3	glutathione S-transferase, theta 3 [Source:MGI Symbol;Acc:MGI:2143526]
#INFO:	QUERY:	ENSMUSG00000097083	D930019O06RIK	RIKEN cDNA D930019O06 [Source:MGI Symbol;Acc:MGI:3043219]
#INFO:	QUERY:	ENSMUSG00000086407	GM14123	predicted gene 14123 [Source:MGI Symbol;Acc:MGI:3650509]
#INFO:	QUERY:	ENSMUSG00000074420	GM10693	predicted pseudogene 10693 [Source:MGI Symbol;Acc:MGI:3704277]
#INFO:	QUERY:	ENSMUSG00000042677	ZC3H12A	zinc finger CCCH type containing 12A [Source:MGI Symbol;Acc:MGI:2385891]
#INFO:	QUERY:	ENSMUSG00000052295	8030423F21RIK	RIKEN cDNA 8030423F21 gene [Source:MGI Symbol;Acc:MGI:2443206]
#INFO:	QUERY:	ENSMUSG00000045322	TLR9	toll-like receptor 9 [Source:MGI Symbol;Acc:MGI:1932389]
#INFO:	QUERY:	ENSMUSG00000101291	GM29194	predicted gene 29194 [Source:MGI Symbol;Acc:MGI:5579900]
#INFO:	QUERY:	ENSMUSG00000099657	GM28667	predicted gene 28667 [Source:MGI Symbol;Acc:MGI:5579373]
#INFO:	QUERY:	ENSMUSG00000085563	2210411M09RIK	RIKEN cDNA 2210411M09 gene [Source:MGI Symbol;Acc:MGI:1917426]
#INFO:	QUERY:	ENSMUSG00000017756	SLC12A7	solute carrier family 12, member 7 [Source:MGI Symbol;Acc:MGI:1342283]
#INFO:	QUERY:	ENSMUSG00000106671	GM42900	predicted gene 42900 [Source:MGI Symbol;Acc:MGI:5663037]
#INFO:	QUERY:	ENSMUSG00000042414	PRDM14	PR domain containing 14 [Source:MGI Symbol;Acc:MGI:3588194]
#INFO:	QUERY:	ENSMUSG00000053461	HHIPL2	hedgehog interacting protein-like 2 [Source:MGI Symbol;Acc:MGI:1926022]
#INFO:	QUERY:	ENSMUSG00000099886	GM2324	predicted gene 2324 [Source:MGI Symbol;Acc:MGI:3780494]
#INFO:	QUERY:	ENSMUSG00000029868	TRPV6	transient receptor potential cation channel, subfamily V, member 6 [Source:MGI Symbol;Acc:MGI:1927259]
#INFO:	QUERY:	ENSMUSG00000047492	INHBE	inhibin beta-E [Source:MGI Symbol;Acc:MGI:109269]
#INFO:	QUERY:	ENSMUSG00000081439	GM7840	predicted gene 7840 [Source:MGI Symbol;Acc:MGI:3644051]
#INFO:	QUERY:	ENSMUSG00000050600	ZFP831	zinc finger protein 831 [Source:MGI Symbol;Acc:MGI:3641861]
#INFO:	QUERY:	ENSMUSG00000048852	GM12185	predicted gene 12185 [Source:MGI Symbol;Acc:MGI:3652173]
#INFO:	QUERY:	ENSMUSG00000044694	2010007H06RIK	RIKEN cDNA 2010007H06 gene [Source:MGI Symbol;Acc:MGI:1917099]
#INFO:	QUERY:	ENSMUSG00000087461	C230014O12RIK	RIKEN cDNA C230014O12 gene [Source:MGI Symbol;Acc:MGI:3045377]
#INFO:	QUERY:	ENSMUSG00000042189	TEKT3	tektin 3 [Source:MGI Symbol;Acc:MGI:1918312]
#INFO:	QUERY:	ENSMUSG00000099102	GM11983	predicted gene 11983 [Source:MGI Symbol;Acc:MGI:3650519]
#INFO:	QUERY:	ENSMUSG00000097476	GM26583	predicted gene, 26583 [Source:MGI Symbol;Acc:MGI:5477077]
#INFO:	QUERY:	ENSMUSG00000091076	VMN2R115	vomeronasal 2, receptor 115 [Source:MGI Symbol;Acc:MGI:3647235]
#INFO:	QUERY:	ENSMUSG00000026420	IL24	interleukin 24 [Source:MGI Symbol;Acc:MGI:2135548]
#INFO:	QUERY:	ENSMUSG00000049796	CRH	corticotropin releasing hormone [Source:MGI Symbol;Acc:MGI:88496]
#INFO:	QUERY:	ENSMUSG00000043953	CCRL2	chemokine (C-C motif) receptor-like 2 [Source:MGI Symbol;Acc:MGI:1920904]
#INFO:	QUERY:	ENSMUSG00000030402	PPM1N	protein phosphatase, Mg2+/Mn2+ dependent, 1N (putative) [Source:MGI Symbol;Acc:MGI:2142330]
#INFO:	QUERY:	ENSMUSG00000078632	LRRC37A	leucine rich repeat containing 37A [Source:MGI Symbol;Acc:MGI:2685097]
#INFO:	QUERY:	ENSMUSG00000109384	GM17931	predicted gene, 17931 [Source:MGI Symbol;Acc:MGI:5010116]
#INFO:	QUERY:	ENSMUSG00000038192	CER1	cerberus 1, DAN family BMP antagonist [Source:MGI Symbol;Acc:MGI:1201414]
#INFO:	QUERY:	ENSMUSG00000108811	4933432K03RIK	RIKEN cDNA 4933432K03 gene [Source:MGI Symbol;Acc:MGI:1918562]
#INFO:	QUERY:	ENSMUSG00000037014	SSTR4	somatostatin receptor 4 [Source:MGI Symbol;Acc:MGI:105372]
#INFO:	QUERY:	ENSMUSG00000086822	5330413P13RIK	RIKEN cDNA 5330413P13 gene [Source:MGI Symbol;Acc:MGI:3041161]
#INFO:	QUERY:	ENSMUSG00000102569	GM37041	predicted gene, 37041 [Source:MGI Symbol;Acc:MGI:5610269]
#INFO:	QUERY:	ENSMUSG00000050813	OLFR332	olfactory receptor 332 [Source:MGI Symbol;Acc:MGI:3030166]
#INFO:	QUERY:	ENSMUSG00000096706	GM21854	predicted gene, 21854 [Source:MGI Symbol;Acc:MGI:5434018]
#INFO:	QUERY:	ENSMUSG00000101849	GM28386	predicted gene 28386 [Source:MGI Symbol;Acc:MGI:5579092]
#INFO:	QUERY:	ENSMUSG00000097821	C130032M10RIK	RIKEN cDNA C130032M10 gene [Source:MGI Symbol;Acc:MGI:3642482]
#INFO:	QUERY:	ENSMUSG00000083253	GM7108	predicted gene 7108 [Source:MGI Symbol;Acc:MGI:3645440]
#INFO:	QUERY:	ENSMUSG00000105920	GM5408	predicted pseudogene 5408 [Source:MGI Symbol;Acc:MGI:3647344]
#INFO:	QUERY:	ENSMUSG00000053117	E330013P04RIK	RIKEN cDNA E330013P04 gene [Source:MGI Symbol;Acc:MGI:2147732]
#INFO:	QUERY:	ENSMUSG00000083136	GM15170	predicted gene 15170 [Source:MGI Symbol;Acc:MGI:3705718]
#INFO:	QUERY:	ENSMUSG00000095071	AF067061	cDNA sequence AF067061 [Source:MGI Symbol;Acc:MGI:2681166]
#INFO:	QUERY:	ENSMUSG00000098085	GM8919	predicted gene 8919 [Source:MGI Symbol;Acc:MGI:3643562]
#INFO:	QUERY:	ENSMUSG00000091577	GM6211	predicted gene 6211 [Source:MGI Symbol;Acc:MGI:3646534]
#INFO:	QUERY:	ENSMUSG00000063838	CDC42EP5	CDC42 effector protein (Rho GTPase binding) 5 [Source:MGI Symbol;Acc:MGI:1929745]
#INFO:	QUERY:	ENSMUSG00000106845	GM43156	predicted gene 43156 [Source:MGI Symbol;Acc:MGI:5663293]
#INFO:	QUERY:	ENSMUSG00000103877	GM21358	predicted gene, 21358 [Source:MGI Symbol;Acc:MGI:5434713]
#INFO:	QUERY:	ENSMUSG00000102629	GM29999	predicted gene, 29999 [Source:MGI Symbol;Acc:MGI:5589158]
#INFO:	QUERY:	ENSMUSG00000030562	NOX4	NADPH oxidase 4 [Source:MGI Symbol;Acc:MGI:1354184]
#INFO:	QUERY:	ENSMUSG00000070380	OLFR401	olfactory receptor 401 [Source:MGI Symbol;Acc:MGI:3030235]
#INFO:	QUERY:	ENSMUSG00000085546	GM14252	predicted gene 14252 [Source:MGI Symbol;Acc:MGI:3649403]
#INFO:	QUERY:	ENSMUSG00000089726	MIR17HG	Mir17 host gene (non-protein coding) [Source:MGI Symbol;Acc:MGI:1923207]
#INFO:	QUERY:	ENSMUSG00000102278	GM37145	predicted gene, 37145 [Source:MGI Symbol;Acc:MGI:5610373]
#INFO:	QUERY:	ENSMUSG00000085441	GM8289	predicted gene 8289 [Source:MGI Symbol;Acc:MGI:3645453]
#INFO:	QUERY:	ENSMUSG00000106036	GM43608	predicted gene 43608 [Source:MGI Symbol;Acc:MGI:5663745]
#INFO:	QUERY:	ENSMUSG00000097072	FOXL2OS	forkhead box L2, opposite strand [Source:MGI Symbol;Acc:MGI:3614944]
#INFO:	QUERY:	ENSMUSG00000104384	GM37031	predicted gene, 37031 [Source:MGI Symbol;Acc:MGI:5610259]
#INFO:	QUERY:	ENSMUSG00000106554	GM33474	predicted gene, 33474 [Source:MGI Symbol;Acc:MGI:5592633]
#INFO:	QUERY:	ENSMUSG00000070995	GM6313	predicted gene 6313 [Source:MGI Symbol;Acc:MGI:3644722]
#INFO:	QUERY:	ENSMUSG00000038224	SERPINF2	serine (or cysteine) peptidase inhibitor, clade F, member 2 [Source:MGI Symbol;Acc:MGI:107173]
#INFO:	QUERY:	ENSMUSG00000092014	GM4468	predicted gene 4468 [Source:MGI Symbol;Acc:MGI:3782652]
#INFO:	QUERY:	ENSMUSG00000041831	SYTL3	synaptotagmin-like 3 [Source:MGI Symbol;Acc:MGI:1933367]
#INFO:	QUERY:	ENSMUSG00000089888	GM16547	predicted gene 16547 [Source:MGI Symbol;Acc:MGI:4414967]
#INFO:	QUERY:	ENSMUSG00000101333	GM4753	predicted gene 4753 [Source:MGI Symbol;Acc:MGI:3648193]
#INFO:	QUERY:	ENSMUSG00000066652	LEFTY2	left-right determination factor 2 [Source:MGI Symbol;Acc:MGI:2443573]
#INFO:	QUERY:	ENSMUSG00000087168	GM15983	predicted gene 15983 [Source:MGI Symbol;Acc:MGI:3805549]
#INFO:	QUERY:	ENSMUSG00000057246	BC051142	cDNA sequence BC051142 [Source:MGI Symbol;Acc:MGI:3039565]
#INFO:	QUERY:	ENSMUSG00000097900	GM8652	predicted gene 8652 [Source:MGI Symbol;Acc:MGI:3643616]
#INFO:	QUERY:	ENSMUSG00000074804	AU015228	expressed sequence AU015228 [Source:MGI Symbol;Acc:MGI:2139152]
#INFO:	QUERY:	ENSMUSG00000103325	GM10531	predicted gene 10531 [Source:MGI Symbol;Acc:MGI:3641983]
#INFO:	QUERY:	ENSMUSG00000031004	MKI67	antigen identified by monoclonal antibody Ki 67 [Source:MGI Symbol;Acc:MGI:106035]
#INFO:	QUERY:	ENSMUSG00000079173	ZAN	zonadhesin [Source:MGI Symbol;Acc:MGI:106656]
#INFO:	QUERY:	ENSMUSG00000056972	MAGEL2	melanoma antigen, family L, 2 [Source:MGI Symbol;Acc:MGI:1351648]
#INFO:	QUERY:	ENSMUSG00000038242	AOX4	aldehyde oxidase 4 [Source:MGI Symbol;Acc:MGI:1919122]
#INFO:	QUERY:	ENSMUSG00000102715	GM6209	predicted gene 6209 [Source:MGI Symbol;Acc:MGI:3643374]
#INFO:	QUERY:	ENSMUSG00000090145	UGT1A6B	UDP glucuronosyltransferase 1 family, polypeptide A6B [Source:MGI Symbol;Acc:MGI:3580629]
#INFO:	QUERY:	ENSMUSG00000099660	GM2316	predicted gene 2316 [Source:MGI Symbol;Acc:MGI:3780487]
#INFO:	QUERY:	ENSMUSG00000103192	GM37645	predicted gene, 37645 [Source:MGI Symbol;Acc:MGI:5610873]
#INFO:	QUERY:	ENSMUSG00000029521	CHEK2	checkpoint kinase 2 [Source:MGI Symbol;Acc:MGI:1355321]
#INFO:	QUERY:	ENSMUSG00000092054	KIF4-PS	kinesin family member 4, pseudogene [Source:MGI Symbol;Acc:MGI:1922197]
#INFO:	QUERY:	ENSMUSG00000058537	AW822073	expressed sequence AW822073 [Source:MGI Symbol;Acc:MGI:3034577]
#INFO:	QUERY:	ENSMUSG00000003545	FOSB	FBJ osteosarcoma oncogene B [Source:MGI Symbol;Acc:MGI:95575]
#INFO:	QUERY:	ENSMUSG00000070337	GPR179	G protein-coupled receptor 179 [Source:MGI Symbol;Acc:MGI:2443409]
#INFO:	QUERY:	ENSMUSG00000094649	GM7102	predicted gene 7102 [Source:MGI Symbol;Acc:MGI:3648735]
#INFO:	QUERY:	ENSMUSG00000067356	B430203G13RIK	RIKEN cDNA B430203G13 gene [Source:MGI Symbol;Acc:MGI:3642832]
#INFO:	QUERY:	ENSMUSG00000090066	1110002E22RIK	RIKEN cDNA 1110002E22 gene [Source:MGI Symbol;Acc:MGI:1915066]
#INFO:	QUERY:	ENSMUSG00000033520	IDI2	isopentenyl-diphosphate delta isomerase 2 [Source:MGI Symbol;Acc:MGI:2444315]
#INFO:	QUERY:	ENSMUSG00000104667	GM4961	predicted pseudogene 4961 [Source:MGI Symbol;Acc:MGI:3645260]
#INFO:	QUERY:	ENSMUSG00000097368	GM10390	predicted gene 10390 [Source:MGI Symbol;Acc:MGI:3708725]
#INFO:	QUERY:	ENSMUSG00000044216	KCNJ4	potassium inwardly-rectifying channel, subfamily J, member 4 [Source:MGI Symbol;Acc:MGI:104743]
#INFO:	QUERY:	ENSMUSG00000100553	GM17751	predicted gene, 17751 [Source:MGI Symbol;Acc:MGI:5009832]
#INFO:	QUERY:	ENSMUSG00000040065	PFPL	pore forming protein-like [Source:MGI Symbol;Acc:MGI:1860266]
#INFO:	QUERY:	ENSMUSG00000026380	TFCP2L1	transcription factor CP2-like 1 [Source:MGI Symbol;Acc:MGI:2444691]
#INFO:	QUERY:	ENSMUSG00000108446	GM44997	predicted gene 44997 [Source:MGI Symbol;Acc:MGI:5753573]
#INFO:	QUERY:	ENSMUSG00000020323	PRSS57	protease, serine 57 [Source:MGI Symbol;Acc:MGI:1920356]
#INFO:	QUERY:	ENSMUSG00000090235	GM16244	predicted gene 16244 [Source:MGI Symbol;Acc:MGI:3802128]
#INFO:	QUERY:	ENSMUSG00000018776	SLC35G3	solute carrier family 35, member G3 [Source:MGI Symbol;Acc:MGI:1927128]
#INFO:	QUERY:	ENSMUSG00000067064	OLFR1416	olfactory receptor 1416 [Source:MGI Symbol;Acc:MGI:3031250]
#INFO:	QUERY:	ENSMUSG00000103883	GM37010	predicted gene, 37010 [Source:MGI Symbol;Acc:MGI:5610238]
#INFO:	QUERY:	ENSMUSG00000067526	OLFR1425	olfactory receptor 1425 [Source:MGI Symbol;Acc:MGI:3031259]
#INFO:	QUERY:	ENSMUSG00000101906	MRGPRC2-PS	MAS-related GPR, member C2, pseudogene [Source:MGI Symbol;Acc:MGI:3033137]
#INFO:	QUERY:	ENSMUSG00000108354	4931431B13RIK	RIKEN cDNA 4931431B13 gene [Source:MGI Symbol;Acc:MGI:1918223]
#INFO:	QUERY:	ENSMUSG00000031952	CHST5	carbohydrate (N-acetylglucosamine 6-O) sulfotransferase 5 [Source:MGI Symbol;Acc:MGI:1931825]
#INFO:	QUERY:	ENSMUSG00000037263	ALDH3B3	aldehyde dehydrogenase 3 family, member B3 [Source:MGI Symbol;Acc:MGI:1920708]
#INFO:	QUERY:	ENSMUSG00000104642	GM9207	predicted gene 9207 [Source:MGI Symbol;Acc:MGI:3779840]
#INFO:	QUERY:	ENSMUSG00000018907	ALOX12E	arachidonate lipoxygenase, epidermal [Source:MGI Symbol;Acc:MGI:1274790]
#INFO:	QUERY:	ENSMUSG00000085412	HALR1	Hoxa adjacent long noncoding RNA 1 [Source:MGI Symbol;Acc:MGI:3705267]
#INFO:	QUERY:	ENSMUSG00000035429	PTPRH	protein tyrosine phosphatase, receptor type, H [Source:MGI Symbol;Acc:MGI:3026877]
#INFO:	QUERY:	ENSMUSG00000045929	GM20715	predicted gene 20715 [Source:MGI Symbol;Acc:MGI:5313162]
#INFO:	QUERY:	ENSMUSG00000042353	FREM3	Fras1 related extracellular matrix protein 3 [Source:MGI Symbol;Acc:MGI:2685641]
#INFO:	QUERY:	ENSMUSG00000024565	SALL3	sal-like 3 (Drosophila) [Source:MGI Symbol;Acc:MGI:109295]
#INFO:	QUERY:	ENSMUSG00000092075	SERPINA4-PS1	serine (or cysteine) peptidase inhibitor, clade A, member 4, pseudogene 1 [Source:MGI Symbol;Acc:MGI:2448363]
#INFO:	QUERY:	ENSMUSG00000100811	GM29083	predicted gene 29083 [Source:MGI Symbol;Acc:MGI:5579789]
#INFO:	QUERY:	ENSMUSG00000044322	DSC1	desmocollin 1 [Source:MGI Symbol;Acc:MGI:109173]
#INFO:	QUERY:	ENSMUSG00000087422	GM13564	predicted gene 13564 [Source:MGI Symbol;Acc:MGI:3649652]
#INFO:	QUERY:	ENSMUSG00000075208	OLFR1019	olfactory receptor 1019 [Source:MGI Symbol;Acc:MGI:3030853]
#INFO:	QUERY:	ENSMUSG00000003436	DLL3	delta-like 3 (Drosophila) [Source:MGI Symbol;Acc:MGI:1096877]
#INFO:	QUERY:	ENSMUSG00000103609	GM37022	predicted gene, 37022 [Source:MGI Symbol;Acc:MGI:5610250]
#INFO:	QUERY:	ENSMUSG00000086474	9130204K15RIK	RIKEN cDNA 9130204K15 gene [Source:MGI Symbol;Acc:MGI:2441733]
#INFO:	QUERY:	ENSMUSG00000079168	CD209G	CD209g antigen [Source:MGI Symbol;Acc:MGI:1917442]
#INFO:	QUERY:	ENSMUSG00000109376	OLFR761	olfactory receptor 761 [Source:MGI Symbol;Acc:MGI:3030595]
#INFO:	QUERY:	ENSMUSG00000082786	GM14489	predicted gene 14489 [Source:MGI Symbol;Acc:MGI:3649726]
#INFO:	QUERY:	ENSMUSG00000094353	OLFR150	olfactory receptor 150 [Source:MGI Symbol;Acc:MGI:2659178]
#INFO:	QUERY:	ENSMUSG00000029134	PLB1	phospholipase B1 [Source:MGI Symbol;Acc:MGI:1922406]
#INFO:	QUERY:	ENSMUSG00000085891	GM14634	predicted gene 14634 [Source:MGI Symbol;Acc:MGI:3705147]
#INFO:	QUERY:	ENSMUSG00000030158	CLEC12B	C-type lectin domain family 12, member B [Source:MGI Symbol;Acc:MGI:1918433]
#INFO:	QUERY:	ENSMUSG00000087677	GM15226	predicted gene 15226 [Source:MGI Symbol;Acc:MGI:3705187]
#INFO:	QUERY:	ENSMUSG00000085731	GM16229	predicted gene 16229 [Source:MGI Symbol;Acc:MGI:3802021]
#INFO:	QUERY:	ENSMUSG00000107305	GM43262	predicted gene 43262 [Source:MGI Symbol;Acc:MGI:5663399]
#INFO:	QUERY:	ENSMUSG00000043099	HIC1	hypermethylated in cancer 1 [Source:MGI Symbol;Acc:MGI:1338010]
#INFO:	QUERY:	ENSMUSG00000108095	GM44067	predicted gene, 44067 [Source:MGI Symbol;Acc:MGI:5690459]
#INFO:	QUERY:	ENSMUSG00000093510	VMN2R-PS21	vomeronasal 2, receptor, pseudogene 21 [Source:MGI Symbol;Acc:MGI:3761376]
#INFO:	QUERY:	ENSMUSG00000027517	ANKRD60	ankyrin repeat domain 60 [Source:MGI Symbol;Acc:MGI:1917315]
#INFO:	QUERY:	ENSMUSG00000096950	GM9530	predicted gene 9530 [Source:MGI Symbol;Acc:MGI:3779939]
#INFO:	QUERY:	ENSMUSG00000063935	ZAR1	zygote arrest 1 [Source:MGI Symbol;Acc:MGI:2180337]
#INFO:	QUERY:	ENSMUSG00000050108	BPIFC	BPI fold containing family C [Source:MGI Symbol;Acc:MGI:3026884]
#INFO:	QUERY:	ENSMUSG00000041911	DLX1	distal-less homeobox 1 [Source:MGI Symbol;Acc:MGI:94901]
#INFO:	QUERY:	ENSMUSG00000040987	MILL2	MHC I like leukocyte 2 [Source:MGI Symbol;Acc:MGI:2179989]
#INFO:	QUERY:	ENSMUSG00000095301	OLFR476	olfactory receptor 476 [Source:MGI Symbol;Acc:MGI:3030310]
#INFO:	QUERY:	ENSMUSG00000107734	GM30055	predicted gene, 30055 [Source:MGI Symbol;Acc:MGI:5589214]
#INFO:	QUERY:	ENSMUSG00000027919	LCE1G	late cornified envelope 1G [Source:MGI Symbol;Acc:MGI:1913445]
#INFO:	QUERY:	ENSMUSG00000078737	GM2128	predicted gene 2128 [Source:MGI Symbol;Acc:MGI:3780298]
#INFO:	QUERY:	ENSMUSG00000044468	FAM46C	family with sequence similarity 46, member C [Source:MGI Symbol;Acc:MGI:1921895]
#INFO:	QUERY:	ENSMUSG00000078134	GM12355	predicted gene 12355 [Source:MGI Symbol;Acc:MGI:3649769]
#INFO:	QUERY:	ENSMUSG00000078962	4932414J04RIK	RIKEN cDNA 4932414J04 gene [Source:MGI Symbol;Acc:MGI:3605619]
#INFO:	QUERY:	ENSMUSG00000097108	GM26581	predicted gene, 26581 [Source:MGI Symbol;Acc:MGI:5477075]
#INFO:	QUERY:	ENSMUSG00000052316	LRRC15	leucine rich repeat containing 15 [Source:MGI Symbol;Acc:MGI:1921738]
#INFO:	QUERY:	ENSMUSG00000078251	GM16487	predicted gene 16487 [Source:MGI Symbol;Acc:MGI:3641811]
#INFO:	QUERY:	ENSMUSG00000089343	GM22667	predicted gene, 22667 [Source:MGI Symbol;Acc:MGI:5452444]
#INFO:	QUERY:	ENSMUSG00000097624	GM5091	predicted gene 5091 [Source:MGI Symbol;Acc:MGI:3779456]
#INFO:	QUERY:	ENSMUSG00000075140	OLFR73	olfactory receptor 73 [Source:MGI Symbol;Acc:MGI:2151908]
#INFO:	QUERY:	ENSMUSG00000080718	GM8019	predicted gene 8019 [Source:MGI Symbol;Acc:MGI:3645628]
#INFO:	QUERY:	ENSMUSG00000107145	GM43442	predicted gene 43442 [Source:MGI Symbol;Acc:MGI:5663579]
#INFO:	QUERY:	ENSMUSG00000108142	GM7498	predicted gene 7498 [Source:MGI Symbol;Acc:MGI:3646544]
#INFO:	QUERY:	ENSMUSG00000070547	MRGPRB1	MAS-related GPR, member B1 [Source:MGI Symbol;Acc:MGI:3033115]
#INFO:	QUERY:	ENSMUSG00000089952	4933413C19RIK	RIKEN cDNA 4933413C19 gene [Source:MGI Symbol;Acc:MGI:1921702]
#INFO:	QUERY:	ENSMUSG00000090631	OLFR456	olfactory receptor 456 [Source:MGI Symbol;Acc:MGI:3030290]
#INFO:	QUERY:	ENSMUSG00000027568	NTSR1	neurotensin receptor 1 [Source:MGI Symbol;Acc:MGI:97386]
#INFO:	QUERY:	ENSMUSG00000099901	ZBED4-PS2	zinc finger, BED type containing 4, pseudogene 2 [Source:MGI Symbol;Acc:MGI:5010917]
#INFO:	QUERY:	ENSMUSG00000054031	RDH18-PS	retinol dehydrogenase 18, pseudogene [Source:MGI Symbol;Acc:MGI:2687008]
#INFO:	QUERY:	ENSMUSG00000081522	GM13170	predicted gene 13170 [Source:MGI Symbol;Acc:MGI:3651095]
#INFO:	QUERY:	ENSMUSG00000045680	TCF21	transcription factor 21 [Source:MGI Symbol;Acc:MGI:1202715]
#INFO:	QUERY:	ENSMUSG00000005947	ITGAE	integrin alpha E, epithelial-associated [Source:MGI Symbol;Acc:MGI:1298377]
#INFO:	QUERY:	ENSMUSG00000041301	CFTR	cystic fibrosis transmembrane conductance regulator [Source:MGI Symbol;Acc:MGI:88388]
#INFO:	QUERY:	ENSMUSG00000095954	GM3183	predicted gene 3183 [Source:MGI Symbol;Acc:MGI:3781362]
#INFO:	QUERY:	ENSMUSG00000096957	E230013L22RIK	RIKEN cDNA E230013L22 gene [Source:MGI Symbol;Acc:MGI:2142601]
#INFO:	QUERY:	ENSMUSG00000022759	LRRC74B	leucine rich repeat containing 74B [Source:MGI Symbol;Acc:MGI:1921935]
#INFO:	QUERY:	ENSMUSG00000043740	B430306N03RIK	RIKEN cDNA B430306N03 gene [Source:MGI Symbol;Acc:MGI:2443478]
#INFO:	QUERY:	ENSMUSG00000043230	FAM124B	family with sequence similarity 124, member B [Source:MGI Symbol;Acc:MGI:3026880]
#INFO:	QUERY:	ENSMUSG00000046272	OLFR1444	olfactory receptor 1444 [Source:MGI Symbol;Acc:MGI:3031278]
#INFO:	QUERY:	ENSMUSG00000091311	SPATA31D1B	spermatogenesis associated 31 subfamily D, member 1B [Source:MGI Symbol;Acc:MGI:3646080]
#INFO:	QUERY:	ENSMUSG00000041567	SERPINA12	serine (or cysteine) peptidase inhibitor, clade A (alpha-1 antiproteinase, antitrypsin), member 12 [Source:MGI Symbol;Acc:MGI:1915304]
#INFO:	QUERY:	ENSMUSG00000055415	ATP10B	ATPase, class V, type 10B [Source:MGI Symbol;Acc:MGI:2442688]
#INFO:	QUERY:	ENSMUSG00000090619	VMN2R60	vomeronasal 2, receptor 60 [Source:MGI Symbol;Acc:MGI:3647050]
#INFO:	QUERY:	ENSMUSG00000105681	GM43428	predicted gene 43428 [Source:MGI Symbol;Acc:MGI:5663565]
#INFO:	QUERY:	ENSMUSG00000101517	4732465J04RIK	RIKEN cDNA 4732465J04 gene [Source:MGI Symbol;Acc:MGI:3041208]
#INFO:	QUERY:	ENSMUSG00000105261	GM43333	predicted gene 43333 [Source:MGI Symbol;Acc:MGI:5663470]
#INFO:	QUERY:	ENSMUSG00000033182	KBTBD12	kelch repeat and BTB (POZ) domain containing 12 [Source:MGI Symbol;Acc:MGI:1918481]
#INFO:	QUERY:	ENSMUSG00000102714	GM37618	predicted gene, 37618 [Source:MGI Symbol;Acc:MGI:5610846]
#INFO:	QUERY:	ENSMUSG00000050050	CCDC158	coiled-coil domain containing 158 [Source:MGI Symbol;Acc:MGI:2444555]
#INFO:	QUERY:	ENSMUSG00000101223	4930568A12RIK	RIKEN cDNA 4930568A12 gene [Source:MGI Symbol;Acc:MGI:1923133]
#INFO:	QUERY:	ENSMUSG00000021898	ASB14	ankyrin repeat and SOCS box-containing 14 [Source:MGI Symbol;Acc:MGI:2655107]
#INFO:	QUERY:	ENSMUSG00000075069	OLFR1264	olfactory receptor 1264 [Source:MGI Symbol;Acc:MGI:3031098]
#INFO:	QUERY:	ENSMUSG00000075610	TMEM92	transmembrane protein 92 [Source:MGI Symbol;Acc:MGI:3034723]
#INFO:	QUERY:	ENSMUSG00000037334	H2-M1	histocompatibility 2, M region locus 1 [Source:MGI Symbol;Acc:MGI:95913]
#INFO:	QUERY:	ENSMUSG00000085683	9130409J20RIK	RIKEN cDNA 9130409J20 gene [Source:MGI Symbol;Acc:MGI:1918826]
#INFO:	QUERY:	ENSMUSG00000097407	4933408J17RIK	RIKEN cDNA 4933408J17 gene [Source:MGI Symbol;Acc:MGI:1921704]
#INFO:	QUERY:	ENSMUSG00000082886	GM5386	predicted pseudogene 5386 [Source:MGI Symbol;Acc:MGI:3644449]
#INFO:	QUERY:	ENSMUSG00000097018	GM26872	predicted gene, 26872 [Source:MGI Symbol;Acc:MGI:5477366]
#INFO:	QUERY:	ENSMUSG00000101141	GM21139	predicted gene, 21139 [Source:MGI Symbol;Acc:MGI:5434494]
#INFO:	QUERY:	ENSMUSG00000090839	GM17094	predicted gene 17094 [Source:MGI Symbol;Acc:MGI:4937921]
#INFO:	QUERY:	ENSMUSG00000045027	PRSS22	protease, serine 22 [Source:MGI Symbol;Acc:MGI:1918085]
#INFO:	QUERY:	ENSMUSG00000081370	GM9105	predicted gene 9105 [Source:MGI Symbol;Acc:MGI:3648833]
#INFO:	QUERY:	ENSMUSG00000005355	CASP14	caspase 14 [Source:MGI Symbol;Acc:MGI:1335092]
#INFO:	QUERY:	ENSMUSG00000050765	GM5084	predicted gene 5084 [Source:MGI Symbol;Acc:MGI:3647835]
#INFO:	QUERY:	ENSMUSG00000104261	GM17781	predicted gene, 17781 [Source:MGI Symbol;Acc:MGI:5009945]
#INFO:	QUERY:	ENSMUSG00000104237	GM33533	predicted gene, 33533 [Source:MGI Symbol;Acc:MGI:5592692]
#INFO:	QUERY:	ENSMUSG00000075210	OLFR1012	olfactory receptor 1012 [Source:MGI Symbol;Acc:MGI:3030846]
#INFO:	QUERY:	ENSMUSG00000044058	MTHFR-PS1	5,10-methylenetetrahydrofolate reductase, pseudogene 1 [Source:MGI Symbol;Acc:MGI:2384077]
#INFO:	QUERY:	ENSMUSG00000100899	OLFR1167	olfactory receptor 1167 [Source:MGI Symbol;Acc:MGI:3031001]
#INFO:	QUERY:	ENSMUSG00000080762	GM11879	predicted gene 11879 [Source:MGI Symbol;Acc:MGI:3651783]
#INFO:	QUERY:	ENSMUSG00000091020	GM5828	predicted gene 5828 [Source:MGI Symbol;Acc:MGI:3644176]
#INFO:	QUERY:	ENSMUSG00000057801	OLFR135	olfactory receptor 135 [Source:MGI Symbol;Acc:MGI:2177518]
#INFO:	QUERY:	ENSMUSG00000023274	CD4	CD4 antigen [Source:MGI Symbol;Acc:MGI:88335]
#INFO:	QUERY:	ENSMUSG00000100430	1700095A13RIK	RIKEN cDNA 1700095A13 gene [Source:MGI Symbol;Acc:MGI:1924245]
#INFO:	QUERY:	ENSMUSG00000074289	VMN1R173	vomeronasal 1 receptor 173 [Source:MGI Symbol;Acc:MGI:3645760]
#INFO:	QUERY:	ENSMUSG00000106090	GM43704	predicted gene 43704 [Source:MGI Symbol;Acc:MGI:5663841]
#INFO:	QUERY:	ENSMUSG00000039814	XKR5	X-linked Kx blood group related 5 [Source:MGI Symbol;Acc:MGI:2442327]
#INFO:	QUERY:	ENSMUSG00000098026	GM27014	predicted gene, 27014 [Source:MGI Symbol;Acc:MGI:5504129]
#INFO:	QUERY:	ENSMUSG00000038214	BEND3	BEN domain containing 3 [Source:MGI Symbol;Acc:MGI:2677212]
#INFO:	QUERY:	ENSMUSG00000103015	GM37549	predicted gene, 37549 [Source:MGI Symbol;Acc:MGI:5610777]
#INFO:	QUERY:	ENSMUSG00000053391	OLFR211	olfactory receptor 211 [Source:MGI Symbol;Acc:MGI:3030045]
#INFO:	QUERY:	ENSMUSG00000021702	THBS4	thrombospondin 4 [Source:MGI Symbol;Acc:MGI:1101779]
#INFO:	QUERY:	ENSMUSG00000084836	GM16274	predicted gene 16274 [Source:MGI Symbol;Acc:MGI:3826552]
#INFO:	QUERY:	ENSMUSG00000087074	GM14249	predicted gene 14249 [Source:MGI Symbol;Acc:MGI:3651257]
#INFO:	QUERY:	ENSMUSG00000019768	ESR1	estrogen receptor 1 (alpha) [Source:MGI Symbol;Acc:MGI:1352467]
#INFO:	QUERY:	ENSMUSG00000051136	GHSR	growth hormone secretagogue receptor [Source:MGI Symbol;Acc:MGI:2441906]
#INFO:	QUERY:	ENSMUSG00000042759	APOBR	apolipoprotein B receptor [Source:MGI Symbol;Acc:MGI:2176230]
#INFO:	QUERY:	ENSMUSG00000047702	OLFR1388	olfactory receptor 1388 [Source:MGI Symbol;Acc:MGI:3031222]
#INFO:	QUERY:	ENSMUSG00000030142	CLEC4E	C-type lectin domain family 4, member e [Source:MGI Symbol;Acc:MGI:1861232]
#INFO:	QUERY:	ENSMUSG00000037143	CFAP61	cilia and flagella associated protein 61 [Source:MGI Symbol;Acc:MGI:1926024]
#INFO:	QUERY:	ENSMUSG00000091601	OLFR93	olfactory receptor 93 [Source:MGI Symbol;Acc:MGI:2177476]
#INFO:	QUERY:	ENSMUSG00000068947	OLFR366	olfactory receptor 366 [Source:MGI Symbol;Acc:MGI:3030200]
#INFO:	QUERY:	ENSMUSG00000000731	AIRE	autoimmune regulator (autoimmune polyendocrinopathy candidiasis ectodermal dystrophy) [Source:MGI Symbol;Acc:MGI:1338803]
#INFO:	QUERY:	ENSMUSG00000104223	GM18428	predicted gene, 18428 [Source:MGI Symbol;Acc:MGI:5010613]
#INFO:	QUERY:	ENSMUSG00000087675	GM11762	predicted gene 11762 [Source:MGI Symbol;Acc:MGI:3651277]
#INFO:	QUERY:	ENSMUSG00000053747	SOX14	SRY (sex determining region Y)-box 14 [Source:MGI Symbol;Acc:MGI:98362]
#INFO:	QUERY:	ENSMUSG00000071937	ADAM25	a disintegrin and metallopeptidase domain 25 (testase 2) [Source:MGI Symbol;Acc:MGI:1345157]
#INFO:	QUERY:	ENSMUSG00000085008	DBHOS	dopamine beta hydroxylase, opposite strand [Source:MGI Symbol;Acc:MGI:3652314]
#INFO:	QUERY:	ENSMUSG00000049128	IVL	involucrin [Source:MGI Symbol;Acc:MGI:96626]
#INFO:	QUERY:	ENSMUSG00000070034	SP110	Sp110 nuclear body protein [Source:MGI Symbol;Acc:MGI:1923364]
#INFO:	QUERY:	ENSMUSG00000100721	GM9271	predicted gene 9271 [Source:MGI Symbol;Acc:MGI:3646449]
#INFO:	QUERY:	ENSMUSG00000033368	TRIM69	tripartite motif-containing 69 [Source:MGI Symbol;Acc:MGI:1918178]
#INFO:	QUERY:	ENSMUSG00000103160	C130012C08RIK	RIKEN cDNA C130012C08 gene [Source:MGI Symbol;Acc:MGI:2145684]
#INFO:	QUERY:	ENSMUSG00000049691	NKX3-2	NK3 homeobox 2 [Source:MGI Symbol;Acc:MGI:108015]
#INFO:	QUERY:	ENSMUSG00000064294	AOX3	aldehyde oxidase 3 [Source:MGI Symbol;Acc:MGI:1918974]
#INFO:	QUERY:	ENSMUSG00000105134	GM42923	predicted gene 42923 [Source:MGI Symbol;Acc:MGI:5663060]
#INFO:	QUERY:	ENSMUSG00000108448	GM21269	predicted gene, 21269 [Source:MGI Symbol;Acc:MGI:5434624]
#INFO:	QUERY:	ENSMUSG00000059397	OLFR54	olfactory receptor 54 [Source:MGI Symbol;Acc:MGI:1333750]
#INFO:	QUERY:	ENSMUSG00000097452	GM2824	predicted gene 2824 [Source:MGI Symbol;Acc:MGI:3780995]
#INFO:	QUERY:	ENSMUSG00000030043	TACR1	tachykinin receptor 1 [Source:MGI Symbol;Acc:MGI:98475]
#INFO:	QUERY:	ENSMUSG00000026301	IQCA	IQ motif containing with AAA domain [Source:MGI Symbol;Acc:MGI:1922168]
#INFO:	QUERY:	ENSMUSG00000106802	GM42885	predicted gene 42885 [Source:MGI Symbol;Acc:MGI:5663022]
#INFO:	QUERY:	ENSMUSG00000087581	GM11571	predicted gene 11571 [Source:MGI Symbol;Acc:MGI:3650087]
#INFO:	QUERY:	ENSMUSG00000090168	D630014O11RIK	RIKEN cDNA D630014O11 gene [Source:MGI Symbol;Acc:MGI:2442874]
#INFO:	QUERY:	ENSMUSG00000089084	GM24005	predicted gene, 24005 [Source:MGI Symbol;Acc:MGI:5453782]
#INFO:	QUERY:	ENSMUSG00000100990	GM7891	predicted gene 7891 [Source:MGI Symbol;Acc:MGI:3645230]
#INFO:	QUERY:	ENSMUSG00000055872	GM9985	predicted gene 9985 [Source:MGI Symbol;Acc:MGI:3708539]
#INFO:	QUERY:	ENSMUSG00000056687	GM11696	predicted gene 11696 [Source:MGI Symbol;Acc:MGI:3701776]
#INFO:	QUERY:	ENSMUSG00000026288	INPP5D	inositol polyphosphate-5-phosphatase D [Source:MGI Symbol;Acc:MGI:107357]
#INFO:	QUERY:	ENSMUSG00000094119	OLFR612	olfactory receptor 612 [Source:MGI Symbol;Acc:MGI:3030446]
#INFO:	QUERY:	ENSMUSG00000082829	GM15780	predicted gene 15780 [Source:MGI Symbol;Acc:MGI:3783222]
#INFO:	QUERY:	ENSMUSG00000081623	GM8809	predicted gene 8809 [Source:MGI Symbol;Acc:MGI:3645410]
#INFO:	QUERY:	ENSMUSG00000005553	ATP4A	ATPase, H+/K+ exchanging, gastric, alpha polypeptide [Source:MGI Symbol;Acc:MGI:88113]
#INFO:	QUERY:	ENSMUSG00000086261	GM3765	predicted gene 3765 [Source:MGI Symbol;Acc:MGI:3781939]
#INFO:	QUERY:	ENSMUSG00000024401	TNF	tumor necrosis factor [Source:MGI Symbol;Acc:MGI:104798]
#INFO:	QUERY:	ENSMUSG00000061561	OLFR373	olfactory receptor 373 [Source:MGI Symbol;Acc:MGI:3030207]
#INFO:	QUERY:	ENSMUSG00000082864	GM13358	predicted gene 13358 [Source:MGI Symbol;Acc:MGI:3649552]
#INFO:	QUERY:	ENSMUSG00000078253	KRTAP16-1	keratin associated protein 16-1 [Source:MGI Symbol;Acc:MGI:3650326]
#INFO:	QUERY:	ENSMUSG00000109568	GM45074	predicted gene 45074 [Source:MGI Symbol;Acc:MGI:5753650]
#INFO:	QUERY:	ENSMUSG00000054135	A430110L20RIK	RIKEN cDNA A430110L20 gene [Source:MGI Symbol;Acc:MGI:3036249]
#INFO:	QUERY:	ENSMUSG00000028197	COL24A1	collagen, type XXIV, alpha 1 [Source:MGI Symbol;Acc:MGI:1918605]
#INFO:	QUERY:	ENSMUSG00000071713	CSF2RB	colony stimulating factor 2 receptor, beta, low-affinity (granulocyte-macrophage) [Source:MGI Symbol;Acc:MGI:1339759]
#INFO:	QUERY:	ENSMUSG00000086278	OLFR75-PS1	olfactory receptor 75, pseudogene 1 [Source:MGI Symbol;Acc:MGI:2153204]
#INFO:	QUERY:	ENSMUSG00000109451	GM18129	predicted gene, 18129 [Source:MGI Symbol;Acc:MGI:5010314]
#INFO:	QUERY:	ENSMUSG00000044519	ZFP488	zinc finger protein 488 [Source:MGI Symbol;Acc:MGI:2686052]
#INFO:	QUERY:	ENSMUSG00000023243	KCNK5	potassium channel, subfamily K, member 5 [Source:MGI Symbol;Acc:MGI:1336175]
#INFO:	QUERY:	ENSMUSG00000099779	GM8228	predicted gene 8228 [Source:MGI Symbol;Acc:MGI:3646986]
#INFO:	QUERY:	ENSMUSG00000079227	CCR5	chemokine (C-C motif) receptor 5 [Source:MGI Symbol;Acc:MGI:107182]
#INFO:	QUERY:	ENSMUSG00000058794	NFE2	nuclear factor, erythroid derived 2 [Source:MGI Symbol;Acc:MGI:97308]
#INFO:	QUERY:	ENSMUSG00000056290	MS4A4B	membrane-spanning 4-domains, subfamily A, member 4B [Source:MGI Symbol;Acc:MGI:1913083]
#INFO:	QUERY:	ENSMUSG00000083954	GM12179	predicted gene 12179 [Source:MGI Symbol;Acc:MGI:3651494]
#INFO:	QUERY:	ENSMUSG00000073457	SMOK2B	sperm motility kinase 2B [Source:MGI Symbol;Acc:MGI:3037705]
#INFO:	QUERY:	ENSMUSG00000018168	IKZF3	IKAROS family zinc finger 3 [Source:MGI Symbol;Acc:MGI:1342542]
#INFO:	QUERY:	ENSMUSG00000024846	CST6	cystatin E/M [Source:MGI Symbol;Acc:MGI:1920970]
#INFO:	QUERY:	ENSMUSG00000070799	PSG26	pregnancy-specific glycoprotein 26 [Source:MGI Symbol;Acc:MGI:1891358]
#INFO:	QUERY:	ENSMUSG00000021611	TERT	telomerase reverse transcriptase [Source:MGI Symbol;Acc:MGI:1202709]
#INFO:	QUERY:	ENSMUSG00000068744	PSRC1	proline/serine-rich coiled-coil 1 [Source:MGI Symbol;Acc:MGI:1913099]
#INFO:	QUERY:	ENSMUSG00000107609	GM20177	predicted gene, 20177 [Source:MGI Symbol;Acc:MGI:5012362]
#INFO:	QUERY:	ENSMUSG00000041248	KCNJ1	potassium inwardly-rectifying channel, subfamily J, member 1 [Source:MGI Symbol;Acc:MGI:1927248]
#INFO:	QUERY:	ENSMUSG00000026398	NR5A2	nuclear receptor subfamily 5, group A, member 2 [Source:MGI Symbol;Acc:MGI:1346834]
#INFO:	QUERY:	ENSMUSG00000024552	SLC14A2	solute carrier family 14 (urea transporter), member 2 [Source:MGI Symbol;Acc:MGI:1351653]
#INFO:	QUERY:	ENSMUSG00000069581	TSPEAR	thrombospondin type laminin G domain and EAR repeats [Source:MGI Symbol;Acc:MGI:2671932]
#INFO:	QUERY:	ENSMUSG00000079424	GM3259	predicted gene 3259 [Source:MGI Symbol;Acc:MGI:3781437]
#INFO:	QUERY:	ENSMUSG00000024186	RGS11	regulator of G-protein signaling 11 [Source:MGI Symbol;Acc:MGI:1354739]
#INFO:	QUERY:	ENSMUSG00000106391	GM42690	predicted gene 42690 [Source:MGI Symbol;Acc:MGI:5662827]
#INFO:	QUERY:	ENSMUSG00000097283	GM26686	predicted gene, 26686 [Source:MGI Symbol;Acc:MGI:5477180]
#INFO:	QUERY:	ENSMUSG00000068227	IL2RB	interleukin 2 receptor, beta chain [Source:MGI Symbol;Acc:MGI:96550]
#INFO:	QUERY:	ENSMUSG00000047040	PRR15L	proline rich 15-like [Source:MGI Symbol;Acc:MGI:2387599]
#INFO:	QUERY:	ENSMUSG00000097653	GM16387	predicted gene 16387 [Source:MGI Symbol;Acc:MGI:3646111]
#INFO:	QUERY:	ENSMUSG00000087606	GM16121	predicted gene 16121 [Source:MGI Symbol;Acc:MGI:3802131]
#INFO:	QUERY:	ENSMUSG00000106707	GM43748	predicted gene 43748 [Source:MGI Symbol;Acc:MGI:5663885]
#INFO:	QUERY:	ENSMUSG00000067780	PI15	peptidase inhibitor 15 [Source:MGI Symbol;Acc:MGI:1934659]
#INFO:	QUERY:	ENSMUSG00000055125	M5C1000I18RIK	RIKEN cDNA M5C1000I18 gene [Source:MGI Symbol;Acc:MGI:3642038]
#INFO:	QUERY:	ENSMUSG00000071113	MBOAT4	membrane bound O-acyltransferase domain containing 4 [Source:MGI Symbol;Acc:MGI:2685017]
#INFO:	QUERY:	ENSMUSG00000093589	GM18367	predicted gene, 18367 [Source:MGI Symbol;Acc:MGI:5010552]
#INFO:	QUERY:	ENSMUSG00000103411	GM18300	predicted gene, 18300 [Source:MGI Symbol;Acc:MGI:5010485]
#INFO:	QUERY:	ENSMUSG00000108795	GM45121	predicted gene 45121 [Source:MGI Symbol;Acc:MGI:5753697]
#INFO:	QUERY:	ENSMUSG00000027345	4921508D12RIK	RIKEN cDNA 4921508D12 gene [Source:MGI Symbol;Acc:MGI:1918095]
#INFO:	QUERY:	ENSMUSG00000037995	IGSF9	immunoglobulin superfamily, member 9 [Source:MGI Symbol;Acc:MGI:2135283]
#INFO:	QUERY:	ENSMUSG00000096225	LHX8	LIM homeobox protein 8 [Source:MGI Symbol;Acc:MGI:1096343]
#INFO:	QUERY:	ENSMUSG00000107254	GM43769	predicted gene 43769 [Source:MGI Symbol;Acc:MGI:5663906]
#INFO:	QUERY:	ENSMUSG00000089697	GM15947	predicted gene 15947 [Source:MGI Symbol;Acc:MGI:3801748]
#INFO:	QUERY:	ENSMUSG00000058628	OLFR875	olfactory receptor 875 [Source:MGI Symbol;Acc:MGI:3030709]
#INFO:	QUERY:	ENSMUSG00000082030	GM13081	predicted gene 13081 [Source:MGI Symbol;Acc:MGI:3650234]
#INFO:	QUERY:	ENSMUSG00000083620	GM15529	predicted gene 15529 [Source:MGI Symbol;Acc:MGI:3782977]
#INFO:	QUERY:	ENSMUSG00000031294	D630029K05RIK	RIKEN cDNA D630029K05 gene [Source:MGI Symbol;Acc:MGI:2143561]
#INFO:	QUERY:	ENSMUSG00000000247	LHX2	LIM homeobox protein 2 [Source:MGI Symbol;Acc:MGI:96785]
#INFO:	QUERY:	ENSMUSG00000097710	2310026I22RIK	RIKEN cDNA 2310026I22 gene [Source:MGI Symbol;Acc:MGI:1916843]
#INFO:	QUERY:	ENSMUSG00000097435	GM26783	predicted gene, 26783 [Source:MGI Symbol;Acc:MGI:5477277]
#INFO:	QUERY:	ENSMUSG00000097767	MIAT	myocardial infarction associated transcript (non-protein coding) [Source:MGI Symbol;Acc:MGI:2444886]
#INFO:	QUERY:	ENSMUSG00000074758	GM5535	predicted gene 5535 [Source:MGI Symbol;Acc:MGI:3645019]
#INFO:	QUERY:	ENSMUSG00000089701	GM15978	predicted gene 15978 [Source:MGI Symbol;Acc:MGI:3802110]
#INFO:	QUERY:	ENSMUSG00000069456	RDH16	retinol dehydrogenase 16 [Source:MGI Symbol;Acc:MGI:1201375]
#INFO:	QUERY:	ENSMUSG00000037335	HAND1	heart and neural crest derivatives expressed transcript 1 [Source:MGI Symbol;Acc:MGI:103577]
#INFO:	QUERY:	ENSMUSG00000087095	EMX2OS	Emx2 opposite strand/antisense transcript (non-protein coding) [Source:MGI Symbol;Acc:MGI:3052329]
#INFO:	QUERY:	ENSMUSG00000103907	GM37498	predicted gene, 37498 [Source:MGI Symbol;Acc:MGI:5610726]
#INFO:	QUERY:	ENSMUSG00000109473	B930025P03RIK	RIKEN cDNA B930025P03 gene [Source:MGI Symbol;Acc:MGI:2443166]
#INFO:	QUERY:	ENSMUSG00000097050	GM9918	predicted gene 9918 [Source:MGI Symbol;Acc:MGI:3646315]
#INFO:	QUERY:	ENSMUSG00000084998	GM16279	predicted gene 16279 [Source:MGI Symbol;Acc:MGI:3826576]
#INFO:	QUERY:	ENSMUSG00000037206	ISLR	immunoglobulin superfamily containing leucine-rich repeat [Source:MGI Symbol;Acc:MGI:1349645]
#INFO:	QUERY:	ENSMUSG00000028167	BDH2	3-hydroxybutyrate dehydrogenase, type 2 [Source:MGI Symbol;Acc:MGI:1917022]
#INFO:	QUERY:	ENSMUSG00000087317	4930466I24RIK	RIKEN cDNA 4930466I24 gene [Source:MGI Symbol;Acc:MGI:1923066]
#INFO:	QUERY:	ENSMUSG00000033882	RBM46	RNA binding motif protein 46 [Source:MGI Symbol;Acc:MGI:3645057]
#INFO:	QUERY:	ENSMUSG00000102482	GM37924	predicted gene, 37924 [Source:MGI Symbol;Acc:MGI:5611152]
#INFO:	QUERY:	ENSMUSG00000048096	LMOD1	leiomodin 1 (smooth muscle) [Source:MGI Symbol;Acc:MGI:2135671]
#INFO:	QUERY:	ENSMUSG00000032578	CISH	cytokine inducible SH2-containing protein [Source:MGI Symbol;Acc:MGI:103159]
#INFO:	QUERY:	ENSMUSG00000090254	GM1965	predicted gene 1965 [Source:MGI Symbol;Acc:MGI:3584270]
#INFO:	QUERY:	ENSMUSG00000103089	GM38118	predicted gene, 38118 [Source:MGI Symbol;Acc:MGI:5611346]
#INFO:	QUERY:	ENSMUSG00000086421	GM14091	predicted gene 14091 [Source:MGI Symbol;Acc:MGI:3650488]
#INFO:	QUERY:	ENSMUSG00000044061	OLFR225	olfactory receptor 225 [Source:MGI Symbol;Acc:MGI:3030059]
#INFO:	QUERY:	ENSMUSG00000040197	CD209E	CD209e antigen [Source:MGI Symbol;Acc:MGI:2157948]
#INFO:	QUERY:	ENSMUSG00000095774	OLFR970	olfactory receptor 970 [Source:MGI Symbol;Acc:MGI:3030804]
#INFO:	QUERY:	ENSMUSG00000064281	RPL19-PS1	ribosomal protein L19, pseudogene 1 [Source:MGI Symbol;Acc:MGI:3642668]
#INFO:	QUERY:	ENSMUSG00000100658	F730311O21RIK	RIKEN cDNA F730311O21 gene [Source:MGI Symbol;Acc:MGI:3643355]
#INFO:	QUERY:	ENSMUSG00000094841	GM10610	predicted gene 10610 [Source:MGI Symbol;Acc:MGI:3642045]
#INFO:	QUERY:	ENSMUSG00000100813	GM28874	predicted gene 28874 [Source:MGI Symbol;Acc:MGI:5579580]
#INFO:	QUERY:	ENSMUSG00000101026	D730001G18RIK	RIKEN cDNA D730001G18 gene [Source:MGI Symbol;Acc:MGI:1925975]
#INFO:	QUERY:	ENSMUSG00000034486	GBX2	gastrulation brain homeobox 2 [Source:MGI Symbol;Acc:MGI:95668]
#INFO:	QUERY:	ENSMUSG00000013668	4933402N03RIK	RIKEN cDNA 4933402N03 gene [Source:MGI Symbol;Acc:MGI:1914681]
#INFO:	QUERY:	ENSMUSG00000094302	N/A	N/A
#INFO:	QUERY:	ENSMUSG00000080775	GM6368	predicted gene 6368 [Source:MGI Symbol;Acc:MGI:3644537]
#INFO:	QUERY:	ENSMUSG00000085057	GM13415	predicted gene 13415 [Source:MGI Symbol;Acc:MGI:3651241]
#INFO:	QUERY:	ENSMUSG00000083281	GM13332	predicted gene 13332 [Source:MGI Symbol;Acc:MGI:3649261]
#INFO:	QUERY:	ENSMUSG00000018986	SLFN3	schlafen 3 [Source:MGI Symbol;Acc:MGI:1329005]
#INFO:	QUERY:	ENSMUSG00000020950	FOXG1	forkhead box G1 [Source:MGI Symbol;Acc:MGI:1347464]
#INFO:	QUERY:	ENSMUSG00000046623	GJB4	gap junction protein, beta 4 [Source:MGI Symbol;Acc:MGI:95722]
#INFO:	QUERY:	ENSMUSG00000024105	THEMIS3	thymocyte selection associated family member 3 [Source:MGI Symbol;Acc:MGI:1921806]
#INFO:	QUERY:	ENSMUSG00000092518	FAM71E2	family with sequence similarity 71, member E2 [Source:MGI Symbol;Acc:MGI:3045311]
#INFO:	QUERY:	ENSMUSG00000014030	PAX5	paired box 5 [Source:MGI Symbol;Acc:MGI:97489]
#INFO:	QUERY:	ENSMUSG00000102240	GM37717	predicted gene, 37717 [Source:MGI Symbol;Acc:MGI:5610945]
#INFO:	QUERY:	ENSMUSG00000099757	BE692007	expressed sequence BE692007 [Source:MGI Symbol;Acc:MGI:3035348]
#INFO:	QUERY:	ENSMUSG00000084890	A830036E02RIK	RIKEN cDNA A830036E02 gene [Source:MGI Symbol;Acc:MGI:3686876]
#INFO:	QUERY:	ENSMUSG00000100444	C530043A13RIK	RIKEN cDNA C530043A13 gene [Source:MGI Symbol;Acc:MGI:2441914]
#INFO:	QUERY:	ENSMUSG00000103571	GM37114	predicted gene, 37114 [Source:MGI Symbol;Acc:MGI:5610342]
#INFO:	QUERY:	ENSMUSG00000070857	OLFR1113	olfactory receptor 1113 [Source:MGI Symbol;Acc:MGI:3030947]
#INFO:	QUERY:	ENSMUSG00000034533	SCN10A	sodium channel, voltage-gated, type X, alpha [Source:MGI Symbol;Acc:MGI:108029]
#INFO:	QUERY:	ENSMUSG00000032093	CD3E	CD3 antigen, epsilon polypeptide [Source:MGI Symbol;Acc:MGI:88332]
#INFO:	QUERY:	ENSMUSG00000042243	BC051665	cDNA sequence BC051665 [Source:MGI Symbol;Acc:MGI:2682300]
#INFO:	QUERY:	ENSMUSG00000106482	IGHV8-16	immunoglobulin heavy variable V8-16 [Source:MGI Symbol;Acc:MGI:5434409]
#INFO:	QUERY:	ENSMUSG00000072259	GM5592	predicted gene 5592 [Source:MGI Symbol;Acc:MGI:3648691]
#INFO:	QUERY:	ENSMUSG00000021751	ACOX2	acyl-Coenzyme A oxidase 2, branched chain [Source:MGI Symbol;Acc:MGI:1934852]
#INFO:	QUERY:	ENSMUSG00000066122	OLFR45	olfactory receptor 45 [Source:MGI Symbol;Acc:MGI:1333826]
#INFO:	QUERY:	ENSMUSG00000109202	GM21037	predicted gene, 21037 [Source:MGI Symbol;Acc:MGI:5434392]
#INFO:	QUERY:	ENSMUSG00000103580	GM10417	predicted gene 10417 [Source:MGI Symbol;Acc:MGI:3642677]
#INFO:	QUERY:	ENSMUSG00000032528	VIPR1	vasoactive intestinal peptide receptor 1 [Source:MGI Symbol;Acc:MGI:109272]
#INFO:	QUERY:	ENSMUSG00000056529	PTAFR	platelet-activating factor receptor [Source:MGI Symbol;Acc:MGI:106066]
#INFO:	QUERY:	ENSMUSG00000082370	GM12313	predicted gene 12313 [Source:MGI Symbol;Acc:MGI:3649993]
#INFO:	QUERY:	ENSMUSG00000028838	EXTL1	exostoses (multiple)-like 1 [Source:MGI Symbol;Acc:MGI:1888742]
#INFO:	QUERY:	ENSMUSG00000086179	GM14317	predicted gene 14317 [Source:MGI Symbol;Acc:MGI:3651690]
#INFO:	QUERY:	ENSMUSG00000096520	GM3376	predicted gene 3376 [Source:MGI Symbol;Acc:MGI:3781554]
#INFO:	QUERY:	ENSMUSG00000089075	GM23820	predicted gene, 23820 [Source:MGI Symbol;Acc:MGI:5453597]
#INFO:	QUERY:	ENSMUSG00000056822	OLFR166	olfactory receptor 166 [Source:MGI Symbol;Acc:MGI:3030000]
#INFO:	QUERY:	ENSMUSG00000090069	E430024P14RIK	RIKEN cDNA E430024P14 gene [Source:MGI Symbol;Acc:MGI:2445079]
#INFO:	QUERY:	ENSMUSG00000023992	TREM2	triggering receptor expressed on myeloid cells 2 [Source:MGI Symbol;Acc:MGI:1913150]
#INFO:	QUERY:	ENSMUSG00000033427	UPB1	ureidopropionase, beta [Source:MGI Symbol;Acc:MGI:2143535]
#INFO:	QUERY:	ENSMUSG00000097776	GM26795	predicted gene, 26795 [Source:MGI Symbol;Acc:MGI:5477289]
#INFO:	QUERY:	ENSMUSG00000048905	4930539E08RIK	RIKEN cDNA 4930539E08 gene [Source:MGI Symbol;Acc:MGI:1925441]
#INFO:	QUERY:	ENSMUSG00000103610	GM37947	predicted gene, 37947 [Source:MGI Symbol;Acc:MGI:5611175]
#INFO:	QUERY:	ENSMUSG00000006345	GGT1	gamma-glutamyltransferase 1 [Source:MGI Symbol;Acc:MGI:95706]
#INFO:	QUERY:	ENSMUSG00000019935	SLC17A8	solute carrier family 17 (sodium-dependent inorganic phosphate cotransporter), member 8 [Source:MGI Symbol;Acc:MGI:3039629]
#INFO:	QUERY:	ENSMUSG00000109532	GM42397	predicted gene, 42397 [Source:MGI Symbol;Acc:MGI:5625282]
#INFO:	QUERY:	ENSMUSG00000091285	GM17430	predicted gene, 17430 [Source:MGI Symbol;Acc:MGI:4937064]
#INFO:	QUERY:	ENSMUSG00000104122	GM37482	predicted gene, 37482 [Source:MGI Symbol;Acc:MGI:5610710]
#INFO:	QUERY:	ENSMUSG00000001497	PAX9	paired box 9 [Source:MGI Symbol;Acc:MGI:97493]
#INFO:	QUERY:	ENSMUSG00000096035	GM1045	predicted gene 1045 [Source:MGI Symbol;Acc:MGI:2685891]
#INFO:	QUERY:	ENSMUSG00000086654	GM13165	predicted gene 13165 [Source:MGI Symbol;Acc:MGI:3650210]
#INFO:	QUERY:	ENSMUSG00000025652	TMEM89	transmembrane protein 89 [Source:MGI Symbol;Acc:MGI:1916634]
#INFO:	QUERY:	ENSMUSG00000026417	PIGR	polymeric immunoglobulin receptor [Source:MGI Symbol;Acc:MGI:103080]
#INFO:	QUERY:	ENSMUSG00000087474	GM12100	predicted gene 12100 [Source:MGI Symbol;Acc:MGI:3651586]
#INFO:	QUERY:	ENSMUSG00000070407	HS3ST3B1	heparan sulfate (glucosamine) 3-O-sulfotransferase 3B1 [Source:MGI Symbol;Acc:MGI:1333853]
#INFO:	QUERY:	ENSMUSG00000047969	OLFR1093	olfactory receptor 1093 [Source:MGI Symbol;Acc:MGI:3030927]
#INFO:	QUERY:	ENSMUSG00000102380	GM38140	predicted gene, 38140 [Source:MGI Symbol;Acc:MGI:5611368]
#INFO:	QUERY:	ENSMUSG00000105749	GM9251	predicted gene 9251 [Source:MGI Symbol;Acc:MGI:3645129]
#INFO:	QUERY:	ENSMUSG00000029102	HGFAC	hepatocyte growth factor activator [Source:MGI Symbol;Acc:MGI:1859281]
#INFO:	QUERY:	ENSMUSG00000042489	CLSPN	claspin [Source:MGI Symbol;Acc:MGI:2445153]
#INFO:	QUERY:	ENSMUSG00000072594	GM16439	predicted pseudogene 16439 [Source:MGI Symbol;Acc:MGI:3647611]
#INFO:	QUERY:	ENSMUSG00000082064	RPL5-PS2	ribisomal protein L5, pseudogene 2 [Source:MGI Symbol;Acc:MGI:3649355]
#INFO:	QUERY:	ENSMUSG00000057216	GM10807	predicted gene 10807 [Source:MGI Symbol;Acc:MGI:3798168]
#INFO:	QUERY:	ENSMUSG00000086904	GM13404	predicted gene 13404 [Source:MGI Symbol;Acc:MGI:3649379]
#INFO:	QUERY:	ENSMUSG00000108145	GM38811	predicted gene, 38811 [Source:MGI Symbol;Acc:MGI:5621696]
#INFO:	QUERY:	ENSMUSG00000101511	GM5681	predicted gene 5681 [Source:MGI Symbol;Acc:MGI:3647870]
#INFO:	QUERY:	ENSMUSG00000030324	RHO	rhodopsin [Source:MGI Symbol;Acc:MGI:97914]
#INFO:	QUERY:	ENSMUSG00000068105	TNFRSF13C	tumor necrosis factor receptor superfamily, member 13c [Source:MGI Symbol;Acc:MGI:1919299]
#INFO:	QUERY:	ENSMUSG00000087131	GM16152	predicted gene 16152 [Source:MGI Symbol;Acc:MGI:3802058]
#INFO:	QUERY:	ENSMUSG00000085599	GM13449	predicted gene 13449 [Source:MGI Symbol;Acc:MGI:3651453]
#INFO:	QUERY:	ENSMUSG00000102895	5830415G21RIK	RIKEN cDNA 5830415G21 gene [Source:MGI Symbol;Acc:MGI:1923259]
#INFO:	QUERY:	ENSMUSG00000109486	N/A	N/A
#INFO:	QUERY:	ENSMUSG00000067642	ADGRF3	adhesion G protein-coupled receptor F3 [Source:MGI Symbol;Acc:MGI:2685887]
#INFO:	QUERY:	ENSMUSG00000079604	GM13219	predicted gene 13219 [Source:MGI Symbol;Acc:MGI:3651678]
#INFO:	QUERY:	ENSMUSG00000094964	GM15101	predicted gene 15101 [Source:MGI Symbol;Acc:MGI:3782931]
#INFO:	QUERY:	ENSMUSG00000053720	VMN2R43	vomeronasal 2, receptor 43 [Source:MGI Symbol;Acc:MGI:3037819]
#INFO:	QUERY:	ENSMUSG00000085562	2610028E06RIK	RIKEN cDNA 2610028E06 gene [Source:MGI Symbol;Acc:MGI:1919645]
#INFO:	QUERY:	ENSMUSG00000020067	MYPN	myopalladin [Source:MGI Symbol;Acc:MGI:1916052]
#INFO:	QUERY:	ENSMUSG00000055775	MYH8	myosin, heavy polypeptide 8, skeletal muscle, perinatal [Source:MGI Symbol;Acc:MGI:1339712]
#INFO:	QUERY:	ENSMUSG00000108470	GM4598	predicted gene 4598 [Source:MGI Symbol;Acc:MGI:3782781]
#INFO:	QUERY:	ENSMUSG00000079445	B3GNT7	UDP-GlcNAc:betaGal beta-1,3-N-acetylglucosaminyltransferase 7 [Source:MGI Symbol;Acc:MGI:2384394]
#INFO:	QUERY:	ENSMUSG00000046589	LRRC8E	leucine rich repeat containing 8 family, member E [Source:MGI Symbol;Acc:MGI:1919517]
#INFO:	QUERY:	ENSMUSG00000104768	GM38412	predicted gene, 38412 [Source:MGI Symbol;Acc:MGI:5621297]
#INFO:	QUERY:	ENSMUSG00000106157	4930555A03RIK	RIKEN cDNA 4930555A03 gene [Source:MGI Symbol;Acc:MGI:1922587]
#INFO:	QUERY:	ENSMUSG00000019429	FFAR3	free fatty acid receptor 3 [Source:MGI Symbol;Acc:MGI:2685324]
#INFO:	QUERY:	ENSMUSG00000106126	GM43781	predicted gene 43781 [Source:MGI Symbol;Acc:MGI:5663918]
#INFO:	QUERY:	ENSMUSG00000089958	GM16165	predicted gene 16165 [Source:MGI Symbol;Acc:MGI:3802009]
#INFO:	QUERY:	ENSMUSG00000100782	GM28231	predicted gene 28231 [Source:MGI Symbol;Acc:MGI:5578937]
#INFO:	QUERY:	ENSMUSG00000107240	GM43231	predicted gene 43231 [Source:MGI Symbol;Acc:MGI:5663368]
#INFO:	QUERY:	ENSMUSG00000090907	C030017D09RIK	RIKEN cDNA C030017D09 gene [Source:MGI Symbol;Acc:MGI:1924634]
#INFO:	QUERY:	ENSMUSG00000081827	GM15103	predicted gene 15103 [Source:MGI Symbol;Acc:MGI:3705809]
#INFO:	QUERY:	ENSMUSG00000085957	SYNA	syncytin a [Source:MGI Symbol;Acc:MGI:2684898]
#INFO:	QUERY:	ENSMUSG00000099115	GM17190	predicted gene 17190 [Source:MGI Symbol;Acc:MGI:4938017]
#INFO:	QUERY:	ENSMUSG00000103815	GM19194	predicted gene, 19194 [Source:MGI Symbol;Acc:MGI:5011379]
#INFO:	QUERY:	ENSMUSG00000054488	GM9946	predicted gene 9946 [Source:MGI Symbol;Acc:MGI:3643134]
#INFO:	QUERY:	ENSMUSG00000105155	GM42910	predicted gene 42910 [Source:MGI Symbol;Acc:MGI:5663047]
#INFO:	QUERY:	ENSMUSG00000101196	GM6866	predicted gene 6866 [Source:MGI Symbol;Acc:MGI:3646160]
#INFO:	QUERY:	ENSMUSG00000082068	GM2673	predicted gene 2673 [Source:MGI Symbol;Acc:MGI:3780842]
#INFO:	QUERY:	ENSMUSG00000072923	GM10439	predicted gene 10439 [Source:MGI Symbol;Acc:MGI:3710525]
#INFO:	QUERY:	ENSMUSG00000097137	GM26627	predicted gene, 26627 [Source:MGI Symbol;Acc:MGI:5477121]
#INFO:	QUERY:	ENSMUSG00000086569	RAB11FIP4OS2	RAB11 family interacting protein 4 (class II), opposite strand 2 [Source:MGI Symbol;Acc:MGI:1925439]
#INFO:	QUERY:	ENSMUSG00000087341	0610040F04RIK	RIKEN cDNA 0610040F04 gene [Source:MGI Symbol;Acc:MGI:1922644]
#INFO:	QUERY:	ENSMUSG00000025519	TKTL2	transketolase-like 2 [Source:MGI Symbol;Acc:MGI:1921669]
#INFO:	QUERY:	ENSMUSG00000091902	GM6918	predicted gene 6918 [Source:MGI Symbol;Acc:MGI:3643700]
#INFO:	QUERY:	ENSMUSG00000093919	GM20760	predicted gene, 20760 [Source:MGI Symbol;Acc:MGI:5434116]
#INFO:	QUERY:	ENSMUSG00000109558	GM45100	predicted gene 45100 [Source:MGI Symbol;Acc:MGI:5753676]
#INFO:	QUERY:	ENSMUSG00000019027	DNAH1	dynein, axonemal, heavy chain 1 [Source:MGI Symbol;Acc:MGI:107721]
#INFO:	QUERY:	ENSMUSG00000095242	GM20834	predicted gene, 20834 [Source:MGI Symbol;Acc:MGI:5434190]
#INFO:	QUERY:	ENSMUSG00000022805	MAATS1	MYCBP-associated, testis expressed 1 [Source:MGI Symbol;Acc:MGI:2443598]
#INFO:	QUERY:	ENSMUSG00000030607	ACAN	aggrecan [Source:MGI Symbol;Acc:MGI:99602]
#INFO:	QUERY:	ENSMUSG00000032191	BCL2L10	Bcl2-like 10 [Source:MGI Symbol;Acc:MGI:1330841]
#INFO:	QUERY:	ENSMUSG00000027831	VEPH1	ventricular zone expressed PH domain-containing 1 [Source:MGI Symbol;Acc:MGI:1920039]
#INFO:	QUERY:	ENSMUSG00000109111	6530437J22RIK	RIKEN cDNA 6530437J22 gene [Source:MGI Symbol;Acc:MGI:1925320]
#INFO:	QUERY:	ENSMUSG00000092618	BTNL6	butyrophilin-like 6 [Source:MGI Symbol;Acc:MGI:1932038]
#INFO:	QUERY:	ENSMUSG00000085307	GM11525	predicted gene 11525 [Source:MGI Symbol;Acc:MGI:3651809]
#INFO:	QUERY:	ENSMUSG00000055312	THEM7	thioesterase superfamily member 7 [Source:MGI Symbol;Acc:MGI:1921338]
#INFO:	QUERY:	ENSMUSG00000068011	MKRN2OS	makorin, ring finger protein 2, opposite strand [Source:MGI Symbol;Acc:MGI:1917541]
#INFO:	QUERY:	ENSMUSG00000036553	SH3TC1	SH3 domain and tetratricopeptide repeats 1 [Source:MGI Symbol;Acc:MGI:2678949]
#INFO:	QUERY:	ENSMUSG00000108660	GM21284	predicted gene, 21284 [Source:MGI Symbol;Acc:MGI:5434639]
#INFO:	QUERY:	ENSMUSG00000087468	GM7023	predicted gene 7023 [Source:MGI Symbol;Acc:MGI:3779647]
#INFO:	QUERY:	ENSMUSG00000097356	GM26774	predicted gene, 26774 [Source:MGI Symbol;Acc:MGI:5477268]
#INFO:	QUERY:	ENSMUSG00000051498	TLR6	toll-like receptor 6 [Source:MGI Symbol;Acc:MGI:1341296]
#INFO:	QUERY:	ENSMUSG00000053863	MEPE	matrix extracellular phosphoglycoprotein with ASARM motif (bone) [Source:MGI Symbol;Acc:MGI:2137384]
#INFO:	QUERY:	ENSMUSG00000090894	OLFR110	olfactory receptor 110 [Source:MGI Symbol;Acc:MGI:2177493]
#INFO:	QUERY:	ENSMUSG00000032937	FSHR	follicle stimulating hormone receptor [Source:MGI Symbol;Acc:MGI:95583]
#INFO:	QUERY:	ENSMUSG00000104985	GM42917	predicted gene 42917 [Source:MGI Symbol;Acc:MGI:5663054]
#INFO:	QUERY:	ENSMUSG00000096372	GM8138	predicted gene 8138 [Source:MGI Symbol;Acc:MGI:3647466]
#INFO:	QUERY:	ENSMUSG00000022915	1700093J21RIK	RIKEN cDNA 1700093J21 gene [Source:MGI Symbol;Acc:MGI:1921546]
#INFO:	QUERY:	ENSMUSG00000061086	MYL4	myosin, light polypeptide 4 [Source:MGI Symbol;Acc:MGI:97267]
#INFO:	QUERY:	ENSMUSG00000045609	GM5455	predicted pseudogene 5455 [Source:MGI Symbol;Acc:MGI:3646920]
#INFO:	QUERY:	ENSMUSG00000025804	CCR1	chemokine (C-C motif) receptor 1 [Source:MGI Symbol;Acc:MGI:104618]
#INFO:	QUERY:	ENSMUSG00000020624	4933434M16RIK	RIKEN cDNA 4933434M16 gene [Source:MGI Symbol;Acc:MGI:1918453]
#INFO:	QUERY:	ENSMUSG00000047884	KLK9	kallikrein related-peptidase 9 [Source:MGI Symbol;Acc:MGI:1921082]
#INFO:	QUERY:	ENSMUSG00000022900	ILDR1	immunoglobulin-like domain containing receptor 1 [Source:MGI Symbol;Acc:MGI:2146574]
#INFO:	QUERY:	ENSMUSG00000094542	VMN1R149	vomeronasal 1 receptor 149 [Source:MGI Symbol;Acc:MGI:3782370]
#INFO:	QUERY:	ENSMUSG00000094545	VMN1R101	vomeronasal 1 receptor 101 [Source:MGI Symbol;Acc:MGI:3782311]
#INFO:	QUERY:	ENSMUSG00000024459	H2-M5	histocompatibility 2, M region locus 5 [Source:MGI Symbol;Acc:MGI:95917]
#INFO:	QUERY:	ENSMUSG00000033730	EGR3	early growth response 3 [Source:MGI Symbol;Acc:MGI:1306780]
#INFO:	QUERY:	ENSMUSG00000102323	GM37790	predicted gene, 37790 [Source:MGI Symbol;Acc:MGI:5611018]
#INFO:	QUERY:	ENSMUSG00000103035	GM37122	predicted gene, 37122 [Source:MGI Symbol;Acc:MGI:5610350]
#INFO:	QUERY:	ENSMUSG00000091416	GM6327	predicted gene 6327 [Source:MGI Symbol;Acc:MGI:3646646]
#INFO:	QUERY:	ENSMUSG00000054545	UGT1A6A	UDP glucuronosyltransferase 1 family, polypeptide A6A [Source:MGI Symbol;Acc:MGI:2137698]
#INFO:	QUERY:	ENSMUSG00000102236	GM37887	predicted gene, 37887 [Source:MGI Symbol;Acc:MGI:5611115]
#INFO:	QUERY:	ENSMUSG00000056031	9330154J02RIK	RIKEN cDNA 9330154J02 gene [Source:MGI Symbol;Acc:MGI:3045244]
#INFO:	QUERY:	ENSMUSG00000087180	GM11924	predicted gene 11924 [Source:MGI Symbol;Acc:MGI:3649863]
#INFO:	QUERY:	ENSMUSG00000101825	GM21806	predicted gene, 21806 [Source:MGI Symbol;Acc:MGI:5433970]
#INFO:	QUERY:	ENSMUSG00000107773	GM43971	predicted gene, 43971 [Source:MGI Symbol;Acc:MGI:5690363]
#INFO:	QUERY:	ENSMUSG00000055865	FAM19A3	family with sequence similarity 19, member A3 [Source:MGI Symbol;Acc:MGI:3046463]
#INFO:	QUERY:	ENSMUSG00000029380	CXCL1	chemokine (C-X-C motif) ligand 1 [Source:MGI Symbol;Acc:MGI:108068]
#INFO:	QUERY:	ENSMUSG00000054889	DSP	desmoplakin [Source:MGI Symbol;Acc:MGI:109611]
#INFO:	QUERY:	ENSMUSG00000057499	GM6177	predicted gene 6177 [Source:MGI Symbol;Acc:MGI:3643753]
#INFO:	QUERY:	ENSMUSG00000071414	GM6736	predicted gene 6736 [Source:MGI Symbol;Acc:MGI:3643048]
#INFO:	QUERY:	ENSMUSG00000082507	GM9378	predicted gene 9378 [Source:MGI Symbol;Acc:MGI:3643021]
#INFO:	QUERY:	ENSMUSG00000101828	D130051D11RIK	RIKEN cDNA D130051D11 gene [Source:MGI Symbol;Acc:MGI:2442642]
#INFO:	QUERY:	ENSMUSG00000051490	FOXD4	forkhead box D4 [Source:MGI Symbol;Acc:MGI:1347467]
#INFO:	QUERY:	ENSMUSG00000099406	GM29408	predicted gene 29408 [Source:MGI Symbol;Acc:MGI:5580114]
#INFO:	QUERY:	ENSMUSG00000019866	CRYBG1	crystallin beta-gamma domain containing 1 [Source:MGI Symbol;Acc:MGI:109544]
#INFO:	QUERY:	ENSMUSG00000085836	GM13074	predicted gene 13074 [Source:MGI Symbol;Acc:MGI:3651959]
#INFO:	QUERY:	ENSMUSG00000029754	DLX6	distal-less homeobox 6 [Source:MGI Symbol;Acc:MGI:101927]
#INFO:	QUERY:	ENSMUSG00000068196	COL8A1	collagen, type VIII, alpha 1 [Source:MGI Symbol;Acc:MGI:88463]
#INFO:	QUERY:	ENSMUSG00000052951	C130021I20RIK	Riken cDNA C130021I20 gene [Source:MGI Symbol;Acc:MGI:3639863]
#INFO:	QUERY:	ENSMUSG00000040046	TPH1	tryptophan hydroxylase 1 [Source:MGI Symbol;Acc:MGI:98796]
#INFO:	QUERY:	ENSMUSG00000097638	CARLR	cardiac and apoptosis-related long non-coding RNA [Source:MGI Symbol;Acc:MGI:1914024]
#INFO:	QUERY:	ENSMUSG00000094090	GM8494	predicted gene 8494 [Source:MGI Symbol;Acc:MGI:3645114]
#INFO:	QUERY:	ENSMUSG00000086943	4732414G09RIK	RIKEN cDNA 4732414G09 gene [Source:MGI Symbol;Acc:MGI:3045381]
#INFO:	QUERY:	ENSMUSG00000090827	GM8297	predicted gene 8297 [Source:MGI Symbol;Acc:MGI:3643799]
#INFO:	QUERY:	ENSMUSG00000107316	GM42964	predicted gene 42964 [Source:MGI Symbol;Acc:MGI:5663101]
#INFO:	QUERY:	ENSMUSG00000070425	XNTRPC	Xndc1-transient receptor potential cation channel, subfamily C, member 2 readthrough [Source:MGI Symbol;Acc:MGI:5546370]
#INFO:	QUERY:	ENSMUSG00000094063	OLFR638	olfactory receptor 638 [Source:MGI Symbol;Acc:MGI:3030472]
#INFO:	QUERY:	ENSMUSG00000036687	TMEM184A	transmembrane protein 184a [Source:MGI Symbol;Acc:MGI:2385897]
#INFO:	QUERY:	ENSMUSG00000062438	ADAM1B	a disintegrin and metallopeptidase domain 1b [Source:MGI Symbol;Acc:MGI:2429506]
#INFO:	QUERY:	ENSMUSG00000089719	GM15758	predicted gene 15758 [Source:MGI Symbol;Acc:MGI:3783201]
#INFO:	QUERY:	ENSMUSG00000046056	SBSN	suprabasin [Source:MGI Symbol;Acc:MGI:2446326]
#INFO:	QUERY:	ENSMUSG00000107699	GM43970	predicted gene, 43970 [Source:MGI Symbol;Acc:MGI:5690362]
#INFO:	QUERY:	ENSMUSG00000034115	SCN11A	sodium channel, voltage-gated, type XI, alpha [Source:MGI Symbol;Acc:MGI:1345149]
#INFO:	QUERY:	ENSMUSG00000097124	A530020G20RIK	RIKEN cDNA A530020G20 gene [Source:MGI Symbol;Acc:MGI:2442825]
#INFO:	QUERY:	ENSMUSG00000105926	GM43386	predicted gene 43386 [Source:MGI Symbol;Acc:MGI:5663523]
#INFO:	QUERY:	ENSMUSG00000104527	GM37332	predicted gene, 37332 [Source:MGI Symbol;Acc:MGI:5610560]
#INFO:	QUERY:	ENSMUSG00000079164	TLR5	toll-like receptor 5 [Source:MGI Symbol;Acc:MGI:1858171]
#INFO:	QUERY:	ENSMUSG00000100323	N/A	N/A
#INFO:	QUERY:	ENSMUSG00000031382	ASB11	ankyrin repeat and SOCS box-containing 11 [Source:MGI Symbol;Acc:MGI:1916104]
#INFO:	QUERY:	ENSMUSG00000074665	BPIFB4	BPI fold containing family B, member 4 [Source:MGI Symbol;Acc:MGI:2685852]
#INFO:	QUERY:	ENSMUSG00000082629	GM5639	predicted pseudogene 5639 [Source:MGI Symbol;Acc:MGI:3645127]
#INFO:	QUERY:	ENSMUSG00000101976	N/A	N/A
#INFO:	QUERY:	ENSMUSG00000102853	GM7270	predicted gene 7270 [Source:MGI Symbol;Acc:MGI:3644317]
#INFO:	QUERY:	ENSMUSG00000107846	GM43963	predicted gene, 43963 [Source:MGI Symbol;Acc:MGI:5690355]
#INFO:	QUERY:	ENSMUSG00000103961	GM36388	predicted gene, 36388 [Source:MGI Symbol;Acc:MGI:5595547]
#INFO:	QUERY:	ENSMUSG00000089751	N/A	N/A
#INFO:	QUERY:	ENSMUSG00000106957	GM43085	predicted gene 43085 [Source:MGI Symbol;Acc:MGI:5663222]
#INFO:	QUERY:	ENSMUSG00000026459	MYOG	myogenin [Source:MGI Symbol;Acc:MGI:97276]
#INFO:	QUERY:	ENSMUSG00000106820	D5ERTD605E	DNA segment, Chr 5, ERATO Doi 605, expressed [Source:MGI Symbol;Acc:MGI:1277165]
#INFO:	QUERY:	ENSMUSG00000099596	ZBED4-PS3	zinc finger, BED type containing 4, pseudogene 3 [Source:MGI Symbol;Acc:MGI:5010916]
#INFO:	QUERY:	ENSMUSG00000103242	GM34767	predicted gene, 34767 [Source:MGI Symbol;Acc:MGI:5593926]
#INFO:	QUERY:	ENSMUSG00000087374	GM15457	predicted gene 15457 [Source:MGI Symbol;Acc:MGI:3705190]
#INFO:	QUERY:	ENSMUSG00000090700	CYP4F40	cytochrome P450, family 4, subfamily f, polypeptide 40 [Source:MGI Symbol;Acc:MGI:3645508]
#INFO:	QUERY:	ENSMUSG00000105258	GM40038	predicted gene, 40038 [Source:MGI Symbol;Acc:MGI:5622923]
#INFO:	QUERY:	ENSMUSG00000015484	FAM163A	family with sequence similarity 163, member A [Source:MGI Symbol;Acc:MGI:3618859]
#INFO:	QUERY:	ENSMUSG00000059027	9630013D21RIK	RIKEN cDNA 9630013D21 gene [Source:MGI Symbol;Acc:MGI:2442649]
#INFO:	QUERY:	ENSMUSG00000056061	GATA5OS	GATA binding protein 5, opposite strand [Source:MGI Symbol;Acc:MGI:3650386]
#INFO:	QUERY:	ENSMUSG00000051682	TREML4	triggering receptor expressed on myeloid cells-like 4 [Source:MGI Symbol;Acc:MGI:1923239]
#INFO:	QUERY:	ENSMUSG00000084897	GM14226	predicted gene 14226 [Source:MGI Symbol;Acc:MGI:3649244]
#INFO:	QUERY:	ENSMUSG00000040434	LARGE2	LARGE xylosyl- and glucuronyltransferase 2 [Source:MGI Symbol;Acc:MGI:2443769]
#INFO:	QUERY:	ENSMUSG00000089652	GM16025	predicted gene 16025 [Source:MGI Symbol;Acc:MGI:3802144]
#INFO:	QUERY:	ENSMUSG00000020185	E2F7	E2F transcription factor 7 [Source:MGI Symbol;Acc:MGI:1289147]
#INFO:	QUERY:	ENSMUSG00000070111	GM10286	predicted gene 10286 [Source:MGI Symbol;Acc:MGI:3642117]
#INFO:	QUERY:	ENSMUSG00000036526	CARD11	caspase recruitment domain family, member 11 [Source:MGI Symbol;Acc:MGI:1916978]
#INFO:	QUERY:	ENSMUSG00000073803	4930544L04RIK	RIKEN cDNA 4930544L04 gene [Source:MGI Symbol;Acc:MGI:1926057]
#INFO:	QUERY:	ENSMUSG00000101941	GM28979	predicted gene 28979 [Source:MGI Symbol;Acc:MGI:5579685]
#INFO:	QUERY:	ENSMUSG00000090113	NHLRC4	NHL repeat containing 4 [Source:MGI Symbol;Acc:MGI:3687200]
#INFO:	QUERY:	ENSMUSG00000103923	GM37896	predicted gene, 37896 [Source:MGI Symbol;Acc:MGI:5611124]
#INFO:	QUERY:	ENSMUSG00000026686	LMX1A	LIM homeobox transcription factor 1 alpha [Source:MGI Symbol;Acc:MGI:1888519]
#INFO:	QUERY:	ENSMUSG00000056328	MYH1	myosin, heavy polypeptide 1, skeletal muscle, adult [Source:MGI Symbol;Acc:MGI:1339711]
#INFO:	QUERY:	ENSMUSG00000078668	GM11595	predicted gene 11595 [Source:MGI Symbol;Acc:MGI:3652308]
#INFO:	QUERY:	ENSMUSG00000106916	GM3089	predicted gene 3089 [Source:MGI Symbol;Acc:MGI:3781265]
#INFO:	QUERY:	ENSMUSG00000107213	GM3302	predicted gene 3302 [Source:MGI Symbol;Acc:MGI:3781480]
#INFO:	QUERY:	ENSMUSG00000104159	GM38099	predicted gene, 38099 [Source:MGI Symbol;Acc:MGI:5611327]
#INFO:	QUERY:	ENSMUSG00000046971	PLA2G4F	phospholipase A2, group IVF [Source:MGI Symbol;Acc:MGI:2685493]
#INFO:	QUERY:	ENSMUSG00000092509	GM20394	predicted gene 20394 [Source:MGI Symbol;Acc:MGI:5141859]
#INFO:	QUERY:	ENSMUSG00000097085	GM26634	predicted gene, 26634 [Source:MGI Symbol;Acc:MGI:5477128]
#INFO:	QUERY:	ENSMUSG00000093976	GM8674	predicted gene 8674 [Source:MGI Symbol;Acc:MGI:3645762]
#INFO:	QUERY:	ENSMUSG00000029847	SLC23A4	solute carrier family 23 member 4 [Source:MGI Symbol;Acc:MGI:1917272]
#INFO:	QUERY:	ENSMUSG00000106109	GM42704	predicted gene 42704 [Source:MGI Symbol;Acc:MGI:5662841]
#INFO:	QUERY:	ENSMUSG00000108266	GM5305	predicted gene 5305 [Source:MGI Symbol;Acc:MGI:3644734]
#INFO:	QUERY:	ENSMUSG00000091151	VMN1R224	vomeronasal 1 receptor 224 [Source:MGI Symbol;Acc:MGI:3645524]
#INFO:	QUERY:	ENSMUSG00000058260	SERPINA9	serine (or cysteine) peptidase inhibitor, clade A (alpha-1 antiproteinase, antitrypsin), member 9 [Source:MGI Symbol;Acc:MGI:1919157]
#INFO:	QUERY:	ENSMUSG00000097134	1110002J07RIK	RIKEN cDNA 1110002J07 gene [Source:MGI Symbol;Acc:MGI:1915738]
#INFO:	QUERY:	ENSMUSG00000097268	GM26805	predicted gene, 26805 [Source:MGI Symbol;Acc:MGI:5477299]
#INFO:	QUERY:	ENSMUSG00000101073	VMN1R200	vomeronasal 1 receptor 200 [Source:MGI Symbol;Acc:MGI:2159660]
#INFO:	QUERY:	ENSMUSG00000020545	LRRC72	leucine rich repeat containing 72 [Source:MGI Symbol;Acc:MGI:1920830]
#INFO:	QUERY:	ENSMUSG00000035638	MUC20	mucin 20 [Source:MGI Symbol;Acc:MGI:2385039]
#INFO:	QUERY:	ENSMUSG00000044017	ADGRD1	adhesion G protein-coupled receptor D1 [Source:MGI Symbol;Acc:MGI:3041203]
#INFO:	QUERY:	ENSMUSG00000104843	GM5308	predicted gene 5308 [Source:MGI Symbol;Acc:MGI:3646418]
#INFO:	QUERY:	ENSMUSG00000109249	GM44610	predicted gene 44610 [Source:MGI Symbol;Acc:MGI:5753186]
#INFO:	QUERY:	ENSMUSG00000083038	GM13233	predicted gene 13233 [Source:MGI Symbol;Acc:MGI:3649253]
#INFO:	QUERY:	ENSMUSG00000107740	GM18765	predicted gene, 18765 [Source:MGI Symbol;Acc:MGI:5010950]
#INFO:	QUERY:	ENSMUSG00000049382	KRT8	keratin 8 [Source:MGI Symbol;Acc:MGI:96705]
#INFO:	QUERY:	ENSMUSG00000058295	PRP2	proline rich protein 2 [Source:MGI Symbol;Acc:MGI:1932491]
#INFO:	QUERY:	ENSMUSG00000108561	GM45219	predicted gene 45219 [Source:MGI Symbol;Acc:MGI:5753795]
#INFO:	QUERY:	ENSMUSG00000106184	GM43463	predicted gene 43463 [Source:MGI Symbol;Acc:MGI:5663600]
#INFO:	QUERY:	ENSMUSG00000074155	KLK5	kallikrein related-peptidase 5 [Source:MGI Symbol;Acc:MGI:1915918]
#INFO:	QUERY:	ENSMUSG00000105923	A830019L24RIK	RIKEN cDNA A830019L24 gene [Source:MGI Symbol;Acc:MGI:2443282]
#INFO:	QUERY:	ENSMUSG00000054827	CYP2C50	cytochrome P450, family 2, subfamily c, polypeptide 50 [Source:MGI Symbol;Acc:MGI:2147497]
#INFO:	QUERY:	ENSMUSG00000083692	GM9575	predicted gene 9575 [Source:MGI Symbol;Acc:MGI:3779984]
#INFO:	QUERY:	ENSMUSG00000053093	MYH7	myosin, heavy polypeptide 7, cardiac muscle, beta [Source:MGI Symbol;Acc:MGI:2155600]
#INFO:	QUERY:	ENSMUSG00000033825	TPSB2	tryptase beta 2 [Source:MGI Symbol;Acc:MGI:96942]
#INFO:	QUERY:	ENSMUSG00000037279	OVOL2	ovo like zinc finger 2 [Source:MGI Symbol;Acc:MGI:1338039]
#INFO:	QUERY:	ENSMUSG00000081632	GM11443	predicted gene 11443 [Source:MGI Symbol;Acc:MGI:3651160]
#INFO:	QUERY:	ENSMUSG00000100800	GM21301	predicted gene, 21301 [Source:MGI Symbol;Acc:MGI:5434656]
#INFO:	QUERY:	ENSMUSG00000101996	GM19206	predicted gene, 19206 [Source:MGI Symbol;Acc:MGI:5011391]
#INFO:	QUERY:	ENSMUSG00000094867	GM21900	predicted gene, 21900 [Source:MGI Symbol;Acc:MGI:5434064]
#INFO:	QUERY:	ENSMUSG00000090138	GM3687	predicted gene 3687 [Source:MGI Symbol;Acc:MGI:3781863]
#INFO:	QUERY:	ENSMUSG00000055235	WDR86	WD repeat domain 86 [Source:MGI Symbol;Acc:MGI:1915466]
#INFO:	QUERY:	ENSMUSG00000098106	GM5350	predicted gene 5350 [Source:MGI Symbol;Acc:MGI:3647041]
#INFO:	QUERY:	ENSMUSG00000100925	GM28898	predicted gene 28898 [Source:MGI Symbol;Acc:MGI:5579604]
#INFO:	QUERY:	ENSMUSG00000104167	A030012G06RIK	RIKEN cDNA A030012G06 gene [Source:MGI Symbol;Acc:MGI:3028038]
#INFO:	QUERY:	ENSMUSG00000103422	GM37536	predicted gene, 37536 [Source:MGI Symbol;Acc:MGI:5610764]
#INFO:	QUERY:	ENSMUSG00000108900	C430049E01RIK	RIKEN cDNA C430049E01 gene [Source:MGI Symbol;Acc:MGI:3588239]
#INFO:	QUERY:	ENSMUSG00000066820	VMN2R28	vomeronasal 2, receptor 28 [Source:MGI Symbol;Acc:MGI:3645468]
#INFO:	QUERY:	ENSMUSG00000090892	VMN2R41	vomeronasal 2, receptor 41 [Source:MGI Symbol;Acc:MGI:3757876]
#INFO:	QUERY:	ENSMUSG00000035032	NEK11	NIMA (never in mitosis gene a)-related expressed kinase 11 [Source:MGI Symbol;Acc:MGI:2442276]
#INFO:	QUERY:	ENSMUSG00000057719	SH3RF2	SH3 domain containing ring finger 2 [Source:MGI Symbol;Acc:MGI:2444628]
#INFO:	QUERY:	ENSMUSG00000085710	GM12676	predicted gene 12676 [Source:MGI Symbol;Acc:MGI:3651064]
#INFO:	QUERY:	ENSMUSG00000059504	OLFR314	olfactory receptor 314 [Source:MGI Symbol;Acc:MGI:3030148]
#INFO:	QUERY:	ENSMUSG00000097097	5033426O07RIK	RIKEN cDNA 5033426O07 gene [Source:MGI Symbol;Acc:MGI:1923251]
#INFO:	QUERY:	ENSMUSG00000048562	SP8	trans-acting transcription factor 8 [Source:MGI Symbol;Acc:MGI:2443471]
#INFO:	QUERY:	ENSMUSG00000060962	DMKN	dermokine [Source:MGI Symbol;Acc:MGI:1920962]
#INFO:	QUERY:	ENSMUSG00000078586	GM11735	predicted gene 11735 [Source:MGI Symbol;Acc:MGI:3713525]
#INFO:	QUERY:	ENSMUSG00000085333	1700030A11RIK	RIKEN cDNA 1700030A11 gene [Source:MGI Symbol;Acc:MGI:1921429]
#INFO:	QUERY:	ENSMUSG00000108745	GM17908	predicted gene, 17908 [Source:MGI Symbol;Acc:MGI:5010093]
#INFO:	QUERY:	ENSMUSG00000019848	POPDC3	popeye domain containing 3 [Source:MGI Symbol;Acc:MGI:1930153]
#INFO:	QUERY:	ENSMUSG00000028747	HTR6	5-hydroxytryptamine (serotonin) receptor 6 [Source:MGI Symbol;Acc:MGI:1196627]
#INFO:	QUERY:	ENSMUSG00000086425	F730016J06RIK	RIKEN cDNA F730016J06 gene [Source:MGI Symbol;Acc:MGI:2443559]
#INFO:	QUERY:	ENSMUSG00000045330	4933402E13RIK	RIKEN cDNA 4933402E13 gene [Source:MGI Symbol;Acc:MGI:1921687]
#INFO:	QUERY:	ENSMUSG00000045761	TOGARAM2	TOG array regulator of axonemal microtubules 2 [Source:MGI Symbol;Acc:MGI:2443498]
#INFO:	QUERY:	ENSMUSG00000032080	APOA4	apolipoprotein A-IV [Source:MGI Symbol;Acc:MGI:88051]
#INFO:	QUERY:	ENSMUSG00000108311	GM44737	predicted gene 44737 [Source:MGI Symbol;Acc:MGI:5753313]
#INFO:	QUERY:	ENSMUSG00000070533	WFDC8	WAP four-disulfide core domain 8 [Source:MGI Symbol;Acc:MGI:2685552]
#INFO:	QUERY:	ENSMUSG00000075101	OLFR1222	olfactory receptor 1222 [Source:MGI Symbol;Acc:MGI:3031056]
#INFO:	QUERY:	ENSMUSG00000051611	OLFR112	olfactory receptor 112 [Source:MGI Symbol;Acc:MGI:2177495]
#INFO:	QUERY:	ENSMUSG00000058914	C1QTNF3	C1q and tumor necrosis factor related protein 3 [Source:MGI Symbol;Acc:MGI:1932136]
#INFO:	QUERY:	ENSMUSG00000050288	FZD2	frizzled class receptor 2 [Source:MGI Symbol;Acc:MGI:1888513]
#INFO:	QUERY:	ENSMUSG00000037705	TECTA	tectorin alpha [Source:MGI Symbol;Acc:MGI:109575]
#INFO:	QUERY:	ENSMUSG00000073907	OLFR689	olfactory receptor 689 [Source:MGI Symbol;Acc:MGI:3030523]
#INFO:	QUERY:	ENSMUSG00000042106	FAM212A	family with sequence similarity 212, member A [Source:MGI Symbol;Acc:MGI:1915426]
#INFO:	QUERY:	ENSMUSG00000074849	SPATA31D1C	spermatogenesis associated 31 subfamily D, member 1C [Source:MGI Symbol;Acc:MGI:3588241]
#INFO:	QUERY:	ENSMUSG00000010592	DAZL	deleted in azoospermia-like [Source:MGI Symbol;Acc:MGI:1342328]
#INFO:	QUERY:	ENSMUSG00000099372	GM28509	predicted gene 28509 [Source:MGI Symbol;Acc:MGI:5579215]
#INFO:	QUERY:	ENSMUSG00000105701	GM42587	predicted gene 42587 [Source:MGI Symbol;Acc:MGI:5662724]
#INFO:	QUERY:	ENSMUSG00000030862	CPXM2	carboxypeptidase X 2 (M14 family) [Source:MGI Symbol;Acc:MGI:1926006]
#INFO:	QUERY:	ENSMUSG00000087050	DHRS13OS	dehydrogenase/reductase (SDR family) member 13, opposite strand [Source:MGI Symbol;Acc:MGI:1924478]
#INFO:	QUERY:	ENSMUSG00000072244	TRIM6	tripartite motif-containing 6 [Source:MGI Symbol;Acc:MGI:2137352]
#INFO:	QUERY:	ENSMUSG00000105687	GM6157	predicted gene 6157 [Source:MGI Symbol;Acc:MGI:3779561]
#INFO:	QUERY:	ENSMUSG00000001517	FOXM1	forkhead box M1 [Source:MGI Symbol;Acc:MGI:1347487]
#INFO:	QUERY:	ENSMUSG00000096966	GM18336	predicted gene, 18336 [Source:MGI Symbol;Acc:MGI:5010521]
#INFO:	QUERY:	ENSMUSG00000038092	HSD3B5	hydroxy-delta-5-steroid dehydrogenase, 3 beta- and steroid delta-isomerase 5 [Source:MGI Symbol;Acc:MGI:104645]
#INFO:	QUERY:	ENSMUSG00000039710	SLC7A12	solute carrier family 7 (cationic amino acid transporter, y+ system), member 12 [Source:MGI Symbol;Acc:MGI:2156159]
#INFO:	QUERY:	ENSMUSG00000058976	USP17LC	ubiquitin specific peptidase 17-like C [Source:MGI Symbol;Acc:MGI:107698]
#INFO:	QUERY:	ENSMUSG00000105416	GM42553	predicted gene 42553 [Source:MGI Symbol;Acc:MGI:5662690]
#INFO:	QUERY:	ENSMUSG00000051056	GJA10	gap junction protein, alpha 10 [Source:MGI Symbol;Acc:MGI:1339969]
#INFO:	QUERY:	ENSMUSG00000094555	OBOX4-PS6	oocyte specific homeobox 4, pseudogene 6 [Source:MGI Symbol;Acc:MGI:5313157]
#INFO:	QUERY:	ENSMUSG00000105150	GM43615	predicted gene 43615 [Source:MGI Symbol;Acc:MGI:5663752]
#INFO:	QUERY:	ENSMUSG00000029075	TNFRSF4	tumor necrosis factor receptor superfamily, member 4 [Source:MGI Symbol;Acc:MGI:104512]
#INFO:	QUERY:	ENSMUSG00000022015	TNFSF11	tumor necrosis factor (ligand) superfamily, member 11 [Source:MGI Symbol;Acc:MGI:1100089]
#INFO:	QUERY:	ENSMUSG00000081939	GM15399	predicted gene 15399 [Source:MGI Symbol;Acc:MGI:3705526]
#INFO:	QUERY:	ENSMUSG00000060205	OLFR57	olfactory receptor 57 [Source:MGI Symbol;Acc:MGI:1333808]
#INFO:	QUERY:	ENSMUSG00000047497	ADAMTS12	a disintegrin-like and metallopeptidase (reprolysin type) with thrombospondin type 1 motif, 12 [Source:MGI Symbol;Acc:MGI:2146046]
#INFO:	QUERY:	ENSMUSG00000027947	IL6RA	interleukin 6 receptor, alpha [Source:MGI Symbol;Acc:MGI:105304]
#INFO:	QUERY:	ENSMUSG00000024837	DMRT1	doublesex and mab-3 related transcription factor 1 [Source:MGI Symbol;Acc:MGI:1354733]
#INFO:	QUERY:	ENSMUSG00000101167	H2AFY3	H2A histone family, member Y3 [Source:MGI Symbol;Acc:MGI:1914802]
#INFO:	QUERY:	ENSMUSG00000087615	PNPLA1OS	patatin-like phospholipase domain containing 1, opposite strand [Source:MGI Symbol;Acc:MGI:3801758]
#INFO:	QUERY:	ENSMUSG00000109410	OLFR1430-PS1	olfactory receptor 1430, pseudogene 1 [Source:MGI Symbol;Acc:MGI:3031264]
#INFO:	QUERY:	ENSMUSG00000075097	OLFR1226	olfactory receptor 1226 [Source:MGI Symbol;Acc:MGI:3031060]
#INFO:	QUERY:	ENSMUSG00000091825	GM5778	predicted gene 5778 [Source:MGI Symbol;Acc:MGI:3646275]
#INFO:	QUERY:	ENSMUSG00000080065	GM11864	predicted gene 11864 [Source:MGI Symbol;Acc:MGI:3650454]
#INFO:	QUERY:	ENSMUSG00000022034	ESCO2	establishment of sister chromatid cohesion N-acetyltransferase 2 [Source:MGI Symbol;Acc:MGI:1919238]
#INFO:	QUERY:	ENSMUSG00000037813	D630003M21RIK	RIKEN cDNA D630003M21 gene [Source:MGI Symbol;Acc:MGI:3606579]
#INFO:	QUERY:	ENSMUSG00000068245	PHF11D	PHD finger protein 11D [Source:MGI Symbol;Acc:MGI:1277133]
#INFO:	QUERY:	ENSMUSG00000051219	3100002H09RIK	RIKEN cDNA 3100002H09 gene [Source:MGI Symbol;Acc:MGI:1917499]
#INFO:	QUERY:	ENSMUSG00000046957	SPZ1	spermatogenic leucine zipper 1 [Source:MGI Symbol;Acc:MGI:1930801]
#INFO:	QUERY:	ENSMUSG00000092583	VMN2R-PS53	vomeronasal 2, receptor, pseudogene 53 [Source:MGI Symbol;Acc:MGI:3757948]
#INFO:	QUERY:	ENSMUSG00000104708	GM42503	predicted gene 42503 [Source:MGI Symbol;Acc:MGI:5662640]
#INFO:	QUERY:	ENSMUSG00000091091	KCNMB3	potassium large conductance calcium-activated channel, subfamily M, beta member 3 [Source:MGI Symbol;Acc:MGI:3612244]
#INFO:	QUERY:	ENSMUSG00000099492	GM5525	predicted gene 5525 [Source:MGI Symbol;Acc:MGI:3646042]
#INFO:	QUERY:	ENSMUSG00000097361	4930550C17RIK	RIKEN cDNA 4930550C17 gene [Source:MGI Symbol;Acc:MGI:1922495]
#INFO:	QUERY:	ENSMUSG00000102971	A730062M13RIK	RIKEN cDNA A730062M13 gene [Source:MGI Symbol;Acc:MGI:3029302]
#INFO:	QUERY:	ENSMUSG00000026415	FCAMR	Fc receptor, IgA, IgM, high affinity [Source:MGI Symbol;Acc:MGI:1927803]
#INFO:	QUERY:	ENSMUSG00000093472	4930438E09RIK	RIKEN cDNA 4930438E09 gene [Source:MGI Symbol;Acc:MGI:1921227]
#INFO:	QUERY:	ENSMUSG00000092227	GM7651	predicted gene 7651 [Source:MGI Symbol;Acc:MGI:3643732]
#INFO:	QUERY:	ENSMUSG00000103682	N/A	N/A
#INFO:	QUERY:	ENSMUSG00000094295	OLFR819	olfactory receptor 819 [Source:MGI Symbol;Acc:MGI:3030653]
#INFO:	QUERY:	ENSMUSG00000047686	ZCCHC5	zinc finger, CCHC domain containing 5 [Source:MGI Symbol;Acc:MGI:2685221]
#INFO:	QUERY:	ENSMUSG00000027318	ADAM33	a disintegrin and metallopeptidase domain 33 [Source:MGI Symbol;Acc:MGI:1341813]
#INFO:	QUERY:	ENSMUSG00000080764	GM14606	predicted gene 14606 [Source:MGI Symbol;Acc:MGI:3705612]
#INFO:	QUERY:	ENSMUSG00000015721	NLRP5	NLR family, pyrin domain containing 5 [Source:MGI Symbol;Acc:MGI:1345193]
#INFO:	QUERY:	ENSMUSG00000069390	OLFR707	olfactory receptor 707 [Source:MGI Symbol;Acc:MGI:3030541]
#INFO:	QUERY:	ENSMUSG00000071749	4933412E24RIK	RIKEN cDNA 4933412E24 gene [Source:MGI Symbol;Acc:MGI:1918338]
#INFO:	QUERY:	ENSMUSG00000109421	GM44998	predicted gene 44998 [Source:MGI Symbol;Acc:MGI:5753574]
#INFO:	QUERY:	ENSMUSG00000073413	LY6G6D	lymphocyte antigen 6 complex, locus G6D [Source:MGI Symbol;Acc:MGI:2148931]
#INFO:	QUERY:	ENSMUSG00000094635	GM7104	predicted gene 7104 [Source:MGI Symbol;Acc:MGI:3779672]
#INFO:	QUERY:	ENSMUSG00000101211	GM28818	predicted gene 28818 [Source:MGI Symbol;Acc:MGI:5579524]
#INFO:	QUERY:	ENSMUSG00000106994	GM10829	predicted gene 10829 [Source:MGI Symbol;Acc:MGI:3641721]
#INFO:	QUERY:	ENSMUSG00000053852	ADGRG4	adhesion G protein-coupled receptor G4 [Source:MGI Symbol;Acc:MGI:2685213]
#INFO:	QUERY:	ENSMUSG00000066850	VMN1R65	vomeronasal 1 receptor 65 [Source:MGI Symbol;Acc:MGI:3033475]
#INFO:	QUERY:	ENSMUSG00000021457	SYK	spleen tyrosine kinase [Source:MGI Symbol;Acc:MGI:99515]
#INFO:	QUERY:	ENSMUSG00000031651	TRIML1	tripartite motif family-like 1 [Source:MGI Symbol;Acc:MGI:2687279]
#INFO:	QUERY:	ENSMUSG00000038451	SPSB2	splA/ryanodine receptor domain and SOCS box containing 2 [Source:MGI Symbol;Acc:MGI:1315199]
#INFO:	QUERY:	ENSMUSG00000073794	I0C0044D17RIK	RIKEN cDNA I0C0044D17 gene [Source:MGI Symbol;Acc:MGI:3588230]
#INFO:	QUERY:	ENSMUSG00000059852	KCNG2	potassium voltage-gated channel, subfamily G, member 2 [Source:MGI Symbol;Acc:MGI:3694646]
#INFO:	QUERY:	ENSMUSG00000022586	LY6I	lymphocyte antigen 6 complex, locus I [Source:MGI Symbol;Acc:MGI:1888480]
#INFO:	QUERY:	ENSMUSG00000107755	MAGEB16-PS2	melanoma antigen family B, 16, pseudogene 2 [Source:MGI Symbol;Acc:MGI:3701602]
#INFO:	QUERY:	ENSMUSG00000081101	GM12024	predicted gene 12024 [Source:MGI Symbol;Acc:MGI:3650980]
#INFO:	QUERY:	ENSMUSG00000104964	4930597L12RIK	RIKEN cDNA 4930597L12 gene [Source:MGI Symbol;Acc:MGI:1922635]
#INFO:	QUERY:	ENSMUSG00000066268	OLFR586	olfactory receptor 586 [Source:MGI Symbol;Acc:MGI:3030420]
#INFO:	QUERY:	ENSMUSG00000065968	IFITM7	interferon induced transmembrane protein 7 [Source:MGI Symbol;Acc:MGI:1921732]
#INFO:	QUERY:	ENSMUSG00000102227	GM37302	predicted gene, 37302 [Source:MGI Symbol;Acc:MGI:5610530]
#INFO:	QUERY:	ENSMUSG00000029255	GNRHR	gonadotropin releasing hormone receptor [Source:MGI Symbol;Acc:MGI:95790]
#INFO:	QUERY:	ENSMUSG00000095075	OLFR782	olfactory receptor 782 [Source:MGI Symbol;Acc:MGI:3030616]
#INFO:	QUERY:	ENSMUSG00000104676	GM42777	predicted gene 42777 [Source:MGI Symbol;Acc:MGI:5662914]
#INFO:	QUERY:	ENSMUSG00000029925	TBXAS1	thromboxane A synthase 1, platelet [Source:MGI Symbol;Acc:MGI:98497]
#INFO:	QUERY:	ENSMUSG00000001494	SOST	sclerostin [Source:MGI Symbol;Acc:MGI:1921749]
#INFO:	QUERY:	ENSMUSG00000048620	OLFR1336	olfactory receptor 1336 [Source:MGI Symbol;Acc:MGI:3031170]
#INFO:	QUERY:	ENSMUSG00000092077	OLFR101	olfactory receptor 101 [Source:MGI Symbol;Acc:MGI:2177484]
#INFO:	QUERY:	ENSMUSG00000011350	GM5893	predicted gene 5893 [Source:MGI Symbol;Acc:MGI:3645761]
#INFO:	QUERY:	ENSMUSG00000055730	CES2A	carboxylesterase 2A [Source:MGI Symbol;Acc:MGI:2142491]
#INFO:	QUERY:	ENSMUSG00000038521	C1S1	complement component 1, s subcomponent 1 [Source:MGI Symbol;Acc:MGI:1355312]
#INFO:	QUERY:	ENSMUSG00000039081	ZFP503	zinc finger protein 503 [Source:MGI Symbol;Acc:MGI:1353644]
#INFO:	QUERY:	ENSMUSG00000106334	GM43549	predicted gene 43549 [Source:MGI Symbol;Acc:MGI:5663686]
#INFO:	QUERY:	ENSMUSG00000012520	PHOX2B	paired-like homeobox 2b [Source:MGI Symbol;Acc:MGI:1100882]
#INFO:	QUERY:	ENSMUSG00000063380	OLFR945	olfactory receptor 945 [Source:MGI Symbol;Acc:MGI:3030779]
#INFO:	QUERY:	ENSMUSG00000083064	GM7785	predicted gene 7785 [Source:MGI Symbol;Acc:MGI:3645449]
#INFO:	QUERY:	ENSMUSG00000108483	GM45184	predicted gene 45184 [Source:MGI Symbol;Acc:MGI:5753760]
#INFO:	QUERY:	ENSMUSG00000074653	LRRC31	leucine rich repeat containing 31 [Source:MGI Symbol;Acc:MGI:2443864]
#INFO:	QUERY:	ENSMUSG00000006538	IHH	Indian hedgehog [Source:MGI Symbol;Acc:MGI:96533]
#INFO:	QUERY:	ENSMUSG00000070979	ACTL7A	actin-like 7a [Source:MGI Symbol;Acc:MGI:1343051]
#INFO:	QUERY:	ENSMUSG00000087530	GM15533	predicted gene 15533 [Source:MGI Symbol;Acc:MGI:3782982]
#INFO:	QUERY:	ENSMUSG00000078706	GM53	predicted gene 53 [Source:MGI Symbol;Acc:MGI:2684899]
#INFO:	QUERY:	ENSMUSG00000073530	PAPPA2	pappalysin 2 [Source:MGI Symbol;Acc:MGI:3051647]
#INFO:	QUERY:	ENSMUSG00000028186	UOX	urate oxidase [Source:MGI Symbol;Acc:MGI:98907]
#INFO:	QUERY:	ENSMUSG00000104451	GM37831	predicted gene, 37831 [Source:MGI Symbol;Acc:MGI:5611059]
#INFO:	QUERY:	ENSMUSG00000009900	WNT3A	wingless-type MMTV integration site family, member 3A [Source:MGI Symbol;Acc:MGI:98956]
#INFO:	QUERY:	ENSMUSG00000097228	GM26597	predicted gene, 26597 [Source:MGI Symbol;Acc:MGI:5477091]
#INFO:	QUERY:	ENSMUSG00000032818	LOXHD1	lipoxygenase homology domains 1 [Source:MGI Symbol;Acc:MGI:1914609]
#INFO:	QUERY:	ENSMUSG00000050015	OLFR350	olfactory receptor 350 [Source:MGI Symbol;Acc:MGI:3030184]
#INFO:	QUERY:	ENSMUSG00000081245	GM6587	predicted gene 6587 [Source:MGI Symbol;Acc:MGI:3645486]
#INFO:	QUERY:	ENSMUSG00000019326	AOC3	amine oxidase, copper containing 3 [Source:MGI Symbol;Acc:MGI:1306797]
#INFO:	QUERY:	ENSMUSG00000046794	PPP1R3B	protein phosphatase 1, regulatory (inhibitor) subunit 3B [Source:MGI Symbol;Acc:MGI:2177268]
#INFO:	QUERY:	ENSMUSG00000099603	MRGPRC3-PS	MAS-related GPR, member C3, pseudogene [Source:MGI Symbol;Acc:MGI:3033196]
#INFO:	QUERY:	ENSMUSG00000074111	MRGPRA9	MAS-related GPR, member A9 [Source:MGI Symbol;Acc:MGI:3033148]
#INFO:	QUERY:	ENSMUSG00000094053	SCGB2B7	secretoglobin, family 2B, member 7 [Source:MGI Symbol;Acc:MGI:3782864]
#INFO:	QUERY:	ENSMUSG00000084196	GM12874	predicted gene 12874 [Source:MGI Symbol;Acc:MGI:3651901]
#INFO:	QUERY:	ENSMUSG00000092856	GM25956	predicted gene, 25956 [Source:MGI Symbol;Acc:MGI:5455733]
#INFO:	QUERY:	ENSMUSG00000085926	GM12299	predicted gene 12299 [Source:MGI Symbol;Acc:MGI:3652304]
#INFO:	QUERY:	ENSMUSG00000074868	GM6478	predicted pseudogene 6478 [Source:MGI Symbol;Acc:MGI:3647766]
#INFO:	QUERY:	ENSMUSG00000091163	GM3962	predicted gene 3962 [Source:MGI Symbol;Acc:MGI:3782136]
#INFO:	QUERY:	ENSMUSG00000104564	GM17977	predicted gene, 17977 [Source:MGI Symbol;Acc:MGI:5010162]
#INFO:	QUERY:	ENSMUSG00000066071	CYP4A12A	cytochrome P450, family 4, subfamily a, polypeptide 12a [Source:MGI Symbol;Acc:MGI:88612]
#INFO:	QUERY:	ENSMUSG00000106120	GM42697	predicted gene 42697 [Source:MGI Symbol;Acc:MGI:5662834]
#INFO:	QUERY:	ENSMUSG00000022439	PARVG	parvin, gamma [Source:MGI Symbol;Acc:MGI:2158329]
#INFO:	QUERY:	ENSMUSG00000035095	FAM167A	family with sequence similarity 167, member A [Source:MGI Symbol;Acc:MGI:3606565]
#INFO:	QUERY:	ENSMUSG00000104012	GM37364	predicted gene, 37364 [Source:MGI Symbol;Acc:MGI:5610592]
#INFO:	QUERY:	ENSMUSG00000044860	GM1123	predicted gene 1123 [Source:MGI Symbol;Acc:MGI:2685969]
#INFO:	QUERY:	ENSMUSG00000106486	GM9771	predicted gene 9771 [Source:MGI Symbol;Acc:MGI:3642065]
#INFO:	QUERY:	ENSMUSG00000106718	GM20052	predicted gene, 20052 [Source:MGI Symbol;Acc:MGI:5012237]
#INFO:	QUERY:	ENSMUSG00000052154	GM9870	predicted gene 9870 [Source:MGI Symbol;Acc:MGI:3708720]
#INFO:	QUERY:	ENSMUSG00000061311	RAG1	recombination activating gene 1 [Source:MGI Symbol;Acc:MGI:97848]
#INFO:	QUERY:	ENSMUSG00000022367	HAS2	hyaluronan synthase 2 [Source:MGI Symbol;Acc:MGI:107821]
#INFO:	QUERY:	ENSMUSG00000081335	GM15786	predicted gene 15786 [Source:MGI Symbol;Acc:MGI:3783228]
#INFO:	QUERY:	ENSMUSG00000022676	SNAI2	snail family zinc finger 2 [Source:MGI Symbol;Acc:MGI:1096393]
#INFO:	QUERY:	ENSMUSG00000026226	SPATA3	spermatogenesis associated 3 [Source:MGI Symbol;Acc:MGI:1917310]
#INFO:	QUERY:	ENSMUSG00000053420	GM4792	predicted gene 4792 [Source:MGI Symbol;Acc:MGI:3648918]
#INFO:	QUERY:	ENSMUSG00000086001	GM13448	predicted gene 13448 [Source:MGI Symbol;Acc:MGI:3651456]
#INFO:	QUERY:	ENSMUSG00000079293	CLEC7A	C-type lectin domain family 7, member a [Source:MGI Symbol;Acc:MGI:1861431]
#INFO:	QUERY:	ENSMUSG00000100334	C230024C17RIK	RIKEN cDNA C230024C17 gene [Source:MGI Symbol;Acc:MGI:5439413]
#INFO:	QUERY:	ENSMUSG00000084973	GM13848	predicted gene 13848 [Source:MGI Symbol;Acc:MGI:3651996]
#INFO:	QUERY:	ENSMUSG00000081563	GM12635	predicted gene 12635 [Source:MGI Symbol;Acc:MGI:3650766]
#INFO:	QUERY:	ENSMUSG00000100497	GM28624	predicted gene 28624 [Source:MGI Symbol;Acc:MGI:5579330]
#INFO:	QUERY:	ENSMUSG00000028874	FGR	FGR proto-oncogene, Src family tyrosine kinase [Source:MGI Symbol;Acc:MGI:95527]
#INFO:	QUERY:	ENSMUSG00000097609	GM26659	predicted gene, 26659 [Source:MGI Symbol;Acc:MGI:5477153]
#INFO:	QUERY:	ENSMUSG00000069670	NKAIN2	Na+/K+ transporting ATPase interacting 2 [Source:MGI Symbol;Acc:MGI:1923447]
#INFO:	QUERY:	ENSMUSG00000101257	2310015K22RIK	RIKEN cDNA 2310015K22 gene [Source:MGI Symbol;Acc:MGI:1916815]
#INFO:	QUERY:	ENSMUSG00000048938	NR1H5	nuclear receptor subfamily 1, group H, member 5 [Source:MGI Symbol;Acc:MGI:3026618]
#INFO:	QUERY:	ENSMUSG00000091491	VMN2R97	vomeronasal 2, receptor 97 [Source:MGI Symbol;Acc:MGI:3645271]
#INFO:	QUERY:	ENSMUSG00000109066	GM4585	predicted gene 4585 [Source:MGI Symbol;Acc:MGI:3782768]
#INFO:	QUERY:	ENSMUSG00000064039	CCR1L1	chemokine (C-C motif) receptor 1-like 1 [Source:MGI Symbol;Acc:MGI:104617]
#INFO:	QUERY:	ENSMUSG00000100301	6030407O03RIK	RIKEN cDNA 6030407O03 gene [Source:MGI Symbol;Acc:MGI:1924410]
#INFO:	QUERY:	ENSMUSG00000064063	BC048507	cDNA sequence BC048507 [Source:MGI Symbol;Acc:MGI:3040680]
#INFO:	QUERY:	ENSMUSG00000027577	CHRNA4	cholinergic receptor, nicotinic, alpha polypeptide 4 [Source:MGI Symbol;Acc:MGI:87888]
#INFO:	QUERY:	ENSMUSG00000095148	GM20873	predicted gene, 20873 [Source:MGI Symbol;Acc:MGI:5434229]
#INFO:	QUERY:	ENSMUSG00000067649	MAGEB18	melanoma antigen family B, 18 [Source:MGI Symbol;Acc:MGI:3045344]
#INFO:	QUERY:	ENSMUSG00000026700	TNFSF4	tumor necrosis factor (ligand) superfamily, member 4 [Source:MGI Symbol;Acc:MGI:104511]
#INFO:	QUERY:	ENSMUSG00000040163	1700034J05RIK	RIKEN cDNA 1700034J05 gene [Source:MGI Symbol;Acc:MGI:1920594]
#INFO:	QUERY:	ENSMUSG00000060556	OLFR1418	olfactory receptor 1418 [Source:MGI Symbol;Acc:MGI:3031252]
#INFO:	QUERY:	ENSMUSG00000086256	GM12052	predicted gene 12052 [Source:MGI Symbol;Acc:MGI:3652305]
#INFO:	QUERY:	ENSMUSG00000104563	GM43041	predicted gene 43041 [Source:MGI Symbol;Acc:MGI:5663178]
#INFO:	QUERY:	ENSMUSG00000103370	GM37178	predicted gene, 37178 [Source:MGI Symbol;Acc:MGI:5610406]
#INFO:	QUERY:	ENSMUSG00000108337	GM4971	predicted gene 4971 [Source:MGI Symbol;Acc:MGI:3643321]
#INFO:	QUERY:	ENSMUSG00000087202	GM15813	predicted gene 15813 [Source:MGI Symbol;Acc:MGI:3801815]
#INFO:	QUERY:	ENSMUSG00000098065	GM5177	predicted pseudogene 5177 [Source:MGI Symbol;Acc:MGI:3646657]
#INFO:	QUERY:	ENSMUSG00000053977	CD8A	CD8 antigen, alpha chain [Source:MGI Symbol;Acc:MGI:88346]
#INFO:	QUERY:	ENSMUSG00000044899	OLFR649	olfactory receptor 649 [Source:MGI Symbol;Acc:MGI:3030483]
#INFO:	QUERY:	ENSMUSG00000106458	GM42633	predicted gene 42633 [Source:MGI Symbol;Acc:MGI:5662770]
#INFO:	QUERY:	ENSMUSG00000041052	SLC7A13	solute carrier family 7, (cationic amino acid transporter, y+ system) member 13 [Source:MGI Symbol;Acc:MGI:1921337]
#INFO:	QUERY:	ENSMUSG00000048485	ZBTB8B	zinc finger and BTB domain containing 8b [Source:MGI Symbol;Acc:MGI:2387181]
#INFO:	QUERY:	ENSMUSG00000100671	GM28322	predicted gene 28322 [Source:MGI Symbol;Acc:MGI:5579028]
#INFO:	QUERY:	ENSMUSG00000100204	GM4849	predicted gene 4849 [Source:MGI Symbol;Acc:MGI:3645366]
#INFO:	QUERY:	ENSMUSG00000101701	4930521E06RIK	RIKEN cDNA 4930521E06 gene [Source:MGI Symbol;Acc:MGI:1922316]
#INFO:	QUERY:	ENSMUSG00000105680	GM18340	predicted gene, 18340 [Source:MGI Symbol;Acc:MGI:5010525]
#INFO:	QUERY:	ENSMUSG00000084278	GM12189	predicted gene 12189 [Source:MGI Symbol;Acc:MGI:3650668]
#INFO:	QUERY:	ENSMUSG00000085183	GM12603	predicted gene 12603 [Source:MGI Symbol;Acc:MGI:3649757]
#INFO:	QUERY:	ENSMUSG00000033777	TLR13	toll-like receptor 13 [Source:MGI Symbol;Acc:MGI:3045213]
#INFO:	QUERY:	ENSMUSG00000039518	CDSN	corneodesmosin [Source:MGI Symbol;Acc:MGI:3505689]
#INFO:	QUERY:	ENSMUSG00000101799	9330175M20RIK	RIKEN cDNA 9330175M20 gene [Source:MGI Symbol;Acc:MGI:3045285]
#INFO:	QUERY:	ENSMUSG00000096144	B020004C17RIK	RIKEN cDNA B020004C17 gene [Source:MGI Symbol;Acc:MGI:3588236]
#INFO:	QUERY:	ENSMUSG00000043102	QRFP	pyroglutamylated RFamide peptide [Source:MGI Symbol;Acc:MGI:3630329]
#INFO:	QUERY:	ENSMUSG00000046490	RNF222	ring finger protein 222 [Source:MGI Symbol;Acc:MGI:2443227]
#INFO:	QUERY:	ENSMUSG00000031936	HEPHL1	hephaestin-like 1 [Source:MGI Symbol;Acc:MGI:2685355]
#INFO:	QUERY:	ENSMUSG00000046411	RPS4L-PS	ribosomal protein S4-like, pseudogene [Source:MGI Symbol;Acc:MGI:3648347]
#INFO:	QUERY:	ENSMUSG00000078624	OLFR613	olfactory receptor 613 [Source:MGI Symbol;Acc:MGI:3030447]
#INFO:	QUERY:	ENSMUSG00000101332	GM28240	predicted gene 28240 [Source:MGI Symbol;Acc:MGI:5578946]
#INFO:	QUERY:	ENSMUSG00000062818	VMN1R51	vomeronasal 1 receptor 51 [Source:MGI Symbol;Acc:MGI:1333759]
#INFO:	QUERY:	ENSMUSG00000030143	GM8882	predicted gene 8882 [Source:MGI Symbol;Acc:MGI:3645847]
#INFO:	QUERY:	ENSMUSG00000103118	GM37582	predicted gene, 37582 [Source:MGI Symbol;Acc:MGI:5610810]
#INFO:	QUERY:	ENSMUSG00000028600	PODN	podocan [Source:MGI Symbol;Acc:MGI:2674939]
#INFO:	QUERY:	ENSMUSG00000030905	CRYM	crystallin, mu [Source:MGI Symbol;Acc:MGI:102675]
#INFO:	QUERY:	ENSMUSG00000106991	GM43399	predicted gene 43399 [Source:MGI Symbol;Acc:MGI:5663536]
#INFO:	QUERY:	ENSMUSG00000026546	CFAP45	cilia and flagella associated protein 45 [Source:MGI Symbol;Acc:MGI:1919120]
#INFO:	QUERY:	ENSMUSG00000059112	OLFR1263	olfactory receptor 1263 [Source:MGI Symbol;Acc:MGI:3031097]
#INFO:	QUERY:	ENSMUSG00000103080	GM38123	predicted gene, 38123 [Source:MGI Symbol;Acc:MGI:5611351]
#INFO:	QUERY:	ENSMUSG00000037544	DLGAP5	discs, large (Drosophila) homolog-associated protein 5 [Source:MGI Symbol;Acc:MGI:2183453]
#INFO:	QUERY:	ENSMUSG00000096405	4930474N05RIK	RIKEN cDNA 4930474N05 gene [Source:MGI Symbol;Acc:MGI:3586330]
#INFO:	QUERY:	ENSMUSG00000089901	GM8113	predicted gene 8113 [Source:MGI Symbol;Acc:MGI:3648791]
#INFO:	QUERY:	ENSMUSG00000068431	OLFR742	olfactory receptor 742 [Source:MGI Symbol;Acc:MGI:3030576]
#INFO:	QUERY:	ENSMUSG00000104375	GM6300	predicted gene 6300 [Source:MGI Symbol;Acc:MGI:3648364]
#INFO:	QUERY:	ENSMUSG00000053228	CEACAM3	carcinoembryonic antigen-related cell adhesion molecule 3 [Source:MGI Symbol;Acc:MGI:3646296]
#INFO:	QUERY:	ENSMUSG00000027579	SRMS	src-related kinase lacking C-terminal regulatory tyrosine and N-terminal myristylation sites [Source:MGI Symbol;Acc:MGI:101865]
#INFO:	QUERY:	ENSMUSG00000074647	FAM83C	family with sequence similarity 83, member C [Source:MGI Symbol;Acc:MGI:1918655]
#INFO:	QUERY:	ENSMUSG00000098240	GM4575	predicted gene 4575 [Source:MGI Symbol;Acc:MGI:3782758]
#INFO:	QUERY:	ENSMUSG00000083813	GM15502	predicted gene 15502 [Source:MGI Symbol;Acc:MGI:3782949]
#INFO:	QUERY:	ENSMUSG00000107743	GM44087	predicted gene, 44087 [Source:MGI Symbol;Acc:MGI:5690479]
#INFO:	QUERY:	ENSMUSG00000031373	CAR5B	carbonic anhydrase 5b, mitochondrial [Source:MGI Symbol;Acc:MGI:1926249]
#INFO:	QUERY:	ENSMUSG00000025330	PADI4	peptidyl arginine deiminase, type IV [Source:MGI Symbol;Acc:MGI:1338898]
#INFO:	QUERY:	ENSMUSG00000058186	ZFP980	zinc finger protein 980 [Source:MGI Symbol;Acc:MGI:3712454]
#INFO:	QUERY:	ENSMUSG00000060034	CTF2	cardiotrophin 2 [Source:MGI Symbol;Acc:MGI:2684607]
#INFO:	QUERY:	ENSMUSG00000085987	GM13403	predicted gene 13403 [Source:MGI Symbol;Acc:MGI:3649380]
#INFO:	QUERY:	ENSMUSG00000103459	GM38096	predicted gene, 38096 [Source:MGI Symbol;Acc:MGI:5611324]
#INFO:	QUERY:	ENSMUSG00000031831	DNAAF1	dynein, axonemal assembly factor 1 [Source:MGI Symbol;Acc:MGI:1915520]
#INFO:	QUERY:	ENSMUSG00000049608	GPR55	G protein-coupled receptor 55 [Source:MGI Symbol;Acc:MGI:2685064]
#INFO:	QUERY:	ENSMUSG00000073974	OLFR551	olfactory receptor 551 [Source:MGI Symbol;Acc:MGI:3030385]
#INFO:	QUERY:	ENSMUSG00000047048	OLFR432	olfactory receptor 432 [Source:MGI Symbol;Acc:MGI:3030266]
#INFO:	QUERY:	ENSMUSG00000040140	TDRD6	tudor domain containing 6 [Source:MGI Symbol;Acc:MGI:2679727]
#INFO:	QUERY:	ENSMUSG00000051378	KIF18B	kinesin family member 18B [Source:MGI Symbol;Acc:MGI:2446979]
#INFO:	QUERY:	ENSMUSG00000105728	GM42819	predicted gene 42819 [Source:MGI Symbol;Acc:MGI:5662956]
#INFO:	QUERY:	ENSMUSG00000109193	GM39027	predicted gene, 39027 [Source:MGI Symbol;Acc:MGI:5621912]
#INFO:	QUERY:	ENSMUSG00000075149	OLFR1138	olfactory receptor 1138 [Source:MGI Symbol;Acc:MGI:3030972]
#INFO:	QUERY:	ENSMUSG00000043639	RBM20	RNA binding motif protein 20 [Source:MGI Symbol;Acc:MGI:1920963]
#INFO:	QUERY:	ENSMUSG00000024366	GFRA3	glial cell line derived neurotrophic factor family receptor alpha 3 [Source:MGI Symbol;Acc:MGI:1201403]
#INFO:	QUERY:	ENSMUSG00000100151	GM28382	predicted gene 28382 [Source:MGI Symbol;Acc:MGI:5579088]
#INFO:	QUERY:	ENSMUSG00000008136	FHL2	four and a half LIM domains 2 [Source:MGI Symbol;Acc:MGI:1338762]
#INFO:	QUERY:	ENSMUSG00000026322	HTR4	5 hydroxytryptamine (serotonin) receptor 4 [Source:MGI Symbol;Acc:MGI:109246]
#INFO:	QUERY:	ENSMUSG00000092109	GM9376	predicted gene 9376 [Source:MGI Symbol;Acc:MGI:3643023]
#INFO:	QUERY:	ENSMUSG00000091462	GM17084	predicted gene 17084 [Source:MGI Symbol;Acc:MGI:4937911]
#INFO:	QUERY:	ENSMUSG00000070604	VSIG10L	V-set and immunoglobulin domain containing 10 like [Source:MGI Symbol;Acc:MGI:1922940]
#INFO:	QUERY:	ENSMUSG00000086537	NESPAS	neuroendocrine secretory protein antisense [Source:MGI Symbol;Acc:MGI:1861674]
#INFO:	QUERY:	ENSMUSG00000097372	GM26876	predicted gene, 26876 [Source:MGI Symbol;Acc:MGI:5477370]
#INFO:	QUERY:	ENSMUSG00000104799	GM9361	predicted gene 9361 [Source:MGI Symbol;Acc:MGI:3643912]
#INFO:	QUERY:	ENSMUSG00000086432	B430119L08RIK	RIKEN cDNA B430119L08 gene [Source:MGI Symbol;Acc:MGI:2441857]
#INFO:	QUERY:	ENSMUSG00000041482	PIEZO2	piezo-type mechanosensitive ion channel component 2 [Source:MGI Symbol;Acc:MGI:1918781]
#INFO:	QUERY:	ENSMUSG00000109534	GM44842	predicted gene 44842 [Source:MGI Symbol;Acc:MGI:5753418]
#INFO:	QUERY:	ENSMUSG00000026715	SERPINC1	serine (or cysteine) peptidase inhibitor, clade C (antithrombin), member 1 [Source:MGI Symbol;Acc:MGI:88095]
#INFO:	QUERY:	ENSMUSG00000105392	GM42684	predicted gene 42684 [Source:MGI Symbol;Acc:MGI:5662821]
#INFO:	QUERY:	ENSMUSG00000061462	OBSCN	obscurin, cytoskeletal calmodulin and titin-interacting RhoGEF [Source:MGI Symbol;Acc:MGI:2681862]
#INFO:	QUERY:	ENSMUSG00000054667	IRS4	insulin receptor substrate 4 [Source:MGI Symbol;Acc:MGI:1338009]
#INFO:	QUERY:	ENSMUSG00000027400	PDYN	prodynorphin [Source:MGI Symbol;Acc:MGI:97535]
#INFO:	QUERY:	ENSMUSG00000081121	GM12791	predicted gene 12791 [Source:MGI Symbol;Acc:MGI:3649397]
#INFO:	QUERY:	ENSMUSG00000083107	GM5303	predicted gene 5303 [Source:MGI Symbol;Acc:MGI:3647388]
#INFO:	QUERY:	ENSMUSG00000079440	ALPI	alkaline phosphatase, intestinal [Source:MGI Symbol;Acc:MGI:1924018]
#INFO:	QUERY:	ENSMUSG00000020303	STC2	stanniocalcin 2 [Source:MGI Symbol;Acc:MGI:1316731]
#INFO:	QUERY:	ENSMUSG00000101548	GM9220	predicted gene 9220 [Source:MGI Symbol;Acc:MGI:3648318]
#INFO:	QUERY:	ENSMUSG00000061728	BTNL7-PS	butyrophilin-like 7, pseudogene [Source:MGI Symbol;Acc:MGI:2388054]
#INFO:	QUERY:	ENSMUSG00000101792	GM28447	predicted gene 28447 [Source:MGI Symbol;Acc:MGI:5579153]
#INFO:	QUERY:	ENSMUSG00000104763	9830132P13RIK	RIKEN cDNA 9830132P13 gene [Source:MGI Symbol;Acc:MGI:5439414]
#INFO:	QUERY:	ENSMUSG00000103100	GM37664	predicted gene, 37664 [Source:MGI Symbol;Acc:MGI:5610892]
#INFO:	QUERY:	ENSMUSG00000082937	GM15095	predicted gene 15095 [Source:MGI Symbol;Acc:MGI:3705829]
#INFO:	QUERY:	ENSMUSG00000073897	OLFR17	olfactory receptor 17 [Source:MGI Symbol;Acc:MGI:109148]
#INFO:	QUERY:	ENSMUSG00000044294	KRT84	keratin 84 [Source:MGI Symbol;Acc:MGI:96700]
#INFO:	QUERY:	ENSMUSG00000107971	GM44260	predicted gene, 44260 [Source:MGI Symbol;Acc:MGI:5690652]
#INFO:	QUERY:	ENSMUSG00000094898	VMN1R201	vomeronasal 1 receptor 201 [Source:MGI Symbol;Acc:MGI:2159690]
#INFO:	QUERY:	ENSMUSG00000108072	GM20362	predicted gene, 20362 [Source:MGI Symbol;Acc:MGI:5012547]
#INFO:	QUERY:	ENSMUSG00000070984	N/A	N/A
#INFO:	QUERY:	ENSMUSG00000097493	9930014A18RIK	RIKEN cDNA 9930014A18 gene [Source:MGI Symbol;Acc:MGI:2444091]
#INFO:	QUERY:	ENSMUSG00000070990	FOXE1	forkhead box E1 [Source:MGI Symbol;Acc:MGI:1353500]
#INFO:	QUERY:	ENSMUSG00000108865	GM44617	predicted gene 44617 [Source:MGI Symbol;Acc:MGI:5753193]
#INFO:	QUERY:	ENSMUSG00000050772	OLFR1124	olfactory receptor 1124 [Source:MGI Symbol;Acc:MGI:3030958]
#INFO:	QUERY:	ENSMUSG00000020434	4921536K21RIK	RIKEN cDNA 4921536K21 gene [Source:MGI Symbol;Acc:MGI:1914680]
#INFO:	QUERY:	ENSMUSG00000022455	WBP2NL	WBP2 N-terminal like [Source:MGI Symbol;Acc:MGI:1921966]
#INFO:	QUERY:	ENSMUSG00000107918	GM8999	predicted gene 8999 [Source:MGI Symbol;Acc:MGI:3647166]
#INFO:	QUERY:	ENSMUSG00000021789	SFTPA1	surfactant associated protein A1 [Source:MGI Symbol;Acc:MGI:109518]
#INFO:	QUERY:	ENSMUSG00000101895	GM28981	predicted gene 28981 [Source:MGI Symbol;Acc:MGI:5579687]
#INFO:	QUERY:	ENSMUSG00000102405	GM37863	predicted gene, 37863 [Source:MGI Symbol;Acc:MGI:5611091]
#INFO:	QUERY:	ENSMUSG00000087410	2310065F04RIK	RIKEN cDNA 2310065F04 gene [Source:MGI Symbol;Acc:MGI:1921434]
#INFO:	QUERY:	ENSMUSG00000108948	OLFR695	olfactory receptor 695 [Source:MGI Symbol;Acc:MGI:3030529]
#INFO:	QUERY:	ENSMUSG00000099701	GM19136	predicted gene, 19136 [Source:MGI Symbol;Acc:MGI:5011321]
#INFO:	QUERY:	ENSMUSG00000086564	CD101	CD101 antigen [Source:MGI Symbol;Acc:MGI:2685862]
#INFO:	QUERY:	ENSMUSG00000091368	GM17085	predicted gene 17085 [Source:MGI Symbol;Acc:MGI:4937912]
#INFO:	QUERY:	ENSMUSG00000031965	TBX20	T-box 20 [Source:MGI Symbol;Acc:MGI:1888496]
#INFO:	QUERY:	ENSMUSG00000047730	FCGBP	Fc fragment of IgG binding protein [Source:MGI Symbol;Acc:MGI:2444336]
#INFO:	QUERY:	ENSMUSG00000028860	SYTL1	synaptotagmin-like 1 [Source:MGI Symbol;Acc:MGI:1933365]
#INFO:	QUERY:	ENSMUSG00000104002	GM38336	predicted gene, 38336 [Source:MGI Symbol;Acc:MGI:5611564]
#INFO:	QUERY:	ENSMUSG00000067878	MAP7D3	MAP7 domain containing 3 [Source:MGI Symbol;Acc:MGI:2445051]
#INFO:	QUERY:	ENSMUSG00000070527	MKRN3	makorin, ring finger protein, 3 [Source:MGI Symbol;Acc:MGI:2181178]
[truncated: 5,229 more rows]
