# Supplementary material for: Ablation of STAT3 in Purkinje cells reorganizes cerebellar synaptic plasticity in long-term fear memory network
Source: eLife. 2021 Jan 18;10:e63291. doi: 10.7554/eLife.63291 (PMC7813544; doi:10.7554/eLife.63291)
Supplement: Figure 2—source data 5. [file elife-63291-fig2-data5.xlsx]

## Sheet: DEG
Gene	baseMean	log2FoldChange	lfcSE	stat	pvalue	padj
ENSMUSG00000000001_Gnai3	60.9811	0.628438	0.347801	1.80689	0.0707796	0.176039
ENSMUSG00000000028_Cdc45	4.64374	-0.120011	0.795268	-0.150906	0.88005	0.922983
ENSMUSG00000000031_H19	7.46949	-1.88832	0.765564	-2.46658	0.0136411	0.0635443
ENSMUSG00000000037_Scml2	1.35014	-0.31045	0.764115	-0.406287	0.684532	NA
ENSMUSG00000000049_Apoh	0.965168	-1.05098	0.749985	-1.40133	0.161114	NA
ENSMUSG00000000056_Narf	115.946	0.659704	0.323673	2.03818	0.041532	0.125977
ENSMUSG00000000058_Cav2	14.0662	-0.482424	0.594669	-0.811247	0.417224	0.558858
ENSMUSG00000000078_Klf6	32.1613	0.32672	0.444913	0.734345	0.462738	0.599828
ENSMUSG00000000085_Scmh1	86.2607	0.0765502	0.307492	0.24895	0.803399	0.868379
ENSMUSG00000000088_Cox5a	86.6097	1.0723	0.357514	2.99933	0.0027057	0.0241057
ENSMUSG00000000093_Tbx2	5.50711	-1.8782	0.810003	-2.31876	0.0204083	0.0807542
ENSMUSG00000000094_Tbx4	6.95802	-1.26055	0.78301	-1.60988	0.107424	0.228128
ENSMUSG00000000103_Zfy2	1.45247	-0.671932	0.777226	-0.864526	0.387299	NA
ENSMUSG00000000120_Ngfr	20.4375	-0.0486881	0.553148	-0.0880201	0.929861	0.956055
ENSMUSG00000000125_Wnt3	33.8691	0.365343	0.436666	0.836664	0.402781	0.546188
ENSMUSG00000000126_Wnt9a	6.03521	-2.90768	0.803619	-3.61823	0.000296619	0.00633729
ENSMUSG00000000127_Fer	81.3908	0.521871	0.302505	1.72516	0.0844979	0.196246
ENSMUSG00000000131_Xpo6	168.165	-0.422452	0.230059	-1.83628	0.0663165	0.169258
ENSMUSG00000000134_Tfe3	42.1679	-0.0787898	0.411092	-0.19166	0.848009	0.90079
ENSMUSG00000000142_Axin2	41.6229	-0.276883	0.40028	-0.691723	0.489111	0.622455
ENSMUSG00000000148_Brat1	38.6244	-0.847657	0.423909	-1.99962	0.0455413	0.133632
ENSMUSG00000000149_Gna12	57.4033	0.807686	0.371113	2.17639	0.029526	0.101943
ENSMUSG00000000154_Slc22a18	0.269776	-0.188905	0.604589	-0.312452	0.754697	NA
ENSMUSG00000000157_Itgb2l	1.57565	-0.755736	0.812015	-0.930692	0.352013	NA
ENSMUSG00000000159_Igsf5	8.34424	-1.78771	0.753796	-2.37161	0.0177106	0.0742081
ENSMUSG00000000167_Pih1d2	8.48144	-1.16471	0.705957	-1.64983	0.0989785	0.216515
ENSMUSG00000000168_Dlat	166.299	0.720602	0.279614	2.57713	0.00996242	0.052794
ENSMUSG00000000171_Sdhd	78.0709	0.695728	0.327903	2.12175	0.0338588	0.110504
ENSMUSG00000000182_Fgf23	4.18647	-0.537027	0.812918	-0.660617	0.508858	0.639952
ENSMUSG00000000183_Fgf6	20.6265	-1.15936	0.609104	-1.90338	0.0569906	0.153387
ENSMUSG00000000184_Ccnd2	34.8023	-1.96444	0.510123	-3.8509	0.000117683	0.00368472
ENSMUSG00000000194_Gpr107	110.305	-0.149628	0.291965	-0.512485	0.608312	0.721982
ENSMUSG00000000197_Nalcn	153.973	0.866695	0.247745	3.49834	0.000468161	0.00834769
ENSMUSG00000000202_Btbd17	37.9189	0.135243	0.415718	0.325324	0.744936	0.824658
ENSMUSG00000000204_Slfn4	5.42237	-1.24394	0.836181	-1.48765	0.136844	0.267465
ENSMUSG00000000214_Th	21.5862	1.58929	0.557555	2.85046	0.00436556	0.0323706
ENSMUSG00000000215_Ins2	0.65443	-0.667739	0.661464	-1.00949	0.312741	NA
ENSMUSG00000000216_Scnn1g	6.47374	-1.12707	0.749117	-1.50454	0.132443	0.261894
ENSMUSG00000000223_Drp2	55.0837	0.106105	0.352836	0.300721	0.763627	0.838626
ENSMUSG00000000244_Tspan32	12.7618	-1.87932	0.653849	-2.87425	0.00404992	0.0311298
ENSMUSG00000000247_Lhx2	12.7791	-2.36498	0.694019	-3.40766	0.00065522	0.010228
ENSMUSG00000000248_Clec2g	4.6219	-1.05356	0.824876	-1.27723	0.20152	0.344387
ENSMUSG00000000253_Gmpr	14.4078	0.451915	0.599009	0.754437	0.450587	0.589018
ENSMUSG00000000263_Glra1	8.66596	-0.312084	0.69017	-0.452184	0.651136	0.755615
ENSMUSG00000000266_Mid2	83.6083	0.867013	0.313539	2.76524	0.00568802	0.0380169
ENSMUSG00000000275_Trim25	17.3004	-1.22757	0.574494	-2.13679	0.032615	0.108196
ENSMUSG00000000276_Dgke	128.835	0.691052	0.279717	2.47054	0.0134908	0.0631584
ENSMUSG00000000278_Scpep1	9.15772	0.552873	0.681129	0.8117	0.416964	0.558613
ENSMUSG00000000282_Mnt	30.8762	-0.236121	0.432458	-0.545997	0.585068	0.703715
ENSMUSG00000000290_Itgb2	5.89035	-1.4682	0.795024	-1.84673	0.0647861	0.167049
ENSMUSG00000000295_Hddc2	14.7355	-0.40356	0.588447	-0.685804	0.492837	0.62592
ENSMUSG00000000296_Tpd52l1	15.603	-0.23412	0.599728	-0.390377	0.696258	0.790122
ENSMUSG00000000301_Pemt	1.18493	0.238018	0.793802	0.299846	0.764295	NA
ENSMUSG00000000303_Cdh1	17.326	-0.2363	0.543004	-0.435172	0.663437	0.764815
ENSMUSG00000000305_Cdh4	64.8589	0.496023	0.3351	1.48022	0.138814	0.269985
ENSMUSG00000000308_Ckmt1	222.194	0.82545	0.256859	3.21363	0.00131067	0.0155088
ENSMUSG00000000317_Bcl6b	11.0981	-1.06698	0.688895	-1.54883	0.121422	0.246812
ENSMUSG00000000318_Clec10a	2.76902	-0.781183	0.848532	-0.920629	0.357244	0.503614
ENSMUSG00000000320_Alox12	7.93846	-2.66564	0.743514	-3.58519	0.000336828	0.006901
ENSMUSG00000000325_Arvcf	27.0331	0.0830219	0.470522	0.176446	0.859943	0.908353
ENSMUSG00000000326_Comt	37.0361	0.269427	0.415938	0.647758	0.517141	0.647248
ENSMUSG00000000339_Rtca	49.7457	0.563418	0.372255	1.51353	0.130145	0.258797
ENSMUSG00000000340_Dbt	37.2346	0.240091	0.437298	0.549034	0.582982	0.702626
ENSMUSG00000000346_Dazap2	70.8065	0.729167	0.327504	2.22644	0.0259847	0.0944262
ENSMUSG00000000355_Mcts1	28.0904	0.604581	0.47512	1.27248	0.203203	0.346398
ENSMUSG00000000359_Rem1	7.62422	-3.30111	0.809611	-4.0774	4.55e-05	0.00207383
ENSMUSG00000000365_Rnf17	11.1722	-0.235042	0.644014	-0.364964	0.715139	0.803856
ENSMUSG00000000374_Trappc10	74.9244	0.728002	0.317331	2.29414	0.0217823	0.0842616
ENSMUSG00000000378_Ccm2	61.8678	-0.107677	0.330128	-0.326168	0.744297	0.824127
ENSMUSG00000000381_Wap	1.02135	-0.961175	0.73286	-1.31154	0.189675	NA
ENSMUSG00000000384_Tbrg4	13.8868	0.657589	0.61837	1.06342	0.28759	0.437015
ENSMUSG00000000385_Tmprss2	2.96407	-0.714429	0.842823	-0.847662	0.396626	0.53989
ENSMUSG00000000386_Mx1	4.71136	-1.7329	0.796646	-2.17524	0.0296119	0.102131
ENSMUSG00000000392_Fap	4.85154	-0.00154156	0.806559	-0.00191128	0.998475	0.998978
ENSMUSG00000000394_Gcg	1.4319	-0.719147	0.816425	-0.880849	0.3784	NA
ENSMUSG00000000399_Ndufa9	88.3046	0.500051	0.286634	1.74456	0.0810612	0.191431
ENSMUSG00000000402_Egfl6	2.30723	-0.544847	0.847873	-0.642604	0.520481	0.649915
ENSMUSG00000000409_Lck	6.23876	-1.79506	0.793202	-2.26305	0.0236326	0.0888165
ENSMUSG00000000411_Tssk3	3.85311	-1.31858	0.823706	-1.60078	0.109425	0.230725
ENSMUSG00000000416_Cttnbp2	387.113	0.314183	0.209822	1.49738	0.134294	0.264098
ENSMUSG00000000420_Galnt1	132.062	0.549987	0.260122	2.11434	0.0344862	0.111958
ENSMUSG00000000435_Myf5	3.53376	-2.17997	0.849233	-2.56699	0.0102586	0.053813
ENSMUSG00000000439_Mkrn2	69.1305	0.218337	0.329499	0.662634	0.507565	0.639042
ENSMUSG00000000440_Pparg	9.6058	0.280851	0.660245	0.425374	0.670564	0.770022
ENSMUSG00000000441_Raf1	90.8447	0.611744	0.304732	2.00748	0.0446985	0.132045
ENSMUSG00000000486_Sept1	11.8738	-1.40491	0.628463	-2.23547	0.0253865	0.093038
ENSMUSG00000000489_Pdgfb	8.16731	-1.34322	0.722988	-1.85788	0.0631865	0.164093
ENSMUSG00000000530_Acvrl1	6.24599	-0.503281	0.810316	-0.621092	0.534539	0.661614
ENSMUSG00000000531_Grasp	4.24446	-0.378826	0.819822	-0.462084	0.644021	0.750225
ENSMUSG00000000532_Acvr1b	51.8873	0.900871	0.3703	2.43281	0.014982	0.0669355
ENSMUSG00000000538_Tom1l2	229.741	0.672845	0.202041	3.33024	0.000867697	0.0121813
ENSMUSG00000000544_Gpa33	5.71599	-1.60117	0.794172	-2.01616	0.0437838	0.130327
ENSMUSG00000000552_Zfp385a	78.0772	0.378729	0.353697	1.07077	0.284272	0.433799
ENSMUSG00000000555_Itga5	5.78499	-1.4324	0.781085	-1.83386	0.0666745	0.169692
ENSMUSG00000000560_Gabra2	109.38	0.0476066	0.263429	0.180719	0.856588	0.906218
ENSMUSG00000000561_Wdr77	51.9869	0.0878082	0.380529	0.230753	0.817507	0.878918
ENSMUSG00000000562_Adora3	7.70676	-1.94901	0.792078	-2.46063	0.0138694	0.064117
ENSMUSG00000000563_Atp5f1	297.059	0.764143	0.227401	3.36033	0.000778482	0.0114061
ENSMUSG00000000567_Sox9	162.569	0.3318	0.262402	1.26447	0.20606	0.349487
ENSMUSG00000000568_Hnrnpd	418.596	0.199987	0.234603	0.852449	0.393965	0.537564
ENSMUSG00000000579_Dynlt1c	42.5903	-0.731474	0.40952	-1.78618	0.0740708	0.181153
ENSMUSG00000000581_C1d	32.7695	0.48709	0.445224	1.09403	0.273941	0.42264
ENSMUSG00000000594_Gm2a	54.8156	0.99964	0.37097	2.69466	0.007046	0.0427826
ENSMUSG00000000600_Krit1	186.907	0.131318	0.24326	0.539827	0.589316	0.707108
ENSMUSG00000000605_Clcn4	197.941	0.983297	0.228919	4.29539	1.74e-05	0.00112281
ENSMUSG00000000606_Vmn2r88	1.92594	-0.514665	0.834377	-0.616825	0.53735	NA
ENSMUSG00000000617_Grm6	8.72227	-1.50253	0.753339	-1.99449	0.0460988	0.134627
ENSMUSG00000000627_Sema4f	36.7597	0.547484	0.43591	1.25596	0.209132	0.35259
ENSMUSG00000000628_Hk2	71.1244	0.213703	0.323359	0.660885	0.508686	0.639905
ENSMUSG00000000631_Myo18a	408.852	0.342102	0.19497	1.75464	0.0793205	0.188893
ENSMUSG00000000632_Sez6	65.7302	0.608804	0.358705	1.69723	0.0896535	0.203693
ENSMUSG00000000682_Cd52	0.657726	-0.345138	0.690664	-0.499719	0.617273	NA
ENSMUSG00000000686_Abhd15	10.2262	-1.44476	0.702545	-2.05647	0.039737	0.122429
ENSMUSG00000000690_Hoxb6	7.6607	-2.09914	0.729538	-2.87736	0.0040102	0.0309442
ENSMUSG00000000693_Loxl3	15.6736	-1.19758	0.599038	-1.99918	0.0455888	0.133718
ENSMUSG00000000701_Tcl1b5	1.13953	-0.752205	0.773288	-0.972737	0.330684	NA
ENSMUSG00000000706_Btn1a1	10.6847	-1.72055	0.735094	-2.34059	0.0192534	0.0779479
ENSMUSG00000000708_Kat2b	114.916	1.03326	0.285998	3.61284	0.000302862	0.0064306
ENSMUSG00000000711_Rab5b	103.66	0.133285	0.297762	0.447623	0.654425	0.757941
ENSMUSG00000000724_Cryba1	1.52575	-0.946596	0.82435	-1.14829	0.250847	NA
ENSMUSG00000000730_Dnmt3l	6.12421	-1.50544	0.800941	-1.87958	0.0601649	0.158964
ENSMUSG00000000731_Aire	7.31299	-2.38849	0.794342	-3.00688	0.00263941	0.0237363
ENSMUSG00000000732_Icosl	17.7733	0.661819	0.549249	1.20495	0.228222	0.374291
ENSMUSG00000000738_Spg7	98.2356	0.557286	0.292458	1.90552	0.0567119	0.152929
ENSMUSG00000000739_Sult5a1	0.838366	-0.302802	0.724632	-0.41787	0.676042	NA
ENSMUSG00000000740_Rpl13	78.4628	0.939434	0.31158	3.01506	0.00256928	0.0233091
ENSMUSG00000000743_Chmp1a	27.1224	0.429911	0.461096	0.932369	0.351146	0.498199
ENSMUSG00000000751_Rpa1	86.5314	0.509423	0.293661	1.73473	0.0827878	0.193811
ENSMUSG00000000753_Serpinf1	7.71462	-0.81695	0.728608	-1.12125	0.262183	0.411082
ENSMUSG00000000759_Tubgcp3	85.8067	0.273053	0.303595	0.899397	0.368441	0.514177
ENSMUSG00000000766_Oprm1	11.8087	-1.94748	0.690978	-2.81843	0.00482586	0.0343816
ENSMUSG00000000776_Polr3d	49.6714	0.595159	0.392889	1.51483	0.129817	0.258334
ENSMUSG00000000782_Tcf7	3.34711	0.0496157	0.832875	0.0595716	0.952497	0.970962
ENSMUSG00000000787_Ddx3x	551.052	0.65497	0.194006	3.37603	0.000735391	0.0109625
ENSMUSG00000000791_Il12rb1	2.98037	-0.760589	0.838861	-0.906693	0.364569	0.51065
ENSMUSG00000000792_Slc5a5	4.16591	-1.91638	0.836433	-2.29113	0.0219558	0.0846968
ENSMUSG00000000794_Kcnn3	40.4408	-1.19223	0.419654	-2.84098	0.00449757	0.032952
ENSMUSG00000000804_Usp32	216.68	0.651388	0.237997	2.73696	0.00620102	0.0398703
ENSMUSG00000000805_Car4	32.5604	0.465269	0.438208	1.06175	0.288348	0.437572
ENSMUSG00000000811_Txnrd3	10.2276	0.687313	0.680296	1.01031	0.312345	0.460851
ENSMUSG00000000817_Fasl	7.23248	-2.90386	0.775547	-3.74428	0.000180912	0.00468973
ENSMUSG00000000823_Zfp512b	59.8774	0.049116	0.3719	0.132068	0.894931	0.932567
ENSMUSG00000000826_Dnajc5	201.634	0.723475	0.235221	3.07572	0.00209993	0.0206619
ENSMUSG00000000827_Tpd52l2	75.6931	0.567034	0.325547	1.74179	0.0815458	0.192164
ENSMUSG00000000838_Fmr1	251.924	0.266991	0.211021	1.26523	0.205789	0.349097
ENSMUSG00000000861_Bcl11a	149.575	0.210422	0.254673	0.826245	0.408665	0.551127
ENSMUSG00000000869_Il4	0.62712	-0.643976	0.655002	-0.983167	0.325525	NA
ENSMUSG00000000876_Pxmp4	16.9715	-0.14292	0.57797	-0.24728	0.804692	0.86921
ENSMUSG00000000881_Dlg3	125.777	0.487031	0.267089	1.82348	0.0682312	0.172088
ENSMUSG00000000884_Gnb1l	8.46065	-1.53924	0.69346	-2.21964	0.0264429	0.0953266
ENSMUSG00000000889_Dbh	3.52389	-0.966768	0.845241	-1.14378	0.252716	0.40153
ENSMUSG00000000901_Mmp11	7.52505	-1.60249	0.743008	-2.15676	0.031024	0.105216
ENSMUSG00000000902_Smarcb1	214.153	-0.36909	0.259162	-1.42416	0.154399	0.28963
ENSMUSG00000000903_Vpreb3	1.11049	-1.02465	0.745431	-1.37458	0.169263	NA
ENSMUSG00000000915_Hip1r	133.546	0.0650038	0.263647	0.246556	0.805252	0.869523
ENSMUSG00000000916_Nsun5	26.617	-0.128646	0.476978	-0.26971	0.787383	0.856698
ENSMUSG00000000934_Top1mt	16.0674	0.615366	0.564578	1.08996	0.275732	0.424565
ENSMUSG00000000938_Hoxa10	4.02565	-1.57993	0.832805	-1.89712	0.0578116	0.15486
ENSMUSG00000000942_Hoxa4	1.65646	0.20797	0.823658	0.252496	0.800658	NA
ENSMUSG00000000948_Gm38393	206.924	0.621896	0.280654	2.21588	0.0266998	0.0958838
ENSMUSG00000000957_Mmp14	33.3085	-0.160025	0.42964	-0.372464	0.709548	0.800211
ENSMUSG00000000958_Slc7a7	2.97566	-0.477287	0.844881	-0.564917	0.57213	0.693351
ENSMUSG00000000959_Oxa1l	37.4484	0.014498	0.414076	0.0350129	0.972069	0.983381
ENSMUSG00000000976_Heatr6	39.8788	0.070781	0.407481	0.173704	0.862098	0.909885
ENSMUSG00000000982_Ccl3	0.441153	0.277164	0.609813	0.454506	0.649464	NA
ENSMUSG00000000983_Wfdc18	0.774172	-0.492939	0.721115	-0.683579	0.494241	NA
ENSMUSG00000001014_Icam4	1.14282	-0.434	0.768919	-0.564429	0.572462	NA
ENSMUSG00000001016_Ilf2	96.6633	0.193271	0.306057	0.631487	0.527722	0.655628
ENSMUSG00000001017_Chtop	98.1199	0.759067	0.290655	2.61158	0.00901255	0.0498276
ENSMUSG00000001018_Snapin	54.5218	1.10939	0.384748	2.88342	0.00393385	0.0306297
ENSMUSG00000001021_S100a3	23.9679	-2.65747	0.574328	-4.6271	3.71e-06	0.000423648
ENSMUSG00000001025_S100a6	7.09467	-0.0338629	0.728156	-0.046505	0.962908	0.97783
ENSMUSG00000001027_Scn4a	17.6844	-2.87505	0.616652	-4.66235	3.13e-06	0.000385105
ENSMUSG00000001029_Icam2	4.88146	-0.519393	0.789808	-0.657619	0.510783	0.641591
ENSMUSG00000001034_Mapk7	34.8758	-0.646872	0.424792	-1.5228	0.12781	0.25551
ENSMUSG00000001036_Epn2	73.6566	0.916319	0.379003	2.41771	0.0156187	0.0687199
ENSMUSG00000001039_B9d1	7.93554	0.0856435	0.703025	0.121821	0.903041	0.938065
ENSMUSG00000001052_Sec24b	112.145	0.533592	0.291544	1.83023	0.0672154	0.170525
ENSMUSG00000001053_N4bp3	40.5873	-0.148451	0.426466	-0.348095	0.727769	0.81222
ENSMUSG00000001054_Rmnd5b	32.9608	0.848427	0.476566	1.78029	0.0750282	0.182641
ENSMUSG00000001056_Nhp2	19.1082	0.394904	0.533134	0.740721	0.458863	0.596214
ENSMUSG00000001062_Vps9d1	37.5289	-0.175025	0.429183	-0.40781	0.683413	0.779892
ENSMUSG00000001065_Zfp276	27.4814	-0.427977	0.452014	-0.946822	0.34373	0.490806
ENSMUSG00000001082_Mfsd10	12.7695	-1.02647	0.618305	-1.66013	0.0968879	0.213789
ENSMUSG00000001089_Luzp1	354.015	0.335274	0.199932	1.67694	0.0935538	0.209294
ENSMUSG00000001095_Slc13a2	6.57244	-2.68019	0.770045	-3.48057	0.000500356	0.00871706
ENSMUSG00000001098_Kctd10	26.9848	0.0946906	0.478001	0.198097	0.842969	0.897399
ENSMUSG00000001100_Poldip2	58.3587	0.656948	0.362669	1.81143	0.0700748	0.17496
ENSMUSG00000001103_Sebox	10.9227	-1.08746	0.662957	-1.64032	0.100939	0.219077
ENSMUSG00000001105_Ift20	56.6231	0.569189	0.359068	1.58518	0.112925	0.235243
ENSMUSG00000001119_Col6a1	16.6777	-0.466546	0.559889	-0.833282	0.404685	0.547994
ENSMUSG00000001120_Pcbp3	41.7452	0.521434	0.416576	1.25171	0.210675	0.354474
ENSMUSG00000001123_Lgals9	3.51391	0.364464	0.822057	0.443356	0.657508	0.760276
ENSMUSG00000001127_Araf	132.682	0.673399	0.250227	2.69116	0.00712048	0.0430412
ENSMUSG00000001128_Cfp	5.10203	0.436805	0.80938	0.539678	0.589419	0.707176
ENSMUSG00000001131_Timp1	0.444137	-0.0452832	0.632731	-0.0715678	0.942946	NA
ENSMUSG00000001134_Uxt	5.7989	1.20208	0.793186	1.51551	0.129643	0.258194
ENSMUSG00000001138_Cnnm3	27.7855	0.554981	0.464769	1.1941	0.232438	0.378727
ENSMUSG00000001143_Lman2l	62.8654	0.207809	0.337216	0.616249	0.53773	0.664583
ENSMUSG00000001150_Mcm3ap	78.9078	0.395068	0.312876	1.2627	0.206698	0.350064
ENSMUSG00000001151_Pcnt	215.65	0.218176	0.22267	0.979815	0.327177	0.475053
ENSMUSG00000001155_Ftcd	5.25398	-2.18427	0.810138	-2.69617	0.00701426	0.0426915
ENSMUSG00000001156_Mxd1	60.5496	-0.197796	0.330845	-0.597852	0.549939	0.674691
ENSMUSG00000001157_Gmcl1	54.1852	-0.301566	0.375153	-0.803848	0.421485	0.562277
ENSMUSG00000001158_Snrnp27	155.745	-0.115664	0.308993	-0.374327	0.708161	0.799259
ENSMUSG00000001166_Oas1c	1.30886	-1.18943	0.77281	-1.5391	0.123781	NA
ENSMUSG00000001168_Oas1h	1.5088	-1.3369	0.79226	-1.68746	0.0915155	NA
ENSMUSG00000001173_Ocrl	166.741	0.333526	0.25832	1.29113	0.196657	0.338997
ENSMUSG00000001175_Calm1	3008.94	0.810719	0.158923	5.10132	3.37e-07	0.000106203
ENSMUSG00000001211_Agpat3	254.963	0.751728	0.215627	3.48624	0.000489868	0.00857865
ENSMUSG00000001225_Slc26a3	6.58873	-1.78844	0.783167	-2.2836	0.022395	0.0858906
ENSMUSG00000001227_Sema6b	31.5546	0.401474	0.45579	0.880831	0.378409	0.523644
ENSMUSG00000001228_Uhrf1	4.15524	-0.707468	0.832652	-0.849656	0.395516	0.538968
ENSMUSG00000001229_Dpp9	31.0121	0.470538	0.460883	1.02095	0.307278	0.456116
ENSMUSG00000001240_Ramp2	28.528	-0.237521	0.468784	-0.506675	0.612383	0.725201
ENSMUSG00000001247_Lsr	11.1937	-0.54668	0.684991	-0.798083	0.424822	0.565502
ENSMUSG00000001248_Gramd1a	68.69	0.0655159	0.327602	0.199987	0.841491	0.896327
ENSMUSG00000001249_Hpn	6.16394	-2.17048	0.783602	-2.76987	0.0056078	0.0377543
ENSMUSG00000001260_Gabrg1	57.4108	0.611584	0.342046	1.78802	0.0737733	0.180614
ENSMUSG00000001270_Ckb	1240.05	0.884311	0.17743	4.984	6.23e-07	0.00014975
ENSMUSG00000001280_Sp1	111.851	-0.489879	0.269905	-1.815	0.0695238	0.174013
ENSMUSG00000001281_Itgb7	2.19547	0.568805	0.848439	0.670414	0.502594	0.634578
ENSMUSG00000001285_Myg1	26.8637	0.996098	0.507112	1.96425	0.0495007	0.140736
ENSMUSG00000001288_Rarg	12.1102	-0.163482	0.658721	-0.24818	0.803995	0.868747
ENSMUSG00000001289_Pfdn5	90.512	0.554966	0.306139	1.81279	0.069864	0.174552
ENSMUSG00000001300_Efnb2	114.063	0.312856	0.281511	1.11134	0.266421	0.415075
ENSMUSG00000001305_Rrp15	30.5846	-0.104186	0.437385	-0.238202	0.811725	0.874667
ENSMUSG00000001313_Rnd2	61.2914	0.271949	0.353869	0.768501	0.44219	0.581425
ENSMUSG00000001323_Srr	88.0548	0.39248	0.309612	1.26765	0.204923	0.348314
ENSMUSG00000001333_Sync	7.91427	-2.79993	0.75994	-3.68441	0.000229234	0.00541006
ENSMUSG00000001334_Fndc5	173.625	0.648105	0.230094	2.81669	0.00485209	0.0345018
ENSMUSG00000001348_Acp5	2.81704	-1.338	0.845497	-1.5825	0.113536	0.236154
ENSMUSG00000001349_Cnn1	2.16826	-1.13584	0.841635	-1.34956	0.177157	0.316432
ENSMUSG00000001366_Fbxo9	62.003	0.800006	0.331336	2.41449	0.0157574	0.0690263
ENSMUSG00000001376_Vps50	97.5926	0.451678	0.311168	1.45156	0.146625	0.279882
ENSMUSG00000001380_Hars	84.5189	0.812459	0.298821	2.71888	0.00655033	0.0409697
ENSMUSG00000001383_Zmat2	273.375	0.302298	0.201392	1.50104	0.133344	0.26279
ENSMUSG00000001403_Ube2c	8.96856	-1.74458	0.780091	-2.23638	0.0253266	0.0929369
ENSMUSG00000001415_Smg5	102.592	0.174234	0.279418	0.623562	0.532915	0.660163
ENSMUSG00000001416_Cct3	111.757	0.637419	0.279466	2.28085	0.0225573	0.0861423
ENSMUSG00000001418_Glmp	51.6385	-0.614458	0.369081	-1.66483	0.095946	0.212734
ENSMUSG00000001419_Mef2d	162.356	0.526956	0.251764	2.09306	0.0363441	0.115705
ENSMUSG00000001420_Tmem79	4.17173	-1.44863	0.832678	-1.73973	0.0819068	0.192641
ENSMUSG00000001424_Snd1	72.3899	0.349343	0.323687	1.07926	0.280472	0.430197
ENSMUSG00000001435_Col18a1	313.533	0.425039	0.236122	1.80008	0.0718476	0.177702
ENSMUSG00000001436_Slc19a1	15.4763	-0.32545	0.574749	-0.566248	0.571225	0.692834
ENSMUSG00000001440_Kpnb1	220.553	0.581337	0.223226	2.60425	0.00920745	0.0504943
ENSMUSG00000001441_Npepps	194.071	0.614759	0.22957	2.67787	0.00740927	0.0442414
ENSMUSG00000001444_Tbx21	6.30671	-2.73015	0.810289	-3.36935	0.00075345	0.0111307
ENSMUSG00000001445_Mrpl10	23.3491	0.310823	0.51755	0.600566	0.548129	0.673175
ENSMUSG00000001467_Cyp51	70.5383	0.588136	0.358038	1.64266	0.100453	0.218279
ENSMUSG00000001472_Tcf25	423.43	0.593403	0.180789	3.28231	0.00102962	0.0134601
ENSMUSG00000001473_Tubb6	3.8523	-0.460691	0.815321	-0.565042	0.572045	0.69328
ENSMUSG00000001482_Def8	65.7871	0.891738	0.351731	2.53529	0.0112356	0.056471
ENSMUSG00000001493_Meox1	4.1846	-1.17599	0.827434	-1.42125	0.155244	0.290483
ENSMUSG00000001494_Sost	7.61888	-2.25357	0.77587	-2.90457	0.00367762	0.0293154
ENSMUSG00000001496_Nkx2-1	6.25793	-0.89053	0.822511	-1.0827	0.278943	0.42828
ENSMUSG00000001497_Pax9	16.6939	-2.34036	0.595696	-3.92879	8.54e-05	0.00307005
ENSMUSG00000001504_Irx2	8.9639	-0.60753	0.679438	-0.894165	0.371233	0.516775
ENSMUSG00000001506_Col1a1	11.0434	-1.34596	0.662015	-2.03313	0.0420393	0.126919
ENSMUSG00000001507_Itga3	60.4491	0.4227	0.381222	1.1088	0.267515	0.416081
ENSMUSG00000001508_Sgca	2.85156	-1.5541	0.849098	-1.83029	0.0672062	0.170518
ENSMUSG00000001510_Dlx3	10.0993	-1.29077	0.707915	-1.82333	0.0682528	0.172108
ENSMUSG00000001517_Foxm1	18.5118	-2.27178	0.615109	-3.6933	0.000221366	0.00527526
ENSMUSG00000001518_Itfg2	48.495	0.071924	0.366855	0.196056	0.844567	0.898429
ENSMUSG00000001520_Nrip2	28.6018	-0.396089	0.45074	-0.878752	0.379536	0.524488
ENSMUSG00000001521_Tulp3	79.5688	0.0584727	0.299107	0.195491	0.845009	0.898644
ENSMUSG00000001524_Gtf2h4	22.1191	-0.264891	0.500333	-0.52943	0.596507	0.712563
ENSMUSG00000001525_Tubb5	157.754	0.555033	0.247953	2.23847	0.0251907	0.0925966
ENSMUSG00000001542_Ell2	48.6451	0.445019	0.405518	1.09741	0.272463	0.421216
ENSMUSG00000001552_Jup	77.3686	0.505022	0.335545	1.50508	0.132304	0.261733
ENSMUSG00000001555_Fkbp10	9.55222	-0.0218578	0.675921	-0.0323377	0.974203	0.984421
ENSMUSG00000001558_Klhl10	2.0777	-0.528576	0.84539	-0.625245	0.53181	0.659279
ENSMUSG00000001566_Mnx1	2.86522	-1.44411	0.848086	-1.70279	0.088608	0.202082
ENSMUSG00000001569_Nom1	102.047	0.0833093	0.268787	0.309945	0.756603	0.83325
ENSMUSG00000001576_Ergic1	120.558	0.495946	0.275675	1.79903	0.0720144	0.177944
ENSMUSG00000001583_Tnk1	1.25597	-0.846176	0.786482	-1.0759	0.281972	NA
ENSMUSG00000001588_Acap1	20.068	-2.61424	0.587312	-4.4512	8.54e-06	0.000743896
ENSMUSG00000001604_Tcea3	0.244279	0.139894	0.605779	0.230932	0.817367	NA
ENSMUSG00000001622_Csn3	7.7801	-1.55425	0.776977	-2.00038	0.0454592	0.133492
ENSMUSG00000001627_Ifrd1	66.9617	0.0280946	0.338676	0.0829543	0.933888	0.958387
ENSMUSG00000001630_Stk38l	58.3213	0.666936	0.362073	1.84199	0.0654761	0.16799
ENSMUSG00000001632_Brpf1	122.425	0.253849	0.271562	0.934772	0.349906	0.496986
ENSMUSG00000001642_Akr1b3	35.396	-0.437688	0.50093	-0.873751	0.382254	0.526875
ENSMUSG00000001655_Hoxc13	3.32598	-2.19077	0.845949	-2.58972	0.0096055	0.0516999
ENSMUSG00000001656_Hoxc11	9.16355	-1.64228	0.746807	-2.19906	0.0278733	0.0985354
ENSMUSG00000001657_Hoxc8	10.9408	-1.82246	0.757326	-2.40644	0.0161088	0.069866
ENSMUSG00000001661_Hoxc6	11.7614	-1.85657	0.697384	-2.66219	0.00776339	0.0455656
ENSMUSG00000001663_Gstt1	12.4606	-0.440504	0.637328	-0.691173	0.489457	0.622679
ENSMUSG00000001665_Gstt3	17.5788	-2.47452	0.678479	-3.64716	0.000265158	0.00593251
ENSMUSG00000001666_Ddt	67.2566	0.456354	0.408163	1.11807	0.263538	0.41238
ENSMUSG00000001670_Tat	1.57629	-1.00464	0.833796	-1.2049	0.228242	NA
ENSMUSG00000001672_Marveld3	6.74403	-1.70244	0.767381	-2.21851	0.0265202	0.0954718
ENSMUSG00000001674_Ddx18	28.3334	0.671098	0.496986	1.35034	0.176908	0.316178
ENSMUSG00000001687_Ubl3	545.644	0.501128	0.185587	2.70023	0.00692924	0.0423479
ENSMUSG00000001700_Gramd3	29.5775	0.451392	0.464529	0.971719	0.331191	0.478646
ENSMUSG00000001707_Eef1e1	13.83	0.561756	0.62191	0.903275	0.36638	0.512186
ENSMUSG00000001729_Akt1	61.3205	0.807402	0.367765	2.19543	0.0281326	0.099152
ENSMUSG00000001739_Cldn15	2.45498	-1.03044	0.847561	-1.21577	0.224074	0.369649
ENSMUSG00000001741_Il16	154.099	0.601726	0.263978	2.27945	0.0226403	0.0862801
ENSMUSG00000001750_Tcirg1	6.42628	-0.60458	0.73571	-0.821764	0.411211	0.553548
ENSMUSG00000001751_Naglu	8.5732	-0.902063	0.720918	-1.25127	0.210836	0.354628
ENSMUSG00000001755_Coasy	14.195	-0.274198	0.620838	-0.441658	0.658737	0.761219
ENSMUSG00000001761_Smo	48.9608	-0.0301939	0.370626	-0.0814673	0.93507	0.95899
ENSMUSG00000001763_Tspan33	23.8275	0.13617	0.489717	0.278058	0.780968	0.851656
ENSMUSG00000001767_Crnkl1	103.199	0.43369	0.274719	1.57867	0.114412	0.237346
ENSMUSG00000001768_Rin2	26.3988	0.114148	0.486381	0.234688	0.814451	0.876837
ENSMUSG00000001773_Folh1	33.8415	0.580566	0.463698	1.25204	0.210557	0.354322
ENSMUSG00000001774_Chordc1	126.275	0.513143	0.265616	1.9319	0.0533721	0.147523
ENSMUSG00000001783_Rtcb	160.957	0.378286	0.234543	1.61286	0.106774	0.227196
ENSMUSG00000001785_Pwp1	30.0884	1.19909	0.467619	2.56424	0.0103403	0.0540773
ENSMUSG00000001786_Fbxo7	52.666	-0.126356	0.348674	-0.362389	0.717061	0.804948
ENSMUSG00000001794_Capns1	87.9117	0.27691	0.296009	0.935477	0.349542	0.496579
ENSMUSG00000001802_Lrp3	35.4169	0.448568	0.435457	1.03011	0.30296	0.451884
ENSMUSG00000001804_Dsg4	8.19685	-1.62011	0.779345	-2.07881	0.0376347	0.118167
ENSMUSG00000001815_Evx2	3.88358	-1.41101	0.843126	-1.67355	0.0942193	0.210221
ENSMUSG00000001819_Hoxd13	4.46537	-0.796494	0.81544	-0.976765	0.328685	0.476519
ENSMUSG00000001823_Hoxd12	3.57239	-1.31761	0.838546	-1.57131	0.116111	0.239543
ENSMUSG00000001827_Folr1	4.11893	-1.27049	0.821631	-1.54631	0.122031	0.247678
ENSMUSG00000001829_Clpb	55.8306	0.381603	0.356672	1.0699	0.284666	0.434179
ENSMUSG00000001833_Sept7	1765.28	0.267875	0.177364	1.51031	0.130964	0.259911
ENSMUSG00000001844_Zdhhc4	22.1897	-0.134401	0.493086	-0.272571	0.785183	0.855061
ENSMUSG00000001847_Rac1	306.764	0.908899	0.223525	4.0662	4.78e-05	0.00214569
ENSMUSG00000001855_Nup214	80.9656	-0.26412	0.323262	-0.817044	0.413903	0.555868
ENSMUSG00000001864_Aif1l	16.8288	-0.957049	0.563636	-1.69799	0.0895092	0.203436
ENSMUSG00000001865_Cpa3	2.0813	-1.68949	0.824164	-2.04994	0.0403703	0.123644
ENSMUSG00000001870_Ltbp1	40.064	-1.125	0.442016	-2.54516	0.0109228	0.0557643
ENSMUSG00000001891_Ugp2	76.116	0.850981	0.322396	2.63955	0.00830157	0.0472899
ENSMUSG00000001901_Kcnh6	5.9981	-1.46796	0.774936	-1.89429	0.0581863	0.155519
ENSMUSG00000001909_Trmt1	37.8465	-0.000377031	0.418456	-0.000901004	0.999281	0.999436
ENSMUSG00000001910_Nacc1	164.021	0.711655	0.251916	2.82497	0.00472848	0.0340543
ENSMUSG00000001911_Nfix	269.914	0.440314	0.237413	1.85463	0.0636492	0.164946
ENSMUSG00000001918_Slc1a5	11.6042	-2.54578	0.660495	-3.85435	0.000116037	0.00366254
ENSMUSG00000001924_Uba1	287.156	1.02907	0.203627	5.05369	4.33e-07	0.000119032
ENSMUSG00000001930_Vwf	31.6262	-1.95622	0.583838	-3.35062	0.000806307	0.0116432
ENSMUSG00000001942_Siae	15.2595	-0.187377	0.587934	-0.318704	0.749951	0.828151
ENSMUSG00000001943_Vsig2	0.65443	-0.667739	0.661464	-1.00949	0.312741	NA
ENSMUSG00000001946_Esam	9.56428	-0.676926	0.67635	-1.00085	0.316898	0.46506
ENSMUSG00000001948_Spa17	4.48753	0.36514	0.805674	0.453211	0.650397	0.755029
ENSMUSG00000001962_Fam50a	50.9083	-0.280174	0.354241	-0.790911	0.428996	0.569268
ENSMUSG00000001964_Emd	22.2191	0.00403119	0.534406	0.00754332	0.993981	0.99625
ENSMUSG00000001983_Taco1	21.1616	0.584376	0.508094	1.15014	0.250088	0.398754
ENSMUSG00000001985_Grik3	122.621	-0.00633499	0.252387	-0.0251004	0.979975	0.987867
ENSMUSG00000001986_Gria3	630.144	0.660843	0.209537	3.15383	0.00161145	0.0176372
ENSMUSG00000001988_Npas1	0.881677	-0.855501	0.709776	-1.20531	0.228083	NA
ENSMUSG00000001995_Sipa1l2	54.0193	-0.0692533	0.364261	-0.19012	0.849215	0.901558
ENSMUSG00000001998_Ap4e1	39.9144	0.156284	0.430472	0.363053	0.716565	0.804758
ENSMUSG00000001999_Blvra	19.4098	0.963218	0.540973	1.78053	0.0749894	0.182604
ENSMUSG00000002006_Pdzd4	56.978	0.5038	0.346368	1.45452	0.145802	0.278818
ENSMUSG00000002007_Srpk3	4.01276	-0.609714	0.834148	-0.730942	0.464815	0.601707
ENSMUSG00000002010_Idh3g	96.4811	1.00563	0.292686	3.43586	0.000590674	0.00966975
ENSMUSG00000002012_Pnck	6.37478	1.4497	0.777064	1.86561	0.0620958	0.162355
ENSMUSG00000002014_Ssr4	34.4709	0.0923829	0.463058	0.199506	0.841867	0.896489
ENSMUSG00000002015_Bcap31	48.8471	0.612536	0.384104	1.59472	0.110776	0.232247
ENSMUSG00000002017_Fam98a	56.8254	-0.0774219	0.365412	-0.211876	0.832204	0.889791
ENSMUSG00000002020_Ltbp2	19.5654	-0.417554	0.544004	-0.767557	0.44275	0.581749
ENSMUSG00000002028_Kmt2a	513.54	0.387832	0.192663	2.01301	0.0441139	0.130947
ENSMUSG00000002031_Ift46	64.0092	0.147627	0.335213	0.440398	0.659649	0.761932
ENSMUSG00000002032_Tmem25	63.4478	0.23045	0.326236	0.70639	0.479945	0.614943
ENSMUSG00000002033_Cd3g	0.537985	-0.470718	0.626119	-0.751802	0.45217	NA
ENSMUSG00000002043_Trappc6a	4.97004	0.158901	0.817055	0.19448	0.8458	0.899181
ENSMUSG00000002052_Supt6	627.722	0.349232	0.194573	1.79486	0.0726756	0.179064
ENSMUSG00000002055_Spag5	114.112	0.592876	0.284238	2.08584	0.0369929	0.11692
ENSMUSG00000002057_Foxn1	8.58742	-2.53616	0.739576	-3.42921	0.000605336	0.00980653
ENSMUSG00000002058_Unc119	15.4587	-0.857464	0.610285	-1.40502	0.160015	0.296563
ENSMUSG00000002059_Rab34	19.7135	-0.378029	0.541638	-0.697936	0.485217	0.619086
ENSMUSG00000002064_Sdf2	27.856	0.759068	0.468273	1.62099	0.105019	0.224628
ENSMUSG00000002068_Ccne1	19.7893	0.140369	0.521923	0.268947	0.787971	0.857265
ENSMUSG00000002076_Hsf2bp	5.49982	-1.93898	0.783853	-2.47365	0.0133739	0.0628621
ENSMUSG00000002083_Bbc3	1.86369	-0.672821	0.845576	-0.795695	0.426209	NA
ENSMUSG00000002100_Mybpc3	25.1156	0.320978	0.501014	0.640657	0.521746	0.650645
ENSMUSG00000002102_Psmc3	208.022	0.556015	0.229053	2.42745	0.0152054	0.0674852
ENSMUSG00000002103_Acp2	111.448	0.398328	0.261289	1.52447	0.127391	0.254969
ENSMUSG00000002105_Slc39a13	44.8992	-0.284233	0.388795	-0.73106	0.464742	0.601674
ENSMUSG00000002107_Celf2	468.575	0.504105	0.200697	2.51177	0.0120128	0.0588027
ENSMUSG00000002108_Nr1h3	5.95512	-0.070028	0.74571	-0.0939078	0.925182	0.9529
ENSMUSG00000002109_Ddb2	11.3452	0.435775	0.639078	0.681881	0.495314	0.627966
ENSMUSG00000002111_Spi1	4.26416	-1.51715	0.828465	-1.83128	0.0670584	0.170338
ENSMUSG00000002129_Sf3a1	167.26	0.473814	0.235581	2.01125	0.0442986	0.131284
ENSMUSG00000002147_Stat6	7.57033	0.411891	0.72315	0.569579	0.568964	0.690627
ENSMUSG00000002190_Clgn	23.554	-0.138381	0.507109	-0.272883	0.784943	0.854872
ENSMUSG00000002204_Napsa	2.9295	-1.06619	0.844669	-1.26226	0.206856	0.350217
ENSMUSG00000002205_Vrk3	33.9273	-0.923782	0.424889	-2.17417	0.0296921	0.102242
ENSMUSG00000002210_Smg9	39.6165	-0.619583	0.414853	-1.4935	0.135306	0.265501
ENSMUSG00000002221_Paxip1	65.7334	-0.436528	0.334127	-1.30647	0.191392	0.333056
ENSMUSG00000002222_Rmnd5a	227.981	0.996904	0.287954	3.46202	0.000536132	0.00913689
ENSMUSG00000002227_Mov10	12.3158	-1.46138	0.642887	-2.27314	0.0230176	0.0872288
ENSMUSG00000002228_Ppm1j	7.44516	-1.48396	0.772031	-1.92215	0.0545871	0.149448
ENSMUSG00000002233_Rhoc	17.9162	-0.581634	0.554331	-1.04925	0.294061	0.443375
ENSMUSG00000002240_Prr27	4.72432	-0.533092	0.82536	-0.645891	0.51835	0.648227
ENSMUSG00000002249_Tead3	4.35034	-0.573722	0.794911	-0.721744	0.470452	0.606724
ENSMUSG00000002250_Ppard	44.2628	0.29485	0.386289	0.763288	0.445292	0.58416
ENSMUSG00000002257_Def6	2.80987	-0.560594	0.843599	-0.664526	0.506354	0.637785
ENSMUSG00000002265_Peg3	1509.43	0.313071	0.15768	1.98549	0.0470903	0.136303
ENSMUSG00000002266_Zim1	34.6582	-0.859235	0.445537	-1.92854	0.0537882	0.148312
ENSMUSG00000002274_Metrn	49.1115	0.461737	0.375842	1.22854	0.219243	0.364357
ENSMUSG00000002279_Lmf1	50.9444	-1.30529	0.368164	-3.54539	0.000392025	0.00747701
ENSMUSG00000002280_Narfl	30.112	-0.431063	0.440874	-0.977746	0.3282	0.476083
ENSMUSG00000002289_Angptl4	9.21888	-1.12201	0.684455	-1.63928	0.101155	0.219288
ENSMUSG00000002297_Dbf4	14.5383	-1.3469	0.621044	-2.16876	0.0301008	0.103142
ENSMUSG00000002307_Daxx	36.0161	-0.505216	0.432275	-1.16874	0.242509	0.390528
ENSMUSG00000002308_Cd320	15.1397	-0.780505	0.603234	-1.29387	0.195711	0.337884
ENSMUSG00000002319_Ipo4	54.715	0.764359	0.369138	2.07066	0.0383905	0.119812
ENSMUSG00000002320_Tm9sf1	57.8127	-0.24948	0.358537	-0.695829	0.486536	0.620339
ENSMUSG00000002324_Rec8	5.63314	-1.46986	0.795481	-1.84776	0.0646372	0.16677
ENSMUSG00000002325_Irf9	20.6506	-0.740409	0.506877	-1.46073	0.14409	0.276579
ENSMUSG00000002326_Gmpr2	17.1824	-0.259647	0.576054	-0.450734	0.652181	0.756522
ENSMUSG00000002329_Mdp1	26.7951	0.339911	0.472418	0.719514	0.471824	0.607886
ENSMUSG00000002332_Dhrs1	50.4099	0.0118825	0.370126	0.0321039	0.974389	0.984494
ENSMUSG00000002341_Ncan	31.12	-0.203725	0.442639	-0.46025	0.645337	0.751046
ENSMUSG00000002342_Tmem161a	26.7605	-0.552553	0.510569	-1.08223	0.27915	0.428525
ENSMUSG00000002343_Armc6	12.6369	-0.598033	0.637768	-0.937697	0.3484	0.495393
ENSMUSG00000002345_Borcs8	19.0904	0.90526	0.54588	1.65835	0.0972472	0.214326
ENSMUSG00000002346_Slc25a42	34.6971	-0.178687	0.477387	-0.374302	0.70818	0.799259
ENSMUSG00000002365_Snx9	32.8252	0.698785	0.447153	1.56274	0.118113	0.242259
ENSMUSG00000002372_Ranbp3	44.0635	0.141291	0.382328	0.369555	0.711714	0.801422
ENSMUSG00000002379_Ndufa11	65.1168	0.519598	0.350629	1.4819	0.138366	0.269456
ENSMUSG00000002384_Bmp8b	3.68491	-1.43833	0.848373	-1.6954	0.0900003	0.204157
ENSMUSG00000002393_Nr2f6	17.5461	1.0865	0.582225	1.86611	0.0620258	0.162254
ENSMUSG00000002395_Use1	42.3493	0.0357659	0.399689	0.0894842	0.928697	0.955241
ENSMUSG00000002396_Ocel1	31.9981	-1.01443	0.472938	-2.14496	0.0319559	0.10708
ENSMUSG00000002409_Dyrk1b	21.4638	0.71742	0.516681	1.38852	0.164979	0.302208
ENSMUSG00000002413_Braf	325.656	0.511597	0.205851	2.48528	0.0129449	0.0616308
ENSMUSG00000002416_Ndufb2	74.466	0.232216	0.315937	0.735007	0.462335	0.599519
ENSMUSG00000002428_Hltf	98.3594	0.614711	0.28141	2.1844	0.028933	0.100807
ENSMUSG00000002455_Prpf6	146.66	0.442595	0.244563	1.80973	0.0703369	0.175445
ENSMUSG00000002458_Rgs19	7.49343	0.0648425	0.723268	0.089652	0.928564	0.955201
ENSMUSG00000002459_Rgs20	24.6467	0.97468	0.493777	1.97393	0.04839	0.138928
ENSMUSG00000002475_Abhd3	171.758	0.590728	0.266131	2.21969	0.0264401	0.0953266
ENSMUSG00000002477_Snrpd1	68.4197	0.603031	0.336352	1.79286	0.072996	0.179494
ENSMUSG00000002486_Tchp	70.0433	-0.465852	0.342216	-1.36128	0.173424	0.31227
ENSMUSG00000002489_Tiam1	270.734	0.461562	0.232475	1.98543	0.0470967	0.136306
ENSMUSG00000002496_Tsc2	103.616	0.797355	0.303876	2.62395	0.00869174	0.0486577
ENSMUSG00000002504_Slc9a3r2	40.7977	0.783896	0.396242	1.97833	0.047892	0.137838
ENSMUSG00000002524_Puf60	158.777	0.609448	0.267904	2.27488	0.0229133	0.0870383
ENSMUSG00000002546_Golga2	226.534	0.16104	0.236557	0.680766	0.49602	0.628555
ENSMUSG00000002550_Uck1	31.6735	-0.0185305	0.433593	-0.0427371	0.965911	0.979633
ENSMUSG00000002565_Scin	14.6546	-1.32701	0.596702	-2.22391	0.0261545	0.0948032
ENSMUSG00000002578_Ikzf4	31.1081	-0.972838	0.488772	-1.99037	0.0465502	0.135414
ENSMUSG00000002580_Mien1	19.1677	0.855318	0.55365	1.54487	0.122378	0.248181
ENSMUSG00000002588_Pon1	2.14251	-1.15187	0.843262	-1.36596	0.17195	0.310743
ENSMUSG00000002602_Axl	54.9634	0.841732	0.360332	2.33599	0.0194916	0.0784822
ENSMUSG00000002603_Tgfb1	12.1755	-0.936222	0.701092	-1.33538	0.181753	0.321852
ENSMUSG00000002608_Ccdc97	50.0157	0.0573971	0.364803	0.157337	0.874979	0.919308
ENSMUSG00000002617_Zfp40	43.0972	-0.112378	0.481219	-0.233529	0.815351	0.877513
ENSMUSG00000002625_Akap8l	160.199	0.186642	0.235276	0.793291	0.427608	0.568098
ENSMUSG00000002633_Shh	26.2054	0.483035	0.487439	0.990966	0.321702	0.469825
ENSMUSG00000002635_Pdcd2l	12.2154	-0.0523504	0.63764	-0.0821003	0.934567	0.958834
ENSMUSG00000002658_Gtf2f1	121.359	0.289799	0.289884	0.999709	0.317451	0.465486
ENSMUSG00000002660_Clpp	27.9213	1.01173	0.470992	2.14809	0.0317064	0.106844
ENSMUSG00000002661_Alkbh7	18.2459	0.303155	0.579746	0.522909	0.601037	0.716378
ENSMUSG00000002664_Pspn	1.50941	0.110933	0.798494	0.138927	0.889507	NA
ENSMUSG00000002668_Dennd1c	1.24005	-0.361223	0.799479	-0.451824	0.651396	NA
ENSMUSG00000002679_Med6	19.1555	1.78796	0.595005	3.00495	0.00265623	0.0238377
ENSMUSG00000002688_Prkd1	18.4561	0.189997	0.535217	0.35499	0.722597	0.808631
ENSMUSG00000002699_Lcp2	7.82619	-1.69474	0.75415	-2.24722	0.0246258	0.0911952
ENSMUSG00000002718_Cse1l	108.449	0.900885	0.289703	3.10969	0.00187286	0.0192805
ENSMUSG00000002728_Naa20	58.8342	0.682704	0.371976	1.83535	0.0664544	0.169477
ENSMUSG00000002731_Prkra	16.7368	0.328353	0.558116	0.588324	0.556315	0.679832
ENSMUSG00000002732_Fkbp7	8.2746	-1.24476	0.733043	-1.69807	0.089494	0.203436
ENSMUSG00000002733_Plekha3	51.4957	1.09316	0.37866	2.88692	0.0038903	0.0304467
ENSMUSG00000002741_Ykt6	46.8362	0.373855	0.378204	0.9885	0.322908	0.471025
ENSMUSG00000002748_Baz1b	626.667	0.291618	0.16155	1.80512	0.0710558	0.176488
ENSMUSG00000002763_Pex6	24.4153	0.748351	0.488977	1.53044	0.125907	0.253039
ENSMUSG00000002767_Mrpl2	16.2242	0.43273	0.588187	0.7357	0.461913	0.599063
ENSMUSG00000002768_Mea1	43.069	0.218533	0.38869	0.562229	0.57396	0.695079
ENSMUSG00000002769_Gnmt	1.80859	-0.787748	0.842719	-0.934769	0.349907	NA
ENSMUSG00000002771_Grin2d	14.6184	-0.123001	0.5899	-0.208511	0.83483	0.891565
ENSMUSG00000002778_Kdelr1	19.1868	0.697587	0.54757	1.27397	0.202674	0.345721
ENSMUSG00000002781_Tmem143	14.7992	-0.299793	0.588445	-0.509467	0.610425	0.723556
ENSMUSG00000002791_Pdxk-ps	5.09473	-1.13431	0.780838	-1.45268	0.146313	0.279496
ENSMUSG00000002797_Ggct	48.298	0.114024	0.373726	0.3051	0.76029	0.835956
ENSMUSG00000002799_Jag2	9.90149	-0.330486	0.690569	-0.478571	0.632244	0.740784
ENSMUSG00000002803_Btbd6	19.0128	-0.107882	0.527503	-0.204515	0.837951	0.893679
ENSMUSG00000002804_Nudt14	3.33427	1.41671	0.844759	1.67706	0.0935307	0.209261
ENSMUSG00000002808_Epdr1	77.4549	0.644158	0.343585	1.87482	0.0608181	0.159991
ENSMUSG00000002812_Flii	112.427	0.605569	0.279007	2.17044	0.0299732	0.102855
ENSMUSG00000002814_Top3a	15.5432	-0.206504	0.571176	-0.361541	0.717695	0.805414
ENSMUSG00000002820_Atg4d	17.0308	0.692288	0.589896	1.17358	0.240565	0.388244
ENSMUSG00000002825_Qtrt1	2.31093	-0.0828946	0.84896	-0.0976425	0.922216	0.950793
ENSMUSG00000002831_Plin4	12.8441	-0.404458	0.627284	-0.644777	0.519071	0.648814
ENSMUSG00000002833_Hdgfrp2	107.906	0.292163	0.290818	1.00463	0.315077	0.463531
ENSMUSG00000002835_Chaf1a	10.79	-1.29624	0.723307	-1.7921	0.0731165	0.179704
ENSMUSG00000002844_Adprh	50.8378	0.889997	0.381973	2.33	0.0198061	0.0793194
ENSMUSG00000002845_Tmem39a	13.2514	-0.49726	0.612122	-0.812354	0.416589	0.558284
ENSMUSG00000002846_Timmdc1	34.1522	0.567426	0.437843	1.29596	0.19499	0.337075
ENSMUSG00000002847_Pla1a	0.62712	-0.643976	0.655002	-0.983167	0.325525	NA
ENSMUSG00000002870_Mcm2	17.7618	-1.42673	0.555481	-2.56847	0.0102149	0.0536492
ENSMUSG00000002871_Tpra1	27.1026	-0.216173	0.475333	-0.454782	0.649266	0.754123
ENSMUSG00000002881_Nab1	142.85	0.85429	0.259691	3.28964	0.00100315	0.013289
ENSMUSG00000002885_Adgre5	6.817	-0.0649443	0.740886	-0.0876577	0.930149	0.956108
ENSMUSG00000002897_Il17ra	40.4574	-0.803849	0.387871	-2.07246	0.0382222	0.119503
ENSMUSG00000002900_Lamb1	110.97	0.202178	0.276236	0.731905	0.464227	0.601233
ENSMUSG00000002908_Kcnn1	15.5746	-1.04618	0.607087	-1.72329	0.0848366	0.196668
ENSMUSG00000002910_Arrdc2	5.53994	-0.402765	0.810311	-0.49705	0.619154	0.730718
ENSMUSG00000002930_Ppp1r17	862.404	0.761644	0.211845	3.59528	0.000324042	0.00674712
ENSMUSG00000002944_Cd36	1.25016	-0.818731	0.786443	-1.04106	0.297849	NA
ENSMUSG00000002948_Map2k7	109.054	0.246252	0.270278	0.911107	0.362239	0.508407
ENSMUSG00000002949_Timm44	116.269	0.413104	0.261212	1.58149	0.113766	0.236453
ENSMUSG00000002957_Ap2a2	266.935	0.750865	0.21576	3.4801	0.000501231	0.00872054
ENSMUSG00000002963_Pnkp	16.6624	0.0834028	0.589962	0.14137	0.887578	0.927876
ENSMUSG00000002968_Med25	57.5586	-0.0692952	0.34691	-0.19975	0.841676	0.896392
ENSMUSG00000002980_Bcam	3.79393	0.313878	0.814645	0.385294	0.700019	0.793023
ENSMUSG00000002981_Clptm1	119.792	0.718476	0.273883	2.62329	0.00870846	0.0486987
ENSMUSG00000002983_Relb	15.1926	-1.72729	0.60594	-2.85061	0.00436361	0.0323654
ENSMUSG00000002984_Tomm40	59.4897	0.18209	0.35039	0.519679	0.603287	0.717771
ENSMUSG00000002985_Apoe	2110.94	0.850789	0.203523	4.18031	2.91e-05	0.00153706
ENSMUSG00000002992_Apoc2	0.881677	-0.855501	0.709776	-1.20531	0.228083	NA
ENSMUSG00000002996_Hbp1	57.4701	0.773761	0.346551	2.23275	0.0255656	0.093456
ENSMUSG00000002997_Prkar2b	39.8278	0.411213	0.405561	1.01394	0.310613	0.459399
ENSMUSG00000003031_Cdkn1b	118.432	0.78502	0.261454	3.00252	0.00267755	0.0239459
ENSMUSG00000003032_Klf4	15.0208	-1.50591	0.585175	-2.57344	0.0100693	0.0531971
ENSMUSG00000003033_Ap1m1	71.7936	0.59919	0.313897	1.90888	0.056278	0.152327
ENSMUSG00000003037_Rab8a	67.8568	0.187465	0.324134	0.578358	0.563023	0.685272
ENSMUSG00000003038_Hmgn2	74.0924	0.291361	0.318287	0.915404	0.35998	0.506061
ENSMUSG00000003039_Fam32a	154.53	-0.22677	0.298999	-0.758431	0.448193	0.586769
ENSMUSG00000003051_Elf3	2.19635	-0.505263	0.849111	-0.595049	0.551811	0.676186
ENSMUSG00000003053_Cyp2c29	5.31498	-1.13537	0.815487	-1.39226	0.163844	0.30096
ENSMUSG00000003062_Stard3nl	38.2539	-0.240509	0.404184	-0.595048	0.551811	0.676186
ENSMUSG00000003068_Stk11	59.6575	0.404848	0.367103	1.10282	0.270106	0.418927
ENSMUSG00000003070_Efna2	7.46934	-0.386916	0.716655	-0.539892	0.589272	0.707108
ENSMUSG00000003072_Atp5d	91.7928	0.869341	0.350173	2.4826	0.0130427	0.0618683
ENSMUSG00000003099_Ppp5c	83.0291	0.499274	0.29633	1.68486	0.0920155	0.207272
ENSMUSG00000003119_Cdk12	164.708	-0.104701	0.231162	-0.452934	0.650596	0.755192
ENSMUSG00000003123_Lipe	20.3025	-0.563269	0.531057	-1.06066	0.288847	0.437994
ENSMUSG00000003131_Pafah1b2	369.822	0.7684	0.199851	3.84487	0.000120615	0.00372705
ENSMUSG00000003134_Tbc1d8	30.4566	0.177389	0.442035	0.401301	0.688199	0.784313
ENSMUSG00000003135_Cnot11	31.0756	0.208912	0.438495	0.47643	0.633768	0.74191
ENSMUSG00000003153_Slc2a3	180.611	0.438234	0.230246	1.90333	0.0569975	0.15339
ENSMUSG00000003154_Foxj2	76.9903	0.285178	0.330182	0.863701	0.387752	0.532237
ENSMUSG00000003161_Sri	98.7177	0.136988	0.284682	0.481196	0.630377	0.739133
ENSMUSG00000003166_Dgcr2	122.022	0.362771	0.275139	1.3185	0.187337	0.328671
ENSMUSG00000003184_Irf3	27.6031	-0.0449859	0.455153	-0.0988368	0.921268	0.95008
ENSMUSG00000003190_Bcl2l12	3.72003	-0.877845	0.828266	-1.05986	0.289209	0.438441
ENSMUSG00000003198_Zfp959	7.14266	0.494604	0.719835	0.687108	0.492014	0.625194
ENSMUSG00000003199_Mpnd	41.1455	0.0713026	0.408522	0.174538	0.861443	0.909507
ENSMUSG00000003200_Sh3gl1	25.2808	0.637843	0.500424	1.27461	0.202449	0.345429
ENSMUSG00000003206_Ebi3	0.380577	-0.188905	0.604589	-0.312452	0.754697	NA
ENSMUSG00000003208_Ccdc94	11.531	0.349858	0.628508	0.556648	0.577768	0.698477
ENSMUSG00000003226_Ranbp2	654.737	0.683153	0.187053	3.65218	0.00026002	0.00585305
ENSMUSG00000003227_Edar	2.34418	-0.989349	0.846828	-1.1683	0.242686	0.390667
ENSMUSG00000003228_Grk5	41.0864	0.368474	0.391129	0.942079	0.346152	0.493147
ENSMUSG00000003233_Dvl3	93.8467	0.467179	0.287363	1.62575	0.104003	0.223259
ENSMUSG00000003234_Abcf3	75.0459	0.459232	0.312316	1.47041	0.141451	0.273445
ENSMUSG00000003235_Eif2b5	57.1898	0.27259	0.355641	0.766474	0.443395	0.582477
ENSMUSG00000003269_Cyth2	42.2629	-0.193907	0.432536	-0.448302	0.653935	0.757589
ENSMUSG00000003271_Sult2b1	0.821418	-0.445613	0.697537	-0.638838	0.522928	NA
ENSMUSG00000003273_Car11	35.1445	-0.00390353	0.427488	-0.0091313	0.992714	0.995452
ENSMUSG00000003279_Dlgap1	551.024	0.593681	0.174118	3.40965	0.000650456	0.0101877
ENSMUSG00000003282_Plag1	22.4336	-1.17047	0.492792	-2.37518	0.0175405	0.073915
ENSMUSG00000003283_Hck	2.35344	-1.62652	0.848298	-1.9174	0.0551876	0.150416
ENSMUSG00000003299_Mrpl4	13.777	1.16601	0.624849	1.86606	0.0620329	0.162256
ENSMUSG00000003308_Keap1	54.0582	0.0723752	0.351266	0.206041	0.836759	0.892849
ENSMUSG00000003309_Ap1m2	2.54617	-1.86637	0.834321	-2.23699	0.0252871	0.0928486
ENSMUSG00000003316_Glg1	533.405	0.75684	0.18264	4.14389	3.41e-05	0.00169541
ENSMUSG00000003341_Atp8b3	5.81927	-2.55727	0.820092	-3.11827	0.00181913	0.0188779
ENSMUSG00000003344_Btbd2	35.2076	-0.280833	0.419905	-0.668802	0.503622	0.635612
ENSMUSG00000003345_Csnk1g2	44.2217	0.455689	0.409106	1.11387	0.265337	0.414066
ENSMUSG00000003346_Abhd17a	30.858	0.421924	0.447613	0.942609	0.345881	0.492978
ENSMUSG00000003348_Mob3a	6.90407	0.275356	0.763109	0.360835	0.718223	0.805727
ENSMUSG00000003352_Cacnb3	20.7757	1.03882	0.530253	1.9591	0.0501007	0.141897
ENSMUSG00000003354_Ccdc65	3.81235	-0.356631	0.812963	-0.43868	0.660893	0.76296
ENSMUSG00000003355_Fkbp11	2.08367	-1.70011	0.843874	-2.01465	0.0439417	0.130631
ENSMUSG00000003360_Ddx23	163.146	0.37949	0.252579	1.50246	0.132978	0.26257
ENSMUSG00000003363_Pld3	37.7538	1.01174	0.421934	2.39786	0.0164912	0.0709406
ENSMUSG00000003378_Grik5	40.9883	-0.0443841	0.383405	-0.115763	0.90784	0.94121
ENSMUSG00000003379_Cd79a	1.7304	-1.63237	0.820853	-1.98863	0.046742	NA
ENSMUSG00000003380_Rabac1	36.9528	0.764936	0.454044	1.68472	0.0920433	0.207316
ENSMUSG00000003382_Etv3	110.35	-0.221096	0.291895	-0.75745	0.44878	0.587281
ENSMUSG00000003402_Prkcsh	92.683	0.432009	0.304932	1.41674	0.15656	0.292067
ENSMUSG00000003410_Elavl3	287.145	0.437205	0.219694	1.99007	0.0465836	0.135459
ENSMUSG00000003411_Rab3b	6.92705	0.0148633	0.723773	0.0205359	0.983616	0.990109
ENSMUSG00000003418_St8sia6	14.2246	-1.45287	0.699378	-2.07737	0.0377674	0.118454
ENSMUSG00000003420_Fcgrt	13.2951	0.420506	0.602132	0.698361	0.484951	0.61893
ENSMUSG00000003421_Nosip	50.9026	0.41168	0.38435	1.07111	0.284121	0.433717
ENSMUSG00000003423_Pih1d1	2.96759	0.0260855	0.844406	0.0308921	0.975356	0.985085
ENSMUSG00000003429_Rps11	40.6522	0.893552	0.417401	2.14075	0.0322943	0.107758
ENSMUSG00000003435_Supt5	211.96	0.086243	0.247293	0.348748	0.727278	0.812022
ENSMUSG00000003436_Dll3	6.86165	-2.42474	0.795144	-3.04943	0.00229276	0.0217876
ENSMUSG00000003437_Paf1	144.073	0.216466	0.259145	0.835309	0.403544	0.546934
ENSMUSG00000003438_Timm50	13.6665	0.409951	0.59844	0.685032	0.493324	0.626334
ENSMUSG00000003444_Med29	24.3724	0.937252	0.490052	1.91256	0.0558047	0.151602
ENSMUSG00000003452_Bicd1	326.023	0.430191	0.203135	2.11775	0.0341961	0.11131
ENSMUSG00000003458_Ncstn	29.809	0.221213	0.499648	0.442737	0.657956	0.760589
ENSMUSG00000003464_Pex19	64.3896	0.732877	0.342759	2.13817	0.0325029	0.108102
ENSMUSG00000003469_Phyhip	258.44	0.992777	0.212707	4.66735	3.05e-06	0.000384269
ENSMUSG00000003476_Crhr2	7.45715	-1.59602	0.743546	-2.14649	0.0318337	0.106964
ENSMUSG00000003477_Inmt	3.78377	-1.95643	0.841802	-2.3241	0.0201202	0.0800259
ENSMUSG00000003484_Cyp4f18	0.374298	-0.139322	0.605133	-0.230233	0.817911	NA
ENSMUSG00000003500_Impdh1	36.0188	0.454198	0.426206	1.06568	0.28657	0.436053
ENSMUSG00000003505_Psg18	12.9013	-1.76682	0.682696	-2.588	0.00965337	0.0517741
ENSMUSG00000003518_Dusp3	73.6542	0.529639	0.313043	1.6919	0.0906644	0.205195
ENSMUSG00000003526_Prodh	37.333	0.229858	0.406606	0.56531	0.571863	0.693189
ENSMUSG00000003527_Dgcr14	24.4729	0.0764546	0.526536	0.145203	0.884551	0.926133
ENSMUSG00000003528_Slc25a1	15.8728	0.750348	0.607954	1.23422	0.217121	0.361825
ENSMUSG00000003531_Dgcr6	34.6647	0.789581	0.469925	1.68023	0.0929131	0.208487
ENSMUSG00000003534_Ddr1	40.355	0.15395	0.410189	0.375316	0.707425	0.79896
ENSMUSG00000003541_Ier3	7.52004	-0.397916	0.732426	-0.543285	0.586934	0.705315
ENSMUSG00000003545_Fosb	26.352	-2.43755	0.592258	-4.11569	3.86e-05	0.00185943
ENSMUSG00000003546_Klc4	18.2128	0.464633	0.56131	0.827765	0.407804	0.550313
ENSMUSG00000003549_Ercc1	16.4737	-0.344634	0.576938	-0.597351	0.550273	0.674973
ENSMUSG00000003555_Cyp17a1	3.43224	-1.31967	0.842692	-1.56602	0.117344	0.241104
ENSMUSG00000003559_As3mt	7.68329	0.296706	0.741724	0.400023	0.68914	0.785004
ENSMUSG00000003573_Homer3	458.994	0.656905	0.228131	2.8795	0.00398301	0.0308173
ENSMUSG00000003575_Crtc1	86.4757	0.390987	0.32011	1.22141	0.221929	0.367331
ENSMUSG00000003581_Rnf215	18.8406	0.120991	0.531241	0.227751	0.81984	0.880478
ENSMUSG00000003585_Sec14l2	22.6013	-0.0617122	0.525044	-0.117537	0.906434	0.940345
ENSMUSG00000003604_Aven	30.5329	-0.56512	0.463281	-1.21982	0.222532	0.368022
ENSMUSG00000003617_Cp	23.5803	-0.315802	0.499698	-0.631985	0.527396	0.655408
ENSMUSG00000003623_Crot	76.6137	0.107778	0.352279	0.305945	0.759646	0.835391
ENSMUSG00000003644_Rps6ka1	36.4255	0.606562	0.420054	1.44401	0.148736	0.28268
ENSMUSG00000003657_Calb2	78.8708	0.80306	0.339104	2.36818	0.0178757	0.0745851
ENSMUSG00000003660_Snrnp200	322.715	0.662025	0.196443	3.37006	0.000751506	0.0111307
ENSMUSG00000003662_Ciao1	41.918	1.02986	0.421512	2.44326	0.0145553	0.0657115
ENSMUSG00000003665_Has1	7.70789	0.0621522	0.708767	0.0876906	0.930123	0.956108
ENSMUSG00000003680_Taf6l	23.1243	-0.324915	0.499697	-0.650224	0.515548	0.645942
ENSMUSG00000003721_Insig2	55.4829	0.48823	0.35129	1.38982	0.164583	0.301674
ENSMUSG00000003731_Kpna6	145.131	0.383023	0.240199	1.59461	0.1108	0.23226
ENSMUSG00000003746_Man1a	60.0218	0.585694	0.353403	1.6573	0.0974587	0.214554
ENSMUSG00000003752_Itpkc	20.6282	-0.825813	0.541887	-1.52396	0.127519	0.255206
ENSMUSG00000003762_Adck4	31.0318	-0.763657	0.473247	-1.61366	0.106602	0.22687
ENSMUSG00000003778_Brd8	269.888	0.3167	0.21904	1.44586	0.148217	0.282035
ENSMUSG00000003779_Kif20a	0.946347	0.292919	0.744687	0.393346	0.694064	NA
ENSMUSG00000003808_Farsa	39.5532	-0.337115	0.445326	-0.757007	0.449046	0.58748
ENSMUSG00000003809_Gcdh	22.0055	0.714662	0.510332	1.40039	0.161398	0.298121
ENSMUSG00000003810_Mast2	78.7103	0.48353	0.308607	1.56681	0.117158	0.240927
ENSMUSG00000003812_Dnase2a	21.7378	-0.162296	0.503214	-0.322518	0.74706	0.825912
ENSMUSG00000003813_Rad23a	58.4022	0.61053	0.375495	1.62594	0.103963	0.223259
ENSMUSG00000003814_Calr	914.025	0.242424	0.185896	1.30409	0.192205	0.333997
ENSMUSG00000003824_Syce2	6.42181	-0.862111	0.768464	-1.12186	0.26192	0.410805
ENSMUSG00000003847_Nfat5	476.827	0.475003	0.185338	2.5629	0.0103801	0.0541479
ENSMUSG00000003848_Nob1	27.6887	0.226444	0.465251	0.486713	0.626462	0.736348
ENSMUSG00000003849_Nqo1	8.02763	0.533718	0.754998	0.706913	0.47962	0.614679
ENSMUSG00000003863_Ppfia3	86.3865	0.519725	0.311874	1.66646	0.0956221	0.212394
ENSMUSG00000003865_Gys1	25.9847	0.805433	0.495658	1.62498	0.104167	0.223547
ENSMUSG00000003868_Ruvbl2	16.7895	0.85213	0.5904	1.44331	0.148933	0.282979
ENSMUSG00000003872_Lin7b	0.946853	-0.108902	0.791362	-0.137614	0.890546	NA
ENSMUSG00000003873_Bax	10.9687	0.383395	0.643311	0.595972	0.551194	0.675685
ENSMUSG00000003882_Il7r	5.06297	-2.0494	0.827612	-2.47628	0.013276	0.0625791
ENSMUSG00000003923_Tfam	72.8915	-0.00872554	0.308947	-0.0282428	0.977469	0.986524
ENSMUSG00000003929_Zfp81	83.3854	0.812104	0.322059	2.52161	0.0116821	0.0578369
ENSMUSG00000003934_Efnb3	19.5672	-1.55218	0.560784	-2.76787	0.00564238	0.0378392
ENSMUSG00000003948_Mmd	54.2766	0.173911	0.349666	0.497363	0.618933	0.730564
ENSMUSG00000003949_Hlf	161.4	0.66179	0.248021	2.66829	0.00762393	0.0451266
ENSMUSG00000003955_Fam162a	41.7485	0.211433	0.404856	0.522243	0.601501	0.716681
ENSMUSG00000003970_Rpl8	166.44	0.656854	0.227155	2.89166	0.00383211	0.0301626
ENSMUSG00000003974_Grm3	67.2886	0.343486	0.359701	0.954921	0.339618	0.486813
ENSMUSG00000003992_Ssbp2	99.3264	0.210961	0.282306	0.74728	0.454895	0.592992
ENSMUSG00000004018_Fancl	5.5465	-0.0794867	0.771946	-0.102969	0.917987	0.947947
ENSMUSG00000004031_Brinp2	94.3201	0.0865693	0.28175	0.307256	0.758649	0.834703
ENSMUSG00000004032_Gstm5	45.3335	1.02594	0.449747	2.28115	0.0225393	0.0861116
ENSMUSG00000004035_Gstm7	7.41748	-0.353237	0.716102	-0.493278	0.621816	0.732769
ENSMUSG00000004038_Gstm3	1.33947	-0.998976	0.811907	-1.23041	0.218545	NA
ENSMUSG00000004040_Stat3	50.7762	-0.591902	0.364967	-1.6218	0.104847	0.224372
ENSMUSG00000004043_Stat5a	24.8233	-1.73051	0.519001	-3.33431	0.000855108	0.0120448
ENSMUSG00000004044_Ptrf	25.7237	0.0573223	0.507036	0.113054	0.909988	0.942741
ENSMUSG00000004054_Map3k11	12.9314	0.0958767	0.601192	0.159478	0.873293	0.917947
ENSMUSG00000004056_Akt2	148.371	0.709612	0.246022	2.88435	0.00392228	0.0305765
ENSMUSG00000004069_Dnaja3	90.0169	0.511494	0.312248	1.6381	0.1014	0.21969
ENSMUSG00000004070_Hmox2	89.6378	0.75813	0.308774	2.45529	0.0140771	0.0644314
ENSMUSG00000004071_Cdip1	131.679	0.406955	0.267776	1.51976	0.128572	0.256677
ENSMUSG00000004085_Zak	45.5696	-0.778403	0.457892	-1.69997	0.089136	0.202874
ENSMUSG00000004096_Cwc15	141.469	0.454027	0.247069	1.83765	0.0661133	0.168941
ENSMUSG00000004098_Col5a3	28.0047	0.00477488	0.47636	0.0100237	0.992002	0.995008
ENSMUSG00000004099_Dnmt1	114.473	0.490592	0.259899	1.88763	0.0590759	0.157317
ENSMUSG00000004100_Ppan	14.2144	-0.509701	0.614457	-0.829516	0.406813	0.549346
ENSMUSG00000004105_Angptl2	33.1237	-0.63715	0.443554	-1.43647	0.15087	0.285327
ENSMUSG00000004110_Cacna1e	379.642	0.151645	0.1814	0.835969	0.403172	0.546545
ENSMUSG00000004113_Cacna1b	66.5828	0.544114	0.337716	1.61116	0.107145	0.227799
ENSMUSG00000004127_Trmt10a	35.8568	-0.642479	0.439357	-1.46231	0.143655	0.276011
ENSMUSG00000004151_Etv1	214.307	0.828691	0.241989	3.4245	0.000615938	0.00990835
ENSMUSG00000004187_Kifc2	79.8854	0.585596	0.305784	1.91507	0.0554841	0.150985
ENSMUSG00000004207_Psap	682.117	0.846222	0.193646	4.36994	1.24e-05	0.000922067
ENSMUSG00000004221_Ikbkg	64.7143	0.0446409	0.328067	0.136072	0.891764	0.930544
ENSMUSG00000004231_Pax2	27.1366	-1.67834	0.49555	-3.38681	0.000707093	0.0107115
ENSMUSG00000004233_Wars2	44.6396	0.0186797	0.405669	0.0460467	0.963273	0.978085
ENSMUSG00000004263_Atn1	208.821	0.699235	0.26346	2.65404	0.00795336	0.046182
ENSMUSG00000004264_Phb2	34.159	0.472659	0.421663	1.12094	0.262313	0.411162
ENSMUSG00000004266_Ptpn6	1.53061	-0.413922	0.825489	-0.501426	0.616071	NA
ENSMUSG00000004267_Eno2	363.448	0.801472	0.212863	3.76521	0.000166412	0.00450376
ENSMUSG00000004268_Emg1	52.5606	-0.320347	0.350745	-0.913331	0.361068	0.507177
ENSMUSG00000004270_Lpcat3	25.8079	0.209668	0.472878	0.443387	0.657486	0.760276
ENSMUSG00000004285_Atp6v1f	161.466	0.102672	0.277757	0.369648	0.711645	0.801422
ENSMUSG00000004296_Il12b	3.35329	-2.18513	0.846211	-2.58225	0.00981577	0.0522567
ENSMUSG00000004317_Clcn5	36.047	0.418092	0.419817	0.99589	0.319304	0.467458
ENSMUSG00000004319_Clcn3	484.808	0.453113	0.194909	2.32474	0.0200857	0.0799434
ENSMUSG00000004328_Hif3a	43.2533	-0.392304	0.41537	-0.944469	0.34493	0.491949
ENSMUSG00000004344_Gpx5	2.5278	-1.4415	0.848799	-1.69828	0.0894543	0.203383
ENSMUSG00000004347_Pde1c	401.294	0.496111	0.185459	2.67505	0.00747185	0.0444814
ENSMUSG00000004356_Utp20	69.2898	0.491488	0.315321	1.55869	0.119069	0.243562
ENSMUSG00000004359_Spic	7.1244	-2.12807	0.754578	-2.82021	0.00479919	0.0342769
ENSMUSG00000004360_9330159F19Rik	200.213	0.511104	0.213401	2.39504	0.0166184	0.071357
ENSMUSG00000004364_Cul3	374.319	0.748231	0.200482	3.73215	0.00018985	0.0048323
ENSMUSG00000004366_Sst	3.12767	-1.22163	0.84018	-1.45401	0.145942	0.279001
ENSMUSG00000004371_Il11	3.34592	-2.56311	0.84916	-3.0184	0.00254111	0.0231366
ENSMUSG00000004383_Large	255.148	0.63145	0.228487	2.76362	0.00571648	0.0381084
ENSMUSG00000004393_Ddx56	15.9004	-0.349893	0.577395	-0.605985	0.544525	0.670182
ENSMUSG00000004394_Tmed4	73.9043	0.821805	0.332698	2.47012	0.0135068	0.0631881
ENSMUSG00000004415_Col26a1	23.2928	-1.8765	0.846582	-2.21656	0.0266534	0.0957778
ENSMUSG00000004446_Bid	6.98372	-2.06343	0.793266	-2.60119	0.00929016	0.0507431
ENSMUSG00000004451_Ralb	35.2699	0.00707096	0.433665	0.0163051	0.986991	0.992183
ENSMUSG00000004455_Ppp1cc	279.505	0.520484	0.220534	2.36011	0.0182695	0.0757249
ENSMUSG00000004460_Dnajb11	82.8617	0.365865	0.327343	1.11768	0.263702	0.412563
ENSMUSG00000004462_Tbccd1	21.183	0.605124	0.528588	1.1448	0.252294	0.401086
ENSMUSG00000004473_Clec11a	18.5159	-0.728264	0.551018	-1.32167	0.186278	0.327489
ENSMUSG00000004500_Zfp324	19.038	-0.00669696	0.526055	-0.0127305	0.989843	0.993696
ENSMUSG00000004508_Gab2	63.8153	-0.601182	0.345765	-1.7387	0.0820872	0.192866
ENSMUSG00000004530_Coro1c	114.098	0.323165	0.281011	1.15001	0.25014	0.398763
ENSMUSG00000004535_Tax1bp1	548.706	0.547457	0.195583	2.7991	0.00512445	0.0357024
ENSMUSG00000004540_Psg17	5.28458	-2.05583	0.829666	-2.4779	0.0132158	0.0624169
ENSMUSG00000004542_Psg19	11.1309	-2.19607	0.728503	-3.01449	0.00257411	0.0233442
ENSMUSG00000004552_Ctse	2.09999	-0.991136	0.842991	-1.17574	0.2397	0.387236
ENSMUSG00000004558_Ndrg2	367.617	0.945999	0.203557	4.64734	3.36e-06	0.000400057
ENSMUSG00000004561_Mettl17	18.5857	-0.0871416	0.542731	-0.160561	0.872439	0.917349
ENSMUSG00000004562_Arhgef40	71.4598	-0.572129	0.336216	-1.70167	0.0888168	0.202373
ENSMUSG00000004565_Pnpla6	60.2621	0.211621	0.351552	0.601963	0.547199	0.67232
ENSMUSG00000004567_Mcoln1	98.1296	-0.269489	0.290068	-0.929054	0.352861	0.499699
ENSMUSG00000004568_Arhgef18	97.2212	0.347675	0.289176	1.20229	0.22925	0.375452
ENSMUSG00000004591_Pkn2	136.421	0.532036	0.284297	1.87141	0.0612885	0.160765
ENSMUSG00000004609_Cd33	32.2983	-1.9847	0.543015	-3.65497	0.000257215	0.00581019
ENSMUSG00000004610_Etfb	54.2477	0.462	0.360521	1.28148	0.200025	0.342902
ENSMUSG00000004612_Nkg7	0.65443	-0.667739	0.661464	-1.00949	0.312741	NA
ENSMUSG00000004613_Lim2	0.454493	-0.430788	0.604654	-0.712454	0.476184	NA
ENSMUSG00000004626_Stxbp2	25.0512	-0.204144	0.516347	-0.395362	0.692576	0.787459
ENSMUSG00000004630_Pcp2	640.184	0.814576	0.25304	3.21915	0.0012857	0.0153399
ENSMUSG00000004631_Sgce	61.6379	0.163292	0.360277	0.45324	0.650376	0.755029
ENSMUSG00000004633_Chn2	422.409	0.885143	0.184738	4.79135	1.66e-06	0.000254603
ENSMUSG00000004637_Wwox	94.0476	-0.359752	0.309797	-1.16125	0.24554	0.393792
ENSMUSG00000004642_Slbp	66.77	0.274185	0.323226	0.848276	0.396284	0.53967
ENSMUSG00000004651_Tyr	11.3649	-1.22039	0.746538	-1.63474	0.102104	0.220676
ENSMUSG00000004654_Ghrhr	5.10771	-3.1861	0.839318	-3.79605	0.000147018	0.00420563
ENSMUSG00000004655_Aqp1	3.04256	-2.04568	0.848279	-2.41156	0.0158843	0.0693469
ENSMUSG00000004661_Arid3b	22.6358	-1.59195	0.521159	-3.05464	0.0022533	0.0215953
ENSMUSG00000004665_Cnn2	6.69593	-0.804951	0.78224	-1.02903	0.303464	0.452506
ENSMUSG00000004667_Polr2e	26.7252	0.668923	0.491695	1.36044	0.173689	0.312652
ENSMUSG00000004668_Abca13	24.9428	-1.76251	0.56236	-3.13414	0.00172358	0.0183813
ENSMUSG00000004677_Myo9b	60.7769	-0.0790427	0.370425	-0.213384	0.831028	0.88902
ENSMUSG00000004698_Hdac9	42.6359	0.598332	0.431473	1.38672	0.165527	0.302929
ENSMUSG00000004707_Ly9	3.26101	-1.39061	0.839334	-1.65681	0.0975586	0.214646
ENSMUSG00000004709_Cd244	8.51948	-1.07515	0.767475	-1.4009	0.161245	0.298019
ENSMUSG00000004730_Adgre1	6.73977	-0.84826	0.74868	-1.13301	0.257211	0.406198
ENSMUSG00000004748_Mtfp1	27.997	0.0968399	0.456026	0.212356	0.831829	0.889611
ENSMUSG00000004768_Rab23	86.2308	-0.11317	0.292164	-0.387351	0.698496	0.791894
ENSMUSG00000004771_Rab11a	118.141	0.809409	0.311768	2.59619	0.00942636	0.0511193
ENSMUSG00000004788_Eif2b2	24.45	0.607169	0.542266	1.11969	0.262847	0.411663
ENSMUSG00000004789_Dlst	165.576	0.540779	0.251086	2.15376	0.0312592	0.10575
ENSMUSG00000004791_Pgf	2.83854	-1.58537	0.846937	-1.87189	0.0612222	0.160704
ENSMUSG00000004798_Ulk2	101.941	0.916517	0.319482	2.86876	0.0041209	0.031395
ENSMUSG00000004814_Ccl24	1.87745	-1.36345	0.838006	-1.62702	0.103733	NA
ENSMUSG00000004815_Dgkq	37.3327	0.19352	0.431735	0.448239	0.653981	0.757589
ENSMUSG00000004837_Grap	2.89738	-1.19996	0.847145	-1.41648	0.156635	0.292082
ENSMUSG00000004842_Pou1f1	14.2814	-1.43731	0.710237	-2.02371	0.0430004	0.128841
ENSMUSG00000004843_Chmp2b	63.069	0.636545	0.34621	1.83861	0.0659727	0.168681
ENSMUSG00000004846_Plod3	27.5255	-0.324236	0.499036	-0.649724	0.51587	0.646189
ENSMUSG00000004849_Ap1s1	47.892	0.143076	0.388645	0.368141	0.712768	0.802256
ENSMUSG00000004864_Mapk13	0.688809	0.201946	0.66829	0.302183	0.762513	NA
ENSMUSG00000004865_Srpk1	119.352	0.101886	0.263549	0.386594	0.699056	0.79235
ENSMUSG00000004872_Pax3	50.3587	-0.0675834	0.359281	-0.188108	0.850792	0.902483
ENSMUSG00000004880_Lbr	24.9878	0.139672	0.474776	0.294185	0.768616	0.842707
ENSMUSG00000004885_Crabp2	6.65889	-1.79097	0.794333	-2.25468	0.0241534	0.090001
ENSMUSG00000004891_Nes	50.6901	-1.1231	0.387632	-2.89735	0.00376333	0.0297962
ENSMUSG00000004892_Bcan	168.408	0.620469	0.236923	2.61887	0.0088222	0.0491562
ENSMUSG00000004894_Hapln2	7.27099	-0.389713	0.756141	-0.515397	0.606275	0.72036
ENSMUSG00000004895_Prcc	36.4031	0.459997	0.432196	1.06433	0.287181	0.436648
ENSMUSG00000004896_Rrnad1	54.1162	-0.340281	0.350016	-0.972187	0.330958	0.47847
ENSMUSG00000004897_Hdgf	142.925	0.268798	0.260837	1.03052	0.302767	0.451623
ENSMUSG00000004902_Slc25a18	87.5914	0.824867	0.323855	2.54702	0.0108647	0.0555551
ENSMUSG00000004929_Thop1	35.4147	-0.251578	0.420718	-0.597973	0.549858	0.674624
ENSMUSG00000004931_Apba3	11.8412	-0.0986762	0.665167	-0.148348	0.882068	0.924725
ENSMUSG00000004933_Matk	28.6839	-0.0105236	0.493636	-0.0213186	0.982992	0.989738
ENSMUSG00000004934_Pias4	36.6157	-0.218141	0.43335	-0.503383	0.614695	0.727151
ENSMUSG00000004936_Map2k1	111.478	0.970364	0.277477	3.4971	0.000470352	0.00837519
ENSMUSG00000004937_Sgta	58.0925	0.750875	0.366343	2.04965	0.0403986	0.123716
ENSMUSG00000004939_Nmrk2	1.97882	-0.773188	0.836996	-0.923766	0.355608	NA
ENSMUSG00000004945_Tmem242	25.4497	-0.031328	0.483019	-0.0648588	0.948286	0.967926
ENSMUSG00000004947_Dtx2	17.9888	-0.590912	0.532618	-1.10945	0.267238	0.415937
ENSMUSG00000004948_Zp3	1.51837	-1.32065	0.823727	-1.60326	0.108877	NA
ENSMUSG00000004951_Hspb1	6.55605	0.848981	0.776204	1.09376	0.27406	0.422748
ENSMUSG00000004952_Rasa4	35.7542	-0.208478	0.424796	-0.490773	0.623587	0.734139
ENSMUSG00000004961_Syt5	3.42943	0.0602561	0.82921	0.0726669	0.942071	0.964217
ENSMUSG00000004980_Hnrnpa2b1	1012.81	0.51245	0.16377	3.12909	0.00175348	0.0185527
ENSMUSG00000004988_Fxyd4	5.06646	-0.415933	0.813023	-0.511588	0.608939	0.722395
ENSMUSG00000004994_Ccdc130	20.9485	0.313473	0.521315	0.601312	0.547632	0.672628
ENSMUSG00000004996_Mri1	11.4117	-0.823259	0.620191	-1.32743	0.184367	0.325015
ENSMUSG00000005034_Prkacb	221.399	0.744818	0.217529	3.424	0.000617058	0.00992019
ENSMUSG00000005043_Sgsh	18.223	-0.253161	0.539222	-0.469493	0.638717	0.746066
ENSMUSG00000005045_Chd5	111.01	-0.0104001	0.3312	-0.0314014	0.974949	0.984879
ENSMUSG00000005054_Cstb	24.3703	1.07333	0.51113	2.09992	0.0357356	0.11463
ENSMUSG00000005057_Sh2b2	19.2495	-1.40198	0.528986	-2.65032	0.00804157	0.0464201
ENSMUSG00000005069_Pex5	34.3972	0.602906	0.436596	1.38092	0.167303	0.30517
ENSMUSG00000005078_Jkamp	30.8001	0.739635	0.483952	1.52832	0.126432	0.253719
ENSMUSG00000005087_Cd44	23.6648	-1.53286	0.49092	-3.12243	0.00179364	0.0187463
ENSMUSG00000005089_Slc1a2	2591.37	0.934295	0.179163	5.21478	1.84e-07	7.66e-05
ENSMUSG00000005102_Eif2ak4	34.3275	0.0671118	0.432662	0.155114	0.876732	0.920326
ENSMUSG00000005103_Wdr1	225.151	0.337581	0.222775	1.51534	0.129686	0.258223
ENSMUSG00000005107_Slc2a9	10.6946	-0.95568	0.723285	-1.32131	0.1864	0.327592
ENSMUSG00000005124_Wisp1	12.7996	-1.00293	0.618446	-1.6217	0.104868	0.224398
ENSMUSG00000005125_Ndrg1	35.544	-0.836363	0.419596	-1.99326	0.0462331	0.134835
ENSMUSG00000005131_4930550C14Rik	1.50238	-0.467346	0.822486	-0.568212	0.569891	NA
ENSMUSG00000005142_Man2b1	27.5177	0.17031	0.464463	0.366683	0.713856	0.803025
ENSMUSG00000005148_Klf5	14.2669	-1.98377	0.744549	-2.6644	0.00771267	0.0454317
ENSMUSG00000005150_Wdr83	17.7177	0.0309346	0.585972	0.0527919	0.957898	0.974467
ENSMUSG00000005161_Prdx2	151.316	0.479191	0.269474	1.77824	0.0753641	0.183019
ENSMUSG00000005198_Polr2a	230.778	0.541989	0.223	2.43045	0.0150802	0.0672229
ENSMUSG00000005204_Senp3	64.0849	-0.186133	0.357211	-0.521075	0.602315	0.717073
ENSMUSG00000005220_Corin	59.1931	0.861125	0.3703	2.32548	0.0200463	0.0799134
ENSMUSG00000005225_Plekha8	49.4501	0.593373	0.383222	1.54838	0.12153	0.246915
ENSMUSG00000005232_G6pc2	0.948532	-0.325035	0.746805	-0.435234	0.663392	NA
ENSMUSG00000005233_Spc25	3.43603	-1.81648	0.83598	-2.17287	0.0297898	0.102402
ENSMUSG00000005237_Dnah2	15.3319	-2.60761	0.64545	-4.03998	5.35e-05	0.00229647
ENSMUSG00000005251_Ripk4	3.87704	-1.75876	0.83782	-2.09921	0.0357986	0.114769
ENSMUSG00000005262_Ufd1l	77.9969	0.500733	0.312908	1.60025	0.109542	0.230841
ENSMUSG00000005267_Zfp287	50.4768	-0.0955195	0.362111	-0.263785	0.791945	0.860123
ENSMUSG00000005268_Prlr	28.0063	-1.73086	0.578567	-2.99164	0.00277486	0.0244631
ENSMUSG00000005299_Letm1	206.123	0.23758	0.212459	1.11823	0.263467	0.41232
ENSMUSG00000005312_Ubqln1	330.222	0.844278	0.256455	3.29212	0.000994368	0.0132406
ENSMUSG00000005320_Fgfr4	2.95672	-1.52015	0.849227	-1.79003	0.0734485	0.180126
ENSMUSG00000005338_Cadm3	353.313	0.954484	0.214771	4.44419	8.82e-06	0.000754242
ENSMUSG00000005354_Txn2	72.1056	0.600759	0.342178	1.75569	0.0791412	0.188605
ENSMUSG00000005355_Casp14	13.938	-2.39922	0.673294	-3.5634	0.000366081	0.00720602
ENSMUSG00000005357_Slc1a6	393.637	0.586301	0.249466	2.35022	0.0187621	0.0770267
ENSMUSG00000005360_Slc1a3	5393.08	0.723634	0.145521	4.97271	6.6e-07	0.00015391
ENSMUSG00000005362_Crbn	97.1981	0.52411	0.294643	1.7788	0.075273	0.182949
ENSMUSG00000005364_Il5ra	6.56207	-1.23797	0.807085	-1.53387	0.125061	0.252006
ENSMUSG00000005370_Msh6	73.1822	-0.0241434	0.319532	-0.0755586	0.93977	0.962549
ENSMUSG00000005371_Fbxo11	323.176	0.662179	0.178589	3.70783	0.000209046	0.00507529
ENSMUSG00000005373_Mlxipl	13.0593	-1.5899	0.686425	-2.31621	0.020547	0.0811665
ENSMUSG00000005374_Tbl2	53.0573	-0.462218	0.351087	-1.31653	0.187995	0.329432
ENSMUSG00000005378_Wbscr22	17.1705	0.0840945	0.611542	0.137512	0.890626	0.929688
ENSMUSG00000005397_Nid1	53.7815	0.186833	0.354293	0.527341	0.597957	0.713778
ENSMUSG00000005410_Mcm5	5.76612	0.772366	0.771263	1.00143	0.316619	0.464953
ENSMUSG00000005413_Hmox1	5.75306	-0.0489874	0.764665	-0.0640638	0.948919	0.968424
ENSMUSG00000005417_Mprip	2133.51	0.566323	0.160249	3.53402	0.000409289	0.00769791
ENSMUSG00000005442_Cic	154.627	0.68925	0.265103	2.59993	0.00932417	0.050843
ENSMUSG00000005447_Pafah1b3	6.16315	-0.572098	0.813672	-0.703106	0.48199	0.61669
ENSMUSG00000005465_Il27ra	1.59558	-1.19026	0.828413	-1.43679	0.150777	NA
ENSMUSG00000005469_Prkaca	146.219	0.672875	0.293557	2.29214	0.0218976	0.0845735
ENSMUSG00000005470_Asf1b	5.95879	-1.50344	0.795297	-1.89042	0.0587023	0.156639
ENSMUSG00000005474_Myl10	0.937858	-1.03089	0.746265	-1.3814	0.167155	NA
ENSMUSG00000005481_Ddx39	19.8971	-0.960503	0.52539	-1.82817	0.0675236	0.171038
ENSMUSG00000005483_Dnajb1	41.1526	0.434965	0.391017	1.11239	0.265969	0.414802
ENSMUSG00000005493_Msh4	9.28617	-1.24695	0.783623	-1.59126	0.111551	0.233229
ENSMUSG00000005501_Usp40	79.4828	0.34233	0.310791	1.10148	0.270687	0.419424
ENSMUSG00000005503_Evx1	5.51614	-1.58743	0.778357	-2.03946	0.0414044	0.125762
ENSMUSG00000005505_Kbtbd4	43.9696	0.476953	0.391391	1.21861	0.222993	0.368665
ENSMUSG00000005506_Celf1	231.932	0.814	0.213793	3.80743	0.000140419	0.00412424
ENSMUSG00000005510_Ndufs3	137.035	0.752667	0.257222	2.92614	0.00343198	0.0279704
ENSMUSG00000005514_Por	85.1845	0.541013	0.298064	1.81509	0.06951	0.174013
ENSMUSG00000005533_Igf1r	251.267	0.325685	0.228165	1.42741	0.153461	0.288581
ENSMUSG00000005534_Insr	175.232	0.173005	0.250229	0.691387	0.489323	0.622571
ENSMUSG00000005540_Fcer2a	11.5947	-0.440141	0.683904	-0.643572	0.519853	0.649351
ENSMUSG00000005547_Cyp2a5	2.10328	-0.796897	0.847631	-0.940146	0.347142	0.494176
ENSMUSG00000005553_Atp4a	4.12261	-2.37771	0.843716	-2.81814	0.00483028	0.0344001
ENSMUSG00000005566_Trim28	78.2163	0.595338	0.304241	1.9568	0.0503716	0.142369
ENSMUSG00000005575_Ube2m	73.9189	0.667677	0.342235	1.95093	0.0510656	0.14367
ENSMUSG00000005580_Adcy9	125.133	0.236551	0.280989	0.84185	0.399872	0.543241
ENSMUSG00000005583_Mef2c	238.168	0.397034	0.215855	1.83936	0.065862	0.168499
ENSMUSG00000005609_Ctr9	129.813	0.558621	0.262232	2.13025	0.0331507	0.10909
ENSMUSG00000005610_Eif4g2	717.977	1.1029	0.195285	5.64767	1.63e-08	2.1e-05
ENSMUSG00000005611_Mrvi1	10.2191	-1.54	0.753822	-2.04293	0.0410597	0.125
ENSMUSG00000005615_Pcyt1a	83.4417	-0.112312	0.299798	-0.374625	0.70794	0.799144
ENSMUSG00000005621_Zfp592	74.0507	0.11703	0.305518	0.383053	0.70168	0.794417
ENSMUSG00000005625_Psmd4	207.485	0.666102	0.219967	3.02819	0.00246024	0.0227256
ENSMUSG00000005628_Tmod4	0.380577	-0.188905	0.604589	-0.312452	0.754697	NA
ENSMUSG00000005640_Insrr	12.9609	-2.20095	0.719231	-3.06015	0.00221228	0.0213608
ENSMUSG00000005649_Cabp5	4.85801	-2.77545	0.827762	-3.35296	0.000799527	0.0115713
ENSMUSG00000005656_Snx6	77.0122	0.781438	0.316756	2.46701	0.0136248	0.0635349
ENSMUSG00000005667_Mthfd2	11.4304	0.45506	0.641011	0.70991	0.47776	0.613208
ENSMUSG00000005672_Kit	199.757	0.72429	0.236926	3.05703	0.0022354	0.0214657
ENSMUSG00000005674_Tomm40l	42.4842	0.171398	0.420263	0.407834	0.683395	0.779892
ENSMUSG00000005677_Nr1i3	9.84865	-3.05036	0.776836	-3.92665	8.61e-05	0.00309321
ENSMUSG00000005681_Apoa2	0.286729	0.175506	0.606605	0.289324	0.772333	NA
ENSMUSG00000005682_Pan2	28.4555	0.0905713	0.471496	0.192094	0.847669	0.900574
ENSMUSG00000005683_Cs	183.389	0.806952	0.238693	3.38071	0.000722983	0.0108338
ENSMUSG00000005686_Ampd3	38.6327	-0.192173	0.400496	-0.479839	0.631342	0.740063
ENSMUSG00000005687_Bcas2	86.5584	0.645412	0.308648	2.09109	0.0365198	0.116035
ENSMUSG00000005696_Sh2d1a	4.03586	0.576761	0.841165	0.685668	0.492922	0.625927
ENSMUSG00000005698_Ctcf	117.327	0.450332	0.265913	1.69353	0.0903542	0.20465
ENSMUSG00000005699_Pard6a	11.188	0.696775	0.673423	1.03468	0.30082	0.449944
ENSMUSG00000005716_Pvalb	1047.38	0.804726	0.179582	4.4811	7.43e-06	0.000702318
ENSMUSG00000005718_Tfap4	7.16752	-0.407397	0.734975	-0.554301	0.579373	0.69973
ENSMUSG00000005732_Ranbp1	117.981	0.408899	0.278291	1.46932	0.141746	0.27379
ENSMUSG00000005763_Cd247	18.9123	-0.774694	0.576973	-1.34269	0.179374	0.319071
ENSMUSG00000005774_Rfx5	40.6501	0.230122	0.391304	0.58809	0.556472	0.679992
ENSMUSG00000005779_Psmb4	38.8231	0.387946	0.418958	0.92598	0.354456	0.501282
ENSMUSG00000005800_Mmp8	10.9665	-1.89128	0.761191	-2.48463	0.0129685	0.0616938
ENSMUSG00000005802_Slc30a4	71.6287	0.53312	0.348565	1.52947	0.126148	0.253385
ENSMUSG00000005803_Sqrdl	16.138	0.481473	0.562871	0.855387	0.392337	0.536108
ENSMUSG00000005804_Bloc1s6	28.6023	0.10205	0.448176	0.227701	0.819879	0.880478
ENSMUSG00000005813_Metap1	66.9103	0.350518	0.338613	1.03516	0.300595	0.449742
ENSMUSG00000005823_Gpr108	12.6272	0.324915	0.672134	0.483407	0.628807	0.737861
ENSMUSG00000005824_Tnfsf14	6.01637	-1.43162	0.788413	-1.81582	0.0693975	0.173925
ENSMUSG00000005836_Gata6	3.40658	-1.40076	0.839698	-1.66817	0.095283	0.211987
ENSMUSG00000005846_Rsl1d1	81.5487	0.334899	0.318794	1.05052	0.293479	0.442757
ENSMUSG00000005864_Cnga2	4.15384	-1.16151	0.829608	-1.40007	0.161492	0.298253
ENSMUSG00000005871_Apc	796.759	0.59546	0.165327	3.60171	0.000316126	0.00662504
ENSMUSG00000005873_Reep5	124.848	1.15019	0.291722	3.94274	8.06e-05	0.00298398
ENSMUSG00000005881_Ergic3	41.8207	1.23455	0.414233	2.98032	0.00287949	0.0250406
ENSMUSG00000005882_Uqcc1	91.0198	-0.392609	0.307398	-1.2772	0.201531	0.344387
ENSMUSG00000005883_Spo11	4.74217	-1.12545	0.83284	-1.35134	0.176587	0.315828
ENSMUSG00000005886_Ncoa2	278.016	0.609365	0.1917	3.17875	0.00147911	0.0168001
ENSMUSG00000005892_Trh	2.18819	-1.54332	0.844678	-1.82711	0.0676828	0.171139
ENSMUSG00000005893_Nr2c2	139.173	0.530057	0.259134	2.04549	0.0408063	0.124434
ENSMUSG00000005897_Nr2c1	27.768	-0.0787206	0.458187	-0.171809	0.863588	0.910899
ENSMUSG00000005899_Smpd4	85.2564	0.240938	0.287765	0.837274	0.402439	0.545952
ENSMUSG00000005907_Pex1	59.8769	-0.334108	0.366111	-0.912588	0.361459	0.507588
ENSMUSG00000005917_Otx1	24.2953	-2.89786	0.584926	-4.95424	7.26e-07	0.000156236
ENSMUSG00000005936_Kctd20	63.4511	0.577867	0.339576	1.70173	0.0888058	0.202373
ENSMUSG00000005947_Itgae	5.49471	-2.41201	0.799802	-3.01576	0.00256334	0.023284
ENSMUSG00000005949_Ctns	17.5358	-0.112399	0.554345	-0.20276	0.839323	0.894772
ENSMUSG00000005950_P2rx5	1.89958	0.280362	0.84318	0.332506	0.739507	NA
ENSMUSG00000005951_Shpk	9.19182	-0.721625	0.687191	-1.05011	0.293668	0.442964
ENSMUSG00000005952_Trpv1	7.18295	-1.98805	0.761675	-2.6101	0.00905147	0.0499893
ENSMUSG00000005958_Ephb3	7.00855	-1.8719	0.774524	-2.41684	0.0156557	0.0687872
ENSMUSG00000005968_Tuft1	11.7811	-0.276406	0.713059	-0.387635	0.698286	0.791755
ENSMUSG00000005973_Rcn1	14.1329	0.0969853	0.579005	0.167503	0.866974	0.91325
ENSMUSG00000005980_Dnase1	11.1625	-0.663505	0.711755	-0.93221	0.351228	0.498225
ENSMUSG00000005981_Trap1	109.627	0.896025	0.297817	3.00864	0.00262421	0.0236501
ENSMUSG00000005982_Naa60	63.0252	0.2114	0.328078	0.644357	0.519344	0.648967
ENSMUSG00000005983_1700037C18Rik	4.4427	-0.914599	0.802836	-1.13921	0.254615	0.403431
ENSMUSG00000005986_Ankrd13d	17.6251	0.997638	0.575478	1.73358	0.0829927	0.194076
ENSMUSG00000005994_Tyrp1	6.94112	-1.23146	0.77308	-1.59293	0.111177	0.232785
ENSMUSG00000006005_Tpr	973.193	0.445911	0.158501	2.81331	0.00490351	0.0347158
ENSMUSG00000006007_Pdc	6.37606	-1.92449	0.794454	-2.42241	0.0154179	0.0680772
ENSMUSG00000006010_BC003331	172.747	0.244004	0.230178	1.06007	0.289115	0.438324
ENSMUSG00000006014_Prg4	13.1726	-1.83408	0.685685	-2.67481	0.00747721	0.0445025
ENSMUSG00000006019_Dhx34	15.8797	-1.32641	0.590924	-2.24463	0.0247919	0.0916789
ENSMUSG00000006021_Kptn	8.08932	-0.337139	0.729585	-0.462097	0.644012	0.750225
ENSMUSG00000006024_Napa	99.3533	0.787319	0.288899	2.72524	0.0064255	0.0406099
ENSMUSG00000006050_Sra1	49.5839	0.267463	0.400781	0.667355	0.504546	0.636295
ENSMUSG00000006056_Calcoco2	4.13846	-2.88093	0.845891	-3.4058	0.000659715	0.0102493
ENSMUSG00000006057_Atp5g1	67.0643	0.268428	0.330154	0.813039	0.416195	0.557976
ENSMUSG00000006058_Snf8	56.9666	-0.0336531	0.424193	-0.0793345	0.936767	0.960082
ENSMUSG00000006095_Tbcb	40.4773	0.557732	0.418204	1.33364	0.182322	0.322644
ENSMUSG00000006127_Inpp5k	69.8735	0.434306	0.31749	1.36794	0.171332	0.310007
ENSMUSG00000006134_Crkl	86.2387	1.11986	0.32395	3.4569	0.000546425	0.00920076
ENSMUSG00000006143_Upk3bl	0.971764	-0.0827911	0.775116	-0.106811	0.914939	NA
ENSMUSG00000006154_Eps8l1	19.3821	-0.465057	0.541003	-0.859619	0.389999	0.53387
ENSMUSG00000006169_Clint1	161.2	0.312534	0.240278	1.30072	0.193355	0.335331
ENSMUSG00000006179_Prss16	3.47984	-0.712272	0.833887	-0.854159	0.393017	0.536705
ENSMUSG00000006191_Cdkal1	75.594	0.096516	0.31716	0.304314	0.760889	0.836366
ENSMUSG00000006200_Rhox6	1.19917	-0.164826	0.775556	-0.212526	0.831697	NA
ENSMUSG00000006204_5430419D17Rik	11.0174	-2.61187	0.754417	-3.46211	0.000535966	0.00913689
ENSMUSG00000006205_Htra1	205.197	0.766137	0.253041	3.02772	0.00246406	0.0227375
ENSMUSG00000006215_Zbtb17	25.8026	0.264167	0.469093	0.563143	0.573338	0.69452
ENSMUSG00000006216_Clcnkb	5.18846	-1.35381	0.812486	-1.66625	0.0956629	0.212427
ENSMUSG00000006218_Fam131c	2.50379	-1.11062	0.849166	-1.3079	0.190908	0.332556
ENSMUSG00000006219_Fblim1	6.97943	-1.43638	0.774549	-1.85447	0.0636722	0.164973
ENSMUSG00000006221_Hspb7	6.97349	-1.04531	0.792852	-1.31842	0.187363	0.328681
ENSMUSG00000006235_Epor	4.42433	-0.64334	0.802195	-0.801975	0.422568	0.563402
ENSMUSG00000006241_Ccdc159	4.0422	0.132743	0.80357	0.165192	0.868793	0.914744
ENSMUSG00000006262_Mob1b	112.506	-0.113859	0.302673	-0.376178	0.706785	0.798481
ENSMUSG00000006269_Atp6v1b1	11.2009	-1.27575	0.684519	-1.86371	0.0623621	0.162688
ENSMUSG00000006270_Vax1	0.399874	-0.430788	0.604654	-0.712454	0.476184	NA
ENSMUSG00000006273_Atp6v1b2	268.044	1.10196	0.213007	5.17334	2.3e-07	8.57e-05
ENSMUSG00000006276_Eps15l1	86.8555	1.11478	0.317901	3.5067	0.0004537	0.0082344
ENSMUSG00000006281_Tep1	14.706	-0.27824	0.620326	-0.448538	0.653765	0.75754
ENSMUSG00000006288_Ttc5	75.8392	-0.0460215	0.376249	-0.122316	0.902648	0.937893
ENSMUSG00000006289_Osgep	30.3855	-0.0307759	0.437402	-0.0703607	0.943907	0.965292
ENSMUSG00000006299_Aamp	417.694	-0.202235	0.54636	-0.370149	0.711272	0.801201
ENSMUSG00000006301_Tmbim1	80.942	-0.812637	0.314137	-2.58689	0.00968474	0.0518346
ENSMUSG00000006304_Arpc2	136.781	0.574203	0.256285	2.24048	0.0250596	0.0922724
ENSMUSG00000006307_Kmt2b	110.836	0.114623	0.266161	0.430651	0.666722	0.767322
ENSMUSG00000006310_Zbtb32	6.92633	-1.10603	0.790272	-1.39955	0.161647	0.298475
ENSMUSG00000006311_Etv2	0.454493	-0.430788	0.604654	-0.712454	0.476184	NA
ENSMUSG00000006313_Upk1a	1.47584	-1.48295	0.808319	-1.83461	0.0665629	NA
ENSMUSG00000006315_Tmem147	14.6574	1.07776	0.632857	1.703	0.088568	0.202033
ENSMUSG00000006333_Rps9	90.4151	0.768885	0.303382	2.53438	0.0112646	0.0565321
ENSMUSG00000006335_Tfpt	27.3686	-0.227599	0.492042	-0.462559	0.64368	0.749952
ENSMUSG00000006342_Susd2	6.43507	-0.872552	0.733605	-1.1894	0.234281	0.381081
ENSMUSG00000006344_Ggt5	21.9932	-2.19068	0.617279	-3.54893	0.000386802	0.00741042
ENSMUSG00000006345_Ggt1	7.76184	-2.34194	0.765982	-3.05743	0.00223244	0.0214512
ENSMUSG00000006356_Crip2	12.5057	-0.0349187	0.648951	-0.0538078	0.957088	0.973893
ENSMUSG00000006360_Crip1	6.96302	-2.04836	0.786193	-2.60541	0.00917644	0.0503563
ENSMUSG00000006362_Cbfa2t3	39.515	0.28629	0.403379	0.70973	0.477872	0.61329
ENSMUSG00000006369_Fbln1	6.8481	-0.273568	0.733427	-0.372999	0.709149	0.800019
ENSMUSG00000006373_Pgrmc1	88.4303	1.29657	0.359312	3.60848	0.000307997	0.00652352
ENSMUSG00000006378_Gcat	8.95448	-0.946832	0.689031	-1.37415	0.169395	0.307611
ENSMUSG00000006386_Tek	19.5112	-0.513845	0.554951	-0.925929	0.354483	0.501282
ENSMUSG00000006389_Mpl	7.01393	-1.75097	0.78592	-2.22793	0.0258853	0.0942345
ENSMUSG00000006390_Elovl1	15.7819	-0.587808	0.614309	-0.956861	0.338638	0.485873
ENSMUSG00000006392_Med8	58.9081	0.145348	0.334311	0.43477	0.663729	0.764997
ENSMUSG00000006395_Hyi	10.4216	-0.666514	0.667938	-0.997869	0.318343	0.466369
ENSMUSG00000006398_Cdc20	4.71364	-0.453179	0.796415	-0.569024	0.56934	0.690877
ENSMUSG00000006403_Adamts4	45.0081	0.543783	0.484278	1.12287	0.261492	0.410373
ENSMUSG00000006411_Pvrl4	17.3289	0.171814	0.554644	0.309773	0.756734	0.833324
ENSMUSG00000006412_Pfdn2	69.2674	0.354287	0.345436	1.02562	0.30507	0.454139
ENSMUSG00000006418_Rnf114	36.7795	0.0550936	0.413787	0.133145	0.894079	0.931978
ENSMUSG00000006423_C330007P06Rik	113.658	0.233464	0.264166	0.883778	0.376816	0.521943
ENSMUSG00000006435_Neurl1a	31.5069	0.491432	0.467186	1.0519	0.292847	0.442259
ENSMUSG00000006442_Srm	11.2043	0.799968	0.666968	1.19941	0.230369	0.376616
ENSMUSG00000006445_Epha2	6.00555	-2.54167	0.802104	-3.16876	0.00153093	0.0171633
ENSMUSG00000006456_Rbm14	39.9164	0.600049	0.42089	1.42567	0.153964	0.28919
ENSMUSG00000006457_Actn3	1.20938	0.908641	0.758094	1.19859	0.230689	NA
ENSMUSG00000006462_A530013C23Rik	14.3191	-1.46989	0.685432	-2.14447	0.0319956	0.107115
ENSMUSG00000006463_Zdhhc24	47.6724	-0.666942	0.401168	-1.6625	0.0964122	0.213287
ENSMUSG00000006464_Bbs1	31.2663	-0.256515	0.46636	-0.550035	0.582295	0.702045
ENSMUSG00000006469_Slc34a3	0.780451	-0.636495	0.718366	-0.886032	0.3756	NA
ENSMUSG00000006471_Ndor1	24.8395	-0.871285	0.492037	-1.77077	0.0765986	0.184711
ENSMUSG00000006476_Nsmf	44.8396	0.969107	0.387901	2.49834	0.0124778	0.0601276
ENSMUSG00000006494_Pdk1	45.8521	-0.545059	0.371238	-1.46822	0.142044	0.274181
ENSMUSG00000006498_Ptbp1	35.3452	-0.123123	0.428451	-0.287368	0.77383	0.846734
ENSMUSG00000006517_Mvd	5.262	1.08459	0.82112	1.32087	0.186544	0.327735
ENSMUSG00000006519_Cyba	1.26544	-0.0270642	0.807062	-0.0335342	0.973249	NA
ENSMUSG00000006522_Itih3	183.067	0.950168	0.225818	4.20768	2.58e-05	0.00142644
ENSMUSG00000006526_Tmem110	22.4343	0.56609	0.501321	1.1292	0.258815	0.407833
ENSMUSG00000006527_Sfmbt1	75.4509	0.220176	0.333938	0.659332	0.509682	0.640696
ENSMUSG00000006529_Itih1	2.06075	-0.825749	0.840677	-0.982243	0.32598	0.473912
ENSMUSG00000006538_Ihh	3.44243	-2.25064	0.844788	-2.66415	0.00771828	0.0454317
ENSMUSG00000006542_Prkag3	9.67264	-1.89028	0.684482	-2.76162	0.00575161	0.0381394
ENSMUSG00000006546_Cryba2	1.04866	-1.10905	0.760154	-1.45897	0.144572	NA
ENSMUSG00000006567_Atp7b	11.6318	-0.450749	0.621522	-0.725234	0.468308	0.60497
ENSMUSG00000006570_Defb2	0.454493	-0.430788	0.604654	-0.712454	0.476184	NA
ENSMUSG00000006574_Slc4a1	4.38599	-2.04037	0.813977	-2.50667	0.0121875	0.0592778
ENSMUSG00000006575_Rundc3a	182.725	0.579933	0.23571	2.46037	0.0138793	0.064117
ENSMUSG00000006576_Slc4a3	130.704	-0.00103989	0.314867	-0.00330263	0.997365	0.998326
ENSMUSG00000006585_Cdt1	4.33166	-0.87769	0.831878	-1.05507	0.291393	0.44051
ENSMUSG00000006586_Runx1t1	64.3623	-0.432044	0.319945	-1.35037	0.176896	0.316178
ENSMUSG00000006587_Snai3	1.98087	-1.71332	0.826322	-2.07342	0.0381328	NA
ENSMUSG00000006589_Aprt	4.77714	-0.357128	0.797848	-0.447614	0.654432	0.757941
ENSMUSG00000006599_Gtf2h1	67.4829	0.44	0.318815	1.38011	0.167552	0.305424
ENSMUSG00000006611_Hfe	14.4172	0.140378	0.597918	0.234778	0.814381	0.876799
ENSMUSG00000006638_Abhd1	3.04723	1.25716	0.848698	1.48128	0.138531	0.269684
ENSMUSG00000006641_Slc5a6	15.0316	-0.0975772	0.57933	-0.168431	0.866244	0.912928
ENSMUSG00000006642_Tcf23	12.4829	-1.38446	0.652259	-2.12257	0.0337903	0.110346
ENSMUSG00000006649_Nphs1	6.56551	-1.73102	0.748118	-2.31383	0.020677	0.0814404
ENSMUSG00000006651_Aplp1	286.615	0.839933	0.262429	3.20062	0.00137134	0.0159705
ENSMUSG00000006673_Qrich1	154.407	0.54553	0.250424	2.17843	0.0293743	0.101626
ENSMUSG00000006675_P4htm	37.5721	-0.114468	0.410047	-0.279158	0.780123	0.851162
ENSMUSG00000006676_Usp19	148.744	0.519587	0.26251	1.97931	0.0477816	0.137674
ENSMUSG00000006678_Pola1	42.3712	-0.168854	0.405761	-0.416142	0.677306	0.775184
ENSMUSG00000006699_Cdc42	238.062	0.803383	0.270004	2.97545	0.00292558	0.0252881
ENSMUSG00000006705_Pknox1	40.9895	-0.198822	0.386938	-0.513835	0.607367	0.721319
ENSMUSG00000006711_D130043K22Rik	24.0038	-0.00756152	0.513548	-0.0147241	0.988252	0.99279
ENSMUSG00000006715_Gmnn	5.92468	1.25735	0.783058	1.60569	0.108343	0.229437
ENSMUSG00000006717_Acot13	98.8239	0.532209	0.310084	1.71634	0.0861002	0.198307
ENSMUSG00000006720_Zfp184	9.82815	-0.849529	0.691549	-1.22844	0.21928	0.364371
ENSMUSG00000006724_Cyp27b1	5.02241	-1.18826	0.787617	-1.50868	0.131382	0.260353
ENSMUSG00000006728_Cdk4	25.791	0.0243992	0.496001	0.0491918	0.960766	0.976269
ENSMUSG00000006731_B4galnt1	35.1643	0.665643	0.436428	1.52521	0.127207	0.254759
ENSMUSG00000006732_Mettl1	9.71137	-0.33139	0.678899	-0.488128	0.625459	0.735681
ENSMUSG00000006736_Tspan31	28.3449	1.03831	0.484411	2.14345	0.0320772	0.107308
ENSMUSG00000006740_Kif5b	720.442	0.594907	0.182116	3.26664	0.00108834	0.0137971
ENSMUSG00000006763_Saal1	28.8897	-0.113073	0.445075	-0.254055	0.799453	0.866061
ENSMUSG00000006764_Tph2	3.55692	-1.01009	0.839491	-1.20322	0.228891	0.375078
ENSMUSG00000006777_Krt23	0.657726	-0.345138	0.690664	-0.499719	0.617273	NA
ENSMUSG00000006782_Cnp	210.299	0.910622	0.245681	3.70652	0.000210126	0.00508935
ENSMUSG00000006784_Ttc25	14.0346	-1.7874	0.625325	-2.85836	0.00425841	0.0320107
ENSMUSG00000006800_Sulf2	21.8575	-0.392079	0.514385	-0.76223	0.445923	0.584757
ENSMUSG00000006818_Sod2	244.163	0.833209	0.212257	3.92548	8.66e-05	0.00309958
ENSMUSG00000006850_Tmco6	4.24912	0.437021	0.821932	0.5317	0.594934	0.711271
ENSMUSG00000006906_Stambp	81.6082	-0.0963789	0.338555	-0.284677	0.775891	0.848125
ENSMUSG00000006920_Ezh1	101.521	0.371432	0.269177	1.37988	0.167623	0.305532
ENSMUSG00000006930_Hap1	51.7499	0.325919	0.384462	0.847726	0.396591	0.53989
ENSMUSG00000006931_P3h4	5.28315	-0.192898	0.775754	-0.248659	0.803625	0.868586
ENSMUSG00000006932_Ctnnb1	366.262	1.04093	0.258428	4.02794	5.63e-05	0.0023546
ENSMUSG00000006941_Eif1b	85.4127	0.5952	0.309335	1.92412	0.054339	0.149094
ENSMUSG00000006948_Klk4	3.72414	-1.86064	0.84883	-2.19201	0.0283791	0.0995137
ENSMUSG00000006958_Chrd	18.1471	-0.652267	0.571757	-1.14081	0.253948	0.402818
ENSMUSG00000006998_Psmd2	274.109	0.668253	0.200141	3.33891	0.000841081	0.0119245
ENSMUSG00000007021_Syngr3	37.8125	0.69075	0.417551	1.65429	0.098069	0.215237
ENSMUSG00000007029_Vars	37.4263	0.399127	0.424897	0.93935	0.347551	0.494512
ENSMUSG00000007030_Vwa7	13.3231	-0.57479	0.594059	-0.967564	0.333262	0.480636
ENSMUSG00000007033_Hspa1l	3.63279	-0.993056	0.845745	-1.17418	0.240323	0.387952
ENSMUSG00000007034_Slc44a4	3.3839	-1.75131	0.847115	-2.06739	0.0386979	0.120378
ENSMUSG00000007035_Msh5	6.09686	-0.814643	0.749398	-1.08706	0.277009	0.425999
ENSMUSG00000007036_Abhd16a	42.4446	0.611889	0.402887	1.51876	0.128822	0.257025
ENSMUSG00000007038_Neu1	43.9695	-0.137764	0.388872	-0.354267	0.723139	0.809062
ENSMUSG00000007039_Ddah2	13.8938	0.199936	0.610777	0.327346	0.743406	0.823364
ENSMUSG00000007041_Clic1	18.8485	0.746769	0.545645	1.3686	0.171125	0.309767
ENSMUSG00000007050_Lsm2	11.4469	-0.696798	0.654837	-1.06408	0.287293	0.436739
ENSMUSG00000007080_Pole	12.3286	-1.64259	0.672948	-2.44088	0.0146514	0.065995
ENSMUSG00000007097_Atp1a2	1696.37	0.648443	0.1811	3.58057	0.000342839	0.00695347
ENSMUSG00000007107_Atp1a4	0.965168	-1.05098	0.749985	-1.40133	0.161114	NA
ENSMUSG00000007122_Casq1	1.42466	-0.174353	0.818158	-0.213104	0.831246	NA
ENSMUSG00000007207_Stx1a	6.44361	-0.11497	0.767311	-0.149835	0.880894	0.923607
ENSMUSG00000007209_Ceacam9	3.07388	-0.224842	0.844089	-0.266372	0.789952	0.858842
ENSMUSG00000007216_Zfp775	15.2885	-1.52652	0.616546	-2.47592	0.0132893	0.0626238
ENSMUSG00000007279_Scube2	4.80903	-0.820509	0.801219	-1.02408	0.305799	0.454792
ENSMUSG00000007338_Mrpl49	41.3436	0.297327	0.400698	0.742022	0.458074	0.595564
ENSMUSG00000007379_Dennd2c	19.6759	-1.2143	0.583383	-2.08147	0.0373905	0.117711
ENSMUSG00000007411_Mark3	124.063	0.753857	0.274821	2.74308	0.00608656	0.0393561
ENSMUSG00000007415_Gatad1	87.1408	0.544043	0.295602	1.84046	0.0657006	0.168253
ENSMUSG00000007440_Pcdha11	14.8661	-0.514759	0.58668	-0.877411	0.380263	0.52514
ENSMUSG00000007457_2310003L06Rik	5.71599	-1.73342	0.80719	-2.14747	0.0317556	0.106883
ENSMUSG00000007458_M6pr	146.752	0.501046	0.242568	2.06559	0.0388672	0.120759
ENSMUSG00000007476_Lrrc8a	193.089	0.384294	0.232195	1.65505	0.0979151	0.2151
ENSMUSG00000007480_Mc5r	5.30726	-1.49348	0.786446	-1.89902	0.057562	0.154458
ENSMUSG00000007564_Ppp2r1a	208.677	0.973717	0.22685	4.29233	1.77e-05	0.00113556
ENSMUSG00000007570_Fance	8.25432	-0.101322	0.702029	-0.144328	0.885242	0.926434
ENSMUSG00000007589_Tinf2	27.4033	0.233667	0.462052	0.505716	0.613056	0.725811
ENSMUSG00000007591_Tssk4	3.9337	-0.853485	0.823894	-1.03592	0.300242	0.449518
ENSMUSG00000007594_Hapln4	167.239	0.681028	0.265706	2.56309	0.0103744	0.0541453
ENSMUSG00000007603_Dus3l	33.5039	0.701013	0.475631	1.47386	0.14052	0.272174
ENSMUSG00000007610_Gtpbp3	30.439	-0.602881	0.439742	-1.37099	0.170379	0.308855
ENSMUSG00000007613_Tgfbr1	28.8129	0.22261	0.458031	0.486015	0.626957	0.736594
ENSMUSG00000007617_Homer1	111.58	0.523292	0.270082	1.93753	0.0526804	0.146285
ENSMUSG00000007646_Rad51c	10.3024	-0.636072	0.653128	-0.973885	0.330114	0.477749
ENSMUSG00000007653_Gabrb2	352.18	0.673954	0.208469	3.23287	0.00122553	0.0148833
ENSMUSG00000007655_Cav1	5.58261	-0.44098	0.767494	-0.574572	0.565581	0.687419
ENSMUSG00000007656_Arpp19	187.659	0.396923	0.219885	1.80514	0.0710533	0.176488
ENSMUSG00000007659_Bcl2l1	137.909	0.470039	0.270221	1.73946	0.0819536	0.192693
ENSMUSG00000007670_Khsrp	93.2736	0.659583	0.314427	2.09773	0.0359289	0.114979
ENSMUSG00000007682_Dio2	76.3329	0.672144	0.306482	2.19309	0.0283008	0.0993763
ENSMUSG00000007721_Ccdc124	103.681	0.362512	0.348793	1.03933	0.29865	0.447888
ENSMUSG00000007739_Cct4	71.1017	0.582262	0.356296	1.63421	0.102215	0.220733
ENSMUSG00000007777_0610009B22Rik	10.495	0.90354	0.668739	1.35111	0.17666	0.315915
ENSMUSG00000007783_Cpt1c	23.8416	0.494586	0.519674	0.951723	0.341238	0.488166
ENSMUSG00000007805_Twist2	3.7735	-1.38997	0.819093	-1.69696	0.0897044	0.203737
ENSMUSG00000007812_Zfp655	79.2196	0.350757	0.313907	1.11739	0.263827	0.412658
ENSMUSG00000007815_Rhoa	191.127	0.464889	0.238739	1.94727	0.0515021	0.144411
ENSMUSG00000007817_Zmiz1	241.578	0.671946	0.211185	3.18178	0.00146371	0.016685
ENSMUSG00000007827_Ankrd26	137.599	0.375857	0.263348	1.42722	0.153516	0.288662
ENSMUSG00000007833_Aldh16a1	2.65823	0.441309	0.849089	0.519745	0.603241	0.717771
ENSMUSG00000007836_Hnrnpa0	98.0226	1.06349	0.28877	3.6828	0.000230682	0.00543173
ENSMUSG00000007837_Prrg2	4.31409	-0.215589	0.821653	-0.262384	0.793025	0.860987
ENSMUSG00000007850_Hnrnph1	406.596	0.468221	0.181155	2.58464	0.00974808	0.0520381
ENSMUSG00000007867_Ift43	6.2725	-0.563999	0.796225	-0.708341	0.478734	0.613999
ENSMUSG00000007872_Id3	4.75383	-0.513889	0.794839	-0.646532	0.517935	0.64789
ENSMUSG00000007877_Tcap	3.10425	-0.459152	0.841361	-0.545725	0.585255	0.70381
ENSMUSG00000007880_Arid1a	330.789	0.231795	0.205353	1.12877	0.258996	0.407988
ENSMUSG00000007888_Crlf1	0.82173	0.212873	0.724732	0.293726	0.768967	NA
ENSMUSG00000007891_Ctsd	125.824	0.863947	0.284046	3.04158	0.00235343	0.0221287
ENSMUSG00000007892_Rplp1	147.37	0.560218	0.267574	2.09369	0.0362873	0.115581
ENSMUSG00000007907_Cabs1	1.41657	-0.407289	0.839659	-0.485065	0.62763	NA
ENSMUSG00000007908_Hmgcll1	26.0885	0.939993	0.573922	1.63784	0.101455	0.219762
ENSMUSG00000007944_Ttc9b	12.031	0.25421	0.62808	0.404742	0.685667	0.781946
ENSMUSG00000007946_Phox2a	4.24235	-2.05679	0.841138	-2.44525	0.0144753	0.0654533
ENSMUSG00000007950_Abhd8	40.2635	1.04356	0.465994	2.23944	0.0251276	0.0924178
ENSMUSG00000007987_Ift22	35.3651	0.00699705	0.434584	0.0161006	0.987154	0.992222
ENSMUSG00000007989_Fzd3	80.3444	0.354118	0.2961	1.19594	0.231719	0.377985
ENSMUSG00000008028_1700008O03Rik	13.3908	-2.05476	0.684941	-2.99991	0.0027006	0.0240936
ENSMUSG00000008035_Mid1ip1	178.886	0.702413	0.270594	2.59582	0.00943652	0.0511422
ENSMUSG00000008036_Ap2s1	30.5489	0.643593	0.470457	1.36802	0.171307	0.309993
ENSMUSG00000008090_Fgfrl1	20.5876	0.342444	0.541003	0.63298	0.526747	0.654763
ENSMUSG00000008129_4930432K21Rik	7.96608	-2.01131	0.748027	-2.68882	0.00717059	0.0432059
ENSMUSG00000008136_Fhl2	4.46943	-2.21469	0.828748	-2.67233	0.00753255	0.0447602
ENSMUSG00000008140_Emc10	34.4883	2.03167	0.478715	4.24401	2.2e-05	0.00130005
ENSMUSG00000008153_Clstn3	699.793	0.93035	0.209988	4.43048	9.4e-06	0.00077807
ENSMUSG00000008167_Fbxw9	12.8496	-0.037056	0.647174	-0.0572581	0.95434	0.972034
ENSMUSG00000008193_Spib	4.81932	-0.921099	0.803452	-1.14643	0.251619	0.400242
ENSMUSG00000008200_Fnbp4	186.353	0.0597907	0.225147	0.265563	0.790576	0.859122
ENSMUSG00000008206_Cers4	179.464	-0.610787	0.228379	-2.67444	0.00748532	0.0445102
ENSMUSG00000008226_Scrn3	66.3438	-0.135452	0.320157	-0.423079	0.672237	0.77112
ENSMUSG00000008301_Phax	56.8881	0.609559	0.366525	1.66308	0.0962967	0.213207
ENSMUSG00000008305_Tle1	55.491	-0.18606	0.354486	-0.524872	0.599672	0.715048
ENSMUSG00000008307_1700109H08Rik	16.6629	0.0433148	0.60058	0.0721216	0.942505	0.964312
ENSMUSG00000008318_Relt	15.7283	-0.0809129	0.598192	-0.135262	0.892404	0.930836
ENSMUSG00000008333_Snrpb2	50.7433	0.400591	0.384006	1.04319	0.29686	0.446059
ENSMUSG00000008348_Ubc	545.142	1.10824	0.210791	5.25751	1.46e-07	6.8e-05
ENSMUSG00000008373_Prpf31	105	-0.260044	0.298238	-0.871934	0.383244	0.527733
ENSMUSG00000008384_Sertad1	6.7178	-0.609361	0.74647	-0.816323	0.414315	0.556219
ENSMUSG00000008393_Carhsp1	14.2804	0.196369	0.632743	0.310345	0.756298	0.833041
ENSMUSG00000008398_Elk3	20.0868	-0.0641504	0.519974	-0.123372	0.901812	0.93743
ENSMUSG00000008429_Herpud2	71.4202	0.701913	0.358099	1.96011	0.0499833	0.141706
ENSMUSG00000008435_Rdh13	28.9237	-0.621047	0.498905	-1.24482	0.213198	0.357251
ENSMUSG00000008438_Adam21	5.81612	-0.93514	0.81108	-1.15296	0.248928	0.397568
ENSMUSG00000008450_Nutf2	35.7897	0.401686	0.445431	0.901791	0.367168	0.513038
ENSMUSG00000008461_Fut1	12.4984	-2.11463	0.685533	-3.08465	0.00203793	0.0202686
ENSMUSG00000008475_Arpc5	23.364	0.203353	0.497432	0.408806	0.682682	0.779509
ENSMUSG00000008482_Rnf151	1.21831	-0.442861	0.803933	-0.550868	0.581724	NA
ENSMUSG00000008489_Elavl2	42.7936	0.199065	0.402898	0.494084	0.621247	0.732218
ENSMUSG00000008496_Pou2f2	20.227	-1.49289	0.519687	-2.87267	0.00407021	0.0311836
ENSMUSG00000008540_Mgst1	17.9631	0.93111	0.565119	1.64763	0.0994277	0.216948
ENSMUSG00000008575_Nfib	350.268	0.708877	0.210605	3.36591	0.000762916	0.0112366
ENSMUSG00000008590_Htr3b	9.87263	-1.94222	0.751124	-2.58576	0.00971659	0.051962
ENSMUSG00000008601_Rab25	1.71203	-1.28415	0.833982	-1.53978	0.123613	NA
ENSMUSG00000008604_Ubqln4	69.2613	-0.0203285	0.324305	-0.0626834	0.950019	0.969124
ENSMUSG00000008658_Rbfox1	155.386	0.336905	0.230375	1.46242	0.143625	0.275992
ENSMUSG00000008668_Rps18	83.7688	0.541188	0.298292	1.81429	0.0696332	0.174128
ENSMUSG00000008682_Rpl10	79.4835	0.878	0.331419	2.64922	0.00806787	0.0465099
ENSMUSG00000008683_Rps15a	72.2752	0.0672988	0.325876	0.206517	0.836387	0.892601
ENSMUSG00000008690_Ncaph2	63.6461	0.141111	0.330379	0.42712	0.669292	0.768957
ENSMUSG00000008730_Hipk1	337.249	0.634452	0.192995	3.2874	0.00101118	0.0133475
ENSMUSG00000008734_Gprc5b	479.929	0.537155	0.183274	2.93088	0.00338001	0.0277043
ENSMUSG00000008763_Man1a2	321.858	0.447226	0.194595	2.29824	0.0215483	0.0835871
ENSMUSG00000008789_Ceacam5	4.48278	-1.16769	0.841407	-1.38779	0.165202	0.302525
ENSMUSG00000008822_Acyp1	23.303	0.498377	0.502487	0.991821	0.321285	0.469355
ENSMUSG00000008843_Cldn13	3.93032	-1.18861	0.833501	-1.42605	0.153854	0.289109
ENSMUSG00000008845_Cd163	10.8368	-0.916277	0.656332	-1.39606	0.162697	0.299599
ENSMUSG00000008855_Hdac5	104.099	0.456909	0.310718	1.47049	0.141429	0.273442
ENSMUSG00000008859_Rala	143.545	0.745322	0.238822	3.12083	0.00180343	0.0187904
ENSMUSG00000008874_Clec3a	1.33209	-1.18142	0.771635	-1.53106	0.125755	NA
ENSMUSG00000008892_Vdac3	195.187	0.813812	0.239292	3.40091	0.000671617	0.0103649
ENSMUSG00000008932_Slc1a7	2.8795	-1.73678	0.848503	-2.04687	0.0406706	0.124196
ENSMUSG00000008958_Vps72	69.6904	-0.447869	0.368093	-1.21673	0.223708	0.369359
ENSMUSG00000008976_Gabpa	149.253	0.551299	0.246232	2.23895	0.0251595	0.092505
ENSMUSG00000008999_Bmp7	12.6235	-1.81354	0.707752	-2.5624	0.0103953	0.0541479
ENSMUSG00000009013_Dynll1	148.348	0.65873	0.244794	2.69095	0.00712479	0.0430506
ENSMUSG00000009030_Pdcl	193.771	0.188326	0.226622	0.831013	0.405966	0.548891
ENSMUSG00000009035_Tmem184b	144.879	0.692876	0.272306	2.54448	0.0109442	0.0558164
ENSMUSG00000009047_Gm5965	0.588204	0.355094	0.611878	0.580334	0.561689	NA
ENSMUSG00000009070_Rsph14	6.29338	-1.7692	0.800195	-2.21096	0.0270387	0.0966565
ENSMUSG00000009073_Nf2	94.1715	0.263476	0.305504	0.862433	0.388449	0.532684
ENSMUSG00000009075_Cabp7	70.197	0.142328	0.318319	0.447124	0.654785	0.758282
ENSMUSG00000009076_Zmat5	4.57631	0.811486	0.796748	1.0185	0.308441	0.457339
ENSMUSG00000009079_Ewsr1	349.392	0.329488	0.185521	1.77601	0.0757308	0.183544
ENSMUSG00000009090_Ap1b1	198.156	0.599089	0.261389	2.29194	0.0219091	0.084602
ENSMUSG00000009092_Derl3	3.90352	-1.52141	0.830423	-1.83209	0.0669382	0.17014
ENSMUSG00000009097_Tbx1	4.59273	-1.17059	0.808859	-1.44722	0.147837	0.281614
ENSMUSG00000009108_Gnat2	2.7643	-0.673685	0.849125	-0.793387	0.427552	0.568082
ENSMUSG00000009112_Bcl2l13	73.6125	-0.0695541	0.318169	-0.218607	0.826956	0.885647
ENSMUSG00000009114_2610028H24Rik	0.374298	-0.139322	0.605133	-0.230233	0.817911	NA
ENSMUSG00000009115_Spatc1l	1.06232	-0.862033	0.762869	-1.12999	0.258481	NA
ENSMUSG00000009145_Dqx1	4.05402	-1.08203	0.830486	-1.30289	0.192612	0.334435
ENSMUSG00000009207_Lnp	124.368	0.0889483	0.284618	0.312519	0.754646	0.831991
ENSMUSG00000009210_Prr29	2.07001	-1.84059	0.833822	-2.20741	0.0272853	0.097192
ENSMUSG00000009214_Tmem8c	1.10434	-0.31708	0.787067	-0.402863	0.687049	NA
ENSMUSG00000009216_Fam163b	19.0314	-0.82451	0.540602	-1.52517	0.127216	0.254759
ENSMUSG00000009246_Trpm5	9.81626	-2.09548	0.758027	-2.76439	0.00570289	0.0380768
ENSMUSG00000009248_Ascl2	3.56689	-2.10559	0.840032	-2.50656	0.0121912	0.0592778
ENSMUSG00000009281_Rarres2	13.7736	-0.467677	0.611152	-0.765239	0.444129	0.583027
ENSMUSG00000009291_Pttg1ip	59.5777	0.539153	0.385153	1.39984	0.161561	0.298336
ENSMUSG00000009292_Trpm2	85.1612	0.0754298	0.28819	0.261736	0.793525	0.86138
ENSMUSG00000009293_Ube2g2	28.3594	0.31617	0.489652	0.645703	0.518471	0.648315
ENSMUSG00000009350_Mpo	9.7798	-2.66777	0.760748	-3.50677	0.000453583	0.0082344
ENSMUSG00000009356_Lpo	6.19279	-1.7219	0.79972	-2.15313	0.0313086	0.105847
ENSMUSG00000009376_Met	11.0664	-1.46532	0.699372	-2.0952	0.0361536	0.115369
ENSMUSG00000009378_Slc16a12	7.22423	-1.31632	0.71809	-1.83309	0.0667899	0.169846
ENSMUSG00000009394_Syn2	166.631	0.718631	0.240208	2.9917	0.00277426	0.0244631
ENSMUSG00000009406_Elk1	54.5638	0.449524	0.359272	1.25121	0.21086	0.354628
ENSMUSG00000009418_Nav1	197.956	0.172449	0.216179	0.797715	0.425036	0.565612
ENSMUSG00000009470_Tnpo1	220.103	0.863283	0.23973	3.60107	0.000316912	0.00663614
ENSMUSG00000009471_Myod1	4.14269	-1.72704	0.825328	-2.09255	0.036389	0.115791
ENSMUSG00000009487_Otog	10.3691	-3.19807	0.763976	-4.18608	2.84e-05	0.00151086
ENSMUSG00000009535_Rnmt	117.827	0.358476	0.263654	1.35965	0.173941	0.312874
ENSMUSG00000009545_Kcnq1	8.54088	-1.99334	0.743394	-2.68141	0.00733127	0.0439179
ENSMUSG00000009549_Srp14	178.35	0.805189	0.231563	3.47719	0.000506703	0.00878025
ENSMUSG00000009551_6330409D20Rik	1.73236	-0.319289	0.844488	-0.378086	0.705366	NA
ENSMUSG00000009555_Cdk9	51.5148	-0.151393	0.36566	-0.414027	0.678854	0.776577
ENSMUSG00000009563_Tor2a	18.3759	-0.861834	0.566748	-1.52067	0.128344	0.25634
ENSMUSG00000009566_Fpgs	11.4393	-1.02646	0.628393	-1.63346	0.102372	0.220942
ENSMUSG00000009569_Mkl2	133.238	0.769961	0.275697	2.79278	0.0052257	0.0362208
ENSMUSG00000009575_Cbx5	308.193	0.36981	0.204438	1.80891	0.0704652	0.175595
ENSMUSG00000009580_Odam	0.346988	-0.139322	0.605133	-0.230233	0.817911	NA
ENSMUSG00000009585_Apobec3	9.01034	-0.652985	0.727597	-0.897454	0.369476	0.515037
ENSMUSG00000009588_St6galnac1	10.6116	-2.9734	0.73544	-4.04302	5.28e-05	0.00227449
ENSMUSG00000009596_Taf7l	0.599811	-0.527023	0.609664	-0.864449	0.387341	NA
ENSMUSG00000009614_Sardh	20.7218	-0.192511	0.54988	-0.350097	0.726266	0.81119
ENSMUSG00000009621_Vav2	30.207	-0.39308	0.458996	-0.85639	0.391782	0.535548
ENSMUSG00000009628_Tex15	18.272	-1.40093	0.591501	-2.36843	0.0178637	0.0745592
ENSMUSG00000009630_Ppp2cb	108.95	0.876874	0.281421	3.11587	0.001834	0.0189813
ENSMUSG00000009633_G0s2	12.6106	0.60057	0.631475	0.951059	0.341574	0.488566
ENSMUSG00000009640_Dmap1	26.4872	-0.775729	0.473177	-1.6394	0.101129	0.219287
ENSMUSG00000009646_Pla2g12b	1.53376	-1.01065	0.80807	-1.2507	0.211045	NA
ENSMUSG00000009647_Mcu	39.3401	-0.0379498	0.411883	-0.0921373	0.926589	0.95393
ENSMUSG00000009654_Oit3	1.93603	-1.44722	0.839593	-1.72372	0.0847582	NA
ENSMUSG00000009681_Bcr	123.684	0.663486	0.264004	2.51316	0.0119654	0.0586967
ENSMUSG00000009687_Fxyd5	13.285	-1.36691	0.649202	-2.10552	0.0352457	0.113538
ENSMUSG00000009731_Kcnd1	19.4584	0.0892053	0.550156	0.162146	0.871191	0.9165
ENSMUSG00000009733_Tfcp2	24.6418	0.591317	0.527563	1.12085	0.262353	0.4112
ENSMUSG00000009734_Pou6f2	21.3636	-1.6628	0.644361	-2.58054	0.00986469	0.0524498
ENSMUSG00000009739_Pou6f1	54.4672	-0.327018	0.347487	-0.941094	0.346656	0.493756
ENSMUSG00000009741_Ubp1	87.588	0.51078	0.364203	1.40246	0.160779	0.297467
ENSMUSG00000009772_Nuak2	10.3389	-1.76075	0.689956	-2.55197	0.0107116	0.055103
ENSMUSG00000009828_Ick	73.115	-0.461287	0.353097	-1.30641	0.191415	0.333065
ENSMUSG00000009863_Sdhb	92.2334	0.786438	0.302113	2.60312	0.0092379	0.0505852
ENSMUSG00000009876_Cox4i2	4.16864	0.893292	0.8282	1.07859	0.280769	0.430499
ENSMUSG00000009894_Snap47	170.761	0.867624	0.274125	3.16507	0.00155047	0.0172326
ENSMUSG00000009900_Wnt3a	9.59136	-2.24792	0.752142	-2.98868	0.00280182	0.0245804
ENSMUSG00000009905_Kdsr	136.122	0.537621	0.257368	2.08892	0.036715	0.116277
ENSMUSG00000009907_Vps4b	90.7223	0.474419	0.287874	1.64801	0.0993511	0.216889
ENSMUSG00000009927_Rps25	27.4285	0.85693	0.538837	1.59033	0.11176	0.233514
ENSMUSG00000009941_Nxf2	0.374298	-0.139322	0.605133	-0.230233	0.817911	NA
ENSMUSG00000009995_Taz	49.8972	0.283273	0.379264	0.746902	0.455123	0.593194
ENSMUSG00000010021_Kif19a	3.71316	-1.31494	0.833203	-1.57818	0.114524	0.237521
ENSMUSG00000010025_Aldh3a2	58.7921	0.724362	0.337472	2.14643	0.0318385	0.106966
ENSMUSG00000010044_Zmynd10	1.13215	-1.02025	0.744551	-1.3703	0.170595	NA
ENSMUSG00000010045_Tmem115	28.4127	-0.0442928	0.468346	-0.0945728	0.924654	0.952469
ENSMUSG00000010047_Hyal2	15.9626	-0.588248	0.592104	-0.993487	0.320472	0.468656
ENSMUSG00000010048_Ifrd2	4.55096	0.367689	0.817579	0.449729	0.652906	0.756954
ENSMUSG00000010051_Hyal1	16.128	-0.595039	0.557141	-1.06802	0.285511	0.435056
ENSMUSG00000010054_Tusc2	55.2417	0.304803	0.38608	0.789481	0.429831	0.569995
ENSMUSG00000010057_Nprl2	14.5118	0.86736	0.626705	1.384	0.166358	0.303982
ENSMUSG00000010064_Slc38a3	33.5556	-0.174311	0.44338	-0.393142	0.694215	0.788662
ENSMUSG00000010066_Cacna2d2	575.481	0.737776	0.202976	3.6348	0.0002782	0.00614971
ENSMUSG00000010067_Rassf1	16.531	0.252202	0.575865	0.437953	0.66142	0.763339
ENSMUSG00000010080_Epn3	7.27569	-0.334413	0.735685	-0.454559	0.649426	0.754241
ENSMUSG00000010086_Rnf112	102.333	0.209392	0.275379	0.760379	0.447028	0.5857
ENSMUSG00000010095_Slc3a2	101.021	0.567809	0.311226	1.82443	0.0680875	0.17186
ENSMUSG00000010097_Nxf1	117.571	0.589334	0.30062	1.96039	0.0499501	0.141659
ENSMUSG00000010110_Stx5a	66.661	0.000567491	0.362451	0.00156571	0.998751	0.999138
ENSMUSG00000010122_Slc47a1	2.80495	-1.44414	0.847138	-1.70472	0.0882458	0.201612
ENSMUSG00000010142_Tnfrsf13b	6.28521	-1.50204	0.752341	-1.99649	0.0458806	0.134274
ENSMUSG00000010154_Spire2	12.2139	0.45563	0.654536	0.696111	0.48636	0.620176
ENSMUSG00000010175_Prox1	69.8711	0.0643662	0.330618	0.194684	0.84564	0.899093
ENSMUSG00000010205_Raver1	45.1513	0.383639	0.377734	1.01563	0.309804	0.458528
ENSMUSG00000010277_2610507B11Rik	397.082	0.730317	0.185721	3.93234	8.41e-05	0.00305921
ENSMUSG00000010290_AI597479	73.548	0.591058	0.337421	1.75169	0.0798269	0.189657
ENSMUSG00000010307_Tmem86a	5.56266	-0.341215	0.771529	-0.442258	0.658303	0.760829
ENSMUSG00000010311_Optc	6.7933	-2.15993	0.750826	-2.87675	0.00401799	0.0309858
ENSMUSG00000010342_Tex14	8.2711	-0.902538	0.701821	-1.28599	0.198445	0.341031
ENSMUSG00000010358_Ifi35	4.57758	-0.793428	0.787642	-1.00735	0.313769	0.46237
ENSMUSG00000010362_Rdm1	1.8919	-0.212119	0.837921	-0.253149	0.800153	NA
ENSMUSG00000010376_Nedd8	127.747	0.246124	0.25275	0.973785	0.330163	0.477749
ENSMUSG00000010392_Gosr1	79.3453	0.30487	0.307869	0.990261	0.322047	0.470141
ENSMUSG00000010406_Mrpl52	15.4935	0.340006	0.578848	0.587384	0.556946	0.680249
ENSMUSG00000010453_Kansl3	111.43	0.393533	0.271597	1.44896	0.147349	0.280935
ENSMUSG00000010461_Eya4	3.54741	-0.659315	0.84675	-0.778642	0.436191	0.575561
ENSMUSG00000010476_Ebf3	57.2751	0.111769	0.346335	0.322719	0.746908	0.825815
ENSMUSG00000010492_Uckl1os	13.9875	-1.20891	0.591889	-2.04245	0.0411065	0.125112
ENSMUSG00000010505_Myt1	144.479	0.10706	0.260569	0.410872	0.681167	0.778463
ENSMUSG00000010517_Faf1	80.3253	0.688452	0.321335	2.14248	0.0321553	0.107495
ENSMUSG00000010529_Gm266	8.30782	-0.454327	0.692075	-0.65647	0.511521	0.642238
ENSMUSG00000010538_Tsacc	1.00312	0.121182	0.783381	0.154691	0.877065	NA
ENSMUSG00000010554_Mettl16	128.574	-0.184294	0.247095	-0.745844	0.455762	0.593619
ENSMUSG00000010592_Dazl	8.23248	-2.27481	0.75344	-3.01923	0.00253419	0.0231039
ENSMUSG00000010601_Apol7a	6.91713	-1.89507	0.753441	-2.51522	0.011896	0.0585366
ENSMUSG00000010607_Pigyl	41.3385	0.040201	0.436539	0.0920902	0.926626	0.95393
ENSMUSG00000010608_Rbm25	863.661	-0.0740463	0.165478	-0.447468	0.654537	0.758029
ENSMUSG00000010609_Psen2	34.992	-0.332313	0.427127	-0.778021	0.436557	0.575897
ENSMUSG00000010651_Acaa1b	1.05604	-0.612166	0.735798	-0.831977	0.405422	NA
ENSMUSG00000010660_Plcd1	3.77424	0.38576	0.818146	0.471505	0.63728	0.744847
ENSMUSG00000010663_Fads1	98.2091	0.730946	0.298062	2.45233	0.0141934	0.0648027
ENSMUSG00000010721_Lmbr1	56.826	0.0470371	0.353273	0.133147	0.894078	0.931978
ENSMUSG00000010751_Tnfrsf22	17.6833	-2.14343	0.650633	-3.29437	0.000986412	0.0131713
ENSMUSG00000010755_Cars	54.9178	0.30022	0.346014	0.867654	0.385584	0.530106
ENSMUSG00000010760_Phlda2	1.07597	-0.997993	0.740252	-1.34818	0.177601	NA
ENSMUSG00000010796_Asz1	0.974108	-0.65083	0.754717	-0.862351	0.388495	NA
ENSMUSG00000010797_Wnt2	4.24141	-0.771794	0.842463	-0.916116	0.359606	0.505683
ENSMUSG00000010803_Gabra1	2113.05	0.708261	0.198216	3.57318	0.000352677	0.00705874
ENSMUSG00000010825_Grid2ip	279.995	0.408566	0.228989	1.78421	0.0743889	0.181587
ENSMUSG00000010830_Kdelr3	1.36038	-0.352016	0.828229	-0.425022	0.670821	NA
ENSMUSG00000010911_Apip	28.5958	0.505463	0.470749	1.07374	0.282939	0.432456
ENSMUSG00000010914_Pdhx	130.497	0.420529	0.263986	1.593	0.111161	0.23277
ENSMUSG00000010936_Vac14	34.4416	0.560653	0.434993	1.28888	0.19744	0.339941
ENSMUSG00000011008_Mcoln2	5.04478	-1.50484	0.836388	-1.79922	0.0719842	0.177904
ENSMUSG00000011034_Slc5a1	58.4727	0.33153	0.351524	0.943124	0.345618	0.492685
ENSMUSG00000011096_Akt1s1	21.0515	-0.387745	0.530532	-0.73086	0.464864	0.601711
ENSMUSG00000011114_Tbrg1	24.2296	0.011483	0.47737	0.0240548	0.980809	0.988389
ENSMUSG00000011118_Panx3	4.2122	-1.1011	0.843914	-1.30475	0.191979	0.333728
ENSMUSG00000011148_Adssl1	11.9099	0.571051	0.636193	0.897605	0.369396	0.514952
ENSMUSG00000011154_Cfap161	9.99653	0.113565	0.697611	0.162792	0.870682	0.916174
ENSMUSG00000011158_Brf1	34.6503	0.314084	0.434842	0.722294	0.470114	0.606378
ENSMUSG00000011171_Vipr2	19.0496	0.53445	0.543881	0.982659	0.325775	0.473843
ENSMUSG00000011179_Odc1	59.4368	1.00471	0.356465	2.81854	0.00482425	0.0343796
ENSMUSG00000011254_Thg1l	13.9738	-0.325975	0.580672	-0.561375	0.574542	0.695587
ENSMUSG00000011256_Adam19	41.6934	-0.699082	0.411703	-1.69803	0.0895028	0.203436
ENSMUSG00000011257_Pabpc4	31.619	0.522051	0.4453	1.17236	0.241053	0.388887
ENSMUSG00000011263_Exoc3l2	10.7621	-2.08604	0.727479	-2.86749	0.00413747	0.0314562
ENSMUSG00000011267_Zfp296	5.19481	-1.744	0.822051	-2.12153	0.0338774	0.110551
ENSMUSG00000011305_Plin5	2.34418	-0.989349	0.846828	-1.1683	0.242686	0.390667
ENSMUSG00000011306_Sugp1	54.9675	0.339535	0.375411	0.904434	0.365765	0.511631
ENSMUSG00000011350_Gm5893	5.12796	-2.25272	0.820981	-2.74394	0.00607064	0.0393396
ENSMUSG00000011382_Dhdh	32.4314	-0.397645	0.465096	-0.854973	0.392566	0.536271
ENSMUSG00000011427_Zfp790	47.8831	0.232372	0.365738	0.63535	0.5252	0.653438
ENSMUSG00000011463_Cpb1	4.03343	-0.724748	0.834555	-0.868424	0.385162	0.529667
ENSMUSG00000011486_Slc25a41	1.07597	-0.997993	0.740252	-1.34818	0.177601	NA
ENSMUSG00000011589_Fsd1	8.87554	0.237671	0.683693	0.347629	0.728119	0.812311
ENSMUSG00000011632_Pinlyp	0.537985	-0.470718	0.626119	-0.751802	0.45217	NA
ENSMUSG00000011658_Fuz	33.4128	-0.337652	0.414879	-0.813857	0.415727	0.557506
ENSMUSG00000011751_Sptbn4	266.081	0.306441	0.202733	1.51155	0.130649	0.259514
ENSMUSG00000011752_Pgam1	264.811	0.987547	0.231498	4.2659	1.99e-05	0.00122683
ENSMUSG00000011831_Evi5	149.551	0.5456	0.235428	2.31748	0.0204775	0.0809785
ENSMUSG00000011832_Evi5l	94.2026	0.136476	0.307197	0.444264	0.656852	0.759857
ENSMUSG00000011837_Snapc2	10.5425	0.458503	0.648762	0.706735	0.479731	0.61476
ENSMUSG00000011877_Git1	76.1699	0.495555	0.304808	1.62579	0.103994	0.223259
ENSMUSG00000011884_Gltp	14.9064	0.242492	0.58133	0.417133	0.676581	0.774526
ENSMUSG00000011958_Bnip2	65.2864	0.690054	0.336799	2.04886	0.0404758	0.123835
ENSMUSG00000011960_Ccnt1	119.522	0.0860943	0.265166	0.324681	0.745423	0.824932
ENSMUSG00000012017_Scarf2	1.07754	-0.772159	0.790153	-0.977227	0.328457	NA
ENSMUSG00000012042_4930579F01Rik	5.05794	-2.84399	0.824886	-3.44774	0.000565301	0.00940406
ENSMUSG00000012076_Brms1l	186.919	0.220087	0.216302	1.0175	0.308917	0.457756
ENSMUSG00000012114_Med15	73.4613	0.939841	0.343693	2.73453	0.00624687	0.0400318
ENSMUSG00000012117_Dhdds	46.723	0.336853	0.37826	0.890535	0.373179	0.518461
ENSMUSG00000012123_Aim1l	11.8304	-2.16913	0.698869	-3.10377	0.00191072	0.01953
ENSMUSG00000012126_Ubxn11	15.6461	-1.15886	0.591296	-1.95987	0.0500113	0.141739
ENSMUSG00000012187_Mogat1	3.73748	-0.998309	0.838498	-1.19059	0.233814	0.380524
ENSMUSG00000012211_Tex22	4.36045	-1.63897	0.835609	-1.96141	0.0498312	0.141424
ENSMUSG00000012282_Wnt8a	3.44229	-1.12915	0.843341	-1.33891	0.180601	0.320477
ENSMUSG00000012296_Tjap1	21.108	0.111318	0.543213	0.204925	0.837631	0.893521
ENSMUSG00000012350_Ehf	17.875	-1.5479	0.612163	-2.52857	0.0114528	0.0571621
ENSMUSG00000012396_Nanog	5.20383	-1.58226	0.811223	-1.95046	0.0511214	0.143749
ENSMUSG00000012405_Rpl15	109.161	0.478759	0.289217	1.65536	0.0978514	0.214997
ENSMUSG00000012422_Tmem167	108.927	0.327526	0.318418	1.0286	0.303666	0.452754
ENSMUSG00000012428_Steap4	11.7668	-2.48435	0.708978	-3.50412	0.000458117	0.00825506
ENSMUSG00000012429_Mplkip	28.1559	-0.0903591	0.480714	-0.187969	0.850901	0.902483
ENSMUSG00000012443_Kif11	7.89078	-0.72869	0.713741	-1.02094	0.307281	0.456116
ENSMUSG00000012483_Rpa3	6.27689	0.242891	0.749953	0.323875	0.746033	0.825201
ENSMUSG00000012519_Mlkl	4.57833	-1.08749	0.809508	-1.3434	0.179143	0.31881
ENSMUSG00000012520_Phox2b	6.92677	-2.25129	0.785746	-2.86516	0.00416797	0.0316323
ENSMUSG00000012535_Tnpo3	126.022	0.281722	0.255281	1.10357	0.269778	0.418593
ENSMUSG00000012609_Ttll5	754.05	0.373923	0.180887	2.06717	0.0387184	0.120413
ENSMUSG00000012640_Zfp715	45.6427	0.304496	0.390847	0.779067	0.43594	0.575349
ENSMUSG00000012705_Retn	4.13654	-1.43259	0.815613	-1.75646	0.0790103	0.188415
ENSMUSG00000012777_Acpt	1.0543	-1.00627	0.741916	-1.35632	0.174998	NA
ENSMUSG00000012819_Cdh23	23.4564	-1.73996	0.531063	-3.27636	0.00105154	0.0135885
ENSMUSG00000012848_Rps5	31.3004	1.15525	0.446986	2.58453	0.0097513	0.0520399
ENSMUSG00000012889_Podnl1	7.40199	-1.81459	0.758934	-2.39097	0.0168041	0.0718823
ENSMUSG00000013033_Adgrl1	272.004	0.72628	0.209304	3.46997	0.000520521	0.00895132
ENSMUSG00000013076_Amotl1	66.1174	-0.14962	0.327377	-0.457027	0.647652	0.752959
ENSMUSG00000013083_2200002J24Rik	1.11551	-0.41819	0.76618	-0.545811	0.585196	NA
ENSMUSG00000013089_Etv5	129.525	0.766326	0.253952	3.0176	0.00254789	0.0231725
ENSMUSG00000013091_Tmem190	0.624856	0.0578056	0.686413	0.084214	0.932886	NA
ENSMUSG00000013150_Gfod2	37.3815	-0.376482	0.400415	-0.940228	0.3471	0.494171
ENSMUSG00000013155_Enkd1	5.09818	-0.431421	0.781579	-0.551986	0.580958	0.700989
ENSMUSG00000013158_4933405L10Rik	2.99925	-1.21748	0.84628	-1.43863	0.150256	0.284584
ENSMUSG00000013160_Atp6v0d1	125.399	0.880096	0.255551	3.44392	0.000573351	0.00949542
ENSMUSG00000013236_Ptprs	289.139	0.856026	0.227439	3.76376	0.000167381	0.0045167
ENSMUSG00000013275_Slc41a1	79.9724	0.237723	0.307943	0.77197	0.440132	0.5794
ENSMUSG00000013338_Fer1l4	12.4849	-3.21468	0.71726	-4.48189	7.4e-06	0.000702288
ENSMUSG00000013353_4931406B18Rik	25.1512	-2.14873	0.56171	-3.82533	0.000130594	0.00390709
ENSMUSG00000013367_Iglon5	43.6084	-0.194714	0.391837	-0.496927	0.61924	0.730721
ENSMUSG00000013415_Igf2bp1	20.0958	-3.14121	0.626048	-5.01752	5.23e-07	0.00013873
ENSMUSG00000013418_B4galnt2	1.47914	-0.981426	0.804982	-1.21919	0.222772	NA
ENSMUSG00000013419_Zfp651	63.4665	-0.619408	0.358936	-1.72568	0.0844051	0.1961
ENSMUSG00000013465_Nelfb	33.3295	0.646121	0.449824	1.43639	0.150892	0.285327
ENSMUSG00000013483_Card14	5.7764	-1.45452	0.826644	-1.75955	0.0784836	0.187627
ENSMUSG00000013495_Tmem175	38.2127	0.365717	0.423758	0.863032	0.38812	0.532458
ENSMUSG00000013523_Bcas1	37.5256	0.118924	0.444003	0.267846	0.788818	0.857964
ENSMUSG00000013539_Tango2	54.3804	-0.571127	0.356077	-1.60394	0.108727	0.229833
ENSMUSG00000013562_4833413E03Rik	1.28516	-0.0105743	0.804571	-0.0131428	0.989514	NA
ENSMUSG00000013584_Aldh1a2	3.76554	0.423549	0.834386	0.507617	0.611722	0.72463
ENSMUSG00000013593_Ndufs2	191.72	0.875148	0.263991	3.31507	0.000916194	0.0126161
ENSMUSG00000013611_Snx31	2.3594	-0.92101	0.848913	-1.08493	0.277953	0.427162
ENSMUSG00000013622_Atraid	21.9106	1.18628	0.528691	2.2438	0.0248453	0.0918256
ENSMUSG00000013629_Cad	27.4986	0.190919	0.456361	0.418352	0.67569	0.773814
ENSMUSG00000013643_Lypd8	0.968464	-0.614051	0.749605	-0.819166	0.412692	NA
ENSMUSG00000013646_Sh3bp5l	59.1432	-0.147253	0.356492	-0.413062	0.679562	0.777179
ENSMUSG00000013653_1810065E05Rik	0.841027	0.000891585	0.69736	0.00127851	0.99898	NA
ENSMUSG00000013662_Atad1	119.048	0.966482	0.300502	3.21623	0.00129888	0.0154139
ENSMUSG00000013663_Pten	350.403	0.868936	0.223521	3.88749	0.000101288	0.00337095
ENSMUSG00000013668_4933402N03Rik	6.47554	-2.35538	0.796406	-2.95751	0.00310131	0.0263107
ENSMUSG00000013698_Pea15a	774.406	0.262698	0.229938	1.14247	0.253258	0.402071
ENSMUSG00000013701_Timm23	86.2633	0.504136	0.305399	1.65075	0.0987905	0.216269
ENSMUSG00000013707_Tnfaip8l2	2.94165	-0.889523	0.845716	-1.0518	0.292892	0.442259
ENSMUSG00000013736_Trnt1	111.431	0.728156	0.261253	2.78717	0.00531707	0.0366478
ENSMUSG00000013766_Ly6g6e	2.13201	-1.36362	0.834335	-1.63438	0.10218	0.220676
ENSMUSG00000013787_Ehmt2	78.4381	0.00638069	0.359506	0.0177485	0.985839	0.991484
ENSMUSG00000013822_Elof1	12.4777	0.408622	0.616642	0.662657	0.50755	0.639042
ENSMUSG00000013833_Med16	28.3978	-0.996874	0.51697	-1.9283	0.0538176	0.148342
ENSMUSG00000013846_St3gal1	20.5528	-1.89121	0.539604	-3.5048	0.000456942	0.00825506
ENSMUSG00000013858_Tmem259	53.5124	0.599543	0.368546	1.62678	0.103784	0.223073
ENSMUSG00000013878_Rnf170	91.536	0.52552	0.303563	1.73117	0.0834211	0.194602
ENSMUSG00000013921_Clip3	594.253	0.741731	0.220993	3.35636	0.000789769	0.0114879
ENSMUSG00000013928_Thap8	6.23904	-1.08901	0.747514	-1.45684	0.14516	0.277991
ENSMUSG00000013936_Myl2	0.427184	-0.430788	0.604654	-0.712454	0.476184	NA
ENSMUSG00000013973_Dedd	19.1688	0.193025	0.550179	0.350841	0.725708	0.810847
ENSMUSG00000013974_Mcemp1	5.27282	-0.322706	0.813839	-0.396523	0.69172	0.786797
ENSMUSG00000013997_Nit1	27.7293	0.478313	0.466401	1.02554	0.305108	0.45417
ENSMUSG00000014030_Pax5	17.221	-2.35177	0.607521	-3.8711	0.000108344	0.00352159
ENSMUSG00000014039_Prdm15	38.2325	-0.236997	0.39597	-0.598522	0.549491	0.674366
ENSMUSG00000014074_Rnf168	84.6486	0.286383	0.295947	0.967683	0.333203	0.480636
ENSMUSG00000014075_Tctex1d2	14.863	0.02734	0.634607	0.0430818	0.965636	0.979522
ENSMUSG00000014077_Chp1	64.9427	0.44364	0.340172	1.30416	0.192178	0.333973
ENSMUSG00000014104_Sval2	0.574235	-0.319799	0.673232	-0.475021	0.634772	NA
ENSMUSG00000014158_Trpv4	5.18155	-1.19295	0.819473	-1.45575	0.145462	0.278425
ENSMUSG00000014164_Klhl3	33.127	0.314849	0.43515	0.72354	0.469348	0.605753
ENSMUSG00000014177_Tvp23b	20.7695	0.32803	0.511196	0.641691	0.521074	0.650239
ENSMUSG00000014195_Dnajc7	314.409	0.617971	0.185699	3.32782	0.000875298	0.0122483
ENSMUSG00000014198_Zfp385c	113.72	0.519573	0.274938	1.88978	0.0587874	0.156768
ENSMUSG00000014226_Cacybp	207.712	0.616002	0.219215	2.81004	0.00495353	0.0349774
ENSMUSG00000014232_Cluap1	63.8705	0.522074	0.349801	1.49249	0.135571	0.26586
ENSMUSG00000014243_Zswim7	5.03382	0.0527597	0.782152	0.0674545	0.94622	0.966662
ENSMUSG00000014245_Pigl	8.58238	-0.174999	0.70394	-0.248599	0.803671	0.8686
ENSMUSG00000014294_Ndufa2	63.3734	0.906673	0.332592	2.72608	0.00640908	0.0405649
ENSMUSG00000014301_Pam16	21.9698	0.740965	0.521309	1.42135	0.155214	0.29046
ENSMUSG00000014303_Glis2	14.3687	-0.396905	0.6162	-0.644116	0.5195	0.649067
ENSMUSG00000014313_Cox6c	1008.89	0.939193	0.148877	6.30852	2.82e-10	6.65e-07
ENSMUSG00000014329_Bicc1	17.336	-1.34443	0.582133	-2.30949	0.0209166	0.0819618
ENSMUSG00000014349_Ube2z	58.7441	0.596653	0.347845	1.71528	0.0862937	0.198599
ENSMUSG00000014353_Tmem87b	70.735	0.985538	0.329014	2.99543	0.00274058	0.0242741
ENSMUSG00000014355_Anapc1	211.716	0.48191	0.221657	2.17413	0.0296956	0.102242
ENSMUSG00000014361_Mertk	72.1224	0.758553	0.321165	2.36188	0.0181824	0.0754501
ENSMUSG00000014402_Tsg101	79.0908	0.643543	0.331072	1.94382	0.0519176	0.144962
ENSMUSG00000014418_Hps5	44.564	-0.00740771	0.377947	-0.0195999	0.984363	0.990501
ENSMUSG00000014426_Map3k4	121.754	0.556955	0.273564	2.03592	0.0417583	0.126416
ENSMUSG00000014444_Piezo1	22.2268	-1.35527	0.556173	-2.43677	0.014819	0.0664025
ENSMUSG00000014453_Blk	1.74107	-0.810971	0.815296	-0.994695	0.319885	NA
ENSMUSG00000014470_Rnf166	31.9343	0.191426	0.451249	0.424214	0.67141	0.77065
ENSMUSG00000014496_Ankrd28	76.4786	0.580713	0.329184	1.7641	0.0777157	0.186516
ENSMUSG00000014498_Ankrd52	97.4408	0.382608	0.281094	1.36114	0.17347	0.312309
ENSMUSG00000014503_Pkd2l2	1.32959	0.345527	0.791972	0.436286	0.662629	NA
ENSMUSG00000014504_Srp19	58.8291	1.05917	0.372632	2.8424	0.00447759	0.0328683
ENSMUSG00000014529_Tmbim7	1.88639	-1.02232	0.838452	-1.21929	0.222733	NA
ENSMUSG00000014542_Clec4f	4.3114	-1.76015	0.827632	-2.12673	0.0334422	0.109686
ENSMUSG00000014543_Klra17	0.469713	-0.327785	0.606419	-0.540526	0.588834	NA
ENSMUSG00000014547_Wdfy2	8.44123	0.944389	0.719225	1.31306	0.189161	0.330824
ENSMUSG00000014550_Rbsn	119.336	-0.0560748	0.249377	-0.22486	0.822088	0.881872
ENSMUSG00000014551_Mrps25	186.9	0.621805	0.265804	2.33934	0.0193179	0.078079
ENSMUSG00000014554_Dguok	26.1871	0.359179	0.478253	0.751022	0.452639	0.590864
ENSMUSG00000014592_Camta1	388.233	0.560137	0.183641	3.05017	0.00228713	0.0217659
ENSMUSG00000014599_Csf1	22.4855	-1.44053	0.500264	-2.87954	0.00398262	0.0308173
ENSMUSG00000014601_Strip1	57.1952	0.456383	0.34384	1.32731	0.184405	0.325061
ENSMUSG00000014602_Kif1a	1343.9	0.807383	0.169379	4.76671	1.87e-06	0.000276272
ENSMUSG00000014603_Alx3	1.9319	-1.38082	0.841456	-1.64099	0.1008	NA
ENSMUSG00000014606_Slc25a11	36.816	0.465869	0.430203	1.08291	0.27885	0.428193
ENSMUSG00000014609_Chrne	2.76697	-2.07498	0.849233	-2.44336	0.0145512	0.0657044
ENSMUSG00000014633_Cmc2	11.3543	0.0319307	0.669018	0.0477277	0.961933	0.97707
ENSMUSG00000014668_Chfr	59.3769	0.248164	0.35464	0.699763	0.484075	0.618332
ENSMUSG00000014686_Ceacam16	1.02465	-0.441381	0.800606	-0.551309	0.581422	NA
ENSMUSG00000014704_Hoxa2	5.37545	-1.80075	0.832036	-2.16427	0.0304438	0.103823
ENSMUSG00000014725_Adam28	2.54741	-0.821123	0.846948	-0.969509	0.332291	0.479644
ENSMUSG00000014747_Ankrd53	4.19266	-0.223463	0.813637	-0.274647	0.783588	0.853684
ENSMUSG00000014748_Tex261	128.054	0.678544	0.269794	2.51505	0.0119016	0.0585441
ENSMUSG00000014763_Fam120b	115.99	0.73144	0.308322	2.37232	0.0176765	0.0741134
ENSMUSG00000014767_Tbp	100.341	-0.103877	0.270106	-0.384577	0.700551	0.793521
ENSMUSG00000014769_Psmb1	94.8839	1.00007	0.313707	3.1879	0.00143309	0.0164157
ENSMUSG00000014771_Pdcd2	11.854	1.08372	0.647563	1.67354	0.0942202	0.210221
ENSMUSG00000014773_Dll1	17.2382	-1.0352	0.546078	-1.8957	0.0579991	0.155211
ENSMUSG00000014776_Nol3	17.0506	-1.23121	0.56119	-2.19393	0.0282401	0.0992961
ENSMUSG00000014778_Fhod1	13.671	-2.67476	0.659128	-4.05803	4.95e-05	0.00218422
ENSMUSG00000014782_Plekhg4	9.28631	-0.721069	0.698976	-1.03161	0.302256	0.451043
ENSMUSG00000014786_Slc9a5	36.3408	-0.179985	0.422926	-0.425571	0.670421	0.769931
ENSMUSG00000014791_Elmo3	5.36724	0.45655	0.778673	0.586317	0.557662	0.68077
ENSMUSG00000014813_Stc1	11.5287	-2.72261	0.719423	-3.78443	0.00015406	0.00430019
ENSMUSG00000014837_4931428F04Rik	25.6481	-0.250653	0.481595	-0.520465	0.602739	0.717415
ENSMUSG00000014846_Tppp3	29.9719	0.647668	0.470455	1.37669	0.168609	0.306745
ENSMUSG00000014850_Msh3	87.8098	-0.122317	0.309868	-0.394738	0.693036	0.787913
ENSMUSG00000014852_Adamts13	3.48999	-1.45598	0.840185	-1.73293	0.0831084	0.194232
ENSMUSG00000014856_Tmem208	13.3615	0.386591	0.677307	0.570777	0.568151	0.689888
ENSMUSG00000014859_E2f4	44.3686	0.47647	0.410577	1.16049	0.245849	0.394089
ENSMUSG00000014867_Surf4	55.8572	0.691948	0.366103	1.89004	0.0587532	0.156726
ENSMUSG00000014873_Surf2	51.5276	-0.0809563	0.355332	-0.227833	0.819776	0.880478
ENSMUSG00000014905_Dnajb9	70.2418	1.01596	0.324867	3.1273	0.00176422	0.0186148
ENSMUSG00000014907_Naf1	25.2399	0.647215	0.476455	1.3584	0.174338	0.313369
ENSMUSG00000014932_Yes1	86.7895	0.511548	0.315953	1.61906	0.105433	0.225142
ENSMUSG00000014956_Ppp1cb	421.504	0.880608	0.198812	4.42935	9.45e-06	0.000779665
ENSMUSG00000014959_Gorasp2	64.7231	0.447893	0.333634	1.34247	0.179444	0.319126
ENSMUSG00000014980_Tsen15	38.4262	0.0426125	0.400911	0.106289	0.915353	0.94615
ENSMUSG00000015001_Oc90	2.63624	-1.68708	0.84886	-1.98747	0.0468706	0.135892
ENSMUSG00000015002_Efr3a	659.99	0.591096	0.225916	2.61645	0.00888504	0.0493825
ENSMUSG00000015013_Trappc2l	8.57095	1.15179	0.715671	1.60939	0.107531	0.228261
ENSMUSG00000015016_Acsf3	16.4464	0.131415	0.585813	0.224329	0.822502	0.882231
ENSMUSG00000015023_Ddx19a	64.5696	0.384767	0.386587	0.995294	0.319593	0.467806
ENSMUSG00000015027_Galns	4.81552	-0.0977313	0.785559	-0.12441	0.900991	0.93684
ENSMUSG00000015053_Gata2	11.9565	-1.50514	0.630586	-2.38689	0.0169917	0.0724659
ENSMUSG00000015083_C8g	1.38859	-0.0720787	0.827993	-0.0870523	0.93063	NA
ENSMUSG00000015085_Entpd2	9.97781	-1.00093	0.702796	-1.42422	0.154384	0.28963
ENSMUSG00000015087_Rabl6	282.254	0.497418	0.210667	2.36116	0.018218	0.0755614
ENSMUSG00000015090_Ptgds	29.3305	1.19738	0.495597	2.41604	0.0156904	0.0688731
ENSMUSG00000015092_Edf1	211.67	0.224233	0.321339	0.697808	0.485297	0.619127
ENSMUSG00000015093_Clic3	1.76995	-0.943997	0.835026	-1.1305	0.258265	NA
ENSMUSG00000015094_Npdc1	72.1035	0.664805	0.3271	2.03242	0.0421108	0.127105
ENSMUSG00000015095_Fbxw5	39.144	0.427668	0.434958	0.983239	0.32549	0.473508
ENSMUSG00000015112_Slc25a13	5.86003	-1.04487	0.76121	-1.37264	0.169865	0.30816
ENSMUSG00000015120_Ube2i	84.8904	0.247134	0.32485	0.760764	0.446798	0.585548
ENSMUSG00000015126_Tsr3	16.4368	0.136969	0.575114	0.238159	0.811757	0.874667
ENSMUSG00000015127_Unkl	40.0244	0.22578	0.434209	0.519981	0.603077	0.717654
ENSMUSG00000015133_Lrrk1	15.4947	-0.87826	0.58469	-1.50209	0.133073	0.262574
ENSMUSG00000015134_Aldh1a3	9.30685	-0.349295	0.703296	-0.496654	0.619433	0.730848
ENSMUSG00000015143_Actn1	24.1886	0.402572	0.498841	0.807013	0.419659	0.560885
ENSMUSG00000015149_Sirt2	74.293	0.334212	0.303249	1.1021	0.270416	0.419149
ENSMUSG00000015165_Hnrnpl	211.128	0.344423	0.232728	1.47994	0.13889	0.270071
ENSMUSG00000015176_Nolc1	117.627	0.0893021	0.281006	0.317794	0.750641	0.828735
ENSMUSG00000015189_Casd1	107.917	0.688502	0.275028	2.50339	0.0123011	0.0596342
ENSMUSG00000015202_Cnksr3	57.392	0.476082	0.360311	1.32131	0.186398	0.327592
ENSMUSG00000015214_Mtmr1	64.3653	0.822808	0.421275	1.95314	0.0508036	0.143202
ENSMUSG00000015217_Hmgb3	51.6723	-0.0872079	0.378547	-0.230376	0.8178	0.87916
ENSMUSG00000015222_Map2	1343.13	0.610299	0.151305	4.03358	5.49e-05	0.00233276
ENSMUSG00000015224_Cyp2j9	189.956	0.830463	0.262594	3.16254	0.001564	0.0173011
ENSMUSG00000015243_Abca1	201.562	0.469588	0.250414	1.87524	0.060759	0.159896
ENSMUSG00000015247_Nipsnap3b	2.15101	0.522455	0.832723	0.627405	0.530394	0.657965
ENSMUSG00000015289_Lage3	8.78831	-0.341985	0.706265	-0.484217	0.628232	0.737421
ENSMUSG00000015290_Ubl4a	43.735	0.982336	0.396257	2.47903	0.0131739	0.0623188
ENSMUSG00000015291_Gdi1	515.126	0.680793	0.201134	3.38478	0.00071235	0.0107431
ENSMUSG00000015305_Sash1	184.493	0.491518	0.229829	2.13862	0.0324663	0.108091
ENSMUSG00000015312_Gadd45b	5.14403	-0.0875349	0.789488	-0.110876	0.911715	0.943849
ENSMUSG00000015314_Slamf6	31.038	-1.94552	0.508211	-3.82818	0.000129096	0.00388876
ENSMUSG00000015316_Slamf1	17.0221	-1.58563	0.659278	-2.4051	0.0161679	0.0700166
ENSMUSG00000015335_Zdhhc12	8.9243	-1.66084	0.743649	-2.23337	0.0255248	0.0933594
ENSMUSG00000015337_Endog	6.05234	1.16404	0.79399	1.46606	0.142632	0.274905
ENSMUSG00000015340_Cybb	5.00045	-0.506812	0.810732	-0.62513	0.531886	0.659341
ENSMUSG00000015341_Golga7	78.8171	0.42044	0.305882	1.37452	0.169281	0.307577
ENSMUSG00000015342_Xk	67.9002	0.72386	0.335532	2.15735	0.0309781	0.105143
ENSMUSG00000015354_Pcolce2	8.7295	-0.934183	0.700853	-1.33292	0.182557	0.322861
ENSMUSG00000015355_Cd48	1.11501	0.137899	0.770095	0.179068	0.857884	NA
ENSMUSG00000015357_Clpx	81.7767	0.644101	0.318434	2.02272	0.0431022	0.129087
ENSMUSG00000015363_Trabd	30.3945	0.100766	0.441058	0.228463	0.819286	0.880121
ENSMUSG00000015365_Mov10l1	2.64424	-1.83026	0.849168	-2.15535	0.0311343	0.10541
ENSMUSG00000015377_Dennd6b	45.7655	-0.143784	0.388089	-0.370493	0.711015	0.800982
ENSMUSG00000015396_Cd83	6.83663	-0.441955	0.74134	-0.596157	0.55107	0.675626
ENSMUSG00000015401_Tmem27	0.427184	-0.430788	0.604654	-0.712454	0.476184	NA
ENSMUSG00000015405_Ace2	5.28705	-0.755829	0.788899	-0.95808	0.338022	0.485287
ENSMUSG00000015437_Gzmb	2.99719	-0.801386	0.848116	-0.944902	0.344709	0.491824
ENSMUSG00000015441_Gzmf	0.457789	-0.139322	0.605133	-0.230233	0.817911	NA
ENSMUSG00000015443_Gzmn	1.3594	-1.33771	0.792693	-1.68755	0.0914975	NA
ENSMUSG00000015451_C4a	3.06579	-1.69072	0.844791	-2.00135	0.045355	0.133359
ENSMUSG00000015452_Ager	2.96236	-1.6006	0.848774	-1.88578	0.0593245	0.157636
ENSMUSG00000015461_Atf6b	34.1746	-0.0367975	0.434491	-0.0846912	0.932507	0.957464
ENSMUSG00000015467_Egfl8	3.4564	-1.09234	0.843008	-1.29576	0.195057	0.337138
ENSMUSG00000015468_Notch4	14.013	-1.75211	0.638928	-2.74227	0.00610167	0.0394143
ENSMUSG00000015474_Ppt2	23.1618	0.191619	0.515264	0.371884	0.709979	0.800314
ENSMUSG00000015476_Prrt1	123.904	0.916918	0.307887	2.9781	0.00290042	0.0251607
ENSMUSG00000015478_Rnf5	55.5369	0.064201	0.406929	0.15777	0.874638	0.919036
ENSMUSG00000015484_Fam163a	14.2375	-2.29553	0.645547	-3.55594	0.000376624	0.00732246
ENSMUSG00000015488_Cacfd1	30.6965	0.212003	0.455582	0.465345	0.641685	0.748346
ENSMUSG00000015501_Hivep2	397.169	0.51484	0.191219	2.69241	0.00709381	0.0429337
ENSMUSG00000015519_2310057J18Rik	1.19571	-0.875009	0.798915	-1.09525	0.273409	NA
ENSMUSG00000015522_Arnt	100.872	0.190034	0.297962	0.637779	0.523618	0.652129
ENSMUSG00000015533_Itga2	2.96457	-1.1985	0.845513	-1.41748	0.156341	0.291787
ENSMUSG00000015536_Mocs2	79.3996	0.0980263	0.297645	0.329339	0.741899	0.822391
ENSMUSG00000015542_Nat9	13.9237	-0.529941	0.625746	-0.846895	0.397054	0.540351
ENSMUSG00000015568_Lpl	13.5035	-1.58108	0.635081	-2.48957	0.0127899	0.0612181
ENSMUSG00000015575_Atp6v0e	40.9642	-0.0987962	0.389549	-0.253617	0.799791	0.866188
ENSMUSG00000015579_Nkx2-5	2.1353	-1.02596	0.833267	-1.23125	0.218228	0.363231
ENSMUSG00000015597_Zfp318	186.24	0.229719	0.244706	0.938756	0.347856	0.494865
ENSMUSG00000015599_Ttbk1	85.6356	0.0442817	0.321007	0.137946	0.890283	0.929573
ENSMUSG00000015605_Srf	23.3857	0.0620045	0.49915	0.12422	0.901141	0.936959
ENSMUSG00000015619_Gata3	5.18512	-1.80704	0.794712	-2.27383	0.0229763	0.0871734
ENSMUSG00000015627_Gata5	5.94189	-1.46179	0.786368	-1.85892	0.0630386	0.163857
ENSMUSG00000015647_Lama5	8.78101	1.17752	0.702784	1.6755	0.0938362	0.209672
ENSMUSG00000015652_Steap1	1.96485	-1.79995	0.831566	-2.16453	0.0304236	NA
ENSMUSG00000015653_Steap2	481.504	0.620616	0.197971	3.13488	0.00171924	0.0183653
ENSMUSG00000015656_Hspa8	4859.36	0.902384	0.171248	5.26946	1.37e-07	6.67e-05
ENSMUSG00000015659_Serac1	43.8176	-0.174862	0.417123	-0.419209	0.675064	0.773303
ENSMUSG00000015665_Awat1	0.801481	-0.511046	0.725684	-0.704226	0.481292	NA
ENSMUSG00000015668_Pdzd11	35.4678	0.849533	0.427126	1.98895	0.0467065	0.135648
ENSMUSG00000015671_Psma2	53.7071	0.947154	0.419841	2.25598	0.0240717	0.0898002
ENSMUSG00000015672_Mrpl32	25.7611	0.439277	0.53125	0.826874	0.408309	0.550761
ENSMUSG00000015697_Setdb1	80.3503	0.439172	0.314611	1.39592	0.162738	0.299653
ENSMUSG00000015702_Anxa9	5.92184	-1.23265	0.765256	-1.61077	0.107229	0.227895
ENSMUSG00000015709_Arnt2	100.557	0.421101	0.296744	1.41907	0.155879	0.291366
ENSMUSG00000015711_Prune	29.8606	0.00971083	0.438225	0.0221595	0.982321	0.989333
ENSMUSG00000015714_Cers2	30.4408	-0.349458	0.432865	-0.807315	0.419485	0.56075
ENSMUSG00000015721_Nlrp5	12.6997	-2.26013	0.745638	-3.03114	0.00243633	0.0226423
ENSMUSG00000015733_Capza2	283.856	0.680562	0.208748	3.26021	0.00111331	0.0139944
ENSMUSG00000015745_Plekho1	59.0599	0.4032	0.375968	1.07243	0.283527	0.433191
ENSMUSG00000015747_Vps45	42.116	0.601657	0.421039	1.42898	0.15301	0.288066
ENSMUSG00000015748_Prpf3	66.1193	-0.175112	0.316384	-0.553478	0.579936	0.700115
ENSMUSG00000015749_Anp32e	215.538	-0.0206145	0.217174	-0.0949218	0.924377	0.952296
ENSMUSG00000015750_Aph1a	28.3105	-0.823936	0.469813	-1.75375	0.0794731	0.189134
ENSMUSG00000015755_Tab2	141.74	0.584239	0.237994	2.45485	0.0140945	0.0644995
ENSMUSG00000015757_Ppil4	132.285	0.439986	0.261113	1.68504	0.0919801	0.207246
ENSMUSG00000015759_Cnih1	49.4285	0.650216	0.381891	1.70262	0.0886389	0.202117
ENSMUSG00000015766_Eps8	235.236	0.576671	0.210661	2.73744	0.00619199	0.0398284
ENSMUSG00000015776_Med22	30.5139	-0.193155	0.492627	-0.392091	0.694991	0.78912
ENSMUSG00000015787_Abo	3.04429	-1.42869	0.847305	-1.68616	0.0917648	0.206815
ENSMUSG00000015790_Surf1	30.6185	0.366108	0.46188	0.792648	0.427983	0.568391
ENSMUSG00000015804_Med28	90.9531	0.436644	0.302831	1.44187	0.149339	0.283454
ENSMUSG00000015806_Qdpr	56.0796	0.317283	0.385633	0.82276	0.410644	0.553132
ENSMUSG00000015812_Gnrh1	0.580831	0.401827	0.644589	0.623385	0.533032	NA
ENSMUSG00000015829_Tnr	298.387	0.472731	0.20573	2.29783	0.0215717	0.0836403
ENSMUSG00000015837_Sqstm1	157.071	0.807817	0.258813	3.12123	0.00180097	0.0187799
ENSMUSG00000015839_Nfe2l2	33.799	0.542629	0.434677	1.24835	0.211903	0.355626
ENSMUSG00000015843_Rxrg	2.76572	-1.17053	0.849078	-1.37859	0.168021	0.306054
ENSMUSG00000015846_Rxra	29.6483	-0.164805	0.46676	-0.353083	0.724026	0.809844
ENSMUSG00000015850_Adamtsl4	9.40757	-1.37756	0.707591	-1.94684	0.0515544	0.144489
ENSMUSG00000015852_Fcrls	5.49692	-1.4563	0.776337	-1.87587	0.0606738	0.159799
ENSMUSG00000015854_Cd5l	5.80591	-0.793111	0.795619	-0.996847	0.318839	0.466972
ENSMUSG00000015869_Prpsap1	52.4614	0.456775	0.369738	1.2354	0.216681	0.361425
ENSMUSG00000015879_Fam184b	98.8234	0.128683	0.286713	0.448823	0.653559	0.757406
ENSMUSG00000015880_Ncapg	7.57365	-0.944722	0.724218	-1.30447	0.192073	0.333814
ENSMUSG00000015882_Lcorl	76.0355	-0.134787	0.33536	-0.401918	0.687744	0.783877
ENSMUSG00000015889_Lta4h	55.274	0.753834	0.361734	2.08394	0.0371652	0.117222
ENSMUSG00000015890_Amdhd1	1.36536	-0.297212	0.813524	-0.365339	0.714858	NA
ENSMUSG00000015932_Dstn	183.2	0.846759	0.252819	3.34928	0.000810233	0.0116657
ENSMUSG00000015937_H2afy	141.486	0.141612	0.25572	0.553777	0.579731	0.699967
ENSMUSG00000015942_Gtf2ird2	35.6272	-0.144776	0.415326	-0.348583	0.727402	0.812058
ENSMUSG00000015943_Bola1	15.2648	-0.19198	0.600762	-0.31956	0.749302	0.827823
ENSMUSG00000015944_Gatsl2	113.193	0.402609	0.297073	1.35525	0.175337	0.314246
ENSMUSG00000015947_Fcgr1	5.40821	-0.284089	0.786694	-0.361118	0.718011	0.805599
ENSMUSG00000015950_Ncf1	8.1349	-1.4697	0.724096	-2.02971	0.0423865	0.127535
ENSMUSG00000015957_Wnt11	4.17925	-1.07688	0.844577	-1.27506	0.20229	0.345271
ENSMUSG00000015961_Adss	131.242	0.660884	0.263351	2.50952	0.0120896	0.0589731
ENSMUSG00000015966_Il17rb	9.87444	-0.864565	0.663621	-1.3028	0.192644	0.334467
ENSMUSG00000015968_Cacna1d	108.583	0.508014	0.275888	1.84138	0.0655666	0.168076
ENSMUSG00000015970_Chdh	16.4064	-0.929097	0.557977	-1.66512	0.0958894	0.212677
ENSMUSG00000015971_Actr8	51.0489	0.641644	0.372615	1.722	0.0850689	0.196968
ENSMUSG00000015980_Lrrc27	10.0971	-0.472049	0.674011	-0.700358	0.483704	0.618005
ENSMUSG00000015981_Stk32c	3.97854	-1.51088	0.838853	-1.80113	0.0716823	0.177446
ENSMUSG00000015994_Fnta	91.0579	0.396524	0.294356	1.34709	0.177952	0.317412
ENSMUSG00000016018_Skiv2l2	156.433	0.860293	0.26193	3.28444	0.00102184	0.0134161
ENSMUSG00000016024_Lbp	8.27178	-2.49909	0.780015	-3.20391	0.00135576	0.0158399
ENSMUSG00000016028_Celsr1	8.66262	-1.17097	0.738141	-1.58638	0.112654	0.234849
ENSMUSG00000016087_Fli1	6.81725	-1.4535	0.770062	-1.88751	0.0590916	0.157336
ENSMUSG00000016128_Stard13	58.2475	0.0239845	0.33279	0.0720708	0.942546	0.964312
ENSMUSG00000016150_Tenm1	272.929	0.898339	0.255842	3.51131	0.000445908	0.00813933
ENSMUSG00000016179_Camk1g	13.0144	-0.122575	0.610969	-0.200624	0.840993	0.896071
ENSMUSG00000016181_Diexf	35.6435	0.337073	0.415234	0.811767	0.416925	0.55859
ENSMUSG00000016194_Hsd11b1	99.0709	0.762594	0.30017	2.54054	0.0110681	0.0560587
ENSMUSG00000016200_Syt14	116.983	0.150704	0.284935	0.528908	0.596869	0.712764
ENSMUSG00000016206_H2-M3	2.22037	-0.722605	0.84855	-0.851577	0.394449	0.538033
ENSMUSG00000016239_Lonrf3	33.9919	0.0851324	0.420019	0.202687	0.83938	0.894795
ENSMUSG00000016252_Atp5e	30.4189	0.0745557	0.438164	0.170155	0.864888	0.911898
ENSMUSG00000016253_Nelfcd	29.2339	0.292364	0.455562	0.641767	0.521025	0.650239
ENSMUSG00000016255_Tubb1	1.66716	-0.707933	0.828606	-0.854367	0.392902	NA
ENSMUSG00000016256_Ctsz	20.4729	0.118025	0.523399	0.225497	0.821593	0.881659
ENSMUSG00000016257_Slmo2	39.9119	0.669354	0.401794	1.66591	0.0957305	0.212507
ENSMUSG00000016262_Sertad4	17.3349	-0.613734	0.554951	-1.10593	0.268759	0.417589
ENSMUSG00000016283_H2-M2	6.38732	-0.788114	0.769245	-1.02453	0.305586	0.45466
ENSMUSG00000016308_Ube2a	34.2182	1.05774	0.449511	2.3531	0.0186178	0.0766827
ENSMUSG00000016319_Slc25a5	156.505	0.97632	0.304034	3.21122	0.00132171	0.0156108
ENSMUSG00000016327_Atp1b4	7.88347	-2.7712	0.764789	-3.62349	0.00029066	0.0062747
ENSMUSG00000016344_Ppdpf	29.9586	1.19275	0.482812	2.47041	0.0134957	0.06317
ENSMUSG00000016346_Kcnq2	211.928	-0.0355587	0.207571	-0.171309	0.863981	0.911164
ENSMUSG00000016349_Eef1a2	872.703	0.925868	0.175713	5.26921	1.37e-07	6.67e-05
ENSMUSG00000016356_Col20a1	2.03165	-0.25919	0.847976	-0.305657	0.759866	0.835561
ENSMUSG00000016382_Pls3	294.973	0.920066	0.20684	4.4482	8.66e-06	0.000749049
ENSMUSG00000016386_Mpped2	21.0661	0.248409	0.528723	0.469829	0.638478	0.745977
ENSMUSG00000016409_Nkap	47.1317	0.542362	0.375974	1.44255	0.149147	0.28322
ENSMUSG00000016427_Ndufa1	53.2993	0.891503	0.365165	2.44137	0.0146318	0.0659412
ENSMUSG00000016458_Wt1	6.39578	-1.20286	0.788895	-1.52474	0.127323	0.254873
ENSMUSG00000016477_E2f3	28.4688	-0.151166	0.454466	-0.332624	0.739418	0.820637
ENSMUSG00000016481_Cr1l	68.3314	-0.0934184	0.347462	-0.268859	0.788038	0.857266
ENSMUSG00000016487_Ppfibp1	38.729	-1.39498	0.446903	-3.12143	0.00179976	0.0187782
ENSMUSG00000016493_Cd46	32.5853	-0.014684	0.459462	-0.031959	0.974505	0.984533
ENSMUSG00000016494_Cd34	35.6592	-2.0071	0.495828	-4.04798	5.17e-05	0.00224796
ENSMUSG00000016495_Plgrkt	25.9065	0.22385	0.513541	0.435895	0.662913	0.764472
ENSMUSG00000016496_Cd274	9.14917	-1.69692	0.720972	-2.35366	0.0185896	0.0766827
ENSMUSG00000016498_Pdcd1lg2	4.2356	-0.93297	0.844244	-1.1051	0.269118	0.417972
ENSMUSG00000016503_Gtf3a	14.598	0.303152	0.585933	0.517383	0.604889	0.719209
ENSMUSG00000016510_Mtif3	42.7435	-0.0786244	0.404567	-0.194342	0.845908	0.899181
ENSMUSG00000016520_Lnx2	31.2308	0.395413	0.445159	0.888251	0.374406	0.519636
ENSMUSG00000016524_Il19	0.356568	0.233822	0.608476	0.384274	0.700775	NA
ENSMUSG00000016526_Dyrk3	18.0671	-0.255212	0.566851	-0.450227	0.652547	0.756694
ENSMUSG00000016528_Mapkapk2	55.7331	0.66593	0.363427	1.83236	0.0668979	0.170087
ENSMUSG00000016529_Il10	0.521349	0.0204257	0.620451	0.0329207	0.973738	NA
ENSMUSG00000016534_Lamp2	157.428	0.509473	0.324087	1.57202	0.115945	0.239257
ENSMUSG00000016541_Atxn10	176.929	0.763745	0.300839	2.53872	0.0111259	0.0561314
ENSMUSG00000016552_Foxred2	32.8625	-0.455746	0.420065	-1.08494	0.277948	0.427162
ENSMUSG00000016554_Eif3d	106.56	0.766082	0.30479	2.51348	0.0119547	0.0586839
ENSMUSG00000016559_H3f3b	213.003	0.725528	0.222584	3.25957	0.0011158	0.0140112
ENSMUSG00000016619_Nup50	99.6053	0.12767	0.277983	0.459274	0.646037	0.751624
ENSMUSG00000016624_Phf21b	25.5261	-0.254697	0.467864	-0.544381	0.586179	0.704785
ENSMUSG00000016626_Nlrp14	3.30761	-1.76228	0.846715	-2.08132	0.0374049	0.117732
ENSMUSG00000016637_Ift27	39.7906	0.686944	0.397713	1.72723	0.0841258	0.195732
ENSMUSG00000016664_Pacsin2	115.977	0.296849	0.290231	1.0228	0.306402	0.455203
ENSMUSG00000016756_Cmah	26.3628	-1.83754	0.606036	-3.03207	0.00242886	0.0226066
ENSMUSG00000016757_Ttll12	16.9634	0.322611	0.60329	0.534753	0.592821	0.709829
ENSMUSG00000016758_Bik	1.40303	-0.630296	0.795829	-0.791999	0.428361	NA
ENSMUSG00000016763_Scube1	16.7258	-1.34066	0.588567	-2.27783	0.0227367	0.0865328
ENSMUSG00000016831_Tox4	78.848	0.417622	0.33406	1.25014	0.211248	0.354947
ENSMUSG00000016833_Mrps18c	20.0137	0.848355	0.536878	1.58016	0.11407	0.236913
ENSMUSG00000016918_Sulf1	106.361	0.219887	0.287541	0.764715	0.444442	0.583348
ENSMUSG00000016921_Srsf6	120.415	0.53272	0.282607	1.88502	0.0594267	0.157718
ENSMUSG00000016933_Plcg1	168.122	-0.0033536	0.235213	-0.0142577	0.988624	0.993047
ENSMUSG00000016940_Kctd2	75.2971	0.8471	0.330955	2.55956	0.0104805	0.0543474
ENSMUSG00000016942_Tmprss6	1.11501	0.137899	0.770095	0.179068	0.857884	NA
ENSMUSG00000016946_Kctd5	66.6607	0.125959	0.358218	0.351627	0.725118	0.81052
ENSMUSG00000016982_Pom121l2	7.64479	-1.16008	0.781282	-1.48484	0.137587	0.268585
ENSMUSG00000016984_Etaa1	36.6245	0.49065	0.437681	1.12102	0.262279	0.411156
ENSMUSG00000016995_Matn4	22.1819	-1.98424	0.588477	-3.37182	0.000746746	0.011087
ENSMUSG00000016998_Svs4	0.828791	-0.459075	0.698506	-0.657224	0.511037	NA
ENSMUSG00000017002_Slpi	0.68174	-0.583703	0.630822	-0.925306	0.354807	NA
ENSMUSG00000017003_Svs3a	0.599811	-0.527023	0.609664	-0.864449	0.387341	NA
ENSMUSG00000017004_Svs5	2.03706	-1.38333	0.841356	-1.64417	0.10014	0.217875
ENSMUSG00000017007_Rbpjl	17.8068	-2.73322	0.624258	-4.37834	1.2e-05	0.000903519
ENSMUSG00000017009_Sdc4	214.858	0.359596	0.218405	1.64647	0.0996678	0.217213
ENSMUSG00000017049_Ccdc70	2.5278	-1.4415	0.848799	-1.69828	0.0894543	0.203383
ENSMUSG00000017057_Il13ra1	4.05294	-1.05696	0.808641	-1.30708	0.191185	0.332886
ENSMUSG00000017064_Prl5a1	2.42171	-1.84191	0.846928	-2.17481	0.0296444	0.102157
ENSMUSG00000017119_Nbr1	352.554	0.735169	0.18776	3.91547	9.02e-05	0.00316524
ENSMUSG00000017132_Cyth1	89.0445	-0.0966096	0.320123	-0.301789	0.762813	0.838021
ENSMUSG00000017144_Rnd3	11.5608	-0.622296	0.702834	-0.885411	0.375935	0.52117
ENSMUSG00000017146_Brca1	29.6554	-1.25998	0.560856	-2.24653	0.0246698	0.0913322
ENSMUSG00000017167_Cntnap1	109.53	0.864724	0.289586	2.98607	0.0028259	0.0247161
ENSMUSG00000017176_Nt5c3b	38.6687	0.598397	0.428907	1.39517	0.162965	0.299916
ENSMUSG00000017188_Coa3	14.7514	1.06329	0.594379	1.7889	0.0736302	0.1804
ENSMUSG00000017195_Zpbp2	2.14017	-0.671693	0.848046	-0.792048	0.428333	0.56868
ENSMUSG00000017204_Gsdma	1.62289	-1.22136	0.83102	-1.46971	0.141641	NA
ENSMUSG00000017210_Med24	54.8331	0.545811	0.362453	1.50588	0.132097	0.26143
ENSMUSG00000017211_Gsdma2	5.34585	-1.85145	0.805722	-2.29788	0.0215686	0.0836403
ENSMUSG00000017221_Psmd3	72.2981	0.586197	0.345496	1.69668	0.0897568	0.203802
ENSMUSG00000017264_Exosc10	54.225	0.372573	0.347957	1.07075	0.284284	0.433799
ENSMUSG00000017286_Glod4	49.0989	0.875085	0.366671	2.38657	0.0170064	0.0725061
ENSMUSG00000017288_Vps53	76.9408	0.384312	0.313291	1.22669	0.219938	0.365181
ENSMUSG00000017291_Taok1	904.96	0.676048	0.169045	3.99922	6.36e-05	0.00254692
ENSMUSG00000017299_Dnttip1	17.4586	0.595456	0.589501	1.0101	0.312446	0.460936
ENSMUSG00000017300_Tnnc2	0.43378	0.279139	0.609871	0.457702	0.647166	NA
ENSMUSG00000017307_Acot8	9.1146	-0.520269	0.671411	-0.774888	0.438406	0.577789
ENSMUSG00000017309_Cd300lg	9.52638	-1.19584	0.69698	-1.71574	0.0862088	0.198433
ENSMUSG00000017311_Pyy	1.51383	-0.683923	0.802634	-0.852099	0.394159	NA
ENSMUSG00000017314_Mpp2	29.1734	0.116088	0.467082	0.248539	0.803717	0.868609
ENSMUSG00000017344_Vtn	19.2663	0.389658	0.587103	0.663697	0.506884	0.638309
ENSMUSG00000017376_Nlk	109.178	0.257505	0.301391	0.854387	0.39289	0.536608
ENSMUSG00000017386_Traf4	31.083	0.0140635	0.432385	0.0325254	0.974053	0.984421
ENSMUSG00000017390_Aldoc	3085.16	1.04628	0.20806	5.02874	4.94e-07	0.000132784
ENSMUSG00000017400_Stac2	23.0349	0.214794	0.525532	0.408718	0.682747	0.779509
ENSMUSG00000017404_Rpl19	191.26	0.643818	0.235238	2.73688	0.0062025	0.0398703
ENSMUSG00000017405_Nek8	9.68895	0.333273	0.683182	0.487825	0.625674	0.735757
ENSMUSG00000017412_Cacnb4	681.024	0.792643	0.197559	4.01218	6.02e-05	0.00246164
ENSMUSG00000017417_Plxdc1	117.221	0.954733	0.306958	3.1103	0.00186897	0.0192558
ENSMUSG00000017418_Arl5b	56.1628	-0.0582576	0.339721	-0.171486	0.863841	0.911129
ENSMUSG00000017421_Zfp207	308.592	0.69763	0.246769	2.82705	0.00469784	0.033913
ENSMUSG00000017428_Psmd11	102.793	0.3169	0.278144	1.13934	0.254561	0.40337
ENSMUSG00000017446_C1qtnf1	10.7776	-3.5152	0.771021	-4.55915	5.14e-06	0.000533488
ENSMUSG00000017453_Pipox	5.80866	-0.265963	0.750117	-0.354562	0.722918	0.808849
ENSMUSG00000017466_Timp2	26.8912	-0.603639	0.496806	-1.21504	0.22435	0.369962
ENSMUSG00000017478_Zc3h18	116.173	-0.392289	0.315732	-1.24248	0.214061	0.358281
ENSMUSG00000017485_Top2b	581.194	0.652753	0.1691	3.86015	0.000113318	0.00360316
ENSMUSG00000017491_Rarb	20.1387	0.797408	0.525463	1.51753	0.129132	0.257417
ENSMUSG00000017493_Igfbp4	12.8352	-1.58017	0.641549	-2.46305	0.0137759	0.0638334
ENSMUSG00000017499_Cdc6	9.90335	-1.80516	0.736745	-2.45018	0.0142785	0.0650242
ENSMUSG00000017548_Suz12	121.794	0.730493	0.289745	2.52116	0.0116968	0.0578655
ENSMUSG00000017550_Atad5	39.0257	0.276357	0.400322	0.690336	0.489983	0.623227
ENSMUSG00000017561_Crlf3	47.8437	0.33098	0.367173	0.90143	0.36736	0.513167
ENSMUSG00000017588_Krt27	2.57441	-1.66547	0.848819	-1.9621	0.0497504	0.141232
ENSMUSG00000017607_Tns4	10.112	-1.98122	0.6865	-2.88597	0.00390208	0.0304742
ENSMUSG00000017615_Tnfaip1	39.8634	0.107187	0.410381	0.26119	0.793946	0.86166
ENSMUSG00000017631_Abr	413.98	0.70284	0.218116	3.22233	0.00127154	0.0152202
ENSMUSG00000017639_Rab11fip4	532.406	0.406275	0.180403	2.25205	0.0243194	0.0904676
ENSMUSG00000017652_Cd40	8.89634	-2.82292	0.74327	-3.79798	0.00014588	0.00420563
ENSMUSG00000017664_Slc35c2	38.8569	-0.515642	0.411966	-1.25166	0.210693	0.354482
ENSMUSG00000017667_Zfp334	65.6481	-0.119371	0.326445	-0.365669	0.714612	0.803491
ENSMUSG00000017670_Elmo2	268.895	0.845912	0.214214	3.94892	7.85e-05	0.00291646
ENSMUSG00000017677_Wsb1	73.3254	0.571455	0.330775	1.72762	0.0840556	0.195617
ENSMUSG00000017679_Ttpal	67.0603	0.259904	0.325888	0.797525	0.425146	0.565729
ENSMUSG00000017686_Rhot1	128.068	0.792788	0.254198	3.11878	0.00181603	0.0188684
ENSMUSG00000017688_Hnf4g	2.03469	-1.66119	0.841841	-1.97328	0.0484635	0.139015
ENSMUSG00000017692_Rhbdl3	20.0514	-1.0669	0.549055	-1.94316	0.0519971	0.145076
ENSMUSG00000017697_Ada	2.03416	-0.848826	0.838849	-1.01189	0.311589	0.460156
ENSMUSG00000017707_Serinc3	158.471	0.847695	0.262506	3.22924	0.00124119	0.0150099
ENSMUSG00000017713_Tha1	9.93536	-1.59672	0.699744	-2.28187	0.0224973	0.0860278
ENSMUSG00000017715_Pgs1	31.3359	0.172261	0.443068	0.388791	0.697431	0.791028
ENSMUSG00000017716_Birc5	11.712	-1.62746	0.681544	-2.3879	0.0169449	0.0723139
ENSMUSG00000017718_Afmid	4.47445	-1.89693	0.833478	-2.27593	0.0228505	0.0868685
ENSMUSG00000017720_Trp53tg5	2.21941	-1.97601	0.839777	-2.35301	0.018622	0.0766827
ENSMUSG00000017721_Pigt	114.546	0.756527	0.293432	2.5782	0.0099317	0.0527084
ENSMUSG00000017724_Etv4	20.8976	0.441797	0.56635	0.780078	0.435345	0.574857
ENSMUSG00000017734_Dbndd2	244.333	0.464673	0.225531	2.06035	0.039365	0.121706
ENSMUSG00000017737_Mmp9	5.36185	-1.32526	0.781144	-1.69656	0.0897801	0.203815
ENSMUSG00000017740_Slc12a5	994.353	0.559741	0.170789	3.27738	0.00104776	0.01356
ENSMUSG00000017747_Ghdc	15.6693	-0.674099	0.562115	-1.19922	0.230442	0.376673
ENSMUSG00000017754_Pltp	60.1569	1.07392	0.364452	2.94666	0.00321224	0.0268649
ENSMUSG00000017756_Slc12a7	10.3403	-2.46918	0.70205	-3.5171	0.000436291	0.00801706
ENSMUSG00000017760_Ctsa	61.8581	0.345692	0.344993	1.00203	0.31633	0.464792
ENSMUSG00000017764_Zswim1	19.9205	-0.0725367	0.516598	-0.140412	0.888334	0.928278
ENSMUSG00000017765_Slc12a4	49.7135	0.861325	0.377409	2.28221	0.022477	0.0860002
ENSMUSG00000017767_Spata25	1.78658	-1.69471	0.825395	-2.05321	0.0400524	NA
ENSMUSG00000017774_Myo1c	17.1952	0.185868	0.552158	0.336621	0.736403	0.81851
ENSMUSG00000017776_Crk	153.881	0.661135	0.26743	2.47217	0.0134294	0.0629737
ENSMUSG00000017778_Cox7c	112.678	0.727756	0.279915	2.59992	0.00932458	0.050843
ENSMUSG00000017781_Pitpna	299.404	0.564021	0.193845	2.90965	0.00361836	0.0289503
ENSMUSG00000017801_Mlx	21.0575	0.36608	0.520953	0.702712	0.482235	0.616774
ENSMUSG00000017802_Fam134c	52.6442	0.489335	0.388309	1.26017	0.207608	0.350928
ENSMUSG00000017817_Jph2	4.42849	-1.64728	0.823536	-2.00025	0.0454729	0.133492
ENSMUSG00000017830_Dhx58	7.6368	-0.89128	0.736107	-1.2108	0.225972	0.371803
ENSMUSG00000017831_Rab5a	199.302	0.254414	0.238085	1.06859	0.285256	0.434719
ENSMUSG00000017837_Nkiras2	33.7425	0.0617083	0.451876	0.13656	0.891379	0.930292
ENSMUSG00000017843_Ppp2r5c	108.301	0.894777	0.286653	3.12146	0.00179957	0.0187782
ENSMUSG00000017858_Ift52	37.1526	0.36325	0.415785	0.873648	0.38231	0.526924
ENSMUSG00000017861_Mybl2	13.7723	-1.85777	0.680825	-2.72871	0.00635833	0.0403951
ENSMUSG00000017868_Sgk2	4.41058	-1.14433	0.844013	-1.35582	0.175158	0.314055
ENSMUSG00000017897_Eya2	4.45084	-0.913498	0.809162	-1.12894	0.258922	0.407902
ENSMUSG00000017929_B4galt5	60.0722	0.587942	0.370257	1.58793	0.112302	0.234419
ENSMUSG00000017943_Gdap1l1	55.2098	0.0861461	0.344929	0.24975	0.802781	0.86805
ENSMUSG00000017950_Hnf4a	10.4574	-1.74247	0.765004	-2.27772	0.0227431	0.0865445
ENSMUSG00000017969_Ptgis	2.81874	-0.964264	0.848995	-1.13577	0.256053	0.404988
ENSMUSG00000017978_Cadps2	273.836	0.825684	0.232731	3.5478	0.000388457	0.00742382
ENSMUSG00000017999_Ddx27	79.7751	0.213701	0.31766	0.672733	0.501117	0.63326
ENSMUSG00000018001_Cyth3	305.81	0.615058	0.217021	2.8341	0.00459551	0.033489
ENSMUSG00000018008_Cyth4	4.62624	-0.272838	0.80182	-0.340273	0.733651	0.816541
ENSMUSG00000018012_Rac3	7.86189	-0.162819	0.71502	-0.227712	0.81987	0.880478
ENSMUSG00000018040_Rrp7a	47.2489	0.0403316	0.401794	0.100379	0.920044	0.949348
ENSMUSG00000018042_Cyb5r3	83.3892	-0.364005	0.32133	-1.13281	0.257296	0.406207
ENSMUSG00000018068_Ints2	59.8019	0.18203	0.336992	0.540162	0.589085	0.707108
ENSMUSG00000018076_Med13l	156.07	0.079356	0.239434	0.331431	0.740319	0.821307
ENSMUSG00000018102_Hist1h2bc	57.1015	0.399034	0.36609	1.08999	0.275719	0.424565
ENSMUSG00000018126_Baiap2l2	1.41966	-1.40123	0.799855	-1.75185	0.0797998	NA
ENSMUSG00000018143_Mafk	10.8686	-1.70047	0.684091	-2.48574	0.0129283	0.0615857
ENSMUSG00000018160_Med1	146.836	0.0571279	0.237075	0.240969	0.809579	0.872866
ENSMUSG00000018166_Erbb3	7.32387	-1.2259	0.744455	-1.64671	0.0996172	0.217151
ENSMUSG00000018167_Stard3	15.0243	0.0236043	0.585936	0.0402847	0.967866	0.980897
ENSMUSG00000018168_Ikzf3	29.4582	-2.37322	0.541477	-4.38287	1.17e-05	0.000892057
ENSMUSG00000018169_Mfng	3.23551	-1.30621	0.843337	-1.54886	0.121415	0.246812
ENSMUSG00000018171_Vmp1	136.448	0.452049	0.257379	1.75635	0.0790283	0.188422
ENSMUSG00000018189_Uchl5	91.3202	0.362317	0.301631	1.20119	0.229677	0.375849
ENSMUSG00000018196_Glrx2	93.5984	0.105497	0.277893	0.379633	0.704218	0.79643
ENSMUSG00000018199_Trove2	361.101	0.664958	0.243513	2.73069	0.00632016	0.0402616
ENSMUSG00000018209_Stk4	107.859	0.0169288	0.267673	0.0632442	0.949572	0.968822
ENSMUSG00000018217_Pmp22	27.0946	0.627037	0.466821	1.34321	0.179205	0.31889
ENSMUSG00000018238_Gdf9	8.31667	-1.76434	0.730361	-2.4157	0.0157048	0.0689122
ENSMUSG00000018239_Zcchc10	14.5589	0.320766	0.61082	0.525141	0.599485	0.714963
ENSMUSG00000018263_Tbx5	14.6528	-1.7058	0.698292	-2.44283	0.0145728	0.0657674
ENSMUSG00000018286_Psmb6	60.6723	0.462159	0.349889	1.32087	0.186544	0.327735
ENSMUSG00000018287_Spag7	129.384	0.731463	0.252586	2.89589	0.00378084	0.0298997
ENSMUSG00000018293_Pfn1	62.6418	0.724884	0.356329	2.03431	0.04192	0.126684
ENSMUSG00000018322_Tomm34	36.9507	1.05003	0.413207	2.54118	0.0110479	0.056037
ENSMUSG00000018326_Ywhab	300.317	0.698869	0.244428	2.8592	0.00424714	0.0319916
ENSMUSG00000018334_Ksr1	38.0292	-0.301126	0.445547	-0.675857	0.499132	0.631317
ENSMUSG00000018339_Gpx3	4.16592	-1.49333	0.822057	-1.81658	0.0692812	0.173735
ENSMUSG00000018340_Anxa6	117.067	0.925299	0.274118	3.37554	0.0007367	0.0109757
ENSMUSG00000018341_Il12rb2	2.34088	-1.27141	0.846671	-1.50165	0.133187	0.262574
ENSMUSG00000018347_Zkscan6	11.6283	-0.211048	0.616804	-0.342164	0.732227	0.815499
ENSMUSG00000018362_Kpna2	25.5561	0.326145	0.516979	0.630867	0.528128	0.655974
ENSMUSG00000018363_Smurf2	53.5372	0.450754	0.392843	1.14742	0.25121	0.399728
ENSMUSG00000018372_Cep95	37.1901	-0.217388	0.416049	-0.522505	0.601319	0.716515
ENSMUSG00000018377_Vezf1	106.23	0.521732	0.282464	1.84707	0.0647369	0.166994
ENSMUSG00000018378_Cuedc1	30.1252	0.039499	0.460645	0.0857472	0.931667	0.956937
ENSMUSG00000018379_Srsf1	286.349	0.619124	0.23842	2.59678	0.00941033	0.0510431
ENSMUSG00000018381_Abi3	11.6394	-2.0211	0.745318	-2.71172	0.00669343	0.0414989
ENSMUSG00000018387_Shroom1	9.87507	-1.42391	0.662993	-2.14769	0.0317381	0.106876
ENSMUSG00000018395_Kif3a	449.012	0.235554	0.177333	1.32832	0.184074	0.324632
ENSMUSG00000018398_Sept8	523.93	0.463245	0.185255	2.50058	0.0123992	0.0599053
ENSMUSG00000018401_Mtmr4	163.081	0.557328	0.247016	2.25625	0.0240552	0.0897775
ENSMUSG00000018405_Mrm1	11.0227	0.29282	0.667924	0.438404	0.661093	0.763056
ENSMUSG00000018411_Mapt	383.988	0.563289	0.198046	2.84423	0.00445189	0.0327809
ENSMUSG00000018412_Kansl1	144.669	0.617239	0.267854	2.30439	0.0212009	0.0827067
ENSMUSG00000018415_Gid4	57.9061	0.024249	0.345069	0.0702729	0.943976	0.965325
ENSMUSG00000018417_Myo1b	80.8038	0.341195	0.29383	1.1612	0.24556	0.393792
ENSMUSG00000018425_Dhx40	70.1958	0.0066805	0.326222	0.0204784	0.983662	0.990109
ENSMUSG00000018427_Ypel2	37.1578	-0.0299491	0.402115	-0.074479	0.940629	0.963237
ENSMUSG00000018428_Akap1	82.3001	0.128911	0.31544	0.408672	0.682781	0.779509
ENSMUSG00000018433_Nol11	73.9403	0.709438	0.346399	2.04804	0.0405561	0.124022
ENSMUSG00000018442_Derl2	58.6707	-0.59872	0.332536	-1.80046	0.0717873	0.177587
ENSMUSG00000018446_C1qbp	41.0982	0.285546	0.433288	0.659022	0.509882	0.640788
ENSMUSG00000018449_Rpain	8.86708	0.0177075	0.694509	0.0254965	0.979659	0.987731
ENSMUSG00000018451_6330403K07Rik	15.8149	0.416206	0.595915	0.698431	0.484908	0.618905
ENSMUSG00000018459_Slc13a3	26.0615	0.0028255	0.481148	0.00587241	0.995315	0.997014
ENSMUSG00000018470_Kcnab3	56.0226	0.524607	0.398266	1.31723	0.187763	0.329132
ENSMUSG00000018474_Chd3	323.266	0.183598	0.22662	0.810158	0.417849	0.559277
ENSMUSG00000018476_Kdm6b	72.7056	-0.0498201	0.325322	-0.153141	0.878287	0.921584
ENSMUSG00000018479_1700125H20Rik	0.848722	-0.788117	0.696982	-1.13076	0.258158	NA
ENSMUSG00000018481_Appbp2	180.475	0.619595	0.245192	2.52698	0.0115047	0.0572994
ENSMUSG00000018486_Wnt9b	18.2922	-1.7582	0.603087	-2.91534	0.00355298	0.0286491
ENSMUSG00000018500_Adora2b	5.96392	-0.716399	0.781199	-0.91705	0.359116	0.505325
ENSMUSG00000018501_Ncor1	781.046	0.544572	0.18077	3.01251	0.00259098	0.0234231
ENSMUSG00000018507_Trpv2	19.0018	-1.21313	0.574986	-2.10984	0.0348725	0.112767
ENSMUSG00000018509_Cenpv	5.6612	0.365631	0.776511	0.470864	0.637738	0.745259
ENSMUSG00000018537_Pcgf2	18.0045	-0.667338	0.546066	-1.22208	0.221676	0.367187
ENSMUSG00000018541_Cwc25	41.5684	-0.171072	0.411932	-0.415292	0.677928	0.775708
ENSMUSG00000018547_Pip4k2b	93.2859	0.213504	0.289925	0.736413	0.46148	0.598651
ENSMUSG00000018548_Trim37	602.038	0.679226	0.182303	3.72582	0.000194685	0.00491356
ENSMUSG00000018554_Ybx2	4.03677	-0.767251	0.83383	-0.920153	0.357493	0.503772
ENSMUSG00000018559_Ctdnep1	18.7991	0.107267	0.523773	0.204796	0.837731	0.893581
ENSMUSG00000018565_Elp5	40.7481	-0.0129	0.394645	-0.0326877	0.973924	0.984389
ENSMUSG00000018566_Slc2a4	12.8698	-1.19232	0.671143	-1.77655	0.0756416	0.183431
ENSMUSG00000018567_Gabarap	75.5411	0.781501	0.338125	2.31128	0.0208174	0.0817094
ENSMUSG00000018569_Cldn7	2.2836	-1.83257	0.84716	-2.16319	0.0305267	0.104035
ENSMUSG00000018570_2810408A11Rik	4.31204	-1.56245	0.831222	-1.8797	0.060149	0.158955
ENSMUSG00000018572_Phf23	65.3549	0.012963	0.375889	0.0344862	0.972489	0.983614
ENSMUSG00000018574_Acadvl	46.6664	0.443575	0.384561	1.15346	0.248723	0.397289
ENSMUSG00000018581_Dnah11	71.099	0.0476269	0.337013	0.141321	0.887617	0.927876
ENSMUSG00000018583_G3bp1	97.4709	0.351994	0.303224	1.16084	0.245708	0.39392
ENSMUSG00000018585_Atox1	17.8334	1.52313	0.592534	2.57053	0.0101544	0.0534945
ENSMUSG00000018589_Glra2	2.03165	-0.0927826	0.848205	-0.109387	0.912896	0.944612
ENSMUSG00000018593_Sparc	518.049	0.621922	0.198454	3.13384	0.00172537	0.0183909
ENSMUSG00000018595_Glra4	3.35486	-1.85978	0.83903	-2.21658	0.0266519	0.0957778
ENSMUSG00000018599_Mief2	14.325	-0.00425274	0.576684	-0.00737448	0.994116	0.99625
ENSMUSG00000018604_Tbx3	16.0191	-1.53165	0.602328	-2.54289	0.0109941	0.0558773
ENSMUSG00000018620_Mmp20	3.84197	-0.679474	0.816679	-0.831996	0.405411	0.548619
ENSMUSG00000018623_Mmp7	0.68174	-0.583703	0.630822	-0.925306	0.354807	NA
ENSMUSG00000018634_Crhr1	24.5862	1.02045	0.531547	1.91977	0.0548873	0.149921
ENSMUSG00000018648_Dusp14	15.0637	-0.544998	0.571053	-0.954373	0.339895	0.487028
ENSMUSG00000018651_Tada2a	30.7937	0.444401	0.462705	0.960441	0.336833	0.484226
ENSMUSG00000018654_Ikzf1	8.67122	-1.09645	0.725984	-1.5103	0.130967	0.259911
ENSMUSG00000018656_Tcaf3	7.03241	-1.55398	0.789338	-1.96872	0.0489857	0.139907
ENSMUSG00000018659_Pnpo	34.2945	0.145167	0.434998	0.333719	0.738591	0.81999
ENSMUSG00000018661_Cog1	56.6006	0.645008	0.365011	1.76709	0.0772132	0.185742
ENSMUSG00000018666_Cbx1	145.656	0.2737	0.280563	0.975539	0.329293	0.476918
ENSMUSG00000018669_Cdk5rap3	21.4582	0.0119376	0.49929	0.0239092	0.980925	0.98839
ENSMUSG00000018672_Copz2	7.12532	-0.75708	0.776157	-0.975421	0.329351	0.476976
ENSMUSG00000018677_Slc25a39	26.4431	1.06539	0.477233	2.23243	0.0255865	0.0935059
ENSMUSG00000018678_Sp2	26.85	-0.362088	0.466589	-0.776031	0.43773	0.57718
ENSMUSG00000018697_Aatf	157.583	0.0313392	0.274975	0.113971	0.909261	0.942176
ENSMUSG00000018698_Lhx1	100.77	0.569492	0.278544	2.04453	0.0409011	0.124678
ENSMUSG00000018707_Dync1h1	1250.66	0.853332	0.165828	5.14588	2.66e-07	9.43e-05
ENSMUSG00000018727_Cpsf4l	10.1483	-0.530174	0.65348	-0.811309	0.417188	0.558858
ENSMUSG00000018733_Pex12	22.4071	-0.950054	0.519123	-1.83011	0.067233	0.170536
ENSMUSG00000018736_Ndel1	119.843	0.598163	0.278574	2.14723	0.0317748	0.106914
ENSMUSG00000018740_Slc25a35	30.9338	-1.23284	0.476829	-2.5855	0.00972386	0.0519794
ENSMUSG00000018750_Zbtb4	247.421	0.321066	0.200184	1.60386	0.108746	0.229839
ENSMUSG00000018752_Tnfsfm13	2.94394	-0.0178933	0.847738	-0.0211072	0.98316	0.989831
ENSMUSG00000018761_Mpdu1	24.4703	0.00138878	0.474841	0.00292472	0.997666	0.998517
ENSMUSG00000018765_Fxr2	138.811	0.700764	0.256715	2.72974	0.00633841	0.0403463
ENSMUSG00000018770_Atp5g3	90.5314	0.755854	0.337593	2.23895	0.0251591	0.092505
ENSMUSG00000018774_Cd68	3.25068	0.154368	0.832494	0.185429	0.852893	0.903648
ENSMUSG00000018776_Slc35g3	9.08356	-2.43211	0.735232	-3.30794	0.00093984	0.0127857
ENSMUSG00000018796_Acsl1	58.1258	-0.452817	0.332618	-1.36137	0.173396	0.312241
ENSMUSG00000018800_Abca5	153.359	0.69173	0.275526	2.51058	0.0120534	0.0588937
ENSMUSG00000018809_Smyd4	25.9733	-0.35014	0.520746	-0.672383	0.50134	0.633459
ENSMUSG00000018819_Lsp1	16.8473	-2.5219	0.680861	-3.70398	0.000212241	0.00512616
ENSMUSG00000018820_Zfyve27	80.9125	-0.0467803	0.300091	-0.155887	0.876122	0.919941
ENSMUSG00000018821_Avpi1	5.73175	0.787379	0.774375	1.01679	0.309252	0.457938
ENSMUSG00000018822_Sfrp5	1.45183	-0.794586	0.833631	-0.953162	0.340508	NA
ENSMUSG00000018830_Myh11	13.4711	-0.60387	0.600409	-1.00576	0.314529	0.463069
ENSMUSG00000018841_Rad51d	21.7345	0.256163	0.500464	0.511852	0.608754	0.722242
ENSMUSG00000018844_Fndc8	4.83143	-0.545213	0.796226	-0.684747	0.493503	0.626369
ENSMUSG00000018845_Unc45b	7.00175	-1.91037	0.775912	-2.46209	0.0138128	0.0639611
ENSMUSG00000018846_Pank3	156.324	0.561444	0.262725	2.137	0.032598	0.108181
ENSMUSG00000018848_Rars	68.5086	0.162874	0.317175	0.513513	0.607592	0.721327
ENSMUSG00000018849_Wwc1	60.7763	0.0869597	0.36453	0.238553	0.811452	0.874411
ENSMUSG00000018858_Ict1	45.1653	0.0444115	0.382946	0.115973	0.907674	0.941174
ENSMUSG00000018861_Fdxr	19.7341	-0.253071	0.51889	-0.487717	0.625751	0.735813
ENSMUSG00000018862_Otop3	2.0245	-1.07612	0.84052	-1.28031	0.200437	0.34329
ENSMUSG00000018865_Sult4a1	117.981	0.445362	0.270204	1.64824	0.0993034	0.216889
ENSMUSG00000018868_Pnpla5	0.721286	-0.155386	0.705842	-0.220143	0.82576	NA
ENSMUSG00000018882_Mrpl45	71.6129	0.370303	0.307861	1.20283	0.229044	0.375257
ENSMUSG00000018893_Mb	1.88639	-1.02232	0.838452	-1.21929	0.222733	NA
ENSMUSG00000018899_Irf1	8.89621	-1.70265	0.725314	-2.34746	0.0189018	0.0772539
ENSMUSG00000018900_Slc22a5	9.27398	-1.31983	0.690448	-1.91155	0.055934	0.151841
ENSMUSG00000018906_P4ha2	36.6428	-0.628572	0.417529	-1.50545	0.132207	0.261608
ENSMUSG00000018907_Alox12e	5.63863	-2.42823	0.810011	-2.99777	0.00271962	0.0241645
ENSMUSG00000018909_Arrb1	288.063	0.431521	0.202213	2.13399	0.0328439	0.108531
ENSMUSG00000018914_Il3	0.854367	-0.846161	0.707658	-1.19572	0.231806	NA
ENSMUSG00000018916_Csf2	0.574235	-0.319799	0.673232	-0.475021	0.634772	NA
ENSMUSG00000018919_Tm4sf5	0.828791	-0.459075	0.698506	-0.657224	0.511037	NA
ENSMUSG00000018920_Cxcl16	6.50081	-0.353249	0.780219	-0.452756	0.650724	0.755307
ENSMUSG00000018921_Pelp1	63.8483	-0.362188	0.330961	-1.09435	0.2738	0.422524
ENSMUSG00000018923_Med11	7.73274	-1.0292	0.725025	-1.41954	0.155742	0.291173
ENSMUSG00000018924_Alox15	0.346988	-0.139322	0.605133	-0.230233	0.817911	NA
ENSMUSG00000018925_Heatr9	1.24295	-0.934874	0.72787	-1.2844	0.199003	NA
ENSMUSG00000018927_Ccl6	2.22103	-1.30436	0.848871	-1.53658	0.124397	0.25098
ENSMUSG00000018931_Natd1	25.1904	-0.840351	0.500262	-1.67982	0.0929922	0.208598
ENSMUSG00000018932_Map2k3	6.92679	0.188977	0.744217	0.253928	0.799551	0.866069
ENSMUSG00000018965_Ywhah	4513.76	0.419732	0.363749	1.1539	0.24854	0.397113
ENSMUSG00000018973_Hoxb1	10.3291	-2.62555	0.744673	-3.52578	0.000422239	0.00784866
ENSMUSG00000018974_Sart3	94.2433	-0.299863	0.292871	-1.02387	0.305895	0.454792
[truncated: 32,542 more rows]
